# Supplementary material for: Non-coding cancer driver candidates identified with a sample- and position-specific model of the somatic mutation rate
Source: eLife journal article supplement (doi:10.7554/elife.21778), 2017-03-31
Supplement: supp [file elife-21778-supp-v1.zip]

A protein-coding genes ( $n = 19,256$ )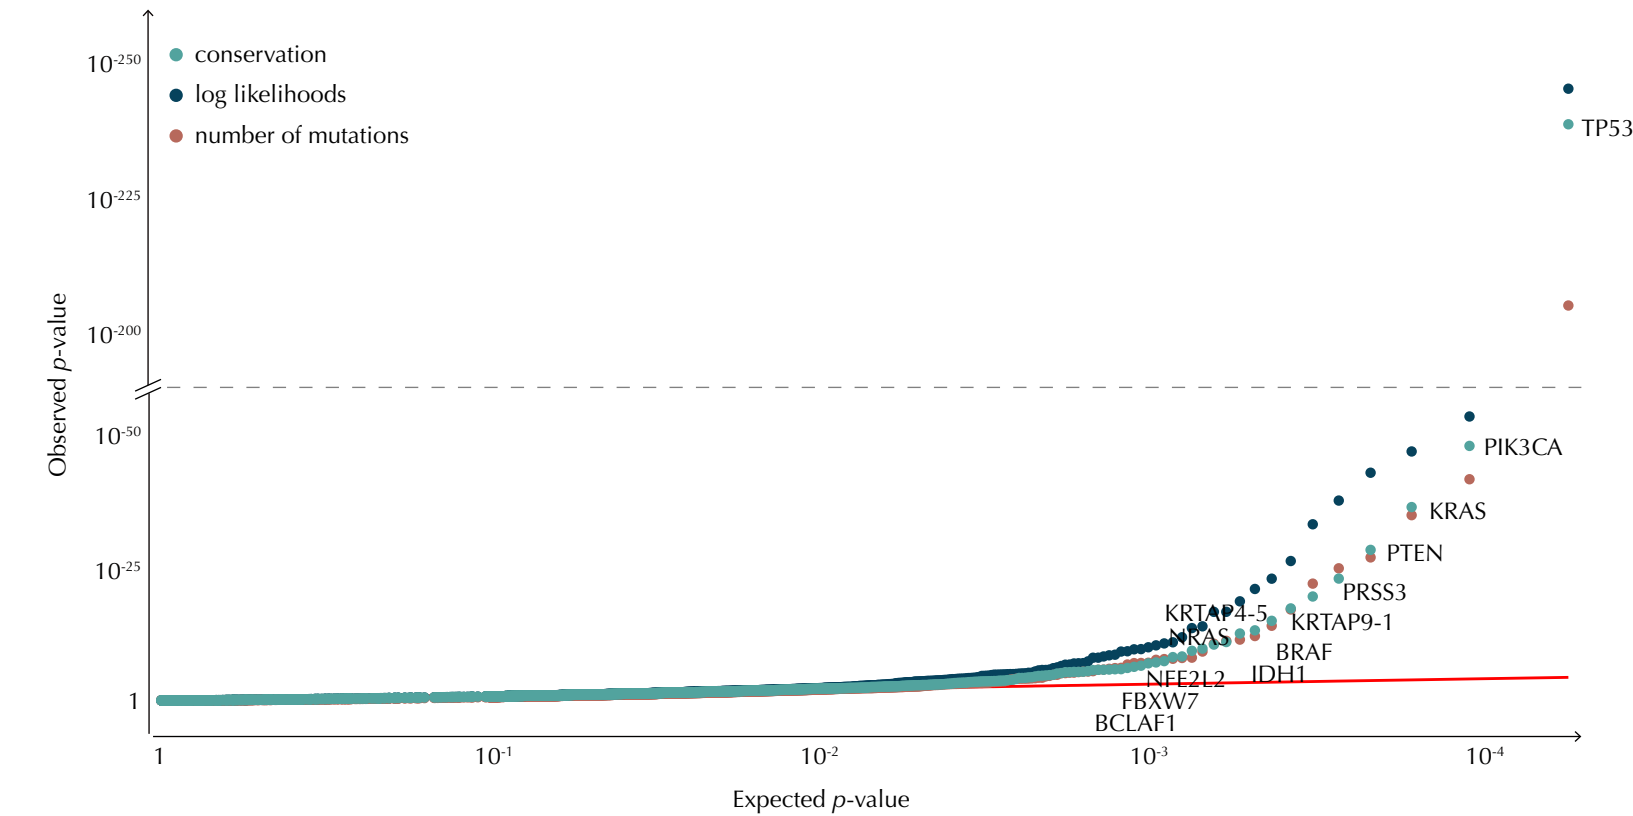

| rank | conservation |                         | log likelihoods |                         | number of mutations |                         |
|------|--------------|-------------------------|-----------------|-------------------------|---------------------|-------------------------|
|      | gene name    | q-value                 | gene name       | q-value                 | gene name           | q-value                 |
| 1    | TP53         | $1.15 \times 10^{-235}$ | TP53            | $2.65 \times 10^{-242}$ | TP53                | $8.21 \times 10^{-202}$ |
| 2    | PIK3CA       | $2.82 \times 10^{-44}$  | PIK3CA          | $8.90 \times 10^{-50}$  | PIK3CA              | $4.69 \times 10^{-38}$  |
| 3    | KRAS         | $4.93 \times 10^{-33}$  | MUC4            | $2.01 \times 10^{-43}$  | KRAS                | $1.61 \times 10^{-31}$  |
| 4    | PTEN         | $3.70 \times 10^{-25}$  | KRAS            | $1.42 \times 10^{-39}$  | PTEN                | $9.30 \times 10^{-24}$  |
| 5    | PRSS3        | $6.80 \times 10^{-20}$  | PRSS3           | $1.79 \times 10^{-34}$  | PRSS3               | $8.07 \times 10^{-22}$  |
| 6    | MUC4         | $1.26 \times 10^{-16}$  | PTEN            | $4.07 \times 10^{-30}$  | MUC4                | $4.95 \times 10^{-19}$  |
| 7    | KRTAP9-1     | $1.77 \times 10^{-14}$  | KRTAP9-1        | $2.51 \times 10^{-23}$  | KRTAP9-1            | $2.83 \times 10^{-14}$  |
| 8    | BRAF         | $3.25 \times 10^{-12}$  | KRTAP4-5        | $4.42 \times 10^{-20}$  | KRTAP4-5            | $2.71 \times 10^{-11}$  |
| 9    | IDH1         | $1.76 \times 10^{-10}$  | BRAF            | $3.28 \times 10^{-18}$  | BRAF                | $2.04 \times 10^{-9}$   |
| 10   | KRTAP4-5     | $6.11 \times 10^{-10}$  | AL390778.1      | $5.96 \times 10^{-16}$  | IDH1                | $8.41 \times 10^{-9}$   |

| gene name          | TP53  | PIK3CA | KRAS | PTEN  | PRSS3 | MUC4   | KRTAP9-1 | BRAF  | IDH1  | KRTAP4-5 | AL390778.1 |
|--------------------|-------|--------|------|-------|-------|--------|----------|-------|-------|----------|------------|
| region size (bp)   | 1,378 | 3,207  | 708  | 1,212 | 1,056 | 16,239 | 770      | 2,301 | 1,245 | 546      | 735        |
| observed mutations | 169   | 95     | 42   | 38    | 51    | 244    | 87       | 44    | 25    | 47       | 33         |
| expected mutations | 3.3   | 12.0   | 2.2  | 2.5   | 3.5   | 74.1   | 2.8      | 9.5   | 3.5   | 2.4      | 5.2        |

B 3' UTRs ( $n = 18,481$ )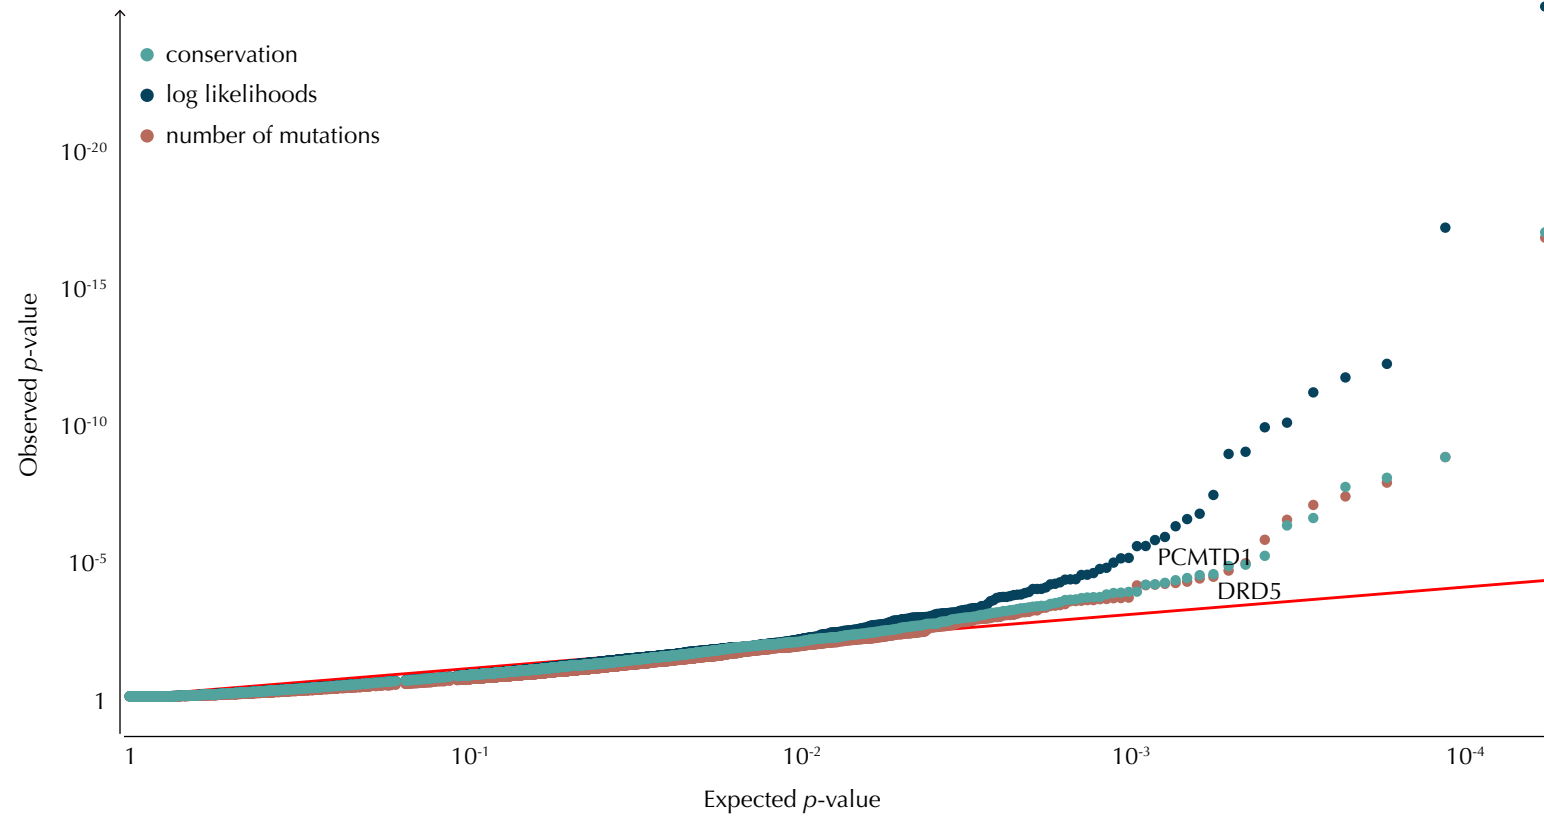

| rank | conservation |                        | log likelihoods |                        | number of mutations |                        |
|------|--------------|------------------------|-----------------|------------------------|---------------------|------------------------|
|      | gene name    | q-value                | gene name       | q-value                | gene name           | q-value                |
| 1    | MYO5B        | $1.46 \times 10^{-13}$ | MYO5B           | $7.03 \times 10^{-22}$ | MYO5B               | $2.33 \times 10^{-13}$ |
| 2    | PRSS3        | $1.41 \times 10^{-5}$  | VPS53           | $4.95 \times 10^{-14}$ | PRSS3               | $1.41 \times 10^{-5}$  |
| 3    | ADD2         | $5.44 \times 10^{-5}$  | PRSS3           | $3.44 \times 10^{-9}$  | ADD2                | $8.21 \times 10^{-5}$  |
| 4    | SEC14L1      | $8.87 \times 10^{-5}$  | SEC14L1         | $8.18 \times 10^{-9}$  | SEC14L1             | $1.98 \times 10^{-4}$  |
| 5    | FAHD2B       | $9.92 \times 10^{-4}$  | TBC1D22A        | $2.33 \times 10^{-8}$  | FAHD2B              | $3.27 \times 10^{-4}$  |
| 6    | VPS53        | $1.55 \times 10^{-3}$  | FAHD2B          | $2.53 \times 10^{-7}$  | VPS53               | $9.61 \times 10^{-4}$  |
| 7    | LRTM1        | $1.75 \times 10^{-2}$  | ADD2            | $3.21 \times 10^{-7}$  | TBC1D22A            | $4.48 \times 10^{-3}$  |
| 8    | SGCZ         | $3.23 \times 10^{-2}$  | FAM101B         | $2.24 \times 10^{-6}$  | LRTM1               | $2.89 \times 10^{-2}$  |
| 9    | ELOVL3       | $3.23 \times 10^{-2}$  | MUC19           | $2.40 \times 10^{-6}$  | SGCZ                | $4.77 \times 10^{-2}$  |
| 10   | DRD5         | $5.76 \times 10^{-2}$  | LRTM1           | $7.01 \times 10^{-5}$  | C7                  | $7.25 \times 10^{-2}$  |

| gene name          | MYO5B | PRSS3 | ADD2  | SEC14L1 | FAHD2B | VPS53  | LRTM1 | SGCZ | ELOVL3 | DRD5 | C7    | TBC1D22A | FAM101B | MUC19 |
|--------------------|-------|-------|-------|---------|--------|--------|-------|------|--------|------|-------|----------|---------|-------|
| region size (bp)   | 3,658 | 52    | 8,257 | 3,052   | 172    | 11,085 | 222   | 579  | 337    | 545  | 1,366 | 2,067    | 3,186   | 8,002 |
| observed mutations | 78    | 7     | 50    | 31      | 10     | 56     | 9     | 19   | 8      | 22   | 22    | 37       | 19      | 126   |
| expected mutations | 10.1  | 0.2   | 12.4  | 7.9     | 0.8    | 19.0   | 1.1   | 5.0  | 1.0    | 3.5  | 6.1   | 9.9      | 4.6     | 61.6  |

C 5' UTRs ( $n = 18,220$ )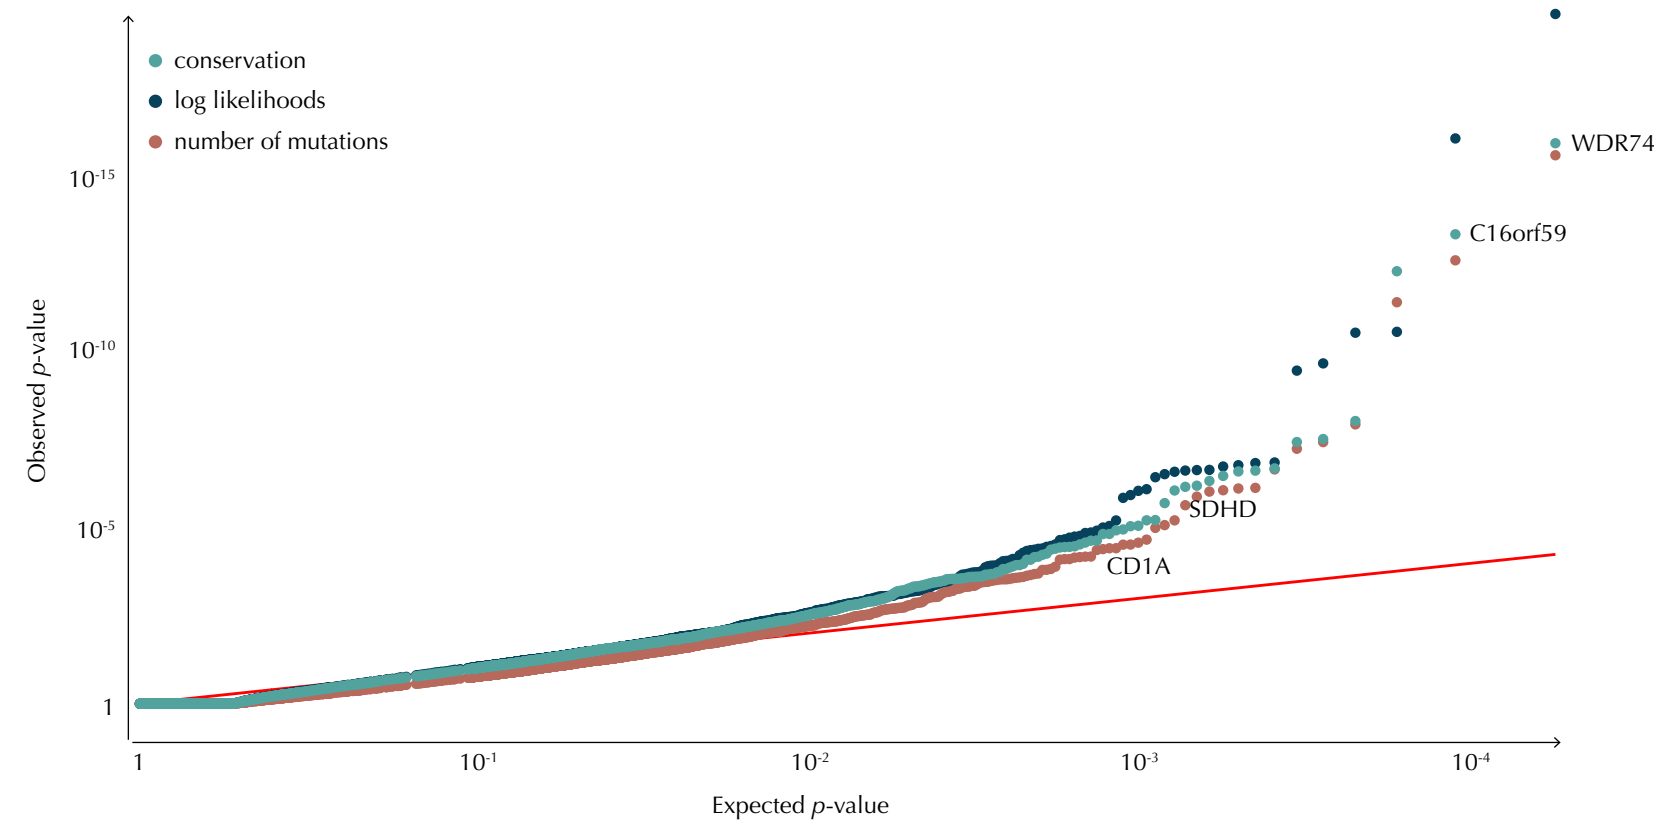

| rank | conservation |                        | log likelihoods |                        | number of mutations |                        |
|------|--------------|------------------------|-----------------|------------------------|---------------------|------------------------|
|      | gene name    | q-value                | gene name       | q-value                | gene name           | q-value                |
| 1    | WDR74        | $1.84 \times 10^{-12}$ | WDR74           | $3.79 \times 10^{-16}$ | WDR74               | $4.07 \times 10^{-12}$ |
| 2    | C16orf59     | $3.66 \times 10^{-10}$ | MRPL36          | $6.74 \times 10^{-13}$ | MRPL36              | $2.02 \times 10^{-9}$  |
| 3    | MRPL36       | $2.76 \times 10^{-9}$  | MTG2            | $1.18 \times 10^{-7}$  | C16orf59            | $2.12 \times 10^{-8}$  |
| 4    | MTRNR2L13    | $3.89 \times 10^{-5}$  | HLA-F           | $1.18 \times 10^{-7}$  | MTRNR2L13           | $4.86 \times 10^{-5}$  |
| 5    | HLA-F        | $1.02 \times 10^{-4}$  | C16orf59        | $7.07 \times 10^{-7}$  | MTG2                | $1.24 \times 10^{-4}$  |
| 6    | MTG2         | $1.03 \times 10^{-4}$  | ZNF717          | $9.47 \times 10^{-7}$  | HLA-F               | $1.61 \times 10^{-4}$  |
| 7    | NDUFB9       | $4.75 \times 10^{-4}$  | NDUFB9          | $3.08 \times 10^{-4}$  | EVI2A               | $5.34 \times 10^{-4}$  |
| 8    | PRKAG1       | $4.75 \times 10^{-4}$  | TBC1D12         | $3.08 \times 10^{-4}$  | DHX16               | $1.46 \times 10^{-3}$  |
| 9    | EVI2A        | $4.75 \times 10^{-4}$  | MTRNR2L13       | $3.10 \times 10^{-4}$  | ZNF717              | $1.46 \times 10^{-3}$  |
| 10   | TBC1D12      | $5.74 \times 10^{-4}$  | EVI2A           | $3.10 \times 10^{-4}$  | PRKAG1              | $1.46 \times 10^{-3}$  |

| gene name          | WDR74 | C16orf59 | MRPL36 | MTRNR2L13 | HLA-F | MTG2 | NDUFB9 | PRKAG1 | EVI2A | TBC1D12 | DHX16 | ZNF717 |
|--------------------|-------|----------|--------|-----------|-------|------|--------|--------|-------|---------|-------|--------|
| region size (bp)   | 839   | 173      | 166    | 941       | 384   | 26   | 84     | 487    | 548   | 110     | 323   | 600    |
| observed mutations | 30    | 12       | 18     | 20        | 19    | 5    | 6      | 11     | 9     | 6       | 10    | 27     |
| expected mutations | 2.4   | 0.6      | 0.9    | 3.7       | 2.2   | 0.1  | 0.3    | 1.4    | 0.7   | 0.3     | 1.1   | 4.4    |
