# Supplementary material for: Non-coding cancer driver candidates identified with a sample- and position-specific model of the somatic mutation rate
Source: eLife journal article supplement (doi:10.7554/elife.21778), 2017-03-31
Supplement: supp [file elife-21778-supp-v2.zip]

Archive with 37 entries (37 files):
- elife_poa_e21778_Supplementary_File_3.xlsx
- elife_poa_e21778_Figure_1_source_data_1.txt
- elife_poa_e21778_Figure_4_figure_supplement_2.pdf
- elife_poa_e21778_Figure_5_figure_supplement_1_source_data_1.txt
- elife_poa_e21778_Supplementary_File_2.xlsx
- elife_poa_e21778_Figure_5_figure_supplement_3_source_data_1.txt
- elife_poa_e21778_Figure_4_figure_supplement_1.pdf
- elife_poa_e21778_Figure_6_source_data_2.txt
- elife_poa_e21778_Figure_7_source_data_1.txt
- elife_poa_e21778_Figure_A3_source_data_1.txt
- elife_poa_e21778_Appendix_Figure_1.pdf
- elife_poa_e21778_Figure_6_figure_supplement_1.pdf
- elife_poa_e21778_Appendix_Figure_4.pdf
- elife_poa_e21778_Figure_4_source_data_4.txt
- elife_poa_e21778_Figure_5_figure_supplement_2.pdf
- elife_poa_e21778_Appendix_Figure_3.pdf
- elife_poa_e21778_Supplementary_File_6.xlsx
- elife_poa_e21778_Figure_1_figure_supplement_1_source_data_1.txt
- elife_poa_e21778_Figure_4_source_data_2.txt
- elife_poa_e21778_Figure_1_figure_supplement_1.pdf
- elife_poa_e21778_Figure_5_figure_supplement_1.pdf
- elife_poa_e21778_Figure_5_figure_supplement_2_source_data_1.txt
- elife_poa_e21778_Figure_4_source_data_3.txt
- elife_poa_e21778_Figure_4_source_data_5.txt
- elife_poa_e21778_Appendix_Figure_2.pdf
- elife_poa_e21778_Supplementary_File_5.xlsx
- elife_poa_e21778_Figure_3_figure_supplement_1.pdf
- elife_poa_e21778_Supplementary_File_7.xlsx
- elife_poa_e21778_Figure_6_source_data_1.txt
- elife_poa_e21778_Figure_4_source_data_1.txt
- elife_poa_e21778_Figure_4_figure_supplement_1_source_data_1.txt
- elife_poa_e21778_Supplementary_File_1.xlsx
- elife_poa_e21778_Figure_A2_source_data_1.txt
- elife_poa_e21778_Supplementary_File_4.xlsx
- elife_poa_e21778_Figure_5_figure_supplement_3.pdf
- elife_poa_e21778_Figure_5_source_data_1.txt
- elife_poa_e21778_Figure_4_figure_supplement_2_source_data_1.txt
