# Supplementary material for: Non-coding cancer driver candidates identified with a sample- and position-specific model of the somatic mutation rate
Source: eLife journal article supplement (doi:10.7554/elife.21778), 2017-03-31
Supplement: supp [file elife-21778-supp-v2.zip › elife_poa_e21778_Figure_1_figure_supplement_1_source_data_1.txt]

mutation_rate	element_type
7.04609661881165e-06	promoters
5.1454554625777e-06	splice_sites
7.10239189398162e-06	3UTRs
6.40027542640103e-06	5UTRs
7.44139660348557e-06	protein_coding_genes
1.341918e-05	intergenic
