# Supplementary material for: Non-coding cancer driver candidates identified with a sample- and position-specific model of the somatic mutation rate
Source: eLife journal article supplement (doi:10.7554/elife.21778), 2017-03-31
Supplement: supp [file elife-21778-supp-v2.zip › elife_poa_e21778_Figure_1_source_data_1.txt]

sample_id	n_mut	cancer_type
TCGA-BL-A13J-01A	10751	BLCA
TCGA-BT-A20P-01A	10001	BLCA
TCGA-BT-A20Q-01A	8931	BLCA
TCGA-BT-A20T-01A	27748	BLCA
TCGA-BT-A20V-01A	9598	BLCA
TCGA-BT-A2LA-01A	14445	BLCA
TCGA-BT-A3PH-01A	38322	BLCA
TCGA-BT-A3PJ-01A	42557	BLCA
TCGA-CF-A27C-01A	15325	BLCA
TCGA-CF-A3MF-01A	3750	BLCA
TCGA-DK-A1A5-01A	29394	BLCA
TCGA-DK-A1A6-01A	32000	BLCA
TCGA-DK-A1AA-01A	13177	BLCA
TCGA-DK-A1AE-01A	13904	BLCA
TCGA-DK-A1AG-01A	9681	BLCA
TCGA-DK-A3IL-01A	17163	BLCA
TCGA-FD-A3N5-01A	35099	BLCA
TCGA-FD-A3N6-01A	15091	BLCA
TCGA-FT-A3EE-01A	11606	BLCA
TCGA-GD-A2C5-01A	18753	BLCA
TCGA-H4-A2HQ-01A	43495	BLCA
TCGA-A1-A0SM-01A	2649	BRCA
TCGA-A2-A04P-01A	11617	BRCA
TCGA-A2-A04Q-01A	1463	BRCA
TCGA-A2-A04T-01A	9385	BRCA
TCGA-A2-A04X-01A	4200	BRCA
TCGA-A2-A0CM-01A	10102	BRCA
TCGA-A2-A0D0-01A	8787	BRCA
TCGA-A2-A0D1-01A	5846	BRCA
TCGA-A2-A0D2-01A	8728	BRCA
TCGA-A2-A0D4-01A	4357	BRCA
TCGA-A2-A0EY-01A	17629	BRCA
TCGA-A2-A0YG-01A	4165	BRCA
TCGA-A2-A259-01A	2297	BRCA
TCGA-A2-A25B-01A	7982	BRCA
TCGA-A2-A3KC-01A	3096	BRCA
TCGA-A2-A3XX-01A	3881	BRCA
TCGA-A2-A3Y0-01A	12213	BRCA
TCGA-A7-A0CE-01A	9654	BRCA
TCGA-A7-A13D-01A	9164	BRCA
TCGA-A7-A26G-01A	3800	BRCA
TCGA-A8-A075-01A	7933	BRCA
TCGA-A8-A07B-01A	7295	BRCA
TCGA-A8-A07I-01A	5864	BRCA
TCGA-A8-A08B-01A	4513	BRCA
TCGA-A8-A08L-01A	23332	BRCA
TCGA-A8-A08S-01A	5300	BRCA
TCGA-A8-A092-01A	9040	BRCA
TCGA-A8-A094-01A	18644	BRCA
TCGA-A8-A09I-01A	11553	BRCA
TCGA-A8-A09X-01A	3550	BRCA
TCGA-AC-A2BK-01A	14582	BRCA
TCGA-AN-A04D-01A	9990	BRCA
TCGA-AN-A0AT-01A	10156	BRCA
TCGA-AN-A0XR-01A	4203	BRCA
TCGA-AO-A03L-01A	2913	BRCA
TCGA-AO-A03N-01B	8647	BRCA
TCGA-AO-A0J2-01A	9569	BRCA
TCGA-AO-A0J4-01A	7664	BRCA
TCGA-AO-A0J6-01A	13398	BRCA
TCGA-AO-A0JM-01A	4219	BRCA
TCGA-AO-A124-01A	18248	BRCA
TCGA-AO-A12H-01A	2657	BRCA
TCGA-AQ-A04J-01A	5323	BRCA
TCGA-AR-A0TX-01A	22584	BRCA
TCGA-AR-A1AY-01A	5866	BRCA
TCGA-AR-A24Z-01A	5635	BRCA
TCGA-AR-A256-01A	18780	BRCA
TCGA-AR-A2LK-01A	4757	BRCA
TCGA-B6-A0I1-01A	7854	BRCA
TCGA-B6-A0I2-01A	5508	BRCA
TCGA-B6-A0IJ-01A	13827	BRCA
TCGA-B6-A0IQ-01A	5140	BRCA
TCGA-B6-A0RE-01A	9017	BRCA
TCGA-B6-A0RT-01A	1365	BRCA
TCGA-B6-A0RU-01A	4690	BRCA
TCGA-B6-A0WX-01A	3983	BRCA
TCGA-BH-A0AV-01A	7053	BRCA
TCGA-BH-A0B3-01A	5061	BRCA
TCGA-BH-A0B9-01A	4132	BRCA
TCGA-BH-A0BW-01A	9985	BRCA
TCGA-BH-A0DG-01A	2278	BRCA
TCGA-BH-A0DT-01A	1546	BRCA
TCGA-BH-A0E0-01A	4525	BRCA
TCGA-BH-A0EA-01A	1975	BRCA
TCGA-BH-A0H0-01A	3708	BRCA
TCGA-BH-A0H6-01A	3063	BRCA
TCGA-BH-A0WA-01A	7085	BRCA
TCGA-BH-A18R-01A	3841	BRCA
TCGA-BH-A18U-01A	7085	BRCA
TCGA-BH-A1FC-01A	6538	BRCA
TCGA-C8-A12L-01A	9625	BRCA
TCGA-C8-A12Q-01A	10796	BRCA
TCGA-C8-A130-01A	4734	BRCA
TCGA-D8-A27F-01A	10045	BRCA
TCGA-D8-A27H-01A	11613	BRCA
TCGA-E2-A109-01A	9094	BRCA
TCGA-E2-A14P-01A	8285	BRCA
TCGA-E2-A14X-01A	2769	BRCA
TCGA-E2-A152-01A	11885	BRCA
TCGA-E2-A156-01A	2724	BRCA
TCGA-E2-A15E-01A	2858	BRCA
TCGA-E2-A15H-01A	2492	BRCA
TCGA-E2-A15K-01A	4666	BRCA
TCGA-E2-A1LG-01A	11997	BRCA
TCGA-E2-A1LK-01A	6003	BRCA
TCGA-E2-A1LL-01A	6565	BRCA
TCGA-E9-A1NH-01A	2694	BRCA
TCGA-EW-A1J5-01A	39738	BRCA
TCGA-EW-A1P8-01A	4107	BRCA
TCGA-EW-A1PB-01A	13828	BRCA
TCGA-EW-A1PC-01B	15889	BRCA
TCGA-EW-A1PH-01A	7253	BRCA
TCGA-EW-A3U0-01A	12112	BRCA
TCGA-GI-A2C9-01A	10466	BRCA
TCGA-GM-A2DF-01A	1952	BRCA
TCGA-GM-A3XL-01A	8255	BRCA
TCGA-A6-2680-01A	12047	CRC
TCGA-A6-2681-01A	13905	CRC
TCGA-A6-2683-01A	23611	CRC
TCGA-A6-3807-01A	7901	CRC
TCGA-A6-6141-01A	196614	CRC
TCGA-A6-6781-01A	108052	CRC
TCGA-AA-3514-01A	15255	CRC
TCGA-AA-3516-01A	150995	CRC
TCGA-AA-3518-01A	75849	CRC
TCGA-AA-3529-01A	16522	CRC
TCGA-AA-3534-01A	12791	CRC
TCGA-AA-3555-01A	244719	CRC
TCGA-AA-3664-01A	20371	CRC
TCGA-AA-3666-01A	24034	CRC
TCGA-AA-3956-01A	14023	CRC
TCGA-AA-3977-01A	724186	CRC
TCGA-AA-3994-01A	19827	CRC
TCGA-AA-A01R-01A	135481	CRC
TCGA-AA-A01S-01A	9023	CRC
TCGA-AA-A01T-01A	12956	CRC
TCGA-AA-A01V-01A	18614	CRC
TCGA-AA-A01X-01A	10143	CRC
TCGA-AA-A02O-01A	22381	CRC
TCGA-AA-A03F-01A	17081	CRC
TCGA-AD-6964-01A	88326	CRC
TCGA-AF-2691-01A	15172	CRC
TCGA-AF-3913-01A	14607	CRC
TCGA-AG-3574-01A	11154	CRC
TCGA-AG-3593-01A	19316	CRC
TCGA-AG-3727-01A	13088	CRC
TCGA-AG-3885-01A	11611	CRC
TCGA-AG-3890-01A	12966	CRC
TCGA-AG-3896-01A	12451	CRC
TCGA-AG-3901-01A	7454	CRC
TCGA-AG-4007-01A	19375	CRC
TCGA-AG-4008-01A	12069	CRC
TCGA-AG-4015-01A	13119	CRC
TCGA-AG-A032-01A	8329	CRC
TCGA-AZ-6601-01A	112644	CRC
TCGA-CA-6717-01A	1027245	CRC
TCGA-CA-6718-01A	717991	CRC
TCGA-EI-6917-01A	742096	CRC
TCGA-02-2483-01A	6764	GBM
TCGA-02-2485-01A	7234	GBM
TCGA-06-0125-01A	9936	GBM
TCGA-06-0157-01A	6210	GBM
TCGA-06-0190-01A	6264	GBM
TCGA-06-0686-01A	8930	GBM
TCGA-06-0744-01A	11922	GBM
TCGA-06-0745-01A	9063	GBM
TCGA-06-2557-01A	7264	GBM
TCGA-06-2570-01A	4247	GBM
TCGA-06-5411-01A	9116	GBM
TCGA-06-5415-01A	7790	GBM
TCGA-14-1034-01A	8446	GBM
TCGA-14-1823-01A	6069	GBM
TCGA-14-2554-01A	10607	GBM
TCGA-15-1444-01A	8877	GBM
TCGA-19-2620-01A	10375	GBM
TCGA-19-2624-01A	4983	GBM
TCGA-19-2629-01A	6409	GBM
TCGA-19-5960-01A	7687	GBM
TCGA-26-5132-01A	11338	GBM
TCGA-26-5135-01A	12855	GBM
TCGA-27-1831-01A	5965	GBM
TCGA-27-2523-01A	8158	GBM
TCGA-27-2528-01A	12290	GBM
TCGA-32-1970-01A	8781	GBM
TCGA-41-5651-01A	11171	GBM
TCGA-BA-4076-01A	69232	HNSC
TCGA-BA-4077-01B	19322	HNSC
TCGA-BA-5153-01A	4691	HNSC
TCGA-BA-A4IH-01A	4496	HNSC
TCGA-CN-4737-01A	4569	HNSC
TCGA-CN-4741-01A	12268	HNSC
TCGA-CN-5365-01A	6757	HNSC
TCGA-CN-5374-01A	12424	HNSC
TCGA-CR-5249-01A	3768	HNSC
TCGA-CR-5250-01A	4875	HNSC
TCGA-CR-6467-01A	4847	HNSC
TCGA-CR-6470-01A	3062	HNSC
TCGA-CR-6472-01A	43492	HNSC
TCGA-CR-6480-01A	7505	HNSC
TCGA-CR-6482-01A	3262	HNSC
TCGA-CR-6487-01A	9050	HNSC
TCGA-CR-7385-01A	3008	HNSC
TCGA-CR-7404-01A	7662	HNSC
TCGA-CV-5442-01A	25809	HNSC
TCGA-CV-5443-01A	5102	HNSC
TCGA-CV-6433-01A	6587	HNSC
TCGA-CV-6961-01A	40244	HNSC
TCGA-CV-7090-01A	4633	HNSC
TCGA-CV-7100-01A	3371	HNSC
TCGA-CV-7180-01A	5991	HNSC
TCGA-CV-7255-01A	9203	HNSC
TCGA-CV-7416-01A	10129	HNSC
TCGA-KL-8323-01A	4008	KICH
TCGA-KL-8325-01A	3156	KICH
TCGA-KL-8341-01A	4543	KICH
TCGA-KL-8342-01A	2632	KICH
TCGA-KM-8440-01A	4913	KICH
TCGA-KN-8418-01A	3192	KICH
TCGA-KN-8424-01A	3238	KICH
TCGA-KN-8429-01A	2206	KICH
TCGA-KN-8434-01A	3110	KICH
TCGA-KN-8435-01A	5146	KICH
TCGA-KO-8406-01A	3498	KICH
TCGA-KO-8407-01A	2817	KICH
TCGA-KO-8411-01A	4364	KICH
TCGA-KO-8416-01A	3472	KICH
TCGA-KO-8417-01A	2770	KICH
TCGA-A3-3308-01A	7812	KIRC
TCGA-A3-3324-01A	5652	KIRC
TCGA-A3-3370-01A	4860	KIRC
TCGA-A3-3372-01A	7348	KIRC
TCGA-A3-3387-01A	4457	KIRC
TCGA-AK-3454-01A	5329	KIRC
TCGA-AK-3455-01A	5761	KIRC
TCGA-B0-5094-01A	7471	KIRC
TCGA-B0-5693-01A	4765	KIRC
TCGA-B2-4099-01A	6800	KIRC
TCGA-B2-4101-01A	5812	KIRC
TCGA-B2-4102-01A	5060	KIRC
TCGA-BP-4781-01A	7457	KIRC
TCGA-BP-4968-01A	5332	KIRC
TCGA-BP-4977-01A	3988	KIRC
TCGA-BP-5010-01A	4121	KIRC
TCGA-BP-5168-01A	9990	KIRC
TCGA-CJ-4639-01A	5106	KIRC
TCGA-CJ-4885-01A	6350	KIRC
TCGA-CJ-4899-01A	4224	KIRC
TCGA-CJ-4918-01A	5489	KIRC
TCGA-CJ-5682-01A	8089	KIRC
TCGA-CJ-6033-01A	5598	KIRC
TCGA-CW-6087-01A	2616	KIRC
TCGA-CW-6093-01A	8638	KIRC
TCGA-CZ-4856-01A	5848	KIRC
TCGA-CZ-5454-01A	5391	KIRC
TCGA-CZ-5987-01A	5907	KIRC
TCGA-DV-5566-01A	6112	KIRC
TCGA-CS-5395-01A	6211	LGG
TCGA-CS-6668-01A	3196	LGG
TCGA-CS-6669-01A	601	LGG
TCGA-DB-5278-01A	888	LGG
TCGA-DU-5874-01A	4517	LGG
TCGA-DU-6401-01A	2128	LGG
TCGA-DU-7009-01A	2199	LGG
TCGA-DU-7301-01A	3511	LGG
TCGA-E1-5318-01A	3014	LGG
TCGA-E1-5319-01A	2001	LGG
TCGA-EZ-7264-01A	2885	LGG
TCGA-FG-5964-01A	3343	LGG
TCGA-FG-8182-01A	1615	LGG
TCGA-HT-7602-01A	983	LGG
TCGA-HT-7689-01A	2832	LGG
TCGA-HT-7695-01A	1635	LGG
TCGA-HW-7486-01A	1355	LGG
TCGA-HW-7487-01A	3013	LGG
TCGA-05-4389-01A	18834	LUAD
TCGA-05-4395-01A	42138	LUAD
TCGA-05-4396-01A	42692	LUAD
TCGA-05-4397-01A	104299	LUAD
TCGA-05-4398-01A	76047	LUAD
TCGA-05-4420-01A	32198	LUAD
TCGA-05-4422-01A	5238	LUAD
TCGA-05-4432-01A	50402	LUAD
TCGA-05-5429-01A	10582	LUAD
TCGA-38-4630-01A	50543	LUAD
TCGA-44-2659-01A	45131	LUAD
TCGA-44-2665-01A	7562	LUAD
TCGA-44-2666-01A	2883	LUAD
TCGA-44-6148-01A	773	LUAD
TCGA-49-4486-01A	10809	LUAD
TCGA-49-4510-01A	6148	LUAD
TCGA-49-4512-01A	2768	LUAD
TCGA-49-6742-01A	29523	LUAD
TCGA-50-5066-01A	143256	LUAD
TCGA-50-5930-01A	135112	LUAD
TCGA-50-5932-01A	13093	LUAD
TCGA-50-6591-01A	6507	LUAD
TCGA-50-6597-01A	6076	LUAD
TCGA-55-1594-01A	14078	LUAD
TCGA-55-1596-01A	27186	LUAD
TCGA-55-6972-01A	35655	LUAD
TCGA-55-6982-01A	5520	LUAD
TCGA-55-6984-01A	2739	LUAD
TCGA-55-6986-01A	1373	LUAD
TCGA-55-7281-01A	53882	LUAD
TCGA-55-8299-01A	1734	LUAD
TCGA-64-1678-01A	54416	LUAD
TCGA-67-3771-01A	107652	LUAD
TCGA-67-3772-01A	2053	LUAD
TCGA-67-6215-01A	8177	LUAD
TCGA-73-4659-01A	20876	LUAD
TCGA-75-5147-01A	22651	LUAD
TCGA-75-6203-01A	62803	LUAD
TCGA-75-7030-01A	1506	LUAD
TCGA-78-7146-01A	37400	LUAD
TCGA-78-7156-01A	31962	LUAD
TCGA-78-7158-01A	38606	LUAD
TCGA-78-7535-01A	21208	LUAD
TCGA-91-6840-01A	14688	LUAD
TCGA-91-6847-01A	7840	LUAD
TCGA-97-8171-01A	6323	LUAD
TCGA-18-3408-01A	11880	LUSC
TCGA-18-3415-01A	26225	LUSC
TCGA-18-4721-01A	21931	LUSC
TCGA-21-1076-01A	23497	LUSC
TCGA-21-1078-01A	5561	LUSC
TCGA-21-1082-01A	41447	LUSC
TCGA-21-5782-01A	50893	LUSC
TCGA-22-1016-01A	40578	LUSC
TCGA-22-5477-01A	24617	LUSC
TCGA-22-5492-01A	40249	LUSC
TCGA-33-4586-01A	69276	LUSC
TCGA-34-2596-01A	42244	LUSC
TCGA-34-2600-01A	46325	LUSC
TCGA-34-5240-01A	31735	LUSC
TCGA-37-4135-01A	54935	LUSC
TCGA-43-3394-01A	30274	LUSC
TCGA-43-3920-01A	41506	LUSC
TCGA-43-5670-01A	14515	LUSC
TCGA-52-7812-01A	53065	LUSC
TCGA-56-1622-01A	43734	LUSC
TCGA-56-7582-01A	31538	LUSC
TCGA-60-2695-01A	25826	LUSC
TCGA-60-2698-01A	85369	LUSC
TCGA-60-2711-01A	16263	LUSC
TCGA-60-2713-01A	34703	LUSC
TCGA-60-2719-01A	25262	LUSC
TCGA-60-2722-01A	53069	LUSC
TCGA-60-2724-01A	44113	LUSC
TCGA-66-2744-01A	38222	LUSC
TCGA-66-2756-01A	67703	LUSC
TCGA-66-2757-01A	36040	LUSC
TCGA-66-2759-01A	66634	LUSC
TCGA-66-2766-01A	55318	LUSC
TCGA-66-2789-01A	58441	LUSC
TCGA-66-2793-01A	47756	LUSC
TCGA-66-2795-01A	57564	LUSC
TCGA-68-7755-01A	48173	LUSC
TCGA-68-8250-01A	47153	LUSC
TCGA-77-6843-01A	22976	LUSC
TCGA-77-7139-01A	29594	LUSC
TCGA-85-8277-01A	43288	LUSC
TCGA-92-8064-01A	28579	LUSC
TCGA-94-7943-01A	16589	LUSC
TCGA-96-7545-01A	16846	LUSC
TCGA-98-8022-01A	31242	LUSC
TCGA-CH-5750-01A	3975	PRAD
TCGA-CH-5763-01A	457	PRAD
TCGA-CH-5771-01A	1412	PRAD
TCGA-CH-5788-01A	3871	PRAD
TCGA-CH-5789-01A	724	PRAD
TCGA-EJ-5503-01A	540	PRAD
TCGA-EJ-5506-01A	546	PRAD
TCGA-EJ-7791-01A	642	PRAD
TCGA-G9-6336-01A	764	PRAD
TCGA-G9-6365-01A	2235	PRAD
TCGA-G9-6370-01A	1018	PRAD
TCGA-G9-7522-01A	774	PRAD
TCGA-HC-7075-01A	2804	PRAD
TCGA-HC-7079-01A	492	PRAD
TCGA-HC-7233-01A	3251	PRAD
TCGA-HC-7737-01A	945	PRAD
TCGA-HC-7740-01A	951	PRAD
TCGA-HC-7744-01A	3191	PRAD
TCGA-HC-8258-01A	905	PRAD
TCGA-HI-7169-01A	2281	PRAD
TCGA-D3-A1Q1-06A	7875	SKCM
TCGA-D3-A1Q5-06A	73777	SKCM
TCGA-D3-A3MO-06A	8233	SKCM
TCGA-D9-A148-06A	46693	SKCM
TCGA-DA-A1HV-06A	278080	SKCM
TCGA-DA-A1HW-06A	57249	SKCM
TCGA-DA-A1HY-06A	123390	SKCM
TCGA-DA-A1I0-06A	92910	SKCM
TCGA-DA-A1I2-06A	23877	SKCM
TCGA-DA-A1I8-06A	29262	SKCM
TCGA-DA-A1IC-06A	144779	SKCM
TCGA-DA-A3F3-06A	48023	SKCM
TCGA-DA-A3F5-06A	45205	SKCM
TCGA-DA-A3F8-06A	169375	SKCM
TCGA-EE-A185-06A	40488	SKCM
TCGA-EE-A29B-06A	98922	SKCM
TCGA-EE-A2A0-06A	45403	SKCM
TCGA-EE-A2GN-06A	63890	SKCM
TCGA-EE-A2GT-06A	59466	SKCM
TCGA-EE-A2M5-06A	377788	SKCM
TCGA-EE-A2MI-06A	225518	SKCM
TCGA-EE-A3J5-06A	336191	SKCM
TCGA-EE-A3JI-06A	167074	SKCM
TCGA-ER-A19D-06A	75307	SKCM
TCGA-ER-A19E-06A	71921	SKCM
TCGA-ER-A19J-06A	47155	SKCM
TCGA-ER-A19L-06A	17655	SKCM
TCGA-ER-A19T-06A	5314	SKCM
TCGA-ER-A2NF-06A	4271	SKCM
TCGA-ER-A3ES-06A	2848	SKCM
TCGA-FS-A1ZD-06A	40901	SKCM
TCGA-FS-A1ZK-06A	206968	SKCM
TCGA-FS-A1ZP-06A	93668	SKCM
TCGA-FS-A1ZU-06A	7586	SKCM
TCGA-GN-A262-06A	61923	SKCM
TCGA-GN-A264-06A	7815	SKCM
TCGA-GN-A266-06A	639064	SKCM
TCGA-GN-A26A-06A	50649	SKCM
TCGA-BJ-A0Z2-01A	2600	THCA
TCGA-BJ-A0ZB-01A	2692	THCA
TCGA-BJ-A191-01A	3072	THCA
TCGA-BJ-A28T-01A	451	THCA
TCGA-BJ-A28V-01A	2189	THCA
TCGA-DE-A0Y3-01B	1473	THCA
TCGA-DJ-A13W-01A	1677	THCA
TCGA-DJ-A1QL-01A	1632	THCA
TCGA-DJ-A2Q2-01A	950	THCA
TCGA-DJ-A3US-01A	1148	THCA
TCGA-E8-A418-01A	3169	THCA
TCGA-EL-A3CV-01A	732	THCA
TCGA-EL-A3CX-01A	862	THCA
TCGA-EL-A3H1-01A	2471	THCA
TCGA-EL-A3MY-01A	2937	THCA
TCGA-EL-A3T0-01A	738	THCA
TCGA-EL-A3TB-01A	2446	THCA
TCGA-EM-A22O-01A	2479	THCA
TCGA-EM-A2CN-01A	2262	THCA
TCGA-EM-A2CP-01A	728	THCA
TCGA-EM-A2OV-01A	1504	THCA
TCGA-EM-A2OW-01A	985	THCA
TCGA-EM-A3AL-01A	1106	THCA
TCGA-EM-A3AQ-01A	1272	THCA
TCGA-EM-A3FQ-01A	657	THCA
TCGA-EM-A3FR-01A	1191	THCA
TCGA-ET-A3DV-01A	1961	THCA
TCGA-FE-A233-01A	570	THCA
TCGA-FE-A3PD-01A	1442	THCA
TCGA-FK-A3S3-01A	1066	THCA
TCGA-FK-A3SD-01A	1407	THCA
TCGA-FK-A3SE-01A	1130	THCA
TCGA-FY-A2QD-01A	1100	THCA
TCGA-L6-A4ET-01A	815	THCA
TCGA-A5-A0G9-01A	19629	UCEC
TCGA-A5-A0GA-01A	23877	UCEC
TCGA-A5-A0GE-01A	4625	UCEC
TCGA-A5-A0GG-01A	12360	UCEC
TCGA-A5-A0GJ-01A	15525	UCEC
TCGA-AJ-A23M-01A	12101	UCEC
TCGA-AP-A051-01A	681339	UCEC
TCGA-AP-A052-01A	4688	UCEC
TCGA-AP-A053-01A	6078	UCEC
TCGA-AP-A054-01A	125137	UCEC
TCGA-AP-A05A-01A	8306	UCEC
TCGA-AP-A05D-01A	4681	UCEC
TCGA-AP-A0L8-01A	11109	UCEC
TCGA-AP-A0L9-01A	10749	UCEC
TCGA-AP-A0LD-01A	51344	UCEC
TCGA-AP-A0LE-01A	57625	UCEC
TCGA-AP-A0LF-01A	14782	UCEC
TCGA-AP-A0LH-01A	4943	UCEC
TCGA-AP-A0LI-01A	9289	UCEC
TCGA-AP-A0LL-01A	4601	UCEC
TCGA-AP-A0LO-01A	7139	UCEC
TCGA-AX-A05S-01A	40458	UCEC
TCGA-AX-A06B-01A	4707	UCEC
TCGA-AX-A0J1-01A	377697	UCEC
TCGA-AX-A1C8-01A	6230	UCEC
TCGA-AX-A1CI-01A	5023	UCEC
TCGA-AX-A2H5-01A	8591	UCEC
TCGA-B5-A0K3-01A	6102	UCEC
TCGA-B5-A11H-01A	74029	UCEC
TCGA-B5-A11I-01A	13181	UCEC
TCGA-BG-A18C-01A	7010	UCEC
TCGA-BK-A0CC-01A	7921	UCEC
TCGA-BK-A139-01A	9553	UCEC
TCGA-BS-A0TC-01A	286066	UCEC
TCGA-BS-A0TD-01A	4855	UCEC
TCGA-BS-A0TE-01A	38541	UCEC
TCGA-BS-A0TG-01A	5291	UCEC
TCGA-BS-A0U9-01B	5550	UCEC
TCGA-BS-A0V8-01A	8418	UCEC
TCGA-D1-A16G-01A	4848	UCEC
TCGA-D1-A17K-01A	6374	UCEC
TCGA-D1-A1NU-01A	12295	UCEC
TCGA-DI-A1NN-01A	5303	UCEC
TCGA-E6-A1LZ-01A	12768	UCEC
TCGA-EO-A1Y8-01A	7312	UCEC
TCGA-EY-A1GS-01A	22036	UCEC
TCGA-EY-A1GW-01A	6723	UCEC
