# Supplementary material for: Non-coding cancer driver candidates identified with a sample- and position-specific model of the somatic mutation rate
Source: eLife journal article supplement (doi:10.7554/elife.21778), 2017-03-31
Supplement: supp [file elife-21778-supp-v2.zip › elife_poa_e21778_Figure_4_figure_supplement_1_source_data_1.txt]

scoring_scheme	element_type	p	model	id
log_likelihoods	protein_coding_genes	1.39673001907218e-176	basic_model	TP53
log_likelihoods	protein_coding_genes	1.09060688332634e-33	basic_model	KRAS
log_likelihoods	protein_coding_genes	4.07215353871796e-32	basic_model	PIK3CA
log_likelihoods	protein_coding_genes	9.02508398156662e-31	basic_model	MUC4
log_likelihoods	protein_coding_genes	3.7695329339681e-24	basic_model	PTEN
log_likelihoods	protein_coding_genes	5.07742160728262e-20	basic_model	PRSS3
log_likelihoods	protein_coding_genes	1.7755351800356e-15	basic_model	BRAF
log_likelihoods	protein_coding_genes	2.74016315554112e-14	basic_model	AL390778.1
log_likelihoods	protein_coding_genes	5.06045506861219e-14	basic_model	GOLGA6L2
log_likelihoods	protein_coding_genes	5.46278213904804e-14	basic_model	FRG2B
log_likelihoods	protein_coding_genes	1.4142836331842e-11	basic_model	KRT4
log_likelihoods	protein_coding_genes	2.86469896426583e-11	basic_model	NRAS
log_likelihoods	protein_coding_genes	8.52797540607544e-11	basic_model	PLIN4
log_likelihoods	protein_coding_genes	2.46017016061478e-10	basic_model	KRTAP4-5
log_likelihoods	protein_coding_genes	5.7883290064453e-10	basic_model	KRTAP5-8
log_likelihoods	protein_coding_genes	2.64892470479258e-09	basic_model	IDH1
log_likelihoods	protein_coding_genes	3.22605858129097e-09	basic_model	KRTAP9-1
log_likelihoods	protein_coding_genes	4.47210716903654e-08	basic_model	NFE2L2
log_likelihoods	protein_coding_genes	9.04688727881987e-08	basic_model	MUC21
log_likelihoods	protein_coding_genes	2.41682203870903e-07	basic_model	AC093323.1
log_likelihoods	protein_coding_genes	2.7845668572464e-07	basic_model	BCLAF1
log_likelihoods	protein_coding_genes	4.6229046956464e-07	basic_model	PRAMEF2
log_likelihoods	protein_coding_genes	4.94478766523089e-07	basic_model	HLA-DRB1
log_likelihoods	protein_coding_genes	7.20863240698609e-07	basic_model	HLA-DQA1
log_likelihoods	protein_coding_genes	8.90497235253832e-07	basic_model	TBP
log_likelihoods	protein_coding_genes	1.38438575913644e-06	basic_model	ZNF831
log_likelihoods	protein_coding_genes	2.94515936350935e-06	basic_model	HLA-B
log_likelihoods	protein_coding_genes	3.55102843777846e-06	basic_model	DSPP
log_likelihoods	protein_coding_genes	5.99635797573517e-06	basic_model	ZNF99
log_likelihoods	protein_coding_genes	9.9198201467707e-06	basic_model	SPRR3
log_likelihoods	protein_coding_genes	1.13375760651002e-05	basic_model	SERPINB3
log_likelihoods	protein_coding_genes	1.15168793173503e-05	basic_model	PRAMEF1
log_likelihoods	protein_coding_genes	1.60439407279152e-05	basic_model	PABPC3
log_likelihoods	protein_coding_genes	2.00573268113542e-05	basic_model	PRR21
log_likelihoods	protein_coding_genes	2.08924628034646e-05	basic_model	PRSS1
log_likelihoods	protein_coding_genes	2.38528611686096e-05	basic_model	TPRXL
log_likelihoods	protein_coding_genes	2.5914212469671e-05	basic_model	TAS2R43
log_likelihoods	protein_coding_genes	2.91629942453891e-05	basic_model	IGFN1
log_likelihoods	protein_coding_genes	3.55793212462009e-05	basic_model	TAS2R31
log_likelihoods	protein_coding_genes	5.71061662905758e-05	basic_model	HLA-DQB1
log_likelihoods	protein_coding_genes	5.89066192256158e-05	basic_model	KRTAP4-7
log_likelihoods	protein_coding_genes	6.13558166531573e-05	basic_model	SPHKAP
log_likelihoods	protein_coding_genes	6.56480914186013e-05	basic_model	FBXW7
log_likelihoods	protein_coding_genes	9.17711695176056e-05	basic_model	TPSD1
log_likelihoods	protein_coding_genes	9.69921812954851e-05	basic_model	OR8U1
log_likelihoods	protein_coding_genes	9.85564395494398e-05	basic_model	EYA4
log_likelihoods	protein_coding_genes	0.000107117939000039	basic_model	CDKN2A
log_likelihoods	protein_coding_genes	0.000109284318493727	basic_model	FAM230A
log_likelihoods	protein_coding_genes	0.000118795610017831	basic_model	OR4C5
log_likelihoods	protein_coding_genes	0.000140529549154359	basic_model	MUC17
log_likelihoods	protein_coding_genes	0.000170833442060017	basic_model	HNRNPCL1
log_likelihoods	protein_coding_genes	0.000179250129360042	basic_model	AC026740.1
log_likelihoods	protein_coding_genes	0.000196315189366679	basic_model	OR8H2
log_likelihoods	protein_coding_genes	0.000208137350299189	basic_model	AL445989.1
log_likelihoods	protein_coding_genes	0.000215334341789894	basic_model	PSG2
log_likelihoods	protein_coding_genes	0.000231364007139203	basic_model	AL160286.1
log_likelihoods	protein_coding_genes	0.00023946402928761	basic_model	POM121L12
log_likelihoods	protein_coding_genes	0.00025764980863667	basic_model	TPSB2
log_likelihoods	protein_coding_genes	0.000282855121374249	basic_model	OR5F1
log_likelihoods	protein_coding_genes	0.000297928437382795	basic_model	OR4A15
log_likelihoods	protein_coding_genes	0.000301996686465159	basic_model	B2M
log_likelihoods	protein_coding_genes	0.000310375725022663	basic_model	TAS2R30
log_likelihoods	protein_coding_genes	0.000364943998568276	basic_model	CDH10
log_likelihoods	protein_coding_genes	0.000404902426890533	basic_model	NDUFV2
log_likelihoods	protein_coding_genes	0.000466029254193892	basic_model	ZNF676
log_likelihoods	protein_coding_genes	0.000470516251397481	basic_model	OR5D18
log_likelihoods	protein_coding_genes	0.000478391779895431	basic_model	AP001468.1
log_likelihoods	protein_coding_genes	0.000530391980036366	basic_model	FAM135B
log_likelihoods	protein_coding_genes	0.000607544425908248	basic_model	RP11-683L23.1
log_likelihoods	protein_coding_genes	0.000645744531288027	basic_model	ANKRD36C
log_likelihoods	protein_coding_genes	0.000771725810357121	basic_model	PSG8
log_likelihoods	protein_coding_genes	0.000894946329310732	basic_model	KCNJ15
log_likelihoods	protein_coding_genes	0.000909998643503048	basic_model	C7
log_likelihoods	protein_coding_genes	0.0012779843185073	basic_model	WASH4P
log_likelihoods	protein_coding_genes	0.00140976403821292	basic_model	IL7R
log_likelihoods	protein_coding_genes	0.00144919934133689	basic_model	CBFB
log_likelihoods	protein_coding_genes	0.00178400322372279	basic_model	AKT1
log_likelihoods	protein_coding_genes	0.00179387980008033	basic_model	CTNNB1
log_likelihoods	protein_coding_genes	0.00199538879389044	basic_model	ZNF679
log_likelihoods	protein_coding_genes	0.00201588112185603	basic_model	PABPC1
log_likelihoods	protein_coding_genes	0.0020517645421667	basic_model	NLRP4
log_likelihoods	protein_coding_genes	0.00217915694473958	basic_model	C12orf50
log_likelihoods	protein_coding_genes	0.00224615527561817	basic_model	TAS2R19
log_likelihoods	protein_coding_genes	0.0026270950539363	basic_model	TCHHL1
log_likelihoods	protein_coding_genes	0.00279162042572988	basic_model	C17orf77
log_likelihoods	protein_coding_genes	0.00279213752363993	basic_model	AC009041.2
log_likelihoods	protein_coding_genes	0.00303227106908031	basic_model	GKN2
log_likelihoods	protein_coding_genes	0.00303862170354294	basic_model	HLA-DQA2
log_likelihoods	protein_coding_genes	0.00309761805062359	basic_model	OR1F1
log_likelihoods	protein_coding_genes	0.00319508279721979	basic_model	OR2L3
log_likelihoods	protein_coding_genes	0.00330640172264467	basic_model	DEFB114
log_likelihoods	protein_coding_genes	0.0036094931437088	basic_model	MEI4
log_likelihoods	protein_coding_genes	0.00390865021862305	basic_model	DHRS7C
log_likelihoods	protein_coding_genes	0.00411204277961165	basic_model	ZNF208
log_likelihoods	protein_coding_genes	0.00417947087679083	basic_model	OR2J2
log_likelihoods	protein_coding_genes	0.00427145802765952	basic_model	GLP2R
log_likelihoods	protein_coding_genes	0.0045142226079429	basic_model	VHL
log_likelihoods	protein_coding_genes	0.00457759806470551	basic_model	CTSG
log_likelihoods	protein_coding_genes	0.00474302568625488	basic_model	FCN2
log_likelihoods	protein_coding_genes	0.00511740281429307	basic_model	TMEM78
log_likelihoods	protein_coding_genes	0.00531396671220986	basic_model	IL36B
log_likelihoods	protein_coding_genes	0.00534347565996194	basic_model	OR5H15
log_likelihoods	protein_coding_genes	0.00551363717104434	basic_model	C12orf36
log_likelihoods	protein_coding_genes	0.00579846486088334	basic_model	AC009403.2
log_likelihoods	protein_coding_genes	0.00587816734861001	basic_model	EEF1A1
log_likelihoods	protein_coding_genes	0.0058858505937095	basic_model	OR4X2
log_likelihoods	protein_coding_genes	0.00594830130653699	basic_model	POU5F1B
log_likelihoods	protein_coding_genes	0.00631790261101557	basic_model	DCD
log_likelihoods	protein_coding_genes	0.00655271000837297	basic_model	IL10
log_likelihoods	protein_coding_genes	0.0065744383683261	basic_model	OR2T4
log_likelihoods	protein_coding_genes	0.00661164332095366	basic_model	DCAF4L2
log_likelihoods	protein_coding_genes	0.00676933333857106	basic_model	OR4P4
log_likelihoods	protein_coding_genes	0.00687067786421483	basic_model	AL596220.1
log_likelihoods	protein_coding_genes	0.00697216429992957	basic_model	AC109583.1
log_likelihoods	protein_coding_genes	0.00698992621286971	basic_model	RP11-830F9.6
log_likelihoods	protein_coding_genes	0.00705536268950301	basic_model	ARFGAP1
log_likelihoods	protein_coding_genes	0.00717398960867172	basic_model	TGM4
log_likelihoods	protein_coding_genes	0.00725729068674968	basic_model	FAM27A
log_likelihoods	protein_coding_genes	0.00730324827022163	basic_model	NLRP9
log_likelihoods	protein_coding_genes	0.00732774869348333	basic_model	TEX12
log_likelihoods	protein_coding_genes	0.00751106981593282	basic_model	OR2G6
log_likelihoods	protein_coding_genes	0.0080413803992057	basic_model	KRTAP9-2
log_likelihoods	protein_coding_genes	0.0080922643527161	basic_model	SLC35G3
log_likelihoods	protein_coding_genes	0.00834092499494513	basic_model	APLNR
log_likelihoods	protein_coding_genes	0.00834934353728711	basic_model	KRTAP19-5
log_likelihoods	protein_coding_genes	0.00868217107632282	basic_model	KRTAP1-3
log_likelihoods	protein_coding_genes	0.00912133612569698	basic_model	MARCO
log_likelihoods	protein_coding_genes	0.00915688070740345	basic_model	NPAS4
log_likelihoods	protein_coding_genes	0.00935811434490079	basic_model	OR6A2
log_likelihoods	protein_coding_genes	0.0096968504264201	basic_model	NANOGNB
log_likelihoods	protein_coding_genes	0.00976226688365403	basic_model	ADAM7
log_likelihoods	protein_coding_genes	0.0100276371142488	basic_model	GXYLT1
log_likelihoods	protein_coding_genes	0.0102651798321719	basic_model	OR4D2
log_likelihoods	protein_coding_genes	0.0103231368859575	basic_model	PSG5
log_likelihoods	protein_coding_genes	0.0103502114232076	basic_model	CYP1A2
log_likelihoods	protein_coding_genes	0.0104697961780848	basic_model	ACTC1
log_likelihoods	protein_coding_genes	0.0104819960479778	basic_model	OR5W2
log_likelihoods	protein_coding_genes	0.0106608160775092	basic_model	CIB3
log_likelihoods	protein_coding_genes	0.0109292059320948	basic_model	VAV1
log_likelihoods	protein_coding_genes	0.0110344934900086	basic_model	NEFH
log_likelihoods	protein_coding_genes	0.0110930295287138	basic_model	SIGLECL1
log_likelihoods	protein_coding_genes	0.0112032197083136	basic_model	ACTB
log_likelihoods	protein_coding_genes	0.0113648828661258	basic_model	FRG1
log_likelihoods	protein_coding_genes	0.0114466749815277	basic_model	C14orf177
log_likelihoods	protein_coding_genes	0.011660135011616	basic_model	LCE1F
log_likelihoods	protein_coding_genes	0.0118024210159903	basic_model	ODF1
log_likelihoods	protein_coding_genes	0.0119820094192393	basic_model	USP6
log_likelihoods	protein_coding_genes	0.0119921087908952	basic_model	OR4A16
log_likelihoods	protein_coding_genes	0.0122072987981066	basic_model	OR4C3
log_likelihoods	protein_coding_genes	0.0123341068943232	basic_model	KRTAP4-8
log_likelihoods	protein_coding_genes	0.0125724544844138	basic_model	ANKRD45
log_likelihoods	protein_coding_genes	0.0128492753922996	basic_model	LGSN
log_likelihoods	protein_coding_genes	0.0128635393086555	basic_model	SLC38A1
log_likelihoods	protein_coding_genes	0.0137239280490551	basic_model	GPRC6A
log_likelihoods	protein_coding_genes	0.0138100875400143	basic_model	OR6C1
log_likelihoods	protein_coding_genes	0.0138787975352415	basic_model	DSG3
log_likelihoods	protein_coding_genes	0.0141492505387328	basic_model	CLLU1OS
log_likelihoods	protein_coding_genes	0.0146052901515465	basic_model	SLC30A8
log_likelihoods	protein_coding_genes	0.0146557037184667	basic_model	AARD
log_likelihoods	protein_coding_genes	0.0147620626789963	basic_model	IL37
log_likelihoods	protein_coding_genes	0.0147653340100055	basic_model	ARMC4
log_likelihoods	protein_coding_genes	0.0149648695655405	basic_model	AMER3
log_likelihoods	protein_coding_genes	0.015214375535526	basic_model	PAK2
log_likelihoods	protein_coding_genes	0.015392244116547	basic_model	KRTAP5-10
log_likelihoods	protein_coding_genes	0.0158840214324954	basic_model	EGFR
log_likelihoods	protein_coding_genes	0.0158906279194468	basic_model	PSG6
log_likelihoods	protein_coding_genes	0.0164016897041278	basic_model	GYPB
log_likelihoods	protein_coding_genes	0.0166452363234856	basic_model	NT5DC4
log_likelihoods	protein_coding_genes	0.016950578711866	basic_model	ADIG
log_likelihoods	protein_coding_genes	0.0170714916253987	basic_model	ACOT4
log_likelihoods	protein_coding_genes	0.0171858407737675	basic_model	WFDC10A
log_likelihoods	protein_coding_genes	0.017246962619284	basic_model	OR5AK2
log_likelihoods	protein_coding_genes	0.0172908886693354	basic_model	UGT1A4
log_likelihoods	protein_coding_genes	0.0174213333958195	basic_model	TAS2R60
log_likelihoods	protein_coding_genes	0.0177702710199743	basic_model	PSG11
log_likelihoods	protein_coding_genes	0.0179144003032695	basic_model	CDH12
log_likelihoods	protein_coding_genes	0.0181210521843465	basic_model	RFPL4AL1
log_likelihoods	protein_coding_genes	0.0183129583195304	basic_model	PI3
log_likelihoods	protein_coding_genes	0.0185369298695484	basic_model	TRIM51
log_likelihoods	protein_coding_genes	0.0186121722644815	basic_model	BRINP3
log_likelihoods	protein_coding_genes	0.0186846395058165	basic_model	RP11-723O4.6
log_likelihoods	protein_coding_genes	0.0188937734509927	basic_model	ZNF705A
log_likelihoods	protein_coding_genes	0.018905410760494	basic_model	PCDHA7
log_likelihoods	protein_coding_genes	0.0191065176078501	basic_model	DCDC2C
log_likelihoods	protein_coding_genes	0.0192384621160312	basic_model	KRTAP4-11
log_likelihoods	protein_coding_genes	0.0192682574904452	basic_model	CRYGC
log_likelihoods	protein_coding_genes	0.019487945971334	basic_model	RP11-712L6.5
log_likelihoods	protein_coding_genes	0.0194924561475758	basic_model	ASB17
log_likelihoods	protein_coding_genes	0.0196343645744179	basic_model	POLDIP2
log_likelihoods	protein_coding_genes	0.0196356555604519	basic_model	CTB-78H18.1
log_likelihoods	protein_coding_genes	0.0196990871751057	basic_model	HLA-DRB5
log_likelihoods	protein_coding_genes	0.0198232558354393	basic_model	ANP32D
log_likelihoods	protein_coding_genes	0.0198935150570958	basic_model	RP11-89K11.1
log_likelihoods	protein_coding_genes	0.0199534324869358	basic_model	MARCH10
log_likelihoods	protein_coding_genes	0.0204428940424959	basic_model	TPTE
log_likelihoods	protein_coding_genes	0.0206494741026783	basic_model	PLG
log_likelihoods	protein_coding_genes	0.0208628641225527	basic_model	OR2Z1
log_likelihoods	protein_coding_genes	0.0209187736506053	basic_model	PRR23B
log_likelihoods	protein_coding_genes	0.0209332907594968	basic_model	SPIN1
log_likelihoods	protein_coding_genes	0.0211328595094319	basic_model	OR56B3P
log_likelihoods	protein_coding_genes	0.0212370790331437	basic_model	OPRL1
log_likelihoods	protein_coding_genes	0.0219166098265066	basic_model	OR4C46
log_likelihoods	protein_coding_genes	0.0221491849889098	basic_model	CR2
log_likelihoods	protein_coding_genes	0.0223045370017089	basic_model	TPSAB1
log_likelihoods	protein_coding_genes	0.0223146668903269	basic_model	OR2A5
log_likelihoods	protein_coding_genes	0.0223940671107871	basic_model	BCHE
log_likelihoods	protein_coding_genes	0.022397561134593	basic_model	NLRP11
log_likelihoods	protein_coding_genes	0.0226117979384038	basic_model	GSTA1
log_likelihoods	protein_coding_genes	0.0228319086927142	basic_model	OR4D6
log_likelihoods	protein_coding_genes	0.0232117978402609	basic_model	OR6F1
log_likelihoods	protein_coding_genes	0.0232784792328546	basic_model	ZNF727
log_likelihoods	protein_coding_genes	0.0233975169270022	basic_model	SERPINB11
log_likelihoods	protein_coding_genes	0.0234441628438042	basic_model	TMEM132C
log_likelihoods	protein_coding_genes	0.0238514917262642	basic_model	HRAS
log_likelihoods	protein_coding_genes	0.0238568069006742	basic_model	ADIRF
log_likelihoods	protein_coding_genes	0.0240609947864016	basic_model	UGT1A3
log_likelihoods	protein_coding_genes	0.0240792861102825	basic_model	KRTAP10-10
log_likelihoods	protein_coding_genes	0.0241156079463008	basic_model	ULBP1
log_likelihoods	protein_coding_genes	0.0244348138196372	basic_model	PIH1
log_likelihoods	protein_coding_genes	0.0247742664953508	basic_model	ZNF716
log_likelihoods	protein_coding_genes	0.02479856175165	basic_model	KIR3DX1
log_likelihoods	protein_coding_genes	0.024975938008406	basic_model	OR5M11
log_likelihoods	protein_coding_genes	0.0249922282749222	basic_model	PTPN11
log_likelihoods	protein_coding_genes	0.0251228656122669	basic_model	STK31
log_likelihoods	protein_coding_genes	0.0254797985736933	basic_model	PRDM9
log_likelihoods	protein_coding_genes	0.0256166182615272	basic_model	CNIH1
log_likelihoods	protein_coding_genes	0.0257363827548069	basic_model	ZNF729
log_likelihoods	protein_coding_genes	0.0257598237306357	basic_model	AMPD1
log_likelihoods	protein_coding_genes	0.0259741201222087	basic_model	FAM177B
log_likelihoods	protein_coding_genes	0.0260403173749511	basic_model	GABRA2
log_likelihoods	protein_coding_genes	0.0260432486759461	basic_model	CRB1
log_likelihoods	protein_coding_genes	0.0261758620737452	basic_model	TCTE1
log_likelihoods	protein_coding_genes	0.0265157852002291	basic_model	LY96
log_likelihoods	protein_coding_genes	0.0268925158868163	basic_model	OR2AP1
log_likelihoods	protein_coding_genes	0.0272210681862352	basic_model	GPRIN2
log_likelihoods	protein_coding_genes	0.0274281285604782	basic_model	UGT2B10
log_likelihoods	protein_coding_genes	0.0275009781673703	basic_model	CYP2E1
log_likelihoods	protein_coding_genes	0.0276043874415772	basic_model	AL645608.2
log_likelihoods	protein_coding_genes	0.0276870964731269	basic_model	C1orf127
log_likelihoods	protein_coding_genes	0.0277215854026138	basic_model	CDKN1B
log_likelihoods	protein_coding_genes	0.0279078785825618	basic_model	BAD
log_likelihoods	protein_coding_genes	0.0281153761790812	basic_model	NLRP2
log_likelihoods	protein_coding_genes	0.0281733692527114	basic_model	FGF6
log_likelihoods	protein_coding_genes	0.0290002297514731	basic_model	SFTPA1
log_likelihoods	protein_coding_genes	0.0293033101846569	basic_model	MS4A4E
log_likelihoods	protein_coding_genes	0.0293329704271931	basic_model	GPC5
log_likelihoods	protein_coding_genes	0.0296439661342514	basic_model	IQCF3
log_likelihoods	protein_coding_genes	0.029828677123708	basic_model	C12orf43
log_likelihoods	protein_coding_genes	0.0299843957034661	basic_model	GDF5
log_likelihoods	protein_coding_genes	0.0302056891212359	basic_model	ZNF597
log_likelihoods	protein_coding_genes	0.0304384483639125	basic_model	RAC1
log_likelihoods	protein_coding_genes	0.0310193634133226	basic_model	SLC9B1
log_likelihoods	protein_coding_genes	0.0310902135825143	basic_model	LRRC43
log_likelihoods	protein_coding_genes	0.031237941940928	basic_model	KRTAP4-3
log_likelihoods	protein_coding_genes	0.0314494253189902	basic_model	BCL2L11
log_likelihoods	protein_coding_genes	0.032398795804393	basic_model	ACVR1B
log_likelihoods	protein_coding_genes	0.0326327898486161	basic_model	DAW1
log_likelihoods	protein_coding_genes	0.032786082485887	basic_model	SLC35G5
log_likelihoods	protein_coding_genes	0.0328671421644366	basic_model	TNP2
log_likelihoods	protein_coding_genes	0.0329164549178355	basic_model	PLVAP
log_likelihoods	protein_coding_genes	0.0332215169763883	basic_model	NACAD
log_likelihoods	protein_coding_genes	0.0334134004807823	basic_model	PRAMEF4
log_likelihoods	protein_coding_genes	0.0334633913916686	basic_model	TRAT1
log_likelihoods	protein_coding_genes	0.0337870974449329	basic_model	AC003043.1
log_likelihoods	protein_coding_genes	0.0342844417581228	basic_model	ZNF821
log_likelihoods	protein_coding_genes	0.0342865698528125	basic_model	TRIQK
log_likelihoods	protein_coding_genes	0.0344320122499137	basic_model	FAM209B
log_likelihoods	protein_coding_genes	0.0347130786540199	basic_model	KRTAP3-3
log_likelihoods	protein_coding_genes	0.0355067811598522	basic_model	XIRP2
log_likelihoods	protein_coding_genes	0.0362129250334609	basic_model	GALNT6
log_likelihoods	protein_coding_genes	0.0368088490703207	basic_model	FAM27E2
log_likelihoods	protein_coding_genes	0.0368928948506904	basic_model	TRIML2
log_likelihoods	protein_coding_genes	0.0370762030826587	basic_model	COL15A1
log_likelihoods	protein_coding_genes	0.0371803886771996	basic_model	PRKCB
log_likelihoods	protein_coding_genes	0.0372737407324218	basic_model	FAM131B
log_likelihoods	protein_coding_genes	0.0376351698840455	basic_model	GP9
log_likelihoods	protein_coding_genes	0.0376495588193955	basic_model	GSTA5
log_likelihoods	protein_coding_genes	0.0377774001246506	basic_model	RNF212
log_likelihoods	protein_coding_genes	0.0378424066439412	basic_model	SLC2A3
log_likelihoods	protein_coding_genes	0.0382930940619695	basic_model	UBXN11
log_likelihoods	protein_coding_genes	0.0383454194865496	basic_model	SOCS4
log_likelihoods	protein_coding_genes	0.0384330367045261	basic_model	RTP2
log_likelihoods	protein_coding_genes	0.0385191509389965	basic_model	EGFLAM
log_likelihoods	protein_coding_genes	0.0388180802556205	basic_model	AHNAK2
log_likelihoods	protein_coding_genes	0.0391182023970786	basic_model	FAM65C
log_likelihoods	protein_coding_genes	0.0393706010058636	basic_model	FAM71F1
log_likelihoods	protein_coding_genes	0.0395345098823132	basic_model	CHCHD10
log_likelihoods	protein_coding_genes	0.0398687574474453	basic_model	OR1L1
log_likelihoods	protein_coding_genes	0.0400719983750494	basic_model	CCL7
log_likelihoods	protein_coding_genes	0.0401534122586102	basic_model	REG3A
log_likelihoods	protein_coding_genes	0.0402055108063239	basic_model	VSTM1
log_likelihoods	protein_coding_genes	0.0402456382734199	basic_model	OR6C2
log_likelihoods	protein_coding_genes	0.0403127085129051	basic_model	OR52E4
log_likelihoods	protein_coding_genes	0.0409219459024438	basic_model	ROPN1L
log_likelihoods	protein_coding_genes	0.0409656503740229	basic_model	KRTAP5-4
log_likelihoods	protein_coding_genes	0.0414857125806918	basic_model	APC
log_likelihoods	protein_coding_genes	0.0416306080356152	basic_model	OR2C3
log_likelihoods	protein_coding_genes	0.0418069388091818	basic_model	CRIPAK
log_likelihoods	protein_coding_genes	0.0418468803968383	basic_model	OR4N2
log_likelihoods	protein_coding_genes	0.0419016190608982	basic_model	TRIM77
log_likelihoods	protein_coding_genes	0.0424504592149727	basic_model	LRRC20
log_likelihoods	protein_coding_genes	0.0424537675668223	basic_model	TNFSF8
log_likelihoods	protein_coding_genes	0.0436702029988871	basic_model	C13orf45
log_likelihoods	protein_coding_genes	0.0437401761542845	basic_model	RP11-113D6.10
log_likelihoods	protein_coding_genes	0.0438314940952473	basic_model	OR8H1
log_likelihoods	protein_coding_genes	0.0438327712530268	basic_model	CTC-512J12.6
log_likelihoods	protein_coding_genes	0.0440139825319862	basic_model	C4BPA
log_likelihoods	protein_coding_genes	0.0440617820514816	basic_model	NBPF14
log_likelihoods	protein_coding_genes	0.0441688038490411	basic_model	S100A14
log_likelihoods	protein_coding_genes	0.0442454610111925	basic_model	OR52N4
log_likelihoods	protein_coding_genes	0.0452326010046654	basic_model	OR4C15
log_likelihoods	protein_coding_genes	0.0453637129070367	basic_model	CYP4B1
log_likelihoods	protein_coding_genes	0.0458077948397301	basic_model	UGT1A7
log_likelihoods	protein_coding_genes	0.0460483548659808	basic_model	TMEM222
log_likelihoods	protein_coding_genes	0.0461468444329245	basic_model	NXPH2
log_likelihoods	protein_coding_genes	0.04634610362203	basic_model	SLC22A16
log_likelihoods	protein_coding_genes	0.046416534448603	basic_model	HAPLN1
log_likelihoods	protein_coding_genes	0.0467480806779496	basic_model	GLYAT
log_likelihoods	protein_coding_genes	0.0467892294197636	basic_model	KLF17
log_likelihoods	protein_coding_genes	0.0473151976953365	basic_model	CLEC4D
log_likelihoods	protein_coding_genes	0.0474281430780122	basic_model	INHA
log_likelihoods	protein_coding_genes	0.0476313901754907	basic_model	CATX-2
log_likelihoods	protein_coding_genes	0.047805572507446	basic_model	GK2
log_likelihoods	protein_coding_genes	0.0481264594725222	basic_model	GML
log_likelihoods	protein_coding_genes	0.0481819253208982	basic_model	LILRA6
log_likelihoods	protein_coding_genes	0.0482158778663817	basic_model	ANKRD35
log_likelihoods	protein_coding_genes	0.0491378310310466	basic_model	PDYN
log_likelihoods	protein_coding_genes	0.0494161280765275	basic_model	UQCRH
log_likelihoods	protein_coding_genes	0.0497950948476462	basic_model	POLR2D
log_likelihoods	protein_coding_genes	0.0503773076753544	basic_model	OR2T33
log_likelihoods	protein_coding_genes	0.0506443588782952	basic_model	IL10RB
log_likelihoods	protein_coding_genes	0.0511854141431753	basic_model	ZP3
log_likelihoods	protein_coding_genes	0.0515966621984235	basic_model	CNTNAP5
log_likelihoods	protein_coding_genes	0.0518073131393006	basic_model	SPINT2
log_likelihoods	protein_coding_genes	0.0519656439173503	basic_model	MYL6
log_likelihoods	protein_coding_genes	0.0522699916070142	basic_model	WISP1
log_likelihoods	protein_coding_genes	0.0523445946858381	basic_model	HARBI1
log_likelihoods	protein_coding_genes	0.0524102908714594	basic_model	FUT9
log_likelihoods	protein_coding_genes	0.0524802544993361	basic_model	S100A9
log_likelihoods	protein_coding_genes	0.0528322290921777	basic_model	C5orf17
log_likelihoods	protein_coding_genes	0.0529141852100741	basic_model	DSG4
log_likelihoods	protein_coding_genes	0.0530916383441899	basic_model	DCAF4L1
log_likelihoods	protein_coding_genes	0.0531838855328519	basic_model	SCGB1D1
log_likelihoods	protein_coding_genes	0.0532718888306601	basic_model	KRTAP19-7
log_likelihoods	protein_coding_genes	0.0534503758924843	basic_model	PCED1B
log_likelihoods	protein_coding_genes	0.0535408171654375	basic_model	KIAA1644
log_likelihoods	protein_coding_genes	0.0535605166068342	basic_model	SYNGR1
log_likelihoods	protein_coding_genes	0.0538401228925531	basic_model	TP63
log_likelihoods	protein_coding_genes	0.0541405817277104	basic_model	AXDND1
log_likelihoods	protein_coding_genes	0.0543007969055912	basic_model	MROH2B
log_likelihoods	protein_coding_genes	0.0545045981796788	basic_model	PPP6C
log_likelihoods	protein_coding_genes	0.054506024689719	basic_model	OR8S1
log_likelihoods	protein_coding_genes	0.0548219028781254	basic_model	CRYGN
log_likelihoods	protein_coding_genes	0.0550073137076069	basic_model	SCAND3
log_likelihoods	protein_coding_genes	0.0550290041528284	basic_model	IFNA14
log_likelihoods	protein_coding_genes	0.0552103484655756	basic_model	KRT82
log_likelihoods	protein_coding_genes	0.057118961087209	basic_model	BRDT
log_likelihoods	protein_coding_genes	0.0572474209681621	basic_model	MYLK2
log_likelihoods	protein_coding_genes	0.0582994991996405	basic_model	NEUROD4
log_likelihoods	protein_coding_genes	0.0583882213393702	basic_model	CISD3
log_likelihoods	protein_coding_genes	0.058769536510438	basic_model	PPP1R9A
log_likelihoods	protein_coding_genes	0.0588191057775065	basic_model	AC096644.1
log_likelihoods	protein_coding_genes	0.0592437742341068	basic_model	AC012485.1
log_likelihoods	protein_coding_genes	0.0593632403363567	basic_model	PDE1A
log_likelihoods	protein_coding_genes	0.0598657721831494	basic_model	RP11-167N24.6
log_likelihoods	protein_coding_genes	0.059934567448518	basic_model	OR5J2
log_likelihoods	protein_coding_genes	0.0599698422471705	basic_model	USMG5
log_likelihoods	protein_coding_genes	0.0603528378564421	basic_model	RFPL2
log_likelihoods	protein_coding_genes	0.0604793318893502	basic_model	CRYBA4
log_likelihoods	protein_coding_genes	0.0608048919810804	basic_model	SPATS1
log_likelihoods	protein_coding_genes	0.0609015305512517	basic_model	BIK
log_likelihoods	protein_coding_genes	0.0613682940190665	basic_model	SYNGR4
log_likelihoods	protein_coding_genes	0.061440185535212	basic_model	MRPL35
log_likelihoods	protein_coding_genes	0.0614765041400299	basic_model	NCR1
log_likelihoods	protein_coding_genes	0.0614791039548417	basic_model	CALML5
log_likelihoods	protein_coding_genes	0.0619493236621415	basic_model	KRTAP15-1
log_likelihoods	protein_coding_genes	0.0623365424039133	basic_model	SIRPA
log_likelihoods	protein_coding_genes	0.062581419012756	basic_model	VIP
log_likelihoods	protein_coding_genes	0.0626623309049702	basic_model	WBSCR17
log_likelihoods	protein_coding_genes	0.0630030394872379	basic_model	PRODH2
log_likelihoods	protein_coding_genes	0.0631447743593213	basic_model	GNG8
log_likelihoods	protein_coding_genes	0.0633707892801236	basic_model	MGC10955
log_likelihoods	protein_coding_genes	0.0634593941109294	basic_model	IFNL3
log_likelihoods	protein_coding_genes	0.0634972443039676	basic_model	PTH2R
log_likelihoods	protein_coding_genes	0.0634978488882809	basic_model	OR14A2
log_likelihoods	protein_coding_genes	0.0635908383571038	basic_model	ALLC
log_likelihoods	protein_coding_genes	0.0638548826531556	basic_model	LRRIQ3
log_likelihoods	protein_coding_genes	0.0639079586841955	basic_model	TCTEX1D1
log_likelihoods	protein_coding_genes	0.0642288922620781	basic_model	LMOD3
log_likelihoods	protein_coding_genes	0.0643614791374382	basic_model	S100A7
log_likelihoods	protein_coding_genes	0.0644816351376429	basic_model	PSCA
log_likelihoods	protein_coding_genes	0.0645927951413331	basic_model	OR2M3
log_likelihoods	protein_coding_genes	0.0646427676129729	basic_model	TRPC4
log_likelihoods	protein_coding_genes	0.0647980291141018	basic_model	SRSF3
log_likelihoods	protein_coding_genes	0.0651665191327363	basic_model	MDP1
log_likelihoods	protein_coding_genes	0.0651691151282708	basic_model	C7orf69
log_likelihoods	protein_coding_genes	0.0652371362448626	basic_model	AL139080.1
log_likelihoods	protein_coding_genes	0.0652960570909651	basic_model	KNSTRN
log_likelihoods	protein_coding_genes	0.0655558869798355	basic_model	CDKN1A
log_likelihoods	protein_coding_genes	0.0657970936629116	basic_model	OR5T1
log_likelihoods	protein_coding_genes	0.0659752512651609	basic_model	UGT1A6
log_likelihoods	protein_coding_genes	0.0660448270026711	basic_model	HGF
log_likelihoods	protein_coding_genes	0.0663938805038141	basic_model	PRKCG
log_likelihoods	protein_coding_genes	0.067375505171786	basic_model	CDH9
log_likelihoods	protein_coding_genes	0.0679461147693629	basic_model	VAMP8
log_likelihoods	protein_coding_genes	0.0688827793071319	basic_model	KCNA10
log_likelihoods	protein_coding_genes	0.0689153081238148	basic_model	LEUTX
log_likelihoods	protein_coding_genes	0.0696363645450985	basic_model	ABHD3
log_likelihoods	protein_coding_genes	0.0697827637392807	basic_model	MTRNR2L4
log_likelihoods	protein_coding_genes	0.0698215415805422	basic_model	BNIP3L
log_likelihoods	protein_coding_genes	0.0704916254194404	basic_model	AL646016.1
log_likelihoods	protein_coding_genes	0.0705464045298833	basic_model	AC091948.1
log_likelihoods	protein_coding_genes	0.0706693999357889	basic_model	AQP7
log_likelihoods	protein_coding_genes	0.0708038305607631	basic_model	AL645922.1
log_likelihoods	protein_coding_genes	0.0709167476553946	basic_model	STEAP1B
log_likelihoods	protein_coding_genes	0.0709231390041003	basic_model	OR5T3
log_likelihoods	protein_coding_genes	0.0710773143388935	basic_model	GTSF1
log_likelihoods	protein_coding_genes	0.0714372455556334	basic_model	DUSP27
log_likelihoods	protein_coding_genes	0.0714383596615229	basic_model	LNP1
log_likelihoods	protein_coding_genes	0.0720824053963123	basic_model	OR5H1
log_likelihoods	protein_coding_genes	0.0722475644339799	basic_model	HMSD
log_likelihoods	protein_coding_genes	0.0725767255254661	basic_model	OR6C75
log_likelihoods	protein_coding_genes	0.0725940559327805	basic_model	STK11
log_likelihoods	protein_coding_genes	0.072708786100205	basic_model	RP11-867G23.8
log_likelihoods	protein_coding_genes	0.0728200530733756	basic_model	CTB-58E17.5
log_likelihoods	protein_coding_genes	0.07287287422327	basic_model	PRAMEF11
log_likelihoods	protein_coding_genes	0.0732855177553009	basic_model	CYP26B1
log_likelihoods	protein_coding_genes	0.073550154501628	basic_model	SPAM1
log_likelihoods	protein_coding_genes	0.0737532548136089	basic_model	CORO2A
log_likelihoods	protein_coding_genes	0.0738122014957082	basic_model	PRED58
log_likelihoods	protein_coding_genes	0.0740276107397953	basic_model	CATSPERD
log_likelihoods	protein_coding_genes	0.0741575768875381	basic_model	NLRP8
log_likelihoods	protein_coding_genes	0.0742070305562944	basic_model	RP11-477N12.3
log_likelihoods	protein_coding_genes	0.0747030386652922	basic_model	OR5K4
log_likelihoods	protein_coding_genes	0.0747875903120198	basic_model	DDR2
log_likelihoods	protein_coding_genes	0.0749747582603559	basic_model	EFEMP1
log_likelihoods	protein_coding_genes	0.0751920441629349	basic_model	LY6G6C
log_likelihoods	protein_coding_genes	0.0751950876910928	basic_model	PSD2
log_likelihoods	protein_coding_genes	0.0753209617668366	basic_model	ZNF101
log_likelihoods	protein_coding_genes	0.075351230621331	basic_model	AC013449.1
log_likelihoods	protein_coding_genes	0.0754542883558889	basic_model	GJC1
log_likelihoods	protein_coding_genes	0.0755010423304847	basic_model	REG1A
log_likelihoods	protein_coding_genes	0.0765087073507533	basic_model	CLEC4C
log_likelihoods	protein_coding_genes	0.0769351976694105	basic_model	OR1A1
log_likelihoods	protein_coding_genes	0.0769996472439678	basic_model	ACOX3
log_likelihoods	protein_coding_genes	0.0770263692835247	basic_model	MTNR1B
log_likelihoods	protein_coding_genes	0.0780711645605398	basic_model	SRGAP1
log_likelihoods	protein_coding_genes	0.0783349559370033	basic_model	LELP1
log_likelihoods	protein_coding_genes	0.0783629492017251	basic_model	NKG2-E
log_likelihoods	protein_coding_genes	0.0785919183761391	basic_model	RP11-738G5.2
log_likelihoods	protein_coding_genes	0.0786029663826879	basic_model	KEAP1
log_likelihoods	protein_coding_genes	0.078815360708977	basic_model	HIST1H2BA
log_likelihoods	protein_coding_genes	0.0788433683432886	basic_model	BARX2
log_likelihoods	protein_coding_genes	0.0791109282408354	basic_model	C16orf45
log_likelihoods	protein_coding_genes	0.0791411816232849	basic_model	KRT8
log_likelihoods	protein_coding_genes	0.0793302635956935	basic_model	C8B
log_likelihoods	protein_coding_genes	0.0794149120562617	basic_model	ANKRD62
log_likelihoods	protein_coding_genes	0.0799337926410614	basic_model	TCP11L2
log_likelihoods	protein_coding_genes	0.0800662758271038	basic_model	CD300A
log_likelihoods	protein_coding_genes	0.0802877627006824	basic_model	PLSCR4
log_likelihoods	protein_coding_genes	0.0803580050199262	basic_model	HNRNPA1
log_likelihoods	protein_coding_genes	0.0804728837703005	basic_model	C12orf65
log_likelihoods	protein_coding_genes	0.0805305707925881	basic_model	EDEM2
log_likelihoods	protein_coding_genes	0.0805749587495622	basic_model	FOXR1
log_likelihoods	protein_coding_genes	0.080674041031995	basic_model	IRGC
log_likelihoods	protein_coding_genes	0.0812301637731405	basic_model	TEX30
log_likelihoods	protein_coding_genes	0.0813047501556402	basic_model	ABCB5
log_likelihoods	protein_coding_genes	0.0817499010208276	basic_model	RD3L
log_likelihoods	protein_coding_genes	0.0820523595118048	basic_model	SSFA2
log_likelihoods	protein_coding_genes	0.0821006526407366	basic_model	LINC00955
log_likelihoods	protein_coding_genes	0.0822179385137138	basic_model	OTOS
log_likelihoods	protein_coding_genes	0.0823850249600507	basic_model	NEK5
log_likelihoods	protein_coding_genes	0.0824939582443559	basic_model	ZG16B
log_likelihoods	protein_coding_genes	0.0826325688554734	basic_model	KIAA0125
log_likelihoods	protein_coding_genes	0.0826521163192182	basic_model	HEPACAM2
log_likelihoods	protein_coding_genes	0.0826591867342015	basic_model	TMEM69
log_likelihoods	protein_coding_genes	0.0828864480935583	basic_model	SLC35E4
log_likelihoods	protein_coding_genes	0.0831701473281766	basic_model	ANKRD30BL
log_likelihoods	protein_coding_genes	0.0832417398316601	basic_model	AC078925.1
log_likelihoods	protein_coding_genes	0.0834426727464415	basic_model	OR5AS1
log_likelihoods	protein_coding_genes	0.0836670200623332	basic_model	LRRC7
log_likelihoods	protein_coding_genes	0.0836901527521481	basic_model	RBMXL1
log_likelihoods	protein_coding_genes	0.0837531361979789	basic_model	GRPEL2
log_likelihoods	protein_coding_genes	0.0842554494182538	basic_model	CACNG3
log_likelihoods	protein_coding_genes	0.0844952502072011	basic_model	FCRL6
log_likelihoods	protein_coding_genes	0.0845530219743001	basic_model	ANKUB1
log_likelihoods	protein_coding_genes	0.0850261762570372	basic_model	ASB5
log_likelihoods	protein_coding_genes	0.0851902615245609	basic_model	LY6K
log_likelihoods	protein_coding_genes	0.0852606943351742	basic_model	PYGO1
log_likelihoods	protein_coding_genes	0.0854840139505132	basic_model	MESP2
log_likelihoods	protein_coding_genes	0.0855030374126981	basic_model	RPL8
log_likelihoods	protein_coding_genes	0.0862111996216703	basic_model	MUC8
log_likelihoods	protein_coding_genes	0.0863416467730361	basic_model	RPL41
log_likelihoods	protein_coding_genes	0.0864707868476405	basic_model	TOX2
log_likelihoods	protein_coding_genes	0.0867224121298613	basic_model	MSANTD3
log_likelihoods	protein_coding_genes	0.0868184998067636	basic_model	C6orf118
log_likelihoods	protein_coding_genes	0.0868371384011001	basic_model	C16orf3
log_likelihoods	protein_coding_genes	0.0881522276821792	basic_model	AC018867.1
log_likelihoods	protein_coding_genes	0.0884388473380065	basic_model	HOPX
log_likelihoods	protein_coding_genes	0.0885431441999651	basic_model	AFP
log_likelihoods	protein_coding_genes	0.0888151667233145	basic_model	CDKN2C
log_likelihoods	protein_coding_genes	0.0893066304515971	basic_model	SKAP1
log_likelihoods	protein_coding_genes	0.0894478139057246	basic_model	AKR1D1
log_likelihoods	protein_coding_genes	0.0902138627669916	basic_model	DDI1
log_likelihoods	protein_coding_genes	0.0902377272512647	basic_model	SLC9C2
log_likelihoods	protein_coding_genes	0.09060826696273	basic_model	AC110084.1
log_likelihoods	protein_coding_genes	0.0906765572226959	basic_model	OR10A4
log_likelihoods	protein_coding_genes	0.0907231598778547	basic_model	CD9
log_likelihoods	protein_coding_genes	0.0911100952410868	basic_model	ACP5
log_likelihoods	protein_coding_genes	0.0914368176967716	basic_model	THEMIS
log_likelihoods	protein_coding_genes	0.0915375132099271	basic_model	SDIM1
log_likelihoods	protein_coding_genes	0.0916251154927444	basic_model	CATSPER1
log_likelihoods	protein_coding_genes	0.0916286924455322	basic_model	OR52J3
log_likelihoods	protein_coding_genes	0.0917680360402797	basic_model	DNAJC5G
log_likelihoods	protein_coding_genes	0.0917973810491421	basic_model	PRSS33
log_likelihoods	protein_coding_genes	0.0922587960101953	basic_model	SLC39A12
log_likelihoods	protein_coding_genes	0.0923960421874661	basic_model	AL354898.1
log_likelihoods	protein_coding_genes	0.0926566684796851	basic_model	NLRP3
log_likelihoods	protein_coding_genes	0.0928734365726331	basic_model	TAS2R10
log_likelihoods	protein_coding_genes	0.0930176981602224	basic_model	SPINT3
log_likelihoods	protein_coding_genes	0.093043850902972	basic_model	SERPING1
log_likelihoods	protein_coding_genes	0.0933372439203023	basic_model	ADAMDEC1
log_likelihoods	protein_coding_genes	0.0935451971317258	basic_model	SYT16
log_likelihoods	protein_coding_genes	0.0936662841368011	basic_model	MAP2K3
log_likelihoods	protein_coding_genes	0.0945172620326374	basic_model	TAAR6
log_likelihoods	protein_coding_genes	0.0949075700015379	basic_model	A2M
log_likelihoods	protein_coding_genes	0.0951817510551523	basic_model	AC022498.1
log_likelihoods	protein_coding_genes	0.0952041841728057	basic_model	OR4D11
log_likelihoods	protein_coding_genes	0.0962370027513584	basic_model	PSG9
log_likelihoods	protein_coding_genes	0.096452069704307	basic_model	TNFSF10
log_likelihoods	protein_coding_genes	0.0965694604335484	basic_model	ICA1
log_likelihoods	protein_coding_genes	0.0973739663789486	basic_model	MUC19
log_likelihoods	protein_coding_genes	0.097692657970713	basic_model	GPR141
log_likelihoods	protein_coding_genes	0.0977413723041004	basic_model	VEGFC
log_likelihoods	protein_coding_genes	0.0977505751499515	basic_model	ATP6V1G2
log_likelihoods	protein_coding_genes	0.0981089421634401	basic_model	HDAC11
log_likelihoods	protein_coding_genes	0.0987123499408899	basic_model	FAM196B
log_likelihoods	protein_coding_genes	0.098716384654964	basic_model	CARD17
log_likelihoods	protein_coding_genes	0.0988803827137477	basic_model	EFCAB9
log_likelihoods	protein_coding_genes	0.0990661171859505	basic_model	PYDC2
log_likelihoods	protein_coding_genes	0.0997562564904534	basic_model	NPVF
log_likelihoods	protein_coding_genes	0.0999868802826209	basic_model	OR4C16
log_likelihoods	protein_coding_genes	0.100110245502119	basic_model	RP11-332O19.5
log_likelihoods	protein_coding_genes	0.10028888828509	basic_model	TAF13
log_likelihoods	protein_coding_genes	0.100427731698182	basic_model	LRRC15
log_likelihoods	protein_coding_genes	0.100448776895322	basic_model	LILRA1
log_likelihoods	protein_coding_genes	0.100935750326426	basic_model	AKR1B10
log_likelihoods	protein_coding_genes	0.101003605076044	basic_model	ZNF812
log_likelihoods	protein_coding_genes	0.101314717678152	basic_model	PATE4
log_likelihoods	protein_coding_genes	0.101361161560305	basic_model	OR4K1
log_likelihoods	protein_coding_genes	0.10200020831076	basic_model	CMTM5
log_likelihoods	protein_coding_genes	0.102611760805263	basic_model	ZPLD1
log_likelihoods	protein_coding_genes	0.102893807198606	basic_model	STATH
log_likelihoods	protein_coding_genes	0.10306253092	basic_model	ITGB3BP
log_likelihoods	protein_coding_genes	0.1030705691715	basic_model	CILP
log_likelihoods	protein_coding_genes	0.10342692347502	basic_model	TCF23
log_likelihoods	protein_coding_genes	0.103943737803641	basic_model	WNT2
log_likelihoods	protein_coding_genes	0.104015420088674	basic_model	OR7D2
log_likelihoods	protein_coding_genes	0.104231534115305	basic_model	CCL21
log_likelihoods	protein_coding_genes	0.104365415930455	basic_model	GJD2
log_likelihoods	protein_coding_genes	0.104389368491641	basic_model	OR5M3
log_likelihoods	protein_coding_genes	0.104637911392826	basic_model	KRTAP5-2
log_likelihoods	protein_coding_genes	0.104662026523314	basic_model	FAM57B
log_likelihoods	protein_coding_genes	0.104970562909153	basic_model	TCTA
log_likelihoods	protein_coding_genes	0.105260872803356	basic_model	RP11-180C1.1
log_likelihoods	protein_coding_genes	0.105329475089215	basic_model	RP11-758M4.1
log_likelihoods	protein_coding_genes	0.105435895361264	basic_model	LRRC18
log_likelihoods	protein_coding_genes	0.105472497648881	basic_model	TMEM212
log_likelihoods	protein_coding_genes	0.105635018182444	basic_model	RP1-228P16.5
log_likelihoods	protein_coding_genes	0.105679669474324	basic_model	AC120194.1
log_likelihoods	protein_coding_genes	0.105798346639609	basic_model	LRRC32
log_likelihoods	protein_coding_genes	0.106056183694291	basic_model	ANP32E
log_likelihoods	protein_coding_genes	0.106129863902262	basic_model	PXMP4
log_likelihoods	protein_coding_genes	0.106444369962251	basic_model	ARL5C
log_likelihoods	protein_coding_genes	0.106731334907683	basic_model	CEP19
log_likelihoods	protein_coding_genes	0.106960133008862	basic_model	DEFB115
log_likelihoods	protein_coding_genes	0.106975924193135	basic_model	OR6K2
log_likelihoods	protein_coding_genes	0.107059726953026	basic_model	CDK2AP1
log_likelihoods	protein_coding_genes	0.107118033681007	basic_model	CDH18
log_likelihoods	protein_coding_genes	0.107797457462901	basic_model	POLD3
log_likelihoods	protein_coding_genes	0.107883549098721	basic_model	SBSN
log_likelihoods	protein_coding_genes	0.107927119979872	basic_model	MTRNR2L7
log_likelihoods	protein_coding_genes	0.108048124619553	basic_model	C1orf172
log_likelihoods	protein_coding_genes	0.108286280381305	basic_model	RNASE11
log_likelihoods	protein_coding_genes	0.108589196501428	basic_model	MSRB1
log_likelihoods	protein_coding_genes	0.108962517898651	basic_model	NPY5R
log_likelihoods	protein_coding_genes	0.109094913356568	basic_model	NSG2
log_likelihoods	protein_coding_genes	0.109259726756245	basic_model	KRTAP12-4
log_likelihoods	protein_coding_genes	0.109352031792547	basic_model	CDH7
log_likelihoods	protein_coding_genes	0.109352989730882	basic_model	TEX35
log_likelihoods	protein_coding_genes	0.109447291421979	basic_model	ZNF683
log_likelihoods	protein_coding_genes	0.109610419990373	basic_model	EPT1
log_likelihoods	protein_coding_genes	0.109719251816889	basic_model	ADAM28
log_likelihoods	protein_coding_genes	0.109741513731436	basic_model	WNT8B
log_likelihoods	protein_coding_genes	0.109897078979254	basic_model	PLIN3
log_likelihoods	protein_coding_genes	0.110083947400146	basic_model	CD3D
log_likelihoods	protein_coding_genes	0.11014869110824	basic_model	RP11-514O12.4
log_likelihoods	protein_coding_genes	0.110362128127095	basic_model	IL8
log_likelihoods	protein_coding_genes	0.11098602098495	basic_model	ZFAND5
log_likelihoods	protein_coding_genes	0.111298906048601	basic_model	FAM161A
log_likelihoods	protein_coding_genes	0.111341712631895	basic_model	OR4D5
log_likelihoods	protein_coding_genes	0.111832413918499	basic_model	AL627171.1
log_likelihoods	protein_coding_genes	0.112114953130278	basic_model	TEX29
log_likelihoods	protein_coding_genes	0.112150645051197	basic_model	FBXO27
log_likelihoods	protein_coding_genes	0.112458725802027	basic_model	RP11-723G8.2
log_likelihoods	protein_coding_genes	0.112575675040768	basic_model	AL133481.1
log_likelihoods	protein_coding_genes	0.112843134120813	basic_model	AC092850.1
log_likelihoods	protein_coding_genes	0.112881490206247	basic_model	C10orf115
log_likelihoods	protein_coding_genes	0.112999208535167	basic_model	CHST11
log_likelihoods	protein_coding_genes	0.113527562153787	basic_model	TXNL4B
log_likelihoods	protein_coding_genes	0.113576716370371	basic_model	AC016722.2
log_likelihoods	protein_coding_genes	0.114059100261053	basic_model	RP11-187E13.1
log_likelihoods	protein_coding_genes	0.114155385614016	basic_model	CD28
log_likelihoods	protein_coding_genes	0.11426295742434	basic_model	CTSS
log_likelihoods	protein_coding_genes	0.114559237312897	basic_model	RP5-850E9.3
log_likelihoods	protein_coding_genes	0.114573620208856	basic_model	UBE2W
log_likelihoods	protein_coding_genes	0.114978113477481	basic_model	EMR1
log_likelihoods	protein_coding_genes	0.114985772675203	basic_model	COX8A
log_likelihoods	protein_coding_genes	0.115199500494013	basic_model	RAD21L1
log_likelihoods	protein_coding_genes	0.115302405294409	basic_model	DNAL1
log_likelihoods	protein_coding_genes	0.115341974046639	basic_model	SIGLEC11
log_likelihoods	protein_coding_genes	0.115786055299249	basic_model	OR4K5
log_likelihoods	protein_coding_genes	0.116038216173982	basic_model	CCNE1
log_likelihoods	protein_coding_genes	0.116049073321668	basic_model	CCR5
log_likelihoods	protein_coding_genes	0.116630781201885	basic_model	NPBWR2
log_likelihoods	protein_coding_genes	0.117132294017874	basic_model	RP11-62N21.1
log_likelihoods	protein_coding_genes	0.117327546320855	basic_model	AC005082.1
log_likelihoods	protein_coding_genes	0.117420939833278	basic_model	SLC12A8
log_likelihoods	protein_coding_genes	0.11743984054019	basic_model	AL445665.1
log_likelihoods	protein_coding_genes	0.11750117609646	basic_model	AC016722.1
log_likelihoods	protein_coding_genes	0.117664114423018	basic_model	TMEM30C
log_likelihoods	protein_coding_genes	0.117807448163034	basic_model	OR4C12
log_likelihoods	protein_coding_genes	0.117931127279582	basic_model	OR6T1
log_likelihoods	protein_coding_genes	0.118037680224721	basic_model	IL1A
log_likelihoods	protein_coding_genes	0.118278143035665	basic_model	FAM186A
log_likelihoods	protein_coding_genes	0.118344089745794	basic_model	TDRD10
log_likelihoods	protein_coding_genes	0.119512889255025	basic_model	C20orf141
log_likelihoods	protein_coding_genes	0.119603157537998	basic_model	DEFB136
log_likelihoods	protein_coding_genes	0.119651535438159	basic_model	MOGAT3
log_likelihoods	protein_coding_genes	0.1200587677729	basic_model	CRCP
log_likelihoods	protein_coding_genes	0.120694046546226	basic_model	NR1H4
log_likelihoods	protein_coding_genes	0.120743064050317	basic_model	BEST3
log_likelihoods	protein_coding_genes	0.120781380447624	basic_model	KRTAP10-6
log_likelihoods	protein_coding_genes	0.121402413552588	basic_model	SPOP
log_likelihoods	protein_coding_genes	0.121497120218613	basic_model	TRIML1
log_likelihoods	protein_coding_genes	0.121530598581876	basic_model	CEACAM21
log_likelihoods	protein_coding_genes	0.121601643970409	basic_model	IGF2BP1
log_likelihoods	protein_coding_genes	0.121785439935971	basic_model	PTPN2
log_likelihoods	protein_coding_genes	0.12184219677769	basic_model	PROL1
log_likelihoods	protein_coding_genes	0.121938525705556	basic_model	PGAP3
log_likelihoods	protein_coding_genes	0.122080794602667	basic_model	GNGT2
log_likelihoods	protein_coding_genes	0.122085545603125	basic_model	LRRC3DN
log_likelihoods	protein_coding_genes	0.122089980914358	basic_model	FETUB
log_likelihoods	protein_coding_genes	0.122999158790146	basic_model	ANGPT1
log_likelihoods	protein_coding_genes	0.123041696004977	basic_model	ZNF285
log_likelihoods	protein_coding_genes	0.123072633149497	basic_model	STK38
log_likelihoods	protein_coding_genes	0.123649149541933	basic_model	OVGP1
log_likelihoods	protein_coding_genes	0.123688879472021	basic_model	CTC-786C10.1
log_likelihoods	protein_coding_genes	0.123788768808435	basic_model	ZNF283
log_likelihoods	protein_coding_genes	0.123872975060386	basic_model	ACSM2A
log_likelihoods	protein_coding_genes	0.124219699883939	basic_model	LILRB1
log_likelihoods	protein_coding_genes	0.124254021934591	basic_model	GPR1
log_likelihoods	protein_coding_genes	0.12439285220301	basic_model	CLEC17A
log_likelihoods	protein_coding_genes	0.124842759048349	basic_model	IL1F10
log_likelihoods	protein_coding_genes	0.125243881761725	basic_model	AC006132.1
log_likelihoods	protein_coding_genes	0.125618825861897	basic_model	AC005008.2
log_likelihoods	protein_coding_genes	0.126118769350643	basic_model	CELA3A
log_likelihoods	protein_coding_genes	0.126593224469935	basic_model	IL1B
log_likelihoods	protein_coding_genes	0.126907264771126	basic_model	GPR158
log_likelihoods	protein_coding_genes	0.126959827402411	basic_model	TSPAN8
log_likelihoods	protein_coding_genes	0.127616342304666	basic_model	UGT1A9
log_likelihoods	protein_coding_genes	0.127890799645176	basic_model	CST9L
log_likelihoods	protein_coding_genes	0.128120129042108	basic_model	AZU1
log_likelihoods	protein_coding_genes	0.128188852133808	basic_model	OR2T2
log_likelihoods	protein_coding_genes	0.128221469752446	basic_model	AC091801.1
log_likelihoods	protein_coding_genes	0.128222893536751	basic_model	UGT1A5
log_likelihoods	protein_coding_genes	0.128321937457813	basic_model	SLC51B
log_likelihoods	protein_coding_genes	0.129197179491556	basic_model	FFAR3
log_likelihoods	protein_coding_genes	0.129404139196221	basic_model	KRT9
log_likelihoods	protein_coding_genes	0.12985789232749	basic_model	AL353354.1
log_likelihoods	protein_coding_genes	0.129946083500424	basic_model	OR5H14
log_likelihoods	protein_coding_genes	0.130092820821436	basic_model	EIF2B3
log_likelihoods	protein_coding_genes	0.130209983247819	basic_model	OR1L8
log_likelihoods	protein_coding_genes	0.130505127131343	basic_model	PCDHB2
log_likelihoods	protein_coding_genes	0.131715385590078	basic_model	CBFA2T3
log_likelihoods	protein_coding_genes	0.132045897329417	basic_model	F2RL1
log_likelihoods	protein_coding_genes	0.132327464243392	basic_model	OR10J5
log_likelihoods	protein_coding_genes	0.132352239249316	basic_model	CHGB
log_likelihoods	protein_coding_genes	0.132369328814848	basic_model	CCR2
log_likelihoods	protein_coding_genes	0.132378394205693	basic_model	MMP11
log_likelihoods	protein_coding_genes	0.132704533011507	basic_model	KRT6A
log_likelihoods	protein_coding_genes	0.132776825497638	basic_model	NUTM1
log_likelihoods	protein_coding_genes	0.133270218082256	basic_model	TAS1R2
log_likelihoods	protein_coding_genes	0.133344494040245	basic_model	C15orf54
log_likelihoods	protein_coding_genes	0.133356315015928	basic_model	PUM1
log_likelihoods	protein_coding_genes	0.133376199244433	basic_model	CHST3
log_likelihoods	protein_coding_genes	0.133591499835129	basic_model	NPPB
log_likelihoods	protein_coding_genes	0.13403592476004	basic_model	S100A2
log_likelihoods	protein_coding_genes	0.134355733750287	basic_model	IQCF6
log_likelihoods	protein_coding_genes	0.134510195836105	basic_model	IFNE
log_likelihoods	protein_coding_genes	0.134527934175146	basic_model	CCL27
log_likelihoods	protein_coding_genes	0.13495534436949	basic_model	MMP9
log_likelihoods	protein_coding_genes	0.135164873019893	basic_model	DSN1
log_likelihoods	protein_coding_genes	0.135290153703911	basic_model	CD33
log_likelihoods	protein_coding_genes	0.135300752270509	basic_model	LCN12
log_likelihoods	protein_coding_genes	0.135615727735144	basic_model	PEX5
log_likelihoods	protein_coding_genes	0.135816355914224	basic_model	KLHL1
log_likelihoods	protein_coding_genes	0.135883152963194	basic_model	TOMM6
log_likelihoods	protein_coding_genes	0.136304925377167	basic_model	SLC22A8
log_likelihoods	protein_coding_genes	0.13632806153642	basic_model	OR2T3
log_likelihoods	protein_coding_genes	0.136495472923292	basic_model	AP001055.1
log_likelihoods	protein_coding_genes	0.137440164916777	basic_model	OR51A4
log_likelihoods	protein_coding_genes	0.137507935115324	basic_model	SCG3
log_likelihoods	protein_coding_genes	0.138451093107714	basic_model	TMEM202
log_likelihoods	protein_coding_genes	0.138511785568416	basic_model	CTD-2144E22.5
log_likelihoods	protein_coding_genes	0.138585332967511	basic_model	MS4A7
log_likelihoods	protein_coding_genes	0.138873178467712	basic_model	EIF2S3L
log_likelihoods	protein_coding_genes	0.13940844861362	basic_model	OLAH
log_likelihoods	protein_coding_genes	0.13948848784118	basic_model	SPTSSB
log_likelihoods	protein_coding_genes	0.139617718908588	basic_model	FCGR3A
log_likelihoods	protein_coding_genes	0.140454308109637	basic_model	MAEL
log_likelihoods	protein_coding_genes	0.14055287764919	basic_model	SPIC
log_likelihoods	protein_coding_genes	0.140568771501717	basic_model	CALN1
log_likelihoods	protein_coding_genes	0.140591786981252	basic_model	ZNF425
log_likelihoods	protein_coding_genes	0.140748694401224	basic_model	C5orf24
log_likelihoods	protein_coding_genes	0.140760364791359	basic_model	AC104534.3
log_likelihoods	protein_coding_genes	0.141070291829219	basic_model	PILRB
log_likelihoods	protein_coding_genes	0.141397234022713	basic_model	C6orf58
log_likelihoods	protein_coding_genes	0.141831712222025	basic_model	PNMAL1
log_likelihoods	protein_coding_genes	0.141950728616278	basic_model	ABCG4
log_likelihoods	protein_coding_genes	0.14213650055612	basic_model	SUN3
log_likelihoods	protein_coding_genes	0.142482258959221	basic_model	LOXHD1
log_likelihoods	protein_coding_genes	0.14251059252096	basic_model	CNRIP1
log_likelihoods	protein_coding_genes	0.142549386038029	basic_model	GIMAP8
log_likelihoods	protein_coding_genes	0.142954599435192	basic_model	ZNF300
log_likelihoods	protein_coding_genes	0.143004603861723	basic_model	ZFP3
log_likelihoods	protein_coding_genes	0.143084916851047	basic_model	ACTL9
log_likelihoods	protein_coding_genes	0.143119175585202	basic_model	SLC25A34
log_likelihoods	protein_coding_genes	0.143472344119841	basic_model	SCGB1D4
log_likelihoods	protein_coding_genes	0.144058029560529	basic_model	CYP2C19
log_likelihoods	protein_coding_genes	0.144158597908611	basic_model	CPZ
log_likelihoods	protein_coding_genes	0.144402084312267	basic_model	CASP14
log_likelihoods	protein_coding_genes	0.14445560393638	basic_model	TECRL
log_likelihoods	protein_coding_genes	0.144824148446338	basic_model	RBX1
log_likelihoods	protein_coding_genes	0.144884944817144	basic_model	OR2G3
log_likelihoods	protein_coding_genes	0.145202247834931	basic_model	NEDD8-MDP1
log_likelihoods	protein_coding_genes	0.145624239723958	basic_model	PBRM1
log_likelihoods	protein_coding_genes	0.146055341927388	basic_model	MT1A
log_likelihoods	protein_coding_genes	0.146459059856249	basic_model	CHRM2
log_likelihoods	protein_coding_genes	0.147759488977122	basic_model	S100A7L2
log_likelihoods	protein_coding_genes	0.1483003059198	basic_model	HLA-C
log_likelihoods	protein_coding_genes	0.148598545744237	basic_model	SULT1A2
log_likelihoods	protein_coding_genes	0.149002812050102	basic_model	AADACL3
log_likelihoods	protein_coding_genes	0.149223492159006	basic_model	KCNK18
log_likelihoods	protein_coding_genes	0.149523740863279	basic_model	SERPINB2
log_likelihoods	protein_coding_genes	0.149907997156039	basic_model	CYP1A1
log_likelihoods	protein_coding_genes	0.150346959443697	basic_model	TAF1L
log_likelihoods	protein_coding_genes	0.150844327911491	basic_model	RNASE10
log_likelihoods	protein_coding_genes	0.150908706107897	basic_model	ANP32B
log_likelihoods	protein_coding_genes	0.151296224136449	basic_model	IL31
log_likelihoods	protein_coding_genes	0.151498479647171	basic_model	SWI5
log_likelihoods	protein_coding_genes	0.151526260103007	basic_model	CCDC173
log_likelihoods	protein_coding_genes	0.151565265336744	basic_model	PPP2CA
log_likelihoods	protein_coding_genes	0.151585983159922	basic_model	C17orf66
log_likelihoods	protein_coding_genes	0.15168437737138	basic_model	MAP1LC3C
log_likelihoods	protein_coding_genes	0.151748911266843	basic_model	JTB
log_likelihoods	protein_coding_genes	0.151768324907527	basic_model	RPP25L
log_likelihoods	protein_coding_genes	0.151838491746445	basic_model	AC069547.1
log_likelihoods	protein_coding_genes	0.152077096147306	basic_model	RNASE3
log_likelihoods	protein_coding_genes	0.15259437319672	basic_model	ANGPT4
log_likelihoods	protein_coding_genes	0.152605455752998	basic_model	C4orf26
log_likelihoods	protein_coding_genes	0.152647146486187	basic_model	MRPL11
log_likelihoods	protein_coding_genes	0.1527631011341	basic_model	KIR3DL1
log_likelihoods	protein_coding_genes	0.152957733977451	basic_model	SIGLEC8
log_likelihoods	protein_coding_genes	0.15309176573493	basic_model	ETS2
log_likelihoods	protein_coding_genes	0.153160130739258	basic_model	ELAVL2
log_likelihoods	protein_coding_genes	0.153257348477734	basic_model	LOH12CR2
log_likelihoods	protein_coding_genes	0.15404672649388	basic_model	AVPR1B
log_likelihoods	protein_coding_genes	0.154302822012971	basic_model	ZFHX4
log_likelihoods	protein_coding_genes	0.154452885414324	basic_model	RIIAD1
log_likelihoods	protein_coding_genes	0.154494291822409	basic_model	ERVW-1
log_likelihoods	protein_coding_genes	0.154786585953892	basic_model	LCE1B
log_likelihoods	protein_coding_genes	0.15489575836499	basic_model	FOLR1
log_likelihoods	protein_coding_genes	0.15493648881693	basic_model	HCAR3
log_likelihoods	protein_coding_genes	0.155016081481768	basic_model	RHOA
log_likelihoods	protein_coding_genes	0.155182485820831	basic_model	SLC15A2
log_likelihoods	protein_coding_genes	0.155413839187583	basic_model	GPR12
log_likelihoods	protein_coding_genes	0.15556024645391	basic_model	PRNT
log_likelihoods	protein_coding_genes	0.155775276092307	basic_model	NLRP7
log_likelihoods	protein_coding_genes	0.155983316123844	basic_model	TTC24
log_likelihoods	protein_coding_genes	0.155985274639679	basic_model	KRT26
log_likelihoods	protein_coding_genes	0.156515680294418	basic_model	AL441883.1
log_likelihoods	protein_coding_genes	0.156710425614742	basic_model	SDHAF2
log_likelihoods	protein_coding_genes	0.156806684389041	basic_model	RPL21
log_likelihoods	protein_coding_genes	0.157002034978629	basic_model	OR10R2
log_likelihoods	protein_coding_genes	0.157211216785675	basic_model	LSMEM2
log_likelihoods	protein_coding_genes	0.157466097157073	basic_model	KRT25
log_likelihoods	protein_coding_genes	0.157798828421586	basic_model	FRMPD2
log_likelihoods	protein_coding_genes	0.157868780482917	basic_model	OTOL1
log_likelihoods	protein_coding_genes	0.157897845610291	basic_model	OR6K3
log_likelihoods	protein_coding_genes	0.158661495082676	basic_model	ZIM3
log_likelihoods	protein_coding_genes	0.158723742547888	basic_model	CDH11
log_likelihoods	protein_coding_genes	0.158871022982191	basic_model	OR4M1
log_likelihoods	protein_coding_genes	0.159041429525801	basic_model	RNF148
log_likelihoods	protein_coding_genes	0.159206203739288	basic_model	NOP10
log_likelihoods	protein_coding_genes	0.159541001529251	basic_model	MSMP
log_likelihoods	protein_coding_genes	0.159617274509136	basic_model	CYP4F31P
log_likelihoods	protein_coding_genes	0.159918380085354	basic_model	PTPN9
log_likelihoods	protein_coding_genes	0.160467636258097	basic_model	C1orf170
log_likelihoods	protein_coding_genes	0.160534687744239	basic_model	C1orf177
log_likelihoods	protein_coding_genes	0.160626808759587	basic_model	RGS6
log_likelihoods	protein_coding_genes	0.160717477753181	basic_model	AC005549.3
log_likelihoods	protein_coding_genes	0.161539462871244	basic_model	LMAN2L
log_likelihoods	protein_coding_genes	0.161734570270007	basic_model	ZNF286A
log_likelihoods	protein_coding_genes	0.161747599749815	basic_model	AL137002.1
log_likelihoods	protein_coding_genes	0.162486453948393	basic_model	CCL14
log_likelihoods	protein_coding_genes	0.162566501999582	basic_model	ARL2
log_likelihoods	protein_coding_genes	0.163010058260609	basic_model	CACFD1
log_likelihoods	protein_coding_genes	0.163138873734829	basic_model	AC132216.1
log_likelihoods	protein_coding_genes	0.163496800698177	basic_model	OR4M2
log_likelihoods	protein_coding_genes	0.163587308557984	basic_model	ENPP7
log_likelihoods	protein_coding_genes	0.163605585350864	basic_model	SNAI2
log_likelihoods	protein_coding_genes	0.163896135119672	basic_model	C16orf11
log_likelihoods	protein_coding_genes	0.163998438007932	basic_model	PKMYT1
log_likelihoods	protein_coding_genes	0.164427620560809	basic_model	OR6P1
log_likelihoods	protein_coding_genes	0.165019620213457	basic_model	VPREB1
log_likelihoods	protein_coding_genes	0.165264787702984	basic_model	ZNF501
log_likelihoods	protein_coding_genes	0.165398061438929	basic_model	COL21A1
log_likelihoods	protein_coding_genes	0.165417332200018	basic_model	GSTM5
log_likelihoods	protein_coding_genes	0.16543910315086	basic_model	L47234.1
log_likelihoods	protein_coding_genes	0.165472804868831	basic_model	SPRR2F
log_likelihoods	protein_coding_genes	0.165896690782904	basic_model	ZNF625
log_likelihoods	protein_coding_genes	0.166118036813214	basic_model	OR5L2
log_likelihoods	protein_coding_genes	0.166539213118816	basic_model	ZNF205
log_likelihoods	protein_coding_genes	0.166712143138011	basic_model	ADNP
log_likelihoods	protein_coding_genes	0.166895734373316	basic_model	TIE1
log_likelihoods	protein_coding_genes	0.166920202391433	basic_model	OR2M4
log_likelihoods	protein_coding_genes	0.166994721630117	basic_model	EPS8L3
log_likelihoods	protein_coding_genes	0.167252733662998	basic_model	FKBP1C
log_likelihoods	protein_coding_genes	0.167488646978061	basic_model	LILRA5
log_likelihoods	protein_coding_genes	0.167591289705449	basic_model	KRTAP17-1
log_likelihoods	protein_coding_genes	0.1683027825347	basic_model	C14orf182
log_likelihoods	protein_coding_genes	0.168459748576842	basic_model	DCLRE1C
log_likelihoods	protein_coding_genes	0.168511989821109	basic_model	CD86
log_likelihoods	protein_coding_genes	0.168671605044445	basic_model	BPIFB1
log_likelihoods	protein_coding_genes	0.168695199202197	basic_model	NKIRAS1
log_likelihoods	protein_coding_genes	0.168833975530114	basic_model	CSF3R
log_likelihoods	protein_coding_genes	0.168851754173167	basic_model	DRAM1
log_likelihoods	protein_coding_genes	0.168865124298478	basic_model	OR10H4
log_likelihoods	protein_coding_genes	0.168909640047223	basic_model	CEACAM19
log_likelihoods	protein_coding_genes	0.169032957983645	basic_model	INSL3
log_likelihoods	protein_coding_genes	0.169295921425685	basic_model	CDYL
log_likelihoods	protein_coding_genes	0.169903499034896	basic_model	OR11H4
log_likelihoods	protein_coding_genes	0.170693004930029	basic_model	KPNA7
log_likelihoods	protein_coding_genes	0.17084471247337	basic_model	CDSN
log_likelihoods	protein_coding_genes	0.170862622117363	basic_model	CBS
log_likelihoods	protein_coding_genes	0.171123877389295	basic_model	RP11-1C1.5
log_likelihoods	protein_coding_genes	0.171182070528724	basic_model	NNMT
log_likelihoods	protein_coding_genes	0.171219999303381	basic_model	HVCN1
log_likelihoods	protein_coding_genes	0.171436064860262	basic_model	KRTAP5-5
log_likelihoods	protein_coding_genes	0.17147349155421	basic_model	RNF181
log_likelihoods	protein_coding_genes	0.171577244162012	basic_model	OR2Y1
log_likelihoods	protein_coding_genes	0.171730039425795	basic_model	CHRND
log_likelihoods	protein_coding_genes	0.171956234188866	basic_model	AC024257.1
log_likelihoods	protein_coding_genes	0.172032121356834	basic_model	CRELD1
log_likelihoods	protein_coding_genes	0.172272345560381	basic_model	SDR16C5
log_likelihoods	protein_coding_genes	0.17232183534119	basic_model	CCNA2
log_likelihoods	protein_coding_genes	0.172623810692467	basic_model	GNGT1
log_likelihoods	protein_coding_genes	0.173194449650758	basic_model	GYPE
log_likelihoods	protein_coding_genes	0.173752478645579	basic_model	GFRAL
log_likelihoods	protein_coding_genes	0.173791877214465	basic_model	SMR3B
log_likelihoods	protein_coding_genes	0.173801891489987	basic_model	OR14K1
log_likelihoods	protein_coding_genes	0.173907586279405	basic_model	VPREB3
log_likelihoods	protein_coding_genes	0.174373726461567	basic_model	AC011298.1
log_likelihoods	protein_coding_genes	0.174389746762316	basic_model	HPCAL1
log_likelihoods	protein_coding_genes	0.174421131883101	basic_model	OR4N5
log_likelihoods	protein_coding_genes	0.1746228806463	basic_model	KRT79
log_likelihoods	protein_coding_genes	0.174659234089686	basic_model	SMAD2
log_likelihoods	protein_coding_genes	0.175440699254707	basic_model	PZP
log_likelihoods	protein_coding_genes	0.175525620202035	basic_model	CTD-2049J23.3
log_likelihoods	protein_coding_genes	0.175547230375388	basic_model	PHF11
log_likelihoods	protein_coding_genes	0.175559681652544	basic_model	GOLGA7B
log_likelihoods	protein_coding_genes	0.175782112363609	basic_model	MTRNR2L8
log_likelihoods	protein_coding_genes	0.175875046358486	basic_model	IFITM3
log_likelihoods	protein_coding_genes	0.176106331969793	basic_model	C10orf131
log_likelihoods	protein_coding_genes	0.176201264927104	basic_model	AC121757.1
log_likelihoods	protein_coding_genes	0.176238530547221	basic_model	GPR97
log_likelihoods	protein_coding_genes	0.176842052782995	basic_model	SAMHD1
log_likelihoods	protein_coding_genes	0.177013750503287	basic_model	SEMA3G
log_likelihoods	protein_coding_genes	0.177124880575602	basic_model	OR2M2
log_likelihoods	protein_coding_genes	0.177480651345944	basic_model	SUB1
log_likelihoods	protein_coding_genes	0.177488047555852	basic_model	IL1RL1
log_likelihoods	protein_coding_genes	0.177701917229715	basic_model	CLIC1
log_likelihoods	protein_coding_genes	0.177754816750758	basic_model	SELP
log_likelihoods	protein_coding_genes	0.178012461136508	basic_model	RFPL4A
log_likelihoods	protein_coding_genes	0.178195333847389	basic_model	GRB2
log_likelihoods	protein_coding_genes	0.178495723552544	basic_model	UBE2R2
log_likelihoods	protein_coding_genes	0.178533051353748	basic_model	AGBL3
log_likelihoods	protein_coding_genes	0.178571186687252	basic_model	CDK18
log_likelihoods	protein_coding_genes	0.179262724516738	basic_model	WDR93
log_likelihoods	protein_coding_genes	0.179627063389031	basic_model	GPX8
log_likelihoods	protein_coding_genes	0.179647930390386	basic_model	SNCB
log_likelihoods	protein_coding_genes	0.179790519039114	basic_model	FPR3
log_likelihoods	protein_coding_genes	0.179827096704103	basic_model	KRTAP10-2
log_likelihoods	protein_coding_genes	0.180110048421183	basic_model	RP11-861L17.3
log_likelihoods	protein_coding_genes	0.180119801189623	basic_model	POTEF
log_likelihoods	protein_coding_genes	0.18019696528868	basic_model	TEKT3
log_likelihoods	protein_coding_genes	0.180197668032908	basic_model	TIMP3
log_likelihoods	protein_coding_genes	0.180209148193544	basic_model	C1orf54
log_likelihoods	protein_coding_genes	0.180225928046225	basic_model	AC051642.1
log_likelihoods	protein_coding_genes	0.180530446980554	basic_model	PHOSPHO2
log_likelihoods	protein_coding_genes	0.180603854985787	basic_model	RD3
log_likelihoods	protein_coding_genes	0.180990622589492	basic_model	ZNF594
log_likelihoods	protein_coding_genes	0.18101347879031	basic_model	C8orf4
log_likelihoods	protein_coding_genes	0.181735136142569	basic_model	PDE6H
log_likelihoods	protein_coding_genes	0.182167355949338	basic_model	SPATA3
log_likelihoods	protein_coding_genes	0.182321026075528	basic_model	C18orf42
log_likelihoods	protein_coding_genes	0.182541327282236	basic_model	CYSLTR2
log_likelihoods	protein_coding_genes	0.182644759778111	basic_model	HIST1H2AA
log_likelihoods	protein_coding_genes	0.182678848452209	basic_model	OR6C76
log_likelihoods	protein_coding_genes	0.182794584549721	basic_model	C9orf153
log_likelihoods	protein_coding_genes	0.182812318788739	basic_model	CASP16
log_likelihoods	protein_coding_genes	0.18294773388342	basic_model	ADARB1
log_likelihoods	protein_coding_genes	0.183432358672404	basic_model	ITLN1
log_likelihoods	protein_coding_genes	0.18355629512363	basic_model	OR2AJ1
log_likelihoods	protein_coding_genes	0.183581588385704	basic_model	ZSCAN5B
log_likelihoods	protein_coding_genes	0.184112417264886	basic_model	UBB
log_likelihoods	protein_coding_genes	0.184134596809958	basic_model	PPA1
log_likelihoods	protein_coding_genes	0.184336510193981	basic_model	VWC2L
log_likelihoods	protein_coding_genes	0.184597629046572	basic_model	AL035406.1
log_likelihoods	protein_coding_genes	0.184670177790916	basic_model	NOS1
log_likelihoods	protein_coding_genes	0.184685975321772	basic_model	UGT3A1
log_likelihoods	protein_coding_genes	0.184880582758204	basic_model	MYCT1
log_likelihoods	protein_coding_genes	0.185344735529829	basic_model	PCP4L1
log_likelihoods	protein_coding_genes	0.185356017805897	basic_model	CGB7
log_likelihoods	protein_coding_genes	0.185753450256941	basic_model	A2ML1
log_likelihoods	protein_coding_genes	0.186050652261948	basic_model	CD70
log_likelihoods	protein_coding_genes	0.186304628981019	basic_model	TMEM225
log_likelihoods	protein_coding_genes	0.186492758777589	basic_model	AC012493.2
log_likelihoods	protein_coding_genes	0.186705700860401	basic_model	OR5T2
log_likelihoods	protein_coding_genes	0.186757149278658	basic_model	SPACA4
log_likelihoods	protein_coding_genes	0.186869613092156	basic_model	NPSR1
log_likelihoods	protein_coding_genes	0.186981275828366	basic_model	MRPS17
log_likelihoods	protein_coding_genes	0.187198789767264	basic_model	MS4A10
log_likelihoods	protein_coding_genes	0.187287300071377	basic_model	GDF2
log_likelihoods	protein_coding_genes	0.187414088706459	basic_model	H3F3A
log_likelihoods	protein_coding_genes	0.187512589224445	basic_model	MED18
log_likelihoods	protein_coding_genes	0.18789073096907	basic_model	SMAD4
log_likelihoods	protein_coding_genes	0.188010837625949	basic_model	CTC-236F12.4
log_likelihoods	protein_coding_genes	0.188101494637724	basic_model	OR1G1
log_likelihoods	protein_coding_genes	0.188141073733345	basic_model	CYP11B2
log_likelihoods	protein_coding_genes	0.188205701362289	basic_model	AC020629.1
log_likelihoods	protein_coding_genes	0.188452680721125	basic_model	WFDC6
log_likelihoods	protein_coding_genes	0.18862339542134	basic_model	NMUR2
log_likelihoods	protein_coding_genes	0.188892535966427	basic_model	GPR132
log_likelihoods	protein_coding_genes	0.189208774442396	basic_model	C1ORF220
log_likelihoods	protein_coding_genes	0.189239355313037	basic_model	EFTUD2
log_likelihoods	protein_coding_genes	0.189370647129028	basic_model	MASP1
log_likelihoods	protein_coding_genes	0.189424432558914	basic_model	LRRC55
log_likelihoods	protein_coding_genes	0.189616954875888	basic_model	RP4-576H24.4
log_likelihoods	protein_coding_genes	0.189693038416977	basic_model	AC096677.1
log_likelihoods	protein_coding_genes	0.189856572550042	basic_model	VSTM2A
log_likelihoods	protein_coding_genes	0.190273479655661	basic_model	SSR2
log_likelihoods	protein_coding_genes	0.19037620746899	basic_model	RPE65
log_likelihoods	protein_coding_genes	0.190996131783	basic_model	OR11H6
log_likelihoods	protein_coding_genes	0.191369821078554	basic_model	NWD1
log_likelihoods	protein_coding_genes	0.191584995010319	basic_model	LCT
log_likelihoods	protein_coding_genes	0.191587521446911	basic_model	CASQ1
log_likelihoods	protein_coding_genes	0.191628927555428	basic_model	FAM182B
log_likelihoods	protein_coding_genes	0.19199350491707	basic_model	RETN
log_likelihoods	protein_coding_genes	0.192078077787553	basic_model	RP11-542P2.1
log_likelihoods	protein_coding_genes	0.192265865676399	basic_model	AL358333.1
log_likelihoods	protein_coding_genes	0.192342767804022	basic_model	RNF40
log_likelihoods	protein_coding_genes	0.193015834904844	basic_model	CCBE1
log_likelihoods	protein_coding_genes	0.193235048002767	basic_model	PLA2G12B
log_likelihoods	protein_coding_genes	0.193255584540889	basic_model	TGIF1
log_likelihoods	protein_coding_genes	0.193380524217581	basic_model	FAM183B
log_likelihoods	protein_coding_genes	0.19344846621539	basic_model	OR51V1
log_likelihoods	protein_coding_genes	0.193470097776524	basic_model	CCDC126
log_likelihoods	protein_coding_genes	0.193575850579354	basic_model	C5orf60
log_likelihoods	protein_coding_genes	0.193580179001412	basic_model	RP11-944L7.5
log_likelihoods	protein_coding_genes	0.193621602856809	basic_model	GCLM
log_likelihoods	protein_coding_genes	0.193782251442313	basic_model	PARVB
log_likelihoods	protein_coding_genes	0.194035061187474	basic_model	CYLC2
log_likelihoods	protein_coding_genes	0.194326229759318	basic_model	COL1A2
log_likelihoods	protein_coding_genes	0.194397557248914	basic_model	OR8G5
log_likelihoods	protein_coding_genes	0.194461115216102	basic_model	GPRC5A
log_likelihoods	protein_coding_genes	0.194552708594203	basic_model	LRRC29
log_likelihoods	protein_coding_genes	0.1948024227626	basic_model	AMMECR1L
log_likelihoods	protein_coding_genes	0.195010938222004	basic_model	CCDC87
log_likelihoods	protein_coding_genes	0.195096861163307	basic_model	CARD18
log_likelihoods	protein_coding_genes	0.195319983752131	basic_model	C3orf18
log_likelihoods	protein_coding_genes	0.195325093342984	basic_model	PRPF6
log_likelihoods	protein_coding_genes	0.19576610016548	basic_model	DNAJC28
log_likelihoods	protein_coding_genes	0.195891345672319	basic_model	ARID3C
log_likelihoods	protein_coding_genes	0.19596079548792	basic_model	AQP3
log_likelihoods	protein_coding_genes	0.1971486817814	basic_model	SIGLEC6
log_likelihoods	protein_coding_genes	0.197945101520341	basic_model	RP11-770J1.5
log_likelihoods	protein_coding_genes	0.198234264846062	basic_model	RFPL3S
log_likelihoods	protein_coding_genes	0.198235149032717	basic_model	C20orf27
log_likelihoods	protein_coding_genes	0.198246025374839	basic_model	LITAF
log_likelihoods	protein_coding_genes	0.198355777709163	basic_model	GPR156
log_likelihoods	protein_coding_genes	0.198389146104668	basic_model	MAP2K7
log_likelihoods	protein_coding_genes	0.198390804357447	basic_model	SLC22A25
log_likelihoods	protein_coding_genes	0.198404195293399	basic_model	B3GAT1
log_likelihoods	protein_coding_genes	0.198447329283249	basic_model	GIMAP2
log_likelihoods	protein_coding_genes	0.198536075159768	basic_model	RIT2
log_likelihoods	protein_coding_genes	0.198577491867184	basic_model	ZNF479
log_likelihoods	protein_coding_genes	0.198897986812795	basic_model	C17orf74
log_likelihoods	protein_coding_genes	0.199229485635026	basic_model	GALT
log_likelihoods	protein_coding_genes	0.199230614913664	basic_model	OR5D13
log_likelihoods	protein_coding_genes	0.199451795647683	basic_model	AL117190.3
log_likelihoods	protein_coding_genes	0.199503189261483	basic_model	FAM19A1
log_likelihoods	protein_coding_genes	0.199619952314424	basic_model	FCER1A
log_likelihoods	protein_coding_genes	0.199624653879362	basic_model	TMEM255B
log_likelihoods	protein_coding_genes	0.199836834785344	basic_model	C1S
log_likelihoods	protein_coding_genes	0.199840782295841	basic_model	ATF1
log_likelihoods	protein_coding_genes	0.199930356579217	basic_model	TRAPPC6A
log_likelihoods	protein_coding_genes	0.200191123490008	basic_model	FCRL1
log_likelihoods	protein_coding_genes	0.200280819279747	basic_model	OR8D1
log_likelihoods	protein_coding_genes	0.200336955955012	basic_model	CYP2C8
log_likelihoods	protein_coding_genes	0.200628625725893	basic_model	ASS1
log_likelihoods	protein_coding_genes	0.200797333418656	basic_model	TMEM244
log_likelihoods	protein_coding_genes	0.201230819705454	basic_model	FAM86C1
log_likelihoods	protein_coding_genes	0.201500008181002	basic_model	UCHL1
log_likelihoods	protein_coding_genes	0.201753474325294	basic_model	hsa-mir-150
log_likelihoods	protein_coding_genes	0.201830040144275	basic_model	LY86
log_likelihoods	protein_coding_genes	0.201857719636006	basic_model	OR10AG1
log_likelihoods	protein_coding_genes	0.202336914327497	basic_model	C9orf57
log_likelihoods	protein_coding_genes	0.202508356382817	basic_model	FAM27E1
log_likelihoods	protein_coding_genes	0.202640063598464	basic_model	SPOCK3
log_likelihoods	protein_coding_genes	0.20269717193484	basic_model	PIGL
log_likelihoods	protein_coding_genes	0.202782208373665	basic_model	C1orf100
log_likelihoods	protein_coding_genes	0.202966213200283	basic_model	KRTAP19-8
log_likelihoods	protein_coding_genes	0.203020875372882	basic_model	C14orf132
log_likelihoods	protein_coding_genes	0.203130295006969	basic_model	CDC42SE1
log_likelihoods	protein_coding_genes	0.203171868064271	basic_model	KCNE2
log_likelihoods	protein_coding_genes	0.203423663874863	basic_model	C21orf37
log_likelihoods	protein_coding_genes	0.2034372076152	basic_model	LACRT
log_likelihoods	protein_coding_genes	0.203744448842541	basic_model	HYPK
log_likelihoods	protein_coding_genes	0.203751443643756	basic_model	ARHGAP28
log_likelihoods	protein_coding_genes	0.204021125291898	basic_model	C5orf28
log_likelihoods	protein_coding_genes	0.20415855419564	basic_model	LIPN
log_likelihoods	protein_coding_genes	0.204272962360151	basic_model	CCDC144NL
log_likelihoods	protein_coding_genes	0.204444356920383	basic_model	IMPACT
log_likelihoods	protein_coding_genes	0.204463249361666	basic_model	NR2E1
log_likelihoods	protein_coding_genes	0.205074349178658	basic_model	SLC22A6
log_likelihoods	protein_coding_genes	0.205155465855788	basic_model	CCDC54
log_likelihoods	protein_coding_genes	0.205411233983295	basic_model	CYTH4
log_likelihoods	protein_coding_genes	0.205455498005015	basic_model	RNF41
log_likelihoods	protein_coding_genes	0.205729201052489	basic_model	ENTHD1
log_likelihoods	protein_coding_genes	0.205745310286886	basic_model	T
log_likelihoods	protein_coding_genes	0.205942391182738	basic_model	RNF115
log_likelihoods	protein_coding_genes	0.205960901543456	basic_model	BSPH1
log_likelihoods	protein_coding_genes	0.206081282918993	basic_model	RAB18
log_likelihoods	protein_coding_genes	0.206136394268601	basic_model	TCL1B
log_likelihoods	protein_coding_genes	0.206175688392299	basic_model	PCDHA4
log_likelihoods	protein_coding_genes	0.206545979343354	basic_model	SPATA24
log_likelihoods	protein_coding_genes	0.206564507291858	basic_model	ANKRD40
log_likelihoods	protein_coding_genes	0.206875369069919	basic_model	PITRM1
log_likelihoods	protein_coding_genes	0.206974330070597	basic_model	OR4S2
log_likelihoods	protein_coding_genes	0.206987463915841	basic_model	SERTAD4
log_likelihoods	protein_coding_genes	0.207016135952895	basic_model	KRTAP3-1
log_likelihoods	protein_coding_genes	0.207041694832113	basic_model	COMMD8
log_likelihoods	protein_coding_genes	0.207162741375731	basic_model	REM1
log_likelihoods	protein_coding_genes	0.20724259514007	basic_model	OR2AK2
log_likelihoods	protein_coding_genes	0.207382021357166	basic_model	OR7E24
log_likelihoods	protein_coding_genes	0.207448219784964	basic_model	VN1R4
log_likelihoods	protein_coding_genes	0.207482243194508	basic_model	PTPRCAP
log_likelihoods	protein_coding_genes	0.20758950154784	basic_model	CLK1
log_likelihoods	protein_coding_genes	0.207636784380013	basic_model	OR2V2
log_likelihoods	protein_coding_genes	0.207816533497133	basic_model	THEM5
log_likelihoods	protein_coding_genes	0.20801264587631	basic_model	OR2W3
log_likelihoods	protein_coding_genes	0.208179875952168	basic_model	AC004528.1
log_likelihoods	protein_coding_genes	0.208195490756182	basic_model	OR51M1
log_likelihoods	protein_coding_genes	0.208269133312178	basic_model	RAB2B
log_likelihoods	protein_coding_genes	0.208303779381369	basic_model	HIST1H1B
log_likelihoods	protein_coding_genes	0.208606446766491	basic_model	PSPH
log_likelihoods	protein_coding_genes	0.208640521771523	basic_model	BPIFB4
log_likelihoods	protein_coding_genes	0.208689502109939	basic_model	GJA9
log_likelihoods	protein_coding_genes	0.208754537179682	basic_model	OR10H2
log_likelihoods	protein_coding_genes	0.208779930760863	basic_model	AC093802.1
log_likelihoods	protein_coding_genes	0.208851025928868	basic_model	PSMB11
log_likelihoods	protein_coding_genes	0.208890361478509	basic_model	RP11-45H22.3
log_likelihoods	protein_coding_genes	0.209029571736753	basic_model	AL357673.1
log_likelihoods	protein_coding_genes	0.209065921303895	basic_model	KRTAP21-3
log_likelihoods	protein_coding_genes	0.209116913889603	basic_model	CXCL10
log_likelihoods	protein_coding_genes	0.209178690746387	basic_model	C9orf92
log_likelihoods	protein_coding_genes	0.209228886282101	basic_model	H3F3C
log_likelihoods	protein_coding_genes	0.209655595536633	basic_model	PCDHB16
log_likelihoods	protein_coding_genes	0.209751795181917	basic_model	GALNTL5
log_likelihoods	protein_coding_genes	0.209979935470892	basic_model	AL138815.2
log_likelihoods	protein_coding_genes	0.210340044198752	basic_model	EDEM1
log_likelihoods	protein_coding_genes	0.210607085560561	basic_model	CFLAR
log_likelihoods	protein_coding_genes	0.211049889278691	basic_model	RARS
log_likelihoods	protein_coding_genes	0.211339945686696	basic_model	OR51L1
log_likelihoods	protein_coding_genes	0.211403842041347	basic_model	MLN
log_likelihoods	protein_coding_genes	0.211644549144024	basic_model	ZCCHC17
log_likelihoods	protein_coding_genes	0.211905205181863	basic_model	CD207
log_likelihoods	protein_coding_genes	0.211909882101317	basic_model	ECE2
log_likelihoods	protein_coding_genes	0.212514438431498	basic_model	AC019206.1
log_likelihoods	protein_coding_genes	0.212518435978098	basic_model	PTPN22
log_likelihoods	protein_coding_genes	0.213059109309285	basic_model	ATF4
log_likelihoods	protein_coding_genes	0.213274408994398	basic_model	TSC22D1
log_likelihoods	protein_coding_genes	0.213761905166731	basic_model	C6
log_likelihoods	protein_coding_genes	0.213845889294865	basic_model	HSPB2
log_likelihoods	protein_coding_genes	0.213960456209443	basic_model	TCF21
log_likelihoods	protein_coding_genes	0.213965774953252	basic_model	SH2D1B
log_likelihoods	protein_coding_genes	0.213980034597166	basic_model	HRC
log_likelihoods	protein_coding_genes	0.213999216947232	basic_model	WNT7A
log_likelihoods	protein_coding_genes	0.214002455194555	basic_model	AC022431.2
log_likelihoods	protein_coding_genes	0.214588000358225	basic_model	DCLK3
log_likelihoods	protein_coding_genes	0.214599507455776	basic_model	DEFB110
log_likelihoods	protein_coding_genes	0.214730755353008	basic_model	CDC25A
log_likelihoods	protein_coding_genes	0.215260525492229	basic_model	GOLGA1
log_likelihoods	protein_coding_genes	0.215299061167838	basic_model	HDDC2
log_likelihoods	protein_coding_genes	0.215487090024821	basic_model	TIMM13
log_likelihoods	protein_coding_genes	0.215762484047998	basic_model	LTBP2
log_likelihoods	protein_coding_genes	0.215841324994216	basic_model	OR2T7
log_likelihoods	protein_coding_genes	0.216198070417455	basic_model	PRB4
log_likelihoods	protein_coding_genes	0.216223166863548	basic_model	TBATA
log_likelihoods	protein_coding_genes	0.21623422741655	basic_model	A4GALT
log_likelihoods	protein_coding_genes	0.216620865299013	basic_model	SAA1
log_likelihoods	protein_coding_genes	0.216817906783055	basic_model	CGB5
log_likelihoods	protein_coding_genes	0.217039826146099	basic_model	RP11-598P20.5
log_likelihoods	protein_coding_genes	0.217082453296851	basic_model	ASZ1
log_likelihoods	protein_coding_genes	0.217120155987953	basic_model	CRELD2
log_likelihoods	protein_coding_genes	0.217164418499483	basic_model	FAM227B
log_likelihoods	protein_coding_genes	0.217215804784526	basic_model	C1D
log_likelihoods	protein_coding_genes	0.217352620903574	basic_model	MRPL53
log_likelihoods	protein_coding_genes	0.217643445105327	basic_model	SERTM1
log_likelihoods	protein_coding_genes	0.217924292918633	basic_model	GPIHBP1
log_likelihoods	protein_coding_genes	0.218178249367145	basic_model	GAPDH
log_likelihoods	protein_coding_genes	0.218463082300935	basic_model	SLC17A5
log_likelihoods	protein_coding_genes	0.218628670252739	basic_model	ADH1B
log_likelihoods	protein_coding_genes	0.218662106506124	basic_model	CYP2C18
log_likelihoods	protein_coding_genes	0.218857460374525	basic_model	OR5D14
log_likelihoods	protein_coding_genes	0.218989305733279	basic_model	CRABP1
log_likelihoods	protein_coding_genes	0.219043047314662	basic_model	CNBD1
log_likelihoods	protein_coding_genes	0.219097506813	basic_model	KRTAP6-3
log_likelihoods	protein_coding_genes	0.219102109502815	basic_model	GPR31
log_likelihoods	protein_coding_genes	0.219124491775594	basic_model	RP11-404L6.2
log_likelihoods	protein_coding_genes	0.21922762728837	basic_model	RP11-122A3.2
log_likelihoods	protein_coding_genes	0.219562347188424	basic_model	SNX33
log_likelihoods	protein_coding_genes	0.220076854913909	basic_model	IL6
log_likelihoods	protein_coding_genes	0.220230408803531	basic_model	MPZL3
log_likelihoods	protein_coding_genes	0.220438451551032	basic_model	ERLIN1
log_likelihoods	protein_coding_genes	0.220647684585321	basic_model	IL17A
log_likelihoods	protein_coding_genes	0.220736409441786	basic_model	IP6K3
log_likelihoods	protein_coding_genes	0.221050215837026	basic_model	OR9K2
log_likelihoods	protein_coding_genes	0.221397586058354	basic_model	GRP
log_likelihoods	protein_coding_genes	0.221410950468303	basic_model	FZR1
log_likelihoods	protein_coding_genes	0.221487904358722	basic_model	RNASE11
log_likelihoods	protein_coding_genes	0.221531697434237	basic_model	KLHDC8A
log_likelihoods	protein_coding_genes	0.22166357416419	basic_model	RAB30
log_likelihoods	protein_coding_genes	0.221994232755556	basic_model	TIMP4
log_likelihoods	protein_coding_genes	0.22217804963924	basic_model	TAS2R39
log_likelihoods	protein_coding_genes	0.22222398768404	basic_model	PIANP
log_likelihoods	protein_coding_genes	0.222450004816197	basic_model	ALG8
log_likelihoods	protein_coding_genes	0.222555412995617	basic_model	OR1M1
log_likelihoods	protein_coding_genes	0.222693888252069	basic_model	SLCO1B3
log_likelihoods	protein_coding_genes	0.222931737830908	basic_model	PRMT7
log_likelihoods	protein_coding_genes	0.222975851419397	basic_model	MARCH4
log_likelihoods	protein_coding_genes	0.2230247490082	basic_model	TNFRSF11A
log_likelihoods	protein_coding_genes	0.223176515718701	basic_model	MRGPRD
log_likelihoods	protein_coding_genes	0.223242788388958	basic_model	RAB27B
log_likelihoods	protein_coding_genes	0.223589007635233	basic_model	RFX6
log_likelihoods	protein_coding_genes	0.22371453469093	basic_model	KLRC3
log_likelihoods	protein_coding_genes	0.224199267047642	basic_model	FRS3
log_likelihoods	protein_coding_genes	0.22420949505693	basic_model	USP8
log_likelihoods	protein_coding_genes	0.224676102905795	basic_model	CPT1C
log_likelihoods	protein_coding_genes	0.225093989997932	basic_model	KCNB1
log_likelihoods	protein_coding_genes	0.225267303120203	basic_model	ADAM21
log_likelihoods	protein_coding_genes	0.225563626758238	basic_model	SDS
log_likelihoods	protein_coding_genes	0.225902960497289	basic_model	GJB6
log_likelihoods	protein_coding_genes	0.226101297121762	basic_model	CDH1
log_likelihoods	protein_coding_genes	0.226144955197472	basic_model	HIGD2B
log_likelihoods	protein_coding_genes	0.226726520637593	basic_model	EPHA5
log_likelihoods	protein_coding_genes	0.226801860789285	basic_model	FAM64A
log_likelihoods	protein_coding_genes	0.22714472711404	basic_model	PRIM1
log_likelihoods	protein_coding_genes	0.227180108355444	basic_model	CMBL
log_likelihoods	protein_coding_genes	0.227402449094446	basic_model	LRFN5
log_likelihoods	protein_coding_genes	0.227425766695603	basic_model	PRRG4
log_likelihoods	protein_coding_genes	0.227784188410793	basic_model	SLC8A1
log_likelihoods	protein_coding_genes	0.2280031200035	basic_model	KCNRG
log_likelihoods	protein_coding_genes	0.228225182953399	basic_model	CNTN5
log_likelihoods	protein_coding_genes	0.228400313165137	basic_model	KYNU
log_likelihoods	protein_coding_genes	0.228433168096709	basic_model	ABCD2
log_likelihoods	protein_coding_genes	0.228762531273901	basic_model	PSKH1
log_likelihoods	protein_coding_genes	0.228840231371441	basic_model	CNPY1
log_likelihoods	protein_coding_genes	0.228944968441877	basic_model	RPL39L
log_likelihoods	protein_coding_genes	0.228968910038268	basic_model	S100A13
log_likelihoods	protein_coding_genes	0.229085413657181	basic_model	DENND2C
log_likelihoods	protein_coding_genes	0.229136440456478	basic_model	WISP2
log_likelihoods	protein_coding_genes	0.229145475841045	basic_model	CWH43
log_likelihoods	protein_coding_genes	0.229275333631544	basic_model	CCDC63
log_likelihoods	protein_coding_genes	0.229363391247647	basic_model	IL18R1
log_likelihoods	protein_coding_genes	0.229492825473846	basic_model	PARP6
log_likelihoods	protein_coding_genes	0.229614768536489	basic_model	PPM1N
log_likelihoods	protein_coding_genes	0.229960125225501	basic_model	CHP1
log_likelihoods	protein_coding_genes	0.230000403653962	basic_model	METTL11B
log_likelihoods	protein_coding_genes	0.23004073697557	basic_model	NAA11
log_likelihoods	protein_coding_genes	0.230094433706577	basic_model	RP11-10J21.3
log_likelihoods	protein_coding_genes	0.230261509297969	basic_model	LDLRAD2
log_likelihoods	protein_coding_genes	0.230440996052282	basic_model	OR1L4
log_likelihoods	protein_coding_genes	0.230497616404582	basic_model	BEND6
log_likelihoods	protein_coding_genes	0.230873019098555	basic_model	PAAF1
log_likelihoods	protein_coding_genes	0.231072622716629	basic_model	MPP7
log_likelihoods	protein_coding_genes	0.231134295879406	basic_model	LYZL2
log_likelihoods	protein_coding_genes	0.231330931671224	basic_model	GMFG
log_likelihoods	protein_coding_genes	0.231373498425375	basic_model	KCNE3
log_likelihoods	protein_coding_genes	0.231585069150046	basic_model	CD163
log_likelihoods	protein_coding_genes	0.231848058110143	basic_model	KRT83
log_likelihoods	protein_coding_genes	0.232181704052938	basic_model	AL360181.1
log_likelihoods	protein_coding_genes	0.232181784006678	basic_model	CD3E
log_likelihoods	protein_coding_genes	0.232589919450628	basic_model	KRT6C
log_likelihoods	protein_coding_genes	0.232742860228908	basic_model	RPS2
log_likelihoods	protein_coding_genes	0.232975811413283	basic_model	COPZ2
log_likelihoods	protein_coding_genes	0.233026869907666	basic_model	TAAR2
log_likelihoods	protein_coding_genes	0.233399215664446	basic_model	HEMGN
log_likelihoods	protein_coding_genes	0.233674805778015	basic_model	NFYA
log_likelihoods	protein_coding_genes	0.233678453670843	basic_model	NDUFB3
log_likelihoods	protein_coding_genes	0.23418103936925	basic_model	ACD
log_likelihoods	protein_coding_genes	0.234222336628604	basic_model	TRIM49B
log_likelihoods	protein_coding_genes	0.234365595474217	basic_model	SPZ1
log_likelihoods	protein_coding_genes	0.234464192196029	basic_model	C19orf54
log_likelihoods	protein_coding_genes	0.234592467174603	basic_model	M1AP
log_likelihoods	protein_coding_genes	0.23486403824498	basic_model	OR52L1
log_likelihoods	protein_coding_genes	0.23505240885609	basic_model	MEFV
log_likelihoods	protein_coding_genes	0.235117036733193	basic_model	P4HA2
log_likelihoods	protein_coding_genes	0.235335949140713	basic_model	MS4A18
log_likelihoods	protein_coding_genes	0.235386194756194	basic_model	AC007431.1
log_likelihoods	protein_coding_genes	0.235428272460341	basic_model	NUGGC
log_likelihoods	protein_coding_genes	0.236034453582572	basic_model	FKBP7
log_likelihoods	protein_coding_genes	0.236052511109388	basic_model	LILRA2
log_likelihoods	protein_coding_genes	0.23645060746643	basic_model	OR2A12
log_likelihoods	protein_coding_genes	0.236663909981727	basic_model	STEAP4
log_likelihoods	protein_coding_genes	0.236730205884429	basic_model	ZBTB6
log_likelihoods	protein_coding_genes	0.236757067086162	basic_model	TNNC2
log_likelihoods	protein_coding_genes	0.236851200683664	basic_model	CD48
log_likelihoods	protein_coding_genes	0.236889520271086	basic_model	RFX5
log_likelihoods	protein_coding_genes	0.237044202404743	basic_model	MXD4
log_likelihoods	protein_coding_genes	0.237404531878351	basic_model	OR10G4
log_likelihoods	protein_coding_genes	0.237427519772413	basic_model	OR2W1
log_likelihoods	protein_coding_genes	0.237576147978479	basic_model	MARCH7
log_likelihoods	protein_coding_genes	0.237750435739185	basic_model	C11orf73
log_likelihoods	protein_coding_genes	0.237775658163531	basic_model	SCNN1A
log_likelihoods	protein_coding_genes	0.237846132773053	basic_model	TM2D2
log_likelihoods	protein_coding_genes	0.238022395538675	basic_model	CAPG
log_likelihoods	protein_coding_genes	0.238104402559541	basic_model	DPPA2
log_likelihoods	protein_coding_genes	0.238682573338764	basic_model	KRTAP1-1
log_likelihoods	protein_coding_genes	0.239009646926555	basic_model	TDRD15
log_likelihoods	protein_coding_genes	0.239237611788346	basic_model	ZNF492
log_likelihoods	protein_coding_genes	0.239606580163575	basic_model	OR52A5
log_likelihoods	protein_coding_genes	0.239608375691411	basic_model	HDAC9
log_likelihoods	protein_coding_genes	0.239700983028051	basic_model	TNFRSF8
log_likelihoods	protein_coding_genes	0.23973650496065	basic_model	HDC
log_likelihoods	protein_coding_genes	0.239902243770052	basic_model	OR5AC2
log_likelihoods	protein_coding_genes	0.240134495299942	basic_model	WFDC2
log_likelihoods	protein_coding_genes	0.240342093111323	basic_model	LIPF
log_likelihoods	protein_coding_genes	0.241157893793274	basic_model	DPEP1
log_likelihoods	protein_coding_genes	0.241162702023619	basic_model	CMA1
log_likelihoods	protein_coding_genes	0.241398281840566	basic_model	TFF1
log_likelihoods	protein_coding_genes	0.241928069381994	basic_model	KLRD1
log_likelihoods	protein_coding_genes	0.2419294620901	basic_model	POU6F1
log_likelihoods	protein_coding_genes	0.242143142112653	basic_model	TM4SF19
log_likelihoods	protein_coding_genes	0.242394189965649	basic_model	MMP19
log_likelihoods	protein_coding_genes	0.24267285832323	basic_model	FUCA2
log_likelihoods	protein_coding_genes	0.242680469605416	basic_model	OR6M1
log_likelihoods	protein_coding_genes	0.24329603699947	basic_model	SLC28A1
log_likelihoods	protein_coding_genes	0.243783124085795	basic_model	SORCS1
log_likelihoods	protein_coding_genes	0.243993824273425	basic_model	ZDBF2
log_likelihoods	protein_coding_genes	0.244351102780779	basic_model	IFNA7
log_likelihoods	protein_coding_genes	0.244643310360117	basic_model	LGALS13
log_likelihoods	protein_coding_genes	0.244745442854564	basic_model	RNASE12
log_likelihoods	protein_coding_genes	0.245074972287743	basic_model	CSMD3
log_likelihoods	protein_coding_genes	0.24511481016886	basic_model	C6orf47
log_likelihoods	protein_coding_genes	0.245498330408979	basic_model	VPS28
log_likelihoods	protein_coding_genes	0.245930546175749	basic_model	ARMC7
log_likelihoods	protein_coding_genes	0.245983349055485	basic_model	UGT1A10
log_likelihoods	protein_coding_genes	0.246087526609456	basic_model	SLC14A1
log_likelihoods	protein_coding_genes	0.246387840346041	basic_model	OR2B2
log_likelihoods	protein_coding_genes	0.246576467216996	basic_model	GABRD
log_likelihoods	protein_coding_genes	0.246788704207599	basic_model	PTPRB
log_likelihoods	protein_coding_genes	0.247066838973883	basic_model	RP11-817J15.3
log_likelihoods	protein_coding_genes	0.247459619839229	basic_model	RNLS
log_likelihoods	protein_coding_genes	0.247507456203713	basic_model	ELOVL7
log_likelihoods	protein_coding_genes	0.247530016444941	basic_model	SIRPG
log_likelihoods	protein_coding_genes	0.247879981239267	basic_model	EBAG9
log_likelihoods	protein_coding_genes	0.248103405534454	basic_model	WDR64
log_likelihoods	protein_coding_genes	0.248392716094273	basic_model	ISX
log_likelihoods	protein_coding_genes	0.248653625604328	basic_model	TMEM41B
log_likelihoods	protein_coding_genes	0.248662942416384	basic_model	RBM48
log_likelihoods	protein_coding_genes	0.248698265775285	basic_model	C8orf31
log_likelihoods	protein_coding_genes	0.248949546645468	basic_model	TP53INP1
log_likelihoods	protein_coding_genes	0.249093583396934	basic_model	C1orf51
log_likelihoods	protein_coding_genes	0.249296755286347	basic_model	CDC42
log_likelihoods	protein_coding_genes	0.24950348498179	basic_model	AC068533.7
log_likelihoods	protein_coding_genes	0.249740515911137	basic_model	CABS1
log_likelihoods	protein_coding_genes	0.249792025439828	basic_model	MEPE
log_likelihoods	protein_coding_genes	0.250388856447848	basic_model	C1QTNF1-AS1
log_likelihoods	protein_coding_genes	0.250866422023655	basic_model	SPINK6
log_likelihoods	protein_coding_genes	0.250867890987091	basic_model	LTA
log_likelihoods	protein_coding_genes	0.250899878940234	basic_model	EPO
log_likelihoods	protein_coding_genes	0.251031322809315	basic_model	HIST1H4G
log_likelihoods	protein_coding_genes	0.251191182856844	basic_model	GPR142
log_likelihoods	protein_coding_genes	0.251326721113676	basic_model	ANTXRL
log_likelihoods	protein_coding_genes	0.251565055803021	basic_model	IL6R
log_likelihoods	protein_coding_genes	0.251637266459078	basic_model	AIF1L
log_likelihoods	protein_coding_genes	0.252213815665421	basic_model	OR2T34
log_likelihoods	protein_coding_genes	0.252358073092008	basic_model	CST11
log_likelihoods	protein_coding_genes	0.25250326173953	basic_model	GABRA1
log_likelihoods	protein_coding_genes	0.25265483062118	basic_model	SLC16A12
log_likelihoods	protein_coding_genes	0.253012351237453	basic_model	RP11-315O6.2
log_likelihoods	protein_coding_genes	0.253404445230968	basic_model	PIWIL1
log_likelihoods	protein_coding_genes	0.253739806621708	basic_model	CTA-299D3.8
log_likelihoods	protein_coding_genes	0.253792082707814	basic_model	CTXN3
log_likelihoods	protein_coding_genes	0.254157978676993	basic_model	C12orf54
log_likelihoods	protein_coding_genes	0.254406277271811	basic_model	TRPS1
log_likelihoods	protein_coding_genes	0.254551787580061	basic_model	CACNA1G
log_likelihoods	protein_coding_genes	0.254789444516135	basic_model	DAO
log_likelihoods	protein_coding_genes	0.254868557466757	basic_model	SEC13
log_likelihoods	protein_coding_genes	0.255104877300884	basic_model	TSRM
log_likelihoods	protein_coding_genes	0.255182949674887	basic_model	ENPP6
log_likelihoods	protein_coding_genes	0.255437638171539	basic_model	OR10A3
log_likelihoods	protein_coding_genes	0.256015998904635	basic_model	OBFC1
log_likelihoods	protein_coding_genes	0.256068344298593	basic_model	CCM2
log_likelihoods	protein_coding_genes	0.256179571870915	basic_model	NF2
log_likelihoods	protein_coding_genes	0.256203841375233	basic_model	SLC38A4
log_likelihoods	protein_coding_genes	0.256336693754455	basic_model	DNAAF3
log_likelihoods	protein_coding_genes	0.256646142136172	basic_model	GPSM2
log_likelihoods	protein_coding_genes	0.25666207980892	basic_model	KRT40
log_likelihoods	protein_coding_genes	0.256765307666305	basic_model	NIF3L1
log_likelihoods	protein_coding_genes	0.256854255348512	basic_model	KRTAP4-1
log_likelihoods	protein_coding_genes	0.25753824599142	basic_model	WISP3
log_likelihoods	protein_coding_genes	0.257598261213642	basic_model	AC187652.1
log_likelihoods	protein_coding_genes	0.257617355691492	basic_model	SYT1
log_likelihoods	protein_coding_genes	0.257631776071966	basic_model	SYPL2
log_likelihoods	protein_coding_genes	0.257643857225226	basic_model	CES1
log_likelihoods	protein_coding_genes	0.258024601582496	basic_model	ARMS2
log_likelihoods	protein_coding_genes	0.258577721020989	basic_model	USE1
log_likelihoods	protein_coding_genes	0.258771842744092	basic_model	OR4X1
log_likelihoods	protein_coding_genes	0.258853039072605	basic_model	OR10G2
log_likelihoods	protein_coding_genes	0.258943401468436	basic_model	SLC17A4
log_likelihoods	protein_coding_genes	0.259042346619878	basic_model	PKD2L1
log_likelihoods	protein_coding_genes	0.259706314804972	basic_model	C20orf62
log_likelihoods	protein_coding_genes	0.259712644737854	basic_model	TMCC1
log_likelihoods	protein_coding_genes	0.259785346106358	basic_model	CFI
log_likelihoods	protein_coding_genes	0.260051829032329	basic_model	MYPN
log_likelihoods	protein_coding_genes	0.260163345421008	basic_model	OR51E2
log_likelihoods	protein_coding_genes	0.2603243725084	basic_model	PCDHA8
log_likelihoods	protein_coding_genes	0.260369310634656	basic_model	SCGB1C1
log_likelihoods	protein_coding_genes	0.260381847620779	basic_model	HAUS1
log_likelihoods	protein_coding_genes	0.260409140225286	basic_model	OR10Z1
log_likelihoods	protein_coding_genes	0.260569790831899	basic_model	CIB4
log_likelihoods	protein_coding_genes	0.260787801791879	basic_model	OR7G1
log_likelihoods	protein_coding_genes	0.260796657236303	basic_model	MAGOH
log_likelihoods	protein_coding_genes	0.260837882743131	basic_model	OCLM
log_likelihoods	protein_coding_genes	0.261531912697074	basic_model	PRND
log_likelihoods	protein_coding_genes	0.261732739761494	basic_model	RP11-1102P16.1
log_likelihoods	protein_coding_genes	0.262088153956016	basic_model	RAD51C
log_likelihoods	protein_coding_genes	0.26219226455024	basic_model	TRPM2
log_likelihoods	protein_coding_genes	0.26219565945098	basic_model	CUZD1
log_likelihoods	protein_coding_genes	0.26221411555317	basic_model	OR1N2
log_likelihoods	protein_coding_genes	0.262364647326441	basic_model	AMN1
log_likelihoods	protein_coding_genes	0.262491911262275	basic_model	RPL27
log_likelihoods	protein_coding_genes	0.262519716291867	basic_model	B3GALT2
log_likelihoods	protein_coding_genes	0.263280760516916	basic_model	KCNH5
log_likelihoods	protein_coding_genes	0.263545385887819	basic_model	P2RX3
log_likelihoods	protein_coding_genes	0.263556742336203	basic_model	OR4E2
log_likelihoods	protein_coding_genes	0.263853490861511	basic_model	TCEANC2
log_likelihoods	protein_coding_genes	0.264216636390019	basic_model	TRIT1
log_likelihoods	protein_coding_genes	0.264283390111618	basic_model	AC007461.1
log_likelihoods	protein_coding_genes	0.264423087353656	basic_model	LYSMD2
log_likelihoods	protein_coding_genes	0.264888408613349	basic_model	ARL11
log_likelihoods	protein_coding_genes	0.264909229506082	basic_model	IL24
log_likelihoods	protein_coding_genes	0.26502520010742	basic_model	SLN
log_likelihoods	protein_coding_genes	0.265115356179897	basic_model	HSPA8
log_likelihoods	protein_coding_genes	0.265146120273726	basic_model	ACSM4
log_likelihoods	protein_coding_genes	0.265184377383698	basic_model	MICALCL
log_likelihoods	protein_coding_genes	0.26534155509304	basic_model	CCL2
log_likelihoods	protein_coding_genes	0.265455393388497	basic_model	GSTP1
log_likelihoods	protein_coding_genes	0.265657717103239	basic_model	CPA1
log_likelihoods	protein_coding_genes	0.266047056169574	basic_model	DSG1
log_likelihoods	protein_coding_genes	0.26604970540006	basic_model	FLJ30594
log_likelihoods	protein_coding_genes	0.266412660081019	basic_model	RP11-247C2.2
log_likelihoods	protein_coding_genes	0.266575884863293	basic_model	AC008964.1
log_likelihoods	protein_coding_genes	0.266576144612288	basic_model	PRR23C
log_likelihoods	protein_coding_genes	0.266622949082772	basic_model	AL132989.1
log_likelihoods	protein_coding_genes	0.266665277380013	basic_model	AC040160.1
log_likelihoods	protein_coding_genes	0.266673714711423	basic_model	APOBEC3C
log_likelihoods	protein_coding_genes	0.266749813402452	basic_model	OR8B4
log_likelihoods	protein_coding_genes	0.267129071954621	basic_model	OR10J1
log_likelihoods	protein_coding_genes	0.267155085677288	basic_model	TEX101
log_likelihoods	protein_coding_genes	0.267384020347437	basic_model	TNNI2
log_likelihoods	protein_coding_genes	0.267430059779617	basic_model	LCA5L
log_likelihoods	protein_coding_genes	0.26756604495842	basic_model	RTN2
log_likelihoods	protein_coding_genes	0.267874046716082	basic_model	EMR2
log_likelihoods	protein_coding_genes	0.267939329690547	basic_model	NEUROD6
log_likelihoods	protein_coding_genes	0.268134861873342	basic_model	CCDC177
log_likelihoods	protein_coding_genes	0.268833098141156	basic_model	DNTTIP1
log_likelihoods	protein_coding_genes	0.268958243131093	basic_model	OR6C65
log_likelihoods	protein_coding_genes	0.269288709344858	basic_model	TMEM151A
log_likelihoods	protein_coding_genes	0.26929746745313	basic_model	SST
log_likelihoods	protein_coding_genes	0.269312882401199	basic_model	BROX
log_likelihoods	protein_coding_genes	0.269491768297424	basic_model	OSMR
log_likelihoods	protein_coding_genes	0.26960111596125	basic_model	RDH8
log_likelihoods	protein_coding_genes	0.269757521352635	basic_model	PDZD9
log_likelihoods	protein_coding_genes	0.269981676928999	basic_model	AC027309.1
log_likelihoods	protein_coding_genes	0.270038265876823	basic_model	SEC61B
log_likelihoods	protein_coding_genes	0.270096409811363	basic_model	INMT
log_likelihoods	protein_coding_genes	0.270596549149893	basic_model	BATF
log_likelihoods	protein_coding_genes	0.271003818046943	basic_model	RASL10B
log_likelihoods	protein_coding_genes	0.271077098205041	basic_model	TRHR
log_likelihoods	protein_coding_genes	0.271092904147987	basic_model	DAND5
log_likelihoods	protein_coding_genes	0.271095917391043	basic_model	NTRK1
log_likelihoods	protein_coding_genes	0.271228734153763	basic_model	OR9Q1
log_likelihoods	protein_coding_genes	0.271231681422735	basic_model	ATCAY
log_likelihoods	protein_coding_genes	0.271533824246352	basic_model	FOLH1
log_likelihoods	protein_coding_genes	0.271594167796657	basic_model	SCAMP5
log_likelihoods	protein_coding_genes	0.271594619430634	basic_model	STRA8
log_likelihoods	protein_coding_genes	0.271623313000402	basic_model	MAS1
log_likelihoods	protein_coding_genes	0.271928416838255	basic_model	SCARA5
log_likelihoods	protein_coding_genes	0.271929728373719	basic_model	CABP4
log_likelihoods	protein_coding_genes	0.272328455017504	basic_model	ABHD4
log_likelihoods	protein_coding_genes	0.273587717050484	basic_model	NPY
log_likelihoods	protein_coding_genes	0.273681526060416	basic_model	SLC35G2
log_likelihoods	protein_coding_genes	0.273834112791633	basic_model	AC026703.1
log_likelihoods	protein_coding_genes	0.273969782734799	basic_model	CDCA7
log_likelihoods	protein_coding_genes	0.274075210980001	basic_model	NXNL1
log_likelihoods	protein_coding_genes	0.274182221108902	basic_model	OR4A47
log_likelihoods	protein_coding_genes	0.274201436630809	basic_model	NDUFS5
log_likelihoods	protein_coding_genes	0.274634446312851	basic_model	MSI1
log_likelihoods	protein_coding_genes	0.274649526117606	basic_model	ATF3
log_likelihoods	protein_coding_genes	0.274950706086497	basic_model	C5orf48
log_likelihoods	protein_coding_genes	0.274985969762231	basic_model	AP002884.3
log_likelihoods	protein_coding_genes	0.275792489593496	basic_model	AC002451.1
log_likelihoods	protein_coding_genes	0.276160799979812	basic_model	LCE1E
log_likelihoods	protein_coding_genes	0.276235620704536	basic_model	REN
log_likelihoods	protein_coding_genes	0.276479505579504	basic_model	PLEK
log_likelihoods	protein_coding_genes	0.276518398370873	basic_model	CFTR
log_likelihoods	protein_coding_genes	0.276750668318693	basic_model	CNN1
log_likelihoods	protein_coding_genes	0.276754711596803	basic_model	AC138393.1
log_likelihoods	protein_coding_genes	0.277028699158617	basic_model	OR52B1P
log_likelihoods	protein_coding_genes	0.277047423887453	basic_model	C19orf69
log_likelihoods	protein_coding_genes	0.27711716980483	basic_model	PADI3
log_likelihoods	protein_coding_genes	0.277148857248325	basic_model	CCR8
log_likelihoods	protein_coding_genes	0.277217120958611	basic_model	IFNL2
log_likelihoods	protein_coding_genes	0.27730106617082	basic_model	ZNF728
log_likelihoods	protein_coding_genes	0.277334121816141	basic_model	PROK1
log_likelihoods	protein_coding_genes	0.277499259037873	basic_model	INTS10
log_likelihoods	protein_coding_genes	0.277629930082058	basic_model	OR14J1
log_likelihoods	protein_coding_genes	0.27780875599468	basic_model	AL079342.1
log_likelihoods	protein_coding_genes	0.278051218215992	basic_model	OR2AE1
log_likelihoods	protein_coding_genes	0.278353130434026	basic_model	OR8J3
log_likelihoods	protein_coding_genes	0.278747151833787	basic_model	ZNF20
log_likelihoods	protein_coding_genes	0.278913635810951	basic_model	MC2R
log_likelihoods	protein_coding_genes	0.278955187997381	basic_model	AC006372.1
log_likelihoods	protein_coding_genes	0.27900697280417	basic_model	RBFOX1
log_likelihoods	protein_coding_genes	0.279273926810871	basic_model	ARMC1
log_likelihoods	protein_coding_genes	0.279377475505754	basic_model	CFHR2
log_likelihoods	protein_coding_genes	0.279476193476972	basic_model	PSMA6
log_likelihoods	protein_coding_genes	0.279642482680654	basic_model	OR4K17
log_likelihoods	protein_coding_genes	0.280394224241243	basic_model	CTD-3105H18.16
log_likelihoods	protein_coding_genes	0.280612037107602	basic_model	BCMO1
log_likelihoods	protein_coding_genes	0.280621265585061	basic_model	AC012215.1
log_likelihoods	protein_coding_genes	0.280799737195015	basic_model	REEP2
log_likelihoods	protein_coding_genes	0.281137390099126	basic_model	SERPINB13
log_likelihoods	protein_coding_genes	0.281138363856404	basic_model	VAMP1
log_likelihoods	protein_coding_genes	0.281253621282625	basic_model	KRTAP4-6
log_likelihoods	protein_coding_genes	0.281572614467286	basic_model	AC009892.10
log_likelihoods	protein_coding_genes	0.281638115903121	basic_model	AP000721.4
log_likelihoods	protein_coding_genes	0.281666771811281	basic_model	LGALS16
log_likelihoods	protein_coding_genes	0.282122823851205	basic_model	HRCT1
log_likelihoods	protein_coding_genes	0.282208699072109	basic_model	PAPL
log_likelihoods	protein_coding_genes	0.282868093286717	basic_model	MYT1L
log_likelihoods	protein_coding_genes	0.282870964342002	basic_model	HSBP1L1
log_likelihoods	protein_coding_genes	0.282931277584621	basic_model	SFTPA2
log_likelihoods	protein_coding_genes	0.283221574568458	basic_model	PRDX1
log_likelihoods	protein_coding_genes	0.283227740936851	basic_model	EFCAB8
log_likelihoods	protein_coding_genes	0.283290525160568	basic_model	AC119673.1
log_likelihoods	protein_coding_genes	0.283608895507454	basic_model	SLFN12L
log_likelihoods	protein_coding_genes	0.283650614588569	basic_model	POU1F1
log_likelihoods	protein_coding_genes	0.284116729350059	basic_model	LRRC30
log_likelihoods	protein_coding_genes	0.284389778823876	basic_model	COPB1
log_likelihoods	protein_coding_genes	0.284647944046694	basic_model	ARIH2OS
log_likelihoods	protein_coding_genes	0.284730198641128	basic_model	PRR23A
log_likelihoods	protein_coding_genes	0.284920025100696	basic_model	CPA2
log_likelihoods	protein_coding_genes	0.285279667922328	basic_model	PRAC1
log_likelihoods	protein_coding_genes	0.285335573302817	basic_model	RBBP8NL
log_likelihoods	protein_coding_genes	0.285634904431556	basic_model	OR11L1
log_likelihoods	protein_coding_genes	0.285775643607644	basic_model	TNFSF14
log_likelihoods	protein_coding_genes	0.285779840381093	basic_model	HMGN4
log_likelihoods	protein_coding_genes	0.285854030425027	basic_model	CLEC9A
log_likelihoods	protein_coding_genes	0.285931599322265	basic_model	ZDHHC6
log_likelihoods	protein_coding_genes	0.286040710216161	basic_model	RTL1
log_likelihoods	protein_coding_genes	0.286270423726317	basic_model	KIAA0040
log_likelihoods	protein_coding_genes	0.2862905066275	basic_model	C7orf33
log_likelihoods	protein_coding_genes	0.28662138226932	basic_model	TINF2
log_likelihoods	protein_coding_genes	0.286766131172147	basic_model	LUM
log_likelihoods	protein_coding_genes	0.286928380077177	basic_model	GOPC
log_likelihoods	protein_coding_genes	0.286944182832966	basic_model	GABRG1
log_likelihoods	protein_coding_genes	0.287162304388772	basic_model	C9orf43
log_likelihoods	protein_coding_genes	0.287428948417645	basic_model	GPX5
log_likelihoods	protein_coding_genes	0.287948245292672	basic_model	CHIC2
log_likelihoods	protein_coding_genes	0.288617879846933	basic_model	SMCO1
log_likelihoods	protein_coding_genes	0.288689851281477	basic_model	OR8D2
log_likelihoods	protein_coding_genes	0.288706927602531	basic_model	SFXN2
log_likelihoods	protein_coding_genes	0.288803635215231	basic_model	UBE2E3
log_likelihoods	protein_coding_genes	0.288819799490716	basic_model	ADIPOQ
log_likelihoods	protein_coding_genes	0.288886025205649	basic_model	CLDN16
log_likelihoods	protein_coding_genes	0.28889932349394	basic_model	SERF2
log_likelihoods	protein_coding_genes	0.28901280124053	basic_model	ZDHHC4
log_likelihoods	protein_coding_genes	0.289146832132989	basic_model	SLC13A2
log_likelihoods	protein_coding_genes	0.289199562822359	basic_model	GKN1
log_likelihoods	protein_coding_genes	0.289235472662579	basic_model	ARL9
log_likelihoods	protein_coding_genes	0.289288704681379	basic_model	RPL18
log_likelihoods	protein_coding_genes	0.289288909505011	basic_model	KIAA1257
log_likelihoods	protein_coding_genes	0.289543324972118	basic_model	ZNF768
log_likelihoods	protein_coding_genes	0.289558531035245	basic_model	AKR1B15
log_likelihoods	protein_coding_genes	0.289588233556927	basic_model	C16orf87
log_likelihoods	protein_coding_genes	0.28959787297493	basic_model	TNP1
log_likelihoods	protein_coding_genes	0.289646069901201	basic_model	LCE2C
log_likelihoods	protein_coding_genes	0.289650764457169	basic_model	FDCSP
log_likelihoods	protein_coding_genes	0.289886608293726	basic_model	OCM
log_likelihoods	protein_coding_genes	0.290039577116337	basic_model	AQP5
log_likelihoods	protein_coding_genes	0.290263402890207	basic_model	RP11-368I7.4
log_likelihoods	protein_coding_genes	0.290353764830716	basic_model	UGT2B4
log_likelihoods	protein_coding_genes	0.290421701292554	basic_model	SLC1A3
log_likelihoods	protein_coding_genes	0.290529644991947	basic_model	TNFRSF9
log_likelihoods	protein_coding_genes	0.290632250099755	basic_model	LCE4A
log_likelihoods	protein_coding_genes	0.2906904232169	basic_model	CLDN25
log_likelihoods	protein_coding_genes	0.290841623795181	basic_model	CCDC38
log_likelihoods	protein_coding_genes	0.290994955858693	basic_model	TTL
log_likelihoods	protein_coding_genes	0.2910578794609	basic_model	IFNA4
log_likelihoods	protein_coding_genes	0.291091601537306	basic_model	CD300C
log_likelihoods	protein_coding_genes	0.29117112141528	basic_model	SERPINB10
log_likelihoods	protein_coding_genes	0.291211515046492	basic_model	CD1A
log_likelihoods	protein_coding_genes	0.291362085484571	basic_model	COMMD9
log_likelihoods	protein_coding_genes	0.291372150758925	basic_model	OBP2A
log_likelihoods	protein_coding_genes	0.291464649335269	basic_model	LCE3D
log_likelihoods	protein_coding_genes	0.291940353741519	basic_model	UBC
log_likelihoods	protein_coding_genes	0.292044256302341	basic_model	ZNF706
log_likelihoods	protein_coding_genes	0.292413771874411	basic_model	ALDOB
log_likelihoods	protein_coding_genes	0.293170160906722	basic_model	TAGLN3
log_likelihoods	protein_coding_genes	0.293758812543906	basic_model	CHCHD4
log_likelihoods	protein_coding_genes	0.294165099789894	basic_model	CLEC4A
log_likelihoods	protein_coding_genes	0.294827958606511	basic_model	AOC3
log_likelihoods	protein_coding_genes	0.294967157510997	basic_model	ZNF788
log_likelihoods	protein_coding_genes	0.295079893691711	basic_model	CLEC2L
log_likelihoods	protein_coding_genes	0.295111445370973	basic_model	NDUFA7
log_likelihoods	protein_coding_genes	0.295278856086005	basic_model	AC107021.1
log_likelihoods	protein_coding_genes	0.295315670921896	basic_model	AL627171.2
log_likelihoods	protein_coding_genes	0.295517238517628	basic_model	GLYATL2
log_likelihoods	protein_coding_genes	0.295725121288241	basic_model	NTRK3
log_likelihoods	protein_coding_genes	0.295768767011555	basic_model	CNGB3
log_likelihoods	protein_coding_genes	0.295914187146419	basic_model	KRTAP20-4
log_likelihoods	protein_coding_genes	0.295974339988473	basic_model	KRTAP13-1
log_likelihoods	protein_coding_genes	0.295998302869993	basic_model	SERPINB4
log_likelihoods	protein_coding_genes	0.296134257631873	basic_model	AC073528.1
log_likelihoods	protein_coding_genes	0.29616448689337	basic_model	STARD6
log_likelihoods	protein_coding_genes	0.296318844250191	basic_model	DGAT2
log_likelihoods	protein_coding_genes	0.296343337622368	basic_model	MAP2K1
log_likelihoods	protein_coding_genes	0.296531719166859	basic_model	MS4A3
log_likelihoods	protein_coding_genes	0.296626608100534	basic_model	RGS10
log_likelihoods	protein_coding_genes	0.296655814822605	basic_model	ALPI
log_likelihoods	protein_coding_genes	0.29682491151276	basic_model	KIF17
log_likelihoods	protein_coding_genes	0.297317612548352	basic_model	AHSG
log_likelihoods	protein_coding_genes	0.297636775926629	basic_model	OR4C13
log_likelihoods	protein_coding_genes	0.297861565930258	basic_model	KHK
log_likelihoods	protein_coding_genes	0.297917789688508	basic_model	NANOG
log_likelihoods	protein_coding_genes	0.297951700786623	basic_model	PRED62
log_likelihoods	protein_coding_genes	0.297997621305284	basic_model	SPINK7
log_likelihoods	protein_coding_genes	0.298009040534809	basic_model	VSTM4
log_likelihoods	protein_coding_genes	0.298197084045817	basic_model	N6AMT2
log_likelihoods	protein_coding_genes	0.298570023673677	basic_model	POLR2L
log_likelihoods	protein_coding_genes	0.299038209361326	basic_model	OR4A5
log_likelihoods	protein_coding_genes	0.299270495357673	basic_model	OR2S2
log_likelihoods	protein_coding_genes	0.299818078602168	basic_model	RP11-865B13.1
log_likelihoods	protein_coding_genes	0.299820800485705	basic_model	RAB8B
log_likelihoods	protein_coding_genes	0.299842892258773	basic_model	RGS21
log_likelihoods	protein_coding_genes	0.300026230781858	basic_model	MRPS12
log_likelihoods	protein_coding_genes	0.300041084351922	basic_model	NGF
log_likelihoods	protein_coding_genes	0.300176602784123	basic_model	AL354808.2
log_likelihoods	protein_coding_genes	0.300317793339886	basic_model	FKBP2
log_likelihoods	protein_coding_genes	0.300675669559904	basic_model	PHLDB2
log_likelihoods	protein_coding_genes	0.300881579761376	basic_model	AC099552.4
log_likelihoods	protein_coding_genes	0.300993309421084	basic_model	UGT3A2
log_likelihoods	protein_coding_genes	0.301257562667293	basic_model	AL049840.1
log_likelihoods	protein_coding_genes	0.301643547731888	basic_model	CREG2
log_likelihoods	protein_coding_genes	0.301797422388002	basic_model	C2orf68
log_likelihoods	protein_coding_genes	0.301924077125089	basic_model	RP11-433C9.2
log_likelihoods	protein_coding_genes	0.30204644807982	basic_model	C15orf65
log_likelihoods	protein_coding_genes	0.302246711309072	basic_model	OR51Q1
log_likelihoods	protein_coding_genes	0.302259848841335	basic_model	TRIM48
log_likelihoods	protein_coding_genes	0.302398876987955	basic_model	SF3B1
log_likelihoods	protein_coding_genes	0.302676909212549	basic_model	SLCO1C1
log_likelihoods	protein_coding_genes	0.30280313510239	basic_model	SERTAD1
log_likelihoods	protein_coding_genes	0.302830678194556	basic_model	C16orf78
log_likelihoods	protein_coding_genes	0.303160178148314	basic_model	PFN4
log_likelihoods	protein_coding_genes	0.303545217243901	basic_model	CHMP6
log_likelihoods	protein_coding_genes	0.303617203146965	basic_model	IGFL2
log_likelihoods	protein_coding_genes	0.303740540809055	basic_model	IFNA2
log_likelihoods	protein_coding_genes	0.303873146116975	basic_model	ERGIC3
log_likelihoods	protein_coding_genes	0.304039127209915	basic_model	MRPS18A
log_likelihoods	protein_coding_genes	0.30421652640789	basic_model	B3GALT1
log_likelihoods	protein_coding_genes	0.304221719462574	basic_model	C1orf234
log_likelihoods	protein_coding_genes	0.304339562315122	basic_model	TSPO2
log_likelihoods	protein_coding_genes	0.304346382240662	basic_model	TNN
log_likelihoods	protein_coding_genes	0.304456518516378	basic_model	ACSM5
log_likelihoods	protein_coding_genes	0.304482132085305	basic_model	LGR5
log_likelihoods	protein_coding_genes	0.304540798930311	basic_model	CASQ2
log_likelihoods	protein_coding_genes	0.304588817961824	basic_model	NODAL
log_likelihoods	protein_coding_genes	0.304784925119991	basic_model	CLDN6
log_likelihoods	protein_coding_genes	0.304910729431063	basic_model	TPPP2
log_likelihoods	protein_coding_genes	0.30518388073474	basic_model	SERPINB7
log_likelihoods	protein_coding_genes	0.30540010277131	basic_model	CCNE2
log_likelihoods	protein_coding_genes	0.305485606660288	basic_model	CLDN1
log_likelihoods	protein_coding_genes	0.305599036514869	basic_model	CAGE1
log_likelihoods	protein_coding_genes	0.305735529316197	basic_model	ST8SIA3
log_likelihoods	protein_coding_genes	0.305808364977896	basic_model	SFN
log_likelihoods	protein_coding_genes	0.306127600501407	basic_model	PITHD1
log_likelihoods	protein_coding_genes	0.30642782418288	basic_model	MND1
log_likelihoods	protein_coding_genes	0.306525383213374	basic_model	TREML2
log_likelihoods	protein_coding_genes	0.306620747615228	basic_model	FLJ20306
log_likelihoods	protein_coding_genes	0.30663958457657	basic_model	SNRNP27
log_likelihoods	protein_coding_genes	0.306682272360249	basic_model	CTD-3214H19.16
log_likelihoods	protein_coding_genes	0.306916699247991	basic_model	NDUFC1
log_likelihoods	protein_coding_genes	0.306950328683571	basic_model	OR56A4
log_likelihoods	protein_coding_genes	0.306992220363986	basic_model	ZDHHC11
log_likelihoods	protein_coding_genes	0.30699652205518	basic_model	GSDMB
log_likelihoods	protein_coding_genes	0.307603834934962	basic_model	RP11-47I22.4
log_likelihoods	protein_coding_genes	0.307746783623279	basic_model	FBLIM1
log_likelihoods	protein_coding_genes	0.307795294849136	basic_model	HM13
log_likelihoods	protein_coding_genes	0.30784769397684	basic_model	HP1BP3
log_likelihoods	protein_coding_genes	0.307964864001697	basic_model	AC136297.1
log_likelihoods	protein_coding_genes	0.308156173376969	basic_model	RALB
log_likelihoods	protein_coding_genes	0.308225483737221	basic_model	TMEM54
log_likelihoods	protein_coding_genes	0.308264292361411	basic_model	FASLG
log_likelihoods	protein_coding_genes	0.308406566913945	basic_model	IL11RA
log_likelihoods	protein_coding_genes	0.308548254963571	basic_model	SYT17
log_likelihoods	protein_coding_genes	0.308731056253316	basic_model	C8orf34
log_likelihoods	protein_coding_genes	0.308775955607428	basic_model	HLTF
log_likelihoods	protein_coding_genes	0.308956619854404	basic_model	EVPLL
log_likelihoods	protein_coding_genes	0.308972872604871	basic_model	NSMCE2
log_likelihoods	protein_coding_genes	0.30922758794693	basic_model	CSN1S1
log_likelihoods	protein_coding_genes	0.309503204850669	basic_model	C19orf80
log_likelihoods	protein_coding_genes	0.30956051783197	basic_model	DCAF12
log_likelihoods	protein_coding_genes	0.309575334699932	basic_model	GPX6
log_likelihoods	protein_coding_genes	0.309585361452167	basic_model	CCDC40
log_likelihoods	protein_coding_genes	0.310293025538811	basic_model	ABHD17B
log_likelihoods	protein_coding_genes	0.31067543738234	basic_model	CTB-102L5.4
log_likelihoods	protein_coding_genes	0.310708326737493	basic_model	MROH8
log_likelihoods	protein_coding_genes	0.310738460295394	basic_model	IQCF1
log_likelihoods	protein_coding_genes	0.311164793424536	basic_model	ERCC2
log_likelihoods	protein_coding_genes	0.311589411163533	basic_model	RTBDN
log_likelihoods	protein_coding_genes	0.311659591285889	basic_model	RAB7A
log_likelihoods	protein_coding_genes	0.311665335045863	basic_model	C20orf196
log_likelihoods	protein_coding_genes	0.31203851425171	basic_model	OR8D4
log_likelihoods	protein_coding_genes	0.312272213391921	basic_model	PCDH18
log_likelihoods	protein_coding_genes	0.312727643392849	basic_model	ANKRD60
log_likelihoods	protein_coding_genes	0.313003120427701	basic_model	AL162407.1
log_likelihoods	protein_coding_genes	0.313216606735963	basic_model	PDC
log_likelihoods	protein_coding_genes	0.313233071277559	basic_model	HRG
log_likelihoods	protein_coding_genes	0.31323707661237	basic_model	OR56B1
log_likelihoods	protein_coding_genes	0.313408310867207	basic_model	KRTAP22-2
log_likelihoods	protein_coding_genes	0.31352614062466	basic_model	AC226150.4
log_likelihoods	protein_coding_genes	0.313686688301373	basic_model	CDC42EP1
log_likelihoods	protein_coding_genes	0.313709158966966	basic_model	OR2AG2
log_likelihoods	protein_coding_genes	0.313892097826452	basic_model	TSHB
log_likelihoods	protein_coding_genes	0.31398359512786	basic_model	CCDC170
log_likelihoods	protein_coding_genes	0.314018489794975	basic_model	PDE6A
log_likelihoods	protein_coding_genes	0.3141064367086	basic_model	SLC1A6
log_likelihoods	protein_coding_genes	0.314119769973931	basic_model	CEBPE
log_likelihoods	protein_coding_genes	0.314400669928251	basic_model	C14orf164
log_likelihoods	protein_coding_genes	0.314410388781966	basic_model	RBM8A
log_likelihoods	protein_coding_genes	0.314680629542988	basic_model	FLNC
log_likelihoods	protein_coding_genes	0.315567185862652	basic_model	SLITRK3
log_likelihoods	protein_coding_genes	0.315605653400487	basic_model	PTRH2
log_likelihoods	protein_coding_genes	0.315700674130055	basic_model	OR12D3
log_likelihoods	protein_coding_genes	0.315809283800684	basic_model	LDHAL6A
log_likelihoods	protein_coding_genes	0.315946984896591	basic_model	CHIA
log_likelihoods	protein_coding_genes	0.316003063029405	basic_model	CD177
log_likelihoods	protein_coding_genes	0.316006686859981	basic_model	TMEM160
log_likelihoods	protein_coding_genes	0.316208150619428	basic_model	TEX33
log_likelihoods	protein_coding_genes	0.316366659912806	basic_model	IFNA16
log_likelihoods	protein_coding_genes	0.316378375697994	basic_model	COMMD5
log_likelihoods	protein_coding_genes	0.316492759206311	basic_model	NPCDR1
log_likelihoods	protein_coding_genes	0.316551870112801	basic_model	PLCL2
log_likelihoods	protein_coding_genes	0.316681475842331	basic_model	LILRB2
log_likelihoods	protein_coding_genes	0.316691675270377	basic_model	CACNG6
log_likelihoods	protein_coding_genes	0.316878400456239	basic_model	CAV3
log_likelihoods	protein_coding_genes	0.317043079580846	basic_model	CHST5
log_likelihoods	protein_coding_genes	0.317660727084535	basic_model	OPCML
log_likelihoods	protein_coding_genes	0.317683319811389	basic_model	OR7A10
log_likelihoods	protein_coding_genes	0.317709494433447	basic_model	TRIM46
log_likelihoods	protein_coding_genes	0.317744005233399	basic_model	OR2M7
log_likelihoods	protein_coding_genes	0.317839366392991	basic_model	OR10Q1
log_likelihoods	protein_coding_genes	0.31785414782426	basic_model	NOLC1
log_likelihoods	protein_coding_genes	0.3179782643058	basic_model	TAS2R13
log_likelihoods	protein_coding_genes	0.31809456067832	basic_model	MAP2K4
log_likelihoods	protein_coding_genes	0.318267894898697	basic_model	LIMA1
log_likelihoods	protein_coding_genes	0.318380822322862	basic_model	STAC
log_likelihoods	protein_coding_genes	0.319027792579845	basic_model	MPHOSPH6
log_likelihoods	protein_coding_genes	0.319204593264103	basic_model	S100A11
log_likelihoods	protein_coding_genes	0.319495819678207	basic_model	SLC25A18
log_likelihoods	protein_coding_genes	0.319670773061941	basic_model	IRGM
log_likelihoods	protein_coding_genes	0.319909712047561	basic_model	PDZD7
log_likelihoods	protein_coding_genes	0.319987542101094	basic_model	SDK2
log_likelihoods	protein_coding_genes	0.320038002152324	basic_model	TMEM14B
log_likelihoods	protein_coding_genes	0.320186461827307	basic_model	AL359195.1
log_likelihoods	protein_coding_genes	0.320317561229425	basic_model	ZDHHC1
log_likelihoods	protein_coding_genes	0.320429320495509	basic_model	VAPB
log_likelihoods	protein_coding_genes	0.320615727142774	basic_model	MUC7
log_likelihoods	protein_coding_genes	0.320798341965574	basic_model	FAM159A
log_likelihoods	protein_coding_genes	0.320980297084487	basic_model	SUV39H2
log_likelihoods	protein_coding_genes	0.320989880337403	basic_model	AC008948.1
log_likelihoods	protein_coding_genes	0.321347009844177	basic_model	SLC1A2
log_likelihoods	protein_coding_genes	0.321511826975096	basic_model	CLDN18
log_likelihoods	protein_coding_genes	0.321615212695709	basic_model	C7orf31
log_likelihoods	protein_coding_genes	0.321777978230593	basic_model	KRT222
log_likelihoods	protein_coding_genes	0.321791498733945	basic_model	GPR55
log_likelihoods	protein_coding_genes	0.321899090830306	basic_model	DNAJC5B
log_likelihoods	protein_coding_genes	0.321903989949542	basic_model	MME
log_likelihoods	protein_coding_genes	0.322006247152948	basic_model	CYP4A22
log_likelihoods	protein_coding_genes	0.32223040872744	basic_model	UPB1
log_likelihoods	protein_coding_genes	0.322273393153756	basic_model	OR10A6
log_likelihoods	protein_coding_genes	0.32232666451324	basic_model	DDRGK1
log_likelihoods	protein_coding_genes	0.322433565625538	basic_model	CORO1C
log_likelihoods	protein_coding_genes	0.322444586026267	basic_model	DNAH17-AS1
log_likelihoods	protein_coding_genes	0.322536153198871	basic_model	TLL1
log_likelihoods	protein_coding_genes	0.322547313995301	basic_model	PSMA7
log_likelihoods	protein_coding_genes	0.322869889469584	basic_model	DPCR1
log_likelihoods	protein_coding_genes	0.322925800502096	basic_model	C11orf86
log_likelihoods	protein_coding_genes	0.323011647086371	basic_model	PFDN5
log_likelihoods	protein_coding_genes	0.323317455732239	basic_model	C21orf90
log_likelihoods	protein_coding_genes	0.323579089098947	basic_model	KCND2
log_likelihoods	protein_coding_genes	0.323710085562439	basic_model	SPATA32
log_likelihoods	protein_coding_genes	0.323723667487216	basic_model	ZG16
log_likelihoods	protein_coding_genes	0.32373656586064	basic_model	MIA2
log_likelihoods	protein_coding_genes	0.32382493406251	basic_model	KRTAP10-1
log_likelihoods	protein_coding_genes	0.324102839911265	basic_model	OR51S1
log_likelihoods	protein_coding_genes	0.324142688697352	basic_model	ATP6V1E2
log_likelihoods	protein_coding_genes	0.32425685545805	basic_model	RPL15
log_likelihoods	protein_coding_genes	0.32426576990975	basic_model	C2orf83
log_likelihoods	protein_coding_genes	0.324277782770244	basic_model	INTS5
log_likelihoods	protein_coding_genes	0.324304051694144	basic_model	MRPL52
log_likelihoods	protein_coding_genes	0.32438326712526	basic_model	LCE1D
log_likelihoods	protein_coding_genes	0.32448070589769	basic_model	OR2G2
log_likelihoods	protein_coding_genes	0.324486549472304	basic_model	CLPSL2
log_likelihoods	protein_coding_genes	0.324682596527886	basic_model	ANKRD30B
log_likelihoods	protein_coding_genes	0.324866470558977	basic_model	AL133262.1
log_likelihoods	protein_coding_genes	0.325076379730362	basic_model	LYZL4
log_likelihoods	protein_coding_genes	0.325172616776123	basic_model	TMEM132B
log_likelihoods	protein_coding_genes	0.325390391643576	basic_model	AP000295.9
log_likelihoods	protein_coding_genes	0.325442416053255	basic_model	ZNF93
log_likelihoods	protein_coding_genes	0.325825810538859	basic_model	MRPL51
log_likelihoods	protein_coding_genes	0.325833337033499	basic_model	KPNA4
log_likelihoods	protein_coding_genes	0.32637231620228	basic_model	IL20
log_likelihoods	protein_coding_genes	0.32652891700023	basic_model	PARPBP
log_likelihoods	protein_coding_genes	0.326574687207081	basic_model	CLMP
log_likelihoods	protein_coding_genes	0.326613214227732	basic_model	CA7
log_likelihoods	protein_coding_genes	0.326724060584327	basic_model	OR52B2
log_likelihoods	protein_coding_genes	0.326846558405286	basic_model	PPBP
log_likelihoods	protein_coding_genes	0.326935722790289	basic_model	GATAD2B
log_likelihoods	protein_coding_genes	0.326978450515459	basic_model	FAU
log_likelihoods	protein_coding_genes	0.327353562354607	basic_model	HEG1
log_likelihoods	protein_coding_genes	0.327418593873036	basic_model	SLC30A9
log_likelihoods	protein_coding_genes	0.328126912875808	basic_model	SZRD1
log_likelihoods	protein_coding_genes	0.32869911275973	basic_model	RP11-379H8.1
log_likelihoods	protein_coding_genes	0.328788069131343	basic_model	TGM2
log_likelihoods	protein_coding_genes	0.329030132929713	basic_model	IGF1
log_likelihoods	protein_coding_genes	0.329185390966034	basic_model	LCE5A
log_likelihoods	protein_coding_genes	0.329313266524538	basic_model	CD163L1
log_likelihoods	protein_coding_genes	0.32931677639054	basic_model	C9orf37
log_likelihoods	protein_coding_genes	0.32938569964756	basic_model	INSL4
log_likelihoods	protein_coding_genes	0.329446700173499	basic_model	DUSP19
log_likelihoods	protein_coding_genes	0.329491978476292	basic_model	AL133318.1
log_likelihoods	protein_coding_genes	0.329741700353889	basic_model	LINC00908
log_likelihoods	protein_coding_genes	0.329792139877082	basic_model	ECSCR
log_likelihoods	protein_coding_genes	0.329904881004893	basic_model	KRT17
log_likelihoods	protein_coding_genes	0.330175213848334	basic_model	AC114783.1
log_likelihoods	protein_coding_genes	0.330482277117944	basic_model	SPACA7
log_likelihoods	protein_coding_genes	0.330670800615825	basic_model	PPAPDC3
log_likelihoods	protein_coding_genes	0.330843588971797	basic_model	FAM181A
log_likelihoods	protein_coding_genes	0.330966026766152	basic_model	AIM1
log_likelihoods	protein_coding_genes	0.331324274321031	basic_model	MROH2A
log_likelihoods	protein_coding_genes	0.331341170871981	basic_model	PTX4
log_likelihoods	protein_coding_genes	0.331538736513267	basic_model	CNTN3
log_likelihoods	protein_coding_genes	0.331850803646022	basic_model	AQP10
log_likelihoods	protein_coding_genes	0.332196127447932	basic_model	LYRM7
log_likelihoods	protein_coding_genes	0.332283148509799	basic_model	C1orf186
log_likelihoods	protein_coding_genes	0.332357075960615	basic_model	TPD52L3
log_likelihoods	protein_coding_genes	0.332422786873157	basic_model	OR2C1
log_likelihoods	protein_coding_genes	0.332463238359374	basic_model	RASAL1
log_likelihoods	protein_coding_genes	0.332542151238031	basic_model	COX6A1
log_likelihoods	protein_coding_genes	0.33266763322678	basic_model	LIFR
log_likelihoods	protein_coding_genes	0.332686040881572	basic_model	HIGD1C
log_likelihoods	protein_coding_genes	0.332713172509148	basic_model	OR10G6
log_likelihoods	protein_coding_genes	0.332865928728634	basic_model	ARL2BP
log_likelihoods	protein_coding_genes	0.332868582967215	basic_model	C8G
log_likelihoods	protein_coding_genes	0.333407831126947	basic_model	SELT
log_likelihoods	protein_coding_genes	0.333656934561907	basic_model	OR51J1
log_likelihoods	protein_coding_genes	0.333837616556965	basic_model	CERS2
log_likelihoods	protein_coding_genes	0.333882589487689	basic_model	CLIC4
log_likelihoods	protein_coding_genes	0.334074545457595	basic_model	DRD2
log_likelihoods	protein_coding_genes	0.334239610134519	basic_model	GJB4
log_likelihoods	protein_coding_genes	0.334316124029475	basic_model	AFMID
log_likelihoods	protein_coding_genes	0.33452882632539	basic_model	AP000349.1
log_likelihoods	protein_coding_genes	0.334548064081116	basic_model	PTPRJ
log_likelihoods	protein_coding_genes	0.334825309873802	basic_model	BCAS1
log_likelihoods	protein_coding_genes	0.334914885342912	basic_model	CA9
log_likelihoods	protein_coding_genes	0.335299621360477	basic_model	OR10K2
log_likelihoods	protein_coding_genes	0.33537653755229	basic_model	CYP8B1
log_likelihoods	protein_coding_genes	0.335503220892818	basic_model	RPTN
log_likelihoods	protein_coding_genes	0.33553802590292	basic_model	AP001885.1
log_likelihoods	protein_coding_genes	0.335540598465296	basic_model	RP11-155D18.14
log_likelihoods	protein_coding_genes	0.335832179316104	basic_model	PLD3
log_likelihoods	protein_coding_genes	0.335984660195258	basic_model	GPNMB
log_likelihoods	protein_coding_genes	0.336363713725526	basic_model	APCS
log_likelihoods	protein_coding_genes	0.336538785958003	basic_model	RRP36
log_likelihoods	protein_coding_genes	0.336591748031366	basic_model	RAB4B
log_likelihoods	protein_coding_genes	0.336948569772432	basic_model	TUBB8
log_likelihoods	protein_coding_genes	0.336979099278772	basic_model	MCU
log_likelihoods	protein_coding_genes	0.33718794760485	basic_model	PCTP
log_likelihoods	protein_coding_genes	0.337248050447861	basic_model	HOXC11
log_likelihoods	protein_coding_genes	0.33728626570749	basic_model	ATPIF1
log_likelihoods	protein_coding_genes	0.33733176513537	basic_model	HSPB11
log_likelihoods	protein_coding_genes	0.337361575900351	basic_model	GOLT1A
log_likelihoods	protein_coding_genes	0.337441891591184	basic_model	FADS3
log_likelihoods	protein_coding_genes	0.337496789884775	basic_model	KRTAP21-1
log_likelihoods	protein_coding_genes	0.337622924173441	basic_model	SMIM8
log_likelihoods	protein_coding_genes	0.337644357112323	basic_model	RERG
log_likelihoods	protein_coding_genes	0.338112730492772	basic_model	OR10G9
log_likelihoods	protein_coding_genes	0.338124033778737	basic_model	SAMD9
log_likelihoods	protein_coding_genes	0.338176110883976	basic_model	CADM3
log_likelihoods	protein_coding_genes	0.338705230300034	basic_model	DEFB116
log_likelihoods	protein_coding_genes	0.338766951066729	basic_model	HORMAD2
log_likelihoods	protein_coding_genes	0.338940731176973	basic_model	EPPIN-WFDC6
log_likelihoods	protein_coding_genes	0.338943774701168	basic_model	PRSS21
log_likelihoods	protein_coding_genes	0.338964953787907	basic_model	DPPA3
log_likelihoods	protein_coding_genes	0.339342927322338	basic_model	SLC22A11
log_likelihoods	protein_coding_genes	0.339419840862565	basic_model	CDH5
log_likelihoods	protein_coding_genes	0.339560474497514	basic_model	OR4K15
log_likelihoods	protein_coding_genes	0.339630672867274	basic_model	S100A1
log_likelihoods	protein_coding_genes	0.339749874428404	basic_model	MATK
log_likelihoods	protein_coding_genes	0.33975819243327	basic_model	GFAP
log_likelihoods	protein_coding_genes	0.339788112606464	basic_model	LPL
log_likelihoods	protein_coding_genes	0.339886706402609	basic_model	RGS17
log_likelihoods	protein_coding_genes	0.33990308037279	basic_model	FPR1
log_likelihoods	protein_coding_genes	0.339968763713304	basic_model	C7orf66
log_likelihoods	protein_coding_genes	0.3401631885745	basic_model	DLGAP5
log_likelihoods	protein_coding_genes	0.34030679503479	basic_model	OR9A2
log_likelihoods	protein_coding_genes	0.340873400424316	basic_model	TMEM105
log_likelihoods	protein_coding_genes	0.341010343310996	basic_model	NUDT13
log_likelihoods	protein_coding_genes	0.341152839600632	basic_model	TAAR8
log_likelihoods	protein_coding_genes	0.341202772730512	basic_model	POLR2H
log_likelihoods	protein_coding_genes	0.341480618676451	basic_model	MRPL10
log_likelihoods	protein_coding_genes	0.341522131877312	basic_model	COX7C
log_likelihoods	protein_coding_genes	0.341555022897518	basic_model	KRT7
log_likelihoods	protein_coding_genes	0.341599894120836	basic_model	EP400NL
log_likelihoods	protein_coding_genes	0.341772036988858	basic_model	SERPINB9
log_likelihoods	protein_coding_genes	0.341937416093975	basic_model	AC004824.2
log_likelihoods	protein_coding_genes	0.34217805675733	basic_model	TMEM170B
log_likelihoods	protein_coding_genes	0.342180852833853	basic_model	TAS1R1
log_likelihoods	protein_coding_genes	0.342212100633745	basic_model	OR8J1
log_likelihoods	protein_coding_genes	0.342239256565142	basic_model	CISD2
log_likelihoods	protein_coding_genes	0.342358939158391	basic_model	HAUS2
log_likelihoods	protein_coding_genes	0.34321015522043	basic_model	GAPT
log_likelihoods	protein_coding_genes	0.343285172588466	basic_model	RFX1
log_likelihoods	protein_coding_genes	0.3434062273439	basic_model	MYL1
log_likelihoods	protein_coding_genes	0.343679080235593	basic_model	FILIP1
log_likelihoods	protein_coding_genes	0.343824810516715	basic_model	OR1B1
log_likelihoods	protein_coding_genes	0.343983590161446	basic_model	DKK4
log_likelihoods	protein_coding_genes	0.344047693501997	basic_model	ATP6V0A4
log_likelihoods	protein_coding_genes	0.344268294162943	basic_model	ARL14EPL
log_likelihoods	protein_coding_genes	0.344665609433026	basic_model	C2
log_likelihoods	protein_coding_genes	0.345017514246176	basic_model	PHF5A
log_likelihoods	protein_coding_genes	0.345060941763097	basic_model	PDE7B
log_likelihoods	protein_coding_genes	0.345510047499022	basic_model	FABP2
log_likelihoods	protein_coding_genes	0.345866266553591	basic_model	C12orf57
log_likelihoods	protein_coding_genes	0.34607320392933	basic_model	PPIC
log_likelihoods	protein_coding_genes	0.346248016115744	basic_model	SLC17A3
log_likelihoods	protein_coding_genes	0.346418072590037	basic_model	ZNF286B
log_likelihoods	protein_coding_genes	0.346428216776605	basic_model	AL590714.1
log_likelihoods	protein_coding_genes	0.346606054549136	basic_model	GLRB
log_likelihoods	protein_coding_genes	0.346607273528598	basic_model	ABT1
log_likelihoods	protein_coding_genes	0.346747247723491	basic_model	ITPRIPL2
log_likelihoods	protein_coding_genes	0.346792207359982	basic_model	TMPRSS11A
log_likelihoods	protein_coding_genes	0.346794196517641	basic_model	DUS4L
log_likelihoods	protein_coding_genes	0.34685817844919	basic_model	LIMS2
log_likelihoods	protein_coding_genes	0.347281210431665	basic_model	GJB7
log_likelihoods	protein_coding_genes	0.34755857561685	basic_model	CCDC27
log_likelihoods	protein_coding_genes	0.347599589628079	basic_model	C3orf56
log_likelihoods	protein_coding_genes	0.347699076250983	basic_model	AMT
log_likelihoods	protein_coding_genes	0.347932896445993	basic_model	TMPRSS11BNL
log_likelihoods	protein_coding_genes	0.348176561742759	basic_model	AGR2
log_likelihoods	protein_coding_genes	0.348243470557302	basic_model	HIST1H2BG
log_likelihoods	protein_coding_genes	0.348302472022696	basic_model	RIT1
log_likelihoods	protein_coding_genes	0.348700192000831	basic_model	TWSG1
log_likelihoods	protein_coding_genes	0.348784287602113	basic_model	LDHC
log_likelihoods	protein_coding_genes	0.348799250204302	basic_model	SCG2
log_likelihoods	protein_coding_genes	0.348844748882739	basic_model	SVOPL
log_likelihoods	protein_coding_genes	0.348862142539915	basic_model	AP001421.1
log_likelihoods	protein_coding_genes	0.34906899159466	basic_model	CD36
log_likelihoods	protein_coding_genes	0.349212913842014	basic_model	BAP1
log_likelihoods	protein_coding_genes	0.349246487223844	basic_model	BMP2
log_likelihoods	protein_coding_genes	0.349376887904193	basic_model	RAB3D
log_likelihoods	protein_coding_genes	0.349515887084313	basic_model	MFAP5
log_likelihoods	protein_coding_genes	0.349755587184979	basic_model	SYT7
log_likelihoods	protein_coding_genes	0.349981762199648	basic_model	TSTD2
log_likelihoods	protein_coding_genes	0.350184361474789	basic_model	CDCA8
log_likelihoods	protein_coding_genes	0.35036490524938	basic_model	HIF3A
log_likelihoods	protein_coding_genes	0.350586563972306	basic_model	ASTL
log_likelihoods	protein_coding_genes	0.350720768979166	basic_model	HLA-A
log_likelihoods	protein_coding_genes	0.350766424174629	basic_model	PIK3CG
log_likelihoods	protein_coding_genes	0.350896974622049	basic_model	B4GALT1
log_likelihoods	protein_coding_genes	0.351271652692523	basic_model	ZNF488
log_likelihoods	protein_coding_genes	0.35142861482327	basic_model	DRD3
log_likelihoods	protein_coding_genes	0.351517613572423	basic_model	CTD-2547L24.3
log_likelihoods	protein_coding_genes	0.351736328509594	basic_model	RP11-15E18.4
log_likelihoods	protein_coding_genes	0.352027553809448	basic_model	IQCJ
log_likelihoods	protein_coding_genes	0.352042053682591	basic_model	PHF7
log_likelihoods	protein_coding_genes	0.352097683622833	basic_model	MEIG1
log_likelihoods	protein_coding_genes	0.352245328350016	basic_model	RP11-181C3.1
log_likelihoods	protein_coding_genes	0.352774631414354	basic_model	SPATA20
log_likelihoods	protein_coding_genes	0.352841958889414	basic_model	BSND
log_likelihoods	protein_coding_genes	0.353027869200389	basic_model	REG1B
log_likelihoods	protein_coding_genes	0.353544481802776	basic_model	RALYL
log_likelihoods	protein_coding_genes	0.353579142138566	basic_model	RSG1
log_likelihoods	protein_coding_genes	0.353594831596791	basic_model	FLJ00273
log_likelihoods	protein_coding_genes	0.353619963085664	basic_model	C21orf67
log_likelihoods	protein_coding_genes	0.353839259714692	basic_model	BPGM
log_likelihoods	protein_coding_genes	0.354083386644056	basic_model	CD53
log_likelihoods	protein_coding_genes	0.354168263858246	basic_model	AL359736.1
log_likelihoods	protein_coding_genes	0.354433560145945	basic_model	C10orf53
log_likelihoods	protein_coding_genes	0.35445341219764	basic_model	RP11-1220K2.2
log_likelihoods	protein_coding_genes	0.354701655798284	basic_model	MR1
log_likelihoods	protein_coding_genes	0.354858635287575	basic_model	OR5D16
log_likelihoods	protein_coding_genes	0.355029436073911	basic_model	CSTL1
log_likelihoods	protein_coding_genes	0.355271913474025	basic_model	AP000679.2
log_likelihoods	protein_coding_genes	0.355368463032037	basic_model	OR6J1
log_likelihoods	protein_coding_genes	0.355776105308461	basic_model	CD300E
log_likelihoods	protein_coding_genes	0.355799204348381	basic_model	LAMA1
log_likelihoods	protein_coding_genes	0.355905585389446	basic_model	C3orf30
log_likelihoods	protein_coding_genes	0.356105236952886	basic_model	AVPI1
log_likelihoods	protein_coding_genes	0.356276176705074	basic_model	ME3
log_likelihoods	protein_coding_genes	0.356414294933873	basic_model	REEP1
log_likelihoods	protein_coding_genes	0.356689534944207	basic_model	HMGN2
log_likelihoods	protein_coding_genes	0.356761195984262	basic_model	TES
log_likelihoods	protein_coding_genes	0.356890256592784	basic_model	TMEM216
log_likelihoods	protein_coding_genes	0.356936008416644	basic_model	PLCXD3
log_likelihoods	protein_coding_genes	0.356959392047053	basic_model	EFEMP2
log_likelihoods	protein_coding_genes	0.357217371348269	basic_model	EQTN
log_likelihoods	protein_coding_genes	0.357264057791394	basic_model	NMU
log_likelihoods	protein_coding_genes	0.357294310776053	basic_model	FAM26E
log_likelihoods	protein_coding_genes	0.357324881038023	basic_model	LINGO2
log_likelihoods	protein_coding_genes	0.357486402465984	basic_model	UBE2V1
log_likelihoods	protein_coding_genes	0.357489058746672	basic_model	NPAP1
log_likelihoods	protein_coding_genes	0.357501317162546	basic_model	KCTD11
log_likelihoods	protein_coding_genes	0.35784725032158	basic_model	C11orf16
log_likelihoods	protein_coding_genes	0.35813388495726	basic_model	ZBTB8OS
log_likelihoods	protein_coding_genes	0.358313697167111	basic_model	AMICA1
log_likelihoods	protein_coding_genes	0.358553716243608	basic_model	SPINK8
log_likelihoods	protein_coding_genes	0.358754559605979	basic_model	MRPS10
log_likelihoods	protein_coding_genes	0.359235394030946	basic_model	AC132872.2
log_likelihoods	protein_coding_genes	0.359393578587265	basic_model	BTN2A1
log_likelihoods	protein_coding_genes	0.359446110063802	basic_model	ACTL6B
log_likelihoods	protein_coding_genes	0.359643025359501	basic_model	C5orf56
log_likelihoods	protein_coding_genes	0.359689822624281	basic_model	GRAMD2
log_likelihoods	protein_coding_genes	0.359719916076603	basic_model	WAC
log_likelihoods	protein_coding_genes	0.359932261491742	basic_model	SLC22A24
log_likelihoods	protein_coding_genes	0.359949517924975	basic_model	OR9G4
log_likelihoods	protein_coding_genes	0.35998619908371	basic_model	MANF
log_likelihoods	protein_coding_genes	0.360056672980612	basic_model	AP003774.4
log_likelihoods	protein_coding_genes	0.360078298376922	basic_model	OR1D2
log_likelihoods	protein_coding_genes	0.36017900226221	basic_model	AC112715.2
log_likelihoods	protein_coding_genes	0.360500030953513	basic_model	SYT14
log_likelihoods	protein_coding_genes	0.360555544272802	basic_model	ATF5
log_likelihoods	protein_coding_genes	0.360594599391467	basic_model	C1orf134
log_likelihoods	protein_coding_genes	0.360682381746278	basic_model	RP11-211G3.3
log_likelihoods	protein_coding_genes	0.360850037059847	basic_model	NPB
log_likelihoods	protein_coding_genes	0.361043002368167	basic_model	IL22RA2
log_likelihoods	protein_coding_genes	0.361080357322035	basic_model	PMP2
log_likelihoods	protein_coding_genes	0.361313555529656	basic_model	GPR85
log_likelihoods	protein_coding_genes	0.361607032923262	basic_model	VARS
log_likelihoods	protein_coding_genes	0.361967052324786	basic_model	MT1H
log_likelihoods	protein_coding_genes	0.362101639133899	basic_model	OR4K2
log_likelihoods	protein_coding_genes	0.362154962596005	basic_model	CATSPER2
log_likelihoods	protein_coding_genes	0.362308187548937	basic_model	AC074389.6
log_likelihoods	protein_coding_genes	0.362541933478905	basic_model	C17orf98
log_likelihoods	protein_coding_genes	0.362643609105856	basic_model	ZC3HAV1L
log_likelihoods	protein_coding_genes	0.362888088417902	basic_model	RGS7
log_likelihoods	protein_coding_genes	0.362967331929367	basic_model	GINS2
log_likelihoods	protein_coding_genes	0.3632872663081	basic_model	ZNF331
log_likelihoods	protein_coding_genes	0.36334121078751	basic_model	PIEZO2
log_likelihoods	protein_coding_genes	0.36335783847433	basic_model	SH3GL2
log_likelihoods	protein_coding_genes	0.363370761673271	basic_model	POT1
log_likelihoods	protein_coding_genes	0.363615800107924	basic_model	AC073657.1
[truncated: 152,043 more rows]
