# Supplementary material for: Non-coding cancer driver candidates identified with a sample- and position-specific model of the somatic mutation rate
Source: eLife journal article supplement (doi:10.7554/elife.21778), 2017-03-31
Supplement: supp [file elife-21778-supp-v2.zip › elife_poa_e21778_Figure_4_figure_supplement_2_source_data_1.txt]

region_length	n_mutations	in_cosmic	p
1908	10	0	0.655095720405365
4653	16	0	0.640350655115007
2493	4	0	0.964538470870504
444	0	0	0.999999999999942
474	2	0	0.57265550149592
222	2	0	0.106203307662634
381	2	0	0.361828889739478
1299	3	0	0.900236584612051
1620	2	0	0.979137510582809
267	2	0	0.21621808720077
2277	8	0	0.368889773841469
1134	4	0	0.339159063312875
1131	3	0	0.519091122541531
2834	19	0	0.0968829699209191
2475	6	0	0.995853835170077
3681	13	0	0.97873428137285
2429	14	0	0.985340352932726
2121	5	0	0.827782273409233
231	3	0	0.00850433025674195
1103	1	0	0.936851238013655
813	1	0	0.998215137654732
1398	2	0	0.999395933574643
1434	2	0	0.999947232832884
2616	8	0	0.827773561686367
2548	0	0	1
1992	0	0	1
2061	0	0	1
2061	2	0	0.998729629051324
1992	4	0	0.998184758178305
2061	2	0	0.985699195066203
2438	0	0	0.999999999999799
1122	7	0	0.0865948045013927
1104	3	0	0.884736008475772
1023	3	0	0.910293199443891
987	5	0	0.460848961566874
972	3	0	0.94012978990651
413	3	0	0.438284468452492
967	5	0	0.438932808357967
1128	7	0	0.374361608164967
78	0	0	0.999999999999987
303	0	0	0.999999999999995
60	0	0	0.999999999999986
372	2	0	0.356493476478044
360	0	0	1
207	0	0	0.999999999999992
642	2	0	0.901492466007284
843	7	0	0.350138320725679
432	0	0	1
105	1	0	0.536698804504651
378	0	0	1
477	3	0	0.644455417084674
486	0	0	0.999999999999958
486	2	0	0.503231714214834
2388	3	0	0.99414732367568
2025	9	0	0.951884526301081
333	0	0	0.999999999999965
13703	67	0	0.967802497730145
1086	2	0	0.715647617232918
960	5	0	0.485065438484991
576	1	0	0.809050403974945
5586	18	0	0.850882402904556
1083	4	0	0.676209734510242
4383	43	0	0.366968091691775
1918	12	0	0.229085244904027
1518	4	0	0.888025598573139
1401	5	0	0.29151143785641
1098	0	0	0.999999999999876
1098	1	0	0.913036529365654
1098	0	0	0.999999999999948
1257	3	0	0.660650173017364
2067	11	0	0.506559900147885
2541	14	0	0.194928889062736
1576	5	0	0.704068738477886
1525	5	0	0.660558310274464
6020	14	0	0.961511715819007
2788	23	0	0.14393811693407
3571	10	0	0.738504793170156
549	2	0	0.395331164876072
540	0	0	1
2641	12	0	0.665646897074613
3387	33	0	0.000509007236313275
324	2	0	0.3147360162018
1128	4	0	0.398504395838738
569	1	0	0.92388712275917
1869	3	0	0.976765551466191
2379	6	0	0.908550356112805
837	5	0	0.571125477584632
1386	2	0	0.573689446386564
1119	0	0	0.999999999999967
1771	7	0	0.595548126037832
459	0	0	1
905	3	0	0.536228855695242
4140	19	0	0.87186502776064
444	3	0	0.112573136385187
1728	1	0	0.98440810557158
783	3	0	0.532030233166063
436	2	0	0.124090827529627
1169	4	0	0.192103781202338
1610	6	0	0.763420705969301
3035	13	0	0.384876968821749
1457	2	0	0.995420668327159
429	1	0	0.596085060691194
981	1	0	0.891705767512887
3849	15	0	0.980996234063519
589	1	0	0.912060587580785
5550	15	0	0.628287864100154
1524	5	0	0.759590713615391
1818	6	0	0.586386788907654
1008	2	0	0.855729746835471
402	1	0	0.704313388814106
627	1	0	0.923312485701434
639	2	0	0.774750146446701
468	3	0	0.199551053500763
4569	37	0	0.563974848565528
503	2	0	0.37828741093587
285	3	0	0.193153282158075
2701	6	0	0.885597585025151
600	2	0	0.881533703437812
1008	4	0	0.733671593462486
519	2	0	0.749540560471844
574	2	0	0.833948805824601
1443	8	0	0.360244105411683
3744	11	0	0.956486764968246
531	7	0	0.025525668584086
3717	8	0	0.907125151425123
369	2	0	0.373070155891581
2070	1	0	0.99848781987655
321	0	0	0.999999999999985
366	1	0	0.822223821326568
387	2	0	0.516501541065141
604	3	0	0.53178677750237
936	3	0	0.491947048061796
456	0	0	0.999999999999997
672	2	0	0.571003995935271
558	0	0	1
2231	8	0	0.822292903998563
4394	28	0	0.930280911628864
2253	5	0	0.701376852326349
709	1	0	0.968498784058834
387	2	0	0.672062820233869
1338	4	0	0.792857286488103
2526	9	0	0.919146126230043
438	1	0	0.885077893616309
774	1	0	0.993925642299529
246	2	0	0.36491938812119
768	2	0	0.943505315065864
2269	16	0	0.461743142887293
1136	4	0	0.650887067028703
1041	5	0	0.65435541248205
1074	3	0	0.572478645005765
1035	3	0	0.824882936865465
450	2	0	0.85039363714927
441	9	0	0.00770019790001799
900	2	0	0.958381603855552
1193	9	0	0.173354206388561
1767	5	0	0.650498681253551
411	1	0	0.719239459093208
1120	4	0	0.587761445675414
1479	5	0	0.932014289363651
3453	5	0	0.966808895426273
2667	12	0	0.657012064535745
777	0	0	0.999999999999914
813	6	0	0.252840325269257
1461	4	0	0.88293439325071
1152	2	0	0.966414009794783
1026	4	0	0.718134407675182
3319	7	0	0.996267395245264
1011	3	0	0.368477050600539
10445	51	0	0.152121365068454
2778	16	0	0.791508586807288
898	3	0	0.342056188987965
258	1	0	0.468571278651361
1673	1	0	0.999671709033988
1395	5	0	0.399974874718908
819	2	0	0.866946163860135
2302	9	0	0.846143807652115
408	1	0	0.629977480129374
1860	7	0	0.887012482529369
1440	11	0	0.124565109620031
2238	5	0	0.73333639760314
327	1	0	0.409013620191334
681	2	0	0.895454980706988
2919	7	0	0.999957326650941
2666	11	0	0.598800788017429
2194	17	0	0.19494358584621
4526	18	0	0.36667362356222
1410	1	0	0.978639716385442
588	0	0	0.999999999999981
789	2	0	0.901655036675557
1299	4	0	0.154196447776522
2124	5	0	0.97486163333066
1377	5	0	0.610874298351479
2271	9	0	0.985571840597364
1487	3	0	0.784047893951535
2105	10	0	0.276065439585534
1651	6	0	0.639002670653617
1851	2	0	0.997990957170919
3278	9	0	0.958042294399507
2772	17	0	0.933831799483542
10896	50	0	0.999299671360437
864	6	0	0.0322170576601373
2295	5	0	0.838912069781392
822	3	0	0.200205393531401
1824	14	0	0.096089988232773
1617	2	0	0.890243316761455
747	4	0	0.597425765400443
1527	4	0	0.906838154492873
1494	5	0	0.955490945524474
1569	4	0	0.999399889998158
1473	15	0	0.0774756145745811
1473	18	0	0.0383282672722937
1604	14	0	0.267000780158936
1473	11	0	0.369154816485322
1482	14	0	0.0389235929791976
3123	3	0	0.994626074345121
2228	13	0	0.0346425929379778
699	1	0	0.803901961857439
2352	6	0	0.537787724416282
2214	5	0	0.791570305491078
2760	10	0	0.213898289904427
2232	5	0	0.598388478182873
4863	20	0	0.983988967114378
552	1	0	0.884998029711869
801	5	0	0.515957021532209
5760	13	0	0.993111766180441
7629	40	0	0.494439280161345
3446	5	0	0.980757862608782
1260	0	0	1
714	4	0	0.463156657401826
1665	5	0	0.906844528635764
783	4	0	0.211831428774082
4806	18	0	0.18478656718736
1530	5	0	0.979262268902375
5598	19	0	0.987913649921671
1362	4	0	0.782408916362671
1719	8	0	0.811643834286322
841	6	0	0.475906284822328
663	1	0	0.932271828769376
1879	8	0	0.685941375113155
1155	2	0	0.896779197443214
585	2	0	0.804851117077309
576	4	0	0.289476163345317
1791	14	0	0.754887232869176
1101	5	0	0.682807034031341
2034	4	0	0.758388418887854
912	3	0	0.692424296771277
873	3	0	0.510077636290455
1431	9	0	0.654507832802267
4149	6	0	0.992325463399821
363	0	0	0.999999999999988
465	0	0	1
813	1	0	0.806717815895613
759	2	0	0.984785249431381
775	2	0	0.525192986232206
1961	7	0	0.84981401909345
1622	5	0	0.668175919712078
1815	2	0	0.745364954454202
2514	6	0	0.71246103146228
3186	9	0	0.527429506334834
4482	20	0	0.0825469166554618
1047	6	0	0.0593578460616227
2568	7	0	0.725901764418485
588	0	0	1
921	5	0	0.232420767558924
1954	15	0	0.112238688202309
1749	4	0	0.817780595313333
2335	5	0	0.742999782358214
852	5	0	0.87472494907896
2673	18	0	0.466080956816497
1248	3	0	0.685700142962177
3884	10	0	0.63583771045927
1338	4	0	0.870996554728701
1440	5	0	0.945174286302203
702	1	0	0.880156763646438
7293	11	0	0.990397781029167
690	1	0	0.857286866575644
4053	2	0	0.999910309415925
3762	2	0	0.999999988848424
3963	8	0	0.990094720204492
927	0	0	0.999999999999931
318	2	0	0.612832753130813
285	0	0	0.999999999999996
270	0	0	1
270	0	0	0.999999999999988
270	1	0	0.659940312537716
528	0	0	0.999999999999887
270	0	0	0.999999999999986
2715	7	0	0.435053162353797
1074	3	0	0.410843479183851
1281	5	0	0.494138460632515
1203	3	0	0.895825708887524
903	1	0	0.986583510315017
3337	10	0	0.440683341810602
1239	3	0	0.877927352026589
1149	3	0	0.942885713831432
735	1	0	0.945577214176927
777	1	0	0.983814437603459
957	7	0	0.959815937369447
1117	2	0	0.761529246976156
840	1	0	0.983156301451321
702	0	0	1
840	23	0	1.74948594770848e-06
3692	8	0	0.999893694062214
3949	25	0	0.183496901715212
472	1	0	0.904304498164028
1576	0	0	0.999999999999713
270	0	0	0.99999999999998
2085	2	0	0.999999798519444
1766	7	0	0.986785124440402
5580	14	0	0.676307459495209
1437	10	0	0.629358283304711
1290	11	0	0.332646164827083
1395	5	0	0.320292027934065
1468	6	0	0.9489683333624
1038	4	0	0.610824167299065
1113	5	0	0.975523197273991
1008	4	0	0.563255815033768
1723	3	0	0.810537362582583
504	0	0	0.999999999999979
771	5	0	0.0514369430297923
1297	8	0	0.239500576519589
2499	7	0	0.930243568332295
3843	20	0	0.998501026127917
3648	41	0	0.00227588828880671
1014	10	0	0.747244034879342
1377	11	0	0.0621402555640726
3030	19	0	0.918912308425434
1773	7	0	0.528633451881034
726	2	0	0.725209958762259
765	2	0	0.613221641184116
1905	1	0	0.998302298285662
1119	2	0	0.825788631888826
1755	5	0	0.956557363058084
2367	5	0	0.854132124624519
2685	7	0	0.899879279171396
3337	5	0	0.906303701782327
813	2	0	0.872525221028069
1050	4	0	0.359254287751571
3009	12	0	0.290573273138835
2803	10	0	0.72207536897481
822	6	0	0.880404038725022
1074	2	0	0.999873852042114
1248	2	0	0.902971343529159
1041	3	0	0.365600500472862
984	3	0	0.701623306741429
2141	7	0	0.880662561866085
2328	6	0	0.781133861731428
1813	13	0	0.894509718477663
2028	13	0	0.343958123954111
1741	4	0	0.767484987977823
1542	15	0	0.281682113897865
1443	7	0	0.389928969598629
1089	2	0	0.973709865515945
3060	5	0	0.935549426055333
855	1	0	0.755355265258732
684	3	0	0.261022863581536
1425	6	0	0.399502199428805
1437	5	0	0.25574425258505
1419	5	0	0.373901581612422
1478	1	0	0.964607030623541
1449	5	0	0.257918007799782
1260	5	0	0.520089376937568
871	1	0	0.966667137112868
819	4	0	0.435959165730684
1500	5	0	0.868196526994827
1314	4	0	0.817673245353349
3515	7	0	0.847844343932031
1251	5	0	0.380598620354499
3192	16	0	0.974683937083755
2588	6	0	0.733988630858158
2841	20	0	0.360774324113363
3048	13	0	0.789523553989298
1644	5	0	0.857969755745955
2535	18	0	0.799577835740623
7623	22	0	0.97345185553649
915	1	0	0.952402895942357
967	1	0	0.97885260493372
1155	11	0	0.129733870550069
4432	20	0	0.952463882804983
5964	26	0	0.575460359336835
1866	7	0	0.317610426980564
4080	18	0	0.577796652900765
3171	7	0	0.788003348978626
5734	20	0	0.639011035835356
1254	1	0	0.975671978106851
537	1	0	0.757293502792803
5298	27	0	0.963264138979913
2217	15	0	0.0779759361273969
846	6	0	0.676628824722268
1309	3	0	0.870719844659074
1236	3	0	0.706363833235818
2508	9	0	0.512243460871168
1674	5	0	0.8139484909959
828	1	0	0.958666116183494
378	1	0	0.768020717382172
1261	1	0	0.929656956283131
1227	7	0	0.173216335725358
1101	0	0	0.999999999999923
1200	4	0	0.588764000155921
1299	3	0	0.679279344430039
1197	7	0	0.178286319056068
2271	9	0	0.8856515307311
1872	13	0	0.843850008596412
1683	7	0	0.951107257764984
790	11	0	0.0116064703577405
555	5	0	0.0483009316734202
1863	10	0	0.2119835092286
1746	9	0	0.970360824827287
585	0	0	1
585	4	0	0.431588943235003
2010	3	0	0.922048684846424
1467	3	0	0.742459515510408
1330	8	0	0.138207646882812
837	1	0	0.928876571267768
1722	7	0	0.853287331996788
522	0	0	1
2640	2	0	0.999390025011005
1188	10	0	0.22635945441402
747	3	0	0.889428438774907
2655	8	0	0.780715582025987
1929	6	0	0.452525822077909
1157	7	0	0.036846252625139
267	2	0	0.175355619554778
876	3	0	0.578016018420739
2908	8	0	0.561563864149434
717	2	0	0.97141836061729
1559	6	0	0.246400072297062
1498	0	0	1
9771	38	0	0.947206238558796
1059	3	0	0.952735246666836
1710	4	0	0.986113639999587
2850	4	0	0.990928797038839
3099	5	0	0.926357517665228
756	0	0	1
1824	12	0	0.108374844136819
4461	1	0	0.999998147912155
4371	1	0	0.999999885684967
939	1	0	0.891264219158304
538	2	0	0.418738638449194
345	0	0	0.999999999999994
549	3	0	0.502418811176613
1383	3	0	0.776742303428409
1005	2	0	0.824899336957006
2296	5	0	0.943519630713973
75	0	0	1
75	2	0	0.0588965813880413
961	1	0	0.962208851210966
4971	34	0	0.875437957434759
6323	11	0	0.994216089434285
900	4	0	0.34120038902544
4105	22	0	0.259656187810951
363	0	0	1
879	1	0	0.994350133052427
2652	7	0	0.728927846058208
612	3	0	0.198413802817282
3476	18	0	0.228284969124724
1884	5	0	0.903985827344273
1759	3	0	0.990288591840555
645	1	0	0.988734558319856
2181	3	0	0.971316919920672
999	1	0	0.999852025664773
1095	4	0	0.977653311459022
834	1	0	0.999745216732652
1568	1	0	0.999396162054811
2430	8	0	0.60734740424667
1044	6	0	0.360892372638637
2133	11	0	0.1148253315
1293	4	0	0.924437859044019
537	0	0	1
270	1	0	0.509478326545799
1128	4	0	0.617872498346386
5217	19	0	0.995932525708359
919	3	0	0.642038764625959
2476	20	0	0.740585304672178
3381	12	0	0.632703434890536
1273	2	0	0.943275977479521
1410	2	0	0.945829573837962
1059	5	0	0.134954033325174
761	0	0	1
2460	0	0	0.99999999999985
2763	3	0	0.999999489195443
1320	5	0	0.42834388692272
1107	6	0	0.085691473920927
3033	18	0	0.393656585389604
1638	4	0	0.834003479008802
957	7	0	0.144699356804953
435	2	0	0.619955721114441
1470	5	0	0.760291051563123
1734	3	0	0.910479318434459
987	1	0	0.998372616430417
1446	2	0	0.992797493203927
1680	4	0	0.603874994351431
2571	10	0	0.859205128036034
1919	2	0	0.996388093127061
1619	5	0	0.933586099461409
1899	3	0	0.869907533058153
4110	8	0	0.999732558901385
1476	8	0	0.226975182062467
1337	3	0	0.977239538248397
956	2	0	0.619373734515686
315	0	0	1
7542	71	0	0.767729166101004
809	3	0	0.490450240033361
1053	0	0	1
5616	17	0	0.421256400315613
1420	6	0	0.0695008223734724
2577	8	0	0.823258051581183
990	5	0	0.29952448410964
1252	5	0	0.340271484352185
1558	8	0	0.178545601644129
3465	11	0	0.969643914773764
1817	7	0	0.640056682901457
2443	14	0	0.325584873801939
765	2	0	0.534052386537786
3186	9	0	0.527429506334834
1203	10	0	0.143069533943482
1045	3	0	0.783596421904305
1785	2	0	0.963758784634547
1350	2	0	0.819720624036938
2590	12	0	0.795207757705008
1263	2	0	0.938820049765801
3145	21	0	0.0464096198668203
909	3	0	0.89886935712922
2418	12	0	0.346966480307967
588	5	0	0.164902025223047
385	1	0	0.81226661139737
1330	6	0	0.156626061097487
7191	29	0	0.925487092948357
1320	7	0	0.0780029028312277
1648	7	0	0.527702235531067
1590	18	0	0.0270881742879513
1432	7	0	0.891311354489382
1407	2	0	0.998476413899644
1404	12	0	0.241485352826967
1398	9	0	0.698604972290467
1812	4	0	0.860093216860738
4173	15	0	0.331022151357132
896	6	0	0.0197019071630634
928	6	0	0.68831132613594
624	1	0	0.824375829282568
954	4	0	0.293431004140985
408	2	0	0.626850651401175
1757	4	0	0.715808846284265
4995	17	0	0.316681577265511
459	3	0	0.442684603951276
771	1	0	0.85838047909054
2121	7	0	0.920181862554401
2371	10	0	0.664659331467816
1113	2	0	0.999497989710588
1308	3	0	0.922696559078868
1029	5	0	0.496398667943605
1043	2	0	0.945876423713563
861	0	0	0.999999999999887
1581	6	0	0.320395086024408
3075	10	0	0.818872857138931
1134	4	0	0.899172094008992
2304	14	0	0.683809359408078
1050	4	0	0.577151723439211
987	5	0	0.949886505278809
1087	4	0	0.763832565526988
1281	0	0	1
1281	0	0	0.999999999999951
2138	5	0	0.985958081910582
1787	5	0	0.929027544864229
1746	6	0	0.864583897537117
2373	7	0	0.782235709546561
1599	6	0	0.793331530782565
621	5	0	0.0489722700521074
1470	4	0	0.931905328832045
1069	6	0	0.250862598742513
1206	4	0	0.589446902849602
3684	11	0	0.904196110448133
3744	22	0	0.893256672439566
657	4	0	0.556100563180243
768	4	0	0.262153901536237
931	4	0	0.949437935482357
578	3	0	0.299944895276089
2091	4	0	0.936924588074909
1101	8	0	0.0280713794820165
1020	6	0	0.413612876248447
275	1	0	0.59426791415681
384	1	0	0.781635681818236
1326	6	0	0.645208513107784
687	5	0	0.0616166804126114
522	3	0	0.545678424318406
980	2	0	0.758143086409225
852	4	0	0.398998115848269
888	2	0	0.499020944595937
3894	10	0	0.804083521544521
834	2	0	0.948028083094553
1963	7	0	0.438658655472293
2154	2	0	0.98506581762362
1475	6	0	0.387934791986862
615	2	0	0.543867544126853
1080	3	0	0.394456858386984
3003	10	0	0.414295108471478
3354	7	0	0.77831887742743
3588	7	0	0.894458644259118
1564	2	0	0.662435522639327
2936	5	0	0.822910774728223
1190	6	0	0.202229958941084
2768	17	0	0.339402380185914
937	3	0	0.366845720564876
954	1	0	0.981959951491718
794	7	0	0.0381283978339991
747	4	0	0.384672068847175
1128	5	0	0.830806145393914
969	6	0	0.0567788947771819
978	3	0	0.392244078241805
1014	3	0	0.472591480588192
1461	4	0	0.838694226029984
1707	3	0	0.966624242040336
1339	2	0	0.999494641035161
3720	6	0	0.981149987263999
1749	4	0	0.659155456641383
2277	5	0	0.909839222764288
2727	5	0	0.994991947712755
1551	7	0	0.292241283718654
1530	5	0	0.723517743545968
1545	5	0	0.977824092069161
1599	8	0	0.815328418878988
999	1	0	0.897857830564759
1095	3	0	0.797953283690322
1428	7	0	0.36913683257223
1098	4	0	0.741981172935993
2076	13	0	0.127970798366132
4750	17	0	0.987048400062507
3708	13	0	0.696172457245601
3654	6	0	0.90632283779208
717	1	0	0.858209683755239
436	0	0	0.999999999999941
5547	19	0	0.7589445810431
3733	30	0	0.0710625330139899
3671	30	0	0.964016370062715
1804	12	0	0.26265796729858
1329	4	0	0.640247688710196
456	0	0	0.999999999999915
477	0	0	1
1197	5	0	0.670155320095247
1443	3	0	0.691343909243668
1623	2	0	0.909876958427808
1500	1	0	0.998741960285509
2970	14	0	0.138433830377388
2361	7	0	0.564549915949755
1233	6	0	0.221335053295301
6738	24	0	0.901770238037331
1095	5	0	0.728204654256204
3034	11	0	0.747045865649431
1680	5	0	0.878622161594012
9098	33	0	0.685389554286712
1197	3	0	0.825988571080454
2790	13	0	0.540791383252059
2403	15	0	0.00914180627543326
1091	12	0	0.061076975843608
2328	3	0	0.999342819678071
1761	16	0	0.843124118462546
2007	5	0	0.799719205937684
3575	14	0	0.673090133829147
990	3	0	0.955534444035438
561	0	0	0.999999999999966
741	2	0	0.749459789914899
2232	3	0	0.919248555271749
1181	4	0	0.280742616434671
454	0	0	0.999999999999956
630	1	0	0.953569205143741
3048	10	0	0.998448137758779
369	1	0	0.676877252464108
1770	1	0	0.995817080710299
1641	2	0	0.963059085134866
1056	0	0	1
1056	1	0	0.958074521326192
433	0	0	1
1174	7	0	0.308811033548877
474	3	0	0.743111773546928
3501	5	0	0.975490622599765
1235	4	0	0.725566337415712
1656	5	0	0.697694073994995
1050	3	0	0.649112877200176
813	5	0	0.301224955661189
885	3	0	0.67567747706739
3370	10	0	0.690914765584611
8482	30	0	0.999999998086012
1341	7	0	0.705927872266078
1335	13	0	0.683127121619612
2793	14	0	0.21970458123134
1701	2	0	0.995011800557064
444	1	0	0.652298636108978
684	1	0	0.794286121444987
417	3	0	0.457191107090696
486	0	0	1
2838	12	0	0.883081421165987
3819	12	0	0.56364992396405
832	4	0	0.273400956609147
177	2	0	0.0253577232570003
5230	12	0	0.730203533575475
2689	12	0	0.579983285695236
1026	4	0	0.992136168663473
1137	3	0	0.999468642629248
3405	11	0	0.366678524623203
994	0	0	1
777	4	0	0.57702748981688
1401	4	0	0.85962358292522
1060	1	0	0.863386984295735
1082	12	0	0.0511398022617
2324	10	0	0.638481179703529
2102	10	0	0.066751509918819
3573	12	0	0.424814574670681
1119	2	0	0.850671055008554
9646	58	0	0.926312477820609
3675	9	0	0.948320803722219
1509	5	0	0.753701332800229
5041	12	0	0.983080274598695
1056	7	0	0.322726992553037
2001	5	0	0.949098439051261
2394	1	0	0.999304937256852
933	5	0	0.417996818130948
1192	3	0	0.529200797849114
1242	6	0	0.0995733277235538
3385	17	0	0.374559575942276
2204	4	0	0.984887716354101
1277	2	0	0.861057497711795
3204	2	0	0.999889058206694
1895	6	0	0.830107500213327
675	3	0	0.438622672676418
1377	5	0	0.651428792335478
1770	5	0	0.925752751036284
1371	8	0	0.360625248083081
822	4	0	0.311977352179759
2496	13	0	0.544838233419866
2337	9	0	0.784764094054807
2101	11	0	0.520007362940002
1686	11	0	0.235304460581842
2494	7	0	0.844455238214325
1326	4	0	0.740636035778007
1420	7	0	0.337298473820694
1023	7	0	0.257013011662016
1941	2	0	0.99849083418637
1316	5	0	0.717948928698623
2127	1	0	0.99231772400331
5529	16	0	0.725892317121594
834	1	0	0.994615286472472
874	0	0	1
930	3	0	0.71081247395196
4749	22	0	0.981715512400187
1941	11	0	0.208124896361491
3078	6	0	0.995471539217829
63	0	0	0.999999999999986
198	1	0	0.568188322061665
180	0	0	1
264	1	0	0.597530366314742
369	3	0	0.0884919956574997
222	2	0	0.112393635720128
1394	6	0	0.650262535706943
1338	1	0	0.960561693920608
1707	3	0	0.998180412917738
1506	7	0	0.524265068750075
843	4	0	0.229177327337078
1446	3	0	0.614129810536771
798	5	0	0.200124561648238
960	2	0	0.933525245999743
2853	8	0	0.991935715936703
2670	13	0	0.763444215008402
606	2	0	0.634844147625862
2202	3	0	0.982143904138031
2856	7	0	0.746964439472618
17827	44	0	0.742204253955346
993	5	0	0.19111039512426
732	2	0	0.568252357952594
30	0	0	0.999999999999986
1487	5	0	0.821870275094717
1158	7	0	0.21524454967627
1636	9	0	0.0369518289330012
1344	3	0	0.5855170169914
1007	4	0	0.624847245331931
2036	5	0	0.949108136062565
1236	5	0	0.986769282747664
3897	12	0	0.548522678737757
1198	6	0	0.153304335855444
2871	10	0	0.649353395994345
2331	11	0	0.345256517761049
633	2	0	0.227195968974887
1167	4	0	0.670848582809336
2298	11	0	0.89988379194657
1841	3	0	0.946013636181807
1792	8	0	0.26365606460697
840	3	0	0.692319014204188
3150	8	0	0.980909183502666
2976	9	0	0.998095990471378
2742	19	0	0.555510384043675
2349	7	0	0.970413533624602
972	7	0	0.201935764008728
591	1	0	0.987898406328778
495	3	0	0.305331198889655
168	0	0	0.999999999999962
339	1	0	0.709761042493901
408	0	0	0.999999999999961
438	2	0	0.686141512961843
384	0	0	0.999999999999969
597	3	0	0.71574302726071
297	0	0	0.999999999999957
318	0	0	1
171	0	0	1
783	4	0	0.360814030953827
372	1	0	0.89418462809006
276	1	0	0.344061470145882
465	3	0	0.516525037437413
51	0	0	1
123	0	0	1
39	0	0	0.999999999999999
114	0	0	1
618	3	0	0.194644665362105
48	0	0	0.999999999999991
348	1	0	0.682298144754389
1251	7	0	0.866759475743997
759	2	0	0.804976370820674
351	0	0	0.999999999999991
495	1	0	0.840573643305278
384	2	0	0.522484257020462
384	0	0	1
2922	7	0	0.922987352082856
2637	6	0	0.945859044357738
2216	8	0	0.733755697554857
1793	5	0	0.912039412329063
824	0	0	1
1143	12	0	0.00305748346632764
2427	7	0	0.659975102103954
895	3	0	0.908157488684606
1191	2	0	0.987030493399862
1101	4	0	0.907217840166655
354	2	0	0.32459276216096
816	1	0	0.942843215662948
4380	12	0	0.909792739317425
1755	7	0	0.18116380159522
1566	3	0	0.730328759886381
1098	3	0	0.619231217291584
1320	3	0	0.724105144433329
3652	20	0	0.115418376809669
6296	23	0	0.951259372260877
2625	7	0	0.980075320712819
6192	19	0	0.980564180529481
783	3	0	0.618267637020164
555	4	0	0.120135954913985
2160	8	0	0.53093673273655
1281	3	0	0.779089141544268
984	5	0	0.459124875208755
980	5	0	0.699811765725178
582	0	0	0.999999999999979
546	1	0	0.731790519705383
1067	6	0	0.394268758177941
1653	2	0	0.799665296516528
1860	6	0	0.708286787039778
5823	19	0	0.749803451571404
2309	8	0	0.652342266474621
1782	3	0	0.850091150438532
330	1	0	0.417918658921782
1044	14	0	0.210301906672035
1063	2	0	0.802078158618333
1248	2	0	0.965213590423339
1158	2	0	0.998495104597345
3120	13	0	0.934785796367235
1556	5	0	0.314428643674928
805	8	0	0.00520505097687358
270	1	0	0.497569378024737
962	10	0	0.0234978486029662
894	2	0	0.798512382138066
1164	6	0	0.508817912083616
1819	8	0	0.298124322405255
4500	15	0	0.252269246821469
1740	7	0	0.245521987270068
1017	4	0	0.555781765431351
2217	7	0	0.198891059635369
768	1	0	0.984001599650616
1857	4	0	0.591578529735104
327	2	0	0.369045478293305
881	3	0	0.517467499142028
2612	8	0	0.993188045030431
1395	2	0	0.900239674749444
702	4	0	0.798011653523894
1553	3	0	0.856571124591447
2139	7	0	0.841499432646494
783	2	0	0.837000350260784
1860	4	0	0.964662567197598
1415	6	0	0.225702321428969
618	0	0	1
399	2	0	0.507065323850254
1350	2	0	0.862775104710987
4066	6	0	0.98859447695387
369	1	0	0.668772998398195
624	0	0	0.999999999999917
1905	8	0	0.661113496766325
654	3	0	0.791325207091943
1002	5	0	0.830246503652472
369	1	0	0.793910474453452
438	0	0	0.999999999999992
1064	4	0	0.171696937332717
1178	2	0	0.706566905542774
372	0	0	0.999999999999944
711	3	0	0.868717567236448
948	2	0	0.840782941329493
910	0	0	0.999999999999902
552	2	0	0.589529148965877
2397	14	0	0.172054869642224
1043	5	0	0.497523814275898
882	1	0	0.928685197685775
855	1	0	0.9214950964005
444	1	0	0.765889745678235
756	1	0	0.80064521802002
640	3	0	0.20879573000898
672	3	0	0.375395694530738
2046	6	0	0.396861197205358
3023	6	0	0.896013696701545
282	0	0	1
1146	7	0	0.38338290582078
765	4	0	0.35440280595548
348	2	0	0.413675271333316
594	4	0	0.894745946119211
595	0	0	0.999999999999977
1440	5	0	0.81144047282971
641	1	0	0.993621570082328
297	1	0	0.580582644980013
1844	5	0	0.999889314958315
990	3	0	0.982429585263954
732	4	0	0.354410801189755
2144	5	0	0.860865386404216
7377	12	0	0.994494042629056
663	2	0	0.859700542952045
879	6	0	0.174710804411472
1416	5	0	0.942453326632416
586	3	0	0.616644852996809
417	0	0	0.999999999999979
2145	7	0	0.637042317259318
2043	7	0	0.761823944978499
2150	10	0	0.0962060160698199
621	4	0	0.229372938666305
333	4	0	0.133793891608378
273	3	0	0.0907869746536041
2853	9	0	0.797920751209101
1026	7	0	0.512620865475279
1239	3	0	0.887783819992852
1134	1	0	0.99484586506309
1344	10	0	0.319674895234498
2343	15	0	0.0991425014875895
1584	4	0	0.751176688504653
633	2	0	0.598662625671576
2889	6	0	0.993637035254752
207	1	0	0.609159768338461
1206	3	0	0.755542329057783
1987	7	0	0.91015436193787
3288	16	0	0.0261237440538925
1959	9	0	0.356140225524383
1635	6	0	0.402793096919061
1335	6	0	0.441879250263196
999	2	0	0.542598147593644
609	3	0	0.584853035484756
1083	1	0	0.982444111849218
2550	14	0	0.171788815936108
4897	8	0	0.999725540501982
1125	4	0	0.781544516417892
876	1	0	0.912971340415053
1672	13	0	0.847438545135399
825	2	0	0.761500391364465
762	2	0	0.469744645485641
2274	9	0	0.480963019772708
516	4	0	0.129904051434939
624	4	0	0.144999054391949
549	1	0	0.723181750994552
2239	7	0	0.316933408892931
595	2	0	0.610212524468728
1488	5	0	0.838865209318891
2007	11	0	0.682319704003799
1090	0	0	1
804	2	0	0.874739030641486
4656	15	0	0.932829310518515
633	0	0	0.999999999999933
1137	5	0	0.274821459244608
2538	5	0	0.995538457622085
389	1	0	0.71695133263661
961	1	0	0.995628514038539
3864	9	0	0.89608600128868
1545	2	0	0.872991306239655
450	0	0	1
4383	14	0	0.606824028524675
1527	6	0	0.414283105024346
618	3	0	0.206056641401037
1703	2	0	0.97949881082994
1347	4	0	0.748041922590314
1374	8	0	0.155260526653695
1021	3	0	0.808872292323395
1356	5	0	0.679080121580371
1383	3	0	0.92076959553334
1440	4	0	0.829893881441121
1353	5	0	0.848640726918473
1236	12	0	0.271534696523895
6120	17	0	0.351921859650543
678	0	0	1
690	5	0	0.347278585964958
1122	7	0	0.203892053207541
714	1	0	0.906745242719174
2345	4	0	0.950043606120141
1832	8	0	0.98707437234218
487	3	0	0.324977037769404
603	2	0	0.653872782060653
3309	40	0	0.0494335721797263
291	0	0	1
375	0	0	0.99999999999999
465	1	0	0.752112626709964
597	3	0	0.315836726156227
2862	12	0	0.052539565276852
1682	3	0	0.881570352419104
210	2	0	0.181232867037476
1545	3	0	0.806132485285879
2372	11	0	0.329852800551506
1269	1	0	0.999203515339804
1237	3	0	0.712618466864047
1877	9	0	0.56561824164687
672	1	0	0.74222529209231
1176	2	0	0.868246147298438
585	1	0	0.933888168054217
450	2	0	0.524747574257348
2347	6	0	0.583938881096853
363	1	0	0.829279182389677
1893	7	0	0.439148003019297
2907	12	0	0.301769018899399
3522	8	0	0.849207692914528
1511	2	0	0.936679563995219
1239	5	0	0.110716840763452
1455	4	0	0.768656554983891
1206	1	0	0.950475635577918
2063	9	0	0.594065926072753
2343	6	0	0.833175637853675
687	1	0	0.830707739627943
2712	18	0	0.214086151621499
1119	4	0	0.269829564100244
867	0	0	1
887	3	0	0.812805576919984
1506	2	0	0.982059798150317
3129	12	0	0.607951342494957
1728	7	0	0.0313158454645426
1149	5	0	0.962881221500546
5450	34	0	0.962444819686617
9897	36	0	0.993089930325878
1014	5	0	0.405189044949107
714	1	0	0.815701638614591
3423	13	0	0.0430091336501679
1191	18	0	0.0134196525153343
1452	9	0	0.360490423034735
1740	5	0	0.738095452128371
222	0	0	1
3864	14	0	0.450299927535949
1582	3	0	0.796649011350921
1167	8	0	0.107523471819022
3926	15	0	0.624041969012118
1428	5	0	0.896360930755414
2133	3	0	0.967832034181707
453	0	0	0.999999999999974
1095	4	0	0.522501237264356
1944	4	0	0.750331185603365
3626	19	0	0.890708933494364
1032	3	0	0.727986250752861
458	4	0	0.0431064481441123
821	2	0	0.718201668515323
14271	38	0	0.999920123252655
1305	2	0	0.871580750158402
1218	5	0	0.382687101859899
2274	9	0	0.5149247153665
639	1	0	0.938489903663553
1342	13	0	0.195450886435755
1260	0	0	0.999999999999912
6342	36	0	0.959801549074599
1860	8	0	0.495471662939632
1878	2	0	0.985011976580834
12945	35	0	0.999817267948238
2604	7	0	0.966261958086478
1405	3	0	0.588502351955932
1476	7	0	0.166209589004325
1200	2	0	0.979791438017457
1473	10	0	0.0290127631820758
4670	5	0	0.999496300584696
1605	5	0	0.799519762405564
1007	1	0	0.888799579529786
1022	5	0	0.393117965889445
498	0	0	1
1119	4	0	0.83580591857447
1125	0	0	0.999999999999954
2724	4	0	0.892725221137317
860	2	0	0.816946251642774
1005	3	0	0.921940743612307
1720	8	0	0.76160813472758
2867	7	0	0.858092583409755
1503	4	0	0.883987072617004
2196	6	0	0.909530233359994
1279	2	0	0.956657866638666
1272	4	0	0.367278119570381
1544	9	0	0.330351225146062
5981	27	0	0.631977833529162
1869	6	0	0.862779993591486
627	1	0	0.965419300692776
1555	2	0	0.964969084866094
1807	6	0	0.582254507680875
1540	10	0	0.0662748785005858
1836	5	0	0.797066945043862
2205	7	0	0.845022203723994
1056	0	0	0.99999999999997
3263	11	0	0.983985073871698
735	1	0	0.722871379524787
675	2	0	0.625173733500619
1281	4	0	0.998870609203792
1020	1	0	0.904265024651579
579	4	0	0.404988370906084
580	0	0	0.999999999999946
1548	7	0	0.383608489152094
13928	79	0	0.999999296232845
410	2	0	0.159032980908746
1479	4	0	0.817062381448697
2306	2	0	0.994717725809259
555	1	0	0.872813094503176
1875	5	0	0.420661319316126
1143	2	0	0.720757459184718
2004	6	0	0.599302176632824
1183	4	0	0.924329539786652
651	2	0	0.913080355724226
720	7	0	0.400412867369173
621	1	0	0.990637709813294
636	3	0	0.760954531919017
1114	4	0	0.367545040826226
1314	2	0	0.998700120434235
429	2	0	0.334122475005091
2025	11	0	0.132781263210683
3054	9	0	0.512333701651363
2326	23	0	0.150192470322931
774	5	0	0.103349575157193
819	3	0	0.336472420698009
864	2	0	0.763161890553022
732	4	0	0.840226575238814
816	2	0	0.834967035402869
879	7	0	0.0958475213695885
1504	4	0	0.750180324725338
1511	5	0	0.742805264432366
390	0	0	1
747	1	0	0.573302594483932
1593	1	0	0.999994254661031
220	0	0	0.999999999999967
339	1	0	0.667445785271919
378	2	0	0.465762342190806
1614	1	0	0.990713948645329
2031	8	0	0.42691781579904
1296	6	0	0.849725891029233
1824	18	0	0.00552391043332244
372	1	0	0.744779288078562
2901	7	0	0.814051873736746
942	1	0	0.98458829490245
1895	2	0	0.99557412282032
1851	6	0	0.481347882525847
1258	3	0	0.949501857796675
1911	8	0	0.744287923607595
2028	10	0	0.87723379717879
1080	8	0	0.401321093122425
885	6	0	0.246414840118509
895	10	0	0.0412275868577131
228	1	0	0.352303518979247
459	2	0	0.350854682876889
1534	5	0	0.294973827371644
1413	7	0	0.356942905321445
1272	7	0	0.769168961179766
2407	11	0	0.712309213838749
2976	20	0	0.97087393498521
2871	12	0	0.997961525381214
3875	20	0	0.932935858520148
633	4	0	0.15056897013282
1752	5	0	0.449799588968525
2355	20	0	0.283362292897928
2251	8	0	0.778317687255272
432	2	0	0.534960535381624
1050	9	0	0.0201365646257523
444	2	0	0.690473651779399
555	5	0	0.412438771931554
444	2	0	0.734181386061718
444	1	0	0.891955765026963
506	1	0	0.973705593519631
1251	8	0	0.860487101308804
3480	23	0	0.476607866661249
267	2	0	0.449120207500125
1616	2	0	0.923024178446556
3648	10	0	0.685293657801783
1086	0	0	0.999999999999893
2244	4	0	0.970907535313118
3597	12	0	0.359574490021384
1389	4	0	0.922596511755642
489	2	0	0.613611001197227
840	5	0	0.345543005479339
953	4	0	0.586197297861109
1941	12	0	0.0231143186323333
549	3	0	0.301725287339079
930	2	0	0.834115233833951
1573	6	0	0.94556205955738
1345	4	0	0.914857259994594
900	2	0	0.728172685999894
3135	6	0	0.968707340963619
687	3	0	0.13878156533686
378	0	0	1
399	1	0	0.757982337861837
402	3	0	0.113155411365298
399	0	0	1
1068	1	0	0.742132193824577
720	1	0	0.979960727512407
2982	11	0	0.67485145420501
3981	12	0	0.922716956247354
4381	27	0	0.983769486439524
1744	5	0	0.90670190989338
713	0	0	1
582	0	0	0.999999999999976
1359	4	0	0.615305991189873
501	3	0	0.188917438557893
2757	9	0	0.829234051977419
3777	17	0	0.102125682127272
603	0	0	0.999999999999897
1819	13	0	0.726245293828204
333	2	0	0.414936922712774
2988	5	0	0.977308563893654
3060	13	0	0.189946064111263
3117	8	0	0.492515108890435
1571	5	0	0.679853112268165
1068	2	0	0.947268060781802
1575	4	0	0.71074074825409
1641	7	0	0.174254682202303
1882	7	0	0.407995692117502
1787	2	0	0.739026164694958
84	0	0	0.999999999999977
1962	11	0	0.980651892281209
1790	10	0	0.975544029877516
312	2	0	0.208776442986631
1173	4	0	0.885644032986417
1176	7	0	0.523973430360176
1280	1	0	0.996350881628324
1021	3	0	0.602904329545603
2036	8	0	0.80874475786962
768	2	0	0.57830152963531
783	4	0	0.229128279458857
1663	2	0	0.985436775086167
3651	11	0	0.467886226693787
1572	5	0	0.844472573418236
1521	4	0	0.960099493111221
3354	13	0	0.536761483734008
5568	17	0	0.994741170831739
7809	19	0	0.969119409339169
2697	10	0	0.589767617672981
2444	17	0	0.52776559975801
2317	8	0	0.474107920458278
1752	4	0	0.981783413022579
681	7	0	0.136143806950561
471	1	0	0.766411504448248
837	2	0	0.285283368819115
534	4	0	0.00555288416457197
717	2	0	0.184841700289866
687	5	0	0.00286760724002398
714	4	0	0.0141706782673809
390	1	0	0.316036090504171
498	2	0	0.835900319461768
564	19	0	5.36151746222011e-07
510	1	0	0.969882018815127
646	1	0	0.584387110020537
1153	7	0	0.203351984922763
999	5	0	0.233216623676907
1181	3	0	0.369865618997628
999	4	0	0.281557624386976
1155	2	0	0.901626495897154
1014	4	0	0.775615682873223
2860	8	0	0.644027332686909
594	0	0	1
696	1	0	0.945117909350708
1189	4	0	0.732534441102065
2033	6	0	0.712758428975267
5718	15	0	0.916307411602579
4848	19	0	0.851106606335594
879	1	0	0.998813891125391
1989	15	0	0.0461581987199801
1923	20	0	0.159942918302773
1026	9	0	0.109026513460807
1629	3	0	0.8431054464108
717	3	0	0.676410590987646
1603	5	0	0.126961395939288
1457	7	0	0.541148822257846
3922	5	0	0.993930372726255
1041	7	0	0.712580323861991
969	1	0	0.968996132604471
978	2	0	0.90043922409377
5112	15	0	0.75599175578041
2544	9	0	0.597408749764358
2463	7	0	0.735230922592968
2446	7	0	0.946883374222364
2207	10	0	0.585972837391839
2367	9	0	0.375021947043031
2439	6	0	0.757836046947161
432	0	0	0.999999999999917
1862	10	0	0.337723124413016
1977	6	0	0.843765821074875
749	1	0	0.870891911055806
723	1	0	0.769813917579235
1310	3	0	0.803464151482133
1740	3	0	0.806220561785677
3650	5	0	0.991690968469381
2088	12	0	0.18217146097025
1431	2	0	0.975222079844158
1534	10	0	0.242492771868903
1410	7	0	0.42229567732421
1452	7	0	0.56996217713437
786	7	0	0.442888750256551
1542	2	0	0.995521454846173
1434	5	0	0.715850159828463
804	3	0	0.53130976339259
1404	3	0	0.924263357658064
807	1	0	0.619297293844507
1005	2	0	0.953208118260264
2151	6	0	0.735014704298055
953	4	0	0.840438858380284
648	2	0	0.633569682986575
742	5	0	0.153951466434355
2163	10	0	0.53194731821626
966	7	0	0.124864393421744
939	5	0	0.658887929744002
1299	5	0	0.775753497756658
870	3	0	0.935061370113392
969	4	0	0.908506279378086
993	4	0	0.873241128087518
969	6	0	0.439419089354063
969	5	0	0.541195748340904
652	5	0	0.0592570105601151
756	1	0	0.888725430303782
528	0	0	0.999999999999964
908	2	0	0.906538621344235
940	5	0	0.749417160484874
697	3	0	0.172200307799723
641	0	0	1
2784	10	0	0.713280887497144
804	8	0	0.181311541294463
804	1	0	0.995507738807547
459	1	0	0.889445279928528
2184	15	0	0.439072420523145
723	5	0	0.437078620991996
969	8	0	0.204129872774837
894	2	0	0.976343420123149
735	1	0	0.93834289947352
645	4	0	0.479911848429712
720	4	0	0.423073676417453
799	12	0	0.0235803766156104
603	3	0	0.682742379498007
1002	4	0	0.682745692779321
444	2	0	0.794972829289188
738	8	0	0.0421742938166174
753	3	0	0.821694797914788
1680	1	0	0.999917923780974
1038	2	0	0.974985729858281
2007	8	0	0.208975523810808
912	3	0	0.417855041987387
1531	5	0	0.800252212463114
1932	2	0	0.986998069517821
1089	16	0	0.0550906960110037
75	1	0	0.272652359214674
1086	7	0	0.634774347265449
8501	45	0	0.98522506414183
1860	10	0	0.0656319615047996
17298	86	0	0.999912184444478
7320	20	0	0.998970563810967
1656	4	0	0.771076448778245
3828	16	0	0.850593373418909
942	2	0	0.898643987276305
6682	26	0	0.937438200565352
3675	14	0	0.714795636137028
714	1	0	0.78392253501042
2343	12	0	0.842685172796402
2380	6	0	0.725244975580123
2139	7	0	0.959406976023668
1167	1	0	0.96722133725324
1434	1	0	0.994727393882515
3078	5	0	0.954793914956287
7679	32	0	0.39810668616983
2830	10	0	0.899726202264296
4547	14	0	0.932545291710387
1365	1	0	0.990376839081271
345	2	0	0.227580335406424
412	2	0	0.244985623765719
1124	1	0	0.748593141151261
633	1	0	0.761854196094535
1395	2	0	0.938285168260109
2517	20	0	0.491712102531173
1777	2	0	0.979578534704711
4007	3	0	0.999648854897544
1968	17	0	0.237389199983844
3282	24	0	0.450526188016221
2679	7	0	0.994707348229792
3088	11	0	0.54768340713866
795	8	0	0.0179048401932949
1947	10	0	0.770354000279902
2409	21	0	0.0143288261634867
4284	12	0	0.915618040704419
1536	5	0	0.399693576761755
237	0	0	1
726	4	0	0.138017984981994
5404	16	0	0.999392653852696
1222	13	0	0.220935377628922
1271	0	0	0.999999999999953
912	2	0	0.841432352861586
729	1	0	0.963639399712232
4475	9	0	0.865042775143741
1915	6	0	0.648057017625043
1681	8	0	0.64729640281116
1856	11	0	0.588110654364191
1635	9	0	0.461055468346721
822	2	0	0.792093255414697
872	4	0	0.746484468337461
1209	4	0	0.8865293424725
492	2	0	0.667070130108176
369	2	0	0.616193068532276
1126	12	0	0.323889927450945
912	4	0	0.725619167712205
945	7	0	0.348656954561188
948	10	0	0.120363917308846
966	3	0	0.895640585988292
945	7	0	0.319135616926242
906	11	0	0.154058174594865
939	6	0	0.503253121463155
936	8	0	0.40728507771601
999	9	0	0.257132804247233
936	3	0	0.982206881237847
936	7	0	0.483320703446584
936	9	0	0.305660829331919
960	10	0	0.505490802328312
996	3	0	0.963276673971269
930	4	0	0.434505673807736
918	4	0	0.806707862345051
978	7	0	0.494467583193728
978	6	0	0.582106942570582
951	5	0	0.424096838988768
951	6	0	0.400583724031801
963	0	0	0.999999999999923
927	6	0	0.646307140943355
993	3	0	0.940493422638012
1035	19	0	0.000797456044790511
987	14	0	0.0224785246292951
930	7	0	0.321197914341023
948	9	0	0.320559224813913
930	5	0	0.341668223075729
933	8	0	0.362761819384891
930	11	0	0.06824454724144
930	10	0	0.159041191362873
1113	15	0	0.0889053618363643
933	11	0	0.18077387964191
990	11	0	0.0293487051208857
930	14	0	0.0160397188015947
981	17	0	0.00027294421077655
930	5	0	0.850900481363266
936	4	0	0.806702468831581
936	8	0	0.150510368371224
957	10	0	0.0844868738340719
945	10	0	0.0687488825720094
945	4	0	0.802919831734149
939	14	0	0.00372381875210281
930	6	0	0.546977528279554
936	9	0	0.289976710001533
918	5	0	0.423083777597973
912	11	0	0.00306641097347414
942	4	0	0.928061086636605
942	11	0	0.135306145828233
939	6	0	0.703261944117801
939	10	0	0.2262894705798
933	8	0	0.491264288264054
939	6	0	0.850175525294271
939	11	0	0.261321199284731
975	4	0	0.950056539256737
957	1	0	0.998263539376547
963	11	0	0.109460091570194
960	9	0	0.547539699013015
1029	4	0	0.949367040492569
966	6	0	0.807049669032294
945	5	0	0.93089511895554
909	9	0	0.308228617636969
945	8	0	0.400696389915941
939	6	0	0.761239324482558
951	12	0	0.248055288657094
948	10	0	0.214364528058987
981	11	0	0.232350045414264
954	11	0	0.28768660879477
972	11	0	0.17080403644721
1065	7	0	0.701822435496898
966	11	0	0.147399131184582
939	8	0	0.619373398152997
951	10	0	0.216098557178865
813	8	0	0.157224295992284
972	9	0	0.255550925469212
945	5	0	0.772911510009449
1008	6	0	0.582541242415834
957	4	0	0.905449418209878
978	8	0	0.552944113634526
939	15	0	0.00940914336147743
954	8	0	0.571728877013896
954	6	0	0.762859966927306
963	9	0	0.43598712521792
1047	5	0	0.874212344304868
1053	10	0	0.189815684350444
936	14	0	0.0377424733303625
945	5	0	0.79311051954218
945	6	0	0.708458707682779
990	11	0	0.208744727516949
954	6	0	0.794834988003048
963	6	0	0.664537546185252
966	3	0	0.969746953920184
966	12	0	0.0116907803069538
975	7	0	0.534827435856419
1185	10	0	0.428802001438852
963	1	0	0.992677337276915
957	7	0	0.673813122851353
948	7	0	0.689483118149395
1098	11	0	0.483875913108026
975	8	0	0.226389268177079
867	13	0	0.00502390296332833
960	7	0	0.45979661778264
948	6	0	0.470756705008455
975	7	0	0.518011002808125
930	12	0	0.00749416511352031
936	4	0	0.659916170435077
954	4	0	0.921410695749768
933	1	0	0.997304591045619
975	12	0	0.0690283766692121
945	5	0	0.804204139515848
945	7	0	0.317170573337528
930	7	0	0.577530783668227
930	8	0	0.361081192527888
945	8	0	0.218729250218442
945	10	0	0.286113256314671
945	10	0	0.229869153440954
987	9	0	0.527592576896163
942	19	0	0.00142736053454527
945	21	0	0.0002371133621766
945	10	0	0.222850911968584
939	13	0	0.0396999785089522
936	7	0	0.63466144101953
936	11	0	0.172189052931091
948	7	0	0.759721366443954
918	15	0	0.0137426586781681
948	7	0	0.741579633950751
924	13	0	0.0498719897422763
936	4	0	0.945376732900409
933	9	0	0.399271459915882
969	3	0	0.979851380819178
936	3	0	0.945629629274583
975	3	0	0.971088201250343
981	14	0	0.0447201907486218
1080	11	0	0.206390618479861
1023	13	0	0.0311241890222619
933	14	0	0.0231597910741708
984	11	0	0.0127564754303197
942	8	0	0.262462356733406
954	8	0	0.258829345942098
972	11	0	0.0706208074518665
939	4	0	0.665685672295929
981	8	0	0.605141339423626
933	7	0	0.518804134982382
942	5	0	0.740919257544544
942	7	0	0.507550023530279
930	10	0	0.287989178574525
936	8	0	0.372496873949745
927	11	0	0.20455748089011
936	10	0	0.257485836141615
945	9	0	0.109473563685546
936	6	0	0.469438190422697
1041	10	0	0.0802547159582746
936	16	0	0.00598356035985955
939	22	0	9.8672196226708e-05
939	7	0	0.611988980698692
933	4	0	0.962407254781664
951	9	0	0.348615960189809
948	10	0	0.380368629367144
960	9	0	0.437558982601455
939	10	0	0.203734410978711
924	6	0	0.589888509878987
930	22	0	0.0133512466609647
918	2	0	0.98825607806357
984	11	0	0.145002587265866
945	6	0	0.441110185007936
933	8	0	0.422155842189217
945	8	0	0.632141613314367
448	2	0	0.406066474789212
2640	9	0	0.693447791918235
2424	3	0	0.988319744006527
8783	57	0	0.99073226396929
1119	1	0	0.970382580080598
1695	10	0	0.899015059009973
804	2	0	0.796499261339342
1194	7	0	0.380936364717262
1134	4	0	0.739985131278868
987	5	0	0.202607548118335
1822	6	0	0.599009507458629
1411	6	0	0.0903025079413123
2892	7	0	0.842528098768224
1275	4	0	0.649177334560371
1705	1	0	0.987579329880201
2214	11	0	0.264951707212875
1281	2	0	0.989859379090802
1179	11	0	0.385026499213305
1493	9	0	0.188007593280282
381	1	0	0.820530644979005
342	1	0	0.824089413557031
297	1	0	0.736070218608076
297	3	0	0.0979095769581855
2313	4	0	0.832847286918021
1311	2	0	0.993436545566821
4668	24	0	0.055719562398525
6105	11	0	0.990089525103691
3759	15	0	0.145758658362004
913	4	0	0.352875070794705
2920	13	0	0.426866155528612
3339	17	0	0.349917678962031
1113	11	0	0.108155762804449
1621	4	0	0.577727026077586
1831	7	0	0.600035453894318
1566	7	0	0.43509462791372
1100	4	0	0.590771512634038
1361	1	0	0.992153164594519
1872	6	0	0.979191733715489
1361	7	0	0.771828662873499
1367	4	0	0.421620597230933
1869	3	0	0.885124040981565
2802	10	0	0.999931251833677
2069	1	0	0.993546068482114
459	0	0	1
4344	18	0	0.23443513227895
855	3	0	0.735981719638078
4950	14	0	0.938834515455583
2733	6	0	0.95653399271919
1011	1	0	0.789640663356844
5061	11	0	0.939649397526057
3735	13	0	0.499973661601632
2626	7	0	0.934478876430472
1419	6	0	0.837698324072364
2394	7	0	0.982434312224233
489	1	0	0.865432825804867
484	3	0	0.442416248262374
3705	8	0	0.982653099355809
3828	9	0	0.999122312609379
732	0	0	0.999999999999941
1515	1	0	0.990631829443716
1860	6	0	0.525540953830598
1401	9	0	0.0115917196290214
352	2	0	0.242348821237412
519	0	0	1
204	1	0	0.297110141951203
1345	2	0	0.944966496818444
3617	19	0	0.314378534910814
2724	8	0	0.984828570707659
1203	4	0	0.402484701267729
1026	3	0	0.371566851306231
477	1	0	0.802630426985335
1352	4	0	0.76703132995498
2077	4	0	0.73252854799359
1494	4	0	0.725816244966824
2704	7	0	0.645468866030339
1554	2	0	0.912122856932526
3519	11	0	0.874938068991776
1536	9	0	0.578099930734558
645	2	0	0.497580082187889
669	2	0	0.693900064967661
678	2	0	0.690537176974451
882	3	0	0.942824330779488
2286	8	0	0.303256829087211
1596	5	0	0.69148225240686
1515	2	0	0.946023464715509
1107	3	0	0.738456072499119
681	4	0	0.191536043351379
1428	6	0	0.145681635115315
829	0	0	1
1320	2	0	0.875849533552827
1216	1	0	0.963099354586514
1464	2	0	0.974571905575576
1188	2	0	0.995150590935094
348	1	0	0.680123151213659
715	3	0	0.241209839734152
1845	3	0	0.999083186214503
621	5	0	0.10991724794854
4019	18	0	0.108122439500887
438	0	0	0.999999999999962
1446	5	0	0.275833651946645
1984	4	0	0.934662674198638
2529	10	0	0.795919444685521
5328	16	0	0.499882803320569
606	2	0	0.581275415043417
620	3	0	0.28929284929526
636	2	0	0.860695368048333
654	3	0	0.624724016179674
1301	2	0	0.966127794678646
733	2	0	0.426057101978636
1176	5	0	0.122401891597811
3132	13	0	0.62394446550729
1584	8	0	0.145139393955067
1570	8	0	0.59979184155055
598	1	0	0.724983736423825
1941	6	0	0.804672078538961
1185	3	0	0.806023769015536
1040	4	0	0.51888048389411
2131	4	0	0.946779554963965
1176	1	0	0.868821643898902
1781	5	0	0.671547739908754
1038	0	0	1
1179	9	0	0.991538719101213
990	3	0	0.384560485909122
1097	2	0	0.983571781317124
1572	0	0	1
1819	6	0	0.361184715698053
1757	1	0	0.991222364227371
1293	4	0	0.571848178433074
780	2	0	0.561999354536577
660	2	0	0.567168674374043
576	1	0	0.825634956574434
1184	5	0	0.548112033862893
1702	1	0	0.986993593874946
2416	4	0	0.971451511188806
744	3	0	0.497081531854651
994	2	0	0.715263092023361
697	2	0	0.56462289347619
2127	5	0	0.648962018890011
2112	9	0	0.0299142000195079
1302	3	0	0.689413847853023
1386	4	0	0.595748607407031
4255	18	0	0.980691882548497
3024	8	0	0.991799575493826
1056	4	0	0.351453861665066
1016	2	0	0.960451601948133
465	6	0	0.0159591691412219
477	1	0	0.959031149331845
240	1	0	0.258912192735648
1136	5	0	0.0890015137495227
231	2	0	0.165056911204951
123	0	0	0.999999999999976
192	3	0	0.0207533206116867
444	0	0	1
117	1	0	0.0967327436487142
573	2	0	0.806214916198042
261	2	0	0.293573081433471
300	0	0	1
815	1	0	0.964314286925824
312	3	0	0.123491827967081
681	0	0	0.999999999999995
456	0	0	1
348	1	0	0.57048900185898
481	1	0	0.674271420833076
378	0	0	0.999999999999993
784	2	0	0.576955975555944
2319	6	0	0.970265529373859
1457	4	0	0.750448871680957
1134	5	0	0.43767508244452
636	2	0	0.530239778424632
2379	2	0	0.993462186528766
1371	5	0	0.64462434604947
4326	10	0	0.844189308334233
3289	6	0	0.675384824673607
1434	0	0	0.999999999999978
369	3	0	0.151139734199611
516	1	0	0.894150710578866
393	1	0	0.864119984900977
1434	6	0	0.315209560390363
1077	2	0	0.903664286381329
2403	4	0	0.98302223657899
5550	15	0	0.731920379226035
900	4	0	0.435841864079585
276	0	0	1
288	2	0	0.454039848297768
273	3	0	0.122098355016545
273	1	0	0.589378086537603
252	3	0	0.164840731832377
288	1	0	0.605816146468505
402	0	0	1
648	3	0	0.673669973030961
648	4	0	0.5293879589916
687	1	0	0.977121669132095
366	0	0	0.999999999999943
3087	8	0	0.874644722594044
2453	2	0	0.978915038723982
1377	3	0	0.918624162446528
1647	10	0	0.0330450634407204
1278	2	0	0.961479372794462
1525	1	0	0.985260189405816
2429	7	0	0.817137243057421
2688	6	0	0.855673042665374
5765	26	0	0.984485074267106
1572	3	0	0.819741108136212
2511	5	0	0.895528570430507
1522	6	0	0.745648365711331
2781	4	0	0.902036752240352
4110	6	0	0.991630494563082
3129	7	0	0.977715295758604
1254	4	0	0.545520512648967
1746	8	0	0.541143067816664
1749	12	0	0.790083572638481
1764	9	0	0.249928716911535
1630	9	0	0.798120802077582
1653	10	0	0.530810514055831
1662	6	0	0.923894619957167
762	3	0	0.397894428664285
1275	2	0	0.963925003934511
1795	14	0	0.115025907187548
1785	14	0	0.117469720702502
1692	9	0	0.32477876453156
1702	10	0	0.247292219649781
1662	10	0	0.339345898747492
972	4	0	0.532841009194656
867	2	0	0.758121967525514
1371	2	0	0.957304164891539
1095	4	0	0.699168544985157
1125	1	0	0.991182417926427
1515	6	0	0.415318136703388
1534	5	0	0.914865617720576
1356	3	0	0.727141022753601
1355	2	0	0.959785535178765
1989	8	0	0.331848059242351
1680	5	0	0.521783999670319
1515	6	0	0.276130523932537
1895	10	0	0.828697108039985
2394	19	0	0.698466273456967
2165	6	0	0.831429256414302
96	1	0	0.411700173390297
180	0	0	0.999999999999984
1936	7	0	0.560141552419323
1539	4	0	0.822940566612468
1029	3	0	0.772712756567752
3076	11	0	0.429038921107143
1212	5	0	0.649021657101842
6893	22	0	0.996234770656997
2538	7	0	0.994135370948226
456	3	0	0.122209976644042
504	3	0	0.809749602016893
681	2	0	0.468427082173229
882	2	0	0.908648014624018
1061	4	0	0.633019486661725
7332	23	0	0.944889993518848
2058	8	0	0.412832235121181
1917	5	0	0.353548880651021
1980	4	0	0.869462609360685
2130	3	0	0.953622508954026
638	0	0	1
2568	7	0	0.788680957048318
1033	4	0	0.611375178816094
3433	4	0	0.99898776962938
876	1	0	0.957196005197608
2095	6	0	0.718291224007504
1821	7	0	0.451595417368642
1545	4	0	0.951370683411362
2118	4	0	0.915596114603263
1029	6	0	0.182289399443706
1106	4	0	0.426818932758142
2701	10	0	0.16513520327447
234	0	0	1
1758	3	0	0.835919500529908
1266	6	0	0.412706464537394
1281	5	0	0.87544336959299
2061	12	0	0.23030285695085
1770	7	0	0.950306138199394
1537	5	0	0.999232780966104
6781	17	0	0.942314142243971
1854	6	0	0.122024683097194
657	0	0	0.999999999999948
837	0	0	0.99999999999996
1869	5	0	0.891327227248697
606	1	0	0.796311895168206
1014	4	0	0.282806575399478
1341	3	0	0.89222825159804
1275	6	0	0.603467058690238
1236	3	0	0.64692011009122
1158	3	0	0.886578683939518
2493	9	0	0.74624878453355
1302	4	0	0.850335534467533
1811	7	0	0.4721186905413
1335	6	0	0.316984132606327
6468	36	0	0.985475689118607
8310	42	0	0.921804815394696
372	5	0	0.00308518726062199
603	1	0	0.967325425847744
441	1	0	0.709371100031618
486	1	0	0.77531957560926
678	3	0	0.481359850318352
1587	5	0	0.99915424500335
1416	8	0	0.375429266196343
312	0	0	0.99999999999997
273	0	0	0.999999999999971
297	0	0	0.999999999999939
728	0	0	0.999999999999943
1257	0	0	0.999999999999828
732	2	0	0.851997734177281
627	1	0	0.571120471130418
588	0	0	1
697	1	0	0.906564242042497
3075	13	0	0.529981118055282
390	3	0	0.258921308564515
602	2	0	0.617270169128342
1464	2	0	0.923309204795261
804	2	0	0.726182346033569
507	2	0	0.106924895332528
1407	11	0	0.3223482794299
660	3	0	0.261149315787241
447	2	0	0.373193910685467
426	4	0	0.176125483082232
614	2	0	0.631870367444497
678	8	0	0.155839111701029
240	1	0	0.442591980500572
1252	4	0	0.379165616043913
892	4	0	0.280601302216394
828	1	0	0.939601968124507
651	2	0	0.641531811015273
723	0	0	0.999999999999958
666	1	0	0.780929251891545
1997	12	0	0.367532511818958
1314	4	0	0.859857071425463
1453	8	0	0.554404555595589
891	1	0	0.850808122803857
5190	18	0	0.436610961186302
564	5	0	0.262010686554446
880	1	0	0.98787281082593
825	2	0	0.739368583924212
569	1	0	0.834105065913963
701	1	0	0.90059810359763
1149	1	0	0.999994249628848
2259	7	0	0.936311800022569
1425	4	0	0.961951839470687
1696	8	0	0.134880456296657
1569	3	0	0.825073199481061
853	3	0	0.49213074587103
1844	8	0	0.455617224979986
1451	7	0	0.709853295327456
1497	9	0	0.381447271790277
1822	12	0	0.0494854827231782
1467	6	0	0.502867695160479
2235	6	0	0.95646115054977
1035	7	0	0.09567896320319
675	8	0	0.242121932494101
1359	14	0	0.184547275569905
1962	11	0	0.634443047221015
1359	1	0	0.99960565991448
1359	11	0	0.62694035816943
1359	19	0	0.0113936308275177
1758	8	0	0.703720438747831
2529	10	0	0.641363203708611
1350	11	0	0.490007603740632
1344	12	0	0.342570566428278
3748	12	0	0.67271391415509
1458	3	0	0.987047828513045
1551	5	0	0.741360696336256
1353	21	0	0.00492055627493046
512	1	0	0.510572538730164
2796	18	0	0.565050491737635
3531	14	0	0.999350170547204
768	1	0	0.877831031557891
1188	2	0	0.84031120889445
1062	2	0	0.865362185191317
747	2	0	0.802615118144351
996	4	0	0.884361436353248
774	0	0	1
990	4	0	0.781236621479204
2487	7	0	0.904063693813986
3632	12	0	0.936657818995189
570	2	0	0.81339536412362
926	2	0	0.806157166100154
1780	11	0	0.25759442961836
2739	7	0	0.790953671860482
1590	9	0	0.809426321845903
1950	8	0	0.434165069697586
462	0	0	1
3222	8	0	0.494957155926415
1968	14	0	0.777439578909514
1428	7	0	0.826144866716579
1017	1	0	0.914176985389066
930	5	0	0.118152261372034
943	1	0	0.937379052691761
1452	3	0	0.614711936268376
1791	5	0	0.925676353860707
555	1	0	0.83989569613414
2774	16	0	0.820910770137434
3277	15	0	0.341186355787657
2010	6	0	0.771516035170287
3061	6	0	0.995600323841906
4128	8	0	0.870964632631384
2165	8	0	0.529562026754515
668	0	0	0.999999999999955
2823	9	0	0.355392445175713
1011	2	0	0.952074179062572
1068	4	0	0.693920830101575
2349	3	0	0.995285008039417
988	5	0	0.630912497724578
603	2	0	0.811744529328709
2413	11	0	0.786614154016939
2868	5	0	0.998811930487766
1158	1	0	0.951530936567582
1941	6	0	0.67237634715727
1065	3	0	0.852186426823393
2379	7	0	0.334880998217948
1527	2	0	0.928454450373912
971	0	0	0.999999999999922
384	1	0	0.696246537211568
2082	5	0	0.707462218863747
1725	3	0	0.926190695263035
1760	6	0	0.254906754551798
2676	13	0	0.300137424363707
[truncated: 17,257 more rows]
