# Supplementary material for: Non-coding cancer driver candidates identified with a sample- and position-specific model of the somatic mutation rate
Source: eLife journal article supplement (doi:10.7554/elife.21778), 2017-03-31
Supplement: supp [file elife-21778-supp-v2.zip › elife_poa_e21778_Figure_4_source_data_1.txt]

p	type	id
7.19765731640984e-260	basic_model	TP53
3.81894625693002e-64	basic_model	MUC4
4.94181860731684e-57	basic_model	PIK3CA
1.71129840983924e-35	basic_model	KRAS
1.11089821969278e-25	basic_model	PTEN
2.64182797292062e-25	basic_model	PRSS3
5.1667296092317e-20	basic_model	KRTAP9-1
2.5879388747242e-15	basic_model	BRAF
7.14097419285844e-15	basic_model	GOLGA6L2
2.57307453899016e-14	basic_model	KRTAP4-5
1.96978389748127e-13	basic_model	AL390778.1
5.05100644147614e-11	basic_model	IDH1
5.9211778555681e-10	basic_model	FRG2B
8.83573147223813e-10	basic_model	ZNF99
9.89999252019134e-10	basic_model	MUC16
1.30933650991577e-09	basic_model	NRAS
2.42100297184507e-09	basic_model	NFE2L2
5.05731774588458e-09	basic_model	ZNF831
7.20460631436003e-09	basic_model	FBXW7
1.5717565674125e-08	basic_model	MUC17
3.11377967533077e-08	basic_model	AC093323.1
3.19031498686802e-08	basic_model	XIRP2
5.3821785690811e-08	basic_model	KRTAP5-8
8.51093861461241e-08	basic_model	FAM135B
8.6606291558802e-08	basic_model	BCLAF1
1.02112294446925e-07	basic_model	SERPINB3
1.15358380135253e-07	basic_model	IGFN1
1.21090185861086e-07	basic_model	KRT4
1.32466671975039e-07	basic_model	ZFHX4
4.48261891784356e-07	basic_model	PRAMEF2
1.31048670291605e-06	basic_model	PLIN4
1.5919635394669e-06	basic_model	TAS2R31
1.75367294319919e-06	basic_model	SPHKAP
3.36672502701824e-06	basic_model	CDH10
4.61787872286224e-06	basic_model	SPRR3
4.78772393071483e-06	basic_model	PRAMEF1
6.58608948951349e-06	basic_model	HLA-DQA1
1.23726836558541e-05	basic_model	HLA-DRB1
1.41640723405976e-05	basic_model	CSMD1
1.61174019882752e-05	basic_model	LRP1B
1.66489767105277e-05	basic_model	MUC21
1.80706312465939e-05	basic_model	ZNF208
1.8169664505289e-05	basic_model	CDKN2A
2.16603416403179e-05	basic_model	EYA4
2.2275125752152e-05	basic_model	ARMC4
2.28591546087473e-05	basic_model	POM121L12
2.5763349303231e-05	basic_model	DSG3
2.82507406019804e-05	basic_model	DSPP
2.9370213767865e-05	basic_model	OR8H2
2.95495207874512e-05	basic_model	PABPC3
5.76757209802332e-05	basic_model	C7
5.96508506140544e-05	basic_model	PSG2
6.8416992028046e-05	basic_model	ANKRD36C
7.30377867968665e-05	basic_model	IL7R
8.51984666186281e-05	basic_model	ZNF679
9.1911074843187e-05	basic_model	APC
9.57532060728933e-05	basic_model	CSMD3
9.97096395326423e-05	basic_model	PLG
0.000137110238261852	basic_model	NLRP4
0.000137652709437051	basic_model	OR4C5
0.000155712616493967	basic_model	MEI4
0.000155883585065231	basic_model	OR5F1
0.000157151559587616	basic_model	B2M
0.000189408624588208	basic_model	ZNF676
0.000228885582499174	basic_model	AHNAK2
0.0002480152228237	basic_model	FLG
0.000283453430495206	basic_model	OR4A15
0.00029462119395807	basic_model	MUC19
0.000302260338873687	basic_model	FAM230A
0.000318517801516086	basic_model	TMEM132C
0.000328270467318528	basic_model	TBP
0.000340921773232594	basic_model	PSG8
0.000358772431945746	basic_model	C12orf50
0.000396671769419197	basic_model	PRSS1
0.00041403457644399	basic_model	AC026740.1
0.000454256213336365	basic_model	TAS2R43
0.000463969028682895	basic_model	RYR2
0.00048063130272572	basic_model	FCN2
0.000515359623847482	basic_model	AL445989.1
0.000578698169813065	basic_model	OR1F1
0.000580208695419123	basic_model	BRINP3
0.000601144825228312	basic_model	TCHHL1
0.000706887633107554	basic_model	DCD
0.00075258217215083	basic_model	MROH2B
0.000760794117574998	basic_model	CR2
0.000825685153623229	basic_model	C17orf77
0.000871373708739763	basic_model	CIB3
0.000967668896299035	basic_model	CTNNB1
0.000995293014350622	basic_model	SCAND3
0.00100426196839207	basic_model	DNAH5
0.00102635084459627	basic_model	ZNF729
0.0010318724094298	basic_model	NLRP9
0.00104281607260992	basic_model	NLRP11
0.00114124482723382	basic_model	TPRXL
0.00115532129442494	basic_model	HLA-B
0.00121697936113473	basic_model	TPTE
0.00125559971706217	basic_model	IL10
0.001408525831078	basic_model	DEFB114
0.00141120179486858	basic_model	PKHD1L1
0.00143557647417338	basic_model	MARCO
0.00151883381242866	basic_model	GKN2
0.00155937785955865	basic_model	OR5D18
0.0016492237549376	basic_model	GLP2R
0.00167082684787077	basic_model	STK31
0.00167550124226944	basic_model	HNRNPCL1
0.00177937058270985	basic_model	NDUFV2
0.00193959614923134	basic_model	IL36B
0.00199024249227828	basic_model	TPSD1
0.00202316488870435	basic_model	OR4X2
0.00203007591824752	basic_model	GPR158
0.00205688763434634	basic_model	TEX12
0.00220864255478633	basic_model	CDH12
0.00221692000747723	basic_model	ADAM7
0.0022788799808122	basic_model	TGM4
0.00228651367125126	basic_model	MARCH10
0.00228715017917039	basic_model	AMER3
0.00233867052136648	basic_model	NPAS4
0.00235927423636237	basic_model	OR2L3
0.00246007809850385	basic_model	KCNJ15
0.00251435060593686	basic_model	TRIM77
0.0025242553685448	basic_model	EGFLAM
0.00254798700282547	basic_model	AKT1
0.00262219936514113	basic_model	KRTAP4-7
0.00272511285191764	basic_model	DHRS7C
0.0028118497436057	basic_model	AMPD1
0.00293824899358674	basic_model	SLC38A1
0.00295093940956039	basic_model	OR2J2
0.00296074374587598	basic_model	KRTAP19-5
0.00298063849258147	basic_model	GPRC6A
0.00302720333555562	basic_model	C12orf36
0.00319101453088421	basic_model	OR2T4
0.00350196856444045	basic_model	CNTNAP5
0.00351246684326783	basic_model	KRTAP9-2
0.00353186945722952	basic_model	GABRA2
0.00368520387408824	basic_model	CTSG
0.00368653320898518	basic_model	NLRP2
0.00373407481863355	basic_model	SLC30A8
0.00376398622764534	basic_model	AL596220.1
0.00398586427775241	basic_model	PIEZO2
0.00399310893248045	basic_model	ADIG
0.00399663988305514	basic_model	AP001468.1
0.00420000366760441	basic_model	OR5H15
0.00424591689600057	basic_model	ABCB5
0.00427940964785992	basic_model	CATSPERD
0.00430556397658607	basic_model	OR2A5
0.00460184914013799	basic_model	PI3
0.00475578337525862	basic_model	OR4P4
0.00491496985138691	basic_model	UGT2B10
0.00492151589670868	basic_model	VAV1
0.00501910445065177	basic_model	ZNF716
0.00502030020186459	basic_model	CTB-78H18.1
0.00515293168253948	basic_model	PSG6
0.00554282322463946	basic_model	AL160286.1
0.00581101799537956	basic_model	TRPC4
0.00582854639896759	basic_model	PCDHA7
0.00592906476818803	basic_model	LOXHD1
0.00597046983533604	basic_model	PRKCB
0.00598881995695526	basic_model	CBFB
0.00607680328346761	basic_model	OR6F1
0.00609061406944804	basic_model	POU5F1B
0.00630724603420805	basic_model	GK2
0.00634258633130211	basic_model	PABPC1
0.00674972243421009	basic_model	FGF6
0.00697252402308538	basic_model	OR8H1
0.00699419092169466	basic_model	OR56B3P
0.00702371344193793	basic_model	DCAF4L2
0.00708026768138647	basic_model	OR5AK2
0.0071587348641348	basic_model	SLC35G3
0.00729461380575947	basic_model	TP63
0.00741360008775811	basic_model	RP11-683L23.1
0.00774032250030254	basic_model	CYP1A2
0.00778978568990369	basic_model	DCDC2C
0.00786524116389775	basic_model	LRRC7
0.00787957488739167	basic_model	ACTC1
0.00790360708533	basic_model	CRB1
0.00792517244992275	basic_model	SIGLECL1
0.00796155080544342	basic_model	DCAF4L1
0.00806516328791858	basic_model	SLC22A16
0.00831487495305875	basic_model	LGSN
0.00832829704363823	basic_model	SLC9C2
0.00833804448734187	basic_model	DAW1
0.00852098521773506	basic_model	LY96
0.00858455560946302	basic_model	CNTN5
0.0087898113664347	basic_model	TAS2R60
0.00887519332132592	basic_model	AL645608.2
0.0089838196710478	basic_model	C8B
0.00900945153838131	basic_model	C1orf127
0.00917850088310809	basic_model	ACVR1B
0.00917926260297605	basic_model	BCHE
0.00918729225430147	basic_model	PPP6C
0.00929733823617083	basic_model	TRAT1
0.00955600488108256	basic_model	FAM65C
0.00956541791733318	basic_model	EGFR
0.00956733207139573	basic_model	OPRL1
0.00967421264299981	basic_model	NANOGNB
0.00970643928271115	basic_model	SCN10A
0.0102527545580438	basic_model	NT5DC4
0.0106377040744684	basic_model	OR6A2
0.0106502620918228	basic_model	OR4C3
0.0107354923902481	basic_model	ZNF727
0.0107497596593507	basic_model	ANKRD45
0.0108203619902875	basic_model	AXDND1
0.0108675385539281	basic_model	OR2G6
0.0108898402946202	basic_model	PSG5
0.0109122941467074	basic_model	IL37
0.0110346579986171	basic_model	FAM196B
0.0111432038818646	basic_model	ADAMDEC1
0.0111961659790991	basic_model	APLNR
0.0113176313504482	basic_model	OR6C75
0.0114893112699243	basic_model	LCT
0.0117017120710703	basic_model	OR4D2
0.0118468118015216	basic_model	SLC15A2
0.0119122422328875	basic_model	C12orf55
0.0119186215511892	basic_model	IL10RB
0.0119367239734235	basic_model	OR4C46
0.0119464027457003	basic_model	ZNF705A
0.0127727971163729	basic_model	PZP
0.0128629409241362	basic_model	TMEM78
0.0129629843372223	basic_model	FAM186A
0.0129792389458425	basic_model	ARFGAP1
0.0130462337669567	basic_model	GPC5
0.0131465380685955	basic_model	UGT1A4
0.0132987027663393	basic_model	OR8U1
0.0135054416495279	basic_model	SSFA2
0.0135109456411254	basic_model	DUSP27
0.0135519094096611	basic_model	OR2AP1
0.0135628369160849	basic_model	TAS2R19
0.01364920609168	basic_model	PRR21
0.0141312916878559	basic_model	UGT1A7
0.0142230194790734	basic_model	CACNA1G
0.0143118411157638	basic_model	PCDH18
0.0143314619765513	basic_model	FUT9
0.0144799569624194	basic_model	TNFSF8
0.0146139715858684	basic_model	AGBL3
0.0147824573883149	basic_model	OR4A16
0.0148309844456444	basic_model	CALML5
0.0148690485711444	basic_model	RP11-113D6.10
0.0150602860183095	basic_model	OR6C1
0.0153435568333238	basic_model	OR52E4
0.0154136150324884	basic_model	VSTM1
0.0154969129850856	basic_model	RP11-89K11.1
0.0155012524850883	basic_model	OR5M11
0.0155661222647407	basic_model	GPR141
0.0156058796197189	basic_model	ZNF597
0.0157712935503776	basic_model	BCL2L11
0.0160437258769603	basic_model	NLRP3
0.0163170663578413	basic_model	KRTAP19-7
0.0163182522128235	basic_model	ULBP1
0.0163541268718332	basic_model	LRRIQ3
0.0164967192885852	basic_model	USP6
0.0166057353873606	basic_model	CDH7
0.0166521204864239	basic_model	WBSCR17
0.0167101176506276	basic_model	AC009403.2
0.0167959354784424	basic_model	FAM71F1
0.0170454222738913	basic_model	NLRP8
0.0175875811538855	basic_model	RP11-1220K2.2
0.0176626289789477	basic_model	HGF
0.0177648500719722	basic_model	TAS2R30
0.01787671785473	basic_model	NEK5
0.017897853788097	basic_model	ZNF300
0.0181066089380178	basic_model	AARD
0.0181339223960067	basic_model	EMR1
0.0182323146443081	basic_model	NEUROD4
0.0182682342973822	basic_model	C14orf177
0.0182811953494924	basic_model	ANKRD35
0.0183878546677575	basic_model	TEKT3
0.0186653337750613	basic_model	SERPINB11
0.0194501707796043	basic_model	COL6A3
0.0195678902581326	basic_model	PPP1R9A
0.0196167322858178	basic_model	KRTAP1-3
0.0197883999345726	basic_model	KRTAP3-3
0.0198556337657693	basic_model	NOS1
0.0199689295040231	basic_model	RFPL4AL1
0.0202875040068521	basic_model	RP11-723O4.6
0.0204069366339354	basic_model	GALNT6
0.0208006494610604	basic_model	HLA-DQB1
0.0208284211401429	basic_model	COL21A1
0.0211971244176211	basic_model	DSG4
0.021213271360948	basic_model	PTPN11
0.0212512808618413	basic_model	NLRP7
0.0213370180987234	basic_model	KIR3DX1
0.0213971047698455	basic_model	FAM177B
0.0214216145537868	basic_model	CD300A
0.021480514254387	basic_model	OR2Z1
0.0218755056599265	basic_model	KMT2D
0.0219430490716528	basic_model	F2RL1
0.0221294475035454	basic_model	KCNH5
0.0224292431562134	basic_model	KLF17
0.0224980427248512	basic_model	OR52N4
0.0227574513215647	basic_model	IQCF3
0.0228660726541234	basic_model	TRIM51
0.0233285094206623	basic_model	ADIRF
0.0235923942360883	basic_model	CDH9
0.0236732402997737	basic_model	ACOT4
0.0236995768198497	basic_model	MS4A4E
0.0240209166727758	basic_model	UQCRH
0.0241600424238135	basic_model	LTBP2
0.0242913042787302	basic_model	ACOX3
0.0243919379950013	basic_model	DNAH7
0.024541081791234	basic_model	TCTE1
0.024587202342257	basic_model	SOCS4
0.0246124832972227	basic_model	ANKRD62
0.024630720463309	basic_model	WFDC10A
0.0246927255026124	basic_model	ZNF821
0.0250678263161919	basic_model	FCRL6
0.0250766600221406	basic_model	TPSB2
0.0251971273284048	basic_model	RAC1
0.0253234725627096	basic_model	S100A9
0.0256233267325007	basic_model	WASH4P
0.0256318803844177	basic_model	CORO2A
0.0257285080786656	basic_model	GJC1
0.0262063197740975	basic_model	RP11-477N12.3
0.0262914412475361	basic_model	UGT1A9
0.0263723781312237	basic_model	ZDBF2
0.0264498446542771	basic_model	CRYGC
0.0265783141588771	basic_model	HLA-DQA2
0.0266284519198131	basic_model	ZNF812
0.026811844619164	basic_model	PDE1A
0.0273382079319088	basic_model	LAMA1
0.0275722853758421	basic_model	OR5W2
0.0277200569834387	basic_model	ATP6V1G2
0.02782463840022	basic_model	VHL
0.0278719090335927	basic_model	MYH2
0.0280064014213344	basic_model	C4BPA
0.0281525519290871	basic_model	GSTA1
0.0283812041800738	basic_model	CLLU1OS
0.0284329410410395	basic_model	BEST3
0.0287551782856108	basic_model	MAEL
0.0288507394170641	basic_model	DSG1
0.0296452812196716	basic_model	BRDT
0.0299234054145276	basic_model	UGT1A3
0.0301102882587787	basic_model	THEMIS
0.030133640917865	basic_model	S100A14
0.0302640367068651	basic_model	SPAM1
0.0306105305276881	basic_model	LRRC43
0.0306965544568111	basic_model	SFTPA1
0.0307673207564753	basic_model	C6
0.0308027887461405	basic_model	SRGAP1
0.0308124177124389	basic_model	TCF23
0.0308130107412227	basic_model	CYP2E1
0.0309246828863841	basic_model	ANKUB1
0.0310791116025887	basic_model	KCNA10
0.031254327004844	basic_model	CCL7
0.0313099205533477	basic_model	TNP2
0.0314470960585917	basic_model	CLEC4D
0.0320237190773359	basic_model	ZNF101
0.0320890285737803	basic_model	OR5T3
0.0324777637447444	basic_model	NCR1
0.0324958364276006	basic_model	ANP32D
0.0326092367068978	basic_model	CDKN1B
0.0327233571201975	basic_model	FAM209B
0.0328007003401351	basic_model	IRGC
0.0328781998675326	basic_model	AC109583.1
0.0328961520456625	basic_model	RP11-830F9.6
0.0331658715988002	basic_model	CYP4B1
0.0332735859419218	basic_model	RTL1
0.0335412341052501	basic_model	PDYN
0.0343284633332014	basic_model	MDP1
0.0343660230825348	basic_model	PRR23B
0.0345050358471026	basic_model	DDR2
0.0345050399226855	basic_model	BARX2
0.0347701475371962	basic_model	KIAA1644
0.0350200104520972	basic_model	HEPACAM2
0.0350808110716079	basic_model	GLYAT
0.0352472307952375	basic_model	OR7D2
0.0358350779291495	basic_model	PTPRB
0.0358556991453031	basic_model	TDRD15
0.0360936804708289	basic_model	RP11-167N24.6
0.0368219690385088	basic_model	OR4M2
0.0368783521635169	basic_model	EDEM2
0.0369854531142691	basic_model	RP11-738G5.2
0.0370287125687465	basic_model	GXYLT1
0.0371236304648415	basic_model	IL1B
0.0374321550414004	basic_model	GDF5
0.037603862798207	basic_model	ALLC
0.0376586714048565	basic_model	HDAC9
0.0378609681630364	basic_model	CYP2C19
0.0380027122604433	basic_model	OR5J2
0.0381772800405048	basic_model	AC018867.1
0.0383509785780346	basic_model	TEX30
0.0386675464045838	basic_model	GML
0.0393212805555471	basic_model	GSTA5
0.0394585642004346	basic_model	NPSR1
0.0395190492122651	basic_model	MTNR1B
0.0395679151236026	basic_model	SLC9B1
0.0397305467177598	basic_model	EEF1A1
0.0397632841798378	basic_model	NKG2-E
0.0399550760299964	basic_model	AC026703.1
0.0402036763936844	basic_model	C13orf45
0.0405397140184884	basic_model	PRODH2
0.0406085246882755	basic_model	TAF1L
0.0407148405824235	basic_model	AFP
0.0409021685833537	basic_model	CPZ
0.0410490602717853	basic_model	DNAH10
0.041082383201675	basic_model	NPAP1
0.0411030558101235	basic_model	RP1
0.0411973943109925	basic_model	REG3A
0.0416883974475989	basic_model	CDH11
0.0418884748560483	basic_model	HARBI1
0.0419624114782665	basic_model	MYLK2
0.0420174537612413	basic_model	PSG9
0.042040855224882	basic_model	HRAS
0.0422084023082784	basic_model	AC009041.2
0.0422927028225604	basic_model	SLC8A1
0.0422982343082596	basic_model	OR4D6
0.0423047792301532	basic_model	SEMA3G
0.0423547114734541	basic_model	VAMP8
0.04248198441061	basic_model	EFEMP1
0.042509286602846	basic_model	POLD3
0.0426271911969909	basic_model	CCR2
0.0426501611086565	basic_model	TRPM2
0.0428312678078985	basic_model	CATX-2
0.0428867350416565	basic_model	TCTEX1D1
0.0429048248764723	basic_model	C10orf131
0.0431399917344573	basic_model	OR52J3
0.0432927894812863	basic_model	ROPN1L
0.0434480679551452	basic_model	GYPB
0.043493648299314	basic_model	HAPLN1
0.0435409030397207	basic_model	BNIP3L
0.0442357531382924	basic_model	POTEF
0.0445175408367437	basic_model	A2M
0.0445290709921017	basic_model	AL354898.1
0.0446899113299239	basic_model	SPATS1
0.04470717763783	basic_model	PRKCG
0.0449214693457857	basic_model	FILIP1
0.0450891029649989	basic_model	ADAM28
0.0454325949806867	basic_model	ZNF286A
0.045632669734537	basic_model	OR6C2
0.0459957509676855	basic_model	SLC25A34
0.0461297307830187	basic_model	SIGLEC11
0.0461578604795328	basic_model	NUTM1
0.0467281866160661	basic_model	PRDM9
0.04686081693199	basic_model	COL15A1
0.0474126071602807	basic_model	RP11-712L6.5
0.0475910955726648	basic_model	FETUB
0.0478693351320781	basic_model	OR1L1
0.0479200523466919	basic_model	KNSTRN
0.0479274856900945	basic_model	OR6T1
0.0480489776346736	basic_model	SVEP1
0.0480573431998181	basic_model	RTP2
0.0494876245894814	basic_model	OR5AS1
0.0495384897411133	basic_model	ADARB1
0.0497429676474562	basic_model	WISP1
0.0497895301216269	basic_model	IL1F10
0.0500335051372047	basic_model	AKR1D1
0.0504194390653106	basic_model	CDH18
0.0504706259253133	basic_model	PYGO1
0.0506709445361753	basic_model	OR10J5
0.0507479558808709	basic_model	HMSD
0.0514840796754683	basic_model	GIMAP8
0.0517745426784826	basic_model	CD207
0.0518445841390886	basic_model	NXPH2
0.0519004609901452	basic_model	INHA
0.0520625602817146	basic_model	PSD2
0.0521966193693772	basic_model	FOXR1
0.0523684999050502	basic_model	ZPLD1
0.0524813707119268	basic_model	TOX2
0.0526354985240075	basic_model	SYNGR4
0.0526570190834167	basic_model	RBFOX1
0.0530483388346178	basic_model	LILRA1
0.0531614285674451	basic_model	ZFP3
0.0531674311431724	basic_model	CHST11
0.053189378481651	basic_model	CD33
0.0532914720299937	basic_model	CYP1A1
0.0540645750345743	basic_model	IL1RL1
0.0542332729984461	basic_model	RD3L
0.0542729987240763	basic_model	SDHAF2
0.0547050511764782	basic_model	SORCS1
0.0547414044540313	basic_model	CRYBA4
0.0551532369691974	basic_model	CHGB
0.0552055545965249	basic_model	SAMD9
0.0552309521201055	basic_model	PCDH15
0.0554223098158133	basic_model	OR4K5
0.0555380967986284	basic_model	ZNF283
0.0559167147589155	basic_model	FAM161A
0.0560806295091432	basic_model	SPZ1
0.0562007595954184	basic_model	GP9
0.0562208881207521	basic_model	MSANTD3
0.0563318476543704	basic_model	LMOD3
0.0563537041343017	basic_model	OR5T1
0.056630871503392	basic_model	C1orf100
0.0566630891418579	basic_model	CNIH1
0.056769823646005	basic_model	KRTAP4-8
0.0570952164846643	basic_model	TMEM69
0.0571314924661	basic_model	TAS1R2
0.0574088834284984	basic_model	ZIM3
0.0577931639879791	basic_model	KRT6A
0.0578716255937652	basic_model	PADI3
0.0579327695645865	basic_model	BAD
0.0583109217123458	basic_model	FLNC
0.0591570991968459	basic_model	ODF1
0.0591652702685612	basic_model	TRIML2
0.0592718365164656	basic_model	LCE1F
0.0592847704553519	basic_model	DNAH17
0.0593326034324299	basic_model	ASB17
0.0594037373307908	basic_model	OR2C3
0.0594707471428866	basic_model	USMG5
0.0599165893162328	basic_model	CCBE1
0.060172070905267	basic_model	OR4N2
0.0602965675257803	basic_model	SLC2A3
0.0605697571517211	basic_model	EIF2S3L
0.0607408709131327	basic_model	KRT26
0.0611413450897742	basic_model	GPRIN2
0.0612955890609178	basic_model	OR6P1
0.0618070351502182	basic_model	ABCD2
0.061874127943222	basic_model	SIGLEC8
0.0618814978031929	basic_model	OR4D5
0.0619662363147572	basic_model	CILP
0.062079644667556	basic_model	OR5M3
0.0621115939738192	basic_model	RP11-723G8.2
0.0621845031497486	basic_model	CALN1
0.0622222417682441	basic_model	OR4K1
0.0622780308818952	basic_model	PIK3CG
0.0622997721092069	basic_model	PLVAP
0.0623104848742275	basic_model	PEX5
0.0624182822722055	basic_model	AC003043.1
0.0624460817094121	basic_model	GALNTL5
0.0624622600622396	basic_model	ANGPT4
0.0626173838313234	basic_model	TNR
0.062747416900489	basic_model	OTOS
0.0627798090433994	basic_model	PSCA
0.0629362439570941	basic_model	NPY5R
0.0630861487592802	basic_model	PSG11
0.0632835218971569	basic_model	TENM3
0.0633970204081716	basic_model	LY6K
0.0633980812805043	basic_model	ANP32E
0.0635856772327628	basic_model	ANKRD30A
0.0638648603102038	basic_model	BIK
0.0639919778188911	basic_model	OR1A1
0.0640675890682063	basic_model	AADACL3
0.0644364335063113	basic_model	COL1A2
0.0645508617170721	basic_model	OR4C15
0.0648050439303195	basic_model	EFCAB9
0.0648360556261856	basic_model	RIIAD1
0.0649348722136753	basic_model	SLC39A12
0.064977897085291	basic_model	LNP1
0.0657640397840208	basic_model	KCNB1
0.0658369594865632	basic_model	CATSPER1
0.0664260543813703	basic_model	OR4C12
0.0669079333337459	basic_model	MTRNR2L7
0.0674933690389472	basic_model	FRMPD2
0.0676367516387735	basic_model	C12orf43
0.0677135793563754	basic_model	LILRA6
0.0680393232407439	basic_model	MGC10955
0.0682749133312151	basic_model	EPT1
0.0683910000409045	basic_model	DEFB115
0.0684442095785437	basic_model	CFI
0.0685879740808924	basic_model	TECRL
0.0687653058527349	basic_model	AC005008.2
0.0688628819748886	basic_model	FAM183B
0.0689258329859614	basic_model	EFTUD2
0.0690448587330752	basic_model	KRTAP4-11
0.0690963265802038	basic_model	ACSM2A
0.0691027616245067	basic_model	IL8
0.0692264044769555	basic_model	PRSS33
0.0694030046320954	basic_model	LRRC18
0.0697748155210744	basic_model	PHLDB2
0.0698279603999024	basic_model	ACP5
0.0703632797705192	basic_model	OTOL1
0.0703666150915344	basic_model	PPA1
0.0707405713685195	basic_model	NEFH
0.0713487591001452	basic_model	TNN
0.0713630120107185	basic_model	TIE1
0.0714359978112335	basic_model	HDAC11
0.071585527891884	basic_model	USH2A
0.0716183207948162	basic_model	ADNP
0.0720151590013829	basic_model	TRIML1
0.0723058530937443	basic_model	SPTSSB
0.0723068071570826	basic_model	TAS2R10
0.0723493624641232	basic_model	SLC35G5
0.0723946782778129	basic_model	UGT1A6
0.0724997145597009	basic_model	ZNF728
0.0725767744961724	basic_model	PTH2R
0.0726571532619201	basic_model	C4orf26
0.0727811583995313	basic_model	OR2M3
0.073565163232046	basic_model	TCP11L2
0.0737878488759406	basic_model	AKR1B10
0.0740651974046589	basic_model	GPR156
0.0743326812543014	basic_model	CISD3
0.0745622858739243	basic_model	PCED1B
0.0747701125881106	basic_model	KRTAP10-10
0.0748016186863009	basic_model	UGT1A5
0.074859741877854	basic_model	SLC22A25
0.075180141450301	basic_model	AC013449.1
0.0756032579728336	basic_model	ZNF594
0.0760701645792962	basic_model	IFNA14
0.0761257776309959	basic_model	GRIN3A
0.076167921026677	basic_model	CACNG3
0.0764257231798058	basic_model	KRT82
0.076528494341217	basic_model	CPT1C
0.0766469906930129	basic_model	IGF2BP1
0.0766684679963962	basic_model	KRTAP15-1
0.076884934935373	basic_model	SLC17A5
0.076932547457969	basic_model	C20orf141
0.0769619769186057	basic_model	AVPR1B
0.0769783432426784	basic_model	PAK2
0.0770597842622267	basic_model	PRED58
0.0775180587352321	basic_model	CBFA2T3
0.0777582386626784	basic_model	TBATA
0.0780067906338941	basic_model	CTC-512J12.6
0.0782316586843087	basic_model	OR2T33
0.0787110573969031	basic_model	AMMECR1L
0.0787915793304751	basic_model	OR14A2
0.0788402643342051	basic_model	OR1M1
0.0789081235021542	basic_model	PLCL2
0.079105909570765	basic_model	C6orf118
0.079111599827832	basic_model	SLITRK3
0.0791219258442326	basic_model	RPE65
0.0794963944410814	basic_model	STEAP4
0.0795487440956705	basic_model	ZG16B
0.0797492237129181	basic_model	LCE1B
0.0798585491232219	basic_model	LPL
0.0800413894401635	basic_model	OR11H6
0.0804927281070497	basic_model	CUEDC2
0.0806894871412164	basic_model	SLC22A24
0.080830630554526	basic_model	LPHN3
0.0808907754005184	basic_model	CD163L1
0.0810158753539499	basic_model	OR4N5
0.0811112678998855	basic_model	CDK18
0.081197856996418	basic_model	RFX6
0.0813499538593003	basic_model	MTRNR2L4
0.0814246783443625	basic_model	KDR
0.0817185648964325	basic_model	CDKN2C
0.0820300941735854	basic_model	C16orf45
0.0823316348240652	basic_model	SPINT2
0.0824389420699201	basic_model	KRT9
0.0824452617731439	basic_model	MYPN
0.0826667225372518	basic_model	OR8G5
0.0830101459069128	basic_model	TRIQK
0.0831483559266292	basic_model	TRPS1
0.0831746878297954	basic_model	ASB5
0.0834671293399779	basic_model	KIR3DL1
0.0835453591529821	basic_model	NUGGC
0.0835728091920555	basic_model	MYT1L
0.083743049410033	basic_model	PTPN2
0.0841273729222773	basic_model	RNLS
0.0841788176915803	basic_model	CST9L
0.0846501971745355	basic_model	PCID2
0.0849403063175974	basic_model	WDR87
0.0852419039959616	basic_model	TTC6
0.0854059792772507	basic_model	TMEM132B
0.0854070111408954	basic_model	DEFB136
0.0856244931234206	basic_model	ACTB
0.0857236217815015	basic_model	LRRC3DN
0.0857647410411364	basic_model	BPIFB4
0.0860816181685145	basic_model	CCR5
0.0865271503180041	basic_model	SKAP1
0.0868258114674555	basic_model	CD163
0.0869426007916816	basic_model	NACAD
0.0870628402853014	basic_model	LILRB1
0.0872497965614886	basic_model	PBRM1
0.0874545668230581	basic_model	SERPINB2
0.0875484296057407	basic_model	A2ML1
0.0878270301627743	basic_model	LMO7
0.0879130329980434	basic_model	OR2Y1
0.0882294439894894	basic_model	VWC2L
0.0886794481167845	basic_model	ABHD3
0.0887111441454873	basic_model	CCDC27
0.0891090273301782	basic_model	KRTAP5-2
0.0891201042672319	basic_model	CYLC2
0.0891274250905919	basic_model	OR8S1
0.0895603583214432	basic_model	PIWIL1
0.0896184835835727	basic_model	M1AP
0.0898558218839539	basic_model	C20orf27
0.0900354639646187	basic_model	IRF6
0.0901941412946796	basic_model	GTSF1
0.0902116986398103	basic_model	WNT2
0.0905108303652826	basic_model	AC091801.1
0.0907075238318066	basic_model	HOPX
0.0908151361939498	basic_model	RP11-332O19.5
0.0908264073785362	basic_model	KRTAP5-10
0.0912166962705656	basic_model	SDK2
0.0913179338592579	basic_model	MASP1
0.0913205200426048	basic_model	NWD1
0.0913448029828836	basic_model	DDI1
0.0918089784468717	basic_model	OR5H1
0.0921048434136325	basic_model	NDUFB3
0.0924057738042325	basic_model	POLR2D
0.0925282367442075	basic_model	AC091948.1
0.0926630973771553	basic_model	MEFV
0.093011726515982	basic_model	RPL21
0.0930735657842714	basic_model	NNMT
0.0941337289791049	basic_model	WDR64
0.0941368795270692	basic_model	ASZ1
0.0942100602867365	basic_model	MRPL35
0.0943731274795914	basic_model	CLEC17A
0.0944087864400797	basic_model	C9orf153
0.0944979380473513	basic_model	NSG2
0.0946228942843692	basic_model	MLANA
0.0947315754429954	basic_model	CREBBP
0.0947525497697	basic_model	HSBP1L1
0.0954332128017125	basic_model	LEUTX
0.0958827364353588	basic_model	LMAN2L
0.0961430055410804	basic_model	UBE2R2
0.0963403632270977	basic_model	CCL27
0.0966136419975687	basic_model	ZNF479
0.0968822939553116	basic_model	KRT8
0.0970968396511568	basic_model	LRRC15
0.0979634172832971	basic_model	PIH1
0.098978267024289	basic_model	TES
0.0990342084850853	basic_model	SAMHD1
0.0993777000413272	basic_model	NMUR2
0.099394661708892	basic_model	SF3B1
0.0994982621710095	basic_model	RHOA
0.0997907050226281	basic_model	OR5K4
0.0997924575385451	basic_model	A4GALT
0.100572224712122	basic_model	SELP
0.100597811223816	basic_model	CDKN1A
0.100808428768495	basic_model	TCL1B
0.10084535128948	basic_model	CTB-58E17.5
0.100855738751404	basic_model	SPINT3
0.102009375140113	basic_model	UBXN11
0.102024516212828	basic_model	SPOCK3
0.102048486836726	basic_model	UCHL1
0.102200667551644	basic_model	TDRD10
0.102564745076596	basic_model	FCER1A
0.102774727690111	basic_model	GRPEL2
0.102816442890176	basic_model	CTC-236F12.4
0.103023824572676	basic_model	STK11
0.103106948747092	basic_model	FBN2
0.103330565027367	basic_model	CABS1
0.103369850318861	basic_model	KEAP1
0.103386225492917	basic_model	EPHA5
0.103403151284664	basic_model	AC073657.1
0.103845024532392	basic_model	TAF5
0.103872882654628	basic_model	FAM227B
0.103917459636754	basic_model	EPS8L3
0.103963127065519	basic_model	OR6C76
0.104034617819887	basic_model	PUM1
0.104085604369473	basic_model	OR10H4
0.104088050024459	basic_model	ANGPT1
0.104100818667816	basic_model	LRRC20
0.104154918379671	basic_model	CD86
0.104294072130263	basic_model	SLC12A8
0.104468361136503	basic_model	C1orf172
0.104668851686588	basic_model	CCDC108
0.104765446554105	basic_model	DPCR1
0.104896075655369	basic_model	SMAD4
0.105261759438428	basic_model	IL1A
0.105372186786064	basic_model	RP11-180C1.1
0.10543526958461	basic_model	ZP3
0.105532738287315	basic_model	C8orf34
0.105580986956175	basic_model	C1S
0.105675599483771	basic_model	PCDHA5
0.105713465682927	basic_model	GSTM5
0.105740624661383	basic_model	PATE4
0.1061269098623	basic_model	ZNF625
0.106495015431151	basic_model	MRGPRD
0.106588074654083	basic_model	SPIC
0.106610991310279	basic_model	DNAAF3
0.107170718954531	basic_model	CRYGN
0.107425561314385	basic_model	MCU
0.107674367610925	basic_model	SCGB1D1
0.107791181691784	basic_model	PRAMEF11
0.108073774383043	basic_model	SPIN1
0.10875128390577	basic_model	FAM27A
0.109003328069462	basic_model	ALG8
0.109123135184209	basic_model	AQP7
0.109256567398117	basic_model	KRTAP5-4
0.109382405688905	basic_model	DNAL1
0.109509286928644	basic_model	CARD18
0.109572203143366	basic_model	RALB
0.109645086731353	basic_model	AC016722.1
0.10968984882467	basic_model	ENPP6
0.109725824632494	basic_model	TXNL4B
0.110005918331763	basic_model	OR1L8
0.110246649854849	basic_model	AC073343.1
0.110377492905714	basic_model	C1orf54
0.110986764953748	basic_model	USE1
0.111831410260674	basic_model	RNF40
0.112036022444317	basic_model	CHRM2
0.112068347634922	basic_model	CYP2C18
0.112071560193202	basic_model	SYT17
0.112127631496436	basic_model	GCLM
0.112622190289685	basic_model	GJA9
0.112742792449783	basic_model	RP11-122A3.2
0.112762286948899	basic_model	CASR
0.113056191326931	basic_model	PLIN3
0.113106662908347	basic_model	BEND6
0.113502738144824	basic_model	TOMM6
0.11361056122101	basic_model	SLC38A4
0.114961615496517	basic_model	GRM8
0.115688903457172	basic_model	RFPL4A
0.115708135683327	basic_model	SYT16
0.115788133695296	basic_model	RPL8
0.116003005520469	basic_model	GABRA1
0.116021317721352	basic_model	PTPN22
0.116360326658176	basic_model	LOH12CR2
0.11657329884234	basic_model	DSCAM
0.117323270150254	basic_model	SLCO1B3
0.117753084174144	basic_model	SLFN12L
0.117874898630233	basic_model	HDC
0.117986296558665	basic_model	LRRC55
0.118266823404533	basic_model	HLTF
0.118501180139033	basic_model	LELP1
0.118699847410149	basic_model	IFNL3
0.118803206048455	basic_model	KRTAP12-4
0.118821341049422	basic_model	UGT1A1
0.11894461307766	basic_model	CDYL
0.119163249790114	basic_model	CCL21
0.119294088732997	basic_model	CMTM5
0.119475933768625	basic_model	PROL1
0.119644761512057	basic_model	HLA-DRB5
0.119719719225739	basic_model	SFXN2
0.11977853583602	basic_model	CRIPAK
0.119829102166113	basic_model	SCN3A
0.119882002458839	basic_model	FPR3
0.120105374588212	basic_model	IMPACT
0.120754695216401	basic_model	ANKRD30BL
0.12081181211602	basic_model	TAAR6
0.121060716364659	basic_model	DCLRE1C
0.121221420035208	basic_model	CEP19
0.121420598061703	basic_model	CFTR
0.121437964721269	basic_model	PCDHA8
0.121767975733874	basic_model	B3GALT2
0.121838656546421	basic_model	ACTL9
0.121976447772411	basic_model	CCDC54
0.122272144053597	basic_model	CD28
0.122439918601871	basic_model	MRPL51
0.122454102990405	basic_model	RFPL3S
0.122595147956689	basic_model	OLAH
0.122604661068432	basic_model	C1orf168
0.122835158607597	basic_model	MXD4
0.122852331433384	basic_model	KIAA0125
0.12306102099684	basic_model	AC110084.1
0.123236336832196	basic_model	RP5-850E9.3
0.123307471211334	basic_model	CHP1
0.123397973995744	basic_model	CASP14
0.123566178713889	basic_model	CSF3R
0.124694345214637	basic_model	ZNF20
0.124789914330041	basic_model	VARS
0.12487290484767	basic_model	AL646016.1
0.125794180277375	basic_model	OR1G1
0.125880559456647	basic_model	CYTH4
0.125927980179548	basic_model	RNASE11
0.126001009426597	basic_model	IL18R1
0.12601544706982	basic_model	PCDHA11
0.126033265112003	basic_model	NID2
0.126136785992374	basic_model	KCND2
0.126170589845189	basic_model	SDS
0.126396642584928	basic_model	OR2M2
0.126411355930069	basic_model	GKN1
0.126425528064793	basic_model	C14orf132
0.126552725090385	basic_model	PAPPA2
0.126798701450877	basic_model	CNBD1
0.127344496855472	basic_model	TAS2R39
0.127368126067319	basic_model	AL139080.1
0.127464649930731	basic_model	CST11
0.127628296080868	basic_model	RGS6
0.127726131939333	basic_model	MAP2K7
0.127956088724793	basic_model	BPIFB1
0.128021289449079	basic_model	AC007461.1
0.128170088418906	basic_model	AL358333.1
0.12828627556084	basic_model	RNASE11
0.128320170880666	basic_model	C2
0.128386678665511	basic_model	OR8D4
0.128611589669117	basic_model	LY6G6C
0.128732686088058	basic_model	CDK2AP1
0.128753838283576	basic_model	FAM131B
0.128963574268419	basic_model	MMP19
0.129064193870915	basic_model	STEAP1B
0.129118773445516	basic_model	TMEM255B
0.129154554634527	basic_model	CHCHD10
0.129388080803346	basic_model	SUN3
0.129634736959192	basic_model	TNFSF10
0.129727920104085	basic_model	CD9
0.129964525762845	basic_model	SNAP91
0.130143909104964	basic_model	FOLR1
0.130147185531545	basic_model	SERPING1
0.130180964635466	basic_model	GOLGA1
0.130244464773629	basic_model	FRG1
0.130606733254274	basic_model	OR10A4
0.131012354841494	basic_model	ZNF683
0.131022187695166	basic_model	MRPL11
0.131215900686684	basic_model	OR6K2
0.131791473504833	basic_model	TMEM30C
0.132054919908896	basic_model	RGS22
0.132362334396606	basic_model	TEX35
0.132487180676542	basic_model	CCDC173
0.132546636302728	basic_model	PILRB
0.132684129161803	basic_model	FCRL1
0.13295556055574	basic_model	OR2T2
0.133545692791694	basic_model	SMR3B
0.133997123342219	basic_model	FAM83B
0.134265927255377	basic_model	CASQ2
0.134269234156694	basic_model	AC022498.1
0.134521095640393	basic_model	GPR132
0.134622122049853	basic_model	GPR1
0.134662818921758	basic_model	SCN7A
0.135428702071285	basic_model	KRT79
0.135659113712819	basic_model	PRNT
0.135722913640315	basic_model	TMEM212
0.135802742876521	basic_model	LCN12
0.1359016676825	basic_model	NEDD8-MDP1
0.135916897213831	basic_model	AOC3
0.135990307746327	basic_model	TEX29
0.136022959137068	basic_model	CLK1
0.136185837749484	basic_model	LIPF
0.136239235331163	basic_model	RFPL2
0.136615790051191	basic_model	TGM2
0.136645705955508	basic_model	MRPS18A
0.136736847131385	basic_model	PRAMEF4
0.137140966568891	basic_model	MED18
0.137221453238343	basic_model	MROH2A
0.137259435154542	basic_model	CD70
0.137482275358656	basic_model	SLFN14
0.137519543807129	basic_model	AC096677.1
0.137540430857039	basic_model	AL627171.1
0.137731172765988	basic_model	DPYD
0.137881674909768	basic_model	RP11-861L17.3
0.137902332391054	basic_model	CTSS
0.138219066285858	basic_model	CARD17
0.138296776920048	basic_model	LITAF
0.138318382023356	basic_model	AL590714.1
0.138510004131556	basic_model	GPRC5A
0.138644751770548	basic_model	CLCN1
0.138678250854113	basic_model	RP11-542P2.1
0.138846784109597	basic_model	LILRA5
0.138879799171078	basic_model	INMT
0.138938839180941	basic_model	SLCO1B7
0.13897225597843	basic_model	TSPAN8
0.13929192249861	basic_model	PXMP4
0.139315668601378	basic_model	ANKRD30B
0.139430311085448	basic_model	C8orf4
0.13946266580194	basic_model	CTC-786C10.1
0.139667165450543	basic_model	CD36
0.13967507710478	basic_model	FKBP1C
0.139917179472896	basic_model	ST8SIA3
0.140009928290366	basic_model	AL137002.1
0.140334967963823	basic_model	VEGFC
0.140515656088736	basic_model	CLEC4C
0.140631317894971	basic_model	ECE2
0.140840779310476	basic_model	COL6A6
0.141237354180751	basic_model	PLEK
0.141441837339819	basic_model	KRT25
0.142011575325289	basic_model	FBXO27
0.142440588823976	basic_model	SLC35E4
0.142859059506485	basic_model	HEG1
0.142874818046772	basic_model	PCDHA4
0.143103840676317	basic_model	SPACA4
0.143289859211515	basic_model	TMEM202
0.143971763450529	basic_model	RNASE10
0.144041616910702	basic_model	SMAD2
0.144266398474606	basic_model	OR4D11
0.144266437684019	basic_model	CTCFL
0.144279656663156	basic_model	ENPP7
0.144451736164057	basic_model	SERPINB10
0.144781461781338	basic_model	DENND2C
0.144802452830631	basic_model	HDDC2
0.144979107605202	basic_model	NTRK3
0.144989675503595	basic_model	TNFRSF8
0.145162139483053	basic_model	RWDD2B
0.145871502375115	basic_model	LIFR
0.146235196558952	basic_model	RNF212
0.146301294353415	basic_model	GFRAL
0.146478163903115	basic_model	RIMS2
0.146527190922471	basic_model	CEACAM21
0.146613055650088	basic_model	WDR93
0.146621717562377	basic_model	S100A7
0.147003422153409	basic_model	C9orf57
0.147182345666948	basic_model	FPR1
0.147282392434581	basic_model	PIANP
0.147387465035223	basic_model	ADAM21
0.147472697994673	basic_model	TMEM225
0.147613566283831	basic_model	MSMP
0.147668305497908	basic_model	C16orf3
0.147816934626217	basic_model	RP11-514O12.4
0.147884482458824	basic_model	ANTXRL
0.148101158697894	basic_model	AIM1
0.148200802482046	basic_model	LRFN2
0.148291179577279	basic_model	EYS
0.148673471926987	basic_model	TNFRSF9
0.14871528148082	basic_model	MECR
0.149297959278512	basic_model	SCN1A
0.149379860905406	basic_model	RD3
0.149406459289582	basic_model	OR51V1
0.149527918542162	basic_model	ELFN2
0.1496553028943	basic_model	ITGB3BP
0.149710206764149	basic_model	CYP26B1
0.149908751764575	basic_model	ZNF286B
0.150227663567222	basic_model	CLDN6
0.150255136037439	basic_model	RP11-770J1.5
0.150304934268892	basic_model	OR51A4
0.150415254047961	basic_model	FAM19A1
0.150719360535319	basic_model	AC020629.1
0.150813493649037	basic_model	CBS
0.150921814507657	basic_model	ICA1
0.150987921571069	basic_model	AC120194.1
0.151566511383824	basic_model	OR7G1
0.151624756831839	basic_model	RP11-1102P16.1
0.151656168828184	basic_model	ERVW-1
0.152019511616511	basic_model	SERPINB4
0.152165474559723	basic_model	HEMGN
0.152310772175224	basic_model	ITLN1
0.152490915671239	basic_model	OR10R2
0.152621555839253	basic_model	CYP7B1
0.153328633772564	basic_model	SPATA32
0.153537435208434	basic_model	FLJ30594
0.153581479644555	basic_model	MEP1A
0.153673773469629	basic_model	OCLM
0.153874175248178	basic_model	L47234.1
0.153904500054345	basic_model	MAP2K3
0.153934378428911	basic_model	F5
0.154253900409421	basic_model	OR2S2
0.154539744806389	basic_model	VGLL4
0.15479179331783	basic_model	IL31
0.155014812687402	basic_model	OR2M4
0.155092101546983	basic_model	SDIM1
0.155213997807006	basic_model	C3orf18
0.155242952786153	basic_model	NPBWR2
0.155294035972872	basic_model	SYNGR1
0.155569771830149	basic_model	RP11-404L6.2
0.155607392535341	basic_model	PCDHB16
0.155737126936626	basic_model	SLC1A6
0.155745913496372	basic_model	AC012493.2
0.155861332121386	basic_model	KRTAP4-3
0.156354444679579	basic_model	C5orf17
0.156655905393056	basic_model	FAM64A
0.156803019916469	basic_model	LCE2C
0.157417482816789	basic_model	HORMAD2
0.157590811742153	basic_model	CCDC87
0.157602986566756	basic_model	TEX15
0.157910165731167	basic_model	POFUT2
0.15812428302804	basic_model	RP4-576H24.4
0.158182763377523	basic_model	AC092850.1
0.158247065616119	basic_model	OR10K2
0.158426192165327	basic_model	MMP9
0.158598961896865	basic_model	RP11-315O6.2
0.158731157832679	basic_model	EFCAB13
0.158822299081018	basic_model	OR5H14
0.15956598538414	basic_model	UNC79
0.15960005368217	basic_model	KLRC3
0.159692271712027	basic_model	VIP
0.160141858427205	basic_model	NOP10
0.160280006587676	basic_model	C17orf66
0.160386673128471	basic_model	COMMD8
0.160525265298122	basic_model	OR4C13
0.160557424486039	basic_model	C12orf65
0.160616160658051	basic_model	MAP1LC3C
0.160709349353172	basic_model	NLRP13
0.161067180180082	basic_model	SLC14A1
0.161268473179197	basic_model	PLA2G12B
0.161483814657741	basic_model	MT1A
0.161528654063474	basic_model	AVPI1
0.161541002413257	basic_model	OR4C16
0.161557506087655	basic_model	DCLK3
0.161630457617314	basic_model	SIGLEC6
0.161693428922324	basic_model	SPRR2F
0.161741796179452	basic_model	HVCN1
0.162309786571964	basic_model	NR1H4
0.162453056683533	basic_model	OR2W1
0.162482575840576	basic_model	HIGD2B
0.162593603978093	basic_model	ZFAND5
0.162715809883975	basic_model	CACFD1
0.162841517309091	basic_model	GPR87
0.162907257098658	basic_model	OR10AG1
0.163177977162997	basic_model	DPPA3
0.163395973025701	basic_model	PGAP3
0.163643431802434	basic_model	PARP6
0.163730084215287	basic_model	S100A7L2
0.163849378746144	basic_model	APOBEC3C
0.163926840256976	basic_model	MSRB1
0.163992728335475	basic_model	HCAR3
0.16407887463803	basic_model	C5orf24
0.164465331916098	basic_model	OR11H4
0.164514406783732	basic_model	SCGB1D4
0.16459519491855	basic_model	CNN1
0.164731048561907	basic_model	DPPA2
0.16485804221983	basic_model	TCTA
0.164899996242741	basic_model	MMP11
0.165005798380933	basic_model	IQCF6
0.165071244136051	basic_model	CNTNAP2
0.165193792022357	basic_model	KCNK18
0.165222502462215	basic_model	TRIM49B
0.165300331215014	basic_model	CNTN3
0.165686282444188	basic_model	ZFP42
0.165843342751825	basic_model	AQP3
0.165893272368868	basic_model	S100A11
0.165909698649164	basic_model	RAD21L1
0.165912491873029	basic_model	NPHS1
0.166213464140092	basic_model	TM4SF19
0.16629147961393	basic_model	ZNF501
0.166487537073047	basic_model	AC069547.1
0.166523155124284	basic_model	MEIG1
0.166528161274595	basic_model	ELAVL2
0.166554322756391	basic_model	EPHA6
0.168078343037713	basic_model	CD48
0.168317132747795	basic_model	ALPI
0.168370897113494	basic_model	FAS
0.168597675413523	basic_model	TMEM222
0.168669015030595	basic_model	RP11-758M4.1
0.168687851742524	basic_model	REG1A
0.168976015247752	basic_model	LIPN
0.169079156529682	basic_model	GNGT2
0.169640675266533	basic_model	KRT7
0.169755230503563	basic_model	IGF1
0.170130946883915	basic_model	LRRC32
0.170314355839094	basic_model	GOLGA7B
0.170558729829179	basic_model	DNAJC5G
0.170575659260449	basic_model	ZCCHC17
0.170601334944067	basic_model	AMN1
0.170607211053587	basic_model	SLC17A3
0.170628103302833	basic_model	CYSLTR2
0.170730854553077	basic_model	SVOPL
0.171488019396037	basic_model	RNASE3
0.172102735371605	basic_model	TSHB
0.172233391602445	basic_model	GALT
0.172266984061319	basic_model	SIGLEC7
0.172585034617814	basic_model	MYBPC2
0.172607722996845	basic_model	TRIT1
0.17271489462704	basic_model	AC012215.1
0.17303112438325	basic_model	C6orf58
0.173337027926621	basic_model	IL17A
0.173730116112386	basic_model	VSTM2A
0.173769985779919	basic_model	SCG3
0.173852170332564	basic_model	OR9G4
0.173878691075367	basic_model	OR6C65
0.174062535605243	basic_model	STATH
0.174065255538452	basic_model	MYL6
0.17422216066277	basic_model	WDR66
0.174235692153912	basic_model	PLCXD3
0.174299847829699	basic_model	AP000295.9
0.174399199230056	basic_model	COL5A1
0.174433512214676	basic_model	SLC22A8
0.174658024260603	basic_model	C5orf60
0.174748769184856	basic_model	CCNE1
0.17476628130444	basic_model	KRTAP17-1
0.175027243264225	basic_model	OR2AJ1
0.175117069859713	basic_model	AC132216.1
0.175370070957792	basic_model	RP11-867G23.8
0.175711078247763	basic_model	NPVF
0.175740012548289	basic_model	NAA11
0.175941389020635	basic_model	THEM5
0.176502844836239	basic_model	CDH5
0.17664743496775	basic_model	CWH43
0.177385013762003	basic_model	AL079342.1
0.177636234293036	basic_model	ERLIN1
0.17764400398866	basic_model	CD3D
0.177680372295424	basic_model	OR6K3
0.177744842040821	basic_model	ADIPOQ
0.178262790177115	basic_model	CD53
0.178349785641438	basic_model	SULF1
0.178505637377716	basic_model	LACRT
0.17870720274276	basic_model	ARMC7
0.1787269517664	basic_model	ARHGAP20
0.178788364836695	basic_model	MAP3K19
0.179117545190536	basic_model	MME
0.179160600367784	basic_model	PTPRCAP
0.17926510168893	basic_model	GJD2
0.179393389230983	basic_model	MUC8
0.179626621467192	basic_model	GNGT1
0.179685497677566	basic_model	AL645922.1
0.180299088351734	basic_model	NLRP12
0.180340858072366	basic_model	RP11-45H22.3
0.180394230992492	basic_model	MROH8
0.180713761134289	basic_model	GLRB
0.180862036251303	basic_model	ITGB2
0.180876646895139	basic_model	MIA2
0.180883709989636	basic_model	C7orf69
0.181128509986589	basic_model	APCS
0.181167294826609	basic_model	LILRB2
0.18169936866631	basic_model	PFDN4
0.182109442478793	basic_model	CGB7
0.182183580574709	basic_model	RPAP1
0.182295680907265	basic_model	TPSAB1
0.182297618544158	basic_model	ANP32B
0.182397284157163	basic_model	C9orf43
0.182501268395175	basic_model	FKBP7
0.182646672412338	basic_model	OR2AE1
0.183352284320204	basic_model	AC051642.1
0.183380558588922	basic_model	C16orf78
0.183454979248811	basic_model	S100A2
0.183705428710778	basic_model	CLIP4
0.183715866629252	basic_model	OR2G3
0.184646690080647	basic_model	ZNF804B
0.184661751900799	basic_model	ZNF16
0.18468898944665	basic_model	CSGALNACT1
0.184877770107791	basic_model	AZU1
0.18487784205863	basic_model	EIF2B3
0.184881804166228	basic_model	NFYA
0.184964125666628	basic_model	TRIM29
0.185479687162217	basic_model	OR4K17
0.185525234845261	basic_model	OR2AK2
0.185639341121706	basic_model	C20orf62
0.185660669353611	basic_model	CABP4
0.185713054129459	basic_model	ADAM2
0.186166243767235	basic_model	LSMEM2
0.186231837424736	basic_model	KIAA1257
0.186307617201752	basic_model	CUZD1
0.186419865581093	basic_model	OR5L2
0.186632362451947	basic_model	ASTN1
0.186850939689435	basic_model	AC096644.1
0.186939061704532	basic_model	TVP23B
0.187019970593755	basic_model	SLC35G2
0.187089092777551	basic_model	GPX6
0.187148005070024	basic_model	DDHD2
0.187151939942971	basic_model	AC078925.1
0.187218598986989	basic_model	OR8K3
0.187231286225689	basic_model	AC022431.2
0.187454854832817	basic_model	RNF115
0.187576614517279	basic_model	FAM27E2
0.188087917421946	basic_model	PCDHA6
0.188138581140316	basic_model	LCA5L
0.188635478197105	basic_model	ARRDC3
0.18866766046688	basic_model	SPINK6
0.18880350911771	basic_model	PON3
0.189267702364471	basic_model	OR51E2
0.189486222934089	basic_model	PDE6H
0.189572762663261	basic_model	KLHL1
0.18967863951364	basic_model	C3orf56
0.189690838720748	basic_model	SLC13A2
0.189845925142287	basic_model	PLA2G4C
0.189860313419003	basic_model	RP11-62N21.1
0.19004925625773	basic_model	AC009892.10
0.190145550556187	basic_model	FAM57B
0.19093649931347	basic_model	CHRNB3
0.191199645785992	basic_model	CLDN18
0.191221002514806	basic_model	BCMO1
0.191317009602683	basic_model	SYPL2
0.191326330460513	basic_model	GAPT
0.191472567506911	basic_model	RARS
0.191831957490374	basic_model	OR1D2
0.192204488661014	basic_model	ANKRD18B
0.19223671415631	basic_model	ENTHD1
0.192718904484088	basic_model	CD300C
0.192742947170211	basic_model	TMPRSS11BNL
0.193043090286769	basic_model	FADS3
0.193060119483127	basic_model	MOGAT3
0.193130794283681	basic_model	TAS1R1
0.193221900172936	basic_model	ALPK3
0.193287838942081	basic_model	ZNF93
0.193340332660809	basic_model	CD3E
0.19334776686712	basic_model	LTA
0.193350500110043	basic_model	C10orf115
0.193945350564647	basic_model	DNTTIP1
0.193963054948212	basic_model	GPR97
0.194121465195045	basic_model	AC007431.1
0.194399936386925	basic_model	NTS
0.194875810716061	basic_model	LGALS16
0.194994977761354	basic_model	BROX
0.195261952177027	basic_model	MAP2K1
0.195569318955899	basic_model	RPL39L
0.195690514058682	basic_model	FBLN5
0.19581505692644	basic_model	DNAJC28
0.195823630164835	basic_model	PCP4L1
0.196081489019622	basic_model	CDC25A
0.196090183331842	basic_model	AP000679.2
0.196131063401619	basic_model	B3GALT1
0.196136815550592	basic_model	AC136297.1
0.196154916527353	basic_model	GNG8
0.196341323442409	basic_model	PTRH2
0.196509740725734	basic_model	MS4A10
0.196729657455375	basic_model	ETS2
0.196730175135718	basic_model	LUM
0.196882808668654	basic_model	GREB1L
0.196897506860912	basic_model	AC016722.2
0.196917225227407	basic_model	OBFC1
0.196920853192143	basic_model	CCL14
0.197005099608007	basic_model	SPINK7
0.19724826640166	basic_model	TEX101
0.197353212716729	basic_model	ATF1
0.197381635416093	basic_model	ZBTB6
0.197741544471612	basic_model	GHR
0.198088671599506	basic_model	NR2E1
0.19810257366933	basic_model	HYAL4
0.198119343575975	basic_model	PLEKHA1
0.198786865431707	basic_model	CDC42SE1
0.198866183022467	basic_model	AL357673.1
0.198933472184147	basic_model	MPZL3
0.199731503239692	basic_model	C1orf170
0.199788947144162	basic_model	MEPE
0.199995507207811	basic_model	PLSCR4
0.200007309808835	basic_model	SLCO1B1
0.200033798825507	basic_model	ARL5C
0.200183120702332	basic_model	CTXN3
0.200188062852903	basic_model	AC073528.1
0.20068510428844	basic_model	RBX1
0.200780767308625	basic_model	MAP2K4
0.201035845763831	basic_model	CGB5
0.201128286904361	basic_model	TGFBR1
0.201309324126126	basic_model	GYPE
0.201521678161921	basic_model	OR10H2
0.201623624601799	basic_model	AC121757.1
0.201759977327704	basic_model	RPTN
0.201779349178233	basic_model	GABRG1
0.201830201826856	basic_model	C15orf54
0.201962036203159	basic_model	OTOGL
0.202062270503551	basic_model	PYDC2
0.202110246893947	basic_model	FFAR3
0.202594014032241	basic_model	LRRC29
0.202784719837905	basic_model	C19orf69
0.20327834874213	basic_model	ZNF425
0.203529737373528	basic_model	OR5T2
0.203766970724563	basic_model	LRP2
0.204261805062724	basic_model	CHRND
0.204543694333491	basic_model	CAGE1
0.204707846722477	basic_model	TLL1
0.204908068993459	basic_model	AC093802.1
0.204936872291185	basic_model	PDZD9
0.205446199028231	basic_model	HNRNPA1
0.205610343655306	basic_model	GRID2
0.205636157838058	basic_model	HRNR
0.20595599567577	basic_model	MYCT1
0.206137708919704	basic_model	TIMP4
0.2062520955548	basic_model	OR5AC2
0.20655640965288	basic_model	KRTAP19-8
0.206692429234274	basic_model	CES1
0.206752352585108	basic_model	PARVB
0.206783004335363	basic_model	SLC22A6
0.206917794531246	basic_model	AC024257.1
0.20717980324815	basic_model	DSN1
0.207247590880007	basic_model	KRT40
0.207291926264594	basic_model	KPNA7
0.20733929030941	basic_model	RAB18
0.207372392251487	basic_model	OR11L1
0.20742011562657	basic_model	LINC00955
0.20776279625214	basic_model	ZSCAN5B
0.208139660099925	basic_model	ZNF768
0.208227077633424	basic_model	MS4A7
0.209195712131409	basic_model	TSC22D1
0.209370200042542	basic_model	VSTM4
0.209429005684366	basic_model	CCDC28A
0.209449968747821	basic_model	TFF1
0.209573141198255	basic_model	DEFB110
0.209967945916042	basic_model	HIST1H2BA
0.210065268660947	basic_model	TAF13
0.210137372723535	basic_model	AP001055.1
0.210348999441378	basic_model	KEL
0.210382084945179	basic_model	CILP2
0.21058468079948	basic_model	PPP2CA
0.210634921248372	basic_model	FABP2
0.210865476542943	basic_model	CFHR2
0.211031000406459	basic_model	LINGO2
0.211090789851735	basic_model	SULT1A2
0.211137165177127	basic_model	MICALCL
0.211140845556693	basic_model	DMBX1
0.21126925761356	basic_model	TSHZ2
0.211549647047125	basic_model	UGT1A10
0.211666887558051	basic_model	KRTAP10-6
0.211689243122206	basic_model	PARPBP
0.211710348994412	basic_model	FCRL5
0.211874638291613	basic_model	OR52L1
0.212093541851813	basic_model	AC004528.1
0.212094970509726	basic_model	UGT3A2
0.212746199610007	basic_model	GRB2
0.213275417498852	basic_model	C1orf234
0.213281067721023	basic_model	CDSN
0.213840498824723	basic_model	OR2L2
0.213929193311153	basic_model	CCDC14
0.214021149482319	basic_model	AL353354.1
0.214544821005819	basic_model	OR51L1
0.214701370482305	basic_model	TRIM48
0.214897566542583	basic_model	CD300E
0.214921288052162	basic_model	OR51S1
0.21510524402944	basic_model	ABCG4
0.215132853988717	basic_model	AL133481.1
0.215193145730838	basic_model	PDE7B
0.215336083136444	basic_model	TP53INP1
0.215571264774156	basic_model	AKR1B15
0.21560558772862	basic_model	ARID3C
0.215709678387413	basic_model	DYRK3
0.215849541509016	basic_model	ATP8B4
0.215933628669746	basic_model	ABT1
0.216013706997929	basic_model	HRC
0.216241333833555	basic_model	WISP3
0.216260619392185	basic_model	CCDC63
0.216297197886644	basic_model	TAGLN3
0.2163058525352	basic_model	AP002884.3
0.216355003031273	basic_model	OR10J1
0.216525083958553	basic_model	CCDC170
0.216573471142847	basic_model	RP11-944L7.5
0.216647557006713	basic_model	NPY
0.216705992037617	basic_model	SGCZ
0.217019861781847	basic_model	OR5D14
0.217173373462893	basic_model	OR51B6
0.217273827706639	basic_model	OR52B1P
0.21742687237247	basic_model	TRIB1
0.217537121235078	basic_model	CNGB3
0.217565276243744	basic_model	ALDOB
0.217602644937634	basic_model	TMEM105
0.217719966609472	basic_model	RAB27B
0.218195806073195	basic_model	S100A13
0.218505398500907	basic_model	CYP11B2
0.218637776525108	basic_model	CD93
0.218700091091476	basic_model	MLN
0.218864565833386	basic_model	NPCDR1
0.218943401315616	basic_model	C14orf164
0.2191659787515	basic_model	VPREB1
0.219282985881481	basic_model	GABRG2
0.219510454105681	basic_model	PTGIS
0.219538433418296	basic_model	CYP4A22
0.219542862590329	basic_model	CLPSL2
0.219756815777888	basic_model	SLC8A3
0.219875249174454	basic_model	RAB7A
0.219960650149465	basic_model	STK38
0.220089127974273	basic_model	C5orf28
0.220125564848859	basic_model	KRT35
0.220134675893431	basic_model	PAPPA
0.220459265162915	basic_model	PLXDC2
0.220988415592518	basic_model	SLC17A4
0.221083713559074	basic_model	GNMT
0.2212650185	basic_model	FCGR3A
0.221359069803995	basic_model	CCDC168
0.221655260636684	basic_model	ZNF205
0.221673880808937	basic_model	TNFSF14
0.221846668455238	basic_model	STAB2
0.221896769931449	basic_model	POLDIP2
0.222173715971955	basic_model	NBPF14
0.222232948013829	basic_model	INPPL1
0.22225055394726	basic_model	SWI5
0.222319618974226	basic_model	OR14K1
0.222494696035506	basic_model	CELA3A
0.222559544726852	basic_model	PITRM1
0.222622228965909	basic_model	SEPT14
0.222701673442292	basic_model	OR52I2
0.222752384429281	basic_model	AGO4
0.222889105643586	basic_model	KCNU1
0.222955342406914	basic_model	DNASE1L3
0.223027081990291	basic_model	MS4A18
0.223324281686837	basic_model	HIST1H2AA
0.223388029698572	basic_model	KLRD1
0.223411630488921	basic_model	RIT2
0.223498470922953	basic_model	PAPL
0.223541895202095	basic_model	PTPRK
0.224272883223408	basic_model	METTL11B
0.224771003670294	basic_model	PCDHA12
0.224908699441533	basic_model	JAKMIP1
0.224954611033908	basic_model	CYP4F11
0.225294375446235	basic_model	VPREB3
0.225444003197794	basic_model	CATSPER2
0.225471298172161	basic_model	KRTAP5-5
0.225508514221838	basic_model	C18orf42
0.225851554100555	basic_model	KRTAP6-3
0.225857478602988	basic_model	ARHGAP28
0.225922314933854	basic_model	CHIA
0.226063599752709	basic_model	SNN
0.226155457887013	basic_model	MEI1
0.22625196012034	basic_model	GIMAP2
0.226615135048244	basic_model	TRHR
0.228274746782398	basic_model	RFX5
0.228448997252218	basic_model	SLC12A5
0.228495457113885	basic_model	TNNC2
0.228743046266879	basic_model	CYP2C8
0.228883740486322	basic_model	RPGRIP1
0.229074105638607	basic_model	RBBP8NL
0.229410758123036	basic_model	TMCC1
0.22944355141665	basic_model	DYNC2LI1
0.229467771508451	basic_model	CCNA2
0.22950716699592	basic_model	OR9K2
0.229824499618331	basic_model	SNCB
0.229825096390124	basic_model	CRCP
0.229861270341801	basic_model	CD84
0.229892100002614	basic_model	DRD2
0.229942623530652	basic_model	C9orf92
0.229985713333049	basic_model	CTD-2049J23.3
0.230126227348832	basic_model	CASQ1
0.230582838702597	basic_model	PKD2L1
0.230647095625137	basic_model	SIRPG
0.230975064892775	basic_model	NRXN3
0.231083742871332	basic_model	NIM1
0.231242969971235	basic_model	SLC12A1
0.231564241234508	basic_model	ZNF781
0.231580537460433	basic_model	RP11-47I22.4
0.231867263134736	basic_model	ARL14EPL
0.231966551356363	basic_model	OR10G6
0.23201031510502	basic_model	WAC
0.232120232778277	basic_model	UGT3A1
0.232226759828763	basic_model	KRTAP20-3
0.232446026391311	basic_model	C17orf98
0.232637047132189	basic_model	STOX1
0.232802067102191	basic_model	FRS3
0.23337155415767	basic_model	AC027309.1
0.233509492263652	basic_model	PSTPIP2
0.233754603334267	basic_model	FGF12
0.23376504312666	basic_model	PKD1L2
0.233803772655511	basic_model	OVCH1
0.233913888085523	basic_model	PCDHB2
0.23418046456739	basic_model	FZR1
0.234366762596337	basic_model	KIF17
0.234398951885314	basic_model	PCDHA3
0.234645279548496	basic_model	LRFN5
0.234877951331874	basic_model	SERPINB13
0.235280922378533	basic_model	RNF41
0.235461213153076	basic_model	CEBPE
0.235740674390869	basic_model	RP1-228P16.5
0.235947665260622	basic_model	RNF148
0.236082703954542	basic_model	CLEC4A
0.236124528459713	basic_model	OR4M1
0.236265499342189	basic_model	RP11-105C20.2
0.23629873720284	basic_model	GDF2
0.237070110250758	basic_model	RBMXL1
0.237188974972552	basic_model	WNT7A
0.237253686102282	basic_model	RPP25L
0.237294208519305	basic_model	DUSP19
0.23736180294716	basic_model	TOPAZ1
0.237549204109907	basic_model	GPR12
0.237745373094221	basic_model	JTB
0.23778247270774	basic_model	OR51M1
0.238024178557786	basic_model	PNMAL1
0.238082888660613	basic_model	C16orf11
0.238180281922253	basic_model	TMEM150C
0.238368190211575	basic_model	ASXL2
0.238428309327335	basic_model	GJB4
0.238463802886641	basic_model	SERTM1
0.238486556306687	basic_model	COPZ2
0.238722656633888	basic_model	ADGB
0.239047171852478	basic_model	KRTAP20-1
0.239365627541106	basic_model	SDR16C5
0.239514153765959	basic_model	OR1J2
0.239520362704173	basic_model	OR1N2
0.239568236182106	basic_model	VN1R4
0.239687438388449	basic_model	LGALS13
0.239751430627869	basic_model	OR52A5
0.239778266302458	basic_model	NIF3L1
0.240019811974973	basic_model	TM2D2
0.24028780638297	basic_model	AFMID
0.240407871106692	basic_model	PINLYP
0.240454184092313	basic_model	SLC1A3
0.240456826317164	basic_model	RETN
0.240505240868199	basic_model	C1ORF220
0.240694813104389	basic_model	GSTK1
0.240763030559167	basic_model	B3GNT3
0.240805707844127	basic_model	TIMP3
0.240835743830432	basic_model	SPATA24
0.241060653889535	basic_model	SAA1
0.241267427541926	basic_model	SERPINB7
0.241425479574301	basic_model	MYOM3
0.241490498501992	basic_model	TTC24
0.241532298719948	basic_model	RP11-10J21.3
0.241670826211763	basic_model	TMEM244
0.242169256379619	basic_model	LDHAL6A
0.242258609841266	basic_model	TPD52L3
0.242422818515993	basic_model	PHF5A
0.242750667124826	basic_model	OR2T3
0.242825390637772	basic_model	RPL41
0.24294290777858	basic_model	OSBPL6
0.242966533372406	basic_model	C21orf62
0.243117359342285	basic_model	SCAMP5
0.243414348980804	basic_model	CDCA8
0.243499522060626	basic_model	ACSM5
0.243678611888247	basic_model	CHCHD4
0.243811155243328	basic_model	EFCAB8
0.243849132952145	basic_model	GPR142
0.243913745677249	basic_model	MUTYH
0.244032127971297	basic_model	IFITM3
0.24405542994864	basic_model	CDH1
0.244187811035833	basic_model	ASS1
0.244319819977172	basic_model	SUB1
0.244506066261748	basic_model	OR8D1
0.244715702560895	basic_model	C17orf74
0.244811738675265	basic_model	CCM2
0.245216629962409	basic_model	RB1
0.245371645317013	basic_model	RBM47
0.245930312716412	basic_model	BAI3
0.245989523101832	basic_model	CHST3
0.245997377464209	basic_model	COPB1
0.246047053154047	basic_model	AC002451.1
0.246239664557579	basic_model	SNAI2
0.246381435791892	basic_model	LHX4
0.246647795259768	basic_model	GLYATL2
0.246750166640947	basic_model	C1orf177
0.24700673649265	basic_model	CLDN16
0.247476135008662	basic_model	C1orf51
0.247562074986564	basic_model	GABRD
0.247749893344586	basic_model	ADAMTS10
0.247820733217231	basic_model	IFRG15
0.24792642095809	basic_model	PHOSPHO2
0.248082843015944	basic_model	PRB4
0.248110687142817	basic_model	OR7E24
0.248196902582272	basic_model	TMC5
0.248360877264033	basic_model	PON1
0.248702555892086	basic_model	NUDT13
0.24872218181452	basic_model	PRAMEF12
0.248790251974585	basic_model	ELOVL7
0.248843984320478	basic_model	LRRC52
0.249064414643287	basic_model	ZNF285
0.249076108566227	basic_model	PKMYT1
0.24920388326381	basic_model	MARCH7
0.249414919038986	basic_model	SEC14L5
0.249559187647513	basic_model	CCDC141
0.249639712230239	basic_model	MORC1
0.249746912499191	basic_model	TBC1D20
0.249881539574319	basic_model	ADH1B
0.250223887051412	basic_model	RAD51C
0.250302562300195	basic_model	ARL2
0.250322150538976	basic_model	MYO18B
0.250410752617814	basic_model	AC012485.1
0.25092887080882	basic_model	C12orf54
0.250935273543148	basic_model	DPEP1
0.251342258009329	basic_model	CHIC2
0.251360221166988	basic_model	TGIF1
0.251718511590321	basic_model	VAPB
0.25200957107939	basic_model	LRRC4C
0.252039113369441	basic_model	AC005082.1
0.252701730546778	basic_model	SPOP
0.252872806924263	basic_model	GLI1
0.252928481099858	basic_model	CLDN1
0.252934453145824	basic_model	OR51J1
0.253024742644175	basic_model	YIPF3
0.253046578673209	basic_model	SEMA3C
0.253130653502319	basic_model	CNRIP1
0.253670254224526	basic_model	OR6M1
0.254142129957375	basic_model	GNA15
0.254320765546053	basic_model	SBSN
0.254379688827323	basic_model	TXNRD1
0.254796689116903	basic_model	HOXC11
0.255159829759506	basic_model	CAPG
0.255344753946973	basic_model	ACADM
0.255613778388642	basic_model	PSKH1
0.25566609903021	basic_model	OR14J1
0.25586088125091	basic_model	TMPRSS11A
0.256088711640001	basic_model	SCN11A
0.256211559966458	basic_model	AC104534.3
0.256350216588902	basic_model	AL109659.1
0.256510498686856	basic_model	ADCY5
0.256556871951528	basic_model	KRTAP10-1
0.256788732465102	basic_model	ANXA1
0.256948268613393	basic_model	SYT14
0.25706254839227	basic_model	NLRP10
0.257173102170954	basic_model	ADAM29
0.257321523762309	basic_model	DCTD
0.257323238971225	basic_model	ANHX
0.257511137957777	basic_model	OR13G1
0.25799794806011	basic_model	PSG1
0.258017916230177	basic_model	METTL8
0.258083617734167	basic_model	GATAD2B
0.25814173533445	basic_model	UGT2B4
0.258195430545359	basic_model	PROK1
0.258328342865586	basic_model	VWA5B2
0.258348271238504	basic_model	IFNE
0.258477179567339	basic_model	SLC17A1
0.258558353993993	basic_model	SRSF3
0.25866621477028	basic_model	MPP7
0.258809884808523	basic_model	PTGDR
0.259238644491339	basic_model	OR2B2
0.259291191827216	basic_model	SERPINA10
0.259365553960408	basic_model	GPNMB
0.259393464029258	basic_model	SLAMF9
0.259742905111015	basic_model	GOLT1A
0.259766465404778	basic_model	CRABP1
0.259802505470362	basic_model	C10orf112
0.25981129532235	basic_model	DYNAP
0.259821324980195	basic_model	KRT76
0.259992970930159	basic_model	MR1
0.26001949461232	basic_model	REEP1
0.260121540746722	basic_model	B3GAT1
0.260312898776984	basic_model	BCO2
0.260335753851111	basic_model	GRM3
0.260542099663199	basic_model	ARL2BP
0.260572205030365	basic_model	TRAPPC6A
0.260811018834102	basic_model	AC006372.1
0.260815192264694	basic_model	DEFB126
0.261150898610024	basic_model	LIMA1
0.26145477115368	basic_model	MND1
0.261627161164097	basic_model	OR5I1
0.261856839005069	basic_model	RNF183
0.262042715458353	basic_model	ST6GAL2
0.262090213820741	basic_model	MATK
0.262668250937375	basic_model	AGXT2
0.262728611922645	basic_model	CTD-3105H18.16
0.262938146428331	basic_model	GALNT13
0.262964750069827	basic_model	P4HA2
0.263110739116307	basic_model	SLC25A18
0.263155288223636	basic_model	TNNI2
0.263296227967808	basic_model	DLGAP4
0.263341710153386	basic_model	GPX5
0.263503456703313	basic_model	HPCAL1
0.263623506279452	basic_model	ITIH2
0.263643155557822	basic_model	OR8D2
0.263929232850254	basic_model	PRSS35
0.264000818987751	basic_model	SEC13
0.264141979579063	basic_model	RBM48
0.26445503909445	basic_model	IQCF1
0.264481097827246	basic_model	TNFRSF11A
0.264535862684413	basic_model	IP6K3
0.264644143734432	basic_model	LRTM1
0.264782381504704	basic_model	C5orf48
0.264872569682173	basic_model	PCF11
0.264952543394565	basic_model	SNX3
0.265519555426785	basic_model	SPINK13
0.265705310585082	basic_model	RGS4
0.265872467879788	basic_model	ACSM4
0.265945937585826	basic_model	OR51B2
0.266053538755881	basic_model	SMARCA4
0.266069566460341	basic_model	ZNF560
0.266090354963533	basic_model	C7orf31
0.266282750121785	basic_model	FAM71E2
0.266351360418324	basic_model	AL132989.1
0.266553440084338	basic_model	FUCA2
0.267456314726955	basic_model	TGM1
0.267578842245659	basic_model	RP11-598P20.5
0.267705481691682	basic_model	HOXC9
0.26773191163715	basic_model	OR1L4
0.267824222419315	basic_model	FAM181A
0.267941122459205	basic_model	NRIP3
0.26795075918062	basic_model	NF2
0.26801600955183	basic_model	OR2L13
0.268064893232898	basic_model	PPM1N
0.268318816359618	basic_model	TMEM132D
0.268327477230539	basic_model	SYT1
0.268601875173043	basic_model	RGP1
0.268636588936454	basic_model	OR2T34
0.268871892491272	basic_model	VNN1
0.268887187664242	basic_model	PHF7
0.2691877851185	basic_model	CPA1
0.26920380764449	basic_model	CATSPERB
0.269242485749485	basic_model	SNX33
0.269388857146077	basic_model	GJB7
0.269488690691683	basic_model	TBC1D22A
0.269664364590447	basic_model	LCE3D
0.269719284859195	basic_model	TCF21
0.270170798776221	basic_model	UCP2
0.270219115165056	basic_model	PLA2G7
0.270277631866802	basic_model	HECW2
0.270464072019409	basic_model	NDUFAF6
0.27054228222759	basic_model	EMB
0.270871813667135	basic_model	OR5B3
0.271076966482921	basic_model	KRT17
0.271766226551511	basic_model	RYR3
0.272131845164815	basic_model	PID1
0.272176231981978	basic_model	ZNF331
0.272316895318317	basic_model	RP11-410N8.4
0.272562872458698	basic_model	TEX19
0.272801443383542	basic_model	SLC1A2
0.272950494007703	basic_model	AOC2
0.273456570350478	basic_model	AC006132.1
0.273489913940759	basic_model	PRIM1
0.273786019929901	basic_model	OR2T1
0.273935826176363	basic_model	HYPK
0.274039302515932	basic_model	C1orf143
0.274195549503582	basic_model	KCNE3
0.274360145824112	basic_model	EDEM1
0.274743608251045	basic_model	CRTC2
0.275006466447247	basic_model	RNF181
0.275280947382301	basic_model	EVPLL
0.275370180506927	basic_model	ANXA3
0.275373637128747	basic_model	LDHC
0.275518730668208	basic_model	SERTAD4
0.275651511055245	basic_model	POU2AF1
0.275778232773362	basic_model	EIF1
0.275807107023565	basic_model	MYO5C
0.276114781627442	basic_model	GPIHBP1
0.276348583839749	basic_model	COX8A
0.27640020575501	basic_model	KRT83
0.276682815101637	basic_model	SLCO2A1
0.276761125554508	basic_model	CPA2
0.276860455720064	basic_model	CRELD1
0.276971476092519	basic_model	CFLAR
0.277042128967246	basic_model	SLC28A1
0.277246338694676	basic_model	SULF2
0.277356221541012	basic_model	ZNF706
0.277379643727946	basic_model	APRT
0.277584169568351	basic_model	DLGAP2
0.277624410173659	basic_model	PTPN9
0.277699892311007	basic_model	MRPL53
0.278308268944951	basic_model	WNT8A
0.278715815388193	basic_model	GRP
0.278785867683974	basic_model	LIMS2
0.279054618490232	basic_model	GPR161
0.279105411797251	basic_model	ZDHHC6
0.279343316363757	basic_model	OR2W3
0.279500247982732	basic_model	TNFAIP3
0.27976586679713	basic_model	CNPY1
0.27980202221244	basic_model	DAO
0.279968112711146	basic_model	PRDX1
0.280024833996054	basic_model	FMOD
0.280272164568275	basic_model	BTN2A1
0.280367899307214	basic_model	GSTM3
0.280671769706707	basic_model	MYOM2
0.280763854294924	basic_model	CEACAM19
0.280822629099187	basic_model	MLIP
0.280827165359706	basic_model	TLR10
0.280941407909458	basic_model	ATAD2
0.281118530042903	basic_model	HNF4A
0.28128353446871	basic_model	MARCH4
0.281412327311547	basic_model	RP11-944C7.1
0.281507543434926	basic_model	CMA1
0.281644148021823	basic_model	HSPA8
0.281971561468549	basic_model	PRMT7
0.281993145088131	basic_model	CTD-3088G3.8
0.282047881718175	basic_model	EMR3
0.282440637740355	basic_model	LST3
0.282565292868025	basic_model	INHBC
0.282834542136593	basic_model	AC019206.1
0.282858621282776	basic_model	RGS7
0.283073687871185	basic_model	TAAR2
0.283136582586967	basic_model	CDC42
0.283145735023513	basic_model	NAMPT
0.283188753766231	basic_model	OR5D13
0.283390892230988	basic_model	AGTR1
0.283579147408828	basic_model	WFDC12
0.283616286476863	basic_model	GSDMB
0.283936858426115	basic_model	ACD
0.284050575210667	basic_model	PAPPA-AS1
0.284272431464917	basic_model	RBBP6
0.284342895894635	basic_model	OR56B1
0.284390788219443	basic_model	SCG2
0.284403385205909	basic_model	C12orf56
0.284769564178779	basic_model	POU1F1
0.284947893364524	basic_model	OR5H2
0.284976071271715	basic_model	MAS1
0.285379113898944	basic_model	RP11-155D18.14
0.28579480221526	basic_model	CMBL
0.286350483660884	basic_model	PRED62
0.286400390322096	basic_model	ARMS2
0.286510419000671	basic_model	OR4B1
0.28655351812522	basic_model	WDR88
0.28688624174061	basic_model	NME9
0.286921385863042	basic_model	CCDC40
0.287095337890096	basic_model	MTRNR2L8
0.287106340357615	basic_model	SPAG6
0.287679065724705	basic_model	LAMA2
0.287715038611222	basic_model	ATP6V1E2
0.287770556706612	basic_model	TRIM46
0.287786562866952	basic_model	CCR8
0.287856504133971	basic_model	CCDC68
0.288067507762493	basic_model	TEKT5
0.288263356546883	basic_model	PPIC
0.288275443428568	basic_model	PDE1C
0.288469721093339	basic_model	EPO
0.288916126261115	basic_model	CACNA2D4
0.289158020825858	basic_model	GRM7
0.28929645292233	basic_model	AC226150.4
0.289630301087891	basic_model	RNF214
0.289724626180754	basic_model	RPL27
0.289797122168298	basic_model	PRPF6
0.289846648039381	basic_model	SLC16A12
0.290304535331256	basic_model	CTAGE1
0.290696840534063	basic_model	GJA8
0.290869140370289	basic_model	KPNA4
0.290878652268456	basic_model	PHF11
0.290917902796403	basic_model	COX6C
0.291080765821378	basic_model	ITGAL
0.291132232214663	basic_model	SEC61B
0.291169640846371	basic_model	IL27RA
0.291352890472756	basic_model	HLA-DOA
0.291359217411333	basic_model	WNT8B
0.291545509254979	basic_model	C16orf87
0.291662535334715	basic_model	ZNF385A
0.291731759770779	basic_model	SSR2
0.291815410759533	basic_model	ZNF669
0.291844707673444	basic_model	MAGOH
0.291998644890791	basic_model	CLIC4
0.292221884675076	basic_model	PTPRC
0.292300358587496	basic_model	WISP2
0.292326901136573	basic_model	HP1BP3
0.292813212643792	basic_model	GPR152
0.293013706668071	basic_model	OR2T7
0.293170435647909	basic_model	ACSL6
0.293295413706111	basic_model	GATA2
0.29348544414501	basic_model	CHST8
0.293499829435923	basic_model	AL133318.1
0.293544107826237	basic_model	C11orf85
0.293561845753747	basic_model	AL117190.3
0.293747001372968	basic_model	KRTAP3-1
0.294116635476697	basic_model	CCDC144NL
0.294207054761093	basic_model	RFX1
0.294289154244193	basic_model	NKIRAS1
0.294343590645088	basic_model	AC114494.1
0.294505641052153	basic_model	NTRK1
0.294740361743793	basic_model	MBD3L1
0.295115001818307	basic_model	USP8
0.295148568099016	basic_model	IFNA7
0.295216030581363	basic_model	CLIC1
0.295329175239668	basic_model	ZNF804A
0.295406060865887	basic_model	ANKFN1
0.295660445450913	basic_model	OR10G2
0.295691276255041	basic_model	CLPS
0.295754921817742	basic_model	AQP10
0.295868050694398	basic_model	REM1
0.29593185915455	basic_model	ZNF492
0.296199876035002	basic_model	SCGN
0.296700232520665	basic_model	FMO3
0.297066063368754	basic_model	ARMC1
0.297312011284633	basic_model	CD1C
0.297370032209044	basic_model	MRPS12
0.297399023976601	basic_model	DGAT2
0.297467740637283	basic_model	EXOSC9
0.297523726759468	basic_model	CTD-3214H19.16
0.297667997266422	basic_model	OSMR
0.297701752525006	basic_model	P2RX3
0.297703684152381	basic_model	HSD17B13
0.298151259781067	basic_model	C2orf68
0.298257899222787	basic_model	CREG2
0.298510145312877	basic_model	FAM200A
0.298679213551392	basic_model	RP11-247C2.2
0.298920068978671	basic_model	AL138815.2
0.299141795153054	basic_model	TM6SF2
0.29941823028955	basic_model	SH2D1B
0.299459552186215	basic_model	MPP6
0.299578442135487	basic_model	CELA1
0.299794246570805	basic_model	SCARA5
0.299830220089456	basic_model	CASP16
0.299943960846741	basic_model	OR8B4
0.300019719783825	basic_model	OR10A6
0.300031440334365	basic_model	RP11-817J15.3
0.300083101998535	basic_model	NANOG
0.300158340781345	basic_model	POU6F1
0.300243225546503	basic_model	NEUROD6
0.30047327697598	basic_model	NPPB
0.300990850444698	basic_model	ERGIC3
0.301371361912982	basic_model	ZFYVE28
0.301535058882995	basic_model	AC016559.1
0.301580804632106	basic_model	FOLH1
0.302690926420942	basic_model	DCUN1D2
0.302866602317513	basic_model	PSMA6
0.302964300714416	basic_model	AFM
0.303006993972278	basic_model	USP7
0.303125410140549	basic_model	IL6R
0.303131345750804	basic_model	HIF3A
0.303193073962922	basic_model	PSMB11
0.303539478108369	basic_model	CLMP
0.303616211129066	basic_model	TDRD12
0.303656006444171	basic_model	AL445665.1
0.303762216558077	basic_model	RP11-1C1.5
0.303942270009571	basic_model	ZNF709
0.303954215534323	basic_model	ZNF709
0.30416864879152	basic_model	BFSP2
0.304548684415906	basic_model	MUC13
0.304652424663627	basic_model	OR4A5
0.304667473851419	basic_model	STAC
0.304708505871793	basic_model	ZNF556
0.304988919106738	basic_model	OR2M5
0.305130326057522	basic_model	SBK3
0.305648893157391	basic_model	C11orf63
0.305882508922456	basic_model	GTF2E2
0.30603575039129	basic_model	C14orf182
0.306106656101208	basic_model	MRPS17
0.306189556755584	basic_model	DNAJC24
0.306543020181162	basic_model	SCHIP1
0.306585592111506	basic_model	LRRC27
0.306614349170263	basic_model	RNASE12
0.30666000038477	basic_model	SH3GL2
0.306906623434206	basic_model	PRSS23
0.306925423744106	basic_model	NUP210L
0.306943087523906	basic_model	OR10G9
0.307116449324235	basic_model	CD177
0.307874901702989	basic_model	COL4A1
0.307893282940745	basic_model	UPB1
0.307999791257918	basic_model	CENPH
0.308066651546849	basic_model	RTBDN
0.308079534009265	basic_model	SERPINB9
0.308297572401505	basic_model	SZRD1
0.308517999673185	basic_model	OR6Q1
0.308632181242682	basic_model	COL7A1
0.308703173381388	basic_model	HM13
0.308952140234821	basic_model	OR1L3
0.309171171543746	basic_model	NMU
0.309240524421522	basic_model	FPR2
0.309312561825161	basic_model	C3AR1
0.30946092270704	basic_model	ATCAY
0.309622679367765	basic_model	IL11RA
0.309700852499321	basic_model	RBP5
0.309927432369172	basic_model	OR4E2
0.309950248321933	basic_model	RYK
0.309959745152539	basic_model	SPATA16
0.309996630179138	basic_model	WIPF1
0.310073316618181	basic_model	NUP155
0.310183023141783	basic_model	TEX14
0.310308889114623	basic_model	ZDHHC4
0.310542894650674	basic_model	AMICA1
0.310783944357049	basic_model	EFEMP2
0.310910574108852	basic_model	FDCSP
0.311100681152343	basic_model	GJE1
0.311192374369884	basic_model	KRT222
0.311253063593356	basic_model	DMBT1
0.311368350976332	basic_model	LILRA2
0.311398139279772	basic_model	SIVA1
0.311405398667527	basic_model	BAP1
0.311629941826828	basic_model	DRD3
0.311729367113143	basic_model	LCA5
0.311893637142038	basic_model	LYRM7
0.311920553170097	basic_model	SPARCL1
0.312053021948172	basic_model	KCNJ4
0.312226742448098	basic_model	SEC14L4
0.312328206862718	basic_model	ASPRV1
0.312497920345806	basic_model	PRKCI
0.312602295952809	basic_model	MUC7
0.313069841647271	basic_model	ZDHHC11
0.313102571140262	basic_model	KRTAP13-1
0.313447608886987	basic_model	KCNE2
0.313580822932683	basic_model	C8orf31
0.313673559323161	basic_model	KRTAP21-3
0.313775114997826	basic_model	RBM8A
0.313808472009989	basic_model	OLFML2A
0.31386808535375	basic_model	OR13D1
0.314450258080511	basic_model	ADAM12
0.314510357365515	basic_model	PFN4
0.314887793610681	basic_model	CCDC64
0.314923610534332	basic_model	TINF2
0.314973723445842	basic_model	OR13C4
0.315288526875105	basic_model	CAMK1D
0.316319781960507	basic_model	LCE5A
0.316574856910951	basic_model	GOPC
0.31687580333108	basic_model	ATP5EP2
0.317462739590218	basic_model	CCDC177
0.317617837815723	basic_model	IL2
0.317925442493913	basic_model	DNMT3L
0.318103027490966	basic_model	C16orf96
[truncated: 94,281 more rows]
