# Supplementary material for: Non-coding cancer driver candidates identified with a sample- and position-specific model of the somatic mutation rate
Source: eLife journal article supplement (doi:10.7554/elife.21778), 2017-03-31
Supplement: supp [file elife-21778-supp-v2.zip › elife_poa_e21778_Figure_4_source_data_3.txt]

y	probability
0	0.0174503002390891
110	0.000284381271722712
112	0.000144919379365643
126	1.54266910332008e-05
143	0.000144919379365643
145	1.54228239362905e-05
148	1.32694564594624e-05
149	3.6031699869076e-05
150	2.96043812630665e-05
153	1.54266910332008e-05
155	0.000284381271722711
157	0.000284349170149102
159	0.000297699633054352
160	4.12032065105562e-05
161	0.000268224477424346
162	4.5074426157462e-05
163	4.07678114847266e-05
164	2.06050088358752e-05
165	1.33183613316402e-05
166	8.6050824318192e-05
167	9.54751171748926e-05
168	1.54874913517247e-05
169	0.000217092094670568
171	0.000310535170762954
172	5.15191912208007e-05
173	8.97893764477846e-05
174	0.000232525993309604
175	0.000345958889350986
176	7.51518528629572e-05
177	0.000958119089581025
178	0.000201052828261664
179	0.000139005879207989
180	0.000165665804427332
181	7.59434594779969e-05
182	5.08241503458123e-05
183	0.000620514479633096
184	0.00043885487206516
185	0.000106246419159659
186	0.000316103490184427
187	0.000569124093494097
188	0.000545592564003651
189	0.00034845350887743
190	0.00105566324739041
191	0.00180001466659194
192	0.00050319211301403
193	0.000718637106102863
194	0.00112157685315807
195	0.000828744494520635
196	0.00082961579916566
197	0.00174781209653722
198	0.00197664852582776
199	0.0015722567363008
200	0.0022000972154694
201	0.00142327838923355
202	0.00715374352789071
203	0.00133609855404852
204	0.00148013536900818
205	0.00247159272797562
206	0.0012401474532524
207	0.000974756232321369
208	0.00133885421591613
209	0.000685640685904455
210	0.000986124698538683
211	0.000767235655428846
212	0.00117715226675694
213	0.000446839362716153
214	0.000528803101517795
215	0.000371822049330185
216	0.000936896790056689
217	0.00058947438077205
218	0.00039655912154685
219	0.000655386092150613
220	0.000409814320059028
221	0.000811898800135479
222	0.000773241867091025
223	0.000758086897898444
224	0.000312025704886238
225	0.00079328138164513
226	0.000388130789730045
227	0.000246619288821137
228	0.000260273756512829
229	0.000494187838718684
230	0.000306766284835321
231	0.000178423529051162
232	0.000334372161460102
233	0.0007428075976712
234	0.000424329552238276
235	0.000367843190728082
236	1.84844785004589e-05
237	0.000193886516734101
238	0.000580159608324566
239	0.000105322325068672
240	0.000409003151723217
242	0.000561426514330757
243	0.000189702783581144
244	0.000159624849668949
245	0.000807924414642482
246	0.000837558900836368
247	0.000343995615746175
248	0.000293873275478721
249	0.000450447866005702
250	2.80093494871584e-05
251	0.000249746110323563
252	6.63520991378781e-09
253	9.3016173635069e-05
254	0.000391553293183632
255	0.000464022316612334
256	0.00023069431080489
257	0.000175247085754436
258	0.000241110423074201
259	0.000188365443106316
260	0.000576557299781669
261	4.29514280084726e-05
262	0.000265034724287154
263	0.000240566178233129
264	6.21401147113398e-05
265	3.49943946379178e-05
266	0.000105798203796985
267	4.77037318061293e-05
268	8.4717316232797e-05
269	7.34105031062825e-06
270	0.000319884567571039
271	6.85709618499274e-06
272	5.68120578167358e-05
273	9.98944231377811e-05
274	5.72094808670162e-05
275	0.00124223609258475
276	0.000670263486379993
277	0.00160388012212533
278	0.000533611054218091
279	0.00106763441431455
280	1.28618854912026e-07
281	7.11496643120335e-06
282	8.39589744403251e-07
283	4.29353919683215e-06
284	4.21724359436875e-06
285	6.64681800865866e-06
286	3.77768526767289e-06
287	1.87243247595522e-05
288	4.06852794539805e-06
289	1.02582535833651e-05
290	0.000280528234050129
291	2.51399702969343e-06
292	0.000386458271624677
293	1.10849750083619e-05
294	7.61947590757372e-06
295	0.000198821111573617
296	0.000122799155722325
297	0.000131079906682277
298	0.000531587419632614
299	1.05455269553925e-05
300	2.4576987034848e-05
301	3.25455621490255e-05
302	1.97892058292721e-05
303	2.80915496344006e-05
304	2.57123573077558e-05
305	2.07061179852846e-05
306	2.41501453886359e-05
307	3.63527988477411e-05
308	4.01914316969672e-05
309	4.22130242459773e-05
310	5.65249073033058e-05
311	3.71294756831855e-05
312	0.000142093259124151
313	3.42688823039831e-05
314	9.41532258118561e-05
315	5.30946384460255e-05
316	4.40687344019724e-05
317	4.17621450152098e-05
318	4.34117672733057e-05
319	2.31873100236811e-05
320	4.27133178530361e-05
321	2.45216912962128e-05
322	3.53611957182232e-05
323	2.04429676929479e-05
324	2.83880221272299e-05
325	1.54187933303952e-05
326	3.98962834187163e-05
327	2.27283141551218e-05
328	3.50542625014762e-05
329	2.63151493685917e-05
330	3.35045745550221e-05
331	3.39538723137881e-05
332	5.07684779248548e-05
333	4.2406733907435e-05
334	5.62659829535126e-05
335	3.97753261881154e-05
336	4.76645955100832e-05
337	3.74706567643077e-05
338	5.20772347002186e-05
339	4.12582446789213e-05
340	5.3592464475899e-05
341	5.12221986571038e-05
342	5.78152408874092e-05
343	7.31532670920768e-05
344	6.93148035415743e-05
345	0.000127384330185681
346	9.42420322457272e-05
347	8.52248827742802e-05
348	0.000123163178047239
349	9.78639104179094e-05
350	0.000121472206238923
351	0.000120442531501681
352	0.000159215585637549
353	0.000126104948223655
354	0.000163957409372453
355	0.000181998961319751
356	0.000158549779129314
357	0.000283425264246741
358	0.000185621897258236
359	0.000296404031390519
360	0.00022728451104138
361	0.00031885904119339
362	0.000232779167920209
363	0.000296699176366377
364	0.000256019418317569
365	0.000275657760402991
366	0.000272758002459916
367	0.000293433630558712
368	0.000342959361682578
369	0.000321236974361774
370	0.000281156487447369
371	0.000417250652100172
372	0.000316491275317059
373	0.000447176011237373
374	0.000453978990535178
375	0.000459904165856811
376	0.000492994225749942
377	0.000597429223127367
378	0.000500676885902249
379	0.000781761707443731
380	0.000588147945359735
381	0.000631935367784283
382	0.000704872936549694
383	0.000613666734656874
384	0.000632940325390934
385	0.000904690427216919
386	0.000800446863393406
387	0.000802718487172831
388	0.000990436405636433
389	0.0011037886205219
390	0.00105658743641711
391	0.00109558397738028
392	0.00131446703647251
393	0.00159867059796837
394	0.00123008127279162
395	0.00139896134894758
396	0.00161016754646418
397	0.00146673052204795
398	0.00152251774641114
399	0.00189832304917724
400	0.00194562450547423
401	0.00179484058837357
402	0.00211605180789448
403	0.00186443779525217
404	0.00274044922884947
405	0.00180746069291633
406	0.00182062396280707
407	0.00211417017240676
408	0.00169302223144885
409	0.00159409913960713
410	0.00175377235720861
411	0.00141888036304041
412	0.00153062699667548
413	0.00144333725393346
414	0.00150162726050483
415	0.00126766951289731
416	0.00132160296743352
417	0.00123924597389316
418	0.00132310851979645
419	0.00125851490034324
420	0.00120558109921454
421	0.00127272788156577
422	0.00118587978498624
423	0.00130503622500314
424	0.0012671360583267
425	0.00120689681491802
426	0.00106316086962958
427	0.00116067043636152
428	0.00104786987846833
429	0.000996090018581781
430	0.000980197819766341
431	0.00105214384589034
432	0.00099827085661203
433	0.000963333430428363
434	0.000971555808297262
435	0.00108598388431388
436	0.00101110654326815
437	0.00100514288521043
438	0.00086175475143935
439	0.000875326961557682
440	0.000993498427512173
441	0.000767314248893299
442	0.000912775919859711
443	0.00081240235382258
444	0.000975951962497226
445	0.000909386658293509
446	0.000887359314593304
447	0.00105459782717922
448	0.00103704823040048
449	0.000854154485663351
450	0.000911813361783424
451	0.000932190745802152
452	0.000786984647735391
453	0.000842547275628345
454	0.000836016120089716
455	0.000711045091732224
456	0.0008346545194571
457	0.000806602413369501
458	0.000734070276441133
459	0.000719723464734606
460	0.000737605390827747
461	0.000716353868865426
462	0.000807385691711231
463	0.00065286761396492
464	0.000678147117800455
465	0.000749541536821175
466	0.000708790083342514
467	0.000752878480283363
468	0.000770384872770803
469	0.000673885665214184
470	0.000722142069847135
471	0.000628863383069581
472	0.000773618752614831
473	0.000697256282406136
474	0.000749787369742446
475	0.000875527607604958
476	0.000808516155852094
477	0.0011956923950785
478	0.000956831492485798
479	0.00126603514518451
480	0.000939211819025765
481	0.00106060962578005
482	0.000725213101209767
483	0.000669639794799075
484	0.000616006319180796
485	0.000560626722075225
486	0.000495733657412598
487	0.000552741935395347
488	0.000484882000581359
489	0.000548224082974891
490	0.000416100351655978
491	0.000480322818703518
492	0.000529536509439183
493	0.000450380481908369
494	0.000543577115190338
495	0.000470338798065881
496	0.000446958767867244
497	0.000498975016971199
498	0.000502191852551561
499	0.000423324413232371
500	0.000645343463242972
501	0.000372750159763272
502	0.000402054128142839
503	0.000353459769075034
504	0.000331372293309717
505	0.00028966759391594
506	0.000290640391367669
507	0.000251223987218993
508	0.000310559091384912
509	0.000285796721766369
510	0.000290769125601809
511	0.000253545040907868
512	0.000263669155529767
513	0.000235752081969644
514	0.000249842908821985
515	0.000256754024818416
516	0.000206561505013979
517	0.00027483093578998
518	0.000194478047215049
519	0.000241927777497308
520	0.000238523185208662
521	0.000272211142474165
522	0.000265129815878116
523	0.000270096282322992
524	0.000264900999564825
525	0.000224062349983771
526	0.000193918919623524
527	0.00014935391770669
528	0.000172999804636631
529	0.000141228752467917
530	0.000200950752048599
531	0.000182306990424892
532	0.000205799862753949
533	0.000194960112554293
534	0.0001908945156134
535	0.000214565826945143
536	0.000200456242731132
537	0.000226692624855262
538	0.000205481988979282
539	0.000199248997022536
540	0.000185988226296348
541	0.000184625518180457
542	0.000169073235829683
543	0.000192142927263161
544	0.000185968786607409
545	0.000207565883455949
546	0.000194151396475909
547	0.000231126913053339
548	0.000202771098676429
549	0.000223690779327494
550	0.000272682501868031
551	0.000268055927588099
552	0.000377394772302909
553	0.000339700575567966
554	0.000422736417441636
555	0.000345586427938664
556	0.000376985421664684
557	0.000317898943670286
558	0.000331748958864881
559	0.000315431393902393
560	0.000318024259286123
561	0.000337849265121132
562	0.000346924923645786
563	0.000360594220112104
564	0.000363311018133025
565	0.000407224959955624
566	0.000403993531714019
567	0.000457632337435185
568	0.000451350613435145
569	0.000488873179975204
570	0.000486950886771206
571	0.000512877245249751
572	0.000510124752308393
573	0.000584222262360068
574	0.000563998387652337
575	0.000619859910374627
576	0.000620434076078855
577	0.000643658006486947
578	0.000636583595129714
579	0.000690192680038762
580	0.000691147965627773
581	0.000749473108156374
582	0.000757892318081192
583	0.000786517546888592
584	0.000831195580887797
585	0.000834582283568153
586	0.000866799486266953
587	0.000954591479176265
588	0.000952602758012437
589	0.000988988552336147
590	0.00107440631611377
591	0.0011037249854841
592	0.00111722278795741
593	0.00117725188578106
594	0.00122711607756942
595	0.00129593449287057
596	0.00127502835420834
597	0.00133116302163103
598	0.00139245067313012
599	0.00138555173721394
600	0.00142173433532259
601	0.0015105966145881
602	0.00152183792524852
603	0.001512970420192
604	0.00159369643755809
605	0.00155948201469806
606	0.0016506984213607
607	0.00156805809736134
608	0.0015660595920508
609	0.00160957871887967
610	0.00154757505874621
611	0.00152864008711507
612	0.00155943630229084
613	0.0014876869925446
614	0.00150823935896483
615	0.00148940767078768
616	0.00148083685443075
617	0.00144364623107124
618	0.00145342356991189
619	0.0014342952190767
620	0.00143624797958922
621	0.00143119619848609
622	0.00142328781583912
623	0.00142626866352931
624	0.00140825239410224
625	0.0014229646255028
626	0.00140731195273629
627	0.00139160470126398
628	0.00136378320148164
629	0.00136789637236932
630	0.00134544855474865
631	0.00133695979313259
632	0.00132242104844786
633	0.00133554794288763
634	0.00132807820824924
635	0.00131838971076033
636	0.00131470234950415
637	0.00132746827851047
638	0.00131345531762628
639	0.00130603991984287
640	0.00127838662419722
641	0.00127379372092203
642	0.00129342911050466
643	0.00124203014784765
644	0.00127432253824888
645	0.00125988630406902
646	0.0012709951714774
647	0.00126796239198402
648	0.001263108104013
649	0.00127881423213685
650	0.0012756964653397
651	0.00123940352438998
652	0.00125687505470044
653	0.00124881686633711
654	0.00122135146026329
655	0.00122227576435135
656	0.00122991652004137
657	0.00118282969296913
658	0.00120520349427434
659	0.00118907797757208
660	0.00116426038678963
661	0.00115996481874668
662	0.00115997920377272
663	0.00115280720438301
664	0.00116766916873225
665	0.00114720303033977
666	0.00115106566900998
667	0.00116702186579798
668	0.00116353050684582
669	0.00117312815135578
670	0.00118105148533327
671	0.00115243044262456
672	0.00116990117118131
673	0.00114389195989164
674	0.00116906165765137
675	0.00116429552426834
676	0.00116719720951797
677	0.00120709048748288
678	0.00118276578119061
679	0.00124323025708831
680	0.00118965915524147
681	0.00122556283528424
682	0.00116689040622193
683	0.00116604988365447
684	0.00109893867492347
685	0.00107118004601201
686	0.00104053521733619
687	0.00101179687044792
688	0.000973805038281464
689	0.000980658669139029
690	0.000940683639049875
691	0.000953696455521458
692	0.000902315856212023
693	0.000906428936419799
694	0.000900341882758899
695	0.00087342011230088
696	0.000876726373846576
697	0.000861670974915123
698	0.000846130838397958
699	0.000843943731881292
700	0.000838870772825328
701	0.000796612555562389
702	0.000828860161439949
703	0.000756789734911345
704	0.000746338974165896
705	0.000725806761539508
706	0.000702760504825233
707	0.000679902361289181
708	0.000673959195510456
709	0.000644952460089263
710	0.000656211206071706
711	0.000635167569476204
712	0.000632645608814984
713	0.000610829086829934
714	0.000607310062951837
715	0.000586354631491683
716	0.000574529728353152
717	0.000571389061512441
718	0.000543492223599728
719	0.000561779922023619
720	0.000535806492272123
721	0.000548963815150902
722	0.000544171929005495
723	0.000545707266682922
724	0.000534965354334852
725	0.000531338788367627
726	0.000520751044002651
727	0.000505561704546097
728	0.000487541276805653
729	0.000474824933292975
730	0.000468425437938445
731	0.00045505025085677
732	0.00045911401385562
733	0.000452756608036688
734	0.000449391913542776
735	0.000446787898807456
736	0.000437525533001369
737	0.000442382131349862
738	0.000435104016726282
739	0.000433844743010308
740	0.000431807023402416
741	0.000424971996364976
742	0.000427983597225419
743	0.000426923110988137
744	0.000421941312939533
745	0.000427443726304316
746	0.000421654930421051
747	0.000425362664863515
748	0.000418209227072343
749	0.000432388875617202
750	0.00042654849663234
751	0.000438689268767557
752	0.000458820265703124
753	0.000457293552286339
754	0.000495119178223203
755	0.000484197137685253
756	0.0005073383652857
757	0.000488745341973573
758	0.000494395174064662
759	0.000475395722370066
760	0.000476968549557861
761	0.000463082666902183
762	0.000468934612339345
763	0.000470598487578196
764	0.000481231085675445
765	0.000482374521460056
766	0.000495547341046651
767	0.000505308753336574
768	0.000515725199932118
769	0.000531167392941541
770	0.000542195291786822
771	0.000555848347927369
772	0.000563299378771617
773	0.000579415853100985
774	0.000585351371045412
775	0.000613129692877433
776	0.000612480103684848
777	0.00063844024011366
778	0.00063726158211593
779	0.000655591946208262
780	0.000652889591899469
781	0.00067379827203622
782	0.000679790145411156
783	0.000700027958582869
784	0.00071511222201894
785	0.000735029482659598
786	0.000751803667996264
787	0.000771084713572713
788	0.000785792540426906
789	0.000813842744433141
790	0.000829737431589472
791	0.00084760806522761
792	0.000881061718419938
793	0.000892753903610005
794	0.000914044770771587
795	0.000937151358081733
796	0.000960627170853548
797	0.000980204806552098
798	0.00100131408442615
799	0.00101873245310296
800	0.00104076842932299
801	0.00105033647433139
802	0.00106428497340525
803	0.00108422030572256
804	0.00109158326700129
805	0.0011030826120235
806	0.00112195803736613
807	0.00113096336289481
808	0.00114393225523969
809	0.00115054273025527
810	0.00115574299365343
811	0.00116675766280762
812	0.0011690368729436
813	0.00117157090118375
814	0.00118054625716687
815	0.0011752012371769
816	0.00118086225746227
817	0.00118035426466023
818	0.0011811124228816
819	0.00117978326981445
820	0.00118565868222408
821	0.00118460070005375
822	0.00118968569088807
823	0.00118996474246352
824	0.0011933560220113
825	0.00119505592909711
826	0.00119653697827733
827	0.00120335776415164
828	0.00120414695556641
829	0.00120876361726736
830	0.00120574067549201
831	0.00120990281450657
832	0.0012043853153689
833	0.00120658566392408
834	0.0011998203647704
835	0.00120404025970443
836	0.00120146692040815
837	0.00120124220412625
838	0.00120034682869275
839	0.00120374719241512
840	0.00120249526233841
841	0.00120311232132895
842	0.00120330990323541
843	0.00120326584002503
844	0.00120923840646583
845	0.00120225150821067
846	0.00120915264769931
847	0.00120763328082972
848	0.00120880105244138
849	0.00120925352268848
850	0.00121181163358348
851	0.0012100659174891
852	0.00121228375799857
853	0.00120540041012436
854	0.00120809775035903
855	0.00120413630433765
856	0.00120113328021667
857	0.00119948398879839
858	0.00120070424748702
859	0.00119323733127035
860	0.00119555640817151
861	0.00119274894837557
862	0.00118782348649439
863	0.00118798824766605
864	0.00118764119604602
865	0.00118686303467924
866	0.0011888555150441
867	0.001187585400297
868	0.00118792831572823
869	0.00118991195294031
870	0.0011893453235841
871	0.00118982901929163
872	0.00119065410493482
873	0.00118515292646554
874	0.0011867892632181
875	0.00118149208417256
876	0.00118187930987706
877	0.00118057164659803
878	0.00117673768271859
879	0.00118006613765188
880	0.00117280267730642
881	0.00117448520740541
882	0.0011634266780032
883	0.00115990873742466
884	0.00114731210500815
885	0.00113917593292606
886	0.00112351545517349
887	0.00111228084672826
888	0.00109954477743317
889	0.0010874534286606
890	0.0010726134320348
891	0.00106591281972836
892	0.00104979044203367
893	0.00104392461291701
894	0.00102767711207868
895	0.00101904538212677
896	0.00100993485354021
897	0.000997523760565592
898	0.000989055000379918
899	0.000979355986618914
900	0.000968017320819869
901	0.000958433406353177
902	0.000948980527261461
903	0.000932328197823031
904	0.000926486734284053
905	0.00090705999392529
906	0.000894770861533825
907	0.000882818929840235
908	0.000869550294589482
909	0.000856594798569215
910	0.000848179347595011
911	0.000833918045955934
912	0.000828011151212217
913	0.000815754423752261
914	0.000807271377942378
915	0.000795457898065752
916	0.000786789491429066
917	0.000775356352291301
918	0.000764874744943104
919	0.000757331793772904
920	0.000745158769719594
921	0.000741045359410915
922	0.000730422965345223
923	0.000725782810297121
924	0.000718611106360568
925	0.00071153165133835
926	0.000703086048563692
927	0.000695938747389501
928	0.000687046523225002
929	0.000678696883665103
930	0.000668510413241587
931	0.000661243312075493
932	0.000652722629539496
933	0.000644882100024727
934	0.000638160294565738
935	0.000631623990229571
936	0.000624185707890096
937	0.000618759668689923
938	0.000611368957612546
939	0.00060714113088266
940	0.000601917228574595
941	0.000596546023766654
942	0.000593462790007464
943	0.000588497988486578
944	0.000586038326694209
945	0.000583104401392158
946	0.000578800901874263
947	0.000576774049430357
948	0.000572368467060853
949	0.000569892928076194
950	0.000565779446487747
951	0.000565770000795619
952	0.000563069842934109
953	0.000563038014174848
954	0.000565620537011943
955	0.000562636037518875
956	0.000567304687827408
957	0.000563407307190831
958	0.000564288707357145
959	0.000559914004529385
960	0.000558085007660414
961	0.000553004483563859
962	0.000551052012651768
963	0.000546147271731174
964	0.000545980946324541
965	0.000544318972156324
966	0.00054589805536422
967	0.000545059285807357
968	0.0005482109054004
969	0.00054880264184267
970	0.000551796360466698
971	0.000554028444287754
972	0.000557473277736148
973	0.000560521188851691
974	0.000563448069614928
975	0.000568130878058237
976	0.000570366294959763
977	0.000576597015324465
978	0.00057745762654418
979	0.000583488832822572
980	0.000584187214551337
981	0.000589304683478236
982	0.000590421451162942
983	0.000595989703451652
984	0.00059915630453666
985	0.000605319694780625
986	0.000610543095293285
987	0.000618036237574064
988	0.000623384463623469
989	0.000631827067056596
990	0.000637166579642402
991	0.0006455652482541
992	0.000652509137049807
993	0.000658938346833428
994	0.000668648441921082
995	0.000674545086537666
996	0.000683465936169831
997	0.000691668642448424
998	0.000700718467301249
999	0.000707814357814007
1000	0.000717209362238774
1001	0.00072350273628043
1002	0.000731332127102748
1003	0.000737010700889508
1004	0.000743078498557759
1005	0.000749232389279621
1006	0.00075436730394194
1007	0.000760014514352048
1008	0.000766501494266593
1009	0.000772293386387496
1010	0.000777780963814653
1011	0.000783510736646799
1012	0.000788547564865426
1013	0.000793561883190695
1014	0.000798374227644611
1015	0.000802569632516819
1016	0.000806986290799323
1017	0.000810723530203558
1018	0.000814468615055034
1019	0.000818257726355621
1020	0.000821532210028698
1021	0.000824826695239961
1022	0.000828726059168711
1023	0.000831363024600386
1024	0.000835373866781412
1025	0.000837977709786423
1026	0.000841724882931358
1027	0.00084498562546572
1028	0.000848512467742856
1029	0.000852912262668157
1030	0.000856247987418689
1031	0.000860440479663829
1032	0.000862756810791411
1033	0.000866235248361475
1034	0.000867352310680395
1035	0.000869976352763866
1036	0.000870336163811659
1037	0.000872804131409766
1038	0.000873895854225709
1039	0.000875933788506766
1040	0.000877574342361866
1041	0.000880502606583846
1042	0.000882175735332983
1043	0.000884895842534727
1044	0.000887276432618395
1045	0.000889684423015699
1046	0.00089252813930009
1047	0.000894185475522733
1048	0.000896821684414971
1049	0.000898685314093508
1050	0.000900697641546844
1051	0.000902238540111045
1052	0.000904862081699022
1053	0.000905304007354578
1054	0.000907636581396003
1055	0.000907429331361684
1056	0.000909045208980593
1057	0.000908898742672063
1058	0.00090990553716156
1059	0.00091011747305784
1060	0.000911502306226238
1061	0.000911511692729653
1062	0.000912939950342006
1063	0.000913360301642744
1064	0.000913881223051295
1065	0.000914777832968718
1066	0.00091560325072334
1067	0.000916436667008106
1068	0.000917254760942542
1069	0.000918085758402451
1070	0.000918341614335256
1071	0.000919219956305091
1072	0.00091914661334431
1073	0.00091961671358088
1074	0.000919457585923096
1075	0.000918967602510367
1076	0.000918441935438513
1077	0.000917407662685082
1078	0.000916113469499019
1079	0.000914946282777825
1080	0.000912922344334172
1081	0.000911627050101615
1082	0.00090935324524896
1083	0.000907218885757014
1084	0.000904379987662263
1085	0.000901384985383596
1086	0.000897784119407478
1087	0.000894157006061517
1088	0.000889746238717266
1089	0.000885486943484213
1090	0.0008809131968591
1091	0.000876112357699557
1092	0.000870795923970243
1093	0.000866279453736358
1094	0.000860401294695324
1095	0.000855767790640133
1096	0.000849919046053184
1097	0.000844762424414779
1098	0.000839516789234711
1099	0.000833955944677777
1100	0.000828437405114174
1101	0.000823103207982585
1102	0.000817217968735744
1103	0.000811601908593991
1104	0.000806003727877113
1105	0.000799404733506917
1106	0.000793907619733195
1107	0.000786905436758241
1108	0.000780512811783592
1109	0.000774014667333125
1110	0.000767557100260762
1111	0.000760744624471885
1112	0.000754962215154462
1113	0.00074802684728737
1114	0.000742452768624319
1115	0.000735923628107696
1116	0.000730003092082817
1117	0.000723737086403712
1118	0.000717862544210276
1119	0.000711777757491654
1120	0.000705708423021957
1121	0.000700153507359197
1122	0.000693953763259764
1123	0.000688734363263776
1124	0.000682766840838769
1125	0.000677546863282115
1126	0.000671953817174724
1127	0.000666457393779499
1128	0.000660675632413079
1129	0.000655236550502014
1130	0.000649305706414677
1131	0.000643819797223134
1132	0.000637802571387542
1133	0.000632515046965977
1134	0.00062684448166017
1135	0.000621498562453644
1136	0.000616183778714046
1137	0.000611076950807118
1138	0.000605820277182928
1139	0.000601015338067758
1140	0.000596039227141982
1141	0.000591485834353027
1142	0.000587128262127194
1143	0.000582596444958063
1144	0.000578670889573759
1145	0.000574481203403708
1146	0.000570610766183325
1147	0.000566847339936028
1148	0.000562857855616202
1149	0.000559212770576028
1150	0.000555347835977851
1151	0.000551720691590972
1152	0.000548028372616143
1153	0.00054481994598434
1154	0.00054148959549898
1155	0.00053839095056689
1156	0.00053583616211165
1157	0.000532460801812093
1158	0.000530078571152717
1159	0.000526773035891825
1160	0.000523851007999199
1161	0.000520620564432285
1162	0.000517546229675468
1163	0.000514230326911306
1164	0.000511370209667076
1165	0.000508158576932891
1166	0.000505724605427979
1167	0.000503066006148658
1168	0.000501043022306386
1169	0.000498730685167276
1170	0.000497156629776787
1171	0.000495186127057395
1172	0.000493811731522454
1173	0.000492300821268734
1174	0.000491145691334592
1175	0.000490005110072013
1176	0.000488944683405863
1177	0.000488220090154143
1178	0.000487169253440849
1179	0.000486669776560224
1180	0.000485576513116896
1181	0.000485136541443615
1182	0.000484158096496916
1183	0.00048381231685334
1184	0.000483094798814789
1185	0.000483040008375511
1186	0.000482803191381172
1187	0.000483127408692579
1188	0.000483321370477226
1189	0.000484113954444548
1190	0.000484473658249756
1191	0.000485591520898861
1192	0.000486154698196605
1193	0.000487246944811759
1194	0.000488294017344845
1195	0.00048924209186023
1196	0.000490737016234882
1197	0.000491860347486954
1198	0.000493469423695998
1199	0.000495015506112341
1200	0.00049675644641391
1201	0.000498200875516493
1202	0.000500081486377796
1203	0.000501434491286527
1204	0.000503060331383303
1205	0.000504436839880784
1206	0.000505891131823527
1207	0.000507271557091148
1208	0.000508731425533429
1209	0.000510121002701703
1210	0.000511750263898258
1211	0.000513257484247099
1212	0.000514824792478817
1213	0.000516401784065197
1214	0.000518013064388396
1215	0.000519534456376438
1216	0.0005211467949363
1217	0.000522720359854314
1218	0.000524239514631229
1219	0.000525899696497841
1220	0.000527392593380586
1221	0.000529031472877003
1222	0.000530537530179517
1223	0.000532042999718365
1224	0.00053360060507312
1225	0.000534968578470607
1226	0.000536547049329738
1227	0.000537940476622222
1228	0.000539504463487076
1229	0.000541087025693884
1230	0.000542663407253066
1231	0.000544412944071056
1232	0.000545972889398167
1233	0.000547657792804044
1234	0.000549048844697734
1235	0.000550568883596246
1236	0.000551726383558918
1237	0.000553056281319112
1238	0.000554073534383871
1239	0.000555324231314849
1240	0.000556418098203345
1241	0.00055768496107211
1242	0.000558882577947377
1243	0.000560345192524135
1244	0.00056156823732453
1245	0.000563042538779232
1246	0.000564379899195944
1247	0.000565783686435341
1248	0.000567128898355515
1249	0.000568469391381104
1250	0.000569763196640139
1251	0.000571033921618436
1252	0.000572292685355633
1253	0.000573376011077543
1254	0.000574667689655659
1255	0.000575510548524626
1256	0.00057666631175506
1257	0.000577393699821937
1258	0.00057835813282656
1259	0.000579027020573319
1260	0.000579916148264756
1261	0.000580580557205853
1262	0.000581497469682394
1263	0.000582173580900409
1264	0.000583083883171288
1265	0.000583756483439028
1266	0.000584542928815282
1267	0.000585217341591706
1268	0.000585908840837998
1269	0.000586529989354078
1270	0.000587097379681089
1271	0.000587673482598825
1272	0.000588078964556802
1273	0.000588587331614847
1274	0.00058885317638214
1275	0.00058921507500633
1276	0.000589328043890401
1277	0.000589449838405321
1278	0.000589344985549171
1279	0.000589221145938152
1280	0.000588854681987476
1281	0.000588509471163102
1282	0.000587940316393196
1283	0.000587393505461291
1284	0.000586718468393439
1285	0.000585947512930665
1286	0.000585108047613991
1287	0.00058415649516035
1288	0.000583080292034307
1289	0.000581937225072352
1290	0.000580645156809549
1291	0.000579262847826432
1292	0.000577810990633022
1293	0.00057620919518442
1294	0.000574532417232734
1295	0.000572812659002448
1296	0.000570930893364951
1297	0.000569064114705426
1298	0.000567065404966954
1299	0.000565034422760431
1300	0.000562949147316537
1301	0.000560801785893599
1302	0.000558563371187787
1303	0.000556349909776145
1304	0.00055401389153311
1305	0.000551678728690099
1306	0.00054931485831016
1307	0.00054681204090497
1308	0.00054435042856479
1309	0.000541710269937933
1310	0.000539062857099872
1311	0.000536328107764634
1312	0.000533591137115315
1313	0.000530726862896808
1314	0.000527988769350285
1315	0.00052507303623837
1316	0.000522310390982778
1317	0.000519420180712228
1318	0.000516602854288091
1319	0.000513732144856399
1320	0.000510909431273511
1321	0.000508037165338379
1322	0.000505177514105449
1323	0.000502323640384114
1324	0.000499416645169374
1325	0.000496557895257458
1326	0.000493626070653545
1327	0.000490751796450941
1328	0.000487806810950269
1329	0.000484890400034881
1330	0.000481885022234203
1331	0.000478952677531615
1332	0.000475887058811813
1333	0.00047293354703663
1334	0.000469850425159018
1335	0.000466907104129947
1336	0.000463881614140619
1337	0.000460942044174631
1338	0.000457977576197783
1339	0.000455083066150898
1340	0.000452151306260647
1341	0.000449308536267273
1342	0.000446453829453079
1343	0.000443649567082653
1344	0.000440906069820245
1345	0.000438127848319103
1346	0.000435447313639968
1347	0.000432733385394195
1348	0.000430068659201393
1349	0.00042741170371335
1350	0.000424768217680566
1351	0.00042212720275439
1352	0.000419517542432882
1353	0.000416893224897791
1354	0.000414307468046773
1355	0.000411742041432461
1356	0.000409209528702785
1357	0.000406689008992199
1358	0.000404253990658224
1359	0.000401755437971598
1360	0.000399353898473081
1361	0.000396909645320502
1362	0.000394481185185827
1363	0.000392080894962814
1364	0.00038968862004939
1365	0.00038730761446261
1366	0.000384987682212625
1367	0.000382656318103209
1368	0.000380419931029767
1369	0.00037818386758313
1370	0.000376037215469653
1371	0.000373892456528898
1372	0.000371857175245645
1373	0.000369807609562127
1374	0.000367865774795364
1375	0.000365932294298367
1376	0.000364076522188493
1377	0.000362252841443198
1378	0.000360474196890343
1379	0.000358759507718318
1380	0.000357050605206981
1381	0.000355415918019146
1382	0.000353769294264772
1383	0.000352202562820482
1384	0.000350626124699728
1385	0.000349146148952614
1386	0.00034766361233181
1387	0.000346296180594008
1388	0.000344941525808091
1389	0.000343703092776135
1390	0.000342469762796775
1391	0.00034136814783412
1392	0.000340234585788346
1393	0.000339245101024108
1394	0.000338224473589136
1395	0.000337298904409442
1396	0.000336417074828421
1397	0.000335552718846045
1398	0.000334782224082945
1399	0.000334016809027218
1400	0.00033332877514005
1401	0.000332667805286702
1402	0.000332061147941781
1403	0.000331444123639136
1404	0.000330909193753435
1405	0.000330333597243339
1406	0.000329820437574843
1407	0.000329301241634524
1408	0.000328827258898851
1409	0.000328354389411486
1410	0.000327943592085272
1411	0.000327527268761686
1412	0.000327181873699995
1413	0.000326836407569767
1414	0.00032653638025358
1415	0.000326255428352192
1416	0.000326014544587995
1417	0.000325786918547448
1418	0.000325596358552289
1419	0.000325436554096525
1420	0.000325283222569638
1421	0.000325184484247376
1422	0.000325076133555149
1423	0.000325009871132348
1424	0.000324945040844988
1425	0.00032489269475408
1426	0.000324862536147382
1427	0.000324827353378074
1428	0.000324827433316802
1429	0.000324832690777671
1430	0.000324863037085823
1431	0.000324927109565903
1432	0.000324994697682448
1433	0.000325102766854938
1434	0.00032519866540316
1435	0.000325318757515481
1436	0.00032541827689182
1437	0.000325537970901122
1438	0.000325629913035629
1439	0.000325746072814331
1440	0.000325844990235495
1441	0.000325973848486408
1442	0.000326097797471782
1443	0.000326256505884186
1444	0.000326413953409254
1445	0.000326619903680653
1446	0.000326802152300361
1447	0.000327030046710724
1448	0.000327243356757929
1449	0.000327477972347887
1450	0.00032770368696536
1451	0.000327946687802553
1452	0.00032817794822745
1453	0.000328414486174432
1454	0.000328653552750689
1455	0.000328863204046812
1456	0.0003291006340142
1457	0.000329282662407651
1458	0.000329495591747239
1459	0.000329664642062757
1460	0.00032985494015446
1461	0.000330014931795196
1462	0.000330203915322758
1463	0.000330361246705037
1464	0.000330557194482527
1465	0.000330717406588206
1466	0.000330911421140986
1467	0.00033106402368897
1468	0.000331238274918739
1469	0.000331378222466079
1470	0.000331520804186211
1471	0.000331641278563035
1472	0.000331747892423484
1473	0.000331847296436256
1474	0.000331916294997417
1475	0.000331988467744594
1476	0.000332017257591543
1477	0.00033204631323662
1478	0.000332024170399991
1479	0.000331992662814392
1480	0.000331906428307877
1481	0.000331808207905664
1482	0.000331653037979449
1483	0.000331488075138667
1484	0.000331274009307992
1485	0.0003310461973798
1486	0.000330783649953481
1487	0.000330496361416562
1488	0.000330178181692335
1489	0.000329837178979057
1490	0.000329455006648558
1491	0.000329051812565045
1492	0.000328610567567787
1493	0.0003281353891323
1494	0.000327637260412224
1495	0.00032709554457524
1496	0.000326532091641529
1497	0.000325933757925626
1498	0.000325304619117497
1499	0.000324644738447969
1500	0.000323956229734408
1501	0.000323235326435621
1502	0.000322488502921895
1503	0.000321715734192576
1504	0.000320912402236581
1505	0.0003200936094457
1506	0.000319247049594989
1507	0.000318379218134891
1508	0.000317493772554544
1509	0.000316575334243905
1510	0.000315639269440075
1511	0.000314668268081999
1512	0.000313674985817892
1513	0.000312650578557073
1514	0.000311609318065202
1515	0.000310535093308508
1516	0.000309457517865954
1517	0.000308349183345628
1518	0.000307241452852844
1519	0.000306110108144307
1520	0.000304975089923719
1521	0.00030382110212026
1522	0.000302663033601163
1523	0.000301482883324947
1524	0.000300297648743591
1525	0.000299093175875927
1526	0.000297877769675987
1527	0.000296649005325541
1528	0.00029540400933618
1529	0.000294151409586494
1530	0.000292877821575778
1531	0.000291598841451136
1532	0.000290294895738576
1533	0.000288992399212222
1534	0.000287660280872623
1535	0.000286336557736289
1536	0.000284985865189095
1537	0.000283647224902693
1538	0.000282289997340297
1539	0.000280941952591806
1540	0.000279580869486337
1541	0.000278229723121947
1542	0.000276863867660357
1543	0.000275508205691617
1544	0.000274143296661914
1545	0.000272780465949899
1546	0.000271418987710254
1547	0.000270050522676811
1548	0.000268687510357106
1549	0.000267317781607344
1550	0.000265950719417094
1551	0.000264577369482383
1552	0.000263208021989869
1553	0.000261827412835892
1554	0.000260454297455798
1555	0.000259068378789768
1556	0.000257689354224286
1557	0.000256302985023162
1558	0.000254923358988561
1559	0.000253539563606398
1560	0.000252166232957272
1561	0.000250788047804237
1562	0.000249419124776695
1563	0.00024805022645308
1564	0.000246683271625153
1565	0.000245322489791753
1566	0.000243963801037718
1567	0.000242609262263589
1568	0.000241261673222897
1569	0.000239917903239977
1570	0.000238582744443566
1571	0.00023725439967351
1572	0.00023593495202108
1573	0.000234623795807919
1574	0.000233325251952567
1575	0.000232033670257798
1576	0.000230757264875918
1577	0.000229489469268932
1578	0.000228235692085702
1579	0.00022699351569942
1580	0.000225764088200123
1581	0.000224548794714663
1582	0.000223345296451046
1583	0.000222155566367162
1584	0.000220977230350096
1585	0.000219813140759141
1586	0.000218659354708442
1587	0.000217523539638452
1588	0.000216397597080579
1589	0.000215293353380016
1590	0.000214201003964913
1591	0.000213132274128286
1592	0.000212074949503571
1593	0.000211044433375979
1594	0.000210022592230106
1595	0.000209028596541883
1596	0.000208045016276182
1597	0.000207083600681783
1598	0.000206139532426203
1599	0.000205211021516682
1600	0.000204301945000401
1601	0.000203408602204329
1602	0.000202532585932374
1603	0.000201672569633162
1604	0.000200829857705506
1605	0.000199997964531882
1606	0.000199186593808768
1607	0.000198382483986135
1608	0.000197597662190204
1609	0.000196822640488927
1610	0.000196066804204077
1611	0.000195320565387784
1612	0.000194596746007809
1613	0.000193881917398325
1614	0.000193189682884772
1615	0.00019250821475075
1616	0.000191846129750879
1617	0.000191197360034212
1618	0.0001905667614087
1619	0.000189949777463637
1620	0.000189349205132892
1621	0.00018876468459245
1622	0.000188192172069022
1623	0.000187637569029303
1624	0.000187092759382618
1625	0.0001865638156391
1626	0.000186045263207021
1627	0.000185539509590676
1628	0.000185045118987799
1629	0.000184562402448538
1630	0.00018409094908928
1631	0.000183633003557585
1632	0.000183185083234616
1633	0.000182752671130555
1634	0.00018232949725749
1635	0.000181920797949964
1636	0.000181520760497923
1637	0.000181132182867121
1638	0.000180751820664377
1639	0.000180381740778337
1640	0.00018001895943018
1641	0.000179666472663522
1642	0.00017932231135381
1643	0.000178988717584852
1644	0.000178663041145
1645	0.000178348991766536
1646	0.00017804279650776
1647	0.000177749054545713
1648	0.000177460993222883
1649	0.00017718497344551
1650	0.000176914916407807
1651	0.00017665437266357
1652	0.000176399539630406
1653	0.000176153686920266
1654	0.000175912506368904
1655	0.000175678215719167
1656	0.00017544998712544
1657	0.000175224223890662
1658	0.000175005754541157
1659	0.000174787672957952
1660	0.000174575974810719
1661	0.000174365849226713
1662	0.000174161505535992
1663	0.00017395899624513
1664	0.000173763935204007
1665	0.000173569270861398
1666	0.00017338328854209
1667	0.000173196433876457
1668	0.000173017127911519
1669	0.000172835834818203
1670	0.000172660303612592
1671	0.000172482595025034
1672	0.000172307743022789
1673	0.000172131860686325
1674	0.000171956112760732
1675	0.000171780356383306
1676	0.000171602410901648
1677	0.000171424820114788
1678	0.00017124297347559
1679	0.00017106050983976
1680	0.000170871847661377
1681	0.000170681264119614
1682	0.000170483165804869
1683	0.000170282803681335
1684	0.000170074098097741
1685	0.000169863088245748
1686	0.000169644512348833
1687	0.000169422813205771
1688	0.000169194345499402
1689	0.0001689619466758
1690	0.000168722515328832
1691	0.00016847910026902
1692	0.000168227643216583
1693	0.000167971364785317
1694	0.000167707986329642
1695	0.000167437347739597
1696	0.000167161181815829
1697	0.000166876325698966
1698	0.000166585645929371
1699	0.00016628667444992
1700	0.000165980624909148
1701	0.000165666137611009
1702	0.000165344382685947
1703	0.000165014087295265
1704	0.000164676449543825
1705	0.000164331224791638
1706	0.000163978550871141
1707	0.000163619093138801
1708	0.000163252962714227
1709	0.000162879233139659
1710	0.000162499429726597
1711	0.000162111271377987
1712	0.000161716123410413
1713	0.000161312616998422
1714	0.000160901618423279
1715	0.000160482293781066
1716	0.000160056298306184
1717	0.00015962201597577
1718	0.00015918226001707
1719	0.000158735007942866
1720	0.000158282862889893
1721	0.000157823927648263
1722	0.000157360156731043
1723	0.000156889740798753
1724	0.000156414604832851
1725	0.000155932220661568
1726	0.000155445176758421
1727	0.000154951070523311
1728	0.000154451689692153
1729	0.000153946077114625
1730	0.000153434355551728
1731	0.000152917227292995
1732	0.000152393241071038
1733	0.000151864320349553
1734	0.000151328249206505
1735	0.000150788042598484
1736	0.000150240679471956
1737	0.000149690127618582
1738	0.000149133059065897
1739	0.000148573554519823
1740	0.000148008434870198
1741	0.000147441227973063
1742	0.000146868808777953
1743	0.000146294733384872
1744	0.000145715201277022
1745	0.000145133866207667
1746	0.000144547829341642
1747	0.000143958973802251
1748	0.00014336665273188
1749	0.000142770867307451
1750	0.000142172197577596
1751	0.000141570112216072
1752	0.000140965379921932
1753	0.00014035682842111
1754	0.000139746253627879
1755	0.000139131129219577
1756	0.000138514432526529
1757	0.000137893233055426
1758	0.000137270496609687
1759	0.000136644048594111
1760	0.000136016398379714
1761	0.000135385766105535
1762	0.000134754513970294
1763	0.00013412088577702
1764	0.000133486743686412
1765	0.000132850959546076
1766	0.000132214378095142
1767	0.000131576792109682
1768	0.000130938495723696
1769	0.000130299406937378
1770	0.000129659913150418
1771	0.000129020183995607
1772	0.000128380113546021
1773	0.000127740531312664
1774	0.000127100806515877
1775	0.000126461962803004
1776	0.000125823607743434
1777	0.000125186240668294
1778	0.000124550037836105
1779	0.000123915232913369
1780	0.000123281976834662
1781	0.000122650748426684
1782	0.000122021470004495
1783	0.000121394632185907
1784	0.000120770197995288
1785	0.000120148259657024
1786	0.000119528974623141
1787	0.000118912413928219
1788	0.000118298460424114
1789	0.000117687811375325
1790	0.000117079921313048
1791	0.000116475888650301
1792	0.000115875192825109
1793	0.000115278873101744
1794	0.000114686217035782
1795	0.000114098610681171
1796	0.000113514742590993
1797	0.000112936221638869
1798	0.00011236180134552
1799	0.000111792436004492
1800	0.000111227682679375
1801	0.000110667768340248
1802	0.000110112499695002
1803	0.00010956227866695
1804	0.000109016691870211
1805	0.000108476062814314
1806	0.000107940412748825
1807	0.0001074092531183
1808	0.000106883510602211
1809	0.00010636204561048
1810	0.000105846101762861
1811	0.000105334668206912
1812	0.000104829072136841
1813	0.000104328029197214
1814	0.000103833371582619
1815	0.000103343391965875
1816	0.000102859917789806
1817	0.000102381444842654
1818	0.000101909273808948
1819	0.000101442374454135
1820	0.00010098166268776
1821	0.000100526313434005
1822	0.000100076907924904
1823	9.96331612626746e-05
1824	9.91948777082273e-05
1825	9.87624514949273e-05
1826	9.83352257040919e-05
1827	9.79137083869482e-05
1828	9.7497287517786e-05
1829	9.70864477518413e-05
1830	9.66805846475409e-05
1831	9.62802874738706e-05
1832	9.58848307524427e-05
1833	9.54951694301116e-05
1834	9.51102824794033e-05
1835	9.47312312354162e-05
1836	9.43571357700462e-05
1837	9.39887080223023e-05
1838	9.36252650146443e-05
1839	9.32671829956464e-05
1840	9.29140916700984e-05
1841	9.25661226281035e-05
1842	9.22230081254284e-05
1843	9.18849147628355e-05
1844	9.15517136623419e-05
1845	9.12234194401679e-05
1846	9.08998471773091e-05
1847	9.05811952583634e-05
1848	9.02672597915575e-05
1849	8.99581260367529e-05
1850	8.9653540242463e-05
1851	8.9353698215287e-05
1852	8.90582931855086e-05
1853	8.87674149590505e-05
1854	8.84808301121576e-05
1855	8.81986670512211e-05
1856	8.79205735497196e-05
1857	8.76466637956469e-05
1858	8.73768045408296e-05
1859	8.71106868427196e-05
1860	8.6848492106462e-05
1861	8.6589813139851e-05
1862	8.63347881634356e-05
1863	8.60832243844183e-05
1864	8.58352184433524e-05
1865	8.5590480559033e-05
1866	8.53494063768668e-05
1867	8.51113150469119e-05
1868	8.48769173274624e-05
1869	8.46452497890474e-05
1870	8.44170257962476e-05
1871	8.4191313705239e-05
1872	8.39687464927678e-05
1873	8.37484702005375e-05
1874	8.35309202133e-05
1875	8.33155654570747e-05
1876	8.31025137270749e-05
1877	8.28915103352443e-05
1878	8.26824147593382e-05
1879	8.24751891485141e-05
1880	8.22695022707886e-05
1881	8.20654344578293e-05
1882	8.18624795059047e-05
1883	8.16609135304229e-05
1884	8.14601180366535e-05
1885	8.12605686771307e-05
1886	8.10615249411856e-05
1887	8.086360692615e-05
1888	8.06661359395422e-05
1889	8.04695969661719e-05
1890	8.02733784199897e-05
1891	8.00779579425475e-05
1892	7.9882676517244e-05
1893	7.96880061349006e-05
1894	7.94933293491153e-05
1895	7.92989741470371e-05
1896	7.91046063289838e-05
1897	7.89101671954557e-05
1898	7.87157090900167e-05
1899	7.85208790559838e-05
1900	7.83258496564832e-05
1901	7.81303108631693e-05
1902	7.79343379957431e-05
1903	7.77376661606144e-05
1904	7.75404278781515e-05
1905	7.73423570472534e-05
1906	7.71436388385191e-05
1907	7.69440580169123e-05
1908	7.67437794086474e-05
1909	7.65426138417341e-05
1910	7.63407514562242e-05
1911	7.61378884268572e-05
1912	7.59342437570654e-05
1913	7.57295149678121e-05
1914	7.55237694345663e-05
1915	7.53168816824232e-05
1916	7.51088611589502e-05
1917	7.48996030247126e-05
1918	7.46892344923648e-05
1919	7.44775661763224e-05
1920	7.42648113725337e-05
1921	7.4050788887358e-05
1922	7.38356706224289e-05
1923	7.36192907881279e-05
1924	7.34017975892264e-05
1925	7.31830055447827e-05
1926	7.29630656384717e-05
1927	7.27417186062581e-05
1928	7.2519196541189e-05
1929	7.22952344475056e-05
1930	7.20699935359271e-05
1931	7.18433477487923e-05
1932	7.16153138942513e-05
1933	7.1385909022979e-05
1934	7.11550002222255e-05
1935	7.09227295873493e-05
1936	7.06889200868314e-05
1937	7.04537911994097e-05
1938	7.02171490062536e-05
1939	6.99792796589218e-05
1940	6.97399490455729e-05
1941	6.94995132353675e-05
1942	6.9257641707521e-05
1943	6.90147394736606e-05
1944	6.87704225069818e-05
1945	6.85251050291116e-05
1946	6.82783392187094e-05
1947	6.80305301723958e-05
1948	6.77813390346387e-05
1949	6.75310012890045e-05
1950	6.72793774923415e-05
1951	6.70265599841452e-05
1952	6.67725171757183e-05
1953	6.65172780890729e-05
1954	6.6260874262268e-05
1955	6.60032036334422e-05
1956	6.57444540566557e-05
1957	6.54843619984048e-05
1958	6.52232478924985e-05
1959	6.49608166599905e-05
1960	6.46974027611123e-05
1961	6.44327790324765e-05
1962	6.41672624116897e-05
1963	6.39006411240551e-05
1964	6.36332367767259e-05
1965	6.33648424328945e-05
1966	6.30957282355793e-05
1967	6.2825734699751e-05
1968	6.25550611212644e-05
1969	6.22836165608659e-05
1970	6.20115244653496e-05
1971	6.17387654338327e-05
1972	6.14653957541895e-05
1973	6.11914884820148e-05
1974	6.09170104270503e-05
1975	6.06421209283725e-05
1976	6.03667351842953e-05
1977	6.0091022113862e-05
1978	5.98149292639994e-05
1979	5.95385857075456e-05
1980	5.92619930453578e-05
1981	5.89852770354051e-05
1982	5.87084368849282e-05
1983	5.84316236642636e-05
1984	5.81548244689464e-05
1985	5.78781653901204e-05
1986	5.76016546422442e-05
1987	5.73253560514198e-05
1988	5.70493028136614e-05
1989	5.6773546684427e-05
1990	5.64980997631881e-05
1991	5.62230674792635e-05
1992	5.59484366417634e-05
1993	5.56743382829661e-05
1994	5.54007800169592e-05
1995	5.51278834320222e-05
1996	5.48556472063023e-05
1997	5.45842184527507e-05
1998	5.43135460432714e-05
1999	5.40437807129314e-05
2000	5.37748702361053e-05
2001	5.35069192914418e-05
2002	5.32399083511226e-05
2003	5.29739207725393e-05
2004	5.27089250331216e-05
2005	5.24450297858444e-05
2006	5.21822032160614e-05
2007	5.19205068594087e-05
2008	5.16599823646157e-05
2009	5.14006053063126e-05
2010	5.11424896338756e-05
2011	5.08855733175735e-05
2012	5.06299937234939e-05
2013	5.03756921386385e-05
2014	5.01228327820624e-05
2015	4.98713128977212e-05
2016	4.96213504942465e-05
2017	4.9372801524475e-05
2018	4.91258790003008e-05
2019	4.88804457087798e-05
2020	4.86366765664183e-05
2021	4.83944519773435e-05
2022	4.8153915768532e-05
2023	4.79149672288166e-05
2024	4.76777152157789e-05
2025	4.74421127969187e-05
2026	4.7208196371322e-05
2027	4.69759860849264e-05
2028	4.67454668085305e-05
2029	4.65166765845627e-05
2030	4.62895787617619e-05
2031	4.60642459463887e-05
2032	4.58405961987886e-05
2033	4.56187412377994e-05
2034	4.53985814952843e-05
2035	4.51802606489494e-05
2036	4.49636594573616e-05
2037	4.47489205376658e-05
2038	4.45359575013471e-05
2039	4.43248714216798e-05
2040	4.41155849198091e-05
2041	4.39081793164278e-05
2042	4.3702594499469e-05
2043	4.34988726384545e-05
2044	4.32969723721921e-05
2045	4.30969286256525e-05
2046	4.28987152306842e-05
2047	4.27023405586557e-05
2048	4.25077929463294e-05
2049	4.23150776112105e-05
2050	4.2124201126943e-05
2051	4.19351332544515e-05
2052	4.17479005034443e-05
2053	4.15624741304923e-05
2054	4.13788659394579e-05
2055	4.11970550971888e-05
2056	4.101704952767e-05
2057	4.08388311931512e-05
2058	4.06623969728065e-05
2059	4.04877340570266e-05
2060	4.03148381785245e-05
2061	4.01436766312976e-05
2062	3.99742495283525e-05
2063	3.98065268542391e-05
2064	3.96404931589861e-05
2065	3.94761343348545e-05
2066	3.93134389685533e-05
2067	3.91523766905894e-05
2068	3.89929641077122e-05
2069	3.88351454286412e-05
2070	3.86789565565504e-05
2071	3.85243231068053e-05
2072	3.83712749890319e-05
2073	3.82197395636248e-05
2074	3.80697401999243e-05
2075	3.79211978639975e-05
2076	3.7774127244208e-05
2077	3.76284633496503e-05
2078	3.74842035738912e-05
2079	3.7341292666826e-05
2080	3.71997152206997e-05
2081	3.70594295234563e-05
2082	3.69204078322551e-05
2083	3.6782619608214e-05
2084	3.66460132720338e-05
2085	3.65105892132678e-05
2086	3.63762749474667e-05
2087	3.6243092808606e-05
2088	3.61109590993995e-05
2089	3.59799118609996e-05
2090	3.58498682167116e-05
2091	3.57208616891855e-05
2092	3.55928044255164e-05
2093	3.54657417117434e-05
2094	3.53395715832145e-05
2095	3.52143343176421e-05
2096	3.50899426197952e-05
2097	3.49664133333722e-05
2098	3.48436820577044e-05
2099	3.47217395834036e-05
2100	3.46005483330636e-05
2101	3.44800721000612e-05
2102	3.43602913751985e-05
2103	3.42411650599052e-05
2104	3.41226752287968e-05
2105	3.40047755487258e-05
2106	3.38874631898079e-05
2107	3.37706844760195e-05
2108	3.36544521388328e-05
2109	3.35387076990062e-05
2110	3.34234717234968e-05
2111	3.33086853584793e-05
2112	3.31943699154415e-05
2113	3.30804671868485e-05
2114	3.29669893880518e-05
2115	3.28538878361754e-05
2116	3.27411548513044e-05
2117	3.26287573281828e-05
2118	3.25166848542528e-05
2119	3.24049014339233e-05
2120	3.22934081371483e-05
2121	3.21821645489094e-05
2122	3.20711744980639e-05
2123	3.19604062734067e-05
2124	3.18498540435475e-05
2125	3.17394938516025e-05
2126	3.16293177796279e-05
2127	3.15193035356698e-05
2128	3.14094407792918e-05
2129	3.12997039612185e-05
2130	3.11900912278488e-05
2131	3.10805729060128e-05
2132	3.09711451233547e-05
2133	3.08617855638093e-05
2134	3.07524852806037e-05
2135	3.06432300016237e-05
2136	3.05339988848453e-05
2137	3.04247883878967e-05
2138	3.0315577798749e-05
2139	3.020636577147e-05
2140	3.00971361987215e-05
2141	2.99878930777187e-05
2142	2.98786138063891e-05
2143	2.97693183673191e-05
2144	2.96599652592213e-05
2145	2.9550585990458e-05
2146	2.94411361730082e-05
2147	2.93316422119735e-05
[truncated: 37,455 more rows]
