# Supplementary material for: Non-coding cancer driver candidates identified with a sample- and position-specific model of the somatic mutation rate
Source: eLife journal article supplement (doi:10.7554/elife.21778), 2017-03-31
Supplement: supp [file elife-21778-supp-v2.zip › elife_poa_e21778_Figure_4_source_data_4.txt]

y	probability
0	4.53390306776821e-07
145	6.84802102606843e-10
157	7.51333954721039e-10
175	7.58666443148484e-09
177	1.34831794186895e-09
178	1.79957300544834e-09
179	1.54084496561879e-09
180	5.60035165814074e-09
181	7.56135809275155e-10
182	3.61757498158232e-09
183	1.2978822225489e-08
184	6.90347468551785e-09
185	7.51333954721039e-10
186	4.23621464144451e-08
187	3.30601305742541e-09
188	2.76650016998059e-09
189	5.2657566638535e-09
190	1.65501789550814e-09
191	5.52426049881776e-09
192	1.07464607865227e-08
193	2.85931857920831e-08
194	1.35035059650006e-08
195	2.10655077390147e-08
196	2.52604986384832e-08
197	5.66089321734388e-08
198	3.94109722493746e-08
199	5.99453769792047e-08
200	8.73284660486182e-08
201	9.24892164278903e-08
202	8.58309901855386e-08
203	1.00410187765742e-07
204	4.96326757575303e-08
205	4.38894911017542e-08
206	7.12054448053933e-08
207	7.74315804890957e-08
208	6.84508622513827e-08
209	7.61248518852204e-08
210	6.16096013039476e-08
211	4.1059094221958e-08
212	3.77954203681188e-08
213	6.21492206951368e-08
214	7.61780568841059e-08
215	5.57231256271378e-08
216	6.86128368734094e-08
217	3.51894963636563e-08
218	4.18159259071152e-08
219	6.74795017301813e-08
220	2.47304323893655e-08
221	1.34530729586615e-08
222	2.61956893979354e-08
223	8.61500885292284e-08
224	4.52257237444962e-08
225	2.20045360275438e-08
226	3.31261745793929e-08
227	3.43478004083453e-08
228	9.99528181345017e-08
229	6.04520965739683e-08
230	8.15009198743779e-08
231	2.39233657528054e-08
232	2.47660746222587e-08
233	7.70283174113605e-09
234	3.05210380999121e-08
235	3.2661730259345e-08
236	2.38643261483976e-08
237	6.62788606258763e-08
238	1.87882623615656e-08
239	1.8301509505289e-08
240	1.51858962146895e-08
241	1.9334349390849e-09
242	3.23028590864938e-09
243	2.40754730349937e-08
244	2.18395091835667e-08
245	6.14833711938604e-08
246	6.24052883225433e-08
247	1.24724246668183e-08
248	8.75468637109706e-09
249	9.70526675376308e-09
250	2.81318286575333e-08
251	1.5584897822698e-09
252	7.62659899344631e-09
253	1.25285874256558e-08
254	1.48323392469924e-09
255	1.65933440416558e-08
256	1.195077217432e-07
257	5.81680275819432e-08
258	2.62003722011905e-08
259	2.11672027955935e-08
260	2.9930903389075e-09
261	8.18247960776583e-09
262	9.1537991409333e-09
263	6.0363284058255e-09
264	2.32741086349556e-08
266	1.36406384767213e-09
267	2.49809675597795e-09
268	9.49166146362358e-09
269	1.10031086067537e-08
270	2.42312881156136e-08
271	2.97747831580305e-08
272	2.16460203578377e-09
273	2.41545724456905e-07
274	5.32634896220357e-07
275	2.26587227207638e-07
276	3.87136831576576e-07
285	1.27605580373339e-09
287	4.9813867651384e-09
288	2.52385567905842e-07
289	1.75994861409721e-07
290	5.1169897017213e-13
292	4.23228360408428e-08
293	8.77951917308098e-07
294	8.02437839941767e-07
302	1.1348170974598e-12
314	6.13506877036228e-13
320	1.14589211035135e-11
322	2.03650353298994e-12
323	2.71808055775696e-12
324	2.32729693704351e-12
325	8.45878823060133e-12
326	1.14206983322835e-12
327	5.46399628906255e-12
328	1.9603252686543e-11
329	1.04270292268573e-11
330	1.1348170974598e-12
331	6.39839151872974e-11
332	1.75656231824555e-11
333	4.1785302970702e-12
334	1.018777467817e-11
335	5.48189937133372e-12
336	1.08972650555601e-11
337	2.55120877717086e-11
338	4.44402625229782e-11
339	2.6390586688697e-11
340	5.33252111063703e-11
341	4.95935999981259e-11
342	8.67473739564884e-11
343	1.29726716206883e-10
344	9.60202267472466e-11
345	1.36485676372064e-10
346	1.48422122509679e-10
347	1.32381995802119e-10
348	1.60814360392809e-10
349	9.27737999027365e-11
350	1.75096186311732e-10
351	1.29926202608625e-10
352	1.7442317348814e-10
353	1.75361316859179e-10
354	2.36562910186051e-10
355	2.57428466617531e-10
356	1.82140691001304e-10
357	2.85106382357691e-10
358	4.9137881603021e-10
359	4.0560331887278e-10
360	3.52931248144446e-10
361	9.88414348064212e-10
362	3.00254802696532e-10
363	5.46221346831337e-10
364	6.19939484544163e-10
365	4.68147568269707e-10
366	1.03198752132734e-09
367	6.71809116190235e-10
368	1.16798877127288e-09
369	1.73654920127206e-09
370	1.42675069685658e-09
371	1.10187542197205e-09
372	3.59166489604632e-09
373	1.98498833177704e-09
374	2.25556500402241e-09
375	3.49894659530863e-09
376	3.87018614423487e-09
377	4.45572304547111e-09
378	5.26301913305079e-09
379	6.96613114456433e-09
380	7.01618132202973e-09
381	8.32484863138713e-09
382	9.42314358358670e-09
383	1.33767229415119e-08
384	1.25808984974043e-08
385	1.48547353140063e-08
386	1.82965513882868e-08
387	1.79749346754135e-08
388	1.83469298370846e-08
389	2.21420773885886e-08
390	2.00810080928986e-08
391	2.06082746814301e-08
392	2.59569243549091e-08
393	3.01116930721425e-08
394	3.36691877453041e-08
395	3.66469128722109e-08
396	4.15601581024098e-08
397	4.42533165941379e-08
398	5.05731308453263e-08
399	5.90988869803562e-08
400	6.72253484583752e-08
401	6.96784377819183e-08
402	7.79874693420927e-08
403	8.1612718338251e-08
404	8.18918223688307e-08
405	8.71744279256864e-08
406	9.02641858080387e-08
407	9.20207730654291e-08
408	9.56642615052273e-08
409	1.07030813866429e-07
410	1.06260471806106e-07
411	1.05432801352863e-07
412	1.08570435587079e-07
413	1.08814109402086e-07
414	1.15139152170382e-07
415	1.16929105543902e-07
416	1.25868473054186e-07
417	1.16791442867099e-07
418	1.12585459533633e-07
419	1.14489850278183e-07
420	1.18901393436652e-07
421	1.19668546537987e-07
422	1.19620701023918e-07
423	1.26770768989307e-07
424	1.20568177396315e-07
425	1.28050865698064e-07
426	1.28500408994034e-07
427	1.26427056482538e-07
428	1.28767303496934e-07
429	1.39249894835373e-07
430	1.41032159450472e-07
431	1.44341692031533e-07
432	1.38755333462505e-07
433	1.29147721370022e-07
434	1.22087216573265e-07
435	1.21338722503908e-07
436	1.28903073380042e-07
437	1.33770179826866e-07
438	1.32275740571967e-07
439	1.27192469874746e-07
440	1.15872363182266e-07
441	1.12013474251057e-07
442	1.29864036472203e-07
443	1.24928714181778e-07
444	1.20169371354422e-07
445	1.19584030032354e-07
446	1.25143748851884e-07
447	1.19596613794322e-07
448	1.14214053097884e-07
449	1.17776104298797e-07
450	1.09124280068582e-07
451	1.21734181434489e-07
452	1.16186475206371e-07
453	1.3065345526583e-07
454	1.19674773958279e-07
455	1.161770734918e-07
456	1.39014544694683e-07
457	1.42989773746622e-07
458	1.43296352558173e-07
459	1.63812000706722e-07
460	1.72677643117076e-07
461	1.24388329924067e-07
462	1.44421278367789e-07
463	1.16805682940015e-07
464	1.16222072435059e-07
465	1.24596621143328e-07
466	1.27941893672938e-07
467	1.41130023911766e-07
468	1.52528129881905e-07
469	1.74760420639032e-07
470	1.71745691840502e-07
471	2.1899540310048e-07
472	2.32421508033169e-07
473	2.90421653268001e-07
474	3.36188391510307e-07
475	3.56715381408203e-07
476	3.76495023603328e-07
477	3.61456399164855e-07
478	2.8203160974569e-07
479	3.52356631827847e-07
480	3.45437441009331e-07
481	2.84479875031045e-07
482	3.07658862145825e-07
483	3.06653417967363e-07
484	2.91744365626255e-07
485	2.99713729367705e-07
486	3.30324723294085e-07
487	3.46161725520972e-07
488	3.59663665354806e-07
489	4.0469677876569e-07
490	4.72340789201987e-07
491	4.54724032593344e-07
492	4.59344305144756e-07
493	5.15222299679991e-07
494	5.41634286875143e-07
495	5.38672561206761e-07
496	5.50354334301661e-07
497	5.15590503950529e-07
498	3.96386821263429e-07
499	4.37390519975318e-07
500	4.52905122908668e-07
501	4.91575751195119e-07
502	5.70515826892847e-07
503	5.35373667700456e-07
504	4.92883505122956e-07
505	3.47959721117588e-07
506	3.64978894783254e-07
507	3.90444872011684e-07
508	3.82222356008899e-07
509	3.38416390465487e-07
510	3.2915819273258e-07
511	3.4514816720214e-07
512	3.72939370249484e-07
513	3.15790722428816e-07
514	1.62773773269164e-07
515	1.59295347626338e-07
516	3.30917461459381e-07
517	3.69104427295367e-07
518	2.74938464726552e-07
519	2.94739133161114e-07
520	2.97342061720138e-07
521	3.83596430327537e-07
522	4.00269186886363e-07
523	3.42498684370503e-07
524	2.70438191774489e-07
525	1.71589974958965e-07
526	1.48517758795348e-07
527	1.26573623721945e-07
528	1.65551628543543e-07
529	2.15340997868515e-07
530	3.58458906479973e-07
531	3.27896294603463e-07
532	2.67203943408915e-07
533	1.96185874828614e-07
534	1.32279181604491e-07
535	7.9009507580133e-08
536	8.520984277623e-08
537	1.31330428704479e-07
538	2.22066614012638e-07
539	2.61507911533012e-07
540	1.6475703608524e-07
541	6.06368913792107e-08
542	6.35679978522758e-08
543	1.15974736233327e-07
544	1.85271740585277e-07
545	1.55556735541425e-07
546	1.77906633950684e-07
547	3.59090486638716e-07
548	4.91439590024627e-07
549	7.44761227679628e-07
550	8.46521852416823e-07
551	3.5658129650801e-07
552	2.68502386156387e-07
553	5.34340210750578e-08
554	2.32135941299056e-08
555	3.53225282842355e-08
556	3.70088579374467e-08
557	6.63565191832284e-08
558	6.07659228646234e-08
559	3.10659949783974e-08
560	2.49609230333448e-08
561	1.66991137542343e-07
562	4.34107360540806e-07
563	4.07411500367199e-07
564	4.05436006531384e-07
565	2.31113210429526e-07
566	5.2283603242518e-07
567	1.48180982959973e-06
568	1.41956878037295e-06
569	1.1530503656718e-06
570	6.8769490899101e-07
571	2.85018745224228e-09
572	3.32988726997226e-09
573	4.31959223465439e-09
574	4.53532009782782e-09
575	7.46087331917021e-09
576	7.73282845957201e-08
577	1.03835464596868e-07
578	4.32670685674328e-08
579	1.02446182817886e-08
580	4.16951137560081e-08
581	5.234284127999e-07
582	7.98237174691576e-07
583	3.23408420410808e-07
584	1.52579019348243e-08
585	9.68711538676859e-08
586	9.41285388521657e-07
587	1.57185381749535e-06
588	7.29608420488737e-07
589	2.17249343736474e-08
590	2.33214995164358e-08
591	2.55437182950344e-08
592	2.79614150570404e-08
593	3.03901703249375e-08
594	3.31015449255482e-08
595	3.66765622606018e-08
596	3.98296281041364e-08
597	4.30258266464497e-08
598	4.68579292046131e-08
599	5.09223169005458e-08
600	5.52786450048391e-08
601	5.96024215227194e-08
602	6.47465616747789e-08
603	6.88445834260502e-08
604	7.29533161199881e-08
605	7.78205894248574e-08
606	8.2872091964956e-08
607	8.75239929365467e-08
608	9.25790455254938e-08
609	9.8197496376594e-08
610	1.0247260963555e-07
611	1.07792252366707e-07
612	1.13046620957252e-07
613	1.17707938477583e-07
614	1.22217994639084e-07
615	1.2755033176246e-07
616	1.32561739775074e-07
617	1.37205404358006e-07
618	1.41194428712411e-07
619	1.45005209987113e-07
620	1.48563909238631e-07
621	1.52839215605379e-07
622	1.58447746843684e-07
623	1.63254012866322e-07
624	1.67457652199576e-07
625	1.71707946635094e-07
626	1.75780911955324e-07
627	1.79214276454543e-07
628	1.85244559522326e-07
629	1.89850369459124e-07
630	1.93935518356657e-07
631	1.98036374207132e-07
632	2.02251068620848e-07
633	2.04751800001902e-07
634	2.07249591726377e-07
635	2.10631310028651e-07
636	2.12669428508577e-07
637	2.16803925418089e-07
638	2.19785862735617e-07
639	2.24840620323286e-07
640	2.25568555919042e-07
641	2.25997687645815e-07
642	2.3002691099828e-07
643	2.32666420218408e-07
644	2.35962021178549e-07
645	2.39774760518249e-07
646	2.42537312750924e-07
647	2.40591878003412e-07
648	2.44548946273707e-07
649	2.46521508948438e-07
650	2.49193162948876e-07
651	2.53743315926942e-07
652	2.58211273764119e-07
653	2.62844775591826e-07
654	2.673168302887e-07
655	2.73077473312238e-07
656	2.77710076507787e-07
657	2.85373530676784e-07
658	2.90114696174901e-07
659	3.00431951463902e-07
660	3.06627852572525e-07
661	3.09549757400033e-07
662	3.14501507385773e-07
663	3.15495509219483e-07
664	3.14416970109684e-07
665	3.27675746637681e-07
666	3.37537065612571e-07
667	3.43685316607525e-07
668	3.57407826199101e-07
669	3.70363401412719e-07
670	3.84127927410626e-07
671	4.00014769947663e-07
672	4.23850688130449e-07
673	4.44840578877168e-07
674	4.67746710827396e-07
675	4.89879589549271e-07
676	5.1675938694331e-07
677	5.30724900616832e-07
678	5.42148902002107e-07
679	5.62393961658038e-07
680	5.75156224493081e-07
681	5.89460909381187e-07
682	6.12412462788951e-07
683	6.30826164490858e-07
684	6.35804091148462e-07
685	6.58955298421319e-07
686	6.82475205465091e-07
687	7.07496473247277e-07
688	7.35551928106861e-07
689	7.58288716747291e-07
690	7.84497859238005e-07
691	7.95658256285104e-07
692	8.23108760051636e-07
693	8.49973530886316e-07
694	8.72498772244878e-07
695	8.95343875796851e-07
696	9.22870537676224e-07
697	9.39066528588152e-07
698	9.52887414091026e-07
699	9.77798473903806e-07
700	9.8222585107393e-07
701	9.9828307420509e-07
702	1.03625325893834e-06
703	1.06647275855947e-06
704	1.0731191435602e-06
705	1.08100228888352e-06
706	1.06864224648957e-06
707	1.06307488904503e-06
708	1.06324359718643e-06
709	1.07529378539578e-06
710	1.07470372450763e-06
711	1.0567569876386e-06
712	1.05437911447419e-06
713	1.05732996835025e-06
714	1.04941362440333e-06
715	1.04441323628521e-06
716	1.06178519828363e-06
717	1.06229899246208e-06
718	1.07327447953751e-06
719	1.08213934012815e-06
720	1.07440975650926e-06
721	1.05892235732097e-06
722	1.06618824406357e-06
723	1.07060383072597e-06
724	1.07117178535015e-06
725	1.07650378038334e-06
726	1.04869660357298e-06
727	1.02943291571216e-06
728	9.97685462329977e-07
729	1.01693155143777e-06
730	1.05641249420873e-06
731	1.07038291734067e-06
732	1.07046707771153e-06
733	1.04791611818082e-06
734	1.01120000305625e-06
735	1.01334769041312e-06
736	1.01755438469034e-06
737	9.56361040835001e-07
738	9.48706784946904e-07
739	9.52590068376623e-07
740	9.53670216106482e-07
741	9.43195807956785e-07
742	9.38373040236411e-07
743	9.38977684263744e-07
744	9.71172052515789e-07
745	1.03467860863206e-06
746	1.08869282443635e-06
747	1.16270139232083e-06
748	1.19077199242149e-06
749	1.24893864322474e-06
750	1.29509140879452e-06
751	1.26918664921401e-06
752	1.25767375546638e-06
753	1.28681006694139e-06
754	1.18505102593723e-06
755	1.14314036675785e-06
756	1.13365018723055e-06
757	1.09410090931955e-06
758	1.11732348607982e-06
759	1.1387085066161e-06
760	1.16895195254219e-06
761	1.21509852249742e-06
762	1.29653445912492e-06
763	1.3746067531361e-06
764	1.46767762727617e-06
765	1.54812762981166e-06
766	1.63746403516885e-06
767	1.77180178657952e-06
768	1.86433036445183e-06
769	1.8889559196908e-06
770	1.85763602104182e-06
771	1.70869002564484e-06
772	1.65242748651242e-06
773	1.69728569650574e-06
774	1.61254968237601e-06
775	1.64924889488606e-06
776	1.72335168111283e-06
777	1.73008941861365e-06
778	1.71348077372375e-06
779	1.64367845322247e-06
780	1.63520123221871e-06
781	1.61614049638342e-06
782	1.67548877689389e-06
783	1.75982120170264e-06
784	1.78810077729208e-06
785	1.76688262391754e-06
786	1.79921884715689e-06
787	1.80616545535314e-06
788	1.73695695314414e-06
789	1.72952285232221e-06
790	1.76398900962156e-06
791	1.65470773341075e-06
792	1.60503554806758e-06
793	1.61735564400112e-06
794	1.64827650467439e-06
795	1.83771137348987e-06
796	1.87869070196424e-06
797	1.75775994431265e-06
798	1.48875778325199e-06
799	1.27959777891598e-06
800	1.26388230780975e-06
801	1.21825512545474e-06
802	1.13367390921337e-06
803	1.11888125501135e-06
804	1.2746633143693e-06
805	1.39146817482962e-06
806	1.3460302959145e-06
807	1.04739133624487e-06
808	8.26842529295785e-07
809	9.38410440687146e-07
810	1.11563378767107e-06
811	1.07379922846335e-06
812	1.05705969132792e-06
813	1.08810210123355e-06
814	1.11934499993417e-06
815	1.13133666264679e-06
816	1.04313000869401e-06
817	9.49057501830237e-07
818	8.90662532698756e-07
819	8.30699530460998e-07
820	8.29813364717856e-07
821	8.9359899320717e-07
822	1.08804965784926e-06
823	1.474825320487e-06
824	1.60903113505167e-06
825	1.41782561928707e-06
826	1.18577422108027e-06
827	8.06921482667202e-07
828	5.97243000370603e-07
829	4.4697836882043e-07
830	4.85922401259572e-07
831	6.59294787708881e-07
832	8.05793756862718e-07
833	7.45304928184954e-07
834	5.72289049481032e-07
835	6.1253757642547e-07
836	8.44828028344584e-07
837	1.12958248019571e-06
838	1.28379065565714e-06
839	1.14830417790472e-06
840	1.41116627836843e-06
841	1.89570588793768e-06
842	2.33514278549917e-06
843	2.69420827250695e-06
844	2.0400384106289e-06
845	1.20981584419004e-06
846	7.47638032220662e-07
847	3.79404388058155e-07
848	3.64014762850176e-07
849	4.23696389772738e-07
850	5.61071914602351e-07
851	6.32217691812432e-07
852	6.0015456657287e-07
853	5.34409360552788e-07
854	7.3881807671372e-07
855	1.45211094972332e-06
856	1.83690620517682e-06
857	1.72255758715865e-06
858	1.38958642526279e-06
859	1.29033641144954e-06
860	2.35005589360768e-06
861	3.13540655589048e-06
862	2.81007622789295e-06
863	2.10194117936054e-06
864	1.04957152767314e-06
865	4.6860348936907e-07
866	4.72907994717293e-07
867	4.71981527914424e-07
868	4.92041037237845e-07
869	6.47350827992758e-07
870	8.28668295162566e-07
871	7.66204143515487e-07
872	6.08319478054165e-07
873	6.18443460297505e-07
874	1.14295374757792e-06
875	1.83111890845729e-06
876	1.61863591049275e-06
877	9.19717629352053e-07
878	7.44934787851909e-07
879	1.37784444668675e-06
880	2.27738866482725e-06
881	2.10493776060758e-06
882	1.17386673559339e-06
883	7.80162510606291e-07
884	8.05240790698179e-07
885	8.32468632004696e-07
886	8.58844168145728e-07
887	8.86407522870002e-07
888	9.16404625568948e-07
889	9.46935428856375e-07
890	9.76307067131003e-07
891	1.00622513764807e-06
892	1.03590560142532e-06
893	1.06625679253151e-06
894	1.09728360049902e-06
895	1.13084914540705e-06
896	1.16444577586647e-06
897	1.19612049760138e-06
898	1.22909553124388e-06
899	1.26291758626823e-06
900	1.29570900720561e-06
901	1.32884910833859e-06
902	1.36485727127018e-06
903	1.39788258948667e-06
904	1.43138917875133e-06
905	1.4647133839376e-06
906	1.494876833909e-06
907	1.52140772490093e-06
908	1.54878288808867e-06
909	1.5765584113625e-06
910	1.60376772815886e-06
911	1.63108402111463e-06
912	1.65571358100756e-06
913	1.67999764435789e-06
914	1.70068749211517e-06
915	1.72602398763186e-06
916	1.75240833230629e-06
917	1.776301475439e-06
918	1.80097355312135e-06
919	1.8234725635058e-06
920	1.8423468096606e-06
921	1.86238084073251e-06
922	1.88523759023014e-06
923	1.90243062360778e-06
924	1.92239313669662e-06
925	1.94348062229073e-06
926	1.96289111927618e-06
927	1.98079325526061e-06
928	1.99860503652326e-06
929	2.01535181892158e-06
930	2.03446580808504e-06
931	2.05762111158229e-06
932	2.08222683023054e-06
933	2.10388339347635e-06
934	2.11296838191083e-06
935	2.12481316025003e-06
936	2.13693011459163e-06
937	2.14525172132104e-06
938	2.15875284051611e-06
939	2.17655457080932e-06
940	2.18553443186804e-06
941	2.2012743628046e-06
942	2.22326330607679e-06
943	2.24376035839948e-06
944	2.27185330987262e-06
945	2.30579511231106e-06
946	2.34502502969032e-06
947	2.38501324290956e-06
948	2.4297796469428e-06
949	2.47162734818126e-06
950	2.51261112709934e-06
951	2.54477138555087e-06
952	2.5802376104938e-06
953	2.61770396390094e-06
954	2.64510075786606e-06
955	2.67359358877879e-06
956	2.69796737092963e-06
957	2.71678363970743e-06
958	2.752807931428e-06
959	2.80597787126325e-06
960	2.85004036812383e-06
961	2.90571443366442e-06
962	2.96644520953982e-06
963	3.02649147509598e-06
964	3.08955841270688e-06
965	3.15452017759693e-06
966	3.22785429093192e-06
967	3.29654303001007e-06
968	3.37101838774938e-06
969	3.44757667954864e-06
970	3.51341223218632e-06
971	3.55902950402354e-06
972	3.61132587556584e-06
973	3.66369192191132e-06
974	3.70919014527679e-06
975	3.7786133702396e-06
976	3.85269666854772e-06
977	3.9051131843621e-06
978	3.95664264203207e-06
979	4.00957469019184e-06
980	4.048413563874e-06
981	4.0963980893345e-06
982	4.13637538387561e-06
983	4.17947301273885e-06
984	4.20729948071457e-06
985	4.23473466835159e-06
986	4.27769636767797e-06
987	4.31331387983079e-06
988	4.34300561990949e-06
989	4.38215498620156e-06
990	4.4270476519348e-06
991	4.46407148855001e-06
992	4.51240217118191e-06
993	4.53485548903082e-06
994	4.5401925130462e-06
995	4.57414510091482e-06
996	4.6225910828366e-06
997	4.64048367323089e-06
998	4.64216448134905e-06
999	4.61305883738717e-06
1000	4.56139626465347e-06
1001	4.52678588813212e-06
1002	4.50354844516649e-06
1003	4.50791778138736e-06
1004	4.49860880539584e-06
1005	4.49611194057971e-06
1006	4.49908448662043e-06
1007	4.46647130645361e-06
1008	4.4173763422874e-06
1009	4.39744406637797e-06
1010	4.37437082927919e-06
1011	4.34589248225712e-06
1012	4.34101482880871e-06
1013	4.31334575439212e-06
1014	4.27196183684297e-06
1015	4.23409924605503e-06
1016	4.2064650701628e-06
1017	4.19219576040647e-06
1018	4.22122804540878e-06
1019	4.2467657086136e-06
1020	4.25907240759209e-06
1021	4.26305586879584e-06
1022	4.28286924378041e-06
1023	4.37903672952809e-06
1024	4.44283418068398e-06
1025	4.43433094430009e-06
1026	4.38562511359994e-06
1027	4.28981527449393e-06
1028	4.19474783724103e-06
1029	4.15091638302535e-06
1030	4.03512774458756e-06
1031	3.94663406495336e-06
1032	3.95519103414807e-06
1033	3.97633982810227e-06
1034	3.99802259418158e-06
1035	4.01572783401856e-06
1036	4.05577026536464e-06
1037	4.14611243511385e-06
1038	4.30881939831233e-06
1039	4.47660420808496e-06
1040	4.65111267323582e-06
1041	4.80890977222976e-06
1042	4.91408315810786e-06
1043	4.98803101958129e-06
1044	4.95023344873357e-06
1045	4.83202088459803e-06
1046	4.78257833011348e-06
1047	4.66693752957918e-06
1048	4.52273196144207e-06
1049	4.51303548857903e-06
1050	4.51214743857979e-06
1051	4.55867029810628e-06
1052	4.61296034387554e-06
1053	4.62219977554476e-06
1054	4.64757840769964e-06
1055	4.71985151436067e-06
1056	4.86620308792784e-06
1057	5.00997193598001e-06
1058	5.13658702604863e-06
1059	5.23795583639535e-06
1060	5.3805297171512e-06
1061	5.51475824568632e-06
1062	5.53787841347137e-06
1063	5.47911855443591e-06
1064	5.32062565951163e-06
1065	5.15943188793709e-06
1066	5.14115278248569e-06
1067	5.07368658757703e-06
1068	5.07142940364726e-06
1069	5.22450236429092e-06
1070	5.31325551703038e-06
1071	5.29101519442256e-06
1072	5.09367648282204e-06
1073	4.87470786735788e-06
1074	4.73067024445619e-06
1075	4.66470222419541e-06
1076	4.69312534511709e-06
1077	4.74474068254935e-06
1078	4.81227316406089e-06
1079	4.88167165979693e-06
1080	4.89555146048033e-06
1081	4.73214876768291e-06
1082	4.56952408251809e-06
1083	4.57487036905176e-06
1084	4.56728728144745e-06
1085	4.49490607285081e-06
1086	4.46180837106015e-06
1087	4.44765856018635e-06
1088	4.60118868139081e-06
1089	4.73979862431992e-06
1090	4.61223868270649e-06
1091	4.28954855954786e-06
1092	3.96325514079858e-06
1093	3.83564488284412e-06
1094	3.80289360923873e-06
1095	3.69934770541691e-06
1096	3.70415377794631e-06
1097	4.00004514847138e-06
1098	4.36052804205484e-06
1099	4.45909703857985e-06
1100	4.11622430016403e-06
1101	3.57523573053234e-06
1102	3.33245225454432e-06
1103	3.35542870259241e-06
1104	3.39794990390988e-06
1105	3.41408204346905e-06
1106	3.51508697623959e-06
1107	3.58282983294505e-06
1108	3.58184387901009e-06
1109	3.54177281501537e-06
1110	3.55384717981545e-06
1111	3.73256950679885e-06
1112	3.88703743077836e-06
1113	3.93425895022255e-06
1114	4.05846814207956e-06
1115	4.31123973805093e-06
1116	4.88683010410086e-06
1117	5.34561433586145e-06
1118	5.16450496983621e-06
1119	4.66412262379126e-06
1120	3.93379652513611e-06
1121	3.26209274057214e-06
1122	2.88732338361614e-06
1123	2.79087208396813e-06
1124	3.05086070836635e-06
1125	3.39849558257851e-06
1126	3.54817199022327e-06
1127	3.43250376402601e-06
1128	3.50858614855245e-06
1129	4.02275503189703e-06
1130	4.68445069189412e-06
1131	5.19225196554634e-06
1132	5.12523387568363e-06
1133	5.03322878624502e-06
1134	5.55030616173742e-06
1135	6.21225169990231e-06
1136	6.74242702952733e-06
1137	6.39371807167615e-06
1138	5.15182555140947e-06
1139	4.10665092096014e-06
1140	3.42962638055128e-06
1141	3.13780150414448e-06
1142	3.23876498269091e-06
1143	3.56050309187743e-06
1144	3.88679678794013e-06
1145	3.97350247502616e-06
1146	3.88220639534811e-06
1147	3.98096044811687e-06
1148	4.80224469373387e-06
1149	5.79152800796038e-06
1150	6.01589188654228e-06
1151	5.59698428924853e-06
1152	5.12458030371217e-06
1153	5.57390555149028e-06
1154	6.66704784545294e-06
1155	6.94631432949343e-06
1156	6.3159591497778e-06
1157	5.27092101758076e-06
1158	4.36129883784545e-06
1159	4.08086174962299e-06
1160	4.11107960097355e-06
1161	4.17027348295137e-06
1162	4.39418950541516e-06
1163	4.75538803220432e-06
1164	4.89838441433345e-06
1165	4.73909224797095e-06
1166	4.65862256590292e-06
1167	5.07025884280803e-06
1168	5.88190574465848e-06
1169	6.19534719798395e-06
1170	5.67859252742928e-06
1171	5.22213507210291e-06
1172	5.50657099130256e-06
1173	6.29316286222005e-06
1174	6.66177674253687e-06
1175	6.20344753404926e-06
1176	5.68103971695422e-06
1177	5.59837207759329e-06
1178	5.70276820260772e-06
1179	5.80486004814061e-06
1180	5.90428362586584e-06
1181	6.00479135676759e-06
1182	6.10647208022672e-06
1183	6.20632973641782e-06
1184	6.30532675426579e-06
1185	6.4029332442719e-06
1186	6.49898441108675e-06
1187	6.5955350647446e-06
1188	6.69329512310573e-06
1189	6.79439792119695e-06
1190	6.8927503504838e-06
1191	6.99077901358513e-06
1192	7.08967477796007e-06
1193	7.18495741494358e-06
1194	7.27704180471105e-06
1195	7.36998564792686e-06
1196	7.46035479433023e-06
1197	7.54690196693285e-06
1198	7.63463517828364e-06
1199	7.71691143900048e-06
1200	7.79179356310378e-06
1201	7.86265910458893e-06
1202	7.93263695257834e-06
1203	8.00256298414613e-06
1204	8.07473785379791e-06
1205	8.14605396198534e-06
1206	8.21461242571006e-06
1207	8.27510530341381e-06
1208	8.32955072417589e-06
1209	8.38602471297869e-06
1210	8.43674085754039e-06
1211	8.48518629729827e-06
1212	8.53349702201668e-06
1213	8.57629265030671e-06
1214	8.61693508345082e-06
1215	8.66370030647894e-06
1216	8.70703562214089e-06
1217	8.75106208797611e-06
1218	8.80452478722164e-06
1219	8.86279482895354e-06
1220	8.92461440024776e-06
1221	8.98698051638604e-06
1222	9.04718813925653e-06
1223	9.10532487113824e-06
1224	9.16719656230038e-06
1225	9.22851442481118e-06
1226	9.28696497771295e-06
1227	9.32853827169705e-06
1228	9.35806057797683e-06
1229	9.38770187882352e-06
1230	9.41068603819342e-06
1231	9.43814417555197e-06
1232	9.4819658863659e-06
1233	9.52933690628722e-06
1234	9.58158398700108e-06
1235	9.65063177687141e-06
1236	9.72288507189773e-06
1237	9.80337136780835e-06
1238	9.89483309642813e-06
1239	9.99452644801085e-06
1240	1.01007084571167e-05
1241	1.02115797030413e-05
1242	1.03252113950629e-05
1243	1.04298552201948e-05
1244	1.0518089257824e-05
1245	1.0594752021124e-05
1246	1.06772148498377e-05
1247	1.07552877375984e-05
1248	1.08316541370949e-05
1249	1.09119659639154e-05
1250	1.09859048839357e-05
1251	1.10707862096236e-05
1252	1.11776764447787e-05
1253	1.12793948128065e-05
1254	1.13779372795786e-05
1255	1.14849292304325e-05
1256	1.15882055374887e-05
1257	1.16942028178109e-05
1258	1.17945656631435e-05
1259	1.18991034669506e-05
1260	1.20059791758578e-05
1261	1.21140327794964e-05
1262	1.22284752391836e-05
1263	1.23388823282701e-05
1264	1.24319203605213e-05
1265	1.25184784881357e-05
1266	1.2609500729167e-05
1267	1.26861281686288e-05
1268	1.2773088353003e-05
1269	1.28795994785693e-05
1270	1.29686880599924e-05
1271	1.30347449797509e-05
1272	1.30850655122906e-05
1273	1.31019759828382e-05
1274	1.31093666108185e-05
1275	1.31159825000432e-05
1276	1.31218259079185e-05
1277	1.31345656089355e-05
1278	1.31457217960506e-05
1279	1.31784685621117e-05
1280	1.32095442297117e-05
1281	1.32134224778947e-05
1282	1.32075853454089e-05
1283	1.32124596460487e-05
1284	1.32229025961742e-05
1285	1.32430879520746e-05
1286	1.32485655398324e-05
1287	1.32138342409795e-05
1288	1.31820961460442e-05
1289	1.31705444912007e-05
1290	1.31488708133269e-05
1291	1.31138201627308e-05
1292	1.30691017837919e-05
1293	1.3003020944957e-05
1294	1.29468858575125e-05
1295	1.29033556519177e-05
1296	1.28903384076921e-05
1297	1.29064028361839e-05
1298	1.29122573694064e-05
1299	1.29049997135047e-05
1300	1.28378089165011e-05
1301	1.27010762330271e-05
1302	1.25648370388759e-05
1303	1.24397117764032e-05
1304	1.23029514077604e-05
1305	1.22119482109699e-05
1306	1.21542061567878e-05
1307	1.21023169605327e-05
1308	1.20575185120467e-05
1309	1.2010493455026e-05
1310	1.19893620901072e-05
1311	1.20487383508929e-05
1312	1.21761384387477e-05
1313	1.23046844532593e-05
1314	1.24185206906268e-05
1315	1.25126989856066e-05
1316	1.2635560494931e-05
1317	1.27499566537065e-05
1318	1.27342551052473e-05
1319	1.261432985278e-05
1320	1.24420638641248e-05
1321	1.22352458069727e-05
1322	1.20809873899555e-05
1323	1.19357890600656e-05
1324	1.17991238222357e-05
1325	1.17982201713344e-05
1326	1.18750976276489e-05
1327	1.1952829532558e-05
1328	1.20158721019108e-05
1329	1.20916262330662e-05
1330	1.22314234269012e-05
1331	1.24511173908457e-05
1332	1.2710154063625e-05
1333	1.29560282298919e-05
1334	1.31992508714955e-05
1335	1.33779761354464e-05
1336	1.34571284933558e-05
1337	1.34173460795357e-05
1338	1.32453439171885e-05
1339	1.30858060965308e-05
1340	1.29489812579317e-05
1341	1.27706258233711e-05
1342	1.27097055289351e-05
1343	1.27655402642963e-05
1344	1.28736191885405e-05
1345	1.29789161022696e-05
1346	1.29662553666239e-05
1347	1.28868773420719e-05
1348	1.28354337558745e-05
1349	1.28886524876576e-05
1350	1.30136677949317e-05
1351	1.31424155848113e-05
1352	1.32708858972992e-05
1353	1.34217323207527e-05
1354	1.35776606650415e-05
1355	1.36083014360005e-05
1356	1.35168301254338e-05
1357	1.33668341270369e-05
1358	1.32043852142032e-05
1359	1.31306989740938e-05
1360	1.30710204998494e-05
1361	1.30218126866418e-05
1362	1.31428635117382e-05
1363	1.32993312290681e-05
1364	1.33153761449932e-05
1365	1.31109011844874e-05
1366	1.27700329809643e-05
1367	1.24968276012552e-05
1368	1.23357886529154e-05
1369	1.22702946499578e-05
1370	1.2316821734934e-05
1371	1.24950154479761e-05
1372	1.27510118672442e-05
1373	1.29188345914118e-05
1374	1.28075190087777e-05
1375	1.2497608520972e-05
1376	1.22914662024708e-05
1377	1.22323826179536e-05
1378	1.21906074672642e-05
1379	1.21557302235393e-05
1380	1.21676102647107e-05
1381	1.22929139762687e-05
1382	1.24904248005132e-05
1383	1.25043322552126e-05
1384	1.23195874634378e-05
1385	1.21524674638947e-05
1386	1.21467726934526e-05
1387	1.22580708309086e-05
1388	1.22932045388863e-05
1389	1.23290728174285e-05
1390	1.26767224480975e-05
1391	1.32183239719828e-05
1392	1.35537536520794e-05
1393	1.33636879746973e-05
1394	1.26877083488574e-05
1395	1.20326956890387e-05
1396	1.16863003453078e-05
1397	1.16040110447099e-05
1398	1.17156574911571e-05
1399	1.19860679267631e-05
1400	1.22845956149844e-05
1401	1.24484606443686e-05
1402	1.25643453928203e-05
1403	1.27988098861366e-05
1404	1.33061075430045e-05
1405	1.39029964405556e-05
1406	1.42182651089836e-05
1407	1.43679642556051e-05
1408	1.45818538008656e-05
1409	1.50669700692395e-05
1410	1.56928939140016e-05
1411	1.5776829745477e-05
1412	1.52315366108421e-05
1413	1.4336623994613e-05
1414	1.33420150465192e-05
1415	1.26455200402935e-05
1416	1.24117976776407e-05
1417	1.26868083634963e-05
1418	1.32802799600999e-05
1419	1.37775803151279e-05
1420	1.39313155026225e-05
1421	1.40443904125546e-05
1422	1.46499301483906e-05
1423	1.56432107885359e-05
1424	1.65482464110572e-05
1425	1.68375027850763e-05
1426	1.658358936854e-05
1427	1.66555114237924e-05
1428	1.72268937813331e-05
1429	1.78324081138084e-05
1430	1.78877847249221e-05
1431	1.69974064399201e-05
1432	1.57747330914361e-05
1433	1.48761256865305e-05
1434	1.43964502222597e-05
1435	1.43887180589255e-05
1436	1.48193557560701e-05
1437	1.5436772061595e-05
1438	1.58464611820957e-05
1439	1.59061073233186e-05
1440	1.59290452628314e-05
1441	1.65154200812055e-05
1442	1.76626095869718e-05
1443	1.84467700806955e-05
1444	1.8373806840111e-05
1445	1.78662449997973e-05
1446	1.7775258060303e-05
1447	1.84878172969566e-05
1448	1.91788004389338e-05
1449	1.909568932185e-05
1450	1.84308866377172e-05
1451	1.76865862327527e-05
1452	1.73028558977196e-05
1453	1.73049285289515e-05
1454	1.74491318911742e-05
1455	1.77314673037855e-05
1456	1.82014173901037e-05
1457	1.86025963674948e-05
1458	1.86796235206979e-05
1459	1.86318846165904e-05
1460	1.88976635486008e-05
1461	1.95962480657461e-05
1462	2.02198853324098e-05
1463	2.02228633302972e-05
1464	1.98979167112647e-05
1465	1.99357209494853e-05
1466	2.04760780847663e-05
1467	2.10287294253377e-05
1468	2.11104266086853e-05
1469	2.08818332065682e-05
1470	2.08019067494147e-05
1471	2.09475903077874e-05
1472	2.11544549656951e-05
1473	2.13522357161407e-05
1474	2.15444477204745e-05
1475	2.17338226122227e-05
1476	2.19198915467685e-05
1477	2.21034184791239e-05
1478	2.22848800872043e-05
1479	2.24628591081736e-05
1480	2.2637998593804e-05
1481	2.28090066738516e-05
1482	2.29775552978569e-05
1483	2.31416345221175e-05
1484	2.32988045065536e-05
1485	2.34535220600942e-05
1486	2.36024634233672e-05
1487	2.37431304891983e-05
1488	2.38797067066864e-05
1489	2.40126497337697e-05
1490	2.41394166011891e-05
1491	2.42664937385399e-05
1492	2.43933962688126e-05
1493	2.45151910720722e-05
1494	2.4632968262363e-05
1495	2.47470419372632e-05
1496	2.48583399309079e-05
1497	2.49699098253464e-05
1498	2.50811422553879e-05
1499	2.51868725956305e-05
1500	2.52806466333321e-05
1501	2.5355923388988e-05
1502	2.54208334974732e-05
1503	2.54772395043434e-05
1504	2.55247290387949e-05
1505	2.55731622000583e-05
1506	2.56235376509386e-05
1507	2.56761066282749e-05
1508	2.57393248390399e-05
1509	2.58091286988745e-05
1510	2.58802147695628e-05
1511	2.59634279012414e-05
1512	2.60603761496213e-05
1513	2.61683055708423e-05
1514	2.62825142709813e-05
1515	2.63953187700911e-05
1516	2.65018895813949e-05
1517	2.66027643715559e-05
1518	2.66965583476166e-05
1519	2.67812054569749e-05
1520	2.68528217011756e-05
1521	2.69076258709808e-05
1522	2.69582198958211e-05
1523	2.70064715451386e-05
1524	2.70563638079095e-05
1525	2.7126330699849e-05
1526	2.72136833878483e-05
1527	2.73086210989831e-05
1528	2.74177719318122e-05
1529	2.75355764697547e-05
1530	2.76580017714625e-05
1531	2.77897260112897e-05
1532	2.79259432128689e-05
1533	2.80685002910047e-05
1534	2.82176425397984e-05
1535	2.83736675792917e-05
1536	2.85260007371933e-05
1537	2.865944032405e-05
1538	2.87724208848818e-05
1539	2.88829133349993e-05
1540	2.89975963502699e-05
1541	2.9110221733188e-05
1542	2.92274425026579e-05
1543	2.93429696736874e-05
1544	2.94572845190868e-05
1545	2.95812937003616e-05
1546	2.96954364979156e-05
1547	2.97866951583379e-05
1548	2.98713163331232e-05
1549	2.99506945708928e-05
1550	3.00304898157127e-05
1551	3.01116008554032e-05
1552	3.01944208988015e-05
1553	3.02879565462618e-05
1554	3.0383688409752e-05
1555	3.04781279256134e-05
1556	3.05674481246362e-05
1557	3.06450688454857e-05
1558	3.0714009761759e-05
1559	3.07836041728589e-05
1560	3.08402748104088e-05
1561	3.08841482956994e-05
1562	3.09372349945041e-05
1563	3.09841976826681e-05
1564	3.10046809845489e-05
1565	3.10010013514925e-05
1566	3.09657574947058e-05
1567	3.09112243334099e-05
1568	3.08602718959043e-05
1569	3.08122646846859e-05
1570	3.07798754883051e-05
1571	3.07644077585009e-05
1572	3.07679720383855e-05
1573	3.07759797210668e-05
1574	3.07380027469897e-05
1575	3.06477860217287e-05
1576	3.0539340108554e-05
1577	3.0433842647892e-05
1578	3.03439924392402e-05
1579	3.02671066588304e-05
1580	3.01764463545801e-05
1581	3.00850521625123e-05
1582	3.00138057170595e-05
1583	2.99484332162703e-05
1584	2.98879217924257e-05
1585	2.98513629843044e-05
1586	2.98361889317216e-05
1587	2.98410425098065e-05
1588	2.98591244651651e-05
1589	2.98828492317302e-05
1590	2.99291078773837e-05
1591	2.9965081084291e-05
1592	2.99470292627619e-05
1593	2.98491075331648e-05
1594	2.96503637398712e-05
1595	2.9405446443879e-05
1596	2.9173809327497e-05
1597	2.8948300577177e-05
1598	2.87755550482592e-05
1599	2.87016176383377e-05
1600	2.86980527782407e-05
1601	2.87307754879466e-05
1602	2.87610805972561e-05
1603	2.87962857616952e-05
1604	2.89027770209442e-05
1605	2.91132933660662e-05
1606	2.93702441751813e-05
1607	2.96139791850627e-05
1608	2.98260743418423e-05
1609	3.00077584556155e-05
1610	3.01556080176794e-05
1611	3.01791925568757e-05
1612	3.00459603265561e-05
1613	2.98413643618741e-05
1614	2.96116274245611e-05
1615	2.94133018137921e-05
1616	2.92780998373858e-05
1617	2.91899802158326e-05
1618	2.92239497223513e-05
1619	2.93756435519259e-05
1620	2.95369160841325e-05
1621	2.96542867427718e-05
1622	2.97475866201125e-05
1623	2.98855481769447e-05
1624	3.0101645801967e-05
1625	3.03773481633785e-05
1626	3.06660425712528e-05
1627	3.09567900085537e-05
1628	3.12154749415361e-05
1629	3.1360050064342e-05
1630	3.13686959172149e-05
1631	3.12503126965692e-05
1632	3.10964263470164e-05
1633	3.0984001746496e-05
1634	3.08655084736491e-05
1635	3.08007227581151e-05
1636	3.08739377273209e-05
1637	3.10417477735134e-05
1638	3.12182064397467e-05
1639	3.12683452072927e-05
1640	3.1172328370281e-05
1641	3.10470730023897e-05
1642	3.10032603898727e-05
1643	3.10702646116055e-05
1644	3.12047462627725e-05
1645	3.13921603043065e-05
1646	3.16402599033202e-05
1647	3.19046574802616e-05
1648	3.20504144611611e-05
1649	3.20146302484504e-05
1650	3.1890199113807e-05
1651	3.17695154199831e-05
1652	3.17134195616428e-05
1653	3.17015696971382e-05
1654	3.17007963858524e-05
1655	3.18126293201617e-05
1656	3.20305058366056e-05
1657	3.21762121032136e-05
1658	3.21432804545865e-05
1659	3.19704094502083e-05
1660	3.18223238078639e-05
1661	3.17878523591214e-05
1662	3.18155510955788e-05
1663	3.19151940847391e-05
1664	3.21743852796562e-05
1665	3.25933011563446e-05
1666	3.30020470596078e-05
1667	3.31295551409525e-05
1668	3.29041941666705e-05
1669	3.25691533767654e-05
1670	3.23544304564799e-05
1671	3.22833203550095e-05
1672	3.23163105550017e-05
1673	3.2466529570267e-05
1674	3.2748224368631e-05
1675	3.31110979106358e-05
1676	3.33956418061758e-05
1677	3.35362466655056e-05
1678	3.37177291182808e-05
1679	3.40662912969925e-05
1680	3.44981788416749e-05
1681	3.48218944931337e-05
1682	3.49921154099823e-05
1683	3.52901001556041e-05
1684	3.58262402050012e-05
1685	3.63043486992287e-05
1686	3.63765066171166e-05
1687	3.59017945689211e-05
1688	3.51630701672656e-05
1689	3.45707395854617e-05
1690	3.43111721021677e-05
1691	3.44388199025738e-05
1692	3.49075633919831e-05
1693	3.55294003806077e-05
1694	3.60437033076446e-05
1695	3.6420299176087e-05
1696	3.68736109948968e-05
1697	3.76078891860009e-05
1698	3.85528990137313e-05
1699	3.92735566041339e-05
1700	3.95841159184374e-05
1701	3.9730915373997e-05
1702	4.00010651645108e-05
1703	4.0487764853379e-05
1704	4.07950215594908e-05
1705	4.05443774429708e-05
1706	3.98433998891152e-05
1707	3.89412445759719e-05
1708	3.81651793459954e-05
1709	3.78248499748882e-05
1710	3.8059943296052e-05
1711	3.87737157777282e-05
1712	3.95877383448555e-05
1713	4.01155135750183e-05
1714	4.03894568471287e-05
1715	4.09008071230422e-05
1716	4.18888969030128e-05
1717	4.30036167970844e-05
1718	4.36853993674108e-05
1719	4.36863937149039e-05
1720	4.35082921383297e-05
1721	4.37241893275507e-05
1722	4.42270280613605e-05
1723	4.45460665539082e-05
1724	4.42683347915311e-05
1725	4.34976714377358e-05
1726	4.27450218400688e-05
1727	4.22950414795825e-05
1728	4.22290667372274e-05
1729	4.2611183839754e-05
1730	4.33343857478901e-05
1731	4.40375527873847e-05
1732	4.44060343936865e-05
1733	4.4532068301694e-05
1734	4.48875746640787e-05
1735	4.57746648052982e-05
1736	4.6762783446113e-05
1737	4.71937158231418e-05
1738	4.70348063612565e-05
1739	4.68430117352257e-05
1740	4.71428961034004e-05
1741	4.77778580382616e-05
1742	4.81420453261128e-05
1743	4.80263642752522e-05
1744	4.77001842564331e-05
1745	4.74946085640636e-05
1746	4.75364321829052e-05
1747	4.77407774788957e-05
1748	4.80613463178736e-05
1749	4.85378245147679e-05
1750	4.90584537413919e-05
1751	4.93864607094253e-05
1752	4.95108082354196e-05
1753	4.97170611381357e-05
1754	5.02223646006963e-05
1755	5.08519962114121e-05
1756	5.12081418643536e-05
1757	5.12179745513191e-05
1758	5.12462530014478e-05
1759	5.15707635684016e-05
1760	5.20545525095641e-05
1761	5.23829627909967e-05
1762	5.2469263346114e-05
1763	5.25103384173668e-05
1764	5.26643188791724e-05
1765	5.29002666871956e-05
1766	5.31452732392995e-05
1767	5.33802629146215e-05
1768	5.36086295577139e-05
1769	5.38308739922671e-05
1770	5.40478773138536e-05
1771	5.42604935958398e-05
1772	5.44672548092825e-05
1773	5.46664759596163e-05
1774	5.48547505991231e-05
1775	5.50294742998764e-05
1776	5.5191138677077e-05
1777	5.5338367761694e-05
1778	5.54751162205455e-05
1779	5.56052293647807e-05
1780	5.57278879781571e-05
1781	5.58466523110708e-05
1782	5.59647153632803e-05
1783	5.60800572179586e-05
1784	5.61957692059998e-05
1785	5.63165491629481e-05
1786	5.64403195857752e-05
1787	5.65656728872817e-05
1788	5.66898789464672e-05
1789	5.68090328682341e-05
1790	5.69228935098949e-05
1791	5.7031380332488e-05
1792	5.71300924572913e-05
1793	5.72132833697842e-05
1794	5.72747483938124e-05
1795	5.73167438697178e-05
1796	5.73474795164363e-05
1797	5.73692473816991e-05
1798	5.73907334294175e-05
1799	5.74217100941137e-05
1800	5.74644851485691e-05
1801	5.75235956198407e-05
1802	5.75978929103526e-05
1803	5.76785621132949e-05
1804	5.77678962718674e-05
1805	5.78710127188894e-05
1806	5.79868460997952e-05
1807	5.81126899731942e-05
1808	5.82416653091366e-05
1809	5.83669789623842e-05
1810	5.8483656810497e-05
1811	5.85878524323793e-05
1812	5.86778658226586e-05
1813	5.87565668870684e-05
1814	5.88252541270337e-05
1815	5.88898474334011e-05
1816	5.8956392972204e-05
1817	5.90249465031598e-05
1818	5.91062247522938e-05
1819	5.92048672896215e-05
1820	5.93093651325695e-05
1821	5.94166408050784e-05
1822	5.9526739289288e-05
1823	5.96374907944653e-05
1824	5.97533417941028e-05
1825	5.98727600142909e-05
1826	5.99962880433659e-05
1827	6.01293139959215e-05
1828	6.02730439967718e-05
1829	6.04208103021151e-05
1830	6.05562129036559e-05
1831	6.06703396955529e-05
1832	6.07731984040765e-05
1833	6.08782369894992e-05
1834	6.09829420610804e-05
1835	6.10857490876557e-05
1836	6.11862199152335e-05
1837	6.12791975206506e-05
1838	6.136735841369e-05
1839	6.14415599078008e-05
1840	6.1486651877401e-05
1841	6.15128893162457e-05
1842	6.15336662136136e-05
1843	6.15564155831263e-05
1844	6.15887002824225e-05
1845	6.16310403353798e-05
1846	6.16885033122158e-05
1847	6.17538525019387e-05
1848	6.18078888108342e-05
1849	6.18409060438092e-05
1850	6.18519275495507e-05
1851	6.18491961360981e-05
1852	6.18451494514143e-05
1853	6.18382380587177e-05
1854	6.18219897639624e-05
1855	6.18089244407433e-05
1856	6.18014096102969e-05
1857	6.1783311042645e-05
1858	6.17504675340864e-05
1859	6.17056578728148e-05
1860	6.16579958499708e-05
1861	6.16247815026488e-05
1862	6.16041378335186e-05
1863	6.15933886617198e-05
1864	6.15981304087382e-05
1865	6.16131917238578e-05
1866	6.16228233541552e-05
1867	6.15839356201616e-05
1868	6.14660595716869e-05
1869	6.12949205974269e-05
1870	6.11101050180612e-05
1871	6.0940732851551e-05
1872	6.08096094945508e-05
1873	6.07165784095983e-05
1874	6.06613459806822e-05
1875	6.06479988094345e-05
1876	6.06574605101677e-05
1877	6.06786959503376e-05
1878	6.07327754067009e-05
1879	6.08364909113152e-05
1880	6.09813550668838e-05
1881	6.11452925613649e-05
1882	6.13011654322892e-05
1883	6.1444942826572e-05
1884	6.15656482703734e-05
1885	6.16154675252501e-05
1886	6.15667049016756e-05
1887	6.14194399712974e-05
1888	6.12099593699215e-05
1889	6.10049743800413e-05
1890	6.08290302510302e-05
1891	6.07088809525565e-05
1892	6.07037444175918e-05
1893	6.08190984848834e-05
1894	6.10072529908622e-05
1895	6.12056873357658e-05
1896	6.13862509642531e-05
1897	6.15912001740969e-05
1898	6.18748884041158e-05
1899	6.22264691682275e-05
1900	6.25890567320609e-05
1901	6.29300208346378e-05
1902	6.32328908995326e-05
1903	6.34798706493329e-05
1904	6.36235978986259e-05
1905	6.36206142122097e-05
1906	6.35257573229333e-05
1907	6.34136763422299e-05
1908	6.33245444742826e-05
1909	6.32950745471226e-05
1910	6.33354910567742e-05
1911	6.34769710276275e-05
1912	6.37296313867198e-05
1913	6.40083941367933e-05
1914	6.42327115502217e-05
1915	6.44000253592314e-05
1916	6.45717801873149e-05
1917	6.48025119681125e-05
1918	6.5098426532277e-05
1919	6.54394079149867e-05
1920	6.58113629828948e-05
1921	6.61888837901028e-05
1922	6.64919630638087e-05
1923	6.66601662643496e-05
1924	6.67034538716452e-05
1925	6.66885942804144e-05
1926	6.66954207766095e-05
1927	6.67228546286607e-05
1928	6.67727863059841e-05
1929	6.69146073671544e-05
1930	6.71637169036171e-05
1931	6.74531130054699e-05
1932	6.76700437430402e-05
1933	6.77517993345655e-05
1934	6.77687442172402e-05
1935	6.78279446608728e-05
1936	6.79750113488659e-05
1937	6.8199115794978e-05
1938	6.84951485552151e-05
1939	6.88786641233417e-05
1940	6.93133041619735e-05
1941	6.96689397983102e-05
1942	6.98327565163178e-05
1943	6.98395321193805e-05
1944	6.98094567973006e-05
1945	6.98306848710167e-05
1946	6.99237263030996e-05
1947	7.00755602655935e-05
1948	7.0323374574258e-05
1949	7.06885903906296e-05
1950	7.10631476035701e-05
1951	7.13342173045111e-05
1952	7.15153829235656e-05
1953	7.17131377134825e-05
1954	7.20009687471521e-05
1955	7.23193179991841e-05
1956	7.26116792590974e-05
1957	7.29546078174808e-05
1958	7.34272929897324e-05
1959	7.39626502499685e-05
1960	7.43405526300614e-05
1961	7.43874603120129e-05
1962	7.41866003289881e-05
1963	7.39644429951566e-05
1964	7.38781595153385e-05
1965	7.39818832103262e-05
1966	7.42964449875823e-05
1967	7.4809761180282e-05
1968	7.54334782711089e-05
1969	7.60284856524118e-05
1970	7.65213965981646e-05
1971	7.70287896148465e-05
1972	7.76873532963181e-05
1973	7.84254013638581e-05
1974	7.90427574010754e-05
1975	7.94182386083487e-05
1976	7.96947493897639e-05
1977	8.00891850441114e-05
1978	8.05383552164121e-05
1979	8.07926126319278e-05
1980	8.06642830224973e-05
1981	8.02058777457928e-05
1982	7.96969059580781e-05
1983	7.94069182164168e-05
1984	7.95033354394036e-05
1985	8.00297740851794e-05
1986	8.08425991837667e-05
1987	8.16568385144153e-05
1988	8.23006323980114e-05
1989	8.2889640294466e-05
1990	8.36509578143542e-05
1991	8.46390159562882e-05
1992	8.55712910590339e-05
1993	8.61188249336551e-05
1994	8.63178903605205e-05
1995	8.64428529499737e-05
1996	8.67012606520721e-05
1997	8.70072519826519e-05
1998	8.70666460508826e-05
1999	8.67754777179047e-05
2000	8.6258819924099e-05
2001	8.57242742780088e-05
2002	8.54294854685013e-05
2003	8.55861628711639e-05
2004	8.62260479183563e-05
2005	8.71161067961847e-05
2006	8.78866913747919e-05
2007	8.83685067512373e-05
2008	8.8805153402157e-05
2009	8.95391115263624e-05
2010	9.05248488308508e-05
2011	9.13612935374103e-05
2012	9.17016340191813e-05
2013	9.16531975894589e-05
2014	9.16688148768303e-05
2015	9.19590840657598e-05
2016	9.23239879880767e-05
2017	9.2455751367634e-05
2018	9.22531175993878e-05
2019	9.19123223077978e-05
2020	9.16727366074329e-05
2021	9.16525506012946e-05
2022	9.19360417674313e-05
2023	9.25401208043248e-05
2024	9.32765696328528e-05
2025	9.38464805293868e-05
2026	9.41496923774814e-05
2027	9.44212072976935e-05
2028	9.49759189715424e-05
2029	9.57727270930268e-05
2030	9.640495117611e-05
2031	9.66169780980901e-05
2032	9.65976360837423e-05
2033	9.67261274424433e-05
2034	9.71322210363459e-05
2035	9.75723636448904e-05
2036	9.7791093292955e-05
2037	9.78141004101403e-05
2038	9.7822869369404e-05
2039	9.79340146962934e-05
2040	9.81448303770334e-05
2041	9.84325904474015e-05
2042	9.88187432586483e-05
2043	9.92750646426495e-05
2044	9.96672862549391e-05
2045	9.99092541706318e-05
2046	0.000100105262205848
2047	0.000100426909062675
2048	0.000100878098920489
2049	0.000101269579093677
2050	0.000101460350655239
2051	0.000101547453729939
2052	0.000101722954305824
2053	0.000102021571960389
2054	0.000102313717616658
2055	0.000102495017115509
2056	0.000102600421995638
2057	0.000102723878803847
2058	0.000102896881190989
2059	0.000103091167600745
2060	0.000103283061795648
2061	0.000103469385104367
2062	0.000103650114742885
2063	0.000103824077138325
2064	0.000103990761182338
2065	0.000104148457979194
2066	0.00010429453408635
2067	0.000104425417023604
2068	0.000104537090517256
2069	0.000104629433323173
2070	0.000104704283465584
2071	0.00010476540382314
2072	0.000104819975207398
2073	0.000104872831780814
2074	0.000104928148966936
2075	0.000104990160780909
2076	0.000105057821188931
2077	0.000105129706243847
2078	0.000105208478073101
2079	0.000105295065125249
2080	0.00010538827941846
2081	0.000105485213842485
2082	0.000105580231187909
2083	0.000105669314290092
2084	0.000105750523506657
2085	0.000105820411230475
2086	0.000105874800875663
2087	0.000105911073466383
2088	0.000105930702268185
2089	0.000105941233862285
2090	0.000105948366145394
2091	0.000105957094957251
2092	0.000105976416930685
2093	0.000106011347432467
2094	0.000106063429914841
2095	0.000106131558576297
2096	0.00010620857092787
2097	0.000106291274733581
2098	0.000106382914575267
2099	0.000106484814238707
2100	0.000106596884843369
2101	0.00010671707360738
2102	0.000106841161215925
2103	0.000106963488664799
2104	0.000107076926652614
2105	0.000107176897797595
2106	0.000107265799386811
2107	0.000107349212347205
2108	0.000107431464927348
2109	0.000107516458965167
2110	0.000107604088222154
2111	0.000107696558908515
2112	0.000107797707040228
2113	0.000107900414229737
2114	0.000107997152760186
2115	0.000108088893898052
2116	0.000108178804881362
2117	0.000108272885757113
2118	0.000108373980831089
2119	0.000108482004320063
2120	0.00010860142383887
2121	0.000108734199858393
2122	0.000108874000662247
2123	0.00010900639816208
2124	0.000109118927118786
2125	0.000109214051203615
2126	0.000109304155699035
2127	0.000109394404394846
2128	0.000109483055339206
2129	0.000109570482527498
2130	0.000109654748288627
2131	0.000109733796351053
2132	0.000109803348774809
2133	0.000109854568434067
2134	0.00010989169158583
2135	0.000109928836056523
2136	0.000109973703711782
2137	0.000110030744420173
2138	0.000110100856570488
2139	0.000110183754297503
2140	0.000110273363532101
2141	0.000110348422105367
2142	0.000110390066813723
2143	0.000110396313199828
2144	0.000110379320371208
2145	0.000110358604019245
2146	0.000110347250530793
2147	0.00011034862623437
2148	0.000110370388539804
2149	0.000110417646482632
2150	0.000110479255838265
2151	0.000110543811915777
2152	0.000110612404812767
2153	0.000110694275498336
2154	0.00011080056792506
2155	0.000110927948455046
2156	0.000111061303887553
2157	0.000111194688641221
2158	0.000111322772592677
2159	0.000111430496201132
2160	0.000111491267667562
2161	0.000111478739330798
2162	0.000111403284685737
2163	0.000111304665828443
2164	0.000111218823892043
2165	0.000111177470725522
2166	0.000111202720284252
2167	0.000111302043273524
2168	0.000111470684153712
2169	0.000111681992639833
2170	0.000111907629510468
2171	0.000112150351012133
2172	0.000112431272259183
2173	0.000112754450817544
2174	0.000113101101621684
2175	0.000113443195070829
2176	0.000113761324096489
2177	0.000114045092503035
2178	0.000114264832461358
2179	0.000114391700371733
2180	0.000114432128267241
2181	0.000114419861620587
2182	0.000114406047299328
2183	0.000114426078633075
2184	0.000114498544586302
2185	0.000114662439275358
2186	0.000114942093952863
2187	0.000115308305762704
2188	0.000115699671964074
2189	0.000116069255903334
2190	0.000116425452197329
2191	0.00011681220459962
2192	0.000117250065285918
2193	0.000117716456896447
2194	0.00011818394356685
2195	0.000118635177131199
2196	0.000119045104201791
2197	0.000119377067111848
2198	0.000119597825387243
2199	0.000119728089337173
2200	0.000119831604804404
2201	0.000119950391443509
2202	0.000120107909536862
2203	0.000120321954050779
2204	0.0001206117185315
2205	0.00012098636511859
2206	0.000121398307911748
[truncated: 23,555 more rows]
