# Supplementary material for: Non-coding cancer driver candidates identified with a sample- and position-specific model of the somatic mutation rate
Source: eLife journal article supplement (doi:10.7554/elife.21778), 2017-03-31
Supplement: supp [file elife-21778-supp-v2.zip › elife_poa_e21778_Figure_4_source_data_5.txt]

y	probability
0	1.33690405930416e-05
85	3.27975948159218e-07
111	1.43001760952313e-08
112	5.17215668673958e-08
113	3.60137653886309e-08
118	2.50003546600298e-07
119	7.58102047613622e-08
122	2.49426714745643e-07
123	6.31972005085489e-08
126	3.77543027654189e-08
130	3.27031482046633e-07
133	3.21504642519349e-07
134	6.53434481888435e-08
135	2.01301751058814e-07
136	1.70572897059325e-07
137	5.90337009395878e-08
138	4.50628379908531e-08
139	3.54552729427291e-08
140	3.27975948159218e-07
141	1.97968021181124e-07
143	2.42580143772246e-08
144	1.52546445724532e-07
145	6.0728769696932e-07
146	1.18621704294569e-07
147	3.93290773462981e-07
148	3.34941145370759e-07
149	1.67660624740385e-07
150	2.2018982669744e-07
151	3.46215663776997e-07
152	5.3147153930395e-07
153	5.16505542554408e-08
154	6.3992755561288e-07
155	1.37349539730105e-07
156	1.49925811243008e-07
157	3.03730425114808e-07
158	6.86097382764114e-08
159	1.82060623898324e-07
160	2.9925638823694e-07
161	8.93172591347349e-07
162	5.75242095451622e-07
163	2.92663467576345e-07
164	9.57051843496929e-07
165	9.12063162641505e-07
166	5.70661148779663e-07
167	1.06131651074551e-06
168	5.51655179359424e-07
169	2.65854000687151e-07
170	4.74753369324048e-07
171	9.58897416180692e-07
172	1.04713344403308e-06
173	1.1110860620713e-06
174	9.71730764905244e-07
175	6.65243725646445e-07
176	8.99647888361898e-07
177	1.23516323983212e-06
178	8.61264719538705e-07
179	1.20893980491366e-06
180	1.4253236125853e-06
181	1.08168192523426e-06
182	2.04875292714303e-06
183	1.33455393773366e-06
184	2.67300215288368e-06
185	1.60337884047024e-06
186	1.44446175787548e-06
187	2.14488459940615e-06
188	1.60859701443398e-06
189	3.13191117333133e-06
190	3.14962276485807e-06
191	3.1087958375474e-06
192	4.55878068647121e-06
193	2.88021268893802e-06
194	3.04347665017251e-06
195	5.1640489635956e-06
196	4.84293903041075e-06
197	4.38454213002671e-06
198	4.64304780706659e-06
199	5.69333473752181e-06
200	6.52325707176961e-06
201	5.11021226096644e-06
202	4.04492683274438e-06
203	2.71987868399628e-06
204	3.46403660738452e-06
205	2.36417760369413e-06
206	1.71618684363247e-06
207	2.33556554349614e-06
208	2.06546489380071e-06
209	1.29492117412747e-06
210	1.71209562474224e-06
211	8.47460548563465e-07
212	1.33512038630566e-06
213	8.8888170447151e-07
214	9.55559883759328e-07
215	1.08915952740833e-06
216	8.43571201565187e-07
217	1.25133692572078e-06
218	1.58773962235031e-06
219	1.12516117157138e-06
220	4.90663438379416e-07
221	8.36266599730685e-07
222	5.72733835875339e-07
223	1.46168817270544e-06
224	1.41649411333325e-06
225	9.13053786847863e-07
226	2.08980512018389e-07
227	4.93851770984583e-07
228	1.58383284665133e-07
229	3.90301688805845e-07
230	5.41316483285833e-07
231	4.82346886720974e-07
232	2.03872599139531e-06
233	1.44402790971635e-06
234	6.3678944785262e-07
235	2.47902959721809e-07
236	1.78522411092034e-07
237	1.44963727135706e-08
238	2.96666017887826e-07
239	5.28137343530402e-07
240	2.46165077622423e-07
241	4.36595558778903e-07
242	6.44962258460699e-07
243	3.09073995884892e-07
244	3.04636353875621e-07
245	3.32172919722282e-07
246	2.40742687925137e-07
247	6.93644020775e-07
248	1.17654879747569e-06
249	2.27706934158306e-06
250	4.27521510421009e-07
251	2.04860775749314e-07
252	2.75956287165394e-07
253	2.08637126720856e-08
254	2.87729500037325e-07
255	1.6667990166434e-07
256	4.55506530915666e-07
257	3.09683835229697e-07
258	1.05100952506488e-06
259	2.45452919125326e-07
260	1.74107686892138e-07
261	6.97329991766785e-08
262	6.75602022821338e-07
263	4.91266499334199e-08
264	4.1025757557567e-08
265	5.07869427154541e-08
266	4.94817234330468e-08
267	7.33370516104267e-08
268	5.02646894854841e-08
269	8.88707363601948e-08
270	7.28216141201388e-08
271	5.5834758877109e-08
272	7.57458256902684e-08
273	6.9233647777031e-08
274	1.09192238319421e-07
275	1.12865869210018e-07
276	1.08425515904041e-07
277	1.46415529728233e-07
278	1.13969080639794e-07
279	1.19883848066754e-07
280	1.83238197262597e-07
281	1.68259482053586e-07
282	1.68320067939995e-07
283	1.82421527862621e-07
284	2.18188539082641e-07
285	2.43531041626424e-07
286	1.99615283658406e-07
287	1.87147147351441e-07
288	1.34528057313323e-07
289	1.76348168253894e-07
290	1.60986408551919e-07
291	1.43123160421017e-07
292	1.7211802875549e-07
293	1.55060818923592e-07
294	1.78172779307282e-07
295	1.98339366827541e-07
296	1.65812087982148e-07
297	2.1680289804479e-07
298	1.85230389550422e-07
299	2.0918946465546e-07
300	2.2762464107385e-07
301	2.44919940638862e-07
302	2.90523198988179e-07
303	2.64189893544833e-07
304	2.85808537812814e-07
305	2.84489318299655e-07
306	3.48378335992406e-07
307	3.56797237227173e-07
308	3.95136118643372e-07
309	4.27949097411473e-07
310	4.40583161700131e-07
311	4.49271279651336e-07
312	5.38541157175671e-07
313	5.50645663971501e-07
314	5.9514411921548e-07
315	5.93129671489837e-07
316	5.94565492175503e-07
317	7.54530046506448e-07
318	7.78642336111033e-07
319	7.77632200477226e-07
320	7.40135166570208e-07
321	7.60536572529354e-07
322	8.96232969845878e-07
323	8.27114210296156e-07
324	8.77894985493674e-07
325	1.00863935403098e-06
326	9.88501298168872e-07
327	1.03569811511335e-06
328	1.10544367514221e-06
329	1.21403642170329e-06
330	1.23898937611004e-06
331	1.29487063656298e-06
332	1.3983738862782e-06
333	1.39124925860904e-06
334	1.56235193884227e-06
335	1.55942456495156e-06
336	1.67355805180101e-06
337	1.72660987604998e-06
338	1.72632998916255e-06
339	1.79844886491144e-06
340	1.95520376778656e-06
341	2.05388974791137e-06
342	2.01948571013309e-06
343	2.23913227921125e-06
344	2.37032862307132e-06
345	2.45454381648852e-06
346	2.56966162040469e-06
347	2.61924300396139e-06
348	2.66314415839101e-06
349	2.8178598446454e-06
350	2.83623560667567e-06
351	3.03094968382813e-06
352	3.09848888019809e-06
353	3.22165887317881e-06
354	3.37028487804307e-06
355	3.41421884722106e-06
356	3.70213513602295e-06
357	3.77748467083606e-06
358	3.80317126777252e-06
359	4.07020610189062e-06
360	4.28093747929486e-06
361	4.55710552917481e-06
362	4.83473890796046e-06
363	5.02400974233607e-06
364	5.23052707273373e-06
365	5.30912495208584e-06
366	5.62357187048709e-06
367	5.6619307345044e-06
368	5.90928843660066e-06
369	6.12159836090364e-06
370	6.05760913579472e-06
371	6.60429734726313e-06
372	6.87579266216338e-06
373	7.02240566757909e-06
374	7.3233320428514e-06
375	7.43172798900739e-06
376	7.78015452506285e-06
377	8.06143406706255e-06
378	8.3167783381249e-06
379	8.94334993805107e-06
380	9.10497209156354e-06
381	9.51448327948134e-06
382	9.89500723843177e-06
383	1.01358226638452e-05
384	1.0832774669332e-05
385	1.08598179399737e-05
386	1.11874495403752e-05
387	1.15912595974997e-05
388	1.19683043877035e-05
389	1.24007973513879e-05
390	1.275713442183e-05
391	1.32059776164257e-05
392	1.33414408184283e-05
393	1.32794567242422e-05
394	1.3655964070267e-05
395	1.36587886357018e-05
396	1.39116409749706e-05
397	1.36888895836343e-05
398	1.32345241652112e-05
399	1.33756156634323e-05
400	1.29536675591668e-05
401	1.22543146231665e-05
402	1.17065742376871e-05
403	1.12304769190963e-05
404	1.06360740439809e-05
405	1.01368398923255e-05
406	9.65015051508153e-06
407	9.30342304547306e-06
408	8.90332536437879e-06
409	8.55663374828923e-06
410	8.1964590947436e-06
411	7.75512234378779e-06
412	7.62385142621499e-06
413	7.53572833714034e-06
414	7.50498248658199e-06
415	7.16757491333784e-06
416	7.15600312629305e-06
417	6.78746520912445e-06
418	6.5727176866591e-06
419	6.60387562059856e-06
420	6.29715016402541e-06
421	6.19000548120291e-06
422	6.27800123495306e-06
423	6.17722916808795e-06
424	6.02176699136194e-06
425	5.74520100227402e-06
426	5.32004490794171e-06
427	5.24289021830918e-06
428	5.25483102175337e-06
429	5.16137950442104e-06
430	5.00195100577221e-06
431	5.28007636995749e-06
432	5.17323345586344e-06
433	5.12505588939858e-06
434	4.72480118651627e-06
435	4.27906178440646e-06
436	4.25175473762731e-06
437	4.14898517805132e-06
438	4.22531680108259e-06
439	4.27359865725574e-06
440	4.33100238590993e-06
441	4.30646716236261e-06
442	4.15803288390765e-06
443	3.98497540929018e-06
444	4.14101434814809e-06
445	3.96775642813585e-06
446	3.99475280650415e-06
447	4.09427914477091e-06
448	4.2018331613733e-06
449	4.175144228753e-06
450	3.85675782705427e-06
451	3.50928581057276e-06
452	3.1404827253433e-06
453	3.15346288104156e-06
454	2.99330090569107e-06
455	2.83980618886528e-06
456	2.95984073746099e-06
457	2.92056761915355e-06
458	2.61888390298207e-06
459	2.4025359060469e-06
460	2.12399673504033e-06
461	2.0388441749311e-06
462	2.05608703477183e-06
463	1.90223132016539e-06
464	1.9010789635088e-06
465	1.8562498496252e-06
466	1.88473704561034e-06
467	1.66603818045297e-06
468	1.50754420156267e-06
469	1.37560029779861e-06
470	1.44465741527219e-06
471	1.4664014360366e-06
472	1.61361055109435e-06
473	1.56302070991811e-06
474	1.51067991000027e-06
475	1.40678536600866e-06
476	1.42046077795054e-06
477	1.39606841603666e-06
478	1.38200219396404e-06
479	1.53824413169833e-06
480	1.64253205639445e-06
481	1.88282166295563e-06
482	1.70948348324091e-06
483	1.55655878956318e-06
484	1.45655357671846e-06
485	1.48100716505564e-06
486	1.50683044452524e-06
487	1.56834914341297e-06
488	1.6294467231574e-06
489	1.66997571076443e-06
490	1.80706485971293e-06
491	1.82437233900649e-06
492	1.77319593971078e-06
493	1.77718751524543e-06
494	1.89886169775682e-06
495	1.92957136424168e-06
496	2.05366189757161e-06
497	2.17588855460368e-06
498	2.26019337815943e-06
499	2.21111923026734e-06
500	2.27335470560437e-06
501	2.37935740849955e-06
502	2.4358305707432e-06
503	2.5721157792494e-06
504	2.69301986539948e-06
505	2.83668456510077e-06
506	2.97338798349708e-06
507	3.15712324585228e-06
508	3.16971264790292e-06
509	3.29805918865715e-06
510	3.43581101251578e-06
511	3.60569435560341e-06
512	3.69172312024813e-06
513	3.83431608935221e-06
514	4.02191470976337e-06
515	4.14125281342072e-06
516	4.35760424677088e-06
517	4.51003673400425e-06
518	4.69649237135627e-06
519	4.848207154393e-06
520	5.05646492920933e-06
521	5.21938325445905e-06
522	5.40909206654935e-06
523	5.61987909017504e-06
524	5.86455999874403e-06
525	6.08140688555876e-06
526	6.3236642471592e-06
527	6.56674252661524e-06
528	6.81205181357839e-06
529	7.08818474455065e-06
530	7.34455450359623e-06
531	7.61352707016076e-06
532	7.90159570123454e-06
533	8.20268937441592e-06
534	8.48352663860244e-06
535	8.79681307472685e-06
536	9.12027697758531e-06
537	9.39971280756547e-06
538	9.73493147004862e-06
539	1.00638092725556e-05
540	1.04127462698431e-05
541	1.07770032227661e-05
542	1.11205556037398e-05
543	1.15059614928715e-05
544	1.18912353027001e-05
545	1.2276424855809e-05
546	1.26752133762318e-05
547	1.30476467428362e-05
548	1.34691670456926e-05
549	1.38788073565914e-05
550	1.43064278152338e-05
551	1.47754670915607e-05
552	1.5213597126018e-05
553	1.56926490447773e-05
554	1.61565463623535e-05
555	1.66695871588294e-05
556	1.71833884198968e-05
557	1.76880549897067e-05
558	1.82350862024632e-05
559	1.87562303495952e-05
560	1.93154503291846e-05
561	1.99261876434479e-05
562	2.04556002890251e-05
563	2.10599218705176e-05
564	2.16339713763406e-05
565	2.21479055606483e-05
566	2.27587301250461e-05
567	2.33182452644316e-05
568	2.39176090902898e-05
569	2.44771518089088e-05
570	2.50595702439306e-05
571	2.56886846555611e-05
572	2.62722093147813e-05
573	2.6907699377917e-05
574	2.75162842006328e-05
575	2.81132267382009e-05
576	2.87607973837798e-05
577	2.93357618987714e-05
578	2.99697490362764e-05
579	3.06018053548414e-05
580	3.11831542877133e-05
581	3.17593003036176e-05
582	3.22534764270511e-05
583	3.28176803724924e-05
584	3.33006178619826e-05
585	3.37250839841377e-05
586	3.41666193173536e-05
587	3.45031887425156e-05
588	3.48211032677475e-05
589	3.50979561689245e-05
590	3.52698546283496e-05
591	3.54213035786087e-05
592	3.54803808753773e-05
593	3.54248218678724e-05
594	3.53602360963968e-05
595	3.52151792863532e-05
596	3.49847448592534e-05
597	3.46237451780997e-05
598	3.42609226058354e-05
599	3.38041140121936e-05
600	3.32949976395277e-05
601	3.2760375712889e-05
602	3.21750403590786e-05
603	3.16326150071875e-05
604	3.10703840457898e-05
605	3.05003986621445e-05
606	2.99350684093295e-05
607	2.93761088114984e-05
608	2.8862917002468e-05
609	2.83649718196355e-05
610	2.78669802571267e-05
611	2.7452157490459e-05
612	2.70153047978232e-05
613	2.66223837992927e-05
614	2.62390939029507e-05
615	2.58309676375755e-05
616	2.54077703992119e-05
617	2.50080156460537e-05
618	2.4623460426848e-05
619	2.4222214851323e-05
620	2.39052868740238e-05
621	2.35508927923512e-05
622	2.31899986779655e-05
623	2.28750928130733e-05
624	2.24891386906544e-05
625	2.20672786869955e-05
626	2.17203191668062e-05
627	2.13645687178774e-05
628	2.10804669555063e-05
629	2.07642859107908e-05
630	2.04418631786293e-05
631	2.01645754886175e-05
632	1.98520416895667e-05
633	1.95408644962119e-05
634	1.91496988739074e-05
635	1.88207342655246e-05
636	1.85294132529548e-05
637	1.8272722837861e-05
638	1.80337856090413e-05
639	1.77922820348634e-05
640	1.75450637998386e-05
641	1.72641188329731e-05
642	1.69480693772445e-05
643	1.66633231026644e-05
644	1.63689425753317e-05
645	1.61009736779109e-05
646	1.58321599679431e-05
647	1.54873979744322e-05
648	1.52036032260982e-05
649	1.48193351522e-05
650	1.43842649935038e-05
651	1.39865842151154e-05
652	1.36057903416479e-05
653	1.32197023819091e-05
654	1.28851380183226e-05
655	1.2542704453624e-05
656	1.22155482753537e-05
657	1.1877605669614e-05
658	1.15090892484306e-05
659	1.11259447071701e-05
660	1.07994306911289e-05
661	1.05687645002851e-05
662	1.03227837395784e-05
663	1.01218245112598e-05
664	9.9028473513514e-06
665	9.70919731825288e-06
666	9.48744864168125e-06
667	9.26950418372062e-06
668	9.09862191543532e-06
669	8.94695910305084e-06
670	8.86610147866541e-06
671	8.82452017357027e-06
672	8.77496760743178e-06
673	8.69321581764035e-06
674	8.61182237661462e-06
675	8.51529551631003e-06
676	8.48658232935328e-06
677	8.47013153750743e-06
678	8.47781391323758e-06
679	8.50975622860787e-06
680	8.59471762257301e-06
681	8.63587340386832e-06
682	8.62991340004654e-06
683	8.60673616050516e-06
684	8.5912335327593e-06
685	8.66012682054421e-06
686	8.754896364876e-06
687	8.87193987104802e-06
688	9.00961769304103e-06
689	9.17822273121985e-06
690	9.30992130973415e-06
691	9.4355317383012e-06
692	9.55435107301101e-06
693	9.72847904242536e-06
694	9.92117431432715e-06
695	1.01528370072512e-05
696	1.04022288545058e-05
697	1.06501020572128e-05
698	1.09067846176813e-05
699	1.1129395329971e-05
700	1.13655690639516e-05
701	1.16215230275653e-05
702	1.19370386389868e-05
703	1.22625452404601e-05
704	1.26194551805105e-05
705	1.2992175556957e-05
706	1.33560738912008e-05
707	1.36945673659857e-05
708	1.40573607850039e-05
709	1.44377752612377e-05
710	1.48470537523838e-05
711	1.52980478523004e-05
712	1.57487672226097e-05
713	1.62308585024221e-05
714	1.67127231067252e-05
715	1.72025988103111e-05
716	1.76792464670488e-05
717	1.81862584193992e-05
718	1.87296409448019e-05
719	1.93052986669257e-05
720	1.9900299003011e-05
721	2.05092144830072e-05
722	2.11265682688814e-05
723	2.17568161810055e-05
724	2.24048317247047e-05
725	2.30648777197646e-05
726	2.37496753755784e-05
727	2.44567709320555e-05
728	2.52073499930516e-05
729	2.59557423468848e-05
730	2.67255731758226e-05
731	2.74754248942405e-05
732	2.824651795457e-05
733	2.90415567949702e-05
734	2.98616927628698e-05
735	3.0703937477451e-05
736	3.1559271136017e-05
737	3.24353522271916e-05
738	3.33241459220287e-05
739	3.42330351172767e-05
740	3.51396597093147e-05
741	3.60577985306857e-05
742	3.69961406250124e-05
743	3.79663860755364e-05
744	3.89349617568363e-05
745	3.99293256241297e-05
746	4.09332402821284e-05
747	4.1946888864207e-05
748	4.29770419368271e-05
749	4.40140849009048e-05
750	4.50758044134115e-05
751	4.61415774356176e-05
752	4.72292021322043e-05
753	4.832662257639e-05
754	4.94249360224868e-05
755	5.05413173269171e-05
756	5.16655337659464e-05
757	5.27807273541064e-05
758	5.39140640739576e-05
759	5.50478324209813e-05
760	5.61826437522239e-05
761	5.73124838515313e-05
762	5.84441395691988e-05
763	5.9578515176115e-05
764	6.06909018444006e-05
765	6.18109670796428e-05
766	6.29097559663935e-05
767	6.40030081883508e-05
768	6.50907271914405e-05
769	6.61543159667614e-05
770	6.72049421808598e-05
771	6.82416854966984e-05
772	6.92580007231138e-05
773	7.02567305413308e-05
774	7.12252138406303e-05
775	7.21702980769068e-05
776	7.30817459361228e-05
777	7.3947698407642e-05
778	7.47888662825448e-05
779	7.55744784631262e-05
780	7.63157853617615e-05
781	7.70029478338919e-05
782	7.76324316585422e-05
783	7.8206175951356e-05
784	7.8716262443566e-05
785	7.91617454784305e-05
786	7.95328351755493e-05
787	7.98380107155497e-05
788	8.00674445985196e-05
789	8.02166336277674e-05
790	8.02990822219602e-05
791	8.03038172468707e-05
792	8.02296340209616e-05
793	8.009140390256e-05
794	7.9876778029541e-05
795	7.9597347633404e-05
796	7.92515626799337e-05
797	7.88419048314371e-05
798	7.83829268017378e-05
799	7.78752024171035e-05
800	7.73306023921294e-05
801	7.67468074578063e-05
802	7.61408951701787e-05
803	7.55155602710518e-05
804	7.48710166044471e-05
805	7.42122741735877e-05
806	7.35419475386605e-05
807	7.28651893470711e-05
808	7.21859785938012e-05
809	7.15046025910852e-05
810	7.08285330625476e-05
811	7.01449677179298e-05
812	6.9465761671806e-05
813	6.87838439070474e-05
814	6.80840568135832e-05
815	6.73945344045002e-05
816	6.66929331193772e-05
817	6.59888563722231e-05
818	6.52877183217043e-05
819	6.45844208107798e-05
820	6.38793637172918e-05
821	6.32907620752635e-05
822	6.24618198364338e-05
823	6.17473822186862e-05
824	6.10272703462589e-05
825	6.03072475563913e-05
826	5.95848626691509e-05
827	5.88730039336028e-05
828	5.81672295299077e-05
829	5.74492104242227e-05
830	5.67359362633502e-05
831	5.60154530042281e-05
832	5.52990465128953e-05
833	5.4578039235461e-05
834	5.38518386292699e-05
835	5.31358357918557e-05
836	5.24198866259992e-05
837	5.17060861415618e-05
838	5.09919319633789e-05
839	5.0265418953175e-05
840	4.95380614133829e-05
841	4.88046075528024e-05
842	4.80577887674296e-05
843	4.73168771059598e-05
844	4.6571419250459e-05
845	4.5823525476724e-05
846	4.50671829079475e-05
847	4.43090724144682e-05
848	4.35407726720556e-05
849	4.27691620690295e-05
850	4.20058792197844e-05
851	4.12473688312228e-05
852	4.05114291105062e-05
853	3.97915673615336e-05
854	3.90822784360909e-05
855	3.83915779898181e-05
856	3.7721638273703e-05
857	3.7064502777614e-05
858	3.64320186057596e-05
859	3.58249652793187e-05
860	3.52588246227176e-05
861	3.47255051541014e-05
862	3.42241229074813e-05
863	3.37507756390417e-05
864	3.32998580178421e-05
865	3.28765041854241e-05
866	3.24781721848089e-05
867	3.21122066977768e-05
868	3.17808103861393e-05
869	3.14926977851457e-05
870	3.1236910953885e-05
871	3.1011597836031e-05
872	3.08129260795715e-05
873	3.06320712626196e-05
874	3.04702682462359e-05
875	3.03460169118717e-05
876	3.02522813855046e-05
877	3.01930213428714e-05
878	3.01670216424593e-05
879	3.0166603975397e-05
880	3.01968343120523e-05
881	3.02451011280053e-05
882	3.03116187946702e-05
883	3.03989775767282e-05
884	3.05271482220109e-05
885	3.06936308755188e-05
886	3.08970289036102e-05
887	3.11328591060065e-05
888	3.13988863450474e-05
889	3.1690795110723e-05
890	3.20057992153168e-05
891	3.23426078311174e-05
892	3.27108927367447e-05
893	3.31205247715429e-05
894	3.35654473217183e-05
895	3.40450906542566e-05
896	3.45474022766586e-05
897	3.50799063185681e-05
898	3.56318246722556e-05
899	3.62082469973036e-05
900	3.68176652938443e-05
901	3.74616968725124e-05
902	3.81424437225403e-05
903	3.88618391929814e-05
904	3.96117058298004e-05
905	4.03867067261228e-05
906	4.11895333462992e-05
907	4.2009960499475e-05
908	4.28653247313038e-05
909	4.37588254018296e-05
910	4.46950749393097e-05
911	4.5662142957494e-05
912	4.66665980538986e-05
913	4.76996575971911e-05
914	4.87592881022765e-05
915	4.98441487456278e-05
916	5.09587552624815e-05
917	5.21109342977111e-05
918	5.33025148786883e-05
919	5.45349392391801e-05
920	5.57996436598076e-05
921	5.70932280142104e-05
922	5.84118560643648e-05
923	5.97581395946246e-05
924	6.11298440257492e-05
925	6.25355447430923e-05
926	6.3972625934178e-05
927	6.54435432455397e-05
928	6.6945101339454e-05
929	6.84732713775522e-05
930	7.00213995519953e-05
931	7.15858004905736e-05
932	7.3174226218857e-05
933	7.47869215829945e-05
934	7.64306351537208e-05
935	7.80999098291544e-05
936	7.97933115348902e-05
937	8.15085960787894e-05
938	8.32432931393426e-05
939	8.49918198035735e-05
940	8.67516233711488e-05
941	8.85281267641014e-05
942	9.03264816924686e-05
943	9.21455362205746e-05
944	9.39760673721055e-05
945	9.5821298927534e-05
946	9.76751146168865e-05
947	9.95392474205726e-05
948	0.000101405156733324
949	0.00010327758204077
950	0.000105157246826022
951	0.000107047414330803
952	0.000108934833103577
953	0.000110824445784895
954	0.000112712010016144
955	0.000114587474506738
956	0.000116455570455656
957	0.000118313126150741
958	0.000120158382066483
959	0.000121990586534967
960	0.000123809887112611
961	0.000125609245745062
962	0.000127383932075446
963	0.000129130503375887
964	0.00013084902871033
965	0.000132536573766819
966	0.00013419527059583
967	0.000135813048389297
968	0.000137399053341126
969	0.00013894100945541
970	0.000140437467830063
971	0.000141887576440059
972	0.0001432869603531
973	0.000144633292533503
974	0.000145916560435698
975	0.000147151344567832
976	0.00014831419691347
977	0.000149417221338729
978	0.000150450831053474
979	0.000151409308459408
980	0.000152295777703959
981	0.000153105064745271
982	0.000153841956214442
983	0.000154491559054585
984	0.000155060624211062
985	0.000155555984052957
986	0.00015596286450446
987	0.000156283640664542
988	0.000156528949015045
989	0.000156682143502191
990	0.000156757461724382
991	0.000156758335489332
992	0.000156685707903095
993	0.000156534101271109
994	0.000156311209302204
995	0.000156018071001212
996	0.000155656648770927
997	0.000155239047165682
998	0.000154763036821299
999	0.000154227334132043
1000	0.000153647292359567
1001	0.000153019339691596
1002	0.000152343210754407
1003	0.000151637138339472
1004	0.000150879649836355
1005	0.000150104738649063
1006	0.000149275600873488
1007	0.000148424858694888
1008	0.000147552683152072
1009	0.000146642131763712
1010	0.000145723787776518
1011	0.00014476814283455
1012	0.000143787431546337
1013	0.00014279546837418
1014	0.000141755500219379
1015	0.000140709007037497
1016	0.000139658417114667
1017	0.000138569643059239
1018	0.000137459380763435
1019	0.000136337936759654
1020	0.000135206841059172
1021	0.000134056433388758
1022	0.000132872467435719
1023	0.000131677076300036
1024	0.000130465440040174
1025	0.000129259158116926
1026	0.000128024624410109
1027	0.000126784653236086
1028	0.000125543924766165
1029	0.000124284942439077
1030	0.000123012354181598
1031	0.000121740186825542
1032	0.000120450412052616
1033	0.000119164207813982
1034	0.000117863918310133
1035	0.00011656235070762
1036	0.000115256831246797
1037	0.000113943206903303
1038	0.000112630358700724
1039	0.000111313954800766
1040	0.000109989492207584
1041	0.000108662246629566
1042	0.000107345880964054
1043	0.000106026591584519
1044	0.000104721533723747
1045	0.000103415636610873
1046	0.000102112482758378
1047	0.000100818781796835
1048	9.95462998907905e-05
1049	9.82845143238459e-05
1050	9.70466893811182e-05
1051	9.58312118052644e-05
1052	9.46391088130979e-05
1053	9.34875879999021e-05
1054	9.23463464246778e-05
1055	9.12346276366505e-05
1056	9.01595163769403e-05
1057	8.91231879588504e-05
1058	8.81236817033907e-05
1059	8.71684541736177e-05
1060	8.62550722248036e-05
1061	8.53796243819152e-05
1062	8.45513157518385e-05
1063	8.37653608778472e-05
1064	8.30199429481167e-05
1065	8.23218807386494e-05
1066	8.1669960275091e-05
1067	8.10650185451826e-05
1068	8.05128926741689e-05
1069	8.00091184161527e-05
1070	7.95593824332727e-05
1071	7.91314519828528e-05
1072	7.87647410283602e-05
1073	7.8448290338782e-05
1074	7.81772914751168e-05
1075	7.79605450693427e-05
1076	7.77913632927018e-05
1077	7.76765948603257e-05
1078	7.76070385124791e-05
1079	7.75955253778206e-05
1080	7.76201747820155e-05
1081	7.7700673987551e-05
1082	7.78312124107109e-05
1083	7.80190689612908e-05
1084	7.82501279495584e-05
1085	7.85400784723735e-05
1086	7.88828840429036e-05
1087	7.92774757084963e-05
1088	7.9723778080499e-05
1089	8.0221120403482e-05
1090	8.07704739265589e-05
1091	8.13707914318576e-05
1092	8.20250826187568e-05
1093	8.27333251399989e-05
1094	8.34948487697343e-05
1095	8.43087597700649e-05
1096	8.5173593384635e-05
1097	8.60890836245297e-05
1098	8.70560946088254e-05
1099	8.80751216668879e-05
1100	8.914724704445e-05
1101	9.02742308983253e-05
1102	9.1454430685493e-05
1103	9.26874688136515e-05
1104	9.39726071189846e-05
1105	9.53093246891937e-05
1106	9.66961234503353e-05
1107	9.813448846324e-05
1108	9.96259594639149e-05
1109	0.000101170822977661
1110	0.000102769558891818
1111	0.000104419702466497
1112	0.000106120471149256
1113	0.000107870618604634
1114	0.000109669190063569
1115	0.000111515851314916
1116	0.000113411555602037
1117	0.000115356255529249
1118	0.00011735078122398
1119	0.000119391649231952
1120	0.000121478071967197
1121	0.00012360733701282
1122	0.000125777917864463
1123	0.000127989107002548
1124	0.000130240377241694
1125	0.000132531997007325
1126	0.000134862499050046
1127	0.00013723135361338
1128	0.000139634442717214
1129	0.000142070728445974
1130	0.000144537077928571
1131	0.000147032176345459
1132	0.000149555536929025
1133	0.000152108014438284
1134	0.000154686798547924
1135	0.000157290749948857
1136	0.000159916748490035
1137	0.000162562530686475
1138	0.000165226519346512
1139	0.000167904121865627
1140	0.00017059472834604
1141	0.000173297410540187
1142	0.000176012287746922
1143	0.000178736492206961
1144	0.000181464944610243
1145	0.000184196567927999
1146	0.000186928623495862
1147	0.000189656206441233
1148	0.000192378741780133
1149	0.000195094319204167
1150	0.000197801040868989
1151	0.000200495632359685
1152	0.00020317563936165
1153	0.000205837141228009
1154	0.000208475230650898
1155	0.000211089481170587
1156	0.000213673916137235
1157	0.000216229069842889
1158	0.000218750953346292
1159	0.00022123702632161
1160	0.00022368448203046
1161	0.000226090262598951
1162	0.000228449375275934
1163	0.000230757532003204
1164	0.000233015280481828
1165	0.000235217518275805
1166	0.000237362453176153
1167	0.000239448137425443
1168	0.000241470660521085
1169	0.00024342686959149
1170	0.000245314710278462
1171	0.00024712897852169
1172	0.000248869809543955
1173	0.000250532236935361
1174	0.000252116398572003
1175	0.000253619984286423
1176	0.000255039708761017
1177	0.000256376242634686
1178	0.000257623538122409
1179	0.000258781172357867
1180	0.000259849985008907
1181	0.000260827276334925
1182	0.000261713461153118
1183	0.000262507997122985
1184	0.000263209764590565
1185	0.000263819349094577
1186	0.000264335575052626
1187	0.000264761709761855
1188	0.000265094065937296
1189	0.000265337986186428
1190	0.00026549321065262
1191	0.000265559561533652
1192	0.000265545990122132
1193	0.000265446817911747
1194	0.000265265262657659
1195	0.000265005351619615
1196	0.000264666534629944
1197	0.000264254491175531
1198	0.000263769394584986
1199	0.000263214243825591
1200	0.00026259458282991
1201	0.000261905770454994
1202	0.000261155459984658
1203	0.000260343482041291
1204	0.000259470986076704
1205	0.000258544733516449
1206	0.000257557885946328
1207	0.000256520078501246
1208	0.00025543113820707
1209	0.000254292426270046
1210	0.00025310541757413
1211	0.000251870867856433
1212	0.000250591657365358
1213	0.000249265846549809
1214	0.000247896301972881
1215	0.000246489747992424
1216	0.000245041201448658
1217	0.000243557209345088
1218	0.000242033359602438
1219	0.000240473122215554
1220	0.000238884485068722
1221	0.000237259844172128
1222	0.000235603174130498
1223	0.000233919434050615
1224	0.000232209977052657
1225	0.000230474485866005
1226	0.000228716351940233
1227	0.000226936583474531
1228	0.00022513750217355
1229	0.000223319564983009
1230	0.000221485020798775
1231	0.00021963545367468
1232	0.000217772246052831
1233	0.000215899989958134
1234	0.000214018803311917
1235	0.000212130576844864
1236	0.000210234275879495
1237	0.000208337233571343
1238	0.000206435897838905
1239	0.000204536920186239
1240	0.000202643532868856
1241	0.000200753377807594
1242	0.000198873342627337
1243	0.000197005890240029
1244	0.000195150673184603
1245	0.000193311242563631
1246	0.000191490027615618
1247	0.000189689593455036
1248	0.000187916687960448
1249	0.000186172351130543
1250	0.000184457572559653
1251	0.000182775378953031
1252	0.000181132550861265
1253	0.000179524740393287
1254	0.000177958029563133
1255	0.000176431490925673
1256	0.000174949894183854
1257	0.000173519181828147
1258	0.000172137178066343
1259	0.000170808190503848
1260	0.0001695320325057
1261	0.000168310379552631
1262	0.000167144141477234
1263	0.000166034280810814
1264	0.000164983095772686
1265	0.000163994716969136
1266	0.000163065092289165
1267	0.000162199405512189
1268	0.000161397792783871
1269	0.000160660656797073
1270	0.00015998738874988
1271	0.000159377720640995
1272	0.000158834607542467
1273	0.000158358772063964
1274	0.000157954410863398
1275	0.000157617731434285
1276	0.000157350913018212
1277	0.000157156516562068
1278	0.000157031377595936
1279	0.000156975335081874
1280	0.000156991628138085
1281	0.000157079675655412
1282	0.000157241907198537
1283	0.000157478115934394
1284	0.000157786544095063
1285	0.000158169997879153
1286	0.000158626855843162
1287	0.000159158136007023
1288	0.000159761441720486
1289	0.000160439475951552
1290	0.000161191991417544
1291	0.000162020664140933
1292	0.000162923487070317
1293	0.000163901775617764
1294	0.00016495290287412
1295	0.000166077934455932
1296	0.000167276499876148
1297	0.000168549769479376
1298	0.000169896412451883
1299	0.000171316782381725
1300	0.000172812036402417
1301	0.000174380009353688
1302	0.00017602179070068
1303	0.000177732288771821
1304	0.000179514469821992
1305	0.000181368012603358
1306	0.000183292994614277
1307	0.000185287874441961
1308	0.000187352344459972
1309	0.000189485397550847
1310	0.000191685649546585
1311	0.000193953014779187
1312	0.000196284419394772
1313	0.000198679153453991
1314	0.000201136942742424
1315	0.000203657108973326
1316	0.000206236774608613
1317	0.000208876043909377
1318	0.000211572478837059
1319	0.000214324004591701
1320	0.000217127806532072
1321	0.000219984040683667
1322	0.000222890306961699
1323	0.000225843963726447
1324	0.00022884431769354
1325	0.000231888607932724
1326	0.00023497507546342
1327	0.00023810101623484
1328	0.000241264582684581
1329	0.000244461489546436
1330	0.000247691704018697
1331	0.000250952117863888
1332	0.000254240633744668
1333	0.000257553993707426
1334	0.000260890819391684
1335	0.000264248226028802
1336	0.000267622437010744
1337	0.00027101192631878
1338	0.000274412512175635
1339	0.00027782225210006
1340	0.000281237831985533
1341	0.000284657342327153
1342	0.000288077037199554
1343	0.00029149438701113
1344	0.000294906069944511
1345	0.000298308906132622
1346	0.000301699251727861
1347	0.000305074403237514
1348	0.000308431129103581
1349	0.000311766409485815
1350	0.00031507740473437
1351	0.000318360438861083
1352	0.000321612346660724
1353	0.000324829716510003
1354	0.000328009199218182
1355	0.000331147258571068
1356	0.000334241301526275
1357	0.000337288149347422
1358	0.00034028432146564
1359	0.000343227485910734
1360	0.000346113924184478
1361	0.000348940649321857
1362	0.000351704494787163
1363	0.000354402244315092
1364	0.000357031590604481
1365	0.000359589677212
1366	0.000362073946136958
1367	0.000364481918301985
1368	0.00036681062047821
1369	0.000369058085868097
1370	0.000371221401569742
1371	0.000373298553705852
1372	0.000375287723923141
1373	0.00037718658811312
1374	0.000378994099077805
1375	0.000380708240976408
1376	0.000382328015372326
1377	0.000383851581297945
1378	0.000385277636382876
1379	0.000386605568349173
1380	0.000387834121598869
1381	0.000388963333057662
1382	0.000389993077445556
1383	0.000390922167278527
1384	0.000391751719342339
1385	0.000392480968558204
1386	0.000393109863109924
1387	0.00039363998619915
1388	0.000394070840641466
1389	0.00039440400214391
1390	0.000394639892703205
1391	0.00039478013111967
1392	0.000394825974488978
1393	0.000394777925559448
1394	0.000394637949673615
1395	0.000394406814510537
1396	0.000394086131934235
1397	0.000393677960678271
1398	0.000393183101458542
1399	0.000392604288952172
1400	0.000391942732017331
1401	0.000391199724232204
1402	0.000390377206749481
1403	0.000389476281741919
1404	0.000388499908379864
1405	0.000387448713050131
1406	0.000386324786007939
1407	0.000385130563381743
1408	0.000383866966000694
1409	0.000382536464271878
1410	0.000381140672435643
1411	0.000379680960596472
1412	0.000378159809909747
1413	0.00037657872360809
1414	0.000374939563827203
1415	0.00037324515855235
1416	0.000371497105172309
1417	0.000369697340605327
1418	0.000367847572730848
1419	0.000365950912212444
1420	0.000364008736342364
1421	0.000362023635262445
1422	0.000359998059215336
1423	0.000357934172722326
1424	0.000355835058304015
1425	0.000353702499498046
1426	0.000351538987460657
1427	0.000349346988260998
1428	0.00034712893663333
1429	0.000344887685545938
1430	0.000342625575587222
1431	0.000340345157530213
1432	0.000338049722342016
1433	0.000335741157968326
1434	0.000333422668427683
1435	0.000331096724191729
1436	0.000328765922109791
1437	0.000326433145401421
1438	0.000324101622593579
1439	0.000321774304488734
1440	0.000319453874138878
1441	0.000317144146657151
1442	0.000314847140385054
1443	0.000312566050163219
1444	0.000310304320362766
1445	0.00030806400639119
1446	0.000305848412554295
1447	0.000303661363489236
1448	0.00030150516890654
1449	0.000299383335528635
1450	0.000297297859523581
1451	0.000295251698249944
1452	0.00029324791022121
1453	0.000291288507192092
1454	0.000289376340130588
1455	0.000287513271277712
1456	0.000285702796653521
1457	0.000283947007514227
1458	0.000282248096833408
1459	0.000280608044550607
1460	0.000279028690182762
1461	0.000277511977824399
1462	0.000276059514606243
1463	0.000274673130526936
1464	0.000273355080085385
1465	0.000272106644304505
1466	0.00027092967148357
1467	0.000269825416224565
1468	0.000268794696229039
1469	0.000267839885741032
1470	0.000266961017466149
1471	0.000266159704045904
1472	0.000265437778382021
1473	0.000264796188467937
1474	0.000264235761338404
1475	0.000263757878671996
1476	0.000263362996610835
1477	0.0002630520629655
1478	0.000262825659474555
1479	0.000262684346509473
1480	0.00026262891505785
1481	0.000262660526449695
1482	0.000262779959894534
1483	0.00026298686186336
1484	0.000263282069921393
1485	0.000263665401723768
1486	0.000264137463191368
1487	0.000264698034878654
1488	0.000265347537452543
1489	0.000266086428664509
1490	0.00026691449815096
1491	0.000267832129873359
1492	0.000268838972524626
1493	0.000269934492922741
1494	0.000271118271988147
1495	0.000272390260555541
1496	0.000273750015024976
1497	0.000275197757897966
1498	0.000276732620536648
1499	0.000278354116381032
1500	0.000280061616946922
1501	0.000281854642553359
1502	0.000283731618511832
1503	0.000285691661039017
1504	0.000287734063427604
1505	0.000289857983802724
1506	0.000292062929688019
1507	0.000294347256521994
1508	0.000296709678189867
1509	0.000299148783878813
1510	0.00030166315141954
1511	0.000304250721145692
1512	0.000306910086918735
1513	0.000309639556652682
1514	0.000312437818997214
1515	0.000315302722571919
1516	0.000318232472456367
1517	0.000321224877977471
1518	0.000324277654529462
1519	0.000327388648713248
1520	0.000330555267396727
1521	0.000333775560269527
1522	0.000337047176810192
1523	0.000340367992836212
1524	0.000343735113800792
1525	0.000347146113894912
1526	0.000350598223229549
1527	0.000354088513068887
1528	0.000357614095260238
1529	0.000361172545189182
1530	0.000364760970234649
1531	0.000368376574454678
1532	0.000372016526718091
1533	0.000375677524589278
1534	0.000379356765374532
1535	0.000383050892119862
1536	0.000386756835295467
1537	0.000390471279283623
1538	0.000394191400444116
1539	0.000397914048686143
1540	0.000401635987909182
1541	0.000405353886415089
1542	0.000409064422714882
1543	0.000412764254451127
1544	0.000416450079144613
1545	0.000420118622414038
1546	0.000423766546859782
1547	0.000427390668008961
1548	0.000430987693496363
1549	0.000434554530174684
1550	0.000438087558882811
1551	0.000441583696503986
1552	0.000445039366811381
1553	0.000448451675759523
1554	0.000451817485670459
1555	0.000455133698908084
1556	0.000458397248562983
1557	0.000461605067019051
1558	0.000464754254976993
1559	0.000467841815571598
1560	0.00047086494177513
1561	0.000473820654823682
1562	0.000476706356267022
1563	0.000479519498231102
1564	0.000482257659864126
1565	0.000484918166020173
1566	0.000487498892011737
1567	0.00048999744992961
1568	0.000492411659535437
1569	0.000494739502231948
1570	0.000496978964185112
1571	0.000499128366633292
1572	0.000501185879546852
1573	0.000503150102226187
1574	0.000505019515118773
1575	0.000506792746445987
1576	0.000508468709238839
1577	0.000510046262687354
1578	0.00051152434321373
1579	0.000512902378695288
1580	0.000514179612492632
1581	0.000515355564073258
1582	0.000516429831930401
1583	0.000517402228553801
1584	0.000518272623023013
1585	0.000519040811252435
1586	0.000519707124626783
1587	0.000520271582222432
1588	0.000520734684063865
1589	0.000521096919357288
1590	0.000521358760479206
1591	0.000521520969294892
1592	0.000521584302496926
1593	0.000521549558785241
1594	0.000521417686486503
1595	0.000521189624467513
1596	0.00052086654683957
1597	0.000520449589793679
1598	0.000519939956456562
1599	0.000519339138487381
1600	0.000518648306831087
1601	0.000517868985080565
1602	0.000517002596862156
1603	0.000516050698824623
1604	0.000515014939609643
1605	0.00051389698517284
1606	0.000512698606494767
1607	0.000511421547069496
1608	0.00051006774364355
1609	0.000508639023576898
1610	0.000507137306594776
1611	0.00050556471128716
1612	0.000503923231026488
1613	0.00050221501040287
1614	0.000500442359054255
1615	0.000498607436886582
1616	0.000496712618710952
1617	0.000494760209691164
1618	0.000492752603743972
1619	0.00049069232268921
1620	0.000488581848850417
1621	0.000486423806852596
1622	0.000484220762848612
1623	0.00048197547977006
1624	0.000479690635599616
1625	0.00047736892823847
1626	0.000475013126396273
1627	0.000472626012858654
1628	0.000470210453043686
1629	0.000467769331186326
1630	0.000465305554416401
1631	0.000462822123962826
1632	0.000460321895340674
1633	0.000457807935398213
1634	0.000455283185155029
1635	0.000452750545996938
1636	0.000450213264388276
1637	0.000447674235104302
1638	0.000445136602466512
1639	0.000442603483896221
1640	0.000440077915702095
1641	0.000437562960327071
1642	0.000435062055940301
1643	0.000432577016826075
1644	0.000430112049755281
1645	0.000427669732239381
1646	0.000425253072701555
1647	0.000422864978521112
1648	0.000420508437051295
1649	0.000418186242810655
1650	0.000415901042304656
1651	0.000413655683105027
1652	0.000411452743829666
1653	0.000409294927960447
1654	0.000407184729741194
1655	0.000405124642867051
1656	0.000403117209332475
1657	0.000401164704486988
1658	0.000399269427088392
1659	0.00039743356774927
1660	0.000395659179147332
1661	0.00039394841550056
1662	0.000392303246787968
1663	0.000390725562603804
1664	0.000389217360823577
1665	0.000387780361313229
1666	0.000386416284618277
1667	0.000385126724612903
1668	0.000383913304572845
1669	0.000382777454625389
1670	0.000381720657191839
1671	0.000380744361899017
1672	0.000379849829533198
1673	0.000379038406059229
1674	0.000378311175427481
1675	0.000377669161043609
1676	0.000377113411760155
1677	0.000376644855315737
1678	0.000376264289115304
1679	0.000375972572400218
1680	0.000375770417306668
1681	0.000375658561971582
1682	0.000375637493213568
1683	0.000375707677838756
1684	0.00037586948108554
1685	0.000376123188244301
1686	0.000376469082410065
1687	0.000376907322126701
1688	0.000377438067140011
1689	0.000378061350924436
1690	0.000378777181703504
1691	0.000379585342045297
1692	0.000380485596825026
1693	0.000381477630921616
1694	0.000382561001852562
1695	0.000383735272058348
1696	0.000385000048897694
1697	0.000386354667431484
1698	0.000387798461795091
1699	0.000389330637249795
1700	0.000390950271131628
1701	0.000392656447872915
1702	0.000394448042092675
1703	0.000396323941572003
1704	0.000398282966220687
1705	0.000400323977393886
1706	0.000402445586445684
1707	0.000404646326308536
1708	0.000406924627343526
1709	0.000409278845413428
1710	0.00041170724692422
1711	0.000414208029489058
1712	0.000416779329295653
1713	0.000419419287681109
1714	0.000422125961039263
1715	0.000424897222628495
1716	0.000427730909926452
1717	0.000430624705950313
1718	0.00043357637097544
1719	0.000436583466753406
1720	0.000439643612165833
1721	0.000442754394719428
1722	0.000445913289206794
1723	0.000449117716819408
1724	0.000452365043186083
1725	0.000455652511050465
1726	0.000458977331642316
1727	0.000462336720861153
1728	0.000465727806787797
1729	0.000469147810845733
1730	0.000472593861824485
1731	0.000476063046352206
1732	0.000479552300091101
1733	0.000483058663205761
1734	0.000486579034010956
1735	0.000490110339862258
1736	0.000493649494943939
1737	0.000497193441811013
1738	0.00050073913704611
1739	0.000504283477832093
1740	0.000507823353152246
1741	0.000511355574591497
1742	0.000514876988349691
1743	0.00051838444226681
1744	0.000521874839151545
1745	0.000525345063702605
1746	0.000528792093842774
1747	0.000532212845180053
1748	0.000535604289847541
1749	0.000538963385260144
1750	0.000542287111761173
1751	0.000545572460434289
1752	0.00054881648494615
1753	0.000552016365620185
1754	0.00055516927434603
1755	0.000558272484360766
1756	0.000561323227844108
1757	0.000564318819669515
1758	0.00056725662909341
1759	0.000570134083933334
1760	0.000572948649260996
1761	0.000575697916269807
1762	0.000578379570084134
1763	0.000580991388595132
1764	0.000583531178124491
1765	0.000585996797917229
1766	0.000588386239052398
1767	0.000590697531355684
1768	0.000592928849882593
1769	0.000595078395342685
1770	0.000597144556733495
1771	0.000599125795952949
1772	0.000601020683408957
1773	0.000602827813249913
1774	0.000604545945924217
1775	0.000606173910429172
1776	0.000607710624998817
1777	0.000609155159332407
1778	0.000610506684542553
1779	0.000611764468099306
1780	0.000612927887380907
1781	0.000613996438849639
1782	0.000614969656997153
1783	0.00061584722612712
1784	0.00061662890281979
1785	0.000617314573879145
1786	0.000617904216989595
1787	0.000618397937166592
1788	0.000618795882202446
1789	0.000619098348349384
1790	0.000619305662772932
1791	0.000619418272372496
1792	0.000619436713274952
1793	0.000619361596645176
1794	0.000619193630218742
1795	0.000618933578614507
1796	0.00061858238203249
1797	0.00061814091898411
1798	0.000617610275326783
1799	0.000616991519516879
1800	0.000616285827716406
1801	0.000615494467784196
1802	0.000614618759018848
1803	0.00061366013715595
1804	0.000612620030339092
1805	0.000611500014962614
1806	0.000610301733898486
1807	0.000609026826084946
1808	0.000607677045116297
1809	0.000606254241620691
1810	0.00060476023213874
1811	0.000603197014823284
1812	0.000601566603650664
1813	0.000599871070960181
1814	0.000598112512876996
1815	0.000596293140167691
1816	0.00059441518345512
1817	0.000592480922888766
1818	0.000590492739515967
1819	0.000588452998135512
1820	0.000586364133074375
1821	0.000584228668122465
1822	0.000582049111073665
1823	0.000579828019392954
1824	0.000577568041467528
1825	0.000575271738339074
1826	0.000572941878144983
1827	0.000570581026507062
1828	0.00056819201917703
1829	0.000565777598922752
1830	0.000563340479499002
1831	0.000560883554697217
1832	0.000558409531829388
1833	0.000555921265496222
1834	0.000553421624876641
1835	0.000550913334455836
1836	0.000548399364929516
1837	0.000545882572817737
1838	0.000543365701390053
1839	0.000540851628712762
1840	0.000538343225102749
1841	0.000535843308485523
1842	0.000533354636864823
1843	0.000530879948948939
1844	0.000528422068884542
1845	0.000525983710221858
1846	0.000523567648669426
1847	0.000521176440137273
1848	0.000518812800246259
1849	0.000516479325034215
1850	0.000514178508736663
1851	0.000511912874044313
1852	0.000509684925398941
1853	0.000507497026309581
1854	0.000505351604834879
1855	0.000503250922155394
1856	0.000501197276993716
1857	0.000499192864808578
1858	0.000497239812986859
1859	0.000495340233307711
1860	0.000493496143979439
1861	0.000491709501136828
1862	0.000489982226158879
1863	0.000488316220146612
1864	0.000486713214240174
1865	0.000485174984042516
1866	0.000483703134523355
1867	0.000482299254569227
1868	0.00048096489398491
1869	0.000479701542183932
1870	0.000478510553781356
1871	0.000477393291259538
1872	0.000476351001679704
1873	0.00047538486210144
1874	0.0004744960277087
1875	0.000473685428575542
1876	0.000472954085762637
1877	0.000472302906592248
1878	0.000471732713542651
1879	0.000471244236494022
1880	0.000470838167627724
1881	0.000470515084609986
1882	0.000470275479406287
1883	0.000470119812995431
1884	0.000470048418000103
1885	0.00047006157589356
1886	0.000470159506655081
1887	0.000470342334464149
1888	0.000470610115655543
1889	0.000470962836701136
1890	0.000471400370816248
1891	0.000471922548233335
1892	0.000472528988130682
1893	0.000473219473125677
1894	0.000473993543331571
1895	0.000474850681669944
1896	0.000475790339151063
1897	0.000476811836472147
1898	0.0004779144541271
1899	0.000479097334020518
1900	0.000480359625533153
1901	0.000481700276652385
1902	0.000483118300657855
1903	0.000484612553166775
1904	0.000486181857313907
1905	0.000487824896742962
1906	0.00048954036798922
1907	0.00049132682089858
1908	0.000493182750275986
1909	0.00049510658498485
1910	0.000497096685566677
1911	0.00049915135114077
1912	0.00050126880889833
1913	0.00050344724370905
1914	0.000505684757415586
1915	0.000507979389214793
1916	0.000510329114177165
1917	0.000512731852551971
1918	0.000515185474570159
1919	0.000517687806187044
1920	0.00052023662682376
1921	0.000522829664412453
1922	0.000525464608522121
1923	0.000528139086000783
1924	0.000530850684093562
1925	0.000533596953098069
1926	0.000536375407994144
1927	0.000539183526089154
1928	0.000542018775059549
1929	0.000544878590036715
1930	0.000547760376621041
1931	0.000550661511396345
1932	0.000553579339111755
1933	0.000556511192021857
1934	0.000559454384988649
1935	0.00056240622745595
1936	0.000565364019102154
1937	0.000568325066319824
1938	0.000571286664590218
1939	0.000574246108738621
1940	0.000577200675385982
1941	0.000580147655025581
1942	0.000583084340039408
1943	0.000586008039892579
1944	0.000588916083786833
1945	0.000591805823821462
1946	0.000594674630021967
1947	0.000597519888949919
1948	0.000600339013917247
1949	0.000603129428606371
1950	0.000605888603104471
1951	0.000608614031559606
1952	0.000611303257477371
1953	0.00061395386945368
1954	0.000616563505737256
1955	0.000619129831625272
1956	0.000621650563197946
1957	0.000624123459109474
1958	0.00062654633248541
1959	0.000628917053738627
1960	0.000631233544508656
1961	0.000633493801937806
1962	0.000635695887245856
1963	0.000637837929187918
1964	0.000639918103477246
1965	0.000641934650104787
1966	0.000643885886908241
1967	0.000645770203229782
1968	0.000647586053092977
1969	0.000649331981979164
1970	0.000651006610897237
1971	0.000652608636101611
1972	0.000654136826847642
1973	0.00065559003009921
1974	0.000656967166046534
1975	0.000658267234162435
1976	0.000659489332818901
1977	0.000660632624603891
1978	0.000661696379494238
1979	0.000662679933529061
1980	0.000663582709097634
1981	0.000664404205422437
1982	0.000665144005858717
1983	0.000665801766821442
1984	0.000666377229704202
1985	0.000666870236665229
1986	0.000667280694226481
1987	0.000667608600944276
1988	0.000667854032035536
1989	0.000668017133547196
1990	0.000668098129901441
1991	0.000668097328331923
1992	0.000668015102241098
1993	0.00066785192027686
1994	0.00066760831027349
1995	0.000667284894081312
1996	0.000666882355947329
1997	0.000666401448313532
1998	0.000665843006464865
1999	0.000665207913766677
2000	0.000664497141640558
2001	0.000663711733855588
2002	0.000662852794776646
2003	0.00066192150253424
2004	0.000660919098580514
2005	0.000659846883710765
2006	0.000658706225501571
2007	0.000657498547248624
2008	0.000656225345479931
2009	0.000654888153217835
2010	0.000653488591352166
2011	0.000652028319019053
2012	0.000650509049011147
2013	0.00064893257358971
2014	0.000647300688106065
2015	0.000645615265359708
2016	0.000643878225225093
2017	0.000642091520165017
2018	0.000640257164163429
2019	0.000638377197155423
2020	0.000636453706962931
2021	0.000634488824554557
2022	0.000632484683677518
2023	0.000630443487322877
2024	0.000628367445265781
2025	0.000626258799654751
2026	0.000624119835412785
2027	0.000621952820831608
2028	0.000619760095023157
2029	0.000617543985099786
2030	0.000615306841526192
2031	0.00061305102368976
2032	0.000610778903857784
2033	0.000608492868342745
2034	0.000606195294482646
2035	0.000603888580585811
2036	0.000601575137022118
2037	0.000599257336942158
2038	0.000596937584680497
2039	0.000594618243904124
2040	0.000592301693359018
2041	0.000589990313326707
2042	0.000587686423404625
2043	0.000585392362326068
2044	0.000583110452547274
2045	0.000580842986245773
2046	0.000578592223976279
2047	0.000576360413702743
2048	0.00057414976766338
2049	0.000571962470788927
2050	0.000569800672879844
2051	0.000567666493088082
2052	0.000565562015608216
2053	0.000563489286008548
2054	0.000561450318962069
2055	0.00055944707716375
2056	0.00055748148441631
2057	0.000555555411598288
2058	0.000553670711039283
2059	0.000551829153866232
2060	0.000550032496678184
2061	0.000548282436026378
2062	0.000546580600405373
2063	0.000544928595328798
2064	0.000543327959554939
2065	0.00054178016985361
2066	0.000540286658536065
2067	0.000538848800451079
2068	0.000537467913212519
2069	0.000536145269629969
2070	0.000534882067567282
2071	0.000533679443044604
2072	0.000532538478536301
2073	0.000531460206649152
2074	0.000530445562331704
2075	0.000529495451089493
2076	0.000528610693269384
2077	0.000527792063108873
2078	0.00052704027395233
2079	0.000526355948287586
2080	0.00052573966465016
2081	0.000525191919326008
2082	0.000524713148064052
2083	0.000524303718509806
2084	0.000523963931112284
2085	0.000523694024248842
2086	0.000523494174296037
2087	0.00052336446538048
2088	0.000523304941082647
2089	0.000523315562972464
2090	0.000523396224955227
2091	0.000523546749131824
2092	0.00052376689304429
2093	0.000524056356542533
2094	0.000524414765228641
2095	0.000524841689879889
2096	0.000525336609311969
2097	0.000525898954875354
2098	0.000526528092483186
2099	0.00052722330523899
2100	0.000527983822448326
2101	0.000528808819764994
2102	0.000529697399055191
2103	0.000530648608791722
2104	0.000531661428931773
2105	0.000532734774134834
2106	0.000533867513258407
2107	0.000535058442968213
2108	0.000536306311792931
2109	0.000537609803031547
2110	0.00053896756200232
2111	0.000540378171638074
2112	0.000541840170804535
2113	0.000543352036176774
2114	0.000544912206369608
2115	0.000546519061556602
2116	0.000548170946956136
2117	0.000549866162352319
2118	0.000551602970417661
2119	0.00055337958719064
2120	0.000555194196501741
2121	0.000557044948591038
[truncated: 12,880 more rows]
