# Supplementary material for: Non-coding cancer driver candidates identified with a sample- and position-specific model of the somatic mutation rate
Source: eLife journal article supplement (doi:10.7554/elife.21778), 2017-03-31
Supplement: supp [file elife-21778-supp-v2.zip › elife_poa_e21778_Figure_5_figure_supplement_1_source_data_1.txt]

region_type	id	p
cds	chr10_gencode_A1CF_ENSG00000148584.10	0.655095720405365
cds	chr10_gencode_ABCC2_ENSG00000023839.6	0.640350655115007
cds	chr10_gencode_ABI1_ENSG00000136754.12	0.515758626927945
cds	chr10_gencode_ABLIM1_ENSG00000099204.14	0.964538470870504
cds	chr10_gencode_AC022400.2_ENSG00000267964.1	0.999999999999942
cds	chr10_gencode_AC022532.1_ENSG00000197604.4	0.57265550149592
cds	chr10_gencode_AC069547.1_ENSG00000269165.1	0.106203307662634
cds	chr10_gencode_AC069547.2_ENSG00000269700.1	0.361828889739478
cds	chr10_gencode_ACADSB_ENSG00000196177.8	0.900236584612051
cds	chr10_gencode_ACBD5_ENSG00000107897.14	0.979137510582809
cds	chr10_gencode_ACBD7_ENSG00000176244.6	0.21621808720077
cds	chr10_gencode_ACSL5_ENSG00000197142.6	0.368889773841469
cds	chr10_gencode_ACTA2_ENSG00000107796.8	0.339159063312875
cds	chr10_gencode_ACTR1A_ENSG00000138107.7	0.519091122541531
cds	chr10_gencode_ADAM12_ENSG00000148848.10	0.0968829699209191
cds	chr10_gencode_ADAM8_ENSG00000151651.11	0.995853835170077
cds	chr10_gencode_ADAMTS14_ENSG00000138316.6	0.97873428137285
cds	chr10_gencode_ADARB2_ENSG00000185736.11	0.985340352932726
cds	chr10_gencode_ADD3_ENSG00000148700.9	0.827782273409233
cds	chr10_gencode_ADIRF_ENSG00000148671.9	0.00850433025674195
cds	chr10_gencode_ADK_ENSG00000156110.9	0.936851238013655
cds	chr10_gencode_ADO_ENSG00000181915.3	0.998215137654732
cds	chr10_gencode_ADRA2A_ENSG00000150594.5	0.999395933574643
cds	chr10_gencode_ADRB1_ENSG00000043591.4	0.999947232832884
cds	chr10_gencode_AFAP1L2_ENSG00000169129.10	0.827773561686367
cds	chr10_gencode_AGAP10_ENSG00000204172.7	1
cds	chr10_gencode_AGAP4_ENSG00000188234.9	1
cds	chr10_gencode_AGAP5_ENSG00000172650.8	1
cds	chr10_gencode_AGAP6_ENSG00000204149.5	0.998729629051324
cds	chr10_gencode_AGAP7_ENSG00000204169.6	0.998184758178305
cds	chr10_gencode_AGAP8_ENSG00000174194.11	0.985699195066203
cds	chr10_gencode_AGAP9_ENSG00000198035.9	0.999999999999799
cds	chr10_gencode_AIFM2_ENSG00000042286.10	0.0865948045013927
cds	chr10_gencode_AKR1C1_ENSG00000187134.8	0.884736008475772
cds	chr10_gencode_AKR1C2_ENSG00000151632.12	0.910293199443891
cds	chr10_gencode_AKR1C3_ENSG00000196139.7	0.460848961566874
cds	chr10_gencode_AKR1C4_ENSG00000198610.6	0.94012978990651
cds	chr10_gencode_AKR1CL1_ENSG00000196326.6	0.438284468452492
cds	chr10_gencode_AKR1E2_ENSG00000165568.13	0.438932808357967
cds	chr10_gencode_AL133481.1_ENSG00000235705.4	0.374361608164967
cds	chr10_gencode_AL137026.1_ENSG00000269515.1	0.999999999999987
cds	chr10_gencode_AL138764.1_ENSG00000226209.1	0.999999999999995
cds	chr10_gencode_AL161645.2_ENSG00000268925.1	0.999999999999986
cds	chr10_gencode_AL162407.1_ENSG00000234631.1	0.356493476478044
cds	chr10_gencode_AL353583.1_ENSG00000269879.1	1
cds	chr10_gencode_AL355490.1_ENSG00000224474.2	0.999999999999992
cds	chr10_gencode_AL355531.2_ENSG00000268421.1	0.901492466007284
cds	chr10_gencode_AL359195.1_ENSG00000204038.3	0.350138320725679
cds	chr10_gencode_AL359878.1_ENSG00000205740.1	1
cds	chr10_gencode_AL360181.1_ENSG00000268882.1	0.536698804504651
cds	chr10_gencode_AL391421.1_ENSG00000204049.1	1
cds	chr10_gencode_AL450307.1_ENSG00000189275.3	0.644455417084674
cds	chr10_gencode_AL591684.1_ENSG00000215020.3	0.999999999999958
cds	chr10_gencode_AL603965.1_ENSG00000215033.3	0.503231714214834
cds	chr10_gencode_ALDH18A1_ENSG00000059573.4	0.99414732367568
cds	chr10_gencode_ALOX5_ENSG00000012779.6	0.951884526301081
cds	chr10_gencode_ANAPC16_ENSG00000166295.4	0.999999999999965
cds	chr10_gencode_ANK3_ENSG00000151150.16	0.967802497730145
cds	chr10_gencode_ANKRD16_ENSG00000134461.11	0.715647617232918
cds	chr10_gencode_ANKRD1_ENSG00000148677.6	0.485065438484991
cds	chr10_gencode_ANKRD22_ENSG00000152766.5	0.809050403974945
cds	chr10_gencode_ANKRD26_ENSG00000107890.12	0.850882402904556
cds	chr10_gencode_ANKRD2_ENSG00000165887.7	0.676209734510242
cds	chr10_gencode_ANKRD30A_ENSG00000148513.13	0.366968091691775
cds	chr10_gencode_ANTXRL_ENSG00000198250.8	0.229085244904027
cds	chr10_gencode_ANXA11_ENSG00000122359.13	0.888025598573139
cds	chr10_gencode_ANXA7_ENSG00000138279.11	0.29151143785641
cds	chr10_gencode_ANXA8L1_ENSG00000150165.13	0.999999999999876
cds	chr10_gencode_ANXA8L2_ENSG00000186807.9	0.913036529365654
cds	chr10_gencode_ANXA8_ENSG00000165390.11	0.999999999999948
cds	chr10_gencode_AP3M1_ENSG00000185009.8	0.660650173017364
cds	chr10_gencode_APBB1IP_ENSG00000077420.11	0.506559900147885
cds	chr10_gencode_ARHGAP12_ENSG00000165322.13	0.194928889062736
cds	chr10_gencode_ARHGAP19-SLIT1_ENSG00000269891.1	0.704068738477886
cds	chr10_gencode_ARHGAP19_ENSG00000213390.6	0.660558310274464
cds	chr10_gencode_ARHGAP21_ENSG00000107863.12	0.961511715819007
cds	chr10_gencode_ARHGAP22_ENSG00000128805.10	0.14393811693407
cds	chr10_gencode_ARID5B_ENSG00000150347.10	0.738504793170156
cds	chr10_gencode_ARL3_ENSG00000138175.8	0.395331164876072
cds	chr10_gencode_ARL5B_ENSG00000165997.4	1
cds	chr10_gencode_ARMC3_ENSG00000165309.9	0.665646897074613
cds	chr10_gencode_ARMC4_ENSG00000169126.11	0.000509007236313275
cds	chr10_gencode_ARMS2_ENSG00000254636.1	0.3147360162018
cds	chr10_gencode_AS3MT_ENSG00000214435.3	0.398504395838738
cds	chr10_gencode_ASAH2B_ENSG00000204147.5	0.92388712275917
cds	chr10_gencode_ASAH2C_ENSG00000072444.10	0.976765551466191
cds	chr10_gencode_ASAH2_ENSG00000188611.10	0.908550356112805
cds	chr10_gencode_ASB13_ENSG00000196372.8	0.571125477584632
cds	chr10_gencode_ASCC1_ENSG00000138303.13	0.573689446386564
cds	chr10_gencode_ATAD1_ENSG00000138138.9	0.999999999999967
cds	chr10_gencode_ATE1_ENSG00000107669.13	0.595548126037832
cds	chr10_gencode_ATOH7_ENSG00000179774.7	1
cds	chr10_gencode_ATP5C1_ENSG00000165629.15	0.536228855695242
cds	chr10_gencode_ATRNL1_ENSG00000107518.12	0.87186502776064
cds	chr10_gencode_AVPI1_ENSG00000119986.6	0.112573136385187
cds	chr10_gencode_BAG3_ENSG00000151929.5	0.98440810557158
cds	chr10_gencode_BAMBI_ENSG00000095739.7	0.532030233166063
cds	chr10_gencode_BBIP1_ENSG00000214413.3	0.124090827529627
cds	chr10_gencode_BCCIP_ENSG00000107949.12	0.192103781202338
cds	chr10_gencode_BEND7_ENSG00000165626.12	0.763420705969301
cds	chr10_gencode_BICC1_ENSG00000122870.7	0.384876968821749
cds	chr10_gencode_BLNK_ENSG00000095585.12	0.995420668327159
cds	chr10_gencode_BLOC1S2_ENSG00000196072.7	0.596085060691194
cds	chr10_gencode_BMI1_ENSG00000168283.9	0.891705767512887
cds	chr10_gencode_BMPR1A_ENSG00000107779.7	0.88219430352877
cds	chr10_gencode_BMS1_ENSG00000165733.7	0.980996234063519
cds	chr10_gencode_BNIP3_ENSG00000176171.7	0.912060587580785
cds	chr10_gencode_BTAF1_ENSG00000095564.9	0.628287864100154
cds	chr10_gencode_BTBD16_ENSG00000138152.7	0.759590713615391
cds	chr10_gencode_BTRC_ENSG00000166167.13	0.586386788907654
cds	chr10_gencode_BUB3_ENSG00000154473.13	0.855729746835471
cds	chr10_gencode_C10orf105_ENSG00000214688.4	0.704313388814106
cds	chr10_gencode_C10orf107_ENSG00000183346.6	0.923312485701434
cds	chr10_gencode_C10orf10_ENSG00000165507.8	0.774750146446701
cds	chr10_gencode_C10orf111_ENSG00000176236.4	0.199551053500763
cds	chr10_gencode_C10orf112_ENSG00000204740.5	0.563974848565528
cds	chr10_gencode_C10orf113_ENSG00000204683.6	0.37828741093587
cds	chr10_gencode_C10orf115_ENSG00000204566.6	0.193153282158075
cds	chr10_gencode_C10orf118_ENSG00000165813.12	0.885597585025151
cds	chr10_gencode_C10orf11_ENSG00000148655.10	0.881533703437812
cds	chr10_gencode_C10orf120_ENSG00000183559.7	0.733671593462486
cds	chr10_gencode_C10orf126_ENSG00000204365.2	0.749540560471844
cds	chr10_gencode_C10orf128_ENSG00000204161.9	0.833948805824601
cds	chr10_gencode_C10orf129_ENSG00000173124.10	0.360244105411683
cds	chr10_gencode_C10orf12_ENSG00000155640.5	0.956486764968246
cds	chr10_gencode_C10orf131_ENSG00000173088.8	0.025525668584086
cds	chr10_gencode_C10orf137_ENSG00000107938.13	0.907125151425123
cds	chr10_gencode_C10orf25_ENSG00000165511.4	0.373070155891581
cds	chr10_gencode_C10orf2_ENSG00000107815.3	0.99848781987655
cds	chr10_gencode_C10orf32_ENSG00000166275.11	0.999999999999985
cds	chr10_gencode_C10orf35_ENSG00000171224.7	0.822223821326568
cds	chr10_gencode_C10orf40_ENSG00000235931.2	0.516501541065141
cds	chr10_gencode_C10orf53_ENSG00000178645.8	0.53178677750237
cds	chr10_gencode_C10orf54_ENSG00000107738.15	0.491947048061796
cds	chr10_gencode_C10orf55_ENSG00000222047.4	0.999999999999997
cds	chr10_gencode_C10orf62_ENSG00000203942.3	0.571003995935271
cds	chr10_gencode_C10orf67_ENSG00000179133.7	1
cds	chr10_gencode_C10orf68_ENSG00000150076.18	0.822292903998563
cds	chr10_gencode_C10orf71_ENSG00000177354.7	0.930280911628864
cds	chr10_gencode_C10orf76_ENSG00000120029.8	0.701376852326349
cds	chr10_gencode_C10orf82_ENSG00000165863.12	0.968498784058834
cds	chr10_gencode_C10orf85_ENSG00000177234.5	0.672062820233869
cds	chr10_gencode_C10orf88_ENSG00000119965.8	0.792857286488103
cds	chr10_gencode_C10orf90_ENSG00000154493.13	0.919146126230043
cds	chr10_gencode_C10orf91_ENSG00000180066.5	0.885077893616309
cds	chr10_gencode_C10orf95_ENSG00000120055.5	0.993925642299529
cds	chr10_gencode_C10orf99_ENSG00000188373.4	0.36491938812119
cds	chr10_gencode_C1QL3_ENSG00000165985.8	0.943505315065864
cds	chr10_gencode_CACNB2_ENSG00000165995.14	0.461743142887293
cds	chr10_gencode_CACUL1_ENSG00000151893.10	0.650887067028703
cds	chr10_gencode_CALHM1_ENSG00000185933.6	0.65435541248205
cds	chr10_gencode_CALHM2_ENSG00000138172.6	0.572478645005765
cds	chr10_gencode_CALHM3_ENSG00000183128.7	0.824882936865465
cds	chr10_gencode_CALML3_ENSG00000178363.3	0.85039363714927
cds	chr10_gencode_CALML5_ENSG00000178372.6	0.00770019790001799
cds	chr10_gencode_CALY_ENSG00000130643.4	0.958381603855552
cds	chr10_gencode_CAMK1D_ENSG00000183049.8	0.173354206388561
cds	chr10_gencode_CAMK2G_ENSG00000148660.16	0.650498681253551
cds	chr10_gencode_CASC10_ENSG00000204682.5	0.719239459093208
cds	chr10_gencode_CASP7_ENSG00000165806.15	0.587761445675414
cds	chr10_gencode_CC2D2B_ENSG00000188649.7	0.932014289363651
cds	chr10_gencode_CCAR1_ENSG00000060339.9	0.966808895426273
cds	chr10_gencode_CCDC147_ENSG00000120051.10	0.657012064535745
cds	chr10_gencode_CCDC172_ENSG00000182645.5	0.999999999999914
cds	chr10_gencode_CCDC3_ENSG00000151468.9	0.252840325269257
cds	chr10_gencode_CCDC6_ENSG00000108091.10	0.910882465861148
cds	chr10_gencode_CCDC7_ENSG00000216937.7	0.88293439325071
cds	chr10_gencode_CCNJ_ENSG00000107443.11	0.966414009794783
cds	chr10_gencode_CCNY_ENSG00000108100.13	0.718134407675182
cds	chr10_gencode_CCSER2_ENSG00000107771.11	0.996267395245264
cds	chr10_gencode_CDC123_ENSG00000151465.9	0.368477050600539
cds	chr10_gencode_CDH23_ENSG00000107736.15	0.152121365068454
cds	chr10_gencode_CDHR1_ENSG00000148600.10	0.791508586807288
cds	chr10_gencode_CDK1_ENSG00000170312.11	0.342056188987965
cds	chr10_gencode_CDNF_ENSG00000185267.5	0.468571278651361
cds	chr10_gencode_CELF2_ENSG00000048740.13	0.999671709033988
cds	chr10_gencode_CEP55_ENSG00000138180.11	0.399974874718908
cds	chr10_gencode_CH25H_ENSG00000138135.5	0.866946163860135
cds	chr10_gencode_CHAT_ENSG00000070748.13	0.846143807652115
cds	chr10_gencode_CHCHD1_ENSG00000172586.7	0.629977480129374
cds	chr10_gencode_CHST15_ENSG00000182022.13	0.887012482529369
cds	chr10_gencode_CHST3_ENSG00000122863.5	0.124565109620031
cds	chr10_gencode_CHUK_ENSG00000213341.6	0.73333639760314
cds	chr10_gencode_CISD1_ENSG00000122873.7	0.409013620191334
cds	chr10_gencode_CLRN3_ENSG00000180745.4	0.895454980706988
cds	chr10_gencode_CNNM1_ENSG00000119946.9	0.999957326650941
cds	chr10_gencode_CNNM2_ENSG00000148842.13	0.598800788017429
cds	chr10_gencode_COL13A1_ENSG00000197467.9	0.19494358584621
cds	chr10_gencode_COL17A1_ENSG00000065618.12	0.36667362356222
cds	chr10_gencode_COMMD3-BMI1_ENSG00000269897.1	0.978639716385442
cds	chr10_gencode_COMMD3_ENSG00000148444.11	0.999999999999981
cds	chr10_gencode_COMTD1_ENSG00000165644.6	0.901655036675557
cds	chr10_gencode_COX15_ENSG00000014919.8	0.154196447776522
cds	chr10_gencode_CPEB3_ENSG00000107864.10	0.97486163333066
cds	chr10_gencode_CPN1_ENSG00000120054.7	0.610874298351479
cds	chr10_gencode_CPXM2_ENSG00000121898.8	0.985571840597364
cds	chr10_gencode_CREM_ENSG00000095794.15	0.784047893951535
cds	chr10_gencode_CRTAC1_ENSG00000095713.9	0.276065439585534
cds	chr10_gencode_CSGALNACT2_ENSG00000169826.6	0.639002670653617
cds	chr10_gencode_CSTF2T_ENSG00000177613.7	0.997990957170919
cds	chr10_gencode_CTBP2_ENSG00000175029.12	0.958042294399507
cds	chr10_gencode_CTNNA3_ENSG00000183230.12	0.933831799483542
cds	chr10_gencode_CUBN_ENSG00000107611.10	0.999299671360437
cds	chr10_gencode_CUEDC2_ENSG00000107874.6	0.0322170576601373
cds	chr10_gencode_CUL2_ENSG00000108094.10	0.838912069781392
cds	chr10_gencode_CUTC_ENSG00000119929.8	0.200205393531401
cds	chr10_gencode_CUZD1_ENSG00000138161.8	0.096089988232773
cds	chr10_gencode_CWF19L1_ENSG00000095485.12	0.890243316761455
cds	chr10_gencode_CXCL12_ENSG00000107562.12	0.597425765400443
cds	chr10_gencode_CYP17A1_ENSG00000148795.5	0.906838154492873
cds	chr10_gencode_CYP26A1_ENSG00000095596.7	0.955490945524474
cds	chr10_gencode_CYP26C1_ENSG00000187553.5	0.999399889998158
cds	chr10_gencode_CYP2C18_ENSG00000108242.8	0.0774756145745811
cds	chr10_gencode_CYP2C19_ENSG00000165841.5	0.0383282672722937
cds	chr10_gencode_CYP2C8_ENSG00000138115.9	0.267000780158936
cds	chr10_gencode_CYP2C9_ENSG00000138109.9	0.369154816485322
cds	chr10_gencode_CYP2E1_ENSG00000130649.5	0.0389235929791976
cds	chr10_gencode_DCLRE1A_ENSG00000198924.3	0.994626074345121
cds	chr10_gencode_DCLRE1C_ENSG00000152457.13	0.0346425929379778
cds	chr10_gencode_DDIT4_ENSG00000168209.4	0.803901961857439
cds	chr10_gencode_DDX21_ENSG00000165732.8	0.537787724416282
cds	chr10_gencode_DDX50_ENSG00000107625.8	0.791570305491078
cds	chr10_gencode_DHTKD1_ENSG00000181192.7	0.213898289904427
cds	chr10_gencode_DHX32_ENSG00000089876.7	0.598388478182873
cds	chr10_gencode_DIP2C_ENSG00000151240.11	0.983988967114378
cds	chr10_gencode_DKFZP667F0711_ENSG00000212743.1	0.884998029711869
cds	chr10_gencode_DKK1_ENSG00000107984.5	0.515957021532209
cds	chr10_gencode_DLG5_ENSG00000151208.12	0.993111766180441
cds	chr10_gencode_DMBT1_ENSG00000187908.11	0.494439280161345
cds	chr10_gencode_DNA2_ENSG00000138346.10	0.980757862608782
cds	chr10_gencode_DNAJB12_ENSG00000148719.10	1
cds	chr10_gencode_DNAJC12_ENSG00000108176.10	0.463156657401826
cds	chr10_gencode_DNAJC1_ENSG00000136770.6	0.906844528635764
cds	chr10_gencode_DNAJC9_ENSG00000213551.4	0.211831428774082
cds	chr10_gencode_DNMBP_ENSG00000107554.11	0.18478656718736
cds	chr10_gencode_DNTT_ENSG00000107447.4	0.979262268902375
cds	chr10_gencode_DOCK1_ENSG00000150760.8	0.987913649921671
cds	chr10_gencode_DPCD_ENSG00000166171.8	0.782408916362671
cds	chr10_gencode_DPYSL4_ENSG00000151640.8	0.811643834286322
cds	chr10_gencode_DRGX_ENSG00000165606.4	0.475906284822328
cds	chr10_gencode_DUPD1_ENSG00000188716.5	0.932271828769376
cds	chr10_gencode_DUSP13_ENSG00000079393.16	0.685941375113155
cds	chr10_gencode_DUSP5_ENSG00000138166.5	0.896779197443214
cds	chr10_gencode_DYDC1_ENSG00000170788.9	0.804851117077309
cds	chr10_gencode_DYDC2_ENSG00000133665.8	0.289476163345317
cds	chr10_gencode_EBF3_ENSG00000108001.9	0.754887232869176
cds	chr10_gencode_EBLN1_ENSG00000223601.2	0.682807034031341
cds	chr10_gencode_ECD_ENSG00000122882.6	0.758388418887854
cds	chr10_gencode_ECHDC3_ENSG00000134463.10	0.692424296771277
cds	chr10_gencode_ECHS1_ENSG00000127884.4	0.510077636290455
cds	chr10_gencode_EGR2_ENSG00000122877.9	0.654507832802267
cds	chr10_gencode_EIF3A_ENSG00000107581.8	0.992325463399821
cds	chr10_gencode_EIF4EBP2_ENSG00000148730.6	0.999999999999988
cds	chr10_gencode_EIF5AL1_ENSG00000253626.2	1
cds	chr10_gencode_ELOVL3_ENSG00000119915.4	0.806717815895613
cds	chr10_gencode_EMX2_ENSG00000170370.10	0.984785249431381
cds	chr10_gencode_ENKUR_ENSG00000151023.12	0.525192986232206
cds	chr10_gencode_ENO4_ENSG00000188316.9	0.84981401909345
cds	chr10_gencode_ENTPD1_ENSG00000138185.12	0.668175919712078
cds	chr10_gencode_ENTPD7_ENSG00000198018.6	0.745364954454202
cds	chr10_gencode_EPC1_ENSG00000120616.11	0.71246103146228
cds	chr10_gencode_ERCC6-PGBD3_ENSG00000258838.1	0.527429506334834
cds	chr10_gencode_ERCC6_ENSG00000225830.6	0.0825469166554618
cds	chr10_gencode_ERLIN1_ENSG00000107566.9	0.0593578460616227
cds	chr10_gencode_EXOC6_ENSG00000138190.12	0.725901764418485
cds	chr10_gencode_EXOSC1_ENSG00000171311.8	1
cds	chr10_gencode_FAM107B_ENSG00000065809.9	0.232420767558924
cds	chr10_gencode_FAM13C_ENSG00000148541.8	0.112238688202309
cds	chr10_gencode_FAM149B1_ENSG00000138286.10	0.817780595313333
cds	chr10_gencode_FAM160B1_ENSG00000151553.10	0.742999782358214
cds	chr10_gencode_FAM170B_ENSG00000172538.6	0.87472494907896
cds	chr10_gencode_FAM171A1_ENSG00000148468.12	0.466080956816497
cds	chr10_gencode_FAM175B_ENSG00000165660.7	0.685700142962177
cds	chr10_gencode_FAM178A_ENSG00000119906.7	0.63583771045927
cds	chr10_gencode_FAM188A_ENSG00000148481.9	0.870996554728701
cds	chr10_gencode_FAM196A_ENSG00000188916.4	0.945174286302203
cds	chr10_gencode_FAM204A_ENSG00000165669.9	0.880156763646438
cds	chr10_gencode_FAM208B_ENSG00000108021.15	0.990397781029167
cds	chr10_gencode_FAM213A_ENSG00000122378.9	0.857286866575644
cds	chr10_gencode_FAM21A_ENSG00000099290.11	0.999910309415925
cds	chr10_gencode_FAM21B_ENSG00000152726.14	0.999999988848424
cds	chr10_gencode_FAM21C_ENSG00000172661.13	0.990094720204492
cds	chr10_gencode_FAM21D_ENSG00000174196.5	0.999999999999931
cds	chr10_gencode_FAM24A_ENSG00000203795.2	0.612832753130813
cds	chr10_gencode_FAM24B_ENSG00000213185.2	0.999999999999996
cds	chr10_gencode_FAM25A_ENSG00000188100.8	1
cds	chr10_gencode_FAM25B_ENSG00000189090.7	0.999999999999988
cds	chr10_gencode_FAM25C_ENSG00000188279.7	0.659940312537716
cds	chr10_gencode_FAM25E_ENSG00000231122.3	0.999999999999887
cds	chr10_gencode_FAM25G_ENSG00000197910.7	0.999999999999986
cds	chr10_gencode_FAM35A_ENSG00000122376.7	0.435053162353797
cds	chr10_gencode_FAM45A_ENSG00000119979.11	0.410843479183851
cds	chr10_gencode_FAM53B_ENSG00000189319.9	0.494138460632515
cds	chr10_gencode_FANK1_ENSG00000203780.6	0.895825708887524
cds	chr10_gencode_FAS_ENSG00000026103.15	0.0148268729564651
cds	chr10_gencode_FBXL15_ENSG00000107872.8	0.986583510315017
cds	chr10_gencode_FBXO18_ENSG00000134452.15	0.440683341810602
cds	chr10_gencode_FBXW4_ENSG00000107829.9	0.877927352026589
cds	chr10_gencode_FFAR4_ENSG00000186188.6	0.942885713831432
cds	chr10_gencode_FGF8_ENSG00000107831.8	0.945577214176927
cds	chr10_gencode_FGFBP3_ENSG00000174721.9	0.983814437603459
cds	chr10_gencode_FGFR2_ENSG00000066468.16	0.71429541849329
cds	chr10_gencode_FOXI2_ENSG00000186766.7	0.959815937369447
cds	chr10_gencode_FRA10AC1_ENSG00000148690.10	0.761529246976156
cds	chr10_gencode_FRAT1_ENSG00000165879.7	0.983156301451321
cds	chr10_gencode_FRAT2_ENSG00000181274.5	1
cds	chr10_gencode_FRG2B_ENSG00000225899.3	1.74948594770848e-06
cds	chr10_gencode_FRMD4A_ENSG00000151474.15	0.999893694062214
cds	chr10_gencode_FRMPD2_ENSG00000170324.15	0.183496901715212
cds	chr10_gencode_FUOM_ENSG00000148803.7	0.904304498164028
cds	chr10_gencode_FUT11_ENSG00000196968.6	0.999999999999713
cds	chr10_gencode_FXYD4_ENSG00000150201.10	0.99999999999998
cds	chr10_gencode_FZD8_ENSG00000177283.4	0.999999798519444
cds	chr10_gencode_GAD2_ENSG00000136750.7	0.986785124440402
cds	chr10_gencode_GATA3_ENSG00000107485.11	0.930080672132424
cds	chr10_gencode_GBF1_ENSG00000107862.4	0.676307459495209
cds	chr10_gencode_GDF10_ENSG00000107623.4	0.629358283304711
cds	chr10_gencode_GDF2_ENSG00000128802.3	0.332646164827083
cds	chr10_gencode_GDI2_ENSG00000057608.12	0.320292027934065
cds	chr10_gencode_GFRA1_ENSG00000151892.10	0.9489683333624
cds	chr10_gencode_GHITM_ENSG00000165678.15	0.610824167299065
cds	chr10_gencode_GJD4_ENSG00000177291.3	0.975523197273991
cds	chr10_gencode_GLRX3_ENSG00000108010.7	0.563255815033768
cds	chr10_gencode_GLUD1_ENSG00000148672.7	0.810537362582583
cds	chr10_gencode_GOLGA7B_ENSG00000155265.6	0.999999999999979
cds	chr10_gencode_GOLGA7B_ENSG00000269783.1	0.0514369430297923
cds	chr10_gencode_GOT1_ENSG00000120053.9	0.239500576519589
cds	chr10_gencode_GPAM_ENSG00000119927.9	0.930243568332295
cds	chr10_gencode_GPR123_ENSG00000197177.11	0.998501026127917
cds	chr10_gencode_GPR158_ENSG00000151025.9	0.00227588828880671
cds	chr10_gencode_GPR26_ENSG00000154478.3	0.747244034879342
cds	chr10_gencode_GPRIN2_ENSG00000204175.4	0.0621402555640726
cds	chr10_gencode_GRID1_ENSG00000182771.13	0.918912308425434
cds	chr10_gencode_GRK5_ENSG00000198873.10	0.528633451881034
cds	chr10_gencode_GSTO1_ENSG00000148834.8	0.725209958762259
cds	chr10_gencode_GSTO2_ENSG00000065621.10	0.613221641184116
cds	chr10_gencode_GTPBP4_ENSG00000107937.14	0.998302298285662
cds	chr10_gencode_H2AFY2_ENSG00000099284.9	0.825788631888826
cds	chr10_gencode_HABP2_ENSG00000148702.10	0.956557363058084
cds	chr10_gencode_HECTD2_ENSG00000165338.12	0.854132124624519
cds	chr10_gencode_HELLS_ENSG00000119969.10	0.899879279171396
cds	chr10_gencode_HERC4_ENSG00000148634.11	0.906303701782327
cds	chr10_gencode_HHEX_ENSG00000152804.6	0.872525221028069
cds	chr10_gencode_HIF1AN_ENSG00000166135.9	0.359254287751571
cds	chr10_gencode_HK1_ENSG00000156515.17	0.290573273138835
cds	chr10_gencode_HKDC1_ENSG00000156510.11	0.72207536897481
cds	chr10_gencode_HMX2_ENSG00000188816.3	0.880404038725022
cds	chr10_gencode_HMX3_ENSG00000188620.9	0.999873852042114
cds	chr10_gencode_HNRNPF_ENSG00000169813.12	0.902971343529159
cds	chr10_gencode_HNRNPH3_ENSG00000096746.13	0.365600500472862
cds	chr10_gencode_HOGA1_ENSG00000241935.4	0.701623306741429
cds	chr10_gencode_HPS1_ENSG00000107521.14	0.880662561866085
cds	chr10_gencode_HPS6_ENSG00000166189.6	0.781133861731428
cds	chr10_gencode_HPSE2_ENSG00000172987.8	0.894509718477663
cds	chr10_gencode_HSPA12A_ENSG00000165868.8	0.343958123954111
cds	chr10_gencode_HSPA14_ENSG00000187522.9	0.767484987977823
cds	chr10_gencode_HTR7_ENSG00000148680.11	0.281682113897865
cds	chr10_gencode_HTRA1_ENSG00000166033.7	0.389928969598629
cds	chr10_gencode_HUG1_ENSG00000269259.1	0.973709865515945
cds	chr10_gencode_IDE_ENSG00000119912.11	0.935549426055333
cds	chr10_gencode_IDI1_ENSG00000067064.6	0.755355265258732
cds	chr10_gencode_IDI2_ENSG00000148377.5	0.261022863581536
cds	chr10_gencode_IFIT1B_ENSG00000204010.3	0.399502199428805
cds	chr10_gencode_IFIT1_ENSG00000185745.8	0.25574425258505
cds	chr10_gencode_IFIT2_ENSG00000119922.7	0.373901581612422
cds	chr10_gencode_IFIT3_ENSG00000119917.9	0.964607030623541
cds	chr10_gencode_IFIT5_ENSG00000152778.7	0.257918007799782
cds	chr10_gencode_IKZF5_ENSG00000095574.7	0.520089376937568
cds	chr10_gencode_IL15RA_ENSG00000134470.15	0.966667137112868
cds	chr10_gencode_IL2RA_ENSG00000134460.11	0.435959165730684
cds	chr10_gencode_INA_ENSG00000148798.5	0.868196526994827
cds	chr10_gencode_INPP5A_ENSG00000068383.14	0.817673245353349
cds	chr10_gencode_INPP5F_ENSG00000198825.7	0.847844343932031
cds	chr10_gencode_IPMK_ENSG00000151151.5	0.380598620354499
cds	chr10_gencode_ITGA8_ENSG00000077943.7	0.974683937083755
cds	chr10_gencode_ITGB1_ENSG00000150093.14	0.733988630858158
cds	chr10_gencode_ITIH2_ENSG00000151655.13	0.360774324113363
cds	chr10_gencode_ITIH5_ENSG00000123243.10	0.789523553989298
cds	chr10_gencode_ITPRIP_ENSG00000148841.11	0.857969755745955
cds	chr10_gencode_JAKMIP3_ENSG00000188385.7	0.799577835740623
cds	chr10_gencode_JMJD1C_ENSG00000171988.13	0.97345185553649
cds	chr10_gencode_KAT6B_ENSG00000156650.8	0.995013957099547
cds	chr10_gencode_KAZALD1_ENSG00000107821.10	0.952402895942357
cds	chr10_gencode_KCNIP2_ENSG00000120049.14	0.97885260493372
cds	chr10_gencode_KCNK18_ENSG00000186795.1	0.129733870550069
cds	chr10_gencode_KCNMA1_ENSG00000156113.16	0.952463882804983
cds	chr10_gencode_KIAA1217_ENSG00000120549.11	0.575460359336835
cds	chr10_gencode_KIAA1279_ENSG00000198954.4	0.317610426980564
cds	chr10_gencode_KIAA1462_ENSG00000165757.8	0.577796652900765
cds	chr10_gencode_KIAA1598_ENSG00000187164.13	0.253016846264434
cds	chr10_gencode_KIF11_ENSG00000138160.4	0.788003348978626
cds	chr10_gencode_KIF20B_ENSG00000138182.10	0.639011035835356
cds	chr10_gencode_KIF5B_ENSG00000170759.10	0.357573301645867
cds	chr10_gencode_KIN_ENSG00000151657.7	0.975671978106851
cds	chr10_gencode_KLF6_ENSG00000067082.10	0.718217319606121
cds	chr10_gencode_KLLN_ENSG00000227268.3	0.757293502792803
cds	chr10_gencode_KNDC1_ENSG00000171798.13	0.963264138979913
cds	chr10_gencode_LARP4B_ENSG00000107929.10	0.0779759361273969
cds	chr10_gencode_LBX1_ENSG00000138136.5	0.676628824722268
cds	chr10_gencode_LCOR_ENSG00000196233.7	0.870719844659074
cds	chr10_gencode_LDB1_ENSG00000198728.6	0.706363833235818
cds	chr10_gencode_LDB3_ENSG00000122367.15	0.512243460871168
cds	chr10_gencode_LGI1_ENSG00000108231.7	0.8139484909959
cds	chr10_gencode_LHPP_ENSG00000107902.9	0.958666116183494
cds	chr10_gencode_LINC00999_ENSG00000225119.3	0.768020717382172
cds	chr10_gencode_LIPA_ENSG00000107798.13	0.929656956283131
cds	chr10_gencode_LIPF_ENSG00000182333.10	0.173216335725358
cds	chr10_gencode_LIPJ_ENSG00000204022.5	0.999999999999923
cds	chr10_gencode_LIPK_ENSG00000204021.3	0.588764000155921
cds	chr10_gencode_LIPM_ENSG00000173239.9	0.679279344430039
cds	chr10_gencode_LIPN_ENSG00000204020.5	0.178286319056068
cds	chr10_gencode_LOXL4_ENSG00000138131.3	0.8856515307311
cds	chr10_gencode_LRIT1_ENSG00000148602.5	0.843850008596412
cds	chr10_gencode_LRIT2_ENSG00000204033.5	0.951107257764984
cds	chr10_gencode_LRRC18_ENSG00000165383.6	0.0116064703577405
cds	chr10_gencode_LRRC20_ENSG00000172731.9	0.0483009316734202
cds	chr10_gencode_LRRC27_ENSG00000148814.13	0.2119835092286
cds	chr10_gencode_LRRTM3_ENSG00000198739.6	0.970360824827287
cds	chr10_gencode_LYZL1_ENSG00000120563.4	1
cds	chr10_gencode_LYZL2_ENSG00000151033.7	0.431588943235003
cds	chr10_gencode_LZTS2_ENSG00000107816.13	0.922048684846424
cds	chr10_gencode_MAP3K8_ENSG00000107968.5	0.742459515510408
cds	chr10_gencode_MAPK8_ENSG00000107643.11	0.138207646882812
cds	chr10_gencode_MARCH5_ENSG00000198060.5	0.928876571267768
cds	chr10_gencode_MARCH8_ENSG00000165406.11	0.853287331996788
cds	chr10_gencode_MARVELD1_ENSG00000155254.8	1
cds	chr10_gencode_MASTL_ENSG00000120539.10	0.999390025011005
cds	chr10_gencode_MAT1A_ENSG00000151224.8	0.22635945441402
cds	chr10_gencode_MBL2_ENSG00000165471.6	0.889428438774907
cds	chr10_gencode_MCM10_ENSG00000065328.12	0.780715582025987
cds	chr10_gencode_MCMBP_ENSG00000197771.8	0.452525822077909
cds	chr10_gencode_MCU_ENSG00000156026.10	0.036846252625139
cds	chr10_gencode_MEIG1_ENSG00000197889.5	0.175355619554778
cds	chr10_gencode_METTL10_ENSG00000203791.9	0.578016018420739
cds	chr10_gencode_MGEA5_ENSG00000198408.9	0.561563864149434
cds	chr10_gencode_MGMT_ENSG00000170430.9	0.97141836061729
cds	chr10_gencode_MICU1_ENSG00000107745.12	0.246400072297062
cds	chr10_gencode_MINPP1_ENSG00000107789.11	1
cds	chr10_gencode_MKI67_ENSG00000148773.8	0.947206238558796
cds	chr10_gencode_MKX_ENSG00000150051.9	0.952735246666836
cds	chr10_gencode_MLLT10_ENSG00000078403.12	0.869013914474576
cds	chr10_gencode_MMP21_ENSG00000154485.4	0.986113639999587
cds	chr10_gencode_MMRN2_ENSG00000173269.9	0.990928797038839
cds	chr10_gencode_MMS19_ENSG00000155229.16	0.926357517665228
cds	chr10_gencode_MORN4_ENSG00000171160.13	1
cds	chr10_gencode_MPP7_ENSG00000150054.14	0.108374844136819
cds	chr10_gencode_MRC1L1_ENSG00000183748.4	0.999998147912155
cds	chr10_gencode_MRC1_ENSG00000120586.4	0.999999885684967
cds	chr10_gencode_MRPL43_ENSG00000055950.12	0.891264219158304
cds	chr10_gencode_MRPS16_ENSG00000182180.9	0.418738638449194
cds	chr10_gencode_MSMB_ENSG00000138294.9	0.999999999999994
cds	chr10_gencode_MSRB2_ENSG00000148450.8	0.502418811176613
cds	chr10_gencode_MSS51_ENSG00000166343.5	0.776742303428409
cds	chr10_gencode_MTG1_ENSG00000148824.14	0.824899336957006
cds	chr10_gencode_MTPAP_ENSG00000107951.8	0.943519630713973
cds	chr10_gencode_MTRNR2L5_ENSG00000249860.2	1
cds	chr10_gencode_MTRNR2L7_ENSG00000256892.1	0.0588965813880413
cds	chr10_gencode_MXI1_ENSG00000119950.16	0.962208851210966
cds	chr10_gencode_MYO3A_ENSG00000095777.10	0.875437957434759
cds	chr10_gencode_MYOF_ENSG00000138119.12	0.994216089434285
cds	chr10_gencode_MYOZ1_ENSG00000177791.11	0.34120038902544
cds	chr10_gencode_MYPN_ENSG00000138347.11	0.259656187810951
cds	chr10_gencode_NAMPTL_ENSG00000229644.4	1
cds	chr10_gencode_NANOS1_ENSG00000188613.5	0.994350133052427
cds	chr10_gencode_NCOA4_ENSG00000138293.15	0.997206471362976
cds	chr10_gencode_NDST2_ENSG00000166507.12	0.728927846058208
cds	chr10_gencode_NDUFB8_ENSG00000166136.11	0.198413802817282
cds	chr10_gencode_NEBL_ENSG00000078114.14	0.228284969124724
cds	chr10_gencode_NET1_ENSG00000173848.14	0.903985827344273
cds	chr10_gencode_NEURL_ENSG00000107954.6	0.990288591840555
cds	chr10_gencode_NEUROG3_ENSG00000122859.4	0.988734558319856
cds	chr10_gencode_NFKB2_ENSG00000077150.13	0.840552783117419
cds	chr10_gencode_NHLRC2_ENSG00000196865.4	0.971316919920672
cds	chr10_gencode_NKX1-2_ENSG00000229544.6	0.999852025664773
cds	chr10_gencode_NKX2-3_ENSG00000119919.9	0.977653311459022
cds	chr10_gencode_NKX6-2_ENSG00000148826.6	0.999745216732652
cds	chr10_gencode_NMT2_ENSG00000152465.13	0.999396162054811
cds	chr10_gencode_NOC3L_ENSG00000173145.7	0.60734740424667
cds	chr10_gencode_NODAL_ENSG00000156574.5	0.360892372638637
cds	chr10_gencode_NOLC1_ENSG00000166197.12	0.1148253315
cds	chr10_gencode_NPFFR1_ENSG00000148734.7	0.924437859044019
cds	chr10_gencode_NPM3_ENSG00000107833.6	1
cds	chr10_gencode_NPS_ENSG00000214285.1	0.509478326545799
cds	chr10_gencode_NPY4R_ENSG00000204174.2	0.617872498346386
cds	chr10_gencode_NRAP_ENSG00000197893.9	0.995932525708359
cds	chr10_gencode_NRBF2_ENSG00000148572.10	0.642038764625959
cds	chr10_gencode_NRG3_ENSG00000185737.8	0.740585304672178
cds	chr10_gencode_NRP1_ENSG00000099250.13	0.632703434890536
cds	chr10_gencode_NSMCE4A_ENSG00000107672.10	0.943275977479521
cds	chr10_gencode_NSUN6_ENSG00000241058.1	0.945829573837962
cds	chr10_gencode_NT5C2_ENSG00000076685.14	0.817641610730516
cds	chr10_gencode_NUDT13_ENSG00000166321.9	0.134954033325174
cds	chr10_gencode_NUDT5_ENSG00000165609.8	1
cds	chr10_gencode_NUTM2A_ENSG00000184923.8	0.999999206176513
cds	chr10_gencode_NUTM2B_ENSG00000188199.6	0.999855559684178
cds	chr10_gencode_NUTM2D_ENSG00000214562.9	0.99999999999985
cds	chr10_gencode_NUTM2E_ENSG00000228570.3	0.999999489195443
cds	chr10_gencode_OAT_ENSG00000065154.7	0.42834388692272
cds	chr10_gencode_OBFC1_ENSG00000107960.6	0.085691473920927
cds	chr10_gencode_OGDHL_ENSG00000197444.5	0.393656585389604
cds	chr10_gencode_OIT3_ENSG00000138315.8	0.834003479008802
cds	chr10_gencode_OLAH_ENSG00000152463.10	0.144699356804953
cds	chr10_gencode_OPALIN_ENSG00000197430.6	0.619955721114441
cds	chr10_gencode_OPN4_ENSG00000122375.7	0.760291051563123
cds	chr10_gencode_OPTN_ENSG00000123240.12	0.910479318434459
cds	chr10_gencode_OR13A1_ENSG00000256574.2	0.998372616430417
cds	chr10_gencode_OTUD1_ENSG00000165312.5	0.992797493203927
cds	chr10_gencode_P4HA1_ENSG00000122884.8	0.603874994351431
cds	chr10_gencode_PALD1_ENSG00000107719.8	0.859205128036034
cds	chr10_gencode_PANK1_ENSG00000152782.12	0.996388093127061
cds	chr10_gencode_PAOX_ENSG00000148832.10	0.933586099461409
cds	chr10_gencode_PAPSS2_ENSG00000198682.8	0.869907533058153
cds	chr10_gencode_PARD3_ENSG00000148498.11	0.999732558901385
cds	chr10_gencode_PARG_ENSG00000227345.4	0.226975182062467
cds	chr10_gencode_PAX2_ENSG00000075891.17	0.977239538248397
cds	chr10_gencode_PBLD_ENSG00000108187.11	0.619373734515686
cds	chr10_gencode_PCBD1_ENSG00000166228.4	1
cds	chr10_gencode_PCDH15_ENSG00000150275.13	0.767729166101004
cds	chr10_gencode_PCGF5_ENSG00000180628.10	0.490450240033361
cds	chr10_gencode_PCGF6_ENSG00000156374.10	1
cds	chr10_gencode_PDCD11_ENSG00000148843.9	0.421256400315613
cds	chr10_gencode_PDCD4_ENSG00000150593.11	0.0695008223734724
cds	chr10_gencode_PDE6C_ENSG00000095464.9	0.823258051581183
cds	chr10_gencode_PDLIM1_ENSG00000107438.4	0.29952448410964
cds	chr10_gencode_PDSS1_ENSG00000148459.11	0.340271484352185
cds	chr10_gencode_PDZD7_ENSG00000186862.13	0.178545601644129
cds	chr10_gencode_PDZD8_ENSG00000165650.7	0.969643914773764
cds	chr10_gencode_PFKFB3_ENSG00000170525.14	0.640056682901457
cds	chr10_gencode_PFKP_ENSG00000067057.12	0.325584873801939
cds	chr10_gencode_PGAM1_ENSG00000171314.8	0.534052386537786
cds	chr10_gencode_PGBD3_ENSG00000243251.4	0.527429506334834
cds	chr10_gencode_PHYHIPL_ENSG00000165443.7	0.143069533943482
cds	chr10_gencode_PHYH_ENSG00000107537.9	0.783596421904305
cds	chr10_gencode_PI4K2A_ENSG00000155252.12	0.963758784634547
cds	chr10_gencode_PI4K2A_ENSG00000249967.1	0.819720624036938
cds	chr10_gencode_PIK3AP1_ENSG00000155629.10	0.795207757705008
cds	chr10_gencode_PIP4K2A_ENSG00000150867.9	0.938820049765801
cds	chr10_gencode_PITRM1_ENSG00000107959.11	0.0464096198668203
cds	chr10_gencode_PITX3_ENSG00000107859.5	0.89886935712922
cds	chr10_gencode_PKD2L1_ENSG00000107593.15	0.346966480307967
cds	chr10_gencode_PLA2G12B_ENSG00000138308.5	0.164902025223047
cds	chr10_gencode_PLAC9_ENSG00000189129.9	0.81226661139737
cds	chr10_gencode_PLAU_ENSG00000122861.11	0.156626061097487
cds	chr10_gencode_PLCE1_ENSG00000138193.10	0.925487092948357
cds	chr10_gencode_PLEKHA1_ENSG00000107679.10	0.0780029028312277
cds	chr10_gencode_PLEKHS1_ENSG00000148735.10	0.527702235531067
cds	chr10_gencode_PLXDC2_ENSG00000120594.12	0.0270881742879513
cds	chr10_gencode_PNLIPRP1_ENSG00000187021.10	0.891311354489382
cds	chr10_gencode_PNLIPRP2_ENSG00000165862.10	0.998476413899644
cds	chr10_gencode_PNLIPRP3_ENSG00000203837.4	0.241485352826967
cds	chr10_gencode_PNLIP_ENSG00000175535.6	0.698604972290467
cds	chr10_gencode_POLL_ENSG00000166169.12	0.860093216860738
cds	chr10_gencode_POLR3A_ENSG00000148606.8	0.331022151357132
cds	chr10_gencode_PPA1_ENSG00000180817.7	0.0197019071630634
cds	chr10_gencode_PPAPDC1A_ENSG00000203805.6	0.68831132613594
cds	chr10_gencode_PPIF_ENSG00000108179.9	0.824375829282568
cds	chr10_gencode_PPP1R3C_ENSG00000119938.8	0.293431004140985
cds	chr10_gencode_PPP2R2D_ENSG00000175470.14	0.626850651401175
cds	chr10_gencode_PPP3CB_ENSG00000107758.11	0.715808846284265
cds	chr10_gencode_PPRC1_ENSG00000148840.6	0.316681577265511
cds	chr10_gencode_PRAP1_ENSG00000165828.9	0.442684603951276
cds	chr10_gencode_PRDX3_ENSG00000165672.5	0.85838047909054
cds	chr10_gencode_PRF1_ENSG00000180644.6	0.477105525796695
cds	chr10_gencode_PRKCQ_ENSG00000065675.10	0.920181862554401
cds	chr10_gencode_PRKG1_ENSG00000185532.10	0.664659331467816
cds	chr10_gencode_PRLHR_ENSG00000119973.3	0.999497989710588
cds	chr10_gencode_PROSER2_ENSG00000148426.8	0.922696559078868
cds	chr10_gencode_PRPF18_ENSG00000165630.9	0.496398667943605
cds	chr10_gencode_PRR26_ENSG00000180525.9	0.945876423713563
cds	chr10_gencode_PRTFDC1_ENSG00000099256.14	0.999999999999887
cds	chr10_gencode_PSAP_ENSG00000197746.9	0.320395086024408
cds	chr10_gencode_PSD_ENSG00000059915.12	0.818872857138931
cds	chr10_gencode_PSTK_ENSG00000179988.9	0.899172094008992
cds	chr10_gencode_PTCHD3_ENSG00000182077.6	0.683809359408078
cds	chr10_gencode_PTEN_ENSG00000171862.5	7.69560111081969e-29
cds	chr10_gencode_PTER_ENSG00000165983.10	0.577151723439211
cds	chr10_gencode_PTF1A_ENSG00000168267.5	0.949886505278809
cds	chr10_gencode_PTPLA_ENSG00000165996.9	0.763832565526988
cds	chr10_gencode_PTPN20A_ENSG00000204179.6	1
cds	chr10_gencode_PTPN20B_ENSG00000183675.10	0.999999999999951
cds	chr10_gencode_PTPRE_ENSG00000132334.12	0.985958081910582
cds	chr10_gencode_PWWP2B_ENSG00000171813.10	0.929027544864229
cds	chr10_gencode_PYROXD2_ENSG00000119943.6	0.864583897537117
cds	chr10_gencode_R3HCC1L_ENSG00000166024.9	0.782235709546561
cds	chr10_gencode_RAB11FIP2_ENSG00000107560.6	0.793331530782565
cds	chr10_gencode_RAB18_ENSG00000099246.12	0.0489722700521074
cds	chr10_gencode_RASGEF1A_ENSG00000198915.7	0.931905328832045
cds	chr10_gencode_RASSF4_ENSG00000107551.16	0.250862598742513
cds	chr10_gencode_RBM17_ENSG00000134453.11	0.589446902849602
cds	chr10_gencode_RBM20_ENSG00000203867.7	0.904196110448133
cds	chr10_gencode_RBP3_ENSG00000107618.4	0.893256672439566
cds	chr10_gencode_RBP4_ENSG00000138207.8	0.556100563180243
cds	chr10_gencode_REEP3_ENSG00000165476.8	0.262153901536237
cds	chr10_gencode_RET_ENSG00000165731.13	0.980112653546335
cds	chr10_gencode_RGR_ENSG00000148604.9	0.949437935482357
cds	chr10_gencode_RGS10_ENSG00000148908.10	0.299944895276089
cds	chr10_gencode_RHOBTB1_ENSG00000072422.12	0.936924588074909
cds	chr10_gencode_RNLS_ENSG00000184719.7	0.0280713794820165
cds	chr10_gencode_RP11-108K14.8_ENSG00000254536.1	0.413612876248447
cds	chr10_gencode_RP11-139J15.7_ENSG00000271786.1	0.59426791415681
cds	chr10_gencode_RP11-242G20.1_ENSG00000235645.2	0.781635681818236
cds	chr10_gencode_RP11-248J23.6_ENSG00000269948.1	0.645208513107784
cds	chr10_gencode_RP11-332O19.5_ENSG00000235376.5	0.0616166804126114
cds	chr10_gencode_RP11-451M19.3_ENSG00000203876.5	0.545678424318406
cds	chr10_gencode_RPP30_ENSG00000148688.9	0.758143086409225
cds	chr10_gencode_RPP38_ENSG00000152464.10	0.398998115848269
cds	chr10_gencode_RPS24_ENSG00000138326.14	0.499020944595937
cds	chr10_gencode_RRP12_ENSG00000052749.9	0.804083521544521
cds	chr10_gencode_RSU1_ENSG00000148484.13	0.948028083094553
cds	chr10_gencode_RTKN2_ENSG00000182010.6	0.438658655472293
cds	chr10_gencode_RUFY2_ENSG00000204130.8	0.98506581762362
cds	chr10_gencode_SAMD8_ENSG00000156671.8	0.387934791986862
cds	chr10_gencode_SAR1A_ENSG00000079332.10	0.543867544126853
cds	chr10_gencode_SCD_ENSG00000099194.5	0.394456858386984
cds	chr10_gencode_SEC23IP_ENSG00000107651.8	0.414295108471478
cds	chr10_gencode_SEC24C_ENSG00000176986.10	0.77831887742743
cds	chr10_gencode_SEC31B_ENSG00000075826.12	0.894458644259118
cds	chr10_gencode_SEC61A2_ENSG00000065665.16	0.662435522639327
cds	chr10_gencode_SEMA4G_ENSG00000095539.11	0.822910774728223
cds	chr10_gencode_SEPHS1_ENSG00000086475.10	0.202229958941084
cds	chr10_gencode_SFMBT2_ENSG00000198879.7	0.339402380185914
cds	chr10_gencode_SFR1_ENSG00000156384.10	0.366845720564876
cds	chr10_gencode_SFRP5_ENSG00000120057.4	0.981959951491718
cds	chr10_gencode_SFTPA1_ENSG00000122852.10	0.0381283978339991
cds	chr10_gencode_SFTPA2_ENSG00000185303.11	0.384672068847175
cds	chr10_gencode_SFTPD_ENSG00000133661.11	0.830806145393914
cds	chr10_gencode_SFXN2_ENSG00000156398.8	0.0567788947771819
cds	chr10_gencode_SFXN3_ENSG00000107819.9	0.392244078241805
cds	chr10_gencode_SFXN4_ENSG00000183605.12	0.472591480588192
cds	chr10_gencode_SGMS1_ENSG00000198964.9	0.838694226029984
cds	chr10_gencode_SGPL1_ENSG00000166224.12	0.966624242040336
cds	chr10_gencode_SH2D4B_ENSG00000178217.9	0.999494641035161
cds	chr10_gencode_SH3PXD2A_ENSG00000107957.12	0.981149987263999
cds	chr10_gencode_SHOC2_ENSG00000108061.7	0.659155456641383
cds	chr10_gencode_SIRT1_ENSG00000096717.7	0.909839222764288
cds	chr10_gencode_SKIDA1_ENSG00000180592.12	0.994991947712755
cds	chr10_gencode_SLC16A12_ENSG00000152779.12	0.292241283718654
cds	chr10_gencode_SLC16A9_ENSG00000165449.7	0.723517743545968
cds	chr10_gencode_SLC18A2_ENSG00000165646.7	0.977824092069161
cds	chr10_gencode_SLC18A3_ENSG00000187714.5	0.815328418878988
cds	chr10_gencode_SLC25A16_ENSG00000122912.10	0.897857830564759
cds	chr10_gencode_SLC25A28_ENSG00000155287.6	0.797953283690322
cds	chr10_gencode_SLC29A3_ENSG00000198246.7	0.36913683257223
cds	chr10_gencode_SLC35G1_ENSG00000176273.10	0.741981172935993
cds	chr10_gencode_SLC39A12_ENSG00000148482.7	0.127970798366132
cds	chr10_gencode_SLIT1_ENSG00000187122.12	0.987048400062507
cds	chr10_gencode_SLK_ENSG00000065613.9	0.696172457245601
cds	chr10_gencode_SMC3_ENSG00000108055.9	0.90632283779208
cds	chr10_gencode_SMNDC1_ENSG00000119953.8	0.858209683755239
cds	chr10_gencode_SNCG_ENSG00000173267.9	0.999999999999941
cds	chr10_gencode_SORBS1_ENSG00000095637.16	0.7589445810431
cds	chr10_gencode_SORCS1_ENSG00000108018.11	0.0710625330139899
cds	chr10_gencode_SORCS3_ENSG00000156395.8	0.964016370062715
cds	chr10_gencode_SPAG6_ENSG00000077327.11	0.26265796729858
cds	chr10_gencode_SPOCK2_ENSG00000107742.8	0.640247688710196
cds	chr10_gencode_SPRN_ENSG00000203772.6	0.999999999999915
cds	chr10_gencode_SRGN_ENSG00000122862.4	1
cds	chr10_gencode_ST8SIA6_ENSG00000148488.11	0.670155320095247
cds	chr10_gencode_STAMBPL1_ENSG00000138134.7	0.691343909243668
cds	chr10_gencode_STAM_ENSG00000136738.10	0.909876958427808
cds	chr10_gencode_STK32C_ENSG00000165752.12	0.998741960285509
cds	chr10_gencode_STOX1_ENSG00000165730.10	0.138433830377388
cds	chr10_gencode_SUFU_ENSG00000107882.7	0.94212227655548
cds	chr10_gencode_SUPV3L1_ENSG00000156502.9	0.564549915949755
cds	chr10_gencode_SUV39H2_ENSG00000152455.11	0.221335053295301
cds	chr10_gencode_SVIL_ENSG00000197321.10	0.901770238037331
cds	chr10_gencode_SYCE1_ENSG00000171772.11	0.728204654256204
cds	chr10_gencode_SYNPO2L_ENSG00000166317.7	0.747045865649431
cds	chr10_gencode_SYT15_ENSG00000204176.9	0.878622161594012
cds	chr10_gencode_TACC2_ENSG00000138162.13	0.685389554286712
cds	chr10_gencode_TACR2_ENSG00000075073.10	0.825988571080454
cds	chr10_gencode_TAF3_ENSG00000165632.7	0.540791383252059
cds	chr10_gencode_TAF5_ENSG00000148835.9	0.00914180627543326
cds	chr10_gencode_TBATA_ENSG00000166220.8	0.061076975843608
cds	chr10_gencode_TBC1D12_ENSG00000108239.8	0.999342819678071
cds	chr10_gencode_TCERG1L_ENSG00000176769.9	0.843124118462546
cds	chr10_gencode_TCF7L2_ENSG00000148737.11	0.127451671473411
cds	chr10_gencode_TCTN3_ENSG00000119977.16	0.799719205937684
cds	chr10_gencode_TDRD1_ENSG00000095627.5	0.673090133829147
cds	chr10_gencode_TECTB_ENSG00000119913.4	0.955534444035438
cds	chr10_gencode_TET1_ENSG00000138336.8	0.555879279997692
cds	chr10_gencode_TEX36_ENSG00000175018.8	0.999999999999966
cds	chr10_gencode_TFAM_ENSG00000108064.6	0.749459789914899
cds	chr10_gencode_THNSL1_ENSG00000185875.8	0.919248555271749
cds	chr10_gencode_TIAL1_ENSG00000151923.13	0.280742616434671
cds	chr10_gencode_TIMM23B_ENSG00000204152.6	0.999999999999956
cds	chr10_gencode_TIMM23_ENSG00000138297.9	0.953569205143741
cds	chr10_gencode_TLL2_ENSG00000095587.8	0.998448137758779
cds	chr10_gencode_TLX1NB_ENSG00000236311.2	0.676877252464108
cds	chr10_gencode_TLX1_ENSG00000107807.8	0.969499273493568
cds	chr10_gencode_TM9SF3_ENSG00000077147.10	0.995817080710299
cds	chr10_gencode_TMEM180_ENSG00000138111.10	0.963059085134866
cds	chr10_gencode_TMEM236_ENSG00000148483.7	1
cds	chr10_gencode_TMEM236_ENSG00000184040.7	0.958074521326192
cds	chr10_gencode_TMEM254_ENSG00000133678.9	1
cds	chr10_gencode_TMEM26_ENSG00000196932.7	0.308811033548877
cds	chr10_gencode_TMEM72_ENSG00000187783.7	0.743111773546928
cds	chr10_gencode_TNKS2_ENSG00000107854.5	0.975490622599765
cds	chr10_gencode_TRDMT1_ENSG00000107614.17	0.725566337415712
cds	chr10_gencode_TRIM8_ENSG00000171206.9	0.697694073994995
cds	chr10_gencode_TRUB1_ENSG00000165832.4	0.649112877200176
cds	chr10_gencode_TSPAN14_ENSG00000108219.10	0.301224955661189
cds	chr10_gencode_TSPAN15_ENSG00000099282.5	0.67567747706739
cds	chr10_gencode_TTC18_ENSG00000156042.13	0.690914765584611
cds	chr10_gencode_TTC40_ENSG00000171811.8	0.999999998086012
cds	chr10_gencode_TUBAL3_ENSG00000178462.7	0.705927872266078
cds	chr10_gencode_TUBB8_ENSG00000173876.9	0.683127121619612
cds	chr10_gencode_TUBGCP2_ENSG00000130640.9	0.21970458123134
cds	chr10_gencode_TYSND1_ENSG00000156521.9	0.995011800557064
cds	chr10_gencode_UBE2D1_ENSG00000072401.10	0.652298636108978
cds	chr10_gencode_UBTD1_ENSG00000165886.4	0.794286121444987
cds	chr10_gencode_UCMA_ENSG00000165623.5	0.457191107090696
cds	chr10_gencode_UCN3_ENSG00000178473.5	1
cds	chr10_gencode_UNC5B_ENSG00000107731.8	0.883081421165987
cds	chr10_gencode_UPF2_ENSG00000151461.15	0.56364992396405
cds	chr10_gencode_UROS_ENSG00000188690.8	0.273400956609147
cds	chr10_gencode_USMG5_ENSG00000173915.8	0.0253577232570003
cds	chr10_gencode_USP54_ENSG00000166348.13	0.730203533575475
cds	chr10_gencode_USP6NL_ENSG00000148429.10	0.579983285695236
cds	chr10_gencode_UTF1_ENSG00000171794.3	0.992136168663473
cds	chr10_gencode_VAX1_ENSG00000148704.8	0.999468642629248
cds	chr10_gencode_VCL_ENSG00000035403.12	0.366678524623203
cds	chr10_gencode_VDAC2_ENSG00000165637.9	1
cds	chr10_gencode_VENTX_ENSG00000151650.7	0.57702748981688
cds	chr10_gencode_VIM_ENSG00000026025.9	0.85962358292522
cds	chr10_gencode_VPS26A_ENSG00000122958.10	0.863386984295735
cds	chr10_gencode_VSTM4_ENSG00000165633.8	0.0511398022617
cds	chr10_gencode_VTI1A_ENSG00000151532.9	1
cds	chr10_gencode_VWA2_ENSG00000165816.8	0.638481179703529
cds	chr10_gencode_WAC_ENSG00000095787.17	0.066751509918819
cds	chr10_gencode_WAPAL_ENSG00000062650.13	0.424814574670681
cds	chr10_gencode_WBP1L_ENSG00000166272.12	0.850671055008554
cds	chr10_gencode_WDFY4_ENSG00000128815.13	0.926312477820609
cds	chr10_gencode_WDR11_ENSG00000120008.11	0.948320803722219
cds	chr10_gencode_WDR37_ENSG00000047056.10	0.753701332800229
cds	chr10_gencode_WDR96_ENSG00000197748.8	0.983080274598695
cds	chr10_gencode_WNT8B_ENSG00000075290.7	0.322726992553037
cds	chr10_gencode_XPNPEP1_ENSG00000108039.13	0.949098439051261
cds	chr10_gencode_YME1L1_ENSG00000136758.14	0.999304937256852
cds	chr10_gencode_ZCCHC24_ENSG00000165424.6	0.417996818130948
cds	chr10_gencode_ZDHHC16_ENSG00000171307.14	0.529200797849114
cds	chr10_gencode_ZDHHC6_ENSG00000023041.7	0.0995733277235538
cds	chr10_gencode_ZEB1_ENSG00000148516.17	0.374559575942276
cds	chr10_gencode_ZFAND4_ENSG00000172671.15	0.984887716354101
cds	chr10_gencode_ZFYVE27_ENSG00000155256.13	0.861057497711795
cds	chr10_gencode_ZMIZ1_ENSG00000108175.12	0.999889058206694
cds	chr10_gencode_ZMYND11_ENSG00000015171.14	0.830107500213327
cds	chr10_gencode_ZNF22_ENSG00000165512.4	0.438622672676418
cds	chr10_gencode_ZNF239_ENSG00000196793.9	0.651428792335478
cds	chr10_gencode_ZNF248_ENSG00000198105.7	0.925752751036284
cds	chr10_gencode_ZNF25_ENSG00000175395.11	0.360625248083081
cds	chr10_gencode_ZNF32_ENSG00000169740.9	0.311977352179759
cds	chr10_gencode_ZNF33A_ENSG00000189180.11	0.544838233419866
cds	chr10_gencode_ZNF33B_ENSG00000196693.10	0.784764094054807
cds	chr10_gencode_ZNF365_ENSG00000138311.11	0.520007362940002
cds	chr10_gencode_ZNF37A_ENSG00000075407.13	0.235304460581842
cds	chr10_gencode_ZNF438_ENSG00000183621.11	0.844455238214325
cds	chr10_gencode_ZNF485_ENSG00000198298.8	0.740636035778007
cds	chr10_gencode_ZNF487_ENSG00000243660.5	0.337298473820694
cds	chr10_gencode_ZNF488_ENSG00000165388.8	0.257013011662016
cds	chr10_gencode_ZNF503_ENSG00000165655.14	0.99849083418637
cds	chr10_gencode_ZNF511_ENSG00000198546.10	0.717948928698623
cds	chr10_gencode_ZRANB1_ENSG00000019995.6	0.99231772400331
cds	chr10_gencode_ZSWIM8_ENSG00000214655.6	0.725892317121594
cds	chr10_gencode_ZWINT_ENSG00000122952.12	0.994615286472472
cds	chr11_gencode_AAMDC_ENSG00000087884.10	1
cds	chr11_gencode_AASDHPPT_ENSG00000149313.6	0.71081247395196
cds	chr11_gencode_ABCC8_ENSG00000006071.7	0.981715512400187
cds	chr11_gencode_ABCG4_ENSG00000172350.5	0.208124896361491
cds	chr11_gencode_ABTB2_ENSG00000166016.4	0.995471539217829
cds	chr11_gencode_AC103801.2_ENSG00000229387.2	0.999999999999986
cds	chr11_gencode_AC131935.1_ENSG00000268242.1	0.568188322061665
cds	chr11_gencode_AC131971.1_ENSG00000183562.2	1
cds	chr11_gencode_AC132192.1_ENSG00000268403.1	0.597530366314742
cds	chr11_gencode_AC132216.1_ENSG00000184566.2	0.0884919956574997
cds	chr11_gencode_AC136297.1_ENSG00000267950.1	0.112393635720128
cds	chr11_gencode_ACAD8_ENSG00000151498.7	0.650262535706943
cds	chr11_gencode_ACAT1_ENSG00000075239.9	0.960561693920608
cds	chr11_gencode_ACCSL_ENSG00000205126.2	0.998180412917738
cds	chr11_gencode_ACCS_ENSG00000110455.9	0.524265068750075
cds	chr11_gencode_ACER3_ENSG00000078124.7	0.229177327337078
cds	chr11_gencode_ACP2_ENSG00000134575.5	0.614129810536771
cds	chr11_gencode_ACRV1_ENSG00000134940.9	0.200124561648238
cds	chr11_gencode_ACY3_ENSG00000132744.3	0.933525245999743
cds	chr11_gencode_ADAMTS15_ENSG00000166106.2	0.991935715936703
cds	chr11_gencode_ADAMTS8_ENSG00000134917.9	0.763444215008402
cds	chr11_gencode_ADM_ENSG00000148926.5	0.634844147625862
cds	chr11_gencode_ADRBK1_ENSG00000173020.6	0.982143904138031
cds	chr11_gencode_AGBL2_ENSG00000165923.11	0.746964439472618
cds	chr11_gencode_AHNAK_ENSG00000124942.9	0.742204253955346
cds	chr11_gencode_AIP_ENSG00000110711.5	0.19111039512426
cds	chr11_gencode_AKIP1_ENSG00000166452.7	0.568252357952594
cds	chr11_gencode_AL356215.1_ENSG00000269766.1	0.999999999999986
cds	chr11_gencode_ALDH3B1_ENSG00000006534.11	0.821870275094717
cds	chr11_gencode_ALDH3B2_ENSG00000132746.10	0.21524454967627
cds	chr11_gencode_ALG8_ENSG00000159063.8	0.0369518289330012
cds	chr11_gencode_ALG9_ENSG00000086848.10	0.5855170169914
cds	chr11_gencode_ALKBH3_ENSG00000166199.8	0.624847245331931
cds	chr11_gencode_ALKBH8_ENSG00000137760.10	0.949108136062565
cds	chr11_gencode_ALX4_ENSG00000052850.5	0.986769282747664
cds	chr11_gencode_AMBRA1_ENSG00000110497.10	0.548522678737757
cds	chr11_gencode_AMICA1_ENSG00000160593.13	0.153304335855444
cds	chr11_gencode_AMOTL1_ENSG00000166025.13	0.649353395994345
cds	chr11_gencode_AMPD3_ENSG00000133805.11	0.345256517761049
cds	chr11_gencode_ANAPC15_ENSG00000110200.4	0.227195968974887
cds	chr11_gencode_ANGPTL5_ENSG00000187151.3	0.670848582809336
cds	chr11_gencode_ANKK1_ENSG00000170209.4	0.89988379194657
cds	chr11_gencode_ANKRD13D_ENSG00000172932.10	0.946013636181807
cds	chr11_gencode_ANKRD42_ENSG00000137494.9	0.26365606460697
cds	chr11_gencode_ANKRD49_ENSG00000168876.4	0.692319014204188
cds	chr11_gencode_ANO1_ENSG00000131620.13	0.980909183502666
cds	chr11_gencode_ANO3_ENSG00000134343.8	0.998095990471378
cds	chr11_gencode_ANO5_ENSG00000171714.10	0.555510384043675
cds	chr11_gencode_ANO9_ENSG00000185101.8	0.970413533624602
cds	chr11_gencode_AP000679.2_ENSG00000176984.2	0.201935764008728
cds	chr11_gencode_AP000708.1_ENSG00000255537.1	0.987898406328778
cds	chr11_gencode_AP000721.4_ENSG00000256100.1	0.305331198889655
cds	chr11_gencode_AP000758.1_ENSG00000269601.1	0.999999999999962
cds	chr11_gencode_AP000769.1_ENSG00000173727.7	0.709761042493901
cds	chr11_gencode_AP000783.1_ENSG00000254667.1	0.999999999999961
cds	chr11_gencode_AP000867.1_ENSG00000187811.3	0.686141512961843
cds	chr11_gencode_AP000889.3_ENSG00000268467.1	0.999999999999969
cds	chr11_gencode_AP000974.1_ENSG00000215504.2	0.71574302726071
cds	chr11_gencode_AP001024.1_ENSG00000214305.3	0.999999999999957
cds	chr11_gencode_AP001024.2_ENSG00000214306.3	1
cds	chr11_gencode_AP001350.1_ENSG00000269570.1	1
cds	chr11_gencode_AP001362.1_ENSG00000269018.1	0.360814030953827
cds	chr11_gencode_AP001652.1_ENSG00000224130.1	0.89418462809006
cds	chr11_gencode_AP001885.1_ENSG00000179038.7	0.344061470145882
cds	chr11_gencode_AP001888.1_ENSG00000268351.1	0.516525037437413
cds	chr11_gencode_AP001925.1_ENSG00000269042.1	1
cds	chr11_gencode_AP002348.1_ENSG00000204306.2	1
cds	chr11_gencode_AP002353.1_ENSG00000268602.1	0.999999999999999
cds	chr11_gencode_AP002884.2_ENSG00000268472.1	1
cds	chr11_gencode_AP002884.3_ENSG00000272790.1	0.194644665362105
cds	chr11_gencode_AP002956.1_ENSG00000268192.1	0.999999999999991
cds	chr11_gencode_AP003041.2_ENSG00000267981.1	0.682298144754389
cds	chr11_gencode_AP003062.1_ENSG00000268936.1	0.866759475743997
cds	chr11_gencode_AP003068.23_ENSG00000254614.1	0.804976370820674
cds	chr11_gencode_AP003068.6_ENSG00000187066.4	0.999999999999991
cds	chr11_gencode_AP003733.1_ENSG00000269089.1	0.840573643305278
cds	chr11_gencode_AP003774.4_ENSG00000181908.4	0.522484257020462
cds	chr11_gencode_AP006621.5_ENSG00000255284.1	1
cds	chr11_gencode_AP2A2_ENSG00000183020.9	0.922987352082856
cds	chr11_gencode_AP5B1_ENSG00000254470.2	0.945859044357738
cds	chr11_gencode_APBB1_ENSG00000166313.14	0.733755697554857
cds	chr11_gencode_API5_ENSG00000166181.8	0.912039412329063
cds	chr11_gencode_APIP_ENSG00000149089.8	1
cds	chr11_gencode_APLNR_ENSG00000134817.9	0.00305748346632764
cds	chr11_gencode_APLP2_ENSG00000084234.12	0.659975102103954
cds	chr11_gencode_APOA1_ENSG00000118137.5	0.908157488684606
cds	chr11_gencode_APOA4_ENSG00000110244.5	0.987030493399862
cds	chr11_gencode_APOA5_ENSG00000110243.7	0.907217840166655
cds	chr11_gencode_APOC3_ENSG00000110245.7	0.32459276216096
cds	chr11_gencode_AQP11_ENSG00000178301.3	0.942843215662948
cds	chr11_gencode_ARAP1_ENSG00000186635.10	0.909792739317425
cds	chr11_gencode_ARCN1_ENSG00000095139.9	0.18116380159522
cds	chr11_gencode_ARFGAP2_ENSG00000149182.10	0.730328759886381
cds	chr11_gencode_ARFIP2_ENSG00000132254.8	0.619231217291584
cds	chr11_gencode_ARHGAP1_ENSG00000175220.7	0.724105144433329
cds	chr11_gencode_ARHGAP20_ENSG00000137727.8	0.115418376809669
cds	chr11_gencode_ARHGAP32_ENSG00000134909.14	0.951259372260877
cds	chr11_gencode_ARHGAP42_ENSG00000165895.13	0.980075320712819
cds	chr11_gencode_ARHGEF12_ENSG00000196914.4	0.868818259695941
cds	chr11_gencode_ARHGEF17_ENSG00000110237.3	0.980564180529481
cds	chr11_gencode_ARL14EP_ENSG00000152219.4	0.618267637020164
cds	chr11_gencode_ARL2_ENSG00000213465.3	0.120135954913985
cds	chr11_gencode_ARNTL_ENSG00000133794.13	0.53093673273655
cds	chr11_gencode_ARRB1_ENSG00000137486.12	0.779089141544268
cds	chr11_gencode_ART1_ENSG00000129744.2	0.459124875208755
cds	chr11_gencode_ART5_ENSG00000167311.9	0.699811765725178
cds	chr11_gencode_ASCL2_ENSG00000183734.4	0.999999999999979
cds	chr11_gencode_ASCL3_ENSG00000176009.2	0.731790519705383
cds	chr11_gencode_ASRGL1_ENSG00000162174.8	0.394268758177941
cds	chr11_gencode_ATG13_ENSG00000175224.12	0.799665296516528
cds	chr11_gencode_ATG16L2_ENSG00000168010.6	0.708286787039778
cds	chr11_gencode_ATG2A_ENSG00000110046.8	0.749803451571404
cds	chr11_gencode_ATHL1_ENSG00000142102.11	0.652342266474621
cds	chr11_gencode_ATL3_ENSG00000184743.8	0.850091150438532
cds	chr11_gencode_ATM_ENSG00000149311.13	0.171361423579601
cds	chr11_gencode_ATP5L_ENSG00000167283.3	0.417918658921782
cds	chr11_gencode_B3GAT1_ENSG00000109956.8	0.210301906672035
cds	chr11_gencode_B3GAT3_ENSG00000149541.5	0.802078158618333
cds	chr11_gencode_B3GNT1_ENSG00000174684.6	0.965213590423339
cds	chr11_gencode_B3GNT6_ENSG00000198488.6	0.998495104597345
cds	chr11_gencode_B4GALNT4_ENSG00000182272.7	0.934785796367235
cds	chr11_gencode_BACE1_ENSG00000186318.12	0.314428643674928
cds	chr11_gencode_BAD_ENSG00000002330.9	0.00520505097687358
cds	chr11_gencode_BANF1_ENSG00000175334.3	0.497569378024737
cds	chr11_gencode_BARX2_ENSG00000043039.5	0.0234978486029662
cds	chr11_gencode_BATF2_ENSG00000168062.5	0.798512382138066
cds	chr11_gencode_BBOX1_ENSG00000129151.4	0.508817912083616
cds	chr11_gencode_BBS1_ENSG00000174483.15	0.298124322405255
cds	chr11_gencode_BCL9L_ENSG00000186174.8	0.252269246821469
cds	chr11_gencode_BCO2_ENSG00000197580.7	0.245521987270068
cds	chr11_gencode_BDNF_ENSG00000176697.14	0.555781765431351
cds	chr11_gencode_BEST1_ENSG00000167995.11	0.198891059635369
cds	chr11_gencode_BET1L_ENSG00000177951.13	0.984001599650616
cds	chr11_gencode_BIRC2_ENSG00000110330.4	0.591578529735104
cds	chr11_gencode_BIRC3_ENSG00000023445.9	0.736921560185828
cds	chr11_gencode_BLID_ENSG00000259571.1	0.369045478293305
cds	chr11_gencode_BRMS1_ENSG00000174744.9	0.517467499142028
cds	chr11_gencode_BRSK2_ENSG00000174672.11	0.993188045030431
cds	chr11_gencode_BSCL2_ENSG00000168000.10	0.900239674749444
cds	chr11_gencode_BSX_ENSG00000188909.4	0.798011653523894
cds	chr11_gencode_BTBD10_ENSG00000148925.6	0.856571124591447
cds	chr11_gencode_BTBD18_ENSG00000233436.3	0.841499432646494
cds	chr11_gencode_BTG4_ENSG00000137707.9	0.837000350260784
cds	chr11_gencode_BUD13_ENSG00000137656.7	0.964662567197598
cds	chr11_gencode_C11orf16_ENSG00000176029.9	0.225702321428969
cds	chr11_gencode_C11orf1_ENSG00000137720.3	1
cds	chr11_gencode_C11orf21_ENSG00000110665.7	0.507065323850254
cds	chr11_gencode_C11orf24_ENSG00000171067.6	0.862775104710987
cds	chr11_gencode_C11orf30_ENSG00000158636.12	0.98859447695387
cds	chr11_gencode_C11orf31_ENSG00000211450.5	0.668772998398195
cds	chr11_gencode_C11orf34_ENSG00000188771.3	0.999999999999917
cds	chr11_gencode_C11orf35_ENSG00000185522.4	0.661113496766325
cds	chr11_gencode_C11orf40_ENSG00000171987.1	0.791325207091943
cds	chr11_gencode_C11orf42_ENSG00000180878.2	0.830246503652472
cds	chr11_gencode_C11orf44_ENSG00000175728.2	0.793910474453452
cds	chr11_gencode_C11orf45_ENSG00000174370.5	0.999999999999992
cds	chr11_gencode_C11orf48_ENSG00000162194.8	0.171696937332717
cds	chr11_gencode_C11orf49_ENSG00000149179.9	0.706566905542774
cds	chr11_gencode_C11orf52_ENSG00000149300.5	0.999999999999944
cds	chr11_gencode_C11orf53_ENSG00000150750.6	0.868717567236448
cds	chr11_gencode_C11orf54_ENSG00000182919.10	0.840782941329493
cds	chr11_gencode_C11orf57_ENSG00000150776.13	0.999999999999902
cds	chr11_gencode_C11orf58_ENSG00000110696.5	0.589529148965877
cds	chr11_gencode_C11orf63_ENSG00000109944.6	0.172054869642224
cds	chr11_gencode_C11orf65_ENSG00000166323.8	0.497523814275898
cds	chr11_gencode_C11orf68_ENSG00000175573.6	0.928685197685775
cds	chr11_gencode_C11orf70_ENSG00000137691.8	0.9214950964005
cds	chr11_gencode_C11orf71_ENSG00000180425.7	0.765889745678235
cds	chr11_gencode_C11orf72_ENSG00000184224.3	0.80064521802002
cds	chr11_gencode_C11orf73_ENSG00000149196.11	0.20879573000898
cds	chr11_gencode_C11orf74_ENSG00000166352.11	0.375395694530738
cds	chr11_gencode_C11orf80_ENSG00000173715.11	0.396861197205358
cds	chr11_gencode_C11orf82_ENSG00000165490.8	0.896013696701545
cds	chr11_gencode_C11orf83_ENSG00000204922.4	1
cds	chr11_gencode_C11orf84_ENSG00000168005.4	0.38338290582078
cds	chr11_gencode_C11orf85_ENSG00000168070.7	0.35440280595548
cds	chr11_gencode_C11orf86_ENSG00000173237.4	0.413675271333316
cds	chr11_gencode_C11orf87_ENSG00000185742.6	0.894745946119211
cds	chr11_gencode_C11orf88_ENSG00000183644.9	0.999999999999977
cds	chr11_gencode_C11orf89_ENSG00000184682.5	0.81144047282971
cds	chr11_gencode_C11orf91_ENSG00000205177.5	0.993621570082328
cds	chr11_gencode_C11orf94_ENSG00000234776.1	0.580582644980013
cds	chr11_gencode_C11orf96_ENSG00000187479.4	0.999889314958315
cds	chr11_gencode_C1QTNF4_ENSG00000172247.3	0.982429585263954
cds	chr11_gencode_C1QTNF5_ENSG00000223953.3	0.354410801189755
cds	chr11_gencode_C2CD2L_ENSG00000172375.8	0.860865386404216
cds	chr11_gencode_C2CD3_ENSG00000168014.12	0.994494042629056
cds	chr11_gencode_CABP2_ENSG00000167791.7	0.859700542952045
cds	chr11_gencode_CABP4_ENSG00000175544.9	0.174710804411472
cds	chr11_gencode_CADM1_ENSG00000182985.12	0.942453326632416
cds	chr11_gencode_CALCA_ENSG00000110680.8	0.616644852996809
cds	chr11_gencode_CALCB_ENSG00000175868.9	0.999999999999979
cds	chr11_gencode_CAPN1_ENSG00000014216.11	0.637042317259318
cds	chr11_gencode_CAPN5_ENSG00000149260.10	0.761823944978499
cds	chr11_gencode_CAPRIN1_ENSG00000135387.15	0.0962060160698199
cds	chr11_gencode_CARD16_ENSG00000204397.3	0.229372938666305
cds	chr11_gencode_CARD17_ENSG00000255221.2	0.133793891608378
cds	chr11_gencode_CARD18_ENSG00000255501.1	0.0907869746536041
cds	chr11_gencode_CARNS1_ENSG00000172508.6	0.797920751209101
cds	chr11_gencode_CARS_ENSG00000110619.12	0.442020485050493
cds	chr11_gencode_CASP12_ENSG00000204403.5	0.512620865475279
cds	chr11_gencode_CASP1_ENSG00000137752.18	0.887783819992852
cds	chr11_gencode_CASP4_ENSG00000196954.8	0.99484586506309
cds	chr11_gencode_CASP5_ENSG00000137757.6	0.319674895234498
cds	chr11_gencode_CATSPER1_ENSG00000175294.5	0.0991425014875895
cds	chr11_gencode_CAT_ENSG00000121691.4	0.751176688504653
cds	chr11_gencode_CBL_ENSG00000110395.4	0.318876572618474
cds	chr11_gencode_CCDC153_ENSG00000248712.3	0.598662625671576
cds	chr11_gencode_CCDC15_ENSG00000149548.10	0.993637035254752
cds	chr11_gencode_CCDC179_ENSG00000255359.2	0.609159768338461
cds	chr11_gencode_CCDC34_ENSG00000109881.12	0.755542329057783
cds	chr11_gencode_CCDC67_ENSG00000165325.9	0.91015436193787
cds	chr11_gencode_CCDC73_ENSG00000186714.8	0.0261237440538925
cds	chr11_gencode_CCDC81_ENSG00000149201.5	0.356140225524383
cds	chr11_gencode_CCDC82_ENSG00000149231.7	0.402793096919061
cds	chr11_gencode_CCDC83_ENSG00000150676.8	0.441879250263196
cds	chr11_gencode_CCDC84_ENSG00000186166.4	0.542598147593644
cds	chr11_gencode_CCDC85B_ENSG00000175602.2	0.584853035484756
cds	chr11_gencode_CCDC86_ENSG00000110104.7	0.982444111849218
cds	chr11_gencode_CCDC87_ENSG00000182791.3	0.171788815936108
cds	chr11_gencode_CCDC88B_ENSG00000168071.17	0.999725540501982
cds	chr11_gencode_CCDC89_ENSG00000179071.3	0.781544516417892
cds	chr11_gencode_CCDC90B_ENSG00000137500.5	0.912971340415053
cds	chr11_gencode_CCKBR_ENSG00000110148.5	0.847438545135399
cds	chr11_gencode_CCND1_ENSG00000110092.3	0.177991816142568
cds	chr11_gencode_CCS_ENSG00000173992.4	0.761500391364465
cds	chr11_gencode_CD151_ENSG00000177697.13	0.469744645485641
cds	chr11_gencode_CD248_ENSG00000174807.3	0.480963019772708
cds	chr11_gencode_CD3D_ENSG00000167286.5	0.129904051434939
cds	chr11_gencode_CD3E_ENSG00000198851.5	0.144999054391949
cds	chr11_gencode_CD3G_ENSG00000160654.5	0.723181750994552
cds	chr11_gencode_CD44_ENSG00000026508.12	0.316933408892931
cds	chr11_gencode_CD59_ENSG00000085063.10	0.610212524468728
cds	chr11_gencode_CD5_ENSG00000110448.6	0.838865209318891
cds	chr11_gencode_CD6_ENSG00000013725.10	0.682319704003799
cds	chr11_gencode_CD81_ENSG00000110651.7	1
cds	chr11_gencode_CD82_ENSG00000085117.7	0.874739030641486
cds	chr11_gencode_CDC42BPG_ENSG00000171219.8	0.932829310518515
cds	chr11_gencode_CDC42EP2_ENSG00000149798.3	0.999999999999933
cds	chr11_gencode_CDCA5_ENSG00000146670.5	0.274821459244608
cds	chr11_gencode_CDHR5_ENSG00000099834.14	0.995538457622085
cds	chr11_gencode_CDK2AP2_ENSG00000167797.3	0.71695133263661
cds	chr11_gencode_CDKN1C_ENSG00000129757.8	0.995628514038539
cds	chr11_gencode_CDON_ENSG00000064309.10	0.89608600128868
cds	chr11_gencode_CELF1_ENSG00000149187.13	0.872991306239655
cds	chr11_gencode_CEND1_ENSG00000184524.5	1
cds	chr11_gencode_CEP164_ENSG00000110274.10	0.606824028524675
cds	chr11_gencode_CEP57_ENSG00000166037.6	0.414283105024346
cds	chr11_gencode_CFL1_ENSG00000172757.8	0.206056641401037
cds	chr11_gencode_CHEK1_ENSG00000149554.8	0.97949881082994
cds	chr11_gencode_CHID1_ENSG00000177830.13	0.748041922590314
cds	chr11_gencode_CHKA_ENSG00000110721.7	0.155260526653695
cds	chr11_gencode_CHORDC1_ENSG00000110172.7	0.808872292323395
cds	chr11_gencode_CHRDL2_ENSG00000054938.11	0.679080121580371
cds	chr11_gencode_CHRM1_ENSG00000168539.3	0.92076959553334
cds	chr11_gencode_CHRM4_ENSG00000180720.6	0.829893881441121
cds	chr11_gencode_CHRNA10_ENSG00000129749.3	0.848640726918473
cds	chr11_gencode_CHST1_ENSG00000175264.3	0.271534696523895
cds	chr11_gencode_CKAP5_ENSG00000175216.10	0.351921859650543
cds	chr11_gencode_CLCF1_ENSG00000175505.9	1
cds	chr11_gencode_CLDN25_ENSG00000228607.2	0.347278585964958
cds	chr11_gencode_CLMP_ENSG00000166250.7	0.203892053207541
cds	chr11_gencode_CLNS1A_ENSG00000074201.4	0.906745242719174
cds	chr11_gencode_CLP1_ENSG00000172409.5	0.721363291416037
cds	chr11_gencode_CLPB_ENSG00000162129.8	0.950043606120141
cds	chr11_gencode_CNGA4_ENSG00000132259.8	0.98707437234218
cds	chr11_gencode_CNIH2_ENSG00000174871.6	0.324977037769404
cds	chr11_gencode_CNTF_ENSG00000242689.1	0.653872782060653
cds	chr11_gencode_CNTN5_ENSG00000149972.6	0.0494335721797263
cds	chr11_gencode_COA4_ENSG00000181924.6	1
cds	chr11_gencode_COLCA1_ENSG00000196167.5	0.99999999999999
cds	chr11_gencode_COLCA2_ENSG00000214290.3	0.752112626709964
cds	chr11_gencode_COMMD9_ENSG00000110442.7	0.315836726156227
cds	chr11_gencode_COPB1_ENSG00000129083.8	0.052539565276852
cds	chr11_gencode_CORO1B_ENSG00000172725.9	0.881570352419104
cds	chr11_gencode_COX8A_ENSG00000176340.3	0.181232867037476
cds	chr11_gencode_CPSF7_ENSG00000149532.11	0.806132485285879
cds	chr11_gencode_CPT1A_ENSG00000110090.8	0.329852800551506
cds	chr11_gencode_CREB3L1_ENSG00000157613.6	0.721451066023852
cds	chr11_gencode_CREBZF_ENSG00000137504.9	0.999203515339804
cds	chr11_gencode_CRTAM_ENSG00000109943.4	0.712618466864047
cds	chr11_gencode_CRY2_ENSG00000121671.7	0.56561824164687
cds	chr11_gencode_CRYAB_ENSG00000109846.3	0.74222529209231
cds	chr11_gencode_CSNK2A3_ENSG00000254598.2	0.868246147298438
cds	chr11_gencode_CSRP3_ENSG00000129170.4	0.933888168054217
cds	chr11_gencode_CST6_ENSG00000175315.2	0.524747574257348
cds	chr11_gencode_CSTF3_ENSG00000176102.7	0.583938881096853
cds	chr11_gencode_CTD-2210P24.4_ENSG00000205106.2	0.829279182389677
cds	chr11_gencode_CTD-3074O7.11_ENSG00000256349.1	0.439148003019297
cds	chr11_gencode_CTNND1_ENSG00000198561.8	0.301769018899399
cds	chr11_gencode_CTR9_ENSG00000198730.3	0.849207692914528
cds	chr11_gencode_CTSC_ENSG00000109861.11	0.936679563995219
cds	chr11_gencode_CTSD_ENSG00000117984.8	0.110716840763452
cds	chr11_gencode_CTSF_ENSG00000174080.6	0.768656554983891
cds	chr11_gencode_CTSW_ENSG00000172543.3	0.950475635577918
cds	chr11_gencode_CTTN_ENSG00000085733.11	0.594065926072753
cds	chr11_gencode_CUL5_ENSG00000166266.9	0.833175637853675
cds	chr11_gencode_CWC15_ENSG00000150316.7	0.830707739627943
cds	chr11_gencode_CWF19L2_ENSG00000152404.11	0.214086151621499
cds	chr11_gencode_CXCR5_ENSG00000160683.4	0.269829564100244
cds	chr11_gencode_CYB561A3_ENSG00000162144.5	1
cds	chr11_gencode_CYB5R2_ENSG00000166394.10	0.812805576919984
cds	chr11_gencode_CYP2R1_ENSG00000186104.6	0.982059798150317
cds	chr11_gencode_DAGLA_ENSG00000134780.5	0.607951342494957
cds	chr11_gencode_DAK_ENSG00000149476.10	0.0313158454645426
cds	chr11_gencode_DBX1_ENSG00000109851.5	0.962881221500546
cds	chr11_gencode_DCDC1_ENSG00000170959.10	0.962444819686617
cds	chr11_gencode_DCHS1_ENSG00000166341.6	0.993089930325878
cds	chr11_gencode_DCPS_ENSG00000110063.4	0.405189044949107
cds	chr11_gencode_DCUN1D5_ENSG00000137692.7	0.815701638614591
cds	chr11_gencode_DDB1_ENSG00000167986.9	0.0430091336501679
cds	chr11_gencode_DDB2_ENSG00000134574.7	0.864010738191616
cds	chr11_gencode_DDI1_ENSG00000170967.3	0.0134196525153343
cds	chr11_gencode_DDX10_ENSG00000178105.5	0.98786866613639
cds	chr11_gencode_DDX25_ENSG00000109832.8	0.360490423034735
cds	chr11_gencode_DDX6_ENSG00000110367.7	0.310496373470131
cds	chr11_gencode_DEAF1_ENSG00000177030.12	0.738095452128371
cds	chr11_gencode_DEFB108B_ENSG00000184276.2	1
cds	chr11_gencode_DENND5A_ENSG00000184014.3	0.450299927535949
cds	chr11_gencode_DEPDC7_ENSG00000121690.5	0.796649011350921
cds	chr11_gencode_DGAT2_ENSG00000062282.10	0.107523471819022
cds	chr11_gencode_DGKZ_ENSG00000149091.11	0.624041969012118
cds	chr11_gencode_DHCR7_ENSG00000172893.11	0.896360930755414
cds	chr11_gencode_DIXDC1_ENSG00000150764.9	0.967832034181707
cds	chr11_gencode_DKFZP434E1119_ENSG00000268635.1	0.999999999999974
cds	chr11_gencode_DKK3_ENSG00000050165.13	0.522501237264356
cds	chr11_gencode_DLAT_ENSG00000150768.11	0.750331185603365
cds	chr11_gencode_DLG2_ENSG00000150672.12	0.890708933494364
cds	chr11_gencode_DNAJB13_ENSG00000187726.4	0.727986250752861
cds	chr11_gencode_DNAJC24_ENSG00000170946.10	0.0431064481441123
cds	chr11_gencode_DNAJC4_ENSG00000110011.9	0.718201668515323
cds	chr11_gencode_DNHD1_ENSG00000179532.8	0.999920123252655
cds	chr11_gencode_DPAGT1_ENSG00000172269.12	0.871580750158402
cds	chr11_gencode_DPF2_ENSG00000133884.5	0.382687101859899
cds	chr11_gencode_DPP3_ENSG00000254986.3	0.5149247153665
cds	chr11_gencode_DRAP1_ENSG00000175550.3	0.938489903663553
cds	chr11_gencode_DRD2_ENSG00000149295.9	0.195450886435755
cds	chr11_gencode_DRD4_ENSG00000069696.6	0.999999999999912
cds	chr11_gencode_DSCAML1_ENSG00000177103.9	0.959801549074599
cds	chr11_gencode_DTX4_ENSG00000110042.3	0.495471662939632
cds	chr11_gencode_DUSP8_ENSG00000184545.6	0.985011976580834
cds	chr11_gencode_DYNC2H1_ENSG00000187240.9	0.999817267948238
cds	chr11_gencode_E2F8_ENSG00000129173.8	0.966261958086478
cds	chr11_gencode_EED_ENSG00000074266.13	0.588502351955932
cds	chr11_gencode_EEF1G_ENSG00000254772.5	0.166209589004325
cds	chr11_gencode_EFCAB4A_ENSG00000177685.12	0.979791438017457
cds	chr11_gencode_EFEMP2_ENSG00000172638.8	0.0290127631820758
cds	chr11_gencode_EHBP1L1_ENSG00000173442.7	0.999496300584696
cds	chr11_gencode_EHD1_ENSG00000110047.13	0.799519762405564
cds	chr11_gencode_EHF_ENSG00000135373.8	0.888799579529786
cds	chr11_gencode_EI24_ENSG00000149547.10	0.393117965889445
cds	chr11_gencode_EIF1AD_ENSG00000175376.4	1
cds	chr11_gencode_EIF3F_ENSG00000175390.8	0.83580591857447
cds	chr11_gencode_EIF3M_ENSG00000149100.8	0.999999999999954
cds	chr11_gencode_EIF4G2_ENSG00000110321.11	0.892725221137317
cds	chr11_gencode_ELF5_ENSG00000135374.5	0.816946251642774
cds	chr11_gencode_ELMOD1_ENSG00000110675.8	0.921940743612307
cds	chr11_gencode_ELP4_ENSG00000109911.13	0.76160813472758
cds	chr11_gencode_EML3_ENSG00000149499.7	0.858092583409755
cds	chr11_gencode_ENDOD1_ENSG00000149218.4	0.883987072617004
cds	chr11_gencode_EPS8L2_ENSG00000177106.10	0.909530233359994
cds	chr11_gencode_ESAM_ENSG00000149564.7	0.956657866638666
cds	chr11_gencode_ESRRA_ENSG00000173153.9	0.367278119570381
cds	chr11_gencode_ETS1_ENSG00000134954.10	0.330351225146062
cds	chr11_gencode_EXPH5_ENSG00000110723.7	0.631977833529162
cds	chr11_gencode_EXT2_ENSG00000151348.9	0.999461970698014
cds	chr11_gencode_F2_ENSG00000180210.10	0.862779993591486
cds	chr11_gencode_FADD_ENSG00000168040.4	0.965419300692776
cds	chr11_gencode_FADS1_ENSG00000149485.12	0.964969084866094
cds	chr11_gencode_FADS2_ENSG00000134824.9	0.582254507680875
cds	chr11_gencode_FADS3_ENSG00000221968.4	0.0662748785005858
cds	chr11_gencode_FAM111A_ENSG00000166801.11	0.797066945043862
cds	chr11_gencode_FAM111B_ENSG00000189057.6	0.845022203723994
cds	chr11_gencode_FAM118B_ENSG00000197798.4	0.99999999999997
cds	chr11_gencode_FAM160A2_ENSG00000051009.6	0.983985073871698
cds	chr11_gencode_FAM168A_ENSG00000054965.6	0.722871379524787
cds	chr11_gencode_FAM180B_ENSG00000196666.3	0.625173733500619
cds	chr11_gencode_FAM181B_ENSG00000182103.3	0.998870609203792
cds	chr11_gencode_FAM76B_ENSG00000077458.8	0.904265024651579
cds	chr11_gencode_FAM86C1_ENSG00000158483.11	0.404988370906084
cds	chr11_gencode_FAM89B_ENSG00000176973.7	0.999999999999946
cds	chr11_gencode_FANCF_ENSG00000183161.3	0.999130639481613
cds	chr11_gencode_FAR1_ENSG00000197601.8	0.383608489152094
cds	chr11_gencode_FAT3_ENSG00000165323.11	0.999999296232845
cds	chr11_gencode_FAU_ENSG00000149806.6	0.159032980908746
cds	chr11_gencode_FBXO3_ENSG00000110429.9	0.817062381448697
cds	chr11_gencode_FCHSD2_ENSG00000137478.10	0.994717725809259
cds	chr11_gencode_FDX1_ENSG00000137714.2	0.872813094503176
cds	chr11_gencode_FDXACB1_ENSG00000255561.2	0.420661319316126
cds	chr11_gencode_FEN1_ENSG00000168496.3	0.720757459184718
cds	chr11_gencode_FERMT3_ENSG00000149781.8	0.599302176632824
cds	chr11_gencode_FEZ1_ENSG00000149557.8	0.924329539786652
cds	chr11_gencode_FGF19_ENSG00000162344.3	0.913080355724226
cds	chr11_gencode_FGF3_ENSG00000186895.2	0.400412867369173
cds	chr11_gencode_FGF4_ENSG00000075388.2	0.990637709813294
cds	chr11_gencode_FIBIN_ENSG00000176971.2	0.760954531919017
cds	chr11_gencode_FIBP_ENSG00000172500.8	0.367545040826226
cds	chr11_gencode_FJX1_ENSG00000179431.5	0.998700120434235
cds	chr11_gencode_FKBP2_ENSG00000173486.8	0.334122475005091
cds	chr11_gencode_FLI1_ENSG00000151702.12	0.72194393276737
cds	chr11_gencode_FLRT1_ENSG00000126500.3	0.132781263210683
cds	chr11_gencode_FNBP4_ENSG00000109920.8	0.512333701651363
cds	chr11_gencode_FOLH1_ENSG00000086205.12	0.150192470322931
cds	chr11_gencode_FOLR1_ENSG00000110195.7	0.103349575157193
cds	chr11_gencode_FOLR2_ENSG00000165457.9	0.336472420698009
cds	chr11_gencode_FOLR3_ENSG00000110203.4	0.763161890553022
cds	chr11_gencode_FOLR4_ENSG00000183560.4	0.840226575238814
cds	chr11_gencode_FOSL1_ENSG00000175592.4	0.834967035402869
cds	chr11_gencode_FOXR1_ENSG00000176302.8	0.0958475213695885
cds	chr11_gencode_FOXRED1_ENSG00000110074.6	0.750180324725338
cds	chr11_gencode_FRMD8_ENSG00000126391.9	0.742805264432366
cds	chr11_gencode_FSHB_ENSG00000131808.6	1
cds	chr11_gencode_FTH1_ENSG00000167996.11	0.573302594483932
cds	chr11_gencode_FUT4_ENSG00000196371.2	0.999994254661031
cds	chr11_gencode_FXYD2_ENSG00000137731.9	0.999999999999967
cds	chr11_gencode_FXYD6-FXYD2_ENSG00000255245.3	0.667445785271919
cds	chr11_gencode_FXYD6_ENSG00000137726.11	0.465762342190806
cds	chr11_gencode_FZD4_ENSG00000174804.3	0.990713948645329
cds	chr11_gencode_GAB2_ENSG00000033327.8	0.42691781579904
cds	chr11_gencode_GAL3ST3_ENSG00000175229.6	0.849725891029233
cds	chr11_gencode_GALNT18_ENSG00000110328.5	0.00552391043332244
cds	chr11_gencode_GAL_ENSG00000069482.6	0.744779288078562
cds	chr11_gencode_GANAB_ENSG00000089597.12	0.814051873736746
cds	chr11_gencode_GAS2_ENSG00000148935.6	0.98458829490245
cds	chr11_gencode_GDPD4_ENSG00000178795.5	0.99557412282032
cds	chr11_gencode_GDPD5_ENSG00000158555.10	0.481347882525847
cds	chr11_gencode_GIF_ENSG00000134812.3	0.949501857796675
cds	chr11_gencode_GLB1L2_ENSG00000149328.10	0.744287923607595
cds	chr11_gencode_GLB1L3_ENSG00000166105.11	0.87723379717879
cds	chr11_gencode_GLYATL1_ENSG00000166840.9	0.401321093122425
cds	chr11_gencode_GLYATL2_ENSG00000156689.2	0.246414840118509
cds	chr11_gencode_GLYAT_ENSG00000149124.6	0.0412275868577131
cds	chr11_gencode_GNG3_ENSG00000162188.5	0.352303518979247
cds	chr11_gencode_GPHA2_ENSG00000149735.2	0.350854682876889
cds	chr11_gencode_GPR137_ENSG00000173264.9	0.294973827371644
cds	chr11_gencode_GPR152_ENSG00000175514.2	0.356942905321445
cds	chr11_gencode_GPR83_ENSG00000123901.4	0.769168961179766
cds	chr11_gencode_GRAMD1B_ENSG00000023171.10	0.712309213838749
cds	chr11_gencode_GRIA4_ENSG00000152578.8	0.97087393498521
cds	chr11_gencode_GRIK4_ENSG00000149403.7	0.997961525381214
cds	chr11_gencode_GRM5_ENSG00000168959.10	0.932935858520148
cds	chr11_gencode_GSTP1_ENSG00000084207.11	0.15056897013282
cds	chr11_gencode_GTF2H1_ENSG00000110768.7	0.449799588968525
cds	chr11_gencode_GUCY1A2_ENSG00000152402.6	0.283362292897928
cds	chr11_gencode_GYLTL1B_ENSG00000165905.12	0.778317687255272
cds	chr11_gencode_H2AFX_ENSG00000188486.3	0.534960535381624
cds	chr11_gencode_HARBI1_ENSG00000180423.4	0.0201365646257523
cds	chr11_gencode_HBB_ENSG00000244734.2	0.690473651779399
cds	chr11_gencode_HBD_ENSG00000223609.3	0.412438771931554
cds	chr11_gencode_HBE1_ENSG00000213931.1	0.734181386061718
cds	chr11_gencode_HBG1_ENSG00000213934.5	0.891955765026963
cds	chr11_gencode_HBG2_ENSG00000196565.8	0.973705593519631
cds	chr11_gencode_HEPACAM_ENSG00000165478.6	0.860487101308804
cds	chr11_gencode_HEPHL1_ENSG00000181333.11	0.476607866661249
cds	chr11_gencode_HEPN1_ENSG00000221932.5	0.449120207500125
cds	chr11_gencode_HINFP_ENSG00000172273.8	0.923024178446556
cds	chr11_gencode_HIPK3_ENSG00000110422.7	0.685293657801783
cds	chr11_gencode_HMBS_ENSG00000256269.2	0.999999999999893
cds	chr11_gencode_HNRNPUL2_ENSG00000214753.2	0.970907535313118
cds	chr11_gencode_HPS5_ENSG00000110756.13	0.359574490021384
cds	chr11_gencode_HPX_ENSG00000110169.6	0.922596511755642
cds	chr11_gencode_HRASLS2_ENSG00000133328.3	0.613611001197227
cds	chr11_gencode_HRASLS5_ENSG00000168004.5	0.345543005479339
cds	chr11_gencode_HRAS_ENSG00000174775.12	0.0181997289422252
cds	chr11_gencode_HSD17B12_ENSG00000149084.7	0.586197297861109
cds	chr11_gencode_HSPA8_ENSG00000109971.9	0.0231143186323333
cds	chr11_gencode_HSPB2_ENSG00000170276.4	0.301725287339079
cds	chr11_gencode_HTATIP2_ENSG00000109854.9	0.834115233833951
cds	chr11_gencode_HTR3A_ENSG00000166736.7	0.94556205955738
cds	chr11_gencode_HTR3B_ENSG00000149305.2	0.914857259994594
cds	chr11_gencode_HYLS1_ENSG00000198331.6	0.728172685999894
cds	chr11_gencode_HYOU1_ENSG00000149428.14	0.968707340963619
cds	chr11_gencode_IFITM10_ENSG00000244242.1	0.13878156533686
cds	chr11_gencode_IFITM1_ENSG00000185885.11	1
cds	chr11_gencode_IFITM2_ENSG00000185201.12	0.757982337861837
cds	chr11_gencode_IFITM3_ENSG00000142089.11	0.113155411365298
cds	chr11_gencode_IFITM5_ENSG00000206013.2	1
cds	chr11_gencode_IFT46_ENSG00000118096.3	0.742132193824577
cds	chr11_gencode_IGF2_ENSG00000167244.13	0.979960727512407
cds	chr11_gencode_IGHMBP2_ENSG00000132740.4	0.67485145420501
cds	chr11_gencode_IGSF22_ENSG00000179057.9	0.922716956247354
cds	chr11_gencode_IGSF9B_ENSG00000080854.10	0.983769486439524
cds	chr11_gencode_IL10RA_ENSG00000110324.5	0.90670190989338
cds	chr11_gencode_IL18BP_ENSG00000137496.13	1
cds	chr11_gencode_IL18_ENSG00000150782.7	0.999999999999976
cds	chr11_gencode_ILK_ENSG00000166333.9	0.615305991189873
cds	chr11_gencode_IMMP1L_ENSG00000148950.5	0.188917438557893
cds	chr11_gencode_INCENP_ENSG00000149503.8	0.829234051977419
cds	chr11_gencode_INPPL1_ENSG00000165458.9	0.102125682127272
cds	chr11_gencode_INS-IGF2_ENSG00000129965.9	0.999999999999897
cds	chr11_gencode_INSC_ENSG00000188487.7	0.726245293828204
cds	chr11_gencode_INS_ENSG00000254647.2	0.414936922712774
cds	chr11_gencode_INTS4_ENSG00000149262.12	0.977308563893654
cds	chr11_gencode_INTS5_ENSG00000185085.2	0.189946064111263
cds	chr11_gencode_IPO7_ENSG00000205339.5	0.492515108890435
cds	chr11_gencode_IRF7_ENSG00000185507.15	0.679853112268165
cds	chr11_gencode_JAM3_ENSG00000166086.8	0.947268060781802
cds	chr11_gencode_JRKL_ENSG00000183340.5	0.71074074825409
cds	chr11_gencode_KAT5_ENSG00000172977.8	0.174254682202303
cds	chr11_gencode_KBTBD3_ENSG00000182359.10	0.407995692117502
cds	chr11_gencode_KBTBD4_ENSG00000123444.9	0.739026164694958
cds	chr11_gencode_KBTBD4_ENSG00000231880.1	0.999999999999977
cds	chr11_gencode_KCNA4_ENSG00000182255.6	0.980651892281209
cds	chr11_gencode_KCNC1_ENSG00000129159.6	0.975544029877516
cds	chr11_gencode_KCNE3_ENSG00000175538.6	0.208776442986631
cds	chr11_gencode_KCNJ11_ENSG00000187486.5	0.885644032986417
cds	chr11_gencode_KCNJ1_ENSG00000151704.11	0.523973430360176
cds	chr11_gencode_KCNJ5_ENSG00000120457.7	0.300749741517141
cds	chr11_gencode_KCNK4_ENSG00000182450.8	0.996350881628324
cds	chr11_gencode_KCNK7_ENSG00000173338.8	0.602904329545603
cds	chr11_gencode_KCNQ1_ENSG00000053918.11	0.80874475786962
cds	chr11_gencode_KCTD14_ENSG00000151364.11	0.57830152963531
cds	chr11_gencode_KCTD21_ENSG00000188997.3	0.229128279458857
cds	chr11_gencode_KDELC2_ENSG00000178202.8	0.985436775086167
cds	chr11_gencode_KDM2A_ENSG00000173120.10	0.467886226693787
cds	chr11_gencode_KDM4D_ENSG00000186280.5	0.844472573418236
cds	chr11_gencode_KDM4E_ENSG00000235268.2	0.960099493111221
cds	chr11_gencode_KIAA1377_ENSG00000110318.9	0.536761483734008
cds	chr11_gencode_KIAA1549L_ENSG00000110427.10	0.994741170831739
cds	chr11_gencode_KIAA1731_ENSG00000166004.10	0.969119409339169
cds	chr11_gencode_KIF18A_ENSG00000121621.6	0.589767617672981
cds	chr11_gencode_KIRREL3_ENSG00000149571.6	0.52776559975801
cds	chr11_gencode_KLC2_ENSG00000174996.7	0.474107920458278
cds	chr11_gencode_KLHL35_ENSG00000149243.11	0.981783413022579
cds	chr11_gencode_KMT2A_ENSG00000118058.16	0.981796150418916
cds	chr11_gencode_KRTAP5-10_ENSG00000204572.5	0.136143806950561
cds	chr11_gencode_KRTAP5-11_ENSG00000204571.4	0.766411504448248
cds	chr11_gencode_KRTAP5-1_ENSG00000205869.2	0.285283368819115
cds	chr11_gencode_KRTAP5-2_ENSG00000205867.2	0.00555288416457197
cds	chr11_gencode_KRTAP5-3_ENSG00000196224.7	0.184841700289866
cds	chr11_gencode_KRTAP5-4_ENSG00000241598.4	0.00286760724002398
cds	chr11_gencode_KRTAP5-5_ENSG00000185940.9	0.0141706782673809
cds	chr11_gencode_KRTAP5-6_ENSG00000205864.1	0.316036090504171
cds	chr11_gencode_KRTAP5-7_ENSG00000244411.2	0.835900319461768
cds	chr11_gencode_KRTAP5-8_ENSG00000241233.1	5.36151746222011e-07
cds	chr11_gencode_KRTAP5-9_ENSG00000254997.2	0.969882018815127
cds	chr11_gencode_LAMTOR1_ENSG00000149357.5	0.584387110020537
cds	chr11_gencode_LAYN_ENSG00000204381.7	0.203351984922763
cds	chr11_gencode_LDHAL6A_ENSG00000166800.5	0.233216623676907
cds	chr11_gencode_LDHA_ENSG00000134333.9	0.369865618997628
cds	chr11_gencode_LDHC_ENSG00000166796.7	0.281557624386976
cds	chr11_gencode_LDLRAD3_ENSG00000179241.8	0.901626495897154
cds	chr11_gencode_LGALS12_ENSG00000133317.10	0.775615682873223
cds	chr11_gencode_LGR4_ENSG00000205213.9	0.644027332686909
cds	chr11_gencode_LIN7C_ENSG00000148943.7	1
cds	chr11_gencode_LIPT2_ENSG00000175536.6	0.945117909350708
cds	chr11_gencode_LMO1_ENSG00000166407.9	0.591246915223297
cds	chr11_gencode_LMO2_ENSG00000135363.7	0.707347603742577
cds	chr11_gencode_LPXN_ENSG00000110031.8	0.732534441102065
cds	chr11_gencode_LRFN4_ENSG00000173621.8	0.712758428975267
cds	chr11_gencode_LRP4_ENSG00000134569.5	0.916307411602579
cds	chr11_gencode_LRP5_ENSG00000162337.7	0.851106606335594
cds	chr11_gencode_LRRC10B_ENSG00000204950.2	0.998813891125391
cds	chr11_gencode_LRRC32_ENSG00000137507.7	0.0461581987199801
cds	chr11_gencode_LRRC4C_ENSG00000148948.3	0.159942918302773
cds	chr11_gencode_LRRC55_ENSG00000183908.5	0.109026513460807
cds	chr11_gencode_LRRC56_ENSG00000161328.10	0.8431054464108
cds	chr11_gencode_LRRN4CL_ENSG00000177363.4	0.676410590987646
cds	chr11_gencode_LRTOMT_ENSG00000184154.8	0.126961395939288
cds	chr11_gencode_LSP1_ENSG00000130592.9	0.541148822257846
cds	chr11_gencode_LTBP3_ENSG00000168056.10	0.993930372726255
cds	chr11_gencode_LUZP2_ENSG00000187398.7	0.712580323861991
cds	chr11_gencode_LYVE1_ENSG00000133800.4	0.968996132604471
cds	chr11_gencode_MACROD1_ENSG00000133315.6	0.90043922409377
cds	chr11_gencode_MADD_ENSG00000110514.14	0.75599175578041
cds	chr11_gencode_MAML2_ENSG00000184384.9	0.503607659565717
cds	chr11_gencode_MAP3K11_ENSG00000173327.3	0.597408749764358
cds	chr11_gencode_MAP4K2_ENSG00000168067.7	0.735230922592968
cds	chr11_gencode_MAP6_ENSG00000171533.7	0.946883374222364
cds	chr11_gencode_MAPK8IP1_ENSG00000121653.7	0.585972837391839
cds	chr11_gencode_MARK2_ENSG00000072518.16	0.375021947043031
cds	chr11_gencode_MCAM_ENSG00000076706.10	0.757836046947161
cds	chr11_gencode_MDK_ENSG00000110492.11	0.999999999999917
cds	chr11_gencode_ME3_ENSG00000151376.12	0.337723124413016
cds	chr11_gencode_MED17_ENSG00000042429.6	0.843765821074875
cds	chr11_gencode_MED19_ENSG00000156603.10	0.870891911055806
cds	chr11_gencode_MEN1_ENSG00000133895.10	0.978789328193058
cds	chr11_gencode_METTL12_ENSG00000214756.3	0.769813917579235
cds	chr11_gencode_METTL15_ENSG00000169519.15	0.803464151482133
cds	chr11_gencode_MFRP_ENSG00000235718.3	0.806220561785677
cds	chr11_gencode_MICAL2_ENSG00000133816.9	0.991690968469381
cds	chr11_gencode_MICALCL_ENSG00000133808.4	0.18217146097025
cds	chr11_gencode_MMP10_ENSG00000166670.5	0.975222079844158
cds	chr11_gencode_MMP13_ENSG00000137745.7	0.242492771868903
cds	chr11_gencode_MMP1_ENSG00000196611.4	0.42229567732421
cds	chr11_gencode_MMP20_ENSG00000137674.3	0.56996217713437
cds	chr11_gencode_MMP26_ENSG00000167346.3	0.442888750256551
cds	chr11_gencode_MMP27_ENSG00000137675.4	0.995521454846173
cds	chr11_gencode_MMP3_ENSG00000149968.7	0.715850159828463
cds	chr11_gencode_MMP7_ENSG00000137673.4	0.53130976339259
cds	chr11_gencode_MMP8_ENSG00000118113.7	0.924263357658064
cds	chr11_gencode_MOB2_ENSG00000182208.8	0.619297293844507
cds	chr11_gencode_MOGAT2_ENSG00000166391.10	0.953208118260264
cds	chr11_gencode_MPEG1_ENSG00000197629.5	0.735014704298055
cds	chr11_gencode_MPPED2_ENSG00000066382.12	0.840438858380284
cds	chr11_gencode_MPZL2_ENSG00000149573.4	0.633569682986575
cds	chr11_gencode_MPZL3_ENSG00000160588.5	0.153951466434355
cds	chr11_gencode_MRE11A_ENSG00000020922.8	0.53194731821626
cds	chr11_gencode_MRGPRD_ENSG00000172938.3	0.124864393421744
cds	chr11_gencode_MRGPRE_ENSG00000184350.8	0.658887929744002
cds	chr11_gencode_MRGPRF_ENSG00000172935.8	0.775753497756658
cds	chr11_gencode_MRGPRG_ENSG00000182170.3	0.935061370113392
cds	chr11_gencode_MRGPRX1_ENSG00000170255.6	0.908506279378086
cds	chr11_gencode_MRGPRX2_ENSG00000183695.2	0.873241128087518
cds	chr11_gencode_MRGPRX3_ENSG00000179826.5	0.439419089354063
cds	chr11_gencode_MRGPRX4_ENSG00000179817.3	0.541195748340904
cds	chr11_gencode_MRPL11_ENSG00000174547.9	0.0592570105601151
cds	chr11_gencode_MRPL16_ENSG00000166902.4	0.888725430303782
cds	chr11_gencode_MRPL17_ENSG00000158042.8	0.999999999999964
cds	chr11_gencode_MRPL21_ENSG00000197345.8	0.906538621344235
cds	chr11_gencode_MRPL23_ENSG00000214026.6	0.749417160484874
cds	chr11_gencode_MRPL48_ENSG00000175581.9	0.172200307799723
cds	chr11_gencode_MRPL49_ENSG00000149792.4	1
cds	chr11_gencode_MRVI1_ENSG00000072952.14	0.713280887497144
cds	chr11_gencode_MS4A10_ENSG00000172689.1	0.181311541294463
cds	chr11_gencode_MS4A12_ENSG00000071203.5	0.995507738807547
cds	chr11_gencode_MS4A13_ENSG00000204979.3	0.889445279928528
cds	chr11_gencode_MS4A14_ENSG00000166928.6	0.439072420523145
cds	chr11_gencode_MS4A15_ENSG00000166961.10	0.437078620991996
cds	chr11_gencode_MS4A18_ENSG00000214782.3	0.204129872774837
cds	chr11_gencode_MS4A1_ENSG00000156738.13	0.976343420123149
cds	chr11_gencode_MS4A2_ENSG00000149534.4	0.93834289947352
cds	chr11_gencode_MS4A3_ENSG00000149516.9	0.479911848429712
cds	chr11_gencode_MS4A4A_ENSG00000110079.12	0.423073676417453
cds	chr11_gencode_MS4A4E_ENSG00000214787.4	0.0235803766156104
cds	chr11_gencode_MS4A5_ENSG00000166930.2	0.682742379498007
cds	chr11_gencode_MS4A6A_ENSG00000110077.10	0.682745692779321
cds	chr11_gencode_MS4A6E_ENSG00000166926.4	0.794972829289188
cds	chr11_gencode_MS4A7_ENSG00000166927.8	0.0421742938166174
cds	chr11_gencode_MS4A8_ENSG00000166959.3	0.821694797914788
cds	chr11_gencode_MSANTD2_ENSG00000120458.5	0.999917923780974
cds	chr11_gencode_MSANTD4_ENSG00000170903.6	0.974985729858281
cds	chr11_gencode_MTA2_ENSG00000149480.2	0.208975523810808
cds	chr11_gencode_MTCH2_ENSG00000109919.5	0.417855041987387
cds	chr11_gencode_MTL5_ENSG00000132749.6	0.800252212463114
cds	chr11_gencode_MTMR2_ENSG00000087053.14	0.986998069517821
cds	chr11_gencode_MTNR1B_ENSG00000134640.2	0.0550906960110037
cds	chr11_gencode_MTRNR2L8_ENSG00000255823.1	0.272652359214674
cds	chr11_gencode_MUC15_ENSG00000169550.8	0.634774347265449
cds	chr11_gencode_MUC2_ENSG00000198788.7	0.98522506414183
cds	chr11_gencode_MUC5AC_ENSG00000215182.6	0.0656319615047996
cds	chr11_gencode_MUC5B_ENSG00000117983.13	0.999912184444478
cds	chr11_gencode_MUC6_ENSG00000184956.11	0.998970563810967
cds	chr11_gencode_MUS81_ENSG00000172732.7	0.771076448778245
cds	chr11_gencode_MYBPC3_ENSG00000134571.6	0.850593373418909
cds	chr11_gencode_MYEOV_ENSG00000172927.3	0.898643987276305
cds	chr11_gencode_MYO7A_ENSG00000137474.15	0.937438200565352
cds	chr11_gencode_MYOD1_ENSG00000129152.3	0.99981563704985
cds	chr11_gencode_MYRF_ENSG00000124920.9	0.714795636137028
cds	chr11_gencode_NAA40_ENSG00000110583.8	0.78392253501042
cds	chr11_gencode_NAALAD2_ENSG00000077616.6	0.842685172796402
cds	chr11_gencode_NAALADL1_ENSG00000168060.10	0.725244975580123
cds	chr11_gencode_NADSYN1_ENSG00000172890.7	0.959406976023668
cds	chr11_gencode_NAP1L4_ENSG00000205531.8	0.96722133725324
cds	chr11_gencode_NARS2_ENSG00000137513.5	0.994727393882515
cds	chr11_gencode_NAT10_ENSG00000135372.4	0.954793914956287
cds	chr11_gencode_NAV2_ENSG00000166833.15	0.39810668616983
cds	chr11_gencode_NCAM1_ENSG00000149294.12	0.899726202264296
cds	chr11_gencode_NCAPD3_ENSG00000151503.8	0.932545291710387
cds	chr11_gencode_NCR3LG1_ENSG00000188211.4	0.990376839081271
cds	chr11_gencode_NDUFC2-KCTD14_ENSG00000259112.1	0.227580335406424
cds	chr11_gencode_NDUFC2_ENSG00000151366.8	0.244985623765719
cds	chr11_gencode_NDUFS3_ENSG00000213619.5	0.748593141151261
cds	chr11_gencode_NDUFS8_ENSG00000110717.6	0.761854196094535
cds	chr11_gencode_NDUFV1_ENSG00000167792.7	0.938285168260109
cds	chr11_gencode_NELL1_ENSG00000165973.13	0.491712102531173
cds	chr11_gencode_NEU3_ENSG00000162139.5	0.979578534704711
cds	chr11_gencode_NFRKB_ENSG00000170322.10	0.999648854897544
cds	chr11_gencode_NLRP10_ENSG00000182261.3	0.237389199983844
cds	chr11_gencode_NLRP14_ENSG00000158077.4	0.450526188016221
cds	chr11_gencode_NLRP6_ENSG00000174885.8	0.994707348229792
cds	chr11_gencode_NLRX1_ENSG00000160703.11	0.54768340713866
cds	chr11_gencode_NNMT_ENSG00000166741.3	0.0179048401932949
cds	chr11_gencode_NOX4_ENSG00000086991.8	0.770354000279902
cds	chr11_gencode_NPAS4_ENSG00000174576.4	0.0143288261634867
cds	chr11_gencode_NPAT_ENSG00000149308.12	0.915618040704419
cds	chr11_gencode_NR1H3_ENSG00000025434.14	0.399693576761755
cds	chr11_gencode_NRGN_ENSG00000154146.8	1
cds	chr11_gencode_NRIP3_ENSG00000175352.6	0.138017984981994
cds	chr11_gencode_NRXN2_ENSG00000110076.14	0.999392653852696
cds	chr11_gencode_NTM_ENSG00000182667.10	0.220935377628922
cds	chr11_gencode_NUCB2_ENSG00000070081.11	0.999999999999953
cds	chr11_gencode_NUDT22_ENSG00000149761.4	0.841432352861586
cds	chr11_gencode_NUDT8_ENSG00000167799.5	0.963639399712232
cds	chr11_gencode_NUMA1_ENSG00000137497.13	0.895905514464324
cds	chr11_gencode_NUP160_ENSG00000030066.9	0.865042775143741
cds	chr11_gencode_NUP98_ENSG00000110713.11	0.577667383685024
cds	chr11_gencode_NXF1_ENSG00000162231.9	0.648057017625043
cds	chr11_gencode_NXPE1_ENSG00000095110.3	0.64729640281116
cds	chr11_gencode_NXPE2_ENSG00000204361.7	0.588110654364191
cds	chr11_gencode_NXPE4_ENSG00000137634.5	0.461055468346721
cds	chr11_gencode_OAF_ENSG00000184232.4	0.792093255414697
cds	chr11_gencode_ODF3_ENSG00000177947.9	0.746484468337461
cds	chr11_gencode_OLFML1_ENSG00000183801.3	0.8865293424725
cds	chr11_gencode_OMP_ENSG00000254550.1	0.667070130108176
cds	chr11_gencode_OOSP1_ENSG00000214788.1	0.616193068532276
cds	chr11_gencode_OPCML_ENSG00000183715.9	0.323889927450945
cds	chr11_gencode_OR10A2_ENSG00000170790.4	0.725619167712205
cds	chr11_gencode_OR10A3_ENSG00000170683.5	0.348656954561188
cds	chr11_gencode_OR10A4_ENSG00000170782.3	0.120363917308846
cds	chr11_gencode_OR10A5_ENSG00000166363.4	0.895640585988292
cds	chr11_gencode_OR10A6_ENSG00000175393.2	0.319135616926242
cds	chr11_gencode_OR10AG1_ENSG00000174970.2	0.154058174594865
cds	chr11_gencode_OR10D3_ENSG00000197309.2	0.503253121463155
cds	chr11_gencode_OR10G4_ENSG00000254737.1	0.40728507771601
cds	chr11_gencode_OR10G6_ENSG00000198674.3	0.257132804247233
cds	chr11_gencode_OR10G7_ENSG00000182634.7	0.982206881237847
cds	chr11_gencode_OR10G8_ENSG00000234560.3	0.483320703446584
cds	chr11_gencode_OR10G9_ENSG00000236981.1	0.305660829331919
cds	chr11_gencode_OR10Q1_ENSG00000180475.4	0.505490802328312
cds	chr11_gencode_OR10S1_ENSG00000196248.4	0.963276673971269
cds	chr11_gencode_OR10V1_ENSG00000172289.2	0.434505673807736
cds	chr11_gencode_OR10W1_ENSG00000172772.3	0.806707862345051
cds	chr11_gencode_OR1S1_ENSG00000172774.6	0.494467583193728
cds	chr11_gencode_OR1S2_ENSG00000197887.3	0.582106942570582
cds	chr11_gencode_OR2AG1_ENSG00000170803.4	0.424096838988768
cds	chr11_gencode_OR2AG2_ENSG00000188124.2	0.400583724031801
cds	chr11_gencode_OR2AT4_ENSG00000171561.3	0.999999999999923
cds	chr11_gencode_OR2D2_ENSG00000166368.2	0.646307140943355
cds	chr11_gencode_OR2D3_ENSG00000178358.3	0.940493422638012
cds	chr11_gencode_OR4A15_ENSG00000181958.3	0.000797456044790511
cds	chr11_gencode_OR4A16_ENSG00000181961.2	0.0224785246292951
cds	chr11_gencode_OR4A47_ENSG00000237388.2	0.321197914341023
cds	chr11_gencode_OR4A5_ENSG00000221840.2	0.320559224813913
cds	chr11_gencode_OR4B1_ENSG00000175619.2	0.341668223075729
cds	chr11_gencode_OR4C11_ENSG00000172188.4	0.362761819384891
cds	chr11_gencode_OR4C12_ENSG00000221954.2	0.06824454724144
cds	chr11_gencode_OR4C13_ENSG00000258817.1	0.159041191362873
cds	chr11_gencode_OR4C15_ENSG00000181939.2	0.0889053618363643
cds	chr11_gencode_OR4C16_ENSG00000181935.3	0.18077387964191
cds	chr11_gencode_OR4C3_ENSG00000176547.7	0.0293487051208857
cds	chr11_gencode_OR4C46_ENSG00000185926.1	0.0160397188015947
cds	chr11_gencode_OR4C5_ENSG00000176540.3	0.00027294421077655
cds	chr11_gencode_OR4C6_ENSG00000181903.3	0.850900481363266
cds	chr11_gencode_OR4D10_ENSG00000254466.1	0.806702468831581
cds	chr11_gencode_OR4D11_ENSG00000176200.1	0.150510368371224
cds	chr11_gencode_OR4D5_ENSG00000171014.2	0.0844868738340719
cds	chr11_gencode_OR4D6_ENSG00000166884.2	0.0687488825720094
cds	chr11_gencode_OR4D9_ENSG00000172742.4	0.802919831734149
cds	chr11_gencode_OR4P4_ENSG00000181927.2	0.00372381875210281
cds	chr11_gencode_OR4S1_ENSG00000176555.1	0.546977528279554
cds	chr11_gencode_OR4S2_ENSG00000174982.2	0.289976710001533
cds	chr11_gencode_OR4X1_ENSG00000176567.1	0.423083777597973
cds	chr11_gencode_OR4X2_ENSG00000172208.3	0.00306641097347414
cds	chr11_gencode_OR51A2_ENSG00000205496.1	0.928061086636605
cds	chr11_gencode_OR51A4_ENSG00000205497.2	0.135306145828233
cds	chr11_gencode_OR51A7_ENSG00000176895.8	0.703261944117801
cds	chr11_gencode_OR51B2_ENSG00000184881.2	0.2262894705798
cds	chr11_gencode_OR51B4_ENSG00000183251.3	0.491264288264054
cds	chr11_gencode_OR51B5_ENSG00000242180.2	0.850175525294271
cds	chr11_gencode_OR51B6_ENSG00000176239.7	0.261321199284731
cds	chr11_gencode_OR51D1_ENSG00000197428.2	0.950056539256737
cds	chr11_gencode_OR51E1_ENSG00000180785.8	0.998263539376547
cds	chr11_gencode_OR51E2_ENSG00000167332.7	0.109460091570194
cds	chr11_gencode_OR51F1_ENSG00000188069.3	0.547539699013015
cds	chr11_gencode_OR51F2_ENSG00000176925.5	0.949367040492569
cds	chr11_gencode_OR51G1_ENSG00000176879.2	0.807049669032294
cds	chr11_gencode_OR51G2_ENSG00000176893.3	0.93089511895554
cds	chr11_gencode_OR51H1P_ENSG00000176904.1	0.308228617636969
cds	chr11_gencode_OR51I1_ENSG00000167359.8	0.400696389915941
cds	chr11_gencode_OR51I2_ENSG00000187918.3	0.761239324482558
cds	chr11_gencode_OR51J1_ENSG00000184321.1	0.248055288657094
cds	chr11_gencode_OR51L1_ENSG00000176798.1	0.214364528058987
cds	chr11_gencode_OR51M1_ENSG00000184698.3	0.232350045414264
cds	chr11_gencode_OR51Q1_ENSG00000167360.4	0.28768660879477
cds	chr11_gencode_OR51S1_ENSG00000176922.2	0.17080403644721
cds	chr11_gencode_OR51T1_ENSG00000176900.2	0.701822435496898
cds	chr11_gencode_OR51V1_ENSG00000176742.1	0.147399131184582
cds	chr11_gencode_OR52A1_ENSG00000182070.4	0.619373398152997
cds	chr11_gencode_OR52A5_ENSG00000171944.1	0.216098557178865
cds	chr11_gencode_OR52B1P_ENSG00000180909.1	0.157224295992284
cds	chr11_gencode_OR52B2_ENSG00000255307.1	0.255550925469212
cds	chr11_gencode_OR52B4_ENSG00000221996.2	0.772911510009449
cds	chr11_gencode_OR52B6_ENSG00000187747.2	0.582541242415834
cds	chr11_gencode_OR52D1_ENSG00000181609.5	0.905449418209878
cds	chr11_gencode_OR52E2_ENSG00000176787.2	0.552944113634526
cds	chr11_gencode_OR52E4_ENSG00000180974.2	0.00940914336147743
cds	chr11_gencode_OR52E6_ENSG00000205409.3	0.571728877013896
cds	chr11_gencode_OR52E8_ENSG00000183269.5	0.762859966927306
cds	chr11_gencode_OR52H1_ENSG00000181616.7	0.43598712521792
cds	chr11_gencode_OR52I1_ENSG00000232268.4	0.874212344304868
cds	chr11_gencode_OR52I2_ENSG00000226288.1	0.189815684350444
cds	chr11_gencode_OR52J3_ENSG00000205495.1	0.0377424733303625
cds	chr11_gencode_OR52K1_ENSG00000196778.2	0.79311051954218
cds	chr11_gencode_OR52K2_ENSG00000181963.5	0.708458707682779
cds	chr11_gencode_OR52L1_ENSG00000183313.4	0.208744727516949
cds	chr11_gencode_OR52M1_ENSG00000197790.1	0.794834988003048
cds	chr11_gencode_OR52N1_ENSG00000181001.1	0.664537546185252
cds	chr11_gencode_OR52N2_ENSG00000180988.2	0.969746953920184
cds	chr11_gencode_OR52N4_ENSG00000181074.3	0.0116907803069538
cds	chr11_gencode_OR52N5_ENSG00000181009.4	0.534827435856419
cds	chr11_gencode_OR52R1_ENSG00000176937.8	0.428802001438852
cds	chr11_gencode_OR52W1_ENSG00000175485.2	0.992677337276915
cds	chr11_gencode_OR56A1_ENSG00000180934.5	0.673813122851353
cds	chr11_gencode_OR56A3_ENSG00000184478.6	0.689483118149395
cds	chr11_gencode_OR56A4_ENSG00000183389.4	0.483875913108026
cds	chr11_gencode_OR56B1_ENSG00000181023.5	0.226389268177079
cds	chr11_gencode_OR56B3P_ENSG00000180913.2	0.00502390296332833
cds	chr11_gencode_OR56B4_ENSG00000180919.3	0.45979661778264
cds	chr11_gencode_OR5A1_ENSG00000172320.2	0.470756705008455
cds	chr11_gencode_OR5A2_ENSG00000172324.4	0.518011002808125
cds	chr11_gencode_OR5AK2_ENSG00000181273.2	0.00749416511352031
cds	chr11_gencode_OR5AN1_ENSG00000176495.2	0.659916170435077
cds	chr11_gencode_OR5AP2_ENSG00000172464.2	0.921410695749768
cds	chr11_gencode_OR5AR1_ENSG00000172459.2	0.997304591045619
cds	chr11_gencode_OR5AS1_ENSG00000181785.1	0.0690283766692121
cds	chr11_gencode_OR5B12_ENSG00000172362.2	0.804204139515848
cds	chr11_gencode_OR5B17_ENSG00000197786.3	0.317170573337528
cds	chr11_gencode_OR5B21_ENSG00000198283.2	0.577530783668227
cds	chr11_gencode_OR5B2_ENSG00000172365.2	0.361081192527888
cds	chr11_gencode_OR5B3_ENSG00000172769.2	0.218729250218442
cds	chr11_gencode_OR5D13_ENSG00000198877.1	0.286113256314671
cds	chr11_gencode_OR5D14_ENSG00000186113.1	0.229869153440954
cds	chr11_gencode_OR5D16_ENSG00000205029.1	0.527592576896163
cds	chr11_gencode_OR5D18_ENSG00000186119.6	0.00142736053454527
cds	chr11_gencode_OR5F1_ENSG00000149133.1	0.0002371133621766
cds	chr11_gencode_OR5I1_ENSG00000167825.3	0.222850911968584
cds	chr11_gencode_OR5J2_ENSG00000174957.1	0.0396999785089522
cds	chr11_gencode_OR5L1_ENSG00000186117.2	0.63466144101953
cds	chr11_gencode_OR5L2_ENSG00000205030.1	0.172189052931091
cds	chr11_gencode_OR5M10_ENSG00000254834.2	0.759721366443954
cds	chr11_gencode_OR5M11_ENSG00000255223.2	0.0137426586781681
cds	chr11_gencode_OR5M1_ENSG00000255012.1	0.741579633950751
cds	chr11_gencode_OR5M3_ENSG00000174937.2	0.0498719897422763
cds	chr11_gencode_OR5M8_ENSG00000181371.2	0.945376732900409
cds	chr11_gencode_OR5M9_ENSG00000150269.1	0.399271459915882
cds	chr11_gencode_OR5P2_ENSG00000183303.2	0.979851380819178
cds	chr11_gencode_OR5P3_ENSG00000182334.1	0.945629629274583
cds	chr11_gencode_OR5R1_ENSG00000174942.1	0.971088201250343
cds	chr11_gencode_OR5T1_ENSG00000181698.2	0.0447201907486218
cds	chr11_gencode_OR5T2_ENSG00000181718.4	0.206390618479861
cds	chr11_gencode_OR5T3_ENSG00000172489.5	0.0311241890222619
cds	chr11_gencode_OR5W2_ENSG00000187612.1	0.0231597910741708
cds	chr11_gencode_OR6A2_ENSG00000184933.3	0.0127564754303197
cds	chr11_gencode_OR6M1_ENSG00000196099.4	0.262462356733406
cds	chr11_gencode_OR6Q1_ENSG00000172381.3	0.258829345942098
cds	chr11_gencode_OR6T1_ENSG00000181499.2	0.0706208074518665
cds	chr11_gencode_OR6X1_ENSG00000221931.2	0.665685672295929
cds	chr11_gencode_OR8A1_ENSG00000196119.5	0.605141339423626
cds	chr11_gencode_OR8B12_ENSG00000170953.2	0.518804134982382
cds	chr11_gencode_OR8B2_ENSG00000204293.2	0.740919257544544
cds	chr11_gencode_OR8B3_ENSG00000196661.3	0.507550023530279
cds	chr11_gencode_OR8B4_ENSG00000198657.3	0.287989178574525
cds	chr11_gencode_OR8B8_ENSG00000197125.2	0.372496873949745
cds	chr11_gencode_OR8D1_ENSG00000196341.2	0.20455748089011
cds	chr11_gencode_OR8D2_ENSG00000197263.2	0.257485836141615
cds	chr11_gencode_OR8D4_ENSG00000181518.2	0.109473563685546
cds	chr11_gencode_OR8G1_ENSG00000197849.4	0.469438190422697
cds	chr11_gencode_OR8G5_ENSG00000255298.2	0.0802547159582746
cds	chr11_gencode_OR8H1_ENSG00000181693.6	0.00598356035985955
cds	chr11_gencode_OR8H2_ENSG00000181767.1	9.8672196226708e-05
cds	chr11_gencode_OR8H3_ENSG00000181761.5	0.611988980698692
cds	chr11_gencode_OR8I2_ENSG00000172154.4	0.962407254781664
cds	chr11_gencode_OR8J1_ENSG00000172487.3	0.348615960189809
cds	chr11_gencode_OR8J3_ENSG00000167822.1	0.380368629367144
cds	chr11_gencode_OR8K1_ENSG00000150261.2	0.437558982601455
cds	chr11_gencode_OR8K3_ENSG00000181689.1	0.203734410978711
cds	chr11_gencode_OR8K5_ENSG00000181752.3	0.589888509878987
cds	chr11_gencode_OR8U1_ENSG00000172199.1	0.0133512466609647
cds	chr11_gencode_OR9G1_ENSG00000174914.1	0.98825607806357
cds	chr11_gencode_OR9G4_ENSG00000172457.5	0.145002587265866
cds	chr11_gencode_OR9I1_ENSG00000172377.1	0.441110185007936
cds	chr11_gencode_OR9Q1_ENSG00000186509.3	0.422155842189217
cds	chr11_gencode_OR9Q2_ENSG00000186513.2	0.632141613314367
cds	chr11_gencode_ORAOV1_ENSG00000149716.8	0.406066474789212
cds	chr11_gencode_OSBPL5_ENSG00000021762.15	0.693447791918235
cds	chr11_gencode_OSBP_ENSG00000110048.7	0.988319744006527
cds	chr11_gencode_OTOG_ENSG00000188162.6	0.99073226396929
cds	chr11_gencode_OTUB1_ENSG00000167770.7	0.970382580080598
cds	chr11_gencode_OVCH2_ENSG00000183378.7	0.899015059009973
cds	chr11_gencode_OVOL1_ENSG00000172818.5	0.796499261339342
cds	chr11_gencode_P2RX3_ENSG00000109991.4	0.380936364717262
cds	chr11_gencode_P2RY2_ENSG00000175591.7	0.739985131278868
cds	chr11_gencode_P2RY6_ENSG00000171631.10	0.202607548118335
cds	chr11_gencode_P4HA3_ENSG00000149380.7	0.599009507458629
cds	chr11_gencode_PAAF1_ENSG00000175575.8	0.0903025079413123
cds	chr11_gencode_PACS1_ENSG00000175115.7	0.842528098768224
cds	chr11_gencode_PACSIN3_ENSG00000165912.11	0.649177334560371
cds	chr11_gencode_PAFAH1B2_ENSG00000168092.9	0.89427062612247
cds	chr11_gencode_PAK1_ENSG00000149269.5	0.987579329880201
cds	chr11_gencode_PAMR1_ENSG00000149090.7	0.264951707212875
cds	chr11_gencode_PANX1_ENSG00000110218.4	0.989859379090802
cds	chr11_gencode_PANX3_ENSG00000154143.2	0.385026499213305
cds	chr11_gencode_PARVA_ENSG00000197702.7	0.188007593280282
cds	chr11_gencode_PATE1_ENSG00000171053.5	0.820530644979005
cds	chr11_gencode_PATE2_ENSG00000196844.4	0.824089413557031
cds	chr11_gencode_PATE3_ENSG00000236027.2	0.736070218608076
cds	chr11_gencode_PATE4_ENSG00000237353.2	0.0979095769581855
cds	chr11_gencode_PATL1_ENSG00000166889.13	0.832847286918021
cds	chr11_gencode_PAX6_ENSG00000007372.16	0.993436545566821
cds	chr11_gencode_PCF11_ENSG00000165494.6	0.055719562398525
cds	chr11_gencode_PCNXL3_ENSG00000197136.4	0.990089525103691
cds	chr11_gencode_PCSK7_ENSG00000160613.8	0.729969588006837
cds	chr11_gencode_PC_ENSG00000173599.9	0.145758658362004
cds	chr11_gencode_PDDC1_ENSG00000177225.12	0.352875070794705
cds	chr11_gencode_PDE2A_ENSG00000186642.11	0.426866155528612
cds	chr11_gencode_PDE3B_ENSG00000152270.4	0.349917678962031
cds	chr11_gencode_PDGFD_ENSG00000170962.8	0.108155762804449
cds	chr11_gencode_PDHX_ENSG00000110435.7	0.577727026077586
cds	chr11_gencode_PDZD3_ENSG00000172367.11	0.600035453894318
cds	chr11_gencode_PELI3_ENSG00000174516.10	0.43509462791372
cds	chr11_gencode_PEX16_ENSG00000121680.11	0.590771512634038
cds	chr11_gencode_PGA3_ENSG00000229859.4	0.992153164594519
cds	chr11_gencode_PGA4_ENSG00000229183.4	0.979191733715489
cds	chr11_gencode_PGA5_ENSG00000256713.3	0.771828662873499
cds	chr11_gencode_PGAP2_ENSG00000148985.15	0.421620597230933
cds	chr11_gencode_PGM2L1_ENSG00000165434.6	0.885124040981565
cds	chr11_gencode_PGR_ENSG00000082175.10	0.999931251833677
cds	chr11_gencode_PHF21A_ENSG00000135365.11	0.993546068482114
cds	chr11_gencode_PHLDA2_ENSG00000181649.5	1
cds	chr11_gencode_PHLDB1_ENSG00000019144.12	0.23443513227895
cds	chr11_gencode_PHOX2A_ENSG00000165462.5	0.735981719638078
cds	chr11_gencode_PHRF1_ENSG00000070047.7	0.938834515455583
cds	chr11_gencode_PICALM_ENSG00000073921.13	0.684274524463236
cds	chr11_gencode_PIDD_ENSG00000177595.13	0.95653399271919
cds	chr11_gencode_PIH1D2_ENSG00000150773.6	0.789640663356844
cds	chr11_gencode_PIK3C2A_ENSG00000011405.9	0.939649397526057
cds	chr11_gencode_PITPNM1_ENSG00000110697.8	0.499973661601632
cds	chr11_gencode_PIWIL4_ENSG00000134627.7	0.934478876430472
cds	chr11_gencode_PKNOX2_ENSG00000165495.11	0.837698324072364
cds	chr11_gencode_PKP3_ENSG00000184363.5	0.982434312224233
cds	chr11_gencode_PLA2G16_ENSG00000176485.6	0.865432825804867
cds	chr11_gencode_PLAC1L_ENSG00000149507.2	0.442416248262374
cds	chr11_gencode_PLCB3_ENSG00000149782.7	0.982653099355809
cds	chr11_gencode_PLEKHA7_ENSG00000166689.10	0.999122312609379
cds	chr11_gencode_PLEKHB1_ENSG00000021300.9	0.999999999999941
cds	chr11_gencode_PNPLA2_ENSG00000177666.11	0.990631829443716
cds	chr11_gencode_POLA2_ENSG00000014138.4	0.525540953830598
cds	chr11_gencode_POLD3_ENSG00000077514.4	0.0115917196290214
cds	chr11_gencode_POLD4_ENSG00000175482.4	0.242348821237412
cds	chr11_gencode_POLR2G_ENSG00000168002.7	1
cds	chr11_gencode_POLR2L_ENSG00000177700.5	0.297110141951203
cds	chr11_gencode_POU2AF1_ENSG00000110777.7	0.112534009692447
cds	chr11_gencode_POU2F3_ENSG00000137709.5	0.944966496818444
cds	chr11_gencode_PPFIA1_ENSG00000131626.11	0.314378534910814
cds	chr11_gencode_PPFIBP2_ENSG00000166387.7	0.984828570707659
cds	chr11_gencode_PPME1_ENSG00000214517.4	0.402484701267729
cds	chr11_gencode_PPP1CA_ENSG00000172531.10	0.371566851306231
cds	chr11_gencode_PPP1R14B_ENSG00000173457.6	0.802630426985335
cds	chr11_gencode_PPP1R32_ENSG00000162148.6	0.76703132995498
cds	chr11_gencode_PPP2R1B_ENSG00000137713.11	0.73252854799359
cds	chr11_gencode_PPP2R5B_ENSG00000068971.9	0.725816244966824
cds	chr11_gencode_PPP6R3_ENSG00000110075.10	0.645468866030339
cds	chr11_gencode_PRCP_ENSG00000137509.6	0.912122856932526
cds	chr11_gencode_PRDM10_ENSG00000170325.10	0.874938068991776
cds	chr11_gencode_PRDM11_ENSG00000019485.8	0.578099930734558
cds	chr11_gencode_PRDX5_ENSG00000126432.9	0.497580082187889
cds	chr11_gencode_PRG2_ENSG00000186652.5	0.693900064967661
cds	chr11_gencode_PRG3_ENSG00000156575.2	0.690537176974451
cds	chr11_gencode_PRKCDBP_ENSG00000170955.9	0.942824330779488
cds	chr11_gencode_PRKRIR_ENSG00000137492.3	0.303256829087211
cds	chr11_gencode_PRMT3_ENSG00000185238.8	0.69148225240686
cds	chr11_gencode_PRPF19_ENSG00000110107.4	0.946023464715509
cds	chr11_gencode_PRR5L_ENSG00000135362.9	0.738456072499119
cds	chr11_gencode_PRRG4_ENSG00000135378.3	0.191536043351379
cds	chr11_gencode_PRSS23_ENSG00000150687.7	0.145681635115315
cds	chr11_gencode_PSMA1_ENSG00000129084.13	1
cds	chr11_gencode_PSMC3_ENSG00000165916.4	0.875849533552827
cds	chr11_gencode_PSMD13_ENSG00000185627.13	0.963099354586514
cds	chr11_gencode_PTDSS2_ENSG00000174915.7	0.974571905575576
cds	chr11_gencode_PTGDR2_ENSG00000183134.4	0.995150590935094
cds	chr11_gencode_PTH_ENSG00000152266.2	0.680123151213659
cds	chr11_gencode_PTPMT1_ENSG00000110536.9	0.241209839734152
cds	chr11_gencode_PTPN5_ENSG00000110786.13	0.999083186214503
cds	chr11_gencode_PTPRCAP_ENSG00000213402.2	0.10991724794854
cds	chr11_gencode_PTPRJ_ENSG00000149177.8	0.108122439500887
cds	chr11_gencode_PTS_ENSG00000150787.3	0.999999999999962
cds	chr11_gencode_PUS3_ENSG00000110060.4	0.275833651946645
cds	chr11_gencode_PVRL1_ENSG00000110400.6	0.934662674198638
cds	chr11_gencode_PYGM_ENSG00000068976.9	0.795919444685521
cds	chr11_gencode_QSER1_ENSG00000060749.10	0.499882803320569
cds	chr11_gencode_RAB1B_ENSG00000174903.10	0.581275415043417
cds	chr11_gencode_RAB30_ENSG00000137502.5	0.28929284929526
cds	chr11_gencode_RAB38_ENSG00000123892.7	0.860695368048333
cds	chr11_gencode_RAB39A_ENSG00000179331.2	0.624724016179674
cds	chr11_gencode_RAB3IL1_ENSG00000167994.7	0.966127794678646
cds	chr11_gencode_RAB6A_ENSG00000175582.15	0.426057101978636
cds	chr11_gencode_RAD9A_ENSG00000172613.3	0.122401891597811
cds	chr11_gencode_RAG1_ENSG00000166349.5	0.62394446550729
cds	chr11_gencode_RAG2_ENSG00000175097.3	0.145139393955067
cds	chr11_gencode_RAPSN_ENSG00000165917.5	0.59979184155055
cds	chr11_gencode_RARRES3_ENSG00000133321.6	0.724983736423825
cds	chr11_gencode_RASGRP2_ENSG00000068831.14	0.804672078538961
cds	chr11_gencode_RASSF7_ENSG00000099849.10	0.806023769015536
cds	chr11_gencode_RBM14-RBM4_ENSG00000248643.5	0.51888048389411
cds	chr11_gencode_RBM14_ENSG00000239306.4	0.946779554963965
cds	chr11_gencode_RBM4B_ENSG00000173914.7	0.868821643898902
cds	chr11_gencode_RBM4_ENSG00000173933.15	0.671547739908754
cds	chr11_gencode_RBM7_ENSG00000076053.6	1
cds	chr11_gencode_RBMXL2_ENSG00000170748.5	0.991538719101213
cds	chr11_gencode_RCE1_ENSG00000173653.3	0.384560485909122
cds	chr11_gencode_RCN1_ENSG00000049449.4	0.983571781317124
cds	chr11_gencode_RCOR2_ENSG00000167771.5	1
cds	chr11_gencode_RDX_ENSG00000137710.10	0.361184715698053
cds	chr11_gencode_RELA_ENSG00000173039.14	0.991222364227371
cds	chr11_gencode_RELT_ENSG00000054967.8	0.571848178433074
cds	chr11_gencode_REXO2_ENSG00000076043.5	0.561999354536577
cds	chr11_gencode_RHOD_ENSG00000173156.2	0.567168674374043
cds	chr11_gencode_RHOG_ENSG00000177105.9	0.825634956574434
cds	chr11_gencode_RIC3_ENSG00000166405.10	0.548112033862893
cds	chr11_gencode_RIC8A_ENSG00000177963.8	0.986993593874946
cds	chr11_gencode_RIN1_ENSG00000174791.6	0.971451511188806
cds	chr11_gencode_RNASEH2C_ENSG00000172922.4	0.497081531854651
cds	chr11_gencode_RNF121_ENSG00000137522.13	0.715263092023361
cds	chr11_gencode_RNF141_ENSG00000110315.2	0.56462289347619
cds	chr11_gencode_RNF169_ENSG00000166439.5	0.648962018890011
cds	chr11_gencode_RNF214_ENSG00000167257.6	0.0299142000195079
cds	chr11_gencode_RNF26_ENSG00000173456.4	0.689413847853023
cds	chr11_gencode_RNH1_ENSG00000023191.12	0.595748607407031
cds	chr11_gencode_ROBO3_ENSG00000154134.10	0.980691882548497
cds	chr11_gencode_ROBO4_ENSG00000154133.10	0.991799575493826
cds	chr11_gencode_ROM1_ENSG00000149489.4	0.351453861665066
cds	chr11_gencode_RP11-111M22.2_ENSG00000179240.4	0.960451601948133
cds	chr11_gencode_RP11-113D6.10_ENSG00000189332.4	0.0159591691412219
cds	chr11_gencode_RP11-113D6.6_ENSG00000255470.1	0.959031149331845
cds	chr11_gencode_RP11-1167A19.2_ENSG00000255038.1	0.258912192735648
cds	chr11_gencode_RP11-295K3.1_ENSG00000250644.1	0.0890015137495227
cds	chr11_gencode_RP11-315O6.2_ENSG00000255482.1	0.165056911204951
cds	chr11_gencode_RP11-664I21.6_ENSG00000254943.1	0.999999999999976
cds	chr11_gencode_RP11-712L6.5_ENSG00000255062.1	0.0207533206116867
cds	chr11_gencode_RP11-770J1.4_ENSG00000255384.1	1
cds	chr11_gencode_RP11-770J1.5_ENSG00000254873.1	0.0967327436487142
cds	chr11_gencode_RP11-794P6.2_ENSG00000255093.1	0.806214916198042
cds	chr11_gencode_RP11-817J15.3_ENSG00000255798.1	0.293573081433471
cds	chr11_gencode_RP11-831H9.11_ENSG00000255432.1	1
cds	chr11_gencode_RP11-849H4.2_ENSG00000254469.3	0.964314286925824
cds	chr11_gencode_RP11-867G23.8_ENSG00000255468.2	0.123491827967081
cds	chr11_gencode_RP11-872D17.8_ENSG00000254979.1	0.999999999999995
cds	chr11_gencode_RPL27A_ENSG00000166441.8	1
cds	chr11_gencode_RPLP2_ENSG00000177600.4	0.57048900185898
cds	chr11_gencode_RPS13_ENSG00000110700.2	0.674271420833076
cds	chr11_gencode_RPS25_ENSG00000118181.6	0.999999999999993
cds	chr11_gencode_RPS3_ENSG00000149273.10	0.576955975555944
cds	chr11_gencode_RPS6KA4_ENSG00000162302.8	0.970265529373859
cds	chr11_gencode_RPS6KB2_ENSG00000175634.10	0.750448871680957
cds	chr11_gencode_RPUSD4_ENSG00000165526.4	0.43767508244452
cds	chr11_gencode_RRAS2_ENSG00000133818.8	0.530239778424632
cds	chr11_gencode_RRM1_ENSG00000167325.10	0.993462186528766
cds	chr11_gencode_RRP8_ENSG00000132275.6	0.64462434604947
cds	chr11_gencode_RSF1_ENSG00000048649.9	0.844189308334233
cds	chr11_gencode_RTN3_ENSG00000133318.9	0.675384824673607
cds	chr11_gencode_RTN4RL2_ENSG00000186907.3	0.999999999999978
cds	chr11_gencode_SAA1_ENSG00000173432.6	0.151139734199611
cds	chr11_gencode_SAA2_ENSG00000134339.4	0.894150710578866
cds	chr11_gencode_SAA4_ENSG00000148965.4	0.864119984900977
cds	chr11_gencode_SAAL1_ENSG00000166788.5	0.315209560390363
cds	chr11_gencode_SAC3D1_ENSG00000168061.9	0.903664286381329
cds	chr11_gencode_SART1_ENSG00000175467.10	0.98302223657899
cds	chr11_gencode_SBF2_ENSG00000133812.10	0.731920379226035
cds	chr11_gencode_SC5D_ENSG00000109929.5	0.435841864079585
cds	chr11_gencode_SCGB1A1_ENSG00000149021.2	1
cds	chr11_gencode_SCGB1C1_ENSG00000188076.2	0.454039848297768
cds	chr11_gencode_SCGB1D1_ENSG00000168515.3	0.122098355016545
cds	chr11_gencode_SCGB1D2_ENSG00000124935.3	0.589378086537603
cds	chr11_gencode_SCGB1D4_ENSG00000197745.1	0.164840731832377
cds	chr11_gencode_SCGB2A1_ENSG00000124939.4	0.605816146468505
cds	chr11_gencode_SCGB2A2_ENSG00000110484.6	1
cds	chr11_gencode_SCN2B_ENSG00000149575.5	0.673669973030961
cds	chr11_gencode_SCN3B_ENSG00000166257.4	0.5293879589916
cds	chr11_gencode_SCN4B_ENSG00000177098.4	0.977121669132095
cds	chr11_gencode_SCT_ENSG00000070031.3	0.999999999999943
cds	chr11_gencode_SCUBE2_ENSG00000175356.8	0.874644722594044
cds	chr11_gencode_SCYL1_ENSG00000142186.12	0.978915038723982
cds	chr11_gencode_SDHAF2_ENSG00000167985.2	0.0177881461643082
cds	chr11_gencode_SDHD_ENSG00000204370.4	0.701280857507499
cds	chr11_gencode_SERGEF_ENSG00000129158.6	0.918624162446528
cds	chr11_gencode_SERPING1_ENSG00000149131.11	0.0330450634407204
cds	chr11_gencode_SERPINH1_ENSG00000149257.9	0.961479372794462
cds	chr11_gencode_SESN3_ENSG00000149212.6	0.985260189405816
cds	chr11_gencode_SF1_ENSG00000168066.16	0.817137243057421
cds	chr11_gencode_SF3B2_ENSG00000087365.10	0.855673042665374
cds	chr11_gencode_SHANK2_ENSG00000162105.12	0.984485074267106
cds	chr11_gencode_SIAE_ENSG00000110013.8	0.819741108136212
cds	chr11_gencode_SIDT2_ENSG00000149577.11	0.895528570430507
cds	chr11_gencode_SIGIRR_ENSG00000185187.8	0.745648365711331
cds	chr11_gencode_SIK2_ENSG00000170145.4	0.902036752240352
cds	chr11_gencode_SIK3_ENSG00000160584.11	0.991630494563082
cds	chr11_gencode_SIPA1_ENSG00000213445.4	0.977715295758604
cds	chr11_gencode_SIRT3_ENSG00000142082.10	0.545520512648967
cds	chr11_gencode_SLC15A3_ENSG00000110446.5	0.541143067816664
cds	chr11_gencode_SLC17A6_ENSG00000091664.7	0.790083572638481
cds	chr11_gencode_SLC1A2_ENSG00000110436.7	0.249928716911535
cds	chr11_gencode_SLC22A10_ENSG00000184999.7	0.798120802077582
cds	chr11_gencode_SLC22A11_ENSG00000168065.11	0.530810514055831
cds	chr11_gencode_SLC22A12_ENSG00000197891.7	0.923894619957167
cds	chr11_gencode_SLC22A18AS_ENSG00000254827.1	0.397894428664285
cds	chr11_gencode_SLC22A18_ENSG00000110628.9	0.963925003934511
cds	chr11_gencode_SLC22A24_ENSG00000197658.5	0.115025907187548
cds	chr11_gencode_SLC22A25_ENSG00000196600.8	0.117469720702502
cds	chr11_gencode_SLC22A6_ENSG00000197901.7	0.32477876453156
cds	chr11_gencode_SLC22A8_ENSG00000149452.11	0.247292219649781
cds	chr11_gencode_SLC22A9_ENSG00000149742.5	0.339345898747492
cds	chr11_gencode_SLC25A22_ENSG00000177542.6	0.532841009194656
cds	chr11_gencode_SLC25A45_ENSG00000162241.8	0.758121967525514
cds	chr11_gencode_SLC29A2_ENSG00000174669.7	0.957304164891539
cds	chr11_gencode_SLC35C1_ENSG00000181830.7	0.699168544985157
cds	chr11_gencode_SLC35F2_ENSG00000110660.10	0.991182417926427
cds	chr11_gencode_SLC36A4_ENSG00000180773.10	0.415318136703388
cds	chr11_gencode_SLC37A2_ENSG00000134955.7	0.914865617720576
cds	chr11_gencode_SLC37A4_ENSG00000137700.12	0.727141022753601
cds	chr11_gencode_SLC39A13_ENSG00000165915.9	0.959785535178765
cds	chr11_gencode_SLC3A2_ENSG00000168003.12	0.331848059242351
cds	chr11_gencode_SLC43A1_ENSG00000149150.4	0.521783999670319
cds	chr11_gencode_SLC43A3_ENSG00000134802.13	0.276130523932537
cds	chr11_gencode_SLC5A12_ENSG00000148942.10	0.828697108039985
cds	chr11_gencode_SLC6A5_ENSG00000165970.7	0.698466273456967
cds	chr11_gencode_SLCO2B1_ENSG00000137491.10	0.831429256414302
cds	chr11_gencode_SLN_ENSG00000170290.3	0.411700173390297
cds	chr11_gencode_SMCO4_ENSG00000166002.2	0.999999999999984
cds	chr11_gencode_SMPD1_ENSG00000166311.5	0.560141552419323
cds	chr11_gencode_SMTNL1_ENSG00000214872.4	0.822940566612468
cds	chr11_gencode_SNX15_ENSG00000110025.8	0.772712756567752
cds	chr11_gencode_SNX19_ENSG00000120451.6	0.429038921107143
cds	chr11_gencode_SNX32_ENSG00000172803.13	0.649021657101842
cds	chr11_gencode_SORL1_ENSG00000137642.8	0.996234770656997
cds	chr11_gencode_SOX6_ENSG00000110693.11	0.994135370948226
cds	chr11_gencode_SPA17_ENSG00000064199.2	0.122209976644042
cds	chr11_gencode_SPATA19_ENSG00000166118.3	0.809749602016893
cds	chr11_gencode_SPCS2_ENSG00000118363.7	0.468427082173229
cds	chr11_gencode_SPDYC_ENSG00000204710.2	0.908648014624018
cds	chr11_gencode_SPI1_ENSG00000066336.7	0.633019486661725
cds	chr11_gencode_SPTBN2_ENSG00000173898.7	0.944889993518848
cds	chr11_gencode_SPTY2D1_ENSG00000179119.10	0.412832235121181
cds	chr11_gencode_SRPR_ENSG00000182934.7	0.353548880651021
cds	chr11_gencode_SSH3_ENSG00000172830.8	0.869462609360685
cds	chr11_gencode_SSRP1_ENSG00000149136.3	0.953622508954026
cds	chr11_gencode_SSSCA1_ENSG00000173465.3	1
cds	chr11_gencode_ST14_ENSG00000149418.6	0.788680957048318
cds	chr11_gencode_ST3GAL4_ENSG00000110080.14	0.611375178816094
cds	chr11_gencode_ST5_ENSG00000166444.13	0.99898776962938
cds	chr11_gencode_STARD10_ENSG00000214530.3	0.957196005197608
cds	chr11_gencode_STIM1_ENSG00000167323.5	0.718291224007504
cds	chr11_gencode_STIP1_ENSG00000168439.12	0.451595417368642
cds	chr11_gencode_STK33_ENSG00000130413.11	0.951370683411362
cds	chr11_gencode_STT3A_ENSG00000134910.8	0.915596114603263
cds	chr11_gencode_STX3_ENSG00000166900.10	0.182289399443706
cds	chr11_gencode_STX5_ENSG00000162236.7	0.426818932758142
cds	chr11_gencode_SUV420H1_ENSG00000110066.10	0.16513520327447
cds	chr11_gencode_SVIP_ENSG00000198168.4	1
cds	chr11_gencode_SWAP70_ENSG00000133789.10	0.835919500529908
cds	chr11_gencode_SYT12_ENSG00000173227.9	0.412706464537394
cds	chr11_gencode_SYT13_ENSG00000019505.3	0.87544336959299
cds	chr11_gencode_SYT7_ENSG00000011347.5	0.23030285695085
cds	chr11_gencode_SYT8_ENSG00000149043.12	0.950306138199394
cds	chr11_gencode_SYT9_ENSG00000170743.12	0.999232780966104
cds	chr11_gencode_SYTL2_ENSG00000137501.12	0.942314142243971
cds	chr11_gencode_SYVN1_ENSG00000162298.12	0.122024683097194
cds	chr11_gencode_TAF10_ENSG00000166337.5	0.999999999999948
cds	chr11_gencode_TAF1D_ENSG00000166012.10	0.99999999999996
cds	chr11_gencode_TAF6L_ENSG00000162227.3	0.891327227248697
cds	chr11_gencode_TAGLN_ENSG00000149591.12	0.796311895168206
cds	chr11_gencode_TALDO1_ENSG00000177156.6	0.282806575399478
cds	chr11_gencode_TBC1D10C_ENSG00000175463.7	0.89222825159804
cds	chr11_gencode_TBCEL_ENSG00000154114.8	0.603467058690238
cds	chr11_gencode_TBRG1_ENSG00000154144.8	0.64692011009122
cds	chr11_gencode_TBX10_ENSG00000167800.9	0.886578683939518
cds	chr11_gencode_TCIRG1_ENSG00000110719.5	0.74624878453355
cds	chr11_gencode_TCN1_ENSG00000134827.3	0.850335534467533
cds	chr11_gencode_TCP11L1_ENSG00000176148.11	0.4721186905413
cds	chr11_gencode_TEAD1_ENSG00000187079.10	0.316984132606327
cds	chr11_gencode_TECTA_ENSG00000109927.5	0.985475689118607
cds	chr11_gencode_TENM4_ENSG00000149256.10	0.921804815394696
cds	chr11_gencode_TEX12_ENSG00000150783.5	0.00308518726062199
cds	chr11_gencode_TEX40_ENSG00000219435.3	0.967325425847744
cds	chr11_gencode_THRSP_ENSG00000151365.2	0.709371100031618
cds	chr11_gencode_THY1_ENSG00000154096.9	0.77531957560926
cds	chr11_gencode_THYN1_ENSG00000151500.10	0.481359850318352
cds	chr11_gencode_TH_ENSG00000180176.10	0.99915424500335
cds	chr11_gencode_TIGD3_ENSG00000173825.6	0.375429266196343
cds	chr11_gencode_TIMM10B_ENSG00000132286.7	0.99999999999997
cds	chr11_gencode_TIMM10_ENSG00000134809.4	0.999999999999971
cds	chr11_gencode_TIMM8B_ENSG00000150779.7	0.999999999999939
cds	chr11_gencode_TIRAP_ENSG00000150455.9	0.999999999999943
cds	chr11_gencode_TM7SF2_ENSG00000149809.10	0.999999999999828
cds	chr11_gencode_TMEM109_ENSG00000110108.5	0.851997734177281
cds	chr11_gencode_TMEM123_ENSG00000152558.10	0.571120471130418
cds	chr11_gencode_TMEM126A_ENSG00000171202.2	1
cds	chr11_gencode_TMEM126B_ENSG00000171204.8	0.906564242042497
cds	chr11_gencode_TMEM132A_ENSG00000006118.10	0.529981118055282
cds	chr11_gencode_TMEM133_ENSG00000170647.2	0.258921308564515
cds	chr11_gencode_TMEM134_ENSG00000172663.4	0.617270169128342
cds	chr11_gencode_TMEM135_ENSG00000166575.12	0.923309204795261
cds	chr11_gencode_TMEM136_ENSG00000181264.4	0.726182346033569
cds	chr11_gencode_TMEM138_ENSG00000149483.7	0.106924895332528
cds	chr11_gencode_TMEM151A_ENSG00000179292.4	0.3223482794299
cds	chr11_gencode_TMEM179B_ENSG00000185475.4	0.261149315787241
cds	chr11_gencode_TMEM216_ENSG00000187049.5	0.373193910685467
cds	chr11_gencode_TMEM218_ENSG00000150433.5	0.176125483082232
cds	chr11_gencode_TMEM223_ENSG00000168569.7	0.631870367444497
cds	chr11_gencode_TMEM225_ENSG00000204300.2	0.155839111701029
cds	chr11_gencode_TMEM258_ENSG00000134825.9	0.442591980500572
cds	chr11_gencode_TMEM25_ENSG00000149582.11	0.379165616043913
cds	chr11_gencode_TMEM41B_ENSG00000166471.6	0.280601302216394
cds	chr11_gencode_TMEM45B_ENSG00000151715.3	0.939601968124507
cds	chr11_gencode_TMEM80_ENSG00000177042.10	0.641531811015273
cds	chr11_gencode_TMEM86A_ENSG00000151117.4	0.999999999999958
cds	chr11_gencode_TMEM9B_ENSG00000175348.6	0.780929251891545
cds	chr11_gencode_TMPRSS13_ENSG00000137747.10	0.367532511818958
cds	chr11_gencode_TMPRSS4_ENSG00000137648.12	0.859857071425463
cds	chr11_gencode_TMPRSS5_ENSG00000166682.6	0.554404555595589
cds	chr11_gencode_TMX2_ENSG00000213593.5	0.850808122803857
cds	chr11_gencode_TNKS1BP1_ENSG00000149115.9	0.436610961186302
cds	chr11_gencode_TNNI2_ENSG00000130598.11	0.262010686554446
cds	chr11_gencode_TNNT3_ENSG00000130595.12	0.98787281082593
cds	chr11_gencode_TOLLIP_ENSG00000078902.11	0.739368583924212
cds	chr11_gencode_TP53AIP1_ENSG00000120471.10	0.834105065913963
cds	chr11_gencode_TP53I11_ENSG00000175274.14	0.90059810359763
cds	chr11_gencode_TPBGL_ENSG00000261594.3	0.999994249628848
cds	chr11_gencode_TPCN2_ENSG00000162341.11	0.936311800022569
cds	chr11_gencode_TPH1_ENSG00000129167.5	0.961951839470687
cds	chr11_gencode_TPP1_ENSG00000166340.10	0.134880456296657
cds	chr11_gencode_TRAF6_ENSG00000175104.10	0.825073199481061
cds	chr11_gencode_TRAPPC4_ENSG00000196655.5	0.49213074587103
cds	chr11_gencode_TREH_ENSG00000118094.7	0.455617224979986
cds	chr11_gencode_TRIM21_ENSG00000132109.8	0.709853295327456
cds	chr11_gencode_TRIM22_ENSG00000132274.11	0.381447271790277
cds	chr11_gencode_TRIM29_ENSG00000137699.12	0.0494854827231782
cds	chr11_gencode_TRIM34_ENSG00000258659.2	0.502867695160479
cds	chr11_gencode_TRIM3_ENSG00000110171.14	0.95646115054977
cds	chr11_gencode_TRIM44_ENSG00000166326.5	0.09567896320319
cds	chr11_gencode_TRIM48_ENSG00000150244.8	0.242121932494101
cds	chr11_gencode_TRIM49B_ENSG00000182053.8	0.184547275569905
cds	chr11_gencode_TRIM49C_ENSG00000204449.2	0.634443047221015
cds	chr11_gencode_TRIM49D1_ENSG00000223417.4	0.99960565991448
cds	chr11_gencode_TRIM49_ENSG00000168930.9	0.62694035816943
cds	chr11_gencode_TRIM51_ENSG00000124900.8	0.0113936308275177
cds	chr11_gencode_TRIM5_ENSG00000132256.14	0.703720438747831
cds	chr11_gencode_TRIM6-TRIM34_ENSG00000258588.2	0.641363203708611
cds	chr11_gencode_TRIM64B_ENSG00000189253.7	0.490007603740632
cds	chr11_gencode_TRIM64C_ENSG00000214891.4	0.342570566428278
cds	chr11_gencode_TRIM66_ENSG00000166436.11	0.67271391415509
cds	chr11_gencode_TRIM68_ENSG00000167333.8	0.987047828513045
cds	chr11_gencode_TRIM6_ENSG00000121236.15	0.741360696336256
cds	chr11_gencode_TRIM77_ENSG00000214414.5	0.00492055627493046
[truncated: 53,958 more rows]
