# Supplementary material for: Non-coding cancer driver candidates identified with a sample- and position-specific model of the somatic mutation rate
Source: eLife journal article supplement (doi:10.7554/elife.21778), 2017-03-31
Supplement: supp [file elife-21778-supp-v2.zip › elife_poa_e21778_Figure_5_figure_supplement_2_source_data_1.txt]

type	scoring_scheme	n_significant
protein_coding_genes	conservation	64
protein_coding_genes	log_likelihoods	109
protein_coding_genes	n_mutations	52
promoters	conservation	160
promoters	log_likelihoods	177
promoters	n_mutations	124
splice_sites	conservation	3
splice_sites	log_likelihoods	6
splice_sites	n_mutations	2
3utrs	conservation	16
3utrs	log_likelihoods	45
3utrs	n_mutations	17
5utrs	conservation	86
5utrs	log_likelihoods	74
5utrs	n_mutations	37
