# Supplementary material for: Non-coding cancer driver candidates identified with a sample- and position-specific model of the somatic mutation rate
Source: eLife journal article supplement (doi:10.7554/elife.21778), 2017-03-31
Supplement: supp [file elife-21778-supp-v2.zip › elife_poa_e21778_Figure_5_figure_supplement_3_source_data_1.txt]

element_type	chr	id	region_length
protein_coding_genes	chr1	gencode::OR4F5::ENSG00000186092.4	918
protein_coding_genes	chr1	gencode::AL627309.1::ENSG00000237683.5	780
protein_coding_genes	chr1	gencode::OR4F29::ENSG00000235249.1	939
protein_coding_genes	chr1	gencode::OR4F16::ENSG00000185097.2	939
protein_coding_genes	chr1	gencode::AL669831.1::ENSG00000269831.1	129
protein_coding_genes	chr1	gencode::AL645608.2::ENSG00000269308.1	57
protein_coding_genes	chr1	gencode::AL645608.1::ENSG00000268179.1	336
protein_coding_genes	chr1	gencode::SAMD11::ENSG00000187634.6	2046
protein_coding_genes	chr1	gencode::NOC2L::ENSG00000188976.6	2250
protein_coding_genes	chr1	gencode::KLHL17::ENSG00000187961.9	1929
protein_coding_genes	chr1	gencode::PLEKHN1::ENSG00000187583.6	1992
protein_coding_genes	chr1	gencode::C1orf170::ENSG00000187642.5	2091
protein_coding_genes	chr1	gencode::HES4::ENSG00000188290.6	744
protein_coding_genes	chr1	gencode::ISG15::ENSG00000187608.5	498
protein_coding_genes	chr1	gencode::AGRN::ENSG00000188157.9	6138
protein_coding_genes	chr1	gencode::RNF223::ENSG00000237330.2	750
protein_coding_genes	chr1	gencode::C1orf159::ENSG00000131591.13	1230
protein_coding_genes	chr1	gencode::TTLL10::ENSG00000162571.9	2055
protein_coding_genes	chr1	gencode::TNFRSF18::ENSG00000186891.9	979
protein_coding_genes	chr1	gencode::TNFRSF4::ENSG00000186827.6	834
protein_coding_genes	chr1	gencode::SDF4::ENSG00000078808.12	1237
protein_coding_genes	chr1	gencode::B3GALT6::ENSG00000176022.3	990
protein_coding_genes	chr1	gencode::FAM132A::ENSG00000184163.3	909
protein_coding_genes	chr1	gencode::UBE2J2::ENSG00000160087.16	854
protein_coding_genes	chr1	gencode::SCNN1D::ENSG00000162572.15	2409
protein_coding_genes	chr1	gencode::ACAP3::ENSG00000131584.14	2505
protein_coding_genes	chr1	gencode::PUSL1::ENSG00000169972.7	912
protein_coding_genes	chr1	gencode::CPSF3L::ENSG00000127054.14	1956
protein_coding_genes	chr1	gencode::GLTPD1::ENSG00000224051.2	645
protein_coding_genes	chr1	gencode::TAS1R3::ENSG00000169962.4	2559
protein_coding_genes	chr1	gencode::DVL1::ENSG00000107404.13	2088
protein_coding_genes	chr1	gencode::MXRA8::ENSG00000162576.12	1401
protein_coding_genes	chr1	gencode::AURKAIP1::ENSG00000175756.9	600
protein_coding_genes	chr1	gencode::CCNL2::ENSG00000221978.7	1585
protein_coding_genes	chr1	gencode::RP4-758J18.2::ENSG00000224870.3	414
protein_coding_genes	chr1	gencode::MRPL20::ENSG00000242485.1	642
protein_coding_genes	chr1	gencode::ANKRD65::ENSG00000235098.4	1200
protein_coding_genes	chr1	gencode::TMEM88B::ENSG00000205116.3	492
protein_coding_genes	chr1	gencode::VWA1::ENSG00000179403.10	1338
protein_coding_genes	chr1	gencode::ATAD3C::ENSG00000215915.5	1236
protein_coding_genes	chr1	gencode::ATAD3B::ENSG00000160072.15	2055
protein_coding_genes	chr1	gencode::ATAD3A::ENSG00000197785.9	1905
protein_coding_genes	chr1	gencode::TMEM240::ENSG00000205090.4	522
protein_coding_genes	chr1	gencode::SSU72::ENSG00000160075.10	823
protein_coding_genes	chr1	gencode::AL645728.1::ENSG00000215014.3	303
protein_coding_genes	chr1	gencode::C1orf233::ENSG00000228594.1	681
protein_coding_genes	chr1	gencode::MIB2::ENSG00000197530.8	3213
protein_coding_genes	chr1	gencode::MMP23B::ENSG00000189409.8	1240
protein_coding_genes	chr1	gencode::CDK11B::ENSG00000248333.3	2495
protein_coding_genes	chr1	gencode::SLC35E2B::ENSG00000189339.7	1218
protein_coding_genes	chr1	gencode::CDK11A::ENSG00000008128.18	2418
protein_coding_genes	chr1	gencode::SLC35E2::ENSG00000215790.2	810
protein_coding_genes	chr1	gencode::NADK::ENSG00000008130.11	1943
protein_coding_genes	chr1	gencode::GNB1::ENSG00000078369.13	1023
protein_coding_genes	chr1	gencode::CALML6::ENSG00000169885.5	546
protein_coding_genes	chr1	gencode::TMEM52::ENSG00000178821.8	755
protein_coding_genes	chr1	gencode::C1orf222::ENSG00000142609.13	306
protein_coding_genes	chr1	gencode::GABRD::ENSG00000187730.6	1359
protein_coding_genes	chr1	gencode::PRKCZ::ENSG00000067606.11	1230
protein_coding_genes	chr1	gencode::C1orf86::ENSG00000162585.12	1358
protein_coding_genes	chr1	gencode::AL590822.2::ENSG00000269554.1	543
protein_coding_genes	chr1	gencode::AL590822.1::ENSG00000203301.2	654
protein_coding_genes	chr1	gencode::SKI::ENSG00000157933.9	2187
protein_coding_genes	chr1	gencode::MORN1::ENSG00000116151.9	1511
protein_coding_genes	chr1	gencode::AL589739.1::ENSG00000269753.1	462
protein_coding_genes	chr1	gencode::RER1::ENSG00000157916.14	701
protein_coding_genes	chr1	gencode::PEX10::ENSG00000157911.5	1041
protein_coding_genes	chr1	gencode::PLCH2::ENSG00000149527.13	4983
protein_coding_genes	chr1	gencode::PANK4::ENSG00000157881.9	2322
protein_coding_genes	chr1	gencode::HES5::ENSG00000197921.5	501
protein_coding_genes	chr1	gencode::TNFRSF14::ENSG00000157873.13	883
protein_coding_genes	chr1	gencode::FAM213B::ENSG00000157870.10	741
protein_coding_genes	chr1	gencode::MMEL1::ENSG00000142606.11	2340
protein_coding_genes	chr1	gencode::TTC34::ENSG00000215912.7	1701
protein_coding_genes	chr1	gencode::ACTRT2::ENSG00000169717.5	1134
protein_coding_genes	chr1	gencode::PRDM16::ENSG00000142611.12	3837
protein_coding_genes	chr1	gencode::ARHGEF16::ENSG00000130762.10	2264
protein_coding_genes	chr1	gencode::MEGF6::ENSG00000162591.11	4792
protein_coding_genes	chr1	gencode::TPRG1L::ENSG00000158109.10	819
protein_coding_genes	chr1	gencode::WRAP73::ENSG00000116213.11	1451
protein_coding_genes	chr1	gencode::TP73::ENSG00000078900.10	1950
protein_coding_genes	chr1	gencode::CCDC27::ENSG00000162592.4	1971
protein_coding_genes	chr1	gencode::SMIM1::ENSG00000235169.3	241
protein_coding_genes	chr1	gencode::LRRC47::ENSG00000130764.5	1752
protein_coding_genes	chr1	gencode::CEP104::ENSG00000116198.8	2947
protein_coding_genes	chr1	gencode::DFFB::ENSG00000169598.11	1229
protein_coding_genes	chr1	gencode::C1orf174::ENSG00000198912.6	732
protein_coding_genes	chr1	gencode::AJAP1::ENSG00000196581.6	1236
protein_coding_genes	chr1	gencode::NPHP4::ENSG00000131697.13	4281
protein_coding_genes	chr1	gencode::KCNAB2::ENSG00000069424.10	1743
protein_coding_genes	chr1	gencode::AL035406.1::ENSG00000268332.1	81
protein_coding_genes	chr1	gencode::CHD5::ENSG00000116254.13	5971
protein_coding_genes	chr1	gencode::RPL22::ENSG00000116251.5	406
protein_coding_genes	chr1	gencode::RNF207::ENSG00000158286.8	1905
protein_coding_genes	chr1	gencode::ICMT::ENSG00000116237.11	922
protein_coding_genes	chr1	gencode::HES3::ENSG00000173673.7	561
protein_coding_genes	chr1	gencode::GPR153::ENSG00000158292.6	1830
protein_coding_genes	chr1	gencode::ACOT7::ENSG00000097021.15	1409
protein_coding_genes	chr1	gencode::HES2::ENSG00000069812.7	620
protein_coding_genes	chr1	gencode::ESPN::ENSG00000187017.10	2565
protein_coding_genes	chr1	gencode::TNFRSF25::ENSG00000215788.5	1281
protein_coding_genes	chr1	gencode::PLEKHG5::ENSG00000171680.16	3449
protein_coding_genes	chr1	gencode::NOL9::ENSG00000162408.10	2109
protein_coding_genes	chr1	gencode::TAS1R1::ENSG00000173662.15	2526
protein_coding_genes	chr1	gencode::ZBTB48::ENSG00000204859.7	2067
protein_coding_genes	chr1	gencode::KLHL21::ENSG00000162413.12	1917
protein_coding_genes	chr1	gencode::PHF13::ENSG00000116273.5	903
protein_coding_genes	chr1	gencode::THAP3::ENSG00000041988.11	810
protein_coding_genes	chr1	gencode::DNAJC11::ENSG00000007923.11	1939
protein_coding_genes	chr1	gencode::CAMTA1::ENSG00000171735.14	5240
protein_coding_genes	chr1	gencode::VAMP3::ENSG00000049245.8	303
protein_coding_genes	chr1	gencode::PER3::ENSG00000049246.10	3637
protein_coding_genes	chr1	gencode::UTS2::ENSG00000049247.9	583
protein_coding_genes	chr1	gencode::TNFRSF9::ENSG00000049249.4	768
protein_coding_genes	chr1	gencode::PARK7::ENSG00000116288.8	570
protein_coding_genes	chr1	gencode::ERRFI1::ENSG00000116285.8	1464
protein_coding_genes	chr1	gencode::SLC45A1::ENSG00000162426.10	2349
protein_coding_genes	chr1	gencode::RERE::ENSG00000142599.13	4727
protein_coding_genes	chr1	gencode::ENO1::ENSG00000074800.9	1305
protein_coding_genes	chr1	gencode::CA6::ENSG00000131686.10	1306
protein_coding_genes	chr1	gencode::SLC2A7::ENSG00000197241.3	1539
protein_coding_genes	chr1	gencode::SLC2A5::ENSG00000142583.13	1786
protein_coding_genes	chr1	gencode::GPR157::ENSG00000180758.10	1008
protein_coding_genes	chr1	gencode::H6PD::ENSG00000049239.8	2409
protein_coding_genes	chr1	gencode::SPSB1::ENSG00000171621.9	822
protein_coding_genes	chr1	gencode::SLC25A33::ENSG00000171612.6	966
protein_coding_genes	chr1	gencode::TMEM201::ENSG00000188807.8	2020
protein_coding_genes	chr1	gencode::C1orf200::ENSG00000179840.5	504
protein_coding_genes	chr1	gencode::PIK3CD::ENSG00000171608.11	3337
protein_coding_genes	chr1	gencode::CLSTN1::ENSG00000171603.12	2946
protein_coding_genes	chr1	gencode::CTNNBIP1::ENSG00000178585.10	246
protein_coding_genes	chr1	gencode::LZIC::ENSG00000162441.7	636
protein_coding_genes	chr1	gencode::NMNAT1::ENSG00000173614.9	884
protein_coding_genes	chr1	gencode::RBP7::ENSG00000162444.11	405
protein_coding_genes	chr1	gencode::UBE4B::ENSG00000130939.14	4013
protein_coding_genes	chr1	gencode::KIF1B::ENSG00000054523.12	7000
protein_coding_genes	chr1	gencode::PGD::ENSG00000142657.16	1452
protein_coding_genes	chr1	gencode::APITD1-CORT::ENSG00000251503.3	495
protein_coding_genes	chr1	gencode::APITD1::ENSG00000175279.17	636
protein_coding_genes	chr1	gencode::CORT::ENSG00000241563.2	468
protein_coding_genes	chr1	gencode::DFFA::ENSG00000160049.7	1020
protein_coding_genes	chr1	gencode::PEX14::ENSG00000142655.8	1134
protein_coding_genes	chr1	gencode::CASZ1::ENSG00000130940.10	5284
protein_coding_genes	chr1	gencode::C1orf127::ENSG00000175262.10	2503
protein_coding_genes	chr1	gencode::TARDBP::ENSG00000120948.11	1301
protein_coding_genes	chr1	gencode::MASP2::ENSG00000009724.12	2075
protein_coding_genes	chr1	gencode::SRM::ENSG00000116649.5	909
protein_coding_genes	chr1	gencode::EXOSC10::ENSG00000171824.9	2819
protein_coding_genes	chr1	gencode::MTOR::ENSG00000198793.8	7650
protein_coding_genes	chr1	gencode::ANGPTL7::ENSG00000171819.4	1041
protein_coding_genes	chr1	gencode::UBIAD1::ENSG00000120942.9	1028
protein_coding_genes	chr1	gencode::PTCHD2::ENSG00000204624.6	4217
protein_coding_genes	chr1	gencode::FBXO2::ENSG00000116661.9	891
protein_coding_genes	chr1	gencode::FBXO44::ENSG00000132879.9	800
protein_coding_genes	chr1	gencode::FBXO6::ENSG00000116663.6	882
protein_coding_genes	chr1	gencode::MAD2L2::ENSG00000116670.10	675
protein_coding_genes	chr1	gencode::DRAXIN::ENSG00000162490.6	1050
protein_coding_genes	chr1	gencode::AGTRAP::ENSG00000177674.11	707
protein_coding_genes	chr1	gencode::C1orf167::ENSG00000215910.3	4431
protein_coding_genes	chr1	gencode::MTHFR::ENSG00000177000.6	2094
protein_coding_genes	chr1	gencode::CLCN6::ENSG00000011021.17	2966
protein_coding_genes	chr1	gencode::NPPA::ENSG00000175206.6	456
protein_coding_genes	chr1	gencode::NPPB::ENSG00000120937.8	405
protein_coding_genes	chr1	gencode::KIAA2013::ENSG00000116685.11	2022
protein_coding_genes	chr1	gencode::PLOD1::ENSG00000083444.12	2325
protein_coding_genes	chr1	gencode::MFN2::ENSG00000116688.12	2274
protein_coding_genes	chr1	gencode::MIIP::ENSG00000116691.6	1174
protein_coding_genes	chr1	gencode::TNFRSF8::ENSG00000120949.10	1788
protein_coding_genes	chr1	gencode::TNFRSF1B::ENSG00000028137.12	1397
protein_coding_genes	chr1	gencode::VPS13D::ENSG00000048707.9	13265
protein_coding_genes	chr1	gencode::DHRS3::ENSG00000162496.4	909
protein_coding_genes	chr1	gencode::AADACL4::ENSG00000204518.2	1224
protein_coding_genes	chr1	gencode::AADACL3::ENSG00000188984.7	1057
protein_coding_genes	chr1	gencode::C1orf158::ENSG00000157330.5	585
protein_coding_genes	chr1	gencode::PRAMEF12::ENSG00000116726.4	1452
protein_coding_genes	chr1	gencode::PRAMEF1::ENSG00000116721.9	1556
protein_coding_genes	chr1	gencode::PRAMEF11::ENSG00000204513.5	1311
protein_coding_genes	chr1	gencode::HNRNPCL1::ENSG00000179172.7	882
protein_coding_genes	chr1	gencode::PRAMEF2::ENSG00000120952.4	1425
protein_coding_genes	chr1	gencode::PRAMEF4::ENSG00000243073.3	1437
protein_coding_genes	chr1	gencode::PRAMEF10::ENSG00000187545.5	1425
protein_coding_genes	chr1	gencode::PRAMEF7::ENSG00000204510.1	1425
protein_coding_genes	chr1	gencode::PRAMEF6::ENSG00000232423.3	2862
protein_coding_genes	chr1	gencode::PRAMEF22::ENSG00000204508.3	1446
protein_coding_genes	chr1	gencode::WI2-3308P17.2::ENSG00000239810.2	273
protein_coding_genes	chr1	gencode::PRAMEF26::ENSG00000229571.2	1144
protein_coding_genes	chr1	gencode::PRAMEF3::ENSG00000204503.5	1446
protein_coding_genes	chr1	gencode::PRAMEF5::ENSG00000204502.2	1431
protein_coding_genes	chr1	gencode::PRAMEF8::ENSG00000182330.6	1425
protein_coding_genes	chr1	gencode::PRAMEF9::ENSG00000204501.2	1437
protein_coding_genes	chr1	gencode::PRAMEF13::ENSG00000204495.3	1425
protein_coding_genes	chr1	gencode::PRAMEF18::ENSG00000204491.2	1440
protein_coding_genes	chr1	gencode::PRAMEF16::ENSG00000204488.3	1425
protein_coding_genes	chr1	gencode::PRAMEF21::ENSG00000204486.3	1428
protein_coding_genes	chr1	gencode::PRAMEF15::ENSG00000157358.7	1437
protein_coding_genes	chr1	gencode::PRAMEF14::ENSG00000204481.6	1425
protein_coding_genes	chr1	gencode::PRAMEF19::ENSG00000204480.6	1440
protein_coding_genes	chr1	gencode::PRAMEF17::ENSG00000204479.4	1425
protein_coding_genes	chr1	gencode::PRAMEF20::ENSG00000204478.5	1428
protein_coding_genes	chr1	gencode::LRRC38::ENSG00000162494.5	885
protein_coding_genes	chr1	gencode::PDPN::ENSG00000162493.12	769
protein_coding_genes	chr1	gencode::PRDM2::ENSG00000116731.18	5219
protein_coding_genes	chr1	gencode::KAZN::ENSG00000189337.11	2580
protein_coding_genes	chr1	gencode::C1orf195::ENSG00000204464.3	499
protein_coding_genes	chr1	gencode::TMEM51::ENSG00000171729.9	762
protein_coding_genes	chr1	gencode::FHAD1::ENSG00000142621.15	4601
protein_coding_genes	chr1	gencode::EFHD2::ENSG00000142634.8	723
protein_coding_genes	chr1	gencode::CTRC::ENSG00000162438.7	807
protein_coding_genes	chr1	gencode::CELA2A::ENSG00000142615.7	810
protein_coding_genes	chr1	gencode::CELA2B::ENSG00000215704.5	810
protein_coding_genes	chr1	gencode::CASP9::ENSG00000132906.13	1359
protein_coding_genes	chr1	gencode::DNAJC16::ENSG00000116138.8	2378
protein_coding_genes	chr1	gencode::AGMAT::ENSG00000116771.5	1059
protein_coding_genes	chr1	gencode::DDI2::ENSG00000197312.7	1200
protein_coding_genes	chr1	gencode::RSC1A1::ENSG00000215695.1	1854
protein_coding_genes	chr1	gencode::PLEKHM2::ENSG00000116786.7	3060
protein_coding_genes	chr1	gencode::SLC25A34::ENSG00000162461.7	915
protein_coding_genes	chr1	gencode::TMEM82::ENSG00000162460.6	1032
protein_coding_genes	chr1	gencode::FBLIM1::ENSG00000162458.8	1357
protein_coding_genes	chr1	gencode::SPEN::ENSG00000065526.6	10995
protein_coding_genes	chr1	gencode::ZBTB17::ENSG00000116809.7	2803
protein_coding_genes	chr1	gencode::C1orf64::ENSG00000183888.4	510
protein_coding_genes	chr1	gencode::HSPB7::ENSG00000173641.13	872
protein_coding_genes	chr1	gencode::CLCNKA::ENSG00000186510.7	2064
protein_coding_genes	chr1	gencode::CLCNKB::ENSG00000184908.13	2212
protein_coding_genes	chr1	gencode::FAM131C::ENSG00000185519.8	843
protein_coding_genes	chr1	gencode::EPHA2::ENSG00000142627.9	2931
protein_coding_genes	chr1	gencode::ARHGEF19::ENSG00000142632.12	2409
protein_coding_genes	chr1	gencode::C1orf134::ENSG00000204377.3	252
protein_coding_genes	chr1	gencode::RSG1::ENSG00000132881.7	777
protein_coding_genes	chr1	gencode::FBXO42::ENSG00000037637.6	2154
protein_coding_genes	chr1	gencode::SZRD1::ENSG00000055070.12	587
protein_coding_genes	chr1	gencode::SPATA21::ENSG00000187144.7	2054
protein_coding_genes	chr1	gencode::NECAP2::ENSG00000157191.15	898
protein_coding_genes	chr1	gencode::AL355149.2::ENSG00000268674.1	510
protein_coding_genes	chr1	gencode::NBPF1::ENSG00000219481.6	3420
protein_coding_genes	chr1	gencode::AL137798.1::ENSG00000237847.2	510
protein_coding_genes	chr1	gencode::AL021920.2::ENSG00000268991.1	510
protein_coding_genes	chr1	gencode::CROCC::ENSG00000058453.12	6054
protein_coding_genes	chr1	gencode::MFAP2::ENSG00000117122.9	552
protein_coding_genes	chr1	gencode::ATP13A2::ENSG00000159363.13	3779
protein_coding_genes	chr1	gencode::SDHB::ENSG00000117118.5	843
protein_coding_genes	chr1	gencode::PADI2::ENSG00000117115.8	2002
protein_coding_genes	chr1	gencode::PADI1::ENSG00000142623.8	1992
protein_coding_genes	chr1	gencode::PADI3::ENSG00000142619.4	1995
protein_coding_genes	chr1	gencode::PADI4::ENSG00000159339.9	2036
protein_coding_genes	chr1	gencode::AC004824.2::ENSG00000269468.1	339
protein_coding_genes	chr1	gencode::RCC2::ENSG00000179051.9	1569
protein_coding_genes	chr1	gencode::ARHGEF10L::ENSG00000074964.12	4066
protein_coding_genes	chr1	gencode::ACTL8::ENSG00000117148.6	1101
protein_coding_genes	chr1	gencode::IGSF21::ENSG00000117154.7	1404
protein_coding_genes	chr1	gencode::KLHDC7A::ENSG00000179023.7	2334
protein_coding_genes	chr1	gencode::PAX7::ENSG00000009709.7	1679
protein_coding_genes	chr1	gencode::TAS1R2::ENSG00000179002.5	2520
protein_coding_genes	chr1	gencode::ALDH4A1::ENSG00000159423.12	1692
protein_coding_genes	chr1	gencode::IFFO2::ENSG00000169991.6	1554
protein_coding_genes	chr1	gencode::UBR4::ENSG00000127481.10	16031
protein_coding_genes	chr1	gencode::EMC1::ENSG00000127463.9	2990
protein_coding_genes	chr1	gencode::MRTO4::ENSG00000053372.4	720
protein_coding_genes	chr1	gencode::AKR7L::ENSG00000211454.9	462
protein_coding_genes	chr1	gencode::AKR7A3::ENSG00000162482.4	996
protein_coding_genes	chr1	gencode::AKR7A2::ENSG00000053371.8	1080
protein_coding_genes	chr1	gencode::PQLC2::ENSG00000040487.8	876
protein_coding_genes	chr1	gencode::CAPZB::ENSG00000077549.13	1093
protein_coding_genes	chr1	gencode::MINOS1::ENSG00000173436.9	237
protein_coding_genes	chr1	gencode::NBL1::ENSG00000158747.9	651
protein_coding_genes	chr1	gencode::MINOS1-NBL1::ENSG00000270136.1	546
protein_coding_genes	chr1	gencode::HTR6::ENSG00000158748.3	1323
protein_coding_genes	chr1	gencode::TMCO4::ENSG00000162542.9	1991
protein_coding_genes	chr1	gencode::RNF186::ENSG00000178828.5	684
protein_coding_genes	chr1	gencode::OTUD3::ENSG00000169914.5	1197
protein_coding_genes	chr1	gencode::PLA2G2E::ENSG00000188784.4	429
protein_coding_genes	chr1	gencode::PLA2G2A::ENSG00000188257.6	435
protein_coding_genes	chr1	gencode::PLA2G5::ENSG00000127472.6	417
protein_coding_genes	chr1	gencode::PLA2G2D::ENSG00000117215.10	438
protein_coding_genes	chr1	gencode::PLA2G2F::ENSG00000158786.4	636
protein_coding_genes	chr1	gencode::PLA2G2C::ENSG00000187980.6	499
protein_coding_genes	chr1	gencode::UBXN10::ENSG00000162543.5	843
protein_coding_genes	chr1	gencode::VWA5B1::ENSG00000158816.11	3899
protein_coding_genes	chr1	gencode::CAMK2N1::ENSG00000162545.5	237
protein_coding_genes	chr1	gencode::MUL1::ENSG00000090432.5	1059
protein_coding_genes	chr1	gencode::FAM43B::ENSG00000183114.6	990
protein_coding_genes	chr1	gencode::CDA::ENSG00000158825.5	441
protein_coding_genes	chr1	gencode::PINK1::ENSG00000158828.5	1746
protein_coding_genes	chr1	gencode::DDOST::ENSG00000244038.5	1371
protein_coding_genes	chr1	gencode::KIF17::ENSG00000117245.8	3090
protein_coding_genes	chr1	gencode::SH2D5::ENSG00000189410.7	1272
protein_coding_genes	chr1	gencode::HP1BP3::ENSG00000127483.13	1714
protein_coding_genes	chr1	gencode::EIF4G3::ENSG00000075151.15	5090
protein_coding_genes	chr1	gencode::ECE1::ENSG00000117298.10	2460
protein_coding_genes	chr1	gencode::NBPF3::ENSG00000142794.14	1977
protein_coding_genes	chr1	gencode::ALPL::ENSG00000162551.9	1575
protein_coding_genes	chr1	gencode::RAP1GAP::ENSG00000076864.15	2514
protein_coding_genes	chr1	gencode::USP48::ENSG00000090686.11	3222
protein_coding_genes	chr1	gencode::LDLRAD2::ENSG00000187942.7	819
protein_coding_genes	chr1	gencode::HSPG2::ENSG00000142798.12	13204
protein_coding_genes	chr1	gencode::CELA3B::ENSG00000219073.3	813
protein_coding_genes	chr1	gencode::CELA3A::ENSG00000142789.15	817
protein_coding_genes	chr1	gencode::CDC42::ENSG00000070831.11	842
protein_coding_genes	chr1	gencode::WNT4::ENSG00000162552.10	1056
protein_coding_genes	chr1	gencode::ZBTB40::ENSG00000184677.12	3720
protein_coding_genes	chr1	gencode::EPHA8::ENSG00000070886.6	3191
protein_coding_genes	chr1	gencode::C1QA::ENSG00000173372.12	738
protein_coding_genes	chr1	gencode::C1QC::ENSG00000159189.7	738
protein_coding_genes	chr1	gencode::C1QB::ENSG00000173369.11	762
protein_coding_genes	chr1	gencode::EPHB2::ENSG00000133216.12	3248
protein_coding_genes	chr1	gencode::LACTBL1::ENSG00000215906.4	1641
protein_coding_genes	chr1	gencode::C1orf234::ENSG00000227868.2	366
protein_coding_genes	chr1	gencode::KDM1A::ENSG00000004487.11	2643
protein_coding_genes	chr1	gencode::LUZP1::ENSG00000169641.9	3240
protein_coding_genes	chr1	gencode::HTR1D::ENSG00000179546.3	1134
protein_coding_genes	chr1	gencode::HNRNPR::ENSG00000125944.14	1911
protein_coding_genes	chr1	gencode::ZNF436::ENSG00000125945.10	1413
protein_coding_genes	chr1	gencode::C1orf213::ENSG00000249087.3	466
protein_coding_genes	chr1	gencode::TCEA3::ENSG00000204219.5	1069
protein_coding_genes	chr1	gencode::ASAP3::ENSG00000088280.14	2735
protein_coding_genes	chr1	gencode::E2F2::ENSG00000007968.6	1314
protein_coding_genes	chr1	gencode::ID3::ENSG00000117318.8	360
protein_coding_genes	chr1	gencode::MDS2::ENSG00000197880.4	423
protein_coding_genes	chr1	gencode::RPL11::ENSG00000142676.8	537
protein_coding_genes	chr1	gencode::TCEB3::ENSG00000011007.8	2397
protein_coding_genes	chr1	gencode::PITHD1::ENSG00000057757.5	636
protein_coding_genes	chr1	gencode::LYPLA2::ENSG00000011009.6	768
protein_coding_genes	chr1	gencode::GALE::ENSG00000117308.10	1047
protein_coding_genes	chr1	gencode::HMGCL::ENSG00000117305.10	978
protein_coding_genes	chr1	gencode::FUCA1::ENSG00000179163.11	1401
protein_coding_genes	chr1	gencode::CNR2::ENSG00000188822.6	1083
protein_coding_genes	chr1	gencode::PNRC2::ENSG00000189266.7	591
protein_coding_genes	chr1	gencode::SRSF10::ENSG00000188529.10	881
protein_coding_genes	chr1	gencode::MYOM3::ENSG00000142661.14	4536
protein_coding_genes	chr1	gencode::IL22RA1::ENSG00000142677.3	1725
protein_coding_genes	chr1	gencode::IFNLR1::ENSG00000185436.7	1695
protein_coding_genes	chr1	gencode::GRHL3::ENSG00000158055.11	2028
protein_coding_genes	chr1	gencode::STPG1::ENSG00000001460.13	1005
protein_coding_genes	chr1	gencode::NIPAL3::ENSG00000001461.12	1351
protein_coding_genes	chr1	gencode::RCAN3::ENSG00000117602.7	726
protein_coding_genes	chr1	gencode::NCMAP::ENSG00000184454.6	309
protein_coding_genes	chr1	gencode::SRRM1::ENSG00000133226.12	2795
protein_coding_genes	chr1	gencode::CLIC4::ENSG00000169504.10	762
protein_coding_genes	chr1	gencode::RUNX3::ENSG00000020633.14	1309
protein_coding_genes	chr1	gencode::SYF2::ENSG00000117614.5	732
protein_coding_genes	chr1	gencode::C1orf63::ENSG00000117616.13	935
protein_coding_genes	chr1	gencode::RHD::ENSG00000187010.14	1636
protein_coding_genes	chr1	gencode::TMEM50A::ENSG00000183726.6	474
protein_coding_genes	chr1	gencode::RHCE::ENSG00000188672.12	1445
protein_coding_genes	chr1	gencode::TMEM57::ENSG00000204178.5	1995
protein_coding_genes	chr1	gencode::LDLRAP1::ENSG00000157978.7	927
protein_coding_genes	chr1	gencode::MAN1C1::ENSG00000117643.10	1893
protein_coding_genes	chr1	gencode::SEPN1::ENSG00000162430.12	1784
protein_coding_genes	chr1	gencode::AL020996.1::ENSG00000223474.2	507
protein_coding_genes	chr1	gencode::MTFR1L::ENSG00000117640.13	879
protein_coding_genes	chr1	gencode::AUNIP::ENSG00000127423.6	1145
protein_coding_genes	chr1	gencode::PAQR7::ENSG00000182749.5	1041
protein_coding_genes	chr1	gencode::STMN1::ENSG00000117632.16	597
protein_coding_genes	chr1	gencode::PAFAH2::ENSG00000158006.9	1179
protein_coding_genes	chr1	gencode::EXTL1::ENSG00000158008.5	2031
protein_coding_genes	chr1	gencode::SLC30A2::ENSG00000158014.10	1119
protein_coding_genes	chr1	gencode::TRIM63::ENSG00000158022.6	1062
protein_coding_genes	chr1	gencode::PDIK1L::ENSG00000175087.5	1026
protein_coding_genes	chr1	gencode::FAM110D::ENSG00000197245.4	816
protein_coding_genes	chr1	gencode::ZNF593::ENSG00000142684.7	499
protein_coding_genes	chr1	gencode::CNKSR1::ENSG00000142675.13	2163
protein_coding_genes	chr1	gencode::CATSPER4::ENSG00000188782.3	1419
protein_coding_genes	chr1	gencode::CEP85::ENSG00000130695.9	2289
protein_coding_genes	chr1	gencode::SH3BGRL3::ENSG00000142669.9	333
protein_coding_genes	chr1	gencode::UBXN11::ENSG00000158062.16	1686
protein_coding_genes	chr1	gencode::CD52::ENSG00000169442.4	186
protein_coding_genes	chr1	gencode::AIM1L::ENSG00000176092.9	2364
protein_coding_genes	chr1	gencode::ZNF683::ENSG00000176083.13	1575
protein_coding_genes	chr1	gencode::LIN28A::ENSG00000131914.6	630
protein_coding_genes	chr1	gencode::DHDDS::ENSG00000117682.12	1148
protein_coding_genes	chr1	gencode::HMGN2::ENSG00000198830.6	273
protein_coding_genes	chr1	gencode::RPS6KA1::ENSG00000117676.9	2403
protein_coding_genes	chr1	gencode::ARID1A::ENSG00000117713.13	6858
protein_coding_genes	chr1	gencode::PIGV::ENSG00000060642.6	1482
protein_coding_genes	chr1	gencode::ZDHHC18::ENSG00000204160.7	1167
protein_coding_genes	chr1	gencode::SFN::ENSG00000175793.10	747
protein_coding_genes	chr1	gencode::GPN2::ENSG00000142751.10	964
protein_coding_genes	chr1	gencode::GPATCH3::ENSG00000198746.8	1578
protein_coding_genes	chr1	gencode::NR0B2::ENSG00000131910.4	774
protein_coding_genes	chr1	gencode::NUDC::ENSG00000090273.9	996
protein_coding_genes	chr1	gencode::C1orf172::ENSG00000175707.7	1197
protein_coding_genes	chr1	gencode::TRNP1::ENSG00000253368.3	684
protein_coding_genes	chr1	gencode::FAM46B::ENSG00000158246.7	1278
protein_coding_genes	chr1	gencode::SLC9A1::ENSG00000090020.6	2631
protein_coding_genes	chr1	gencode::WDTC1::ENSG00000142784.11	2034
protein_coding_genes	chr1	gencode::TMEM222::ENSG00000186501.10	627
protein_coding_genes	chr1	gencode::SYTL1::ENSG00000142765.13	1689
protein_coding_genes	chr1	gencode::MAP3K6::ENSG00000142733.10	3867
protein_coding_genes	chr1	gencode::FCN3::ENSG00000142748.8	900
protein_coding_genes	chr1	gencode::CD164L2::ENSG00000174950.6	717
protein_coding_genes	chr1	gencode::GPR3::ENSG00000181773.6	993
protein_coding_genes	chr1	gencode::WASF2::ENSG00000158195.6	1497
protein_coding_genes	chr1	gencode::AHDC1::ENSG00000126705.9	4812
protein_coding_genes	chr1	gencode::FGR::ENSG00000000938.8	1590
protein_coding_genes	chr1	gencode::IFI6::ENSG00000126709.10	417
protein_coding_genes	chr1	gencode::FAM76A::ENSG00000009780.11	1056
protein_coding_genes	chr1	gencode::STX12::ENSG00000117758.9	831
protein_coding_genes	chr1	gencode::PPP1R8::ENSG00000117751.13	1056
protein_coding_genes	chr1	gencode::AL109927.1::ENSG00000268552.1	171
protein_coding_genes	chr1	gencode::THEMIS2::ENSG00000130775.11	1932
protein_coding_genes	chr1	gencode::RPA2::ENSG00000117748.5	1111
protein_coding_genes	chr1	gencode::SMPDL3B::ENSG00000130768.10	1485
protein_coding_genes	chr1	gencode::XKR8::ENSG00000158156.7	1188
protein_coding_genes	chr1	gencode::EYA3::ENSG00000158161.11	1830
protein_coding_genes	chr1	gencode::PTAFR::ENSG00000169403.7	1029
protein_coding_genes	chr1	gencode::AL353354.1::ENSG00000215902.1	66
protein_coding_genes	chr1	gencode::AL353354.2::ENSG00000269804.1	147
protein_coding_genes	chr1	gencode::DNAJC8::ENSG00000126698.6	762
protein_coding_genes	chr1	gencode::ATPIF1::ENSG00000130770.13	411
protein_coding_genes	chr1	gencode::SESN2::ENSG00000130766.4	1443
protein_coding_genes	chr1	gencode::MED18::ENSG00000130772.9	627
protein_coding_genes	chr1	gencode::PHACTR4::ENSG00000204138.8	2155
protein_coding_genes	chr1	gencode::RCC1::ENSG00000180198.11	1359
protein_coding_genes	chr1	gencode::TRNAU1AP::ENSG00000180098.5	864
protein_coding_genes	chr1	gencode::RAB42::ENSG00000188060.6	318
protein_coding_genes	chr1	gencode::TAF12::ENSG00000120656.7	486
protein_coding_genes	chr1	gencode::GMEB1::ENSG00000162419.8	1722
protein_coding_genes	chr1	gencode::YTHDF2::ENSG00000198492.10	1740
protein_coding_genes	chr1	gencode::OPRD1::ENSG00000116329.6	1119
protein_coding_genes	chr1	gencode::EPB41::ENSG00000159023.14	2616
protein_coding_genes	chr1	gencode::TMEM200B::ENSG00000253304.1	924
protein_coding_genes	chr1	gencode::SRSF4::ENSG00000116350.11	1485
protein_coding_genes	chr1	gencode::MECR::ENSG00000116353.11	1122
protein_coding_genes	chr1	gencode::PTPRU::ENSG00000060656.15	4377
protein_coding_genes	chr1	gencode::MATN1::ENSG00000162510.5	1491
protein_coding_genes	chr1	gencode::LAPTM5::ENSG00000162511.7	789
protein_coding_genes	chr1	gencode::SDC3::ENSG00000162512.11	1411
protein_coding_genes	chr1	gencode::PUM1::ENSG00000134644.11	3678
protein_coding_genes	chr1	gencode::NKAIN1::ENSG00000084628.5	624
protein_coding_genes	chr1	gencode::SNRNP40::ENSG00000060688.8	1365
protein_coding_genes	chr1	gencode::ZCCHC17::ENSG00000121766.10	846
protein_coding_genes	chr1	gencode::FABP3::ENSG00000121769.3	402
protein_coding_genes	chr1	gencode::SERINC2::ENSG00000168528.7	1485
protein_coding_genes	chr1	gencode::AC114494.1::ENSG00000268950.1	423
protein_coding_genes	chr1	gencode::TINAGL1::ENSG00000142910.11	1855
protein_coding_genes	chr1	gencode::HCRTR1::ENSG00000121764.7	1361
protein_coding_genes	chr1	gencode::PEF1::ENSG00000162517.8	953
protein_coding_genes	chr1	gencode::COL16A1::ENSG00000084636.13	5088
protein_coding_genes	chr1	gencode::BAI2::ENSG00000121753.8	4788
protein_coding_genes	chr1	gencode::SPOCD1::ENSG00000134668.8	3651
protein_coding_genes	chr1	gencode::PTP4A2::ENSG00000184007.13	504
protein_coding_genes	chr1	gencode::AL136115.1::ENSG00000212673.1	318
protein_coding_genes	chr1	gencode::KHDRBS1::ENSG00000121774.13	1332
protein_coding_genes	chr1	gencode::TMEM39B::ENSG00000121775.13	1623
protein_coding_genes	chr1	gencode::KPNA6::ENSG00000025800.9	1630
protein_coding_genes	chr1	gencode::TXLNA::ENSG00000084652.11	1641
protein_coding_genes	chr1	gencode::CCDC28B::ENSG00000160050.10	781
protein_coding_genes	chr1	gencode::IQCC::ENSG00000160051.7	1641
protein_coding_genes	chr1	gencode::DCDC2B::ENSG00000222046.2	1050
protein_coding_genes	chr1	gencode::TMEM234::ENSG00000160055.15	823
protein_coding_genes	chr1	gencode::EIF3I::ENSG00000084623.7	978
protein_coding_genes	chr1	gencode::FAM167B::ENSG00000183615.5	492
protein_coding_genes	chr1	gencode::LCK::ENSG00000182866.12	1794
protein_coding_genes	chr1	gencode::HDAC1::ENSG00000116478.7	1449
protein_coding_genes	chr1	gencode::MARCKSL1::ENSG00000175130.6	588
protein_coding_genes	chr1	gencode::FAM229A::ENSG00000225828.1	384
protein_coding_genes	chr1	gencode::TSSK3::ENSG00000162526.6	807
protein_coding_genes	chr1	gencode::BSDC1::ENSG00000160058.14	1571
protein_coding_genes	chr1	gencode::ZBTB8B::ENSG00000273274.1	1488
protein_coding_genes	chr1	gencode::ZBTB8A::ENSG00000160062.10	1326
protein_coding_genes	chr1	gencode::ZBTB8OS::ENSG00000176261.11	638
protein_coding_genes	chr1	gencode::RBBP4::ENSG00000162521.14	1299
protein_coding_genes	chr1	gencode::SYNC::ENSG00000162520.10	1511
protein_coding_genes	chr1	gencode::KIAA1522::ENSG00000162522.6	3434
protein_coding_genes	chr1	gencode::YARS::ENSG00000134684.6	1587
protein_coding_genes	chr1	gencode::S100PBP::ENSG00000116497.13	1232
protein_coding_genes	chr1	gencode::FNDC5::ENSG00000160097.11	693
protein_coding_genes	chr1	gencode::HPCA::ENSG00000121905.5	582
protein_coding_genes	chr1	gencode::TMEM54::ENSG00000121900.14	669
protein_coding_genes	chr1	gencode::RNF19B::ENSG00000116514.12	2221
protein_coding_genes	chr1	gencode::FKSG48::ENSG00000267885.1	375
protein_coding_genes	chr1	gencode::AK2::ENSG00000004455.12	794
protein_coding_genes	chr1	gencode::ADC::ENSG00000142920.12	1503
protein_coding_genes	chr1	gencode::TRIM62::ENSG00000116525.9	1473
protein_coding_genes	chr1	gencode::ZNF362::ENSG00000160094.10	1263
protein_coding_genes	chr1	gencode::A3GALT2::ENSG00000184389.8	1055
protein_coding_genes	chr1	gencode::PHC2::ENSG00000134686.12	2717
protein_coding_genes	chr1	gencode::ZSCAN20::ENSG00000121903.10	3152
protein_coding_genes	chr1	gencode::CSMD2::ENSG00000121904.13	11239
protein_coding_genes	chr1	gencode::HMGB4::ENSG00000176256.6	561
protein_coding_genes	chr1	gencode::C1orf94::ENSG00000142698.10	1797
protein_coding_genes	chr1	gencode::GJB5::ENSG00000189280.3	822
protein_coding_genes	chr1	gencode::GJB4::ENSG00000189433.5	801
protein_coding_genes	chr1	gencode::GJB3::ENSG00000188910.7	813
protein_coding_genes	chr1	gencode::GJA4::ENSG00000187513.8	1002
protein_coding_genes	chr1	gencode::SMIM12::ENSG00000163866.8	279
protein_coding_genes	chr1	gencode::DLGAP3::ENSG00000116544.7	2940
protein_coding_genes	chr1	gencode::ZMYM6NB::ENSG00000243749.1	465
protein_coding_genes	chr1	gencode::ZMYM6::ENSG00000163867.12	4089
protein_coding_genes	chr1	gencode::ZMYM1::ENSG00000197056.5	3429
protein_coding_genes	chr1	gencode::SFPQ::ENSG00000116560.6	2124
protein_coding_genes	chr1	gencode::ZMYM4::ENSG00000146463.7	4647
protein_coding_genes	chr1	gencode::KIAA0319L::ENSG00000142687.13	3150
protein_coding_genes	chr1	gencode::NCDN::ENSG00000020129.11	2190
protein_coding_genes	chr1	gencode::TFAP2E::ENSG00000116819.6	1329
protein_coding_genes	chr1	gencode::PSMB2::ENSG00000126067.7	606
protein_coding_genes	chr1	gencode::C1orf216::ENSG00000142686.7	690
protein_coding_genes	chr1	gencode::CLSPN::ENSG00000092853.9	4110
protein_coding_genes	chr1	gencode::AGO4::ENSG00000134698.10	2586
protein_coding_genes	chr1	gencode::AGO1::ENSG00000092847.6	2574
protein_coding_genes	chr1	gencode::AGO3::ENSG00000126070.14	2615
protein_coding_genes	chr1	gencode::TEKT2::ENSG00000092850.7	1293
protein_coding_genes	chr1	gencode::ADPRHL2::ENSG00000116863.10	1092
protein_coding_genes	chr1	gencode::COL8A2::ENSG00000171812.6	2112
protein_coding_genes	chr1	gencode::TRAPPC3::ENSG00000054116.7	660
protein_coding_genes	chr1	gencode::MAP7D1::ENSG00000116871.11	2543
protein_coding_genes	chr1	gencode::THRAP3::ENSG00000054118.9	2868
protein_coding_genes	chr1	gencode::SH3D21::ENSG00000214193.5	2271
protein_coding_genes	chr1	gencode::EVA1B::ENSG00000142694.6	498
protein_coding_genes	chr1	gencode::RP11-268J15.5::ENSG00000116883.8	324
protein_coding_genes	chr1	gencode::STK40::ENSG00000196182.6	1488
protein_coding_genes	chr1	gencode::LSM10::ENSG00000181817.5	372
protein_coding_genes	chr1	gencode::OSCP1::ENSG00000116885.14	1326
protein_coding_genes	chr1	gencode::MRPS15::ENSG00000116898.7	774
protein_coding_genes	chr1	gencode::CSF3R::ENSG00000119535.13	2697
protein_coding_genes	chr1	gencode::GRIK3::ENSG00000163873.5	2814
protein_coding_genes	chr1	gencode::ZC3H12A::ENSG00000163874.8	1800
protein_coding_genes	chr1	gencode::MEAF6::ENSG00000163875.11	689
protein_coding_genes	chr1	gencode::SNIP1::ENSG00000163877.9	1191
protein_coding_genes	chr1	gencode::DNALI1::ENSG00000163879.9	843
protein_coding_genes	chr1	gencode::GNL2::ENSG00000134697.8	2196
protein_coding_genes	chr1	gencode::RSPO1::ENSG00000169218.9	805
protein_coding_genes	chr1	gencode::C1orf109::ENSG00000116922.10	612
protein_coding_genes	chr1	gencode::CDCA8::ENSG00000134690.6	843
protein_coding_genes	chr1	gencode::EPHA10::ENSG00000183317.12	3214
protein_coding_genes	chr1	gencode::MANEAL::ENSG00000185090.10	1374
protein_coding_genes	chr1	gencode::YRDC::ENSG00000196449.3	840
protein_coding_genes	chr1	gencode::C1orf122::ENSG00000197982.12	485
protein_coding_genes	chr1	gencode::MTF1::ENSG00000188786.9	2262
protein_coding_genes	chr1	gencode::AL929472.1::ENSG00000230610.1	45
protein_coding_genes	chr1	gencode::INPP5B::ENSG00000204084.8	3170
protein_coding_genes	chr1	gencode::SF3A3::ENSG00000183431.7	1506
protein_coding_genes	chr1	gencode::FHL3::ENSG00000183386.5	843
protein_coding_genes	chr1	gencode::UTP11L::ENSG00000183520.7	762
protein_coding_genes	chr1	gencode::POU3F1::ENSG00000185668.5	1356
protein_coding_genes	chr1	gencode::RRAGC::ENSG00000116954.7	1200
protein_coding_genes	chr1	gencode::MYCBP::ENSG00000214114.4	312
protein_coding_genes	chr1	gencode::GJA9::ENSG00000131233.8	1772
protein_coding_genes	chr1	gencode::RHBDL2::ENSG00000158315.6	1232
protein_coding_genes	chr1	gencode::AKIRIN1::ENSG00000174574.11	579
protein_coding_genes	chr1	gencode::NDUFS5::ENSG00000168653.6	321
protein_coding_genes	chr1	gencode::MACF1::ENSG00000127603.19	23056
protein_coding_genes	chr1	gencode::KIAA0754::ENSG00000255103.1	3876
protein_coding_genes	chr1	gencode::BMP8A::ENSG00000183682.7	1209
protein_coding_genes	chr1	gencode::PABPC4::ENSG00000090621.9	1983
protein_coding_genes	chr1	gencode::HEYL::ENSG00000163909.6	987
protein_coding_genes	chr1	gencode::NT5C1A::ENSG00000116981.3	1107
protein_coding_genes	chr1	gencode::HPCAL4::ENSG00000116983.8	576
protein_coding_genes	chr1	gencode::PPIE::ENSG00000084072.12	1068
protein_coding_genes	chr1	gencode::BMP8B::ENSG00000116985.6	1396
protein_coding_genes	chr1	gencode::OXCT2::ENSG00000198754.5	1554
protein_coding_genes	chr1	gencode::TRIT1::ENSG00000043514.11	1425
protein_coding_genes	chr1	gencode::MYCL::ENSG00000116990.9	1310
protein_coding_genes	chr1	gencode::MFSD2A::ENSG00000168389.13	1632
protein_coding_genes	chr1	gencode::CAP1::ENSG00000131236.12	1428
protein_coding_genes	chr1	gencode::PPT1::ENSG00000131238.12	921
protein_coding_genes	chr1	gencode::RLF::ENSG00000117000.8	5745
protein_coding_genes	chr1	gencode::TMCO2::ENSG00000188800.5	549
protein_coding_genes	chr1	gencode::ZMPSTE24::ENSG00000084073.4	1428
protein_coding_genes	chr1	gencode::COL9A2::ENSG00000049089.9	2070
protein_coding_genes	chr1	gencode::SMAP2::ENSG00000084070.7	1050
protein_coding_genes	chr1	gencode::ZFP69B::ENSG00000187801.10	1605
protein_coding_genes	chr1	gencode::ZFP69::ENSG00000187815.5	1581
protein_coding_genes	chr1	gencode::EXO5::ENSG00000164002.7	1122
protein_coding_genes	chr1	gencode::ZNF684::ENSG00000117010.11	1259
protein_coding_genes	chr1	gencode::RIMS3::ENSG00000117016.5	927
protein_coding_genes	chr1	gencode::NFYC::ENSG00000066136.15	1377
protein_coding_genes	chr1	gencode::KCNQ4::ENSG00000117013.10	2088
protein_coding_genes	chr1	gencode::CITED4::ENSG00000179862.5	555
protein_coding_genes	chr1	gencode::CTPS1::ENSG00000171793.9	1849
protein_coding_genes	chr1	gencode::SLFNL1::ENSG00000171790.11	1224
protein_coding_genes	chr1	gencode::SCMH1::ENSG00000010803.12	2095
protein_coding_genes	chr1	gencode::FOXO6::ENSG00000204060.4	1680
protein_coding_genes	chr1	gencode::EDN2::ENSG00000127129.5	537
protein_coding_genes	chr1	gencode::HIVEP3::ENSG00000127124.9	7221
protein_coding_genes	chr1	gencode::GUCA2B::ENSG00000044012.3	339
protein_coding_genes	chr1	gencode::GUCA2A::ENSG00000197273.3	348
protein_coding_genes	chr1	gencode::FOXJ3::ENSG00000198815.4	1869
protein_coding_genes	chr1	gencode::RIMKLA::ENSG00000177181.10	1176
protein_coding_genes	chr1	gencode::ZMYND12::ENSG00000066185.8	1098
protein_coding_genes	chr1	gencode::PPCS::ENSG00000127125.7	966
protein_coding_genes	chr1	gencode::CCDC30::ENSG00000186409.10	2436
protein_coding_genes	chr1	gencode::PPIH::ENSG00000171960.6	653
protein_coding_genes	chr1	gencode::YBX1::ENSG00000065978.13	975
protein_coding_genes	chr1	gencode::CLDN19::ENSG00000164007.6	791
protein_coding_genes	chr1	gencode::LEPRE1::ENSG00000117385.11	2571
protein_coding_genes	chr1	gencode::C1orf50::ENSG00000164008.9	1287
protein_coding_genes	chr1	gencode::CCDC23::ENSG00000177868.7	201
protein_coding_genes	chr1	gencode::ERMAP::ENSG00000164010.9	1428
protein_coding_genes	chr1	gencode::ZNF691::ENSG00000164011.13	1005
protein_coding_genes	chr1	gencode::SLC2A1::ENSG00000117394.15	1680
protein_coding_genes	chr1	gencode::FAM183A::ENSG00000186973.6	454
protein_coding_genes	chr1	gencode::EBNA1BP2::ENSG00000117395.6	1086
protein_coding_genes	chr1	gencode::WDR65::ENSG00000243710.3	3921
protein_coding_genes	chr1	gencode::TMEM125::ENSG00000179178.6	660
protein_coding_genes	chr1	gencode::C1orf210::ENSG00000253313.1	342
protein_coding_genes	chr1	gencode::TIE1::ENSG00000066056.9	3515
protein_coding_genes	chr1	gencode::MPL::ENSG00000117400.10	1993
protein_coding_genes	chr1	gencode::CDC20::ENSG00000117399.9	1500
protein_coding_genes	chr1	gencode::ELOVL1::ENSG00000066322.8	840
protein_coding_genes	chr1	gencode::MED8::ENSG00000159479.12	910
protein_coding_genes	chr1	gencode::SZT2::ENSG00000198198.9	10173
protein_coding_genes	chr1	gencode::HYI::ENSG00000178922.12	1007
protein_coding_genes	chr1	gencode::PTPRF::ENSG00000142949.12	5757
protein_coding_genes	chr1	gencode::KDM4A::ENSG00000066135.8	3195
protein_coding_genes	chr1	gencode::ST3GAL3::ENSG00000126091.15	1339
protein_coding_genes	chr1	gencode::ARTN::ENSG00000117407.12	782
protein_coding_genes	chr1	gencode::IPO13::ENSG00000117408.6	2943
protein_coding_genes	chr1	gencode::DPH2::ENSG00000132768.9	1470
protein_coding_genes	chr1	gencode::ATP6V0B::ENSG00000117410.9	1003
protein_coding_genes	chr1	gencode::B4GALT2::ENSG00000117411.12	1206
protein_coding_genes	chr1	gencode::SLC6A9::ENSG00000196517.7	2623
protein_coding_genes	chr1	gencode::CCDC24::ENSG00000159214.8	924
protein_coding_genes	chr1	gencode::KLF17::ENSG00000171872.4	1170
protein_coding_genes	chr1	gencode::DMAP1::ENSG00000178028.9	1404
protein_coding_genes	chr1	gencode::ERI3::ENSG00000117419.10	1158
protein_coding_genes	chr1	gencode::RNF220::ENSG00000187147.13	1779
protein_coding_genes	chr1	gencode::TMEM53::ENSG00000126106.9	1010
protein_coding_genes	chr1	gencode::C1orf228::ENSG00000198520.6	1323
protein_coding_genes	chr1	gencode::KIF2C::ENSG00000142945.8	2181
protein_coding_genes	chr1	gencode::RPS8::ENSG00000142937.7	627
protein_coding_genes	chr1	gencode::BEST4::ENSG00000142959.4	1422
protein_coding_genes	chr1	gencode::PLK3::ENSG00000173846.8	1941
protein_coding_genes	chr1	gencode::TCTEX1D4::ENSG00000188396.2	666
protein_coding_genes	chr1	gencode::BTBD19::ENSG00000222009.4	941
protein_coding_genes	chr1	gencode::PTCH2::ENSG00000117425.9	3628
protein_coding_genes	chr1	gencode::EIF2B3::ENSG00000070785.12	1396
protein_coding_genes	chr1	gencode::HECTD3::ENSG00000126107.10	2654
protein_coding_genes	chr1	gencode::UROD::ENSG00000126088.8	1104
protein_coding_genes	chr1	gencode::ZSWIM5::ENSG00000162415.6	3558
protein_coding_genes	chr1	gencode::HPDL::ENSG00000186603.4	1116
protein_coding_genes	chr1	gencode::MUTYH::ENSG00000132781.13	1650
protein_coding_genes	chr1	gencode::TOE1::ENSG00000132773.7	1533
protein_coding_genes	chr1	gencode::TESK2::ENSG00000070759.12	1753
protein_coding_genes	chr1	gencode::CCDC163P::ENSG00000236624.4	630
protein_coding_genes	chr1	gencode::MMACHC::ENSG00000132763.10	849
protein_coding_genes	chr1	gencode::PRDX1::ENSG00000117450.9	600
protein_coding_genes	chr1	gencode::AKR1A1::ENSG00000117448.9	982
protein_coding_genes	chr1	gencode::NASP::ENSG00000132780.12	2440
protein_coding_genes	chr1	gencode::CCDC17::ENSG00000159588.10	1869
protein_coding_genes	chr1	gencode::GPBP1L1::ENSG00000159592.6	1425
protein_coding_genes	chr1	gencode::TMEM69::ENSG00000159596.6	744
protein_coding_genes	chr1	gencode::IPP::ENSG00000197429.6	1755
protein_coding_genes	chr1	gencode::MAST2::ENSG00000086015.16	5397
protein_coding_genes	chr1	gencode::PIK3R3::ENSG00000117461.10	1635
protein_coding_genes	chr1	gencode::TSPAN1::ENSG00000117472.5	726
protein_coding_genes	chr1	gencode::POMGNT1::ENSG00000085998.9	2327
protein_coding_genes	chr1	gencode::LURAP1::ENSG00000171357.5	720
protein_coding_genes	chr1	gencode::RAD54L::ENSG00000085999.7	2244
protein_coding_genes	chr1	gencode::LRRC41::ENSG00000132128.12	2439
protein_coding_genes	chr1	gencode::UQCRH::ENSG00000173660.7	276
protein_coding_genes	chr1	gencode::NSUN4::ENSG00000117481.6	1155
protein_coding_genes	chr1	gencode::FAAH::ENSG00000117480.11	1740
protein_coding_genes	chr1	gencode::DMBX1::ENSG00000197587.6	1149
protein_coding_genes	chr1	gencode::KNCN::ENSG00000162456.5	375
protein_coding_genes	chr1	gencode::MKNK1::ENSG00000079277.15	1454
protein_coding_genes	chr1	gencode::MOB3C::ENSG00000142961.10	826
protein_coding_genes	chr1	gencode::ATPAF1::ENSG00000123472.8	1058
protein_coding_genes	chr1	gencode::EFCAB14::ENSG00000159658.6	1625
protein_coding_genes	chr1	gencode::TEX38::ENSG00000186118.7	783
protein_coding_genes	chr1	gencode::CYP4B1::ENSG00000142973.8	1539
protein_coding_genes	chr1	gencode::CYP4A11::ENSG00000187048.8	1619
protein_coding_genes	chr1	gencode::CYP4X1::ENSG00000186377.6	1704
protein_coding_genes	chr1	gencode::CYP4Z1::ENSG00000186160.4	1518
protein_coding_genes	chr1	gencode::CYP4A22::ENSG00000162365.7	1616
protein_coding_genes	chr1	gencode::PDZK1IP1::ENSG00000162366.3	345
protein_coding_genes	chr1	gencode::TAL1::ENSG00000162367.7	1002
protein_coding_genes	chr1	gencode::STIL::ENSG00000123473.11	3867
protein_coding_genes	chr1	gencode::CMPK1::ENSG00000162368.9	693
protein_coding_genes	chr1	gencode::FOXE3::ENSG00000186790.4	960
protein_coding_genes	chr1	gencode::FOXD2::ENSG00000186564.5	1488
protein_coding_genes	chr1	gencode::FLJ00388::ENSG00000273395.1	312
protein_coding_genes	chr1	gencode::TRABD2B::ENSG00000269113.3	1554
protein_coding_genes	chr1	gencode::AL109659.1::ENSG00000269709.1	573
protein_coding_genes	chr1	gencode::SLC5A9::ENSG00000117834.8	2121
protein_coding_genes	chr1	gencode::SPATA6::ENSG00000132122.7	1467
protein_coding_genes	chr1	gencode::AGBL4::ENSG00000186094.12	1544
protein_coding_genes	chr1	gencode::BEND5::ENSG00000162373.8	1266
protein_coding_genes	chr1	gencode::AL645730.2::ENSG00000227839.1	324
protein_coding_genes	chr1	gencode::ELAVL4::ENSG00000162374.12	1254
protein_coding_genes	chr1	gencode::DMRTA2::ENSG00000142700.7	1629
protein_coding_genes	chr1	gencode::FAF1::ENSG00000185104.15	1971
protein_coding_genes	chr1	gencode::CDKN2C::ENSG00000123080.6	507
protein_coding_genes	chr1	gencode::C1orf185::ENSG00000204006.4	600
protein_coding_genes	chr1	gencode::RNF11::ENSG00000123091.4	465
protein_coding_genes	chr1	gencode::TTC39A::ENSG00000085831.11	2275
protein_coding_genes	chr1	gencode::EPS15::ENSG00000085832.12	2762
protein_coding_genes	chr1	gencode::OSBPL9::ENSG00000117859.14	2398
protein_coding_genes	chr1	gencode::NRD1::ENSG00000078618.15	3696
protein_coding_genes	chr1	gencode::RAB3B::ENSG00000169213.6	660
protein_coding_genes	chr1	gencode::TXNDC12::ENSG00000117862.7	529
protein_coding_genes	chr1	gencode::KTI12::ENSG00000198841.3	1065
protein_coding_genes	chr1	gencode::BTF3L4::ENSG00000134717.13	485
protein_coding_genes	chr1	gencode::ZFYVE9::ENSG00000157077.10	4278
protein_coding_genes	chr1	gencode::CC2D1B::ENSG00000154222.10	2649
protein_coding_genes	chr1	gencode::ORC1::ENSG00000085840.8	2586
protein_coding_genes	chr1	gencode::PRPF38A::ENSG00000134748.12	939
protein_coding_genes	chr1	gencode::ZCCHC11::ENSG00000134744.9	4986
protein_coding_genes	chr1	gencode::GPX7::ENSG00000116157.5	564
protein_coding_genes	chr1	gencode::FAM159A::ENSG00000182183.10	573
protein_coding_genes	chr1	gencode::SELRC1::ENSG00000162377.4	696
protein_coding_genes	chr1	gencode::ZYG11B::ENSG00000162378.8	2241
protein_coding_genes	chr1	gencode::ZYG11A::ENSG00000203995.5	2280
protein_coding_genes	chr1	gencode::ECHDC2::ENSG00000121310.12	944
protein_coding_genes	chr1	gencode::SCP2::ENSG00000116171.12	1664
protein_coding_genes	chr1	gencode::PODN::ENSG00000174348.9	2018
protein_coding_genes	chr1	gencode::SLC1A7::ENSG00000162383.7	1729
protein_coding_genes	chr1	gencode::CPT2::ENSG00000157184.5	1977
protein_coding_genes	chr1	gencode::C1orf123::ENSG00000162384.9	483
protein_coding_genes	chr1	gencode::MAGOH::ENSG00000162385.6	441
protein_coding_genes	chr1	gencode::LRP8::ENSG00000157193.10	2892
protein_coding_genes	chr1	gencode::DMRTB1::ENSG00000143006.7	1029
protein_coding_genes	chr1	gencode::GLIS1::ENSG00000174332.3	1863
protein_coding_genes	chr1	gencode::NDC1::ENSG00000058804.10	2025
protein_coding_genes	chr1	gencode::YIPF1::ENSG00000058799.9	996
protein_coding_genes	chr1	gencode::DIO1::ENSG00000211452.6	750
protein_coding_genes	chr1	gencode::HSPB11::ENSG00000081870.7	803
protein_coding_genes	chr1	gencode::LRRC42::ENSG00000116212.10	1287
protein_coding_genes	chr1	gencode::LDLRAD1::ENSG00000203985.6	682
protein_coding_genes	chr1	gencode::TMEM59::ENSG00000116209.7	1020
protein_coding_genes	chr1	gencode::TCEANC2::ENSG00000116205.6	717
protein_coding_genes	chr1	gencode::AL161915.1::ENSG00000212670.1	393
protein_coding_genes	chr1	gencode::CDCP2::ENSG00000157211.10	1350
protein_coding_genes	chr1	gencode::AL357673.1::ENSG00000248835.2	381
protein_coding_genes	chr1	gencode::CYB5RL::ENSG00000215883.5	1018
protein_coding_genes	chr1	gencode::MRPL37::ENSG00000116221.11	1530
protein_coding_genes	chr1	gencode::SSBP3::ENSG00000157216.11	1167
protein_coding_genes	chr1	gencode::SSBP3-AS1::ENSG00000198711.4	303
protein_coding_genes	chr1	gencode::ACOT11::ENSG00000162390.13	1980
protein_coding_genes	chr1	gencode::FAM151A::ENSG00000162391.7	1758
protein_coding_genes	chr1	gencode::MROH7::ENSG00000184313.15	4150
protein_coding_genes	chr1	gencode::TTC4::ENSG00000243725.2	1164
protein_coding_genes	chr1	gencode::PARS2::ENSG00000162396.5	1428
protein_coding_genes	chr1	gencode::TTC22::ENSG00000006555.6	1809
protein_coding_genes	chr1	gencode::C1orf177::ENSG00000162398.7	1318
protein_coding_genes	chr1	gencode::DHCR24::ENSG00000116133.7	1659
protein_coding_genes	chr1	gencode::TMEM61::ENSG00000143001.4	633
protein_coding_genes	chr1	gencode::BSND::ENSG00000162399.6	963
protein_coding_genes	chr1	gencode::PCSK9::ENSG00000169174.9	2174
protein_coding_genes	chr1	gencode::USP24::ENSG00000162402.8	7863
protein_coding_genes	chr1	gencode::PPAP2B::ENSG00000162407.8	936
protein_coding_genes	chr1	gencode::PRKAA2::ENSG00000162409.6	1659
protein_coding_genes	chr1	gencode::C1orf168::ENSG00000187889.8	2187
protein_coding_genes	chr1	gencode::C8A::ENSG00000157131.10	1755
protein_coding_genes	chr1	gencode::C8B::ENSG00000021852.8	1839
protein_coding_genes	chr1	gencode::DAB1::ENSG00000173406.11	1812
protein_coding_genes	chr1	gencode::OMA1::ENSG00000162600.7	1671
protein_coding_genes	chr1	gencode::TACSTD2::ENSG00000184292.5	972
protein_coding_genes	chr1	gencode::MYSM1::ENSG00000162601.5	2487
protein_coding_genes	chr1	gencode::JUN::ENSG00000177606.5	996
protein_coding_genes	chr1	gencode::FGGY::ENSG00000172456.12	1728
protein_coding_genes	chr1	gencode::HOOK1::ENSG00000134709.6	2187
protein_coding_genes	chr1	gencode::CYP2J2::ENSG00000134716.5	1509
protein_coding_genes	chr1	gencode::C1orf87::ENSG00000162598.9	1735
protein_coding_genes	chr1	gencode::NFIA::ENSG00000162599.11	1842
protein_coding_genes	chr1	gencode::TM2D1::ENSG00000162604.8	934
protein_coding_genes	chr1	gencode::INADL::ENSG00000132849.14	5549
protein_coding_genes	chr1	gencode::L1TD1::ENSG00000240563.1	2598
protein_coding_genes	chr1	gencode::KANK4::ENSG00000132854.14	2988
protein_coding_genes	chr1	gencode::USP1::ENSG00000162607.8	2358
protein_coding_genes	chr1	gencode::DOCK7::ENSG00000116641.11	6531
protein_coding_genes	chr1	gencode::ANGPTL3::ENSG00000132855.4	1383
protein_coding_genes	chr1	gencode::AL138847.1::ENSG00000269624.1	369
protein_coding_genes	chr1	gencode::ATG4C::ENSG00000125703.10	1377
protein_coding_genes	chr1	gencode::FOXD3::ENSG00000187140.4	1437
protein_coding_genes	chr1	gencode::ALG6::ENSG00000088035.11	1530
protein_coding_genes	chr1	gencode::ITGB3BP::ENSG00000142856.12	680
protein_coding_genes	chr1	gencode::EFCAB7::ENSG00000203965.8	1890
protein_coding_genes	chr1	gencode::DLEU2L::ENSG00000116652.5	168
protein_coding_genes	chr1	gencode::PGM1::ENSG00000079739.11	1989
protein_coding_genes	chr1	gencode::ROR1::ENSG00000185483.7	2822
protein_coding_genes	chr1	gencode::UBE2U::ENSG00000177414.9	681
protein_coding_genes	chr1	gencode::CACHD1::ENSG00000158966.9	3825
protein_coding_genes	chr1	gencode::RAVER2::ENSG00000162437.10	2076
protein_coding_genes	chr1	gencode::JAK1::ENSG00000162434.7	3465
protein_coding_genes	chr1	gencode::AK4::ENSG00000162433.10	672
protein_coding_genes	chr1	gencode::DNAJC6::ENSG00000116675.11	2935
protein_coding_genes	chr1	gencode::LEPROT::ENSG00000213625.4	396
protein_coding_genes	chr1	gencode::LEPR::ENSG00000116678.14	3768
protein_coding_genes	chr1	gencode::PDE4B::ENSG00000184588.13	2613
protein_coding_genes	chr1	gencode::SGIP1::ENSG00000118473.17	2803
protein_coding_genes	chr1	gencode::AL139147.1::ENSG00000248458.2	546
protein_coding_genes	chr1	gencode::TCTEX1D1::ENSG00000152760.5	540
protein_coding_genes	chr1	gencode::INSL5::ENSG00000172410.4	408
protein_coding_genes	chr1	gencode::WDR78::ENSG00000152763.12	2648
protein_coding_genes	chr1	gencode::MIER1::ENSG00000198160.10	1853
protein_coding_genes	chr1	gencode::SLC35D1::ENSG00000116704.6	1129
protein_coding_genes	chr1	gencode::C1orf141::ENSG00000203963.7	1203
protein_coding_genes	chr1	gencode::IL23R::ENSG00000162594.10	1923
protein_coding_genes	chr1	gencode::IL12RB2::ENSG00000081985.6	2589
protein_coding_genes	chr1	gencode::SERBP1::ENSG00000142864.10	1227
protein_coding_genes	chr1	gencode::GADD45A::ENSG00000116717.7	498
protein_coding_genes	chr1	gencode::GNG12::ENSG00000172380.5	219
protein_coding_genes	chr1	gencode::DIRAS3::ENSG00000162595.4	690
protein_coding_genes	chr1	gencode::WLS::ENSG00000116729.9	1753
protein_coding_genes	chr1	gencode::RPE65::ENSG00000116745.6	1602
protein_coding_genes	chr1	gencode::DEPDC1::ENSG00000024526.12	2436
protein_coding_genes	chr1	gencode::LRRC7::ENSG00000033122.14	4736
protein_coding_genes	chr1	gencode::LRRC40::ENSG00000066557.5	1809
protein_coding_genes	chr1	gencode::SRSF11::ENSG00000116754.9	1721
protein_coding_genes	chr1	gencode::ANKRD13C::ENSG00000118454.8	1626
protein_coding_genes	chr1	gencode::HHLA3::ENSG00000197568.9	465
protein_coding_genes	chr1	gencode::CTH::ENSG00000116761.7	1218
protein_coding_genes	chr1	gencode::PTGER3::ENSG00000050628.16	1650
protein_coding_genes	chr1	gencode::ZRANB2::ENSG00000132485.8	1027
protein_coding_genes	chr1	gencode::NEGR1::ENSG00000172260.9	1065
protein_coding_genes	chr1	gencode::LRRIQ3::ENSG00000162620.11	1935
protein_coding_genes	chr1	gencode::FPGT::ENSG00000254685.2	1904
protein_coding_genes	chr1	gencode::FPGT-TNNI3K::ENSG00000259030.2	2981
protein_coding_genes	chr1	gencode::TNNI3K::ENSG00000116783.10	2851
protein_coding_genes	chr1	gencode::LRRC53::ENSG00000162621.5	3744
protein_coding_genes	chr1	gencode::C1orf173::ENSG00000178965.9	4622
protein_coding_genes	chr1	gencode::CRYZ::ENSG00000116791.9	990
protein_coding_genes	chr1	gencode::TYW3::ENSG00000162623.11	780
protein_coding_genes	chr1	gencode::LHX8::ENSG00000162624.10	1071
protein_coding_genes	chr1	gencode::SLC44A5::ENSG00000137968.12	2267
protein_coding_genes	chr1	gencode::ACADM::ENSG00000117054.9	1377
protein_coding_genes	chr1	gencode::RABGGTB::ENSG00000137955.11	1040
protein_coding_genes	chr1	gencode::MSH4::ENSG00000057468.6	2811
protein_coding_genes	chr1	gencode::ASB17::ENSG00000154007.6	888
protein_coding_genes	chr1	gencode::ST6GALNAC3::ENSG00000184005.9	918
protein_coding_genes	chr1	gencode::ST6GALNAC5::ENSG00000117069.10	1011
protein_coding_genes	chr1	gencode::PIGK::ENSG00000142892.10	1201
protein_coding_genes	chr1	gencode::AK5::ENSG00000154027.14	1689
protein_coding_genes	chr1	gencode::ZZZ3::ENSG00000036549.8	2735
protein_coding_genes	chr1	gencode::USP33::ENSG00000077254.10	2841
protein_coding_genes	chr1	gencode::FAM73A::ENSG00000180488.10	1902
protein_coding_genes	chr1	gencode::NEXN::ENSG00000162614.14	2075
protein_coding_genes	chr1	gencode::FUBP1::ENSG00000162613.12	2040
protein_coding_genes	chr1	gencode::DNAJB4::ENSG00000162616.8	1014
protein_coding_genes	chr1	gencode::GIPC2::ENSG00000137960.5	948
protein_coding_genes	chr1	gencode::PTGFR::ENSG00000122420.5	1151
protein_coding_genes	chr1	gencode::IFI44L::ENSG00000137959.11	1359
protein_coding_genes	chr1	gencode::IFI44::ENSG00000137965.6	1461
protein_coding_genes	chr1	gencode::ELTD1::ENSG00000162618.8	2073
protein_coding_genes	chr1	gencode::LPHN2::ENSG00000117114.15	4514
protein_coding_genes	chr1	gencode::TTLL7::ENSG00000137941.12	2664
protein_coding_genes	chr1	gencode::PRKACB::ENSG00000142875.15	1329
protein_coding_genes	chr1	gencode::SAMD13::ENSG00000203943.4	514
protein_coding_genes	chr1	gencode::DNASE2B::ENSG00000137976.7	1086
protein_coding_genes	chr1	gencode::RPF1::ENSG00000117133.6	1074
protein_coding_genes	chr1	gencode::GNG5::ENSG00000174021.6	207
protein_coding_genes	chr1	gencode::CTBS::ENSG00000117151.8	1158
protein_coding_genes	chr1	gencode::C1orf180::ENSG00000180869.3	372
protein_coding_genes	chr1	gencode::SSX2IP::ENSG00000117155.12	1895
protein_coding_genes	chr1	gencode::LPAR3::ENSG00000171517.5	1062
protein_coding_genes	chr1	gencode::MCOLN2::ENSG00000153898.8	1701
protein_coding_genes	chr1	gencode::MCOLN3::ENSG00000055732.8	1683
protein_coding_genes	chr1	gencode::WDR63::ENSG00000162643.8	2676
protein_coding_genes	chr1	gencode::SYDE2::ENSG00000097096.8	3585
protein_coding_genes	chr1	gencode::C1orf52::ENSG00000162642.9	578
protein_coding_genes	chr1	gencode::BCL10::ENSG00000142867.8	702
protein_coding_genes	chr1	gencode::DDAH1::ENSG00000153904.14	885
protein_coding_genes	chr1	gencode::CYR61::ENSG00000142871.11	1146
protein_coding_genes	chr1	gencode::ZNHIT6::ENSG00000117174.6	1413
protein_coding_genes	chr1	gencode::COL24A1::ENSG00000171502.10	5145
protein_coding_genes	chr1	gencode::ODF2L::ENSG00000122417.11	2149
protein_coding_genes	chr1	gencode::CLCA2::ENSG00000137975.7	2832
protein_coding_genes	chr1	gencode::CLCA1::ENSG00000016490.11	2745
protein_coding_genes	chr1	gencode::CLCA4::ENSG00000016602.8	2868
protein_coding_genes	chr1	gencode::SH3GLB1::ENSG00000097033.10	1161
protein_coding_genes	chr1	gencode::SEP15::ENSG00000183291.11	530
protein_coding_genes	chr1	gencode::HS2ST1::ENSG00000153936.12	1324
protein_coding_genes	chr1	gencode::RP5-1052I5.2::ENSG00000267561.1	912
protein_coding_genes	chr1	gencode::LMO4::ENSG00000143013.8	498
protein_coding_genes	chr1	gencode::PKN2::ENSG00000065243.14	3101
protein_coding_genes	chr1	gencode::GTF2B::ENSG00000137947.7	951
protein_coding_genes	chr1	gencode::CCBL2::ENSG00000137944.12	1416
protein_coding_genes	chr1	gencode::RBMXL1::ENSG00000213516.5	1173
protein_coding_genes	chr1	gencode::GBP3::ENSG00000117226.7	1788
protein_coding_genes	chr1	gencode::GBP1::ENSG00000117228.9	1779
protein_coding_genes	chr1	gencode::GBP2::ENSG00000162645.8	1776
protein_coding_genes	chr1	gencode::GBP7::ENSG00000213512.1	1917
protein_coding_genes	chr1	gencode::GBP4::ENSG00000162654.8	1923
protein_coding_genes	chr1	gencode::GBP5::ENSG00000154451.10	1761
protein_coding_genes	chr1	gencode::GBP6::ENSG00000183347.13	1902
protein_coding_genes	chr1	gencode::LRRC8B::ENSG00000197147.8	2412
protein_coding_genes	chr1	gencode::LRRC8C::ENSG00000171488.10	2412
protein_coding_genes	chr1	gencode::LRRC8D::ENSG00000171492.10	2577
protein_coding_genes	chr1	gencode::ZNF326::ENSG00000162664.12	1753
protein_coding_genes	chr1	gencode::BARHL2::ENSG00000143032.7	1164
protein_coding_genes	chr1	gencode::ZNF644::ENSG00000122482.16	3984
protein_coding_genes	chr1	gencode::HFM1::ENSG00000162669.11	4308
protein_coding_genes	chr1	gencode::CDC7::ENSG00000097046.8	1725
protein_coding_genes	chr1	gencode::TGFBR3::ENSG00000069702.6	2556
protein_coding_genes	chr1	gencode::BRDT::ENSG00000137948.14	2844
protein_coding_genes	chr1	gencode::EPHX4::ENSG00000172031.6	1089
protein_coding_genes	chr1	gencode::BTBD8::ENSG00000189195.5	1222
protein_coding_genes	chr1	gencode::KIAA1107::ENSG00000069712.9	4230
protein_coding_genes	chr1	gencode::C1orf146::ENSG00000203910.4	543
protein_coding_genes	chr1	gencode::GLMN::ENSG00000174842.12	1785
protein_coding_genes	chr1	gencode::RPAP2::ENSG00000122484.8	1839
protein_coding_genes	chr1	gencode::GFI1::ENSG00000162676.7	1269
protein_coding_genes	chr1	gencode::EVI5::ENSG00000067208.10	2466
protein_coding_genes	chr1	gencode::RPL5::ENSG00000122406.8	894
protein_coding_genes	chr1	gencode::FAM69A::ENSG00000154511.7	1287
protein_coding_genes	chr1	gencode::MTF2::ENSG00000143033.13	1782
protein_coding_genes	chr1	gencode::TMED5::ENSG00000117500.8	757
protein_coding_genes	chr1	gencode::CCDC18::ENSG00000122483.13	4722
protein_coding_genes	chr1	gencode::DR1::ENSG00000117505.8	531
protein_coding_genes	chr1	gencode::FNBP1L::ENSG00000137942.12	1838
protein_coding_genes	chr1	gencode::BCAR3::ENSG00000137936.12	2562
protein_coding_genes	chr1	gencode::DNTTIP2::ENSG00000067334.9	2271
protein_coding_genes	chr1	gencode::GCLM::ENSG00000023909.5	825
protein_coding_genes	chr1	gencode::ABCA4::ENSG00000198691.7	7072
protein_coding_genes	chr1	gencode::ARHGAP29::ENSG00000137962.8	3825
protein_coding_genes	chr1	gencode::ABCD3::ENSG00000117528.7	2079
protein_coding_genes	chr1	gencode::F3::ENSG00000117525.9	888
protein_coding_genes	chr1	gencode::SLC44A3::ENSG00000143036.12	1962
protein_coding_genes	chr1	gencode::CNN3::ENSG00000117519.11	990
protein_coding_genes	chr1	gencode::ALG14::ENSG00000172339.9	651
protein_coding_genes	chr1	gencode::RP11-57H12.6::ENSG00000271092.1	606
protein_coding_genes	chr1	gencode::TMEM56::ENSG00000152078.5	792
protein_coding_genes	chr1	gencode::RWDD3::ENSG00000122481.12	859
protein_coding_genes	chr1	gencode::RP11-147C23.1::ENSG00000237435.4	315
protein_coding_genes	chr1	gencode::PTBP2::ENSG00000117569.14	1686
protein_coding_genes	chr1	gencode::DPYD::ENSG00000188641.8	3216
protein_coding_genes	chr1	gencode::SNX7::ENSG00000162627.12	1356
protein_coding_genes	chr1	gencode::LPPR5::ENSG00000117598.7	966
protein_coding_genes	chr1	gencode::LPPR4::ENSG00000117600.8	2356
protein_coding_genes	chr1	gencode::PALMD::ENSG00000099260.6	1700
protein_coding_genes	chr1	gencode::FRRS1::ENSG00000156869.8	1909
protein_coding_genes	chr1	gencode::AGL::ENSG00000162688.11	4664
protein_coding_genes	chr1	gencode::SLC35A3::ENSG00000117620.8	1104
protein_coding_genes	chr1	gencode::HIAT1::ENSG00000156875.9	1473
protein_coding_genes	chr1	gencode::SASS6::ENSG00000156876.8	1974
protein_coding_genes	chr1	gencode::TRMT13::ENSG00000122435.5	1473
protein_coding_genes	chr1	gencode::LRRC39::ENSG00000122477.8	1076
protein_coding_genes	chr1	gencode::DBT::ENSG00000137992.10	1473
protein_coding_genes	chr1	gencode::RTCA::ENSG00000137996.8	1144
protein_coding_genes	chr1	gencode::CDC14A::ENSG00000079335.13	1995
protein_coding_genes	chr1	gencode::GPR88::ENSG00000181656.6	1155
protein_coding_genes	chr1	gencode::VCAM1::ENSG00000162692.6	2220
protein_coding_genes	chr1	gencode::EXTL2::ENSG00000162694.9	993
protein_coding_genes	chr1	gencode::SLC30A7::ENSG00000162695.7	1131
protein_coding_genes	chr1	gencode::DPH5::ENSG00000117543.15	858
protein_coding_genes	chr1	gencode::AC093157.1::ENSG00000269175.1	372
protein_coding_genes	chr1	gencode::S1PR1::ENSG00000170989.8	1149
protein_coding_genes	chr1	gencode::OLFM3::ENSG00000118733.12	1562
protein_coding_genes	chr1	gencode::COL11A1::ENSG00000060718.14	5574
protein_coding_genes	chr1	gencode::RNPC3::ENSG00000185946.11	1554
protein_coding_genes	chr1	gencode::AMY2B::ENSG00000240038.2	1536
protein_coding_genes	chr1	gencode::AMY2A::ENSG00000243480.3	1536
protein_coding_genes	chr1	gencode::AMY1A::ENSG00000237763.5	1536
protein_coding_genes	chr1	gencode::AMY1B::ENSG00000174876.12	1536
protein_coding_genes	chr1	gencode::AMY1C::ENSG00000187733.6	1536
protein_coding_genes	chr1	gencode::PRMT6::ENSG00000198890.6	1128
protein_coding_genes	chr1	gencode::NTNG1::ENSG00000162631.14	1773
protein_coding_genes	chr1	gencode::VAV3::ENSG00000134215.11	2742
protein_coding_genes	chr1	gencode::SLC25A24::ENSG00000085491.11	1587
protein_coding_genes	chr1	gencode::NBPF4::ENSG00000196427.9	1917
protein_coding_genes	chr1	gencode::NBPF6::ENSG00000186086.12	2011
protein_coding_genes	chr1	gencode::FAM102B::ENSG00000162636.11	1111
protein_coding_genes	chr1	gencode::HENMT1::ENSG00000162639.11	1275
protein_coding_genes	chr1	gencode::PRPF38B::ENSG00000134186.7	1656
protein_coding_genes	chr1	gencode::FNDC7::ENSG00000143107.4	2268
protein_coding_genes	chr1	gencode::STXBP3::ENSG00000116266.6	1779
protein_coding_genes	chr1	gencode::AKNAD1::ENSG00000162641.14	2788
protein_coding_genes	chr1	gencode::GPSM2::ENSG00000121957.8	2055
protein_coding_genes	chr1	gencode::CLCC1::ENSG00000121940.11	1786
protein_coding_genes	chr1	gencode::WDR47::ENSG00000085433.11	2788
protein_coding_genes	chr1	gencode::TAF13::ENSG00000197780.5	375
protein_coding_genes	chr1	gencode::TMEM167B::ENSG00000215717.5	225
protein_coding_genes	chr1	gencode::C1orf194::ENSG00000179902.8	555
protein_coding_genes	chr1	gencode::KIAA1324::ENSG00000116299.12	3042
protein_coding_genes	chr1	gencode::SARS::ENSG00000031698.8	1611
protein_coding_genes	chr1	gencode::CELSR2::ENSG00000143126.7	8772
protein_coding_genes	chr1	gencode::PSRC1::ENSG00000134222.12	1124
protein_coding_genes	chr1	gencode::MYBPHL::ENSG00000221986.2	1065
protein_coding_genes	chr1	gencode::SORT1::ENSG00000134243.7	2496
protein_coding_genes	chr1	gencode::PSMA5::ENSG00000143106.8	726
protein_coding_genes	chr1	gencode::SYPL2::ENSG00000143028.7	819
protein_coding_genes	chr1	gencode::ATXN7L2::ENSG00000162650.11	2169
protein_coding_genes	chr1	gencode::CYB561D1::ENSG00000174151.10	881
protein_coding_genes	chr1	gencode::AMIGO1::ENSG00000181754.6	1482
protein_coding_genes	chr1	gencode::GPR61::ENSG00000156097.8	1356
protein_coding_genes	chr1	gencode::GNAI3::ENSG00000065135.7	1065
protein_coding_genes	chr1	gencode::GNAT2::ENSG00000134183.7	1065
protein_coding_genes	chr1	gencode::AMPD2::ENSG00000116337.11	2677
protein_coding_genes	chr1	gencode::GSTM4::ENSG00000168765.11	897
protein_coding_genes	chr1	gencode::GSTM2::ENSG00000213366.8	777
protein_coding_genes	chr1	gencode::GSTM1::ENSG00000134184.8	714
protein_coding_genes	chr1	gencode::GSTM5::ENSG00000134201.6	879
protein_coding_genes	chr1	gencode::GSTM3::ENSG00000134202.6	678
protein_coding_genes	chr1	gencode::EPS8L3::ENSG00000198758.6	1785
protein_coding_genes	chr1	gencode::CSF1::ENSG00000184371.9	1665
protein_coding_genes	chr1	gencode::AHCYL1::ENSG00000168710.13	1593
protein_coding_genes	chr1	gencode::STRIP1::ENSG00000143093.10	2572
protein_coding_genes	chr1	gencode::ALX3::ENSG00000156150.6	1032
protein_coding_genes	chr1	gencode::UBL4B::ENSG00000186150.3	525
protein_coding_genes	chr1	gencode::SLC6A17::ENSG00000197106.6	2184
protein_coding_genes	chr1	gencode::KCNC4::ENSG00000116396.9	2026
protein_coding_genes	chr1	gencode::RBM15::ENSG00000162775.10	2992
protein_coding_genes	chr1	gencode::SLC16A4::ENSG00000168679.13	1484
protein_coding_genes	chr1	gencode::LAMTOR5::ENSG00000134248.9	554
protein_coding_genes	chr1	gencode::PROK1::ENSG00000143125.5	318
protein_coding_genes	chr1	gencode::KCNA10::ENSG00000143105.5	1536
protein_coding_genes	chr1	gencode::KCNA2::ENSG00000177301.9	1677
protein_coding_genes	chr1	gencode::KCNA3::ENSG00000177272.7	1728
protein_coding_genes	chr1	gencode::CD53::ENSG00000143119.8	660
protein_coding_genes	chr1	gencode::LRIF1::ENSG00000121931.11	2310
protein_coding_genes	chr1	gencode::DRAM2::ENSG00000156171.10	801
protein_coding_genes	chr1	gencode::CEPT1::ENSG00000134255.9	1251
protein_coding_genes	chr1	gencode::DENND2D::ENSG00000162777.12	1474
protein_coding_genes	chr1	gencode::CHI3L2::ENSG00000064886.9	1173
protein_coding_genes	chr1	gencode::CHIA::ENSG00000134216.14	1431
protein_coding_genes	chr1	gencode::PIFO::ENSG00000173947.9	576
protein_coding_genes	chr1	gencode::OVGP1::ENSG00000085465.11	2037
protein_coding_genes	chr1	gencode::WDR77::ENSG00000116455.9	1029
protein_coding_genes	chr1	gencode::ATP5F1::ENSG00000116459.6	771
protein_coding_genes	chr1	gencode::C1orf162::ENSG00000143110.7	468
protein_coding_genes	chr1	gencode::ADORA3::ENSG00000121933.13	1758
protein_coding_genes	chr1	gencode::RAP1A::ENSG00000116473.10	555
protein_coding_genes	chr1	gencode::FAM212B::ENSG00000197852.8	953
protein_coding_genes	chr1	gencode::DDX20::ENSG00000064703.7	2509
protein_coding_genes	chr1	gencode::KCND3::ENSG00000171385.5	1968
protein_coding_genes	chr1	gencode::CTTNBP2NL::ENSG00000143079.10	1920
protein_coding_genes	chr1	gencode::WNT2B::ENSG00000134245.13	1301
protein_coding_genes	chr1	gencode::ST7L::ENSG00000007341.14	1843
protein_coding_genes	chr1	gencode::CAPZA1::ENSG00000116489.8	861
protein_coding_genes	chr1	gencode::MOV10::ENSG00000155363.14	3046
protein_coding_genes	chr1	gencode::RHOC::ENSG00000155366.12	661
protein_coding_genes	chr1	gencode::RP11-426L16.10::ENSG00000271810.1	813
protein_coding_genes	chr1	gencode::PPM1J::ENSG00000155367.11	1518
protein_coding_genes	chr1	gencode::FAM19A3::ENSG00000184599.9	510
protein_coding_genes	chr1	gencode::SLC16A1::ENSG00000155380.7	1568
protein_coding_genes	chr1	gencode::LRIG2::ENSG00000198799.7	3198
protein_coding_genes	chr1	gencode::MAGI3::ENSG00000081026.14	4571
protein_coding_genes	chr1	gencode::PHTF1::ENSG00000116793.11	2313
protein_coding_genes	chr1	gencode::RSBN1::ENSG00000081019.9	2409
protein_coding_genes	chr1	gencode::PTPN22::ENSG00000134242.11	2453
protein_coding_genes	chr1	gencode::BCL2L15::ENSG00000188761.7	518
protein_coding_genes	chr1	gencode::AP4B1::ENSG00000134262.8	2294
protein_coding_genes	chr1	gencode::DCLRE1B::ENSG00000118655.4	1599
protein_coding_genes	chr1	gencode::HIPK1::ENSG00000163349.17	3735
protein_coding_genes	chr1	gencode::OLFML3::ENSG00000116774.7	1275
protein_coding_genes	chr1	gencode::SYT6::ENSG00000134207.10	1533
protein_coding_genes	chr1	gencode::TRIM33::ENSG00000197323.6	3456
protein_coding_genes	chr1	gencode::BCAS2::ENSG00000116752.5	678
protein_coding_genes	chr1	gencode::DENND2C::ENSG00000175984.10	2791
protein_coding_genes	chr1	gencode::AMPD1::ENSG00000116748.15	2343
protein_coding_genes	chr1	gencode::NRAS::ENSG00000213281.4	570
protein_coding_genes	chr1	gencode::CSDE1::ENSG00000009307.11	2535
protein_coding_genes	chr1	gencode::SIKE1::ENSG00000052723.7	636
protein_coding_genes	chr1	gencode::SYCP1::ENSG00000198765.7	2931
protein_coding_genes	chr1	gencode::TSHB::ENSG00000134200.2	417
protein_coding_genes	chr1	gencode::TSPAN2::ENSG00000134198.5	666
protein_coding_genes	chr1	gencode::NGF::ENSG00000134259.3	726
protein_coding_genes	chr1	gencode::VANGL1::ENSG00000173218.10	1575
protein_coding_genes	chr1	gencode::CASQ2::ENSG00000118729.10	1200
protein_coding_genes	chr1	gencode::NHLH2::ENSG00000177551.5	408
protein_coding_genes	chr1	gencode::SLC22A15::ENSG00000163393.8	1644
protein_coding_genes	chr1	gencode::MAB21L3::ENSG00000173212.4	1089
protein_coding_genes	chr1	gencode::AL136376.1::ENSG00000269279.1	342
protein_coding_genes	chr1	gencode::ATP1A1::ENSG00000163399.11	3084
protein_coding_genes	chr1	gencode::CD58::ENSG00000116815.11	774
protein_coding_genes	chr1	gencode::IGSF3::ENSG00000143061.13	3645
protein_coding_genes	chr1	gencode::C1orf137::ENSG00000203864.1	297
protein_coding_genes	chr1	gencode::CD2::ENSG00000116824.4	1076
protein_coding_genes	chr1	gencode::PTGFRN::ENSG00000134247.9	2640
protein_coding_genes	chr1	gencode::CD101::ENSG00000134256.8	3066
protein_coding_genes	chr1	gencode::TTF2::ENSG00000116830.7	3489
protein_coding_genes	chr1	gencode::TRIM45::ENSG00000134253.5	1809
protein_coding_genes	chr1	gencode::VTCN1::ENSG00000134258.12	890
protein_coding_genes	chr1	gencode::MAN1A2::ENSG00000198162.8	1926
protein_coding_genes	chr1	gencode::FAM46C::ENSG00000183508.4	1176
protein_coding_genes	chr1	gencode::GDAP2::ENSG00000196505.6	1539
protein_coding_genes	chr1	gencode::WDR3::ENSG00000065183.11	2885
protein_coding_genes	chr1	gencode::SPAG17::ENSG00000155761.9	6672
protein_coding_genes	chr1	gencode::TBX15::ENSG00000092607.9	1809
protein_coding_genes	chr1	gencode::WARS2::ENSG00000116874.7	1112
protein_coding_genes	chr1	gencode::HAO2::ENSG00000116882.10	1095
protein_coding_genes	chr1	gencode::HSD3B2::ENSG00000203859.5	1119
protein_coding_genes	chr1	gencode::HSD3B1::ENSG00000203857.5	1128
protein_coding_genes	chr1	gencode::ZNF697::ENSG00000143067.4	1638
protein_coding_genes	chr1	gencode::PHGDH::ENSG00000092621.7	1638
protein_coding_genes	chr1	gencode::HMGCS2::ENSG00000134240.7	1527
protein_coding_genes	chr1	gencode::REG4::ENSG00000134193.10	717
protein_coding_genes	chr1	gencode::ADAM30::ENSG00000134249.6	2373
protein_coding_genes	chr1	gencode::NOTCH2::ENSG00000134250.13	7490
protein_coding_genes	chr1	gencode::FAM72B::ENSG00000188610.8	450
protein_coding_genes	chr1	gencode::FCGR1B::ENSG00000198019.8	843
protein_coding_genes	chr1	gencode::PPIAL4G::ENSG00000236334.1	495
protein_coding_genes	chr1	gencode::FAM72D::ENSG00000215784.4	450
protein_coding_genes	chr1	gencode::NBPF8::ENSG00000162825.12	3315
protein_coding_genes	chr1	gencode::AL592284.1::ENSG00000231360.2	807
protein_coding_genes	chr1	gencode::PPIAL4B::ENSG00000255854.1	495
protein_coding_genes	chr1	gencode::NBPF9::ENSG00000168614.13	2061
protein_coding_genes	chr1	gencode::PDE4DIP::ENSG00000178104.15	9201
protein_coding_genes	chr1	gencode::AL590452.1::ENSG00000268172.1	381
protein_coding_genes	chr1	gencode::NOTCH2NL::ENSG00000213240.7	770
protein_coding_genes	chr1	gencode::NBPF10::ENSG00000163386.16	10881
protein_coding_genes	chr1	gencode::HFE2::ENSG00000168509.13	1281
protein_coding_genes	chr1	gencode::TXNIP::ENSG00000117289.7	1176
protein_coding_genes	chr1	gencode::POLR3GL::ENSG00000121851.8	657
protein_coding_genes	chr1	gencode::ANKRD34A::ENSG00000181039.7	1491
protein_coding_genes	chr1	gencode::LIX1L::ENSG00000152022.7	1014
protein_coding_genes	chr1	gencode::RBM8A::ENSG00000131795.8	525
protein_coding_genes	chr1	gencode::PEX11B::ENSG00000131779.6	794
protein_coding_genes	chr1	gencode::ITGA10::ENSG00000143127.8	3504
protein_coding_genes	chr1	gencode::ANKRD35::ENSG00000198483.8	3006
protein_coding_genes	chr1	gencode::PIAS3::ENSG00000131788.11	1983
protein_coding_genes	chr1	gencode::NUDT17::ENSG00000186364.7	987
protein_coding_genes	chr1	gencode::POLR3C::ENSG00000186141.4	1605
protein_coding_genes	chr1	gencode::RNF115::ENSG00000121848.9	915
protein_coding_genes	chr1	gencode::CD160::ENSG00000117281.11	713
protein_coding_genes	chr1	gencode::PDZK1::ENSG00000174827.9	1560
protein_coding_genes	chr1	gencode::GPR89A::ENSG00000117262.14	1368
protein_coding_genes	chr1	gencode::GPR89C::ENSG00000196644.8	963
protein_coding_genes	chr1	gencode::NBPF11::ENSG00000152042.13	2987
protein_coding_genes	chr1	gencode::NBPF12::ENSG00000186275.7	10007
protein_coding_genes	chr1	gencode::PRKAB2::ENSG00000131791.6	819
protein_coding_genes	chr1	gencode::FMO5::ENSG00000131781.8	1741
protein_coding_genes	chr1	gencode::CHD1L::ENSG00000131778.13	2694
protein_coding_genes	chr1	gencode::BCL9::ENSG00000116128.5	4281
protein_coding_genes	chr1	gencode::ACP6::ENSG00000162836.7	1323
protein_coding_genes	chr1	gencode::GJA5::ENSG00000143140.6	1077
protein_coding_genes	chr1	gencode::GJA8::ENSG00000121634.4	1302
protein_coding_genes	chr1	gencode::GPR89B::ENSG00000188092.10	1368
protein_coding_genes	chr1	gencode::NBPF24::ENSG00000203836.7	2598
protein_coding_genes	chr1	gencode::BX842679.1::ENSG00000269647.1	462
protein_coding_genes	chr1	gencode::PPIAL4A::ENSG00000255963.1	495
protein_coding_genes	chr1	gencode::NBPF14::ENSG00000122497.13	2766
protein_coding_genes	chr1	gencode::PPIAL4D::ENSG00000256374.1	495
protein_coding_genes	chr1	gencode::NBPF20::ENSG00000203832.6	13866
protein_coding_genes	chr1	gencode::NBPF15::ENSG00000243452.3	2013
protein_coding_genes	chr1	gencode::NBPF16::ENSG00000203827.7	2013
protein_coding_genes	chr1	gencode::HIST2H3PS2::ENSG00000203818.6	411
protein_coding_genes	chr1	gencode::FAM72C::ENSG00000203817.5	220
protein_coding_genes	chr1	gencode::PPIAL4C::ENSG00000198161.5	495
protein_coding_genes	chr1	gencode::AL358813.2::ENSG00000203815.2	510
protein_coding_genes	chr1	gencode::FCGR1A::ENSG00000150337.9	1125
protein_coding_genes	chr1	gencode::HIST2H2BF::ENSG00000203814.5	533
protein_coding_genes	chr1	gencode::HIST2H3D::ENSG00000183598.3	411
protein_coding_genes	chr1	gencode::HIST2H4A::ENSG00000183941.8	312
protein_coding_genes	chr1	gencode::HIST2H3C::ENSG00000203811.1	411
protein_coding_genes	chr1	gencode::HIST2H2AA3::ENSG00000183558.5	393
protein_coding_genes	chr1	gencode::HIST2H2AA4::ENSG00000203812.2	393
protein_coding_genes	chr1	gencode::HIST2H3A::ENSG00000203852.3	411
protein_coding_genes	chr1	gencode::HIST2H4B::ENSG00000182217.7	312
protein_coding_genes	chr1	gencode::HIST2H2BE::ENSG00000184678.8	381
protein_coding_genes	chr1	gencode::HIST2H2AC::ENSG00000184260.4	390
protein_coding_genes	chr1	gencode::HIST2H2AB::ENSG00000184270.3	393
protein_coding_genes	chr1	gencode::BOLA1::ENSG00000178096.8	414
protein_coding_genes	chr1	gencode::SV2A::ENSG00000159164.5	2233
protein_coding_genes	chr1	gencode::SF3B4::ENSG00000143368.9	1275
protein_coding_genes	chr1	gencode::MTMR11::ENSG00000014914.15	2165
protein_coding_genes	chr1	gencode::OTUD7B::ENSG00000163113.10	2532
protein_coding_genes	chr1	gencode::VPS45::ENSG00000136631.8	1951
protein_coding_genes	chr1	gencode::PLEKHO1::ENSG00000023902.9	1230
protein_coding_genes	chr1	gencode::ANP32E::ENSG00000143401.10	807
protein_coding_genes	chr1	gencode::CA14::ENSG00000118298.6	1014
protein_coding_genes	chr1	gencode::APH1A::ENSG00000117362.8	809
protein_coding_genes	chr1	gencode::C1orf54::ENSG00000118292.4	462
protein_coding_genes	chr1	gencode::C1orf51::ENSG00000159208.11	1158
protein_coding_genes	chr1	gencode::MRPS21::ENSG00000187145.10	264
protein_coding_genes	chr1	gencode::PRPF3::ENSG00000117360.8	2052
protein_coding_genes	chr1	gencode::RPRD2::ENSG00000163125.11	4409
protein_coding_genes	chr1	gencode::TARS2::ENSG00000143374.10	2157
protein_coding_genes	chr1	gencode::ECM1::ENSG00000143369.10	1710
protein_coding_genes	chr1	gencode::AL356356.1::ENSG00000225996.2	465
protein_coding_genes	chr1	gencode::ADAMTSL4::ENSG00000143382.9	3369
protein_coding_genes	chr1	gencode::ADAMTSL4-AS1::ENSG00000203804.3	390
protein_coding_genes	chr1	gencode::MCL1::ENSG00000143384.8	1064
protein_coding_genes	chr1	gencode::ENSA::ENSG00000143420.13	764
protein_coding_genes	chr1	gencode::GOLPH3L::ENSG00000143457.6	858
protein_coding_genes	chr1	gencode::HORMAD1::ENSG00000143452.11	1206
protein_coding_genes	chr1	gencode::CTSS::ENSG00000163131.6	996
protein_coding_genes	chr1	gencode::CTSK::ENSG00000143387.8	990
protein_coding_genes	chr1	gencode::ARNT::ENSG00000143437.16	2370
protein_coding_genes	chr1	gencode::SETDB1::ENSG00000143379.8	3930
protein_coding_genes	chr1	gencode::CERS2::ENSG00000143418.15	1302
protein_coding_genes	chr1	gencode::ANXA9::ENSG00000143412.5	1038
protein_coding_genes	chr1	gencode::FAM63A::ENSG00000143409.11	1554
protein_coding_genes	chr1	gencode::PRUNE::ENSG00000143363.11	1366
protein_coding_genes	chr1	gencode::BNIPL::ENSG00000163141.14	1074
protein_coding_genes	chr1	gencode::C1orf56::ENSG00000143443.9	1026
protein_coding_genes	chr1	gencode::CDC42SE1::ENSG00000197622.8	240
protein_coding_genes	chr1	gencode::MLLT11::ENSG00000213190.2	273
protein_coding_genes	chr1	gencode::GABPB2::ENSG00000143458.7	1347
protein_coding_genes	chr1	gencode::SEMA6C::ENSG00000143434.11	2793
protein_coding_genes	chr1	gencode::TNFAIP8L2::ENSG00000163154.5	555
protein_coding_genes	chr1	gencode::LYSMD1::ENSG00000163155.7	720
protein_coding_genes	chr1	gencode::SCNM1::ENSG00000163156.7	693
protein_coding_genes	chr1	gencode::TMOD4::ENSG00000163157.10	831
protein_coding_genes	chr1	gencode::VPS72::ENSG00000163159.7	1128
protein_coding_genes	chr1	gencode::PIP5K1A::ENSG00000143398.15	1771
protein_coding_genes	chr1	gencode::PSMD4::ENSG00000159352.11	1143
protein_coding_genes	chr1	gencode::RP11-126K1.2::ENSG00000232671.2	180
protein_coding_genes	chr1	gencode::ZNF687::ENSG00000143373.13	3312
protein_coding_genes	chr1	gencode::PI4KB::ENSG00000143393.12	2487
protein_coding_genes	chr1	gencode::RFX5::ENSG00000143390.13	1851
protein_coding_genes	chr1	gencode::SELENBP1::ENSG00000143416.16	1549
protein_coding_genes	chr1	gencode::PSMB4::ENSG00000159377.6	795
protein_coding_genes	chr1	gencode::POGZ::ENSG00000143442.17	4260
protein_coding_genes	chr1	gencode::CGN::ENSG00000143375.10	3612
protein_coding_genes	chr1	gencode::TUFT1::ENSG00000143367.11	1290
protein_coding_genes	chr1	gencode::SNX27::ENSG00000143376.8	1667
protein_coding_genes	chr1	gencode::CELF3::ENSG00000159409.10	1398
protein_coding_genes	chr1	gencode::AL589765.1::ENSG00000240510.2	414
protein_coding_genes	chr1	gencode::RIIAD1::ENSG00000178796.8	393
protein_coding_genes	chr1	gencode::MRPL9::ENSG00000143436.6	804
protein_coding_genes	chr1	gencode::OAZ3::ENSG00000143450.10	685
protein_coding_genes	chr1	gencode::TDRKH::ENSG00000182134.11	1686
protein_coding_genes	chr1	gencode::LINGO4::ENSG00000213171.2	1782
protein_coding_genes	chr1	gencode::RORC::ENSG00000143365.12	1766
protein_coding_genes	chr1	gencode::C2CD4D::ENSG00000225556.1	1062
protein_coding_genes	chr1	gencode::THEM5::ENSG00000196407.7	744
protein_coding_genes	chr1	gencode::THEM4::ENSG00000159445.8	770
protein_coding_genes	chr1	gencode::S100A10::ENSG00000197747.4	294
protein_coding_genes	chr1	gencode::S100A11::ENSG00000163191.5	318
protein_coding_genes	chr1	gencode::TCHHL1::ENSG00000182898.3	2715
protein_coding_genes	chr1	gencode::TCHH::ENSG00000159450.8	5832
protein_coding_genes	chr1	gencode::RPTN::ENSG00000215853.3	2355
protein_coding_genes	chr1	gencode::HRNR::ENSG00000197915.5	8553
protein_coding_genes	chr1	gencode::FLG::ENSG00000143631.10	12186
protein_coding_genes	chr1	gencode::FLG2::ENSG00000143520.6	7176
protein_coding_genes	chr1	gencode::CRNN::ENSG00000143536.7	1488
protein_coding_genes	chr1	gencode::LCE5A::ENSG00000186207.4	357
protein_coding_genes	chr1	gencode::CRCT1::ENSG00000169509.5	300
protein_coding_genes	chr1	gencode::LCE3E::ENSG00000185966.3	279
protein_coding_genes	chr1	gencode::LCE3D::ENSG00000163202.4	279
protein_coding_genes	chr1	gencode::LCE3C::ENSG00000244057.2	285
protein_coding_genes	chr1	gencode::LCE3B::ENSG00000187238.5	288
protein_coding_genes	chr1	gencode::LCE3A::ENSG00000185962.1	270
protein_coding_genes	chr1	gencode::LCE2D::ENSG00000187223.3	333
protein_coding_genes	chr1	gencode::LCE2C::ENSG00000187180.3	333
protein_coding_genes	chr1	gencode::LCE2B::ENSG00000159455.7	333
protein_coding_genes	chr1	gencode::LCE2A::ENSG00000187173.3	321
protein_coding_genes	chr1	gencode::LCE4A::ENSG00000187170.4	300
protein_coding_genes	chr1	gencode::C1orf68::ENSG00000198854.4	753
protein_coding_genes	chr1	gencode::KPRP::ENSG00000203786.5	1740
protein_coding_genes	chr1	gencode::LCE1F::ENSG00000240386.2	357
protein_coding_genes	chr1	gencode::LCE1E::ENSG00000186226.7	357
protein_coding_genes	chr1	gencode::LCE1D::ENSG00000172155.7	345
protein_coding_genes	chr1	gencode::LCE1C::ENSG00000197084.4	357
protein_coding_genes	chr1	gencode::LCE1B::ENSG00000196734.6	357
protein_coding_genes	chr1	gencode::LCE1A::ENSG00000186844.4	333
protein_coding_genes	chr1	gencode::LCE6A::ENSG00000235942.2	243
protein_coding_genes	chr1	gencode::SMCP::ENSG00000163206.5	351
protein_coding_genes	chr1	gencode::IVL::ENSG00000163207.5	1758
protein_coding_genes	chr1	gencode::SPRR4::ENSG00000184148.3	240
protein_coding_genes	chr1	gencode::SPRR1A::ENSG00000169474.3	270
protein_coding_genes	chr1	gencode::SPRR3::ENSG00000163209.10	510
protein_coding_genes	chr1	gencode::SPRR1B::ENSG00000169469.7	270
protein_coding_genes	chr1	gencode::SPRR2D::ENSG00000163216.6	219
protein_coding_genes	chr1	gencode::SPRR2A::ENSG00000241794.1	219
protein_coding_genes	chr1	gencode::SPRR2B::ENSG00000196805.6	219
protein_coding_genes	chr1	gencode::SPRR2E::ENSG00000203785.4	219
protein_coding_genes	chr1	gencode::SPRR2F::ENSG00000244094.1	219
protein_coding_genes	chr1	gencode::SPRR2G::ENSG00000159516.8	222
protein_coding_genes	chr1	gencode::LELP1::ENSG00000203784.2	297
protein_coding_genes	chr1	gencode::PRR9::ENSG00000203783.4	351
protein_coding_genes	chr1	gencode::LOR::ENSG00000203782.5	939
protein_coding_genes	chr1	gencode::PGLYRP3::ENSG00000159527.3	1026
protein_coding_genes	chr1	gencode::PGLYRP4::ENSG00000163218.10	1122
protein_coding_genes	chr1	gencode::S100A9::ENSG00000163220.10	345
protein_coding_genes	chr1	gencode::S100A12::ENSG00000163221.7	279
protein_coding_genes	chr1	gencode::S100A8::ENSG00000143546.5	282
protein_coding_genes	chr1	gencode::S100A7A::ENSG00000184330.7	306
protein_coding_genes	chr1	gencode::S100A7L2::ENSG00000197364.6	339
protein_coding_genes	chr1	gencode::S100A7::ENSG00000143556.4	306
protein_coding_genes	chr1	gencode::S100A6::ENSG00000197956.5	273
protein_coding_genes	chr1	gencode::S100A5::ENSG00000196420.3	333
protein_coding_genes	chr1	gencode::S100A4::ENSG00000196154.7	306
protein_coding_genes	chr1	gencode::S100A3::ENSG00000188015.5	306
protein_coding_genes	chr1	gencode::S100A2::ENSG00000196754.6	416
protein_coding_genes	chr1	gencode::S100A16::ENSG00000188643.6	312
protein_coding_genes	chr1	gencode::S100A14::ENSG00000189334.4	315
protein_coding_genes	chr1	gencode::S100A13::ENSG00000189171.9	297
protein_coding_genes	chr1	gencode::S100A1::ENSG00000160678.7	465
protein_coding_genes	chr1	gencode::CHTOP::ENSG00000160679.8	770
protein_coding_genes	chr1	gencode::SNAPIN::ENSG00000143553.6	411
protein_coding_genes	chr1	gencode::ILF2::ENSG00000143621.12	1232
protein_coding_genes	chr1	gencode::NPR1::ENSG00000169418.9	3186
protein_coding_genes	chr1	gencode::INTS3::ENSG00000143624.9	3327
protein_coding_genes	chr1	gencode::SLC27A3::ENSG00000143554.9	2436
protein_coding_genes	chr1	gencode::GATAD2B::ENSG00000143614.7	1782
protein_coding_genes	chr1	gencode::DENND4B::ENSG00000198837.5	4491
protein_coding_genes	chr1	gencode::CRTC2::ENSG00000160741.12	2082
protein_coding_genes	chr1	gencode::SLC39A1::ENSG00000143570.13	975
protein_coding_genes	chr1	gencode::CREB3L4::ENSG00000143578.11	1206
protein_coding_genes	chr1	gencode::JTB::ENSG00000143543.10	475
protein_coding_genes	chr1	gencode::RAB13::ENSG00000143545.4	612
protein_coding_genes	chr1	gencode::RPS27::ENSG00000177954.7	341
protein_coding_genes	chr1	gencode::NUP210L::ENSG00000143552.5	5667
protein_coding_genes	chr1	gencode::TPM3::ENSG00000143549.15	1229
protein_coding_genes	chr1	gencode::C1orf189::ENSG00000163263.6	306
protein_coding_genes	chr1	gencode::C1orf43::ENSG00000143612.14	766
protein_coding_genes	chr1	gencode::UBAP2L::ENSG00000143569.14	3386
protein_coding_genes	chr1	gencode::HAX1::ENSG00000143575.10	864
protein_coding_genes	chr1	gencode::AQP10::ENSG00000143595.8	994
protein_coding_genes	chr1	gencode::ATP8B2::ENSG00000143515.12	3976
protein_coding_genes	chr1	gencode::IL6R::ENSG00000160712.8	1407
protein_coding_genes	chr1	gencode::SHE::ENSG00000169291.5	1488
protein_coding_genes	chr1	gencode::TDRD10::ENSG00000163239.8	1134
protein_coding_genes	chr1	gencode::UBE2Q1::ENSG00000160714.5	1269
protein_coding_genes	chr1	gencode::CHRNB2::ENSG00000160716.4	1509
protein_coding_genes	chr1	gencode::ADAR::ENSG00000160710.11	3825
protein_coding_genes	chr1	gencode::AL606500.1::ENSG00000268141.1	21
protein_coding_genes	chr1	gencode::KCNN3::ENSG00000143603.14	2214
protein_coding_genes	chr1	gencode::PMVK::ENSG00000163344.5	579
protein_coding_genes	chr1	gencode::PBXIP1::ENSG00000163346.12	2367
protein_coding_genes	chr1	gencode::PYGO2::ENSG00000163348.3	1221
protein_coding_genes	chr1	gencode::SHC1::ENSG00000160691.14	1755
protein_coding_genes	chr1	gencode::CKS1B::ENSG00000173207.8	268
protein_coding_genes	chr1	gencode::FLAD1::ENSG00000160688.14	2013
protein_coding_genes	chr1	gencode::LENEP::ENSG00000163352.5	186
protein_coding_genes	chr1	gencode::ZBTB7B::ENSG00000160685.9	1722
protein_coding_genes	chr1	gencode::DCST2::ENSG00000163354.10	2372
protein_coding_genes	chr1	gencode::DCST1::ENSG00000163357.6	2247
protein_coding_genes	chr1	gencode::ADAM15::ENSG00000143537.9	2684
protein_coding_genes	chr1	gencode::EFNA3::ENSG00000143590.9	830
protein_coding_genes	chr1	gencode::EFNA3::ENSG00000251246.1	702
protein_coding_genes	chr1	gencode::EFNA4::ENSG00000243364.3	781
protein_coding_genes	chr1	gencode::EFNA1::ENSG00000169242.7	618
protein_coding_genes	chr1	gencode::SLC50A1::ENSG00000169241.13	675
protein_coding_genes	chr1	gencode::DPM3::ENSG00000179085.7	369
protein_coding_genes	chr1	gencode::RP11-201K10.3::ENSG00000273088.1	753
protein_coding_genes	chr1	gencode::KRTCAP2::ENSG00000163463.7	489
protein_coding_genes	chr1	gencode::TRIM46::ENSG00000163462.13	2519
protein_coding_genes	chr1	gencode::MUC1::ENSG00000185499.12	1515
protein_coding_genes	chr1	gencode::THBS3::ENSG00000169231.9	2871
protein_coding_genes	chr1	gencode::MTX1::ENSG00000173171.10	1401
protein_coding_genes	chr1	gencode::GBA::ENSG00000177628.11	1611
protein_coding_genes	chr1	gencode::FAM189B::ENSG00000160767.16	2010
protein_coding_genes	chr1	gencode::SCAMP3::ENSG00000116521.6	1044
protein_coding_genes	chr1	gencode::CLK2::ENSG00000176444.14	1500
protein_coding_genes	chr1	gencode::HCN3::ENSG00000143630.5	2325
protein_coding_genes	chr1	gencode::PKLR::ENSG00000143627.13	1732
protein_coding_genes	chr1	gencode::FDPS::ENSG00000160752.10	1260
protein_coding_genes	chr1	gencode::RUSC1::ENSG00000160753.11	2836
protein_coding_genes	chr1	gencode::ASH1L::ENSG00000116539.6	9024
protein_coding_genes	chr1	gencode::MSTO1::ENSG00000125459.10	2255
protein_coding_genes	chr1	gencode::YY1AP1::ENSG00000163374.15	2792
protein_coding_genes	chr1	gencode::DAP3::ENSG00000132676.11	1269
protein_coding_genes	chr1	gencode::GON4L::ENSG00000116580.14	6843
protein_coding_genes	chr1	gencode::SYT11::ENSG00000132718.7	1296
protein_coding_genes	chr1	gencode::RIT1::ENSG00000143622.6	711
protein_coding_genes	chr1	gencode::KIAA0907::ENSG00000132680.6	1895
protein_coding_genes	chr1	gencode::RXFP4::ENSG00000173080.4	1125
protein_coding_genes	chr1	gencode::ARHGEF2::ENSG00000116584.13	3225
protein_coding_genes	chr1	gencode::SSR2::ENSG00000163479.9	552
protein_coding_genes	chr1	gencode::UBQLN4::ENSG00000160803.7	1806
protein_coding_genes	chr1	gencode::LAMTOR2::ENSG00000116586.7	453
protein_coding_genes	chr1	gencode::RAB25::ENSG00000132698.9	642
protein_coding_genes	chr1	gencode::MEX3A::ENSG00000254726.2	1563
protein_coding_genes	chr1	gencode::LMNA::ENSG00000160789.15	2278
protein_coding_genes	chr1	gencode::SEMA4A::ENSG00000196189.8	2286
protein_coding_genes	chr1	gencode::SLC25A44::ENSG00000160785.9	945
protein_coding_genes	chr1	gencode::PMF1-BGLAP::ENSG00000260238.1	724
protein_coding_genes	chr1	gencode::PMF1::ENSG00000160783.15	890
protein_coding_genes	chr1	gencode::BGLAP::ENSG00000242252.1	303
protein_coding_genes	chr1	gencode::PAQR6::ENSG00000160781.11	1374
protein_coding_genes	chr1	gencode::SMG5::ENSG00000198952.7	3268
protein_coding_genes	chr1	gencode::TMEM79::ENSG00000163472.14	1244
protein_coding_genes	chr1	gencode::C1orf85::ENSG00000198715.7	1221
protein_coding_genes	chr1	gencode::VHLL::ENSG00000189030.8	420
protein_coding_genes	chr1	gencode::CCT3::ENSG00000163468.10	1638
protein_coding_genes	chr1	gencode::TSACC::ENSG00000163467.7	378
protein_coding_genes	chr1	gencode::RHBG::ENSG00000132677.8	1679
protein_coding_genes	chr1	gencode::C1orf61::ENSG00000125462.12	471
protein_coding_genes	chr1	gencode::MEF2D::ENSG00000116604.13	1701
protein_coding_genes	chr1	gencode::IQGAP3::ENSG00000183856.6	4896
protein_coding_genes	chr1	gencode::TTC24::ENSG00000187862.7	1749
protein_coding_genes	chr1	gencode::APOA1BP::ENSG00000163382.7	941
protein_coding_genes	chr1	gencode::GPATCH4::ENSG00000160818.12	1369
protein_coding_genes	chr1	gencode::HAPLN2::ENSG00000132702.8	1023
protein_coding_genes	chr1	gencode::BCAN::ENSG00000132692.14	2810
protein_coding_genes	chr1	gencode::NES::ENSG00000132688.10	4866
protein_coding_genes	chr1	gencode::CRABP2::ENSG00000143320.4	417
protein_coding_genes	chr1	gencode::ISG20L2::ENSG00000143319.12	1062
protein_coding_genes	chr1	gencode::RRNAD1::ENSG00000143303.7	1428
protein_coding_genes	chr1	gencode::MRPL24::ENSG00000143314.8	651
protein_coding_genes	chr1	gencode::HDGF::ENSG00000143321.14	924
protein_coding_genes	chr1	gencode::PRCC::ENSG00000143294.10	1476
protein_coding_genes	chr1	gencode::SH2D2A::ENSG00000027869.7	1200
protein_coding_genes	chr1	gencode::NTRK1::ENSG00000198400.7	2522
protein_coding_genes	chr1	gencode::INSRR::ENSG00000027644.4	3894
protein_coding_genes	chr1	gencode::PEAR1::ENSG00000187800.9	3114
protein_coding_genes	chr1	gencode::LRRC71::ENSG00000160838.9	1680
protein_coding_genes	chr1	gencode::ARHGEF11::ENSG00000132694.14	4742
protein_coding_genes	chr1	gencode::ETV3L::ENSG00000253831.1	1086
protein_coding_genes	chr1	gencode::ETV3::ENSG00000117036.7	1571
protein_coding_genes	chr1	gencode::FCRL5::ENSG00000143297.14	3162
protein_coding_genes	chr1	gencode::FCRL4::ENSG00000163518.6	1548
protein_coding_genes	chr1	gencode::FCRL3::ENSG00000160856.16	2262
protein_coding_genes	chr1	gencode::FCRL2::ENSG00000132704.11	1710
protein_coding_genes	chr1	gencode::FCRL1::ENSG00000163534.10	1352
protein_coding_genes	chr1	gencode::CD5L::ENSG00000073754.5	1044
protein_coding_genes	chr1	gencode::KIRREL::ENSG00000183853.13	2322
protein_coding_genes	chr1	gencode::CD1D::ENSG00000158473.6	1008
protein_coding_genes	chr1	gencode::CD1A::ENSG00000158477.6	984
protein_coding_genes	chr1	gencode::CD1C::ENSG00000158481.8	1002
protein_coding_genes	chr1	gencode::CD1B::ENSG00000158485.6	1002
protein_coding_genes	chr1	gencode::CD1E::ENSG00000158488.11	1344
protein_coding_genes	chr1	gencode::OR10T2::ENSG00000186306.1	945
protein_coding_genes	chr1	gencode::OR10K2::ENSG00000180708.4	939
protein_coding_genes	chr1	gencode::OR10K1::ENSG00000173285.2	942
protein_coding_genes	chr1	gencode::OR10R2::ENSG00000198965.3	1008
protein_coding_genes	chr1	gencode::OR6Y1::ENSG00000197532.1	978
protein_coding_genes	chr1	gencode::OR6P1::ENSG00000186440.1	954
protein_coding_genes	chr1	gencode::OR10X1::ENSG00000186400.3	981
protein_coding_genes	chr1	gencode::OR10Z1::ENSG00000198967.3	942
protein_coding_genes	chr1	gencode::SPTA1::ENSG00000163554.7	7260
protein_coding_genes	chr1	gencode::OR6K2::ENSG00000196171.2	975
protein_coding_genes	chr1	gencode::OR6K3::ENSG00000203757.1	996
protein_coding_genes	chr1	gencode::OR6K6::ENSG00000180433.4	1032
protein_coding_genes	chr1	gencode::OR6N1::ENSG00000197403.2	939
protein_coding_genes	chr1	gencode::OR6N2::ENSG00000188340.1	954
protein_coding_genes	chr1	gencode::MNDA::ENSG00000163563.7	1224
protein_coding_genes	chr1	gencode::PYHIN1::ENSG00000163564.10	1665
protein_coding_genes	chr1	gencode::IFI16::ENSG00000163565.14	2370
protein_coding_genes	chr1	gencode::AIM2::ENSG00000163568.9	1032
protein_coding_genes	chr1	gencode::CADM3::ENSG00000162706.8	1299
protein_coding_genes	chr1	gencode::DARC::ENSG00000213088.5	1038
protein_coding_genes	chr1	gencode::FCER1A::ENSG00000179639.6	774
protein_coding_genes	chr1	gencode::OR10J3::ENSG00000196266.4	990
protein_coding_genes	chr1	gencode::OR10J1::ENSG00000196184.7	963
protein_coding_genes	chr1	gencode::OR10J5::ENSG00000184155.7	930
protein_coding_genes	chr1	gencode::APCS::ENSG00000132703.3	672
protein_coding_genes	chr1	gencode::CRP::ENSG00000132693.8	675
protein_coding_genes	chr1	gencode::DUSP23::ENSG00000158716.4	453
protein_coding_genes	chr1	gencode::FCRL6::ENSG00000181036.9	1326
protein_coding_genes	chr1	gencode::SLAMF8::ENSG00000158714.6	858
protein_coding_genes	chr1	gencode::C1orf204::ENSG00000188004.5	708
protein_coding_genes	chr1	gencode::VSIG8::ENSG00000243284.1	1245
protein_coding_genes	chr1	gencode::CCDC19::ENSG00000213085.5	1656
protein_coding_genes	chr1	gencode::AL590560.1::ENSG00000269620.1	276
protein_coding_genes	chr1	gencode::TAGLN2::ENSG00000158710.10	663
protein_coding_genes	chr1	gencode::IGSF9::ENSG00000085552.12	3540
protein_coding_genes	chr1	gencode::SLAMF9::ENSG00000162723.5	870
protein_coding_genes	chr1	gencode::PIGM::ENSG00000143315.5	1272
protein_coding_genes	chr1	gencode::KCNJ10::ENSG00000177807.6	1140
protein_coding_genes	chr1	gencode::KCNJ9::ENSG00000162728.4	1182
protein_coding_genes	chr1	gencode::IGSF8::ENSG00000162729.9	1842
protein_coding_genes	chr1	gencode::ATP1A2::ENSG00000018625.10	3063
protein_coding_genes	chr1	gencode::ATP1A4::ENSG00000132681.12	3090
protein_coding_genes	chr1	gencode::CASQ1::ENSG00000143318.8	1191
protein_coding_genes	chr1	gencode::PEA15::ENSG00000162734.8	456
protein_coding_genes	chr1	gencode::DCAF8::ENSG00000132716.14	2355
protein_coding_genes	chr1	gencode::DCAF8::ENSG00000258465.2	2256
protein_coding_genes	chr1	gencode::PEX19::ENSG00000162735.14	900
protein_coding_genes	chr1	gencode::COPA::ENSG00000122218.10	3702
protein_coding_genes	chr1	gencode::NCSTN::ENSG00000162736.11	2155
protein_coding_genes	chr1	gencode::NHLH1::ENSG00000171786.5	402
protein_coding_genes	chr1	gencode::VANGL2::ENSG00000162738.5	1566
protein_coding_genes	chr1	gencode::SLAMF6::ENSG00000162739.9	999
protein_coding_genes	chr1	gencode::CD84::ENSG00000066294.10	1038
protein_coding_genes	chr1	gencode::SLAMF1::ENSG00000117090.10	1041
protein_coding_genes	chr1	gencode::CD48::ENSG00000117091.5	857
protein_coding_genes	chr1	gencode::SLAMF7::ENSG00000026751.12	1008
protein_coding_genes	chr1	gencode::LY9::ENSG00000122224.13	2099
protein_coding_genes	chr1	gencode::CD244::ENSG00000122223.8	1143
protein_coding_genes	chr1	gencode::ITLN1::ENSG00000179914.4	942
protein_coding_genes	chr1	gencode::ITLN2::ENSG00000158764.6	978
protein_coding_genes	chr1	gencode::F11R::ENSG00000158769.13	900
protein_coding_genes	chr1	gencode::TSTD1::ENSG00000215845.6	403
protein_coding_genes	chr1	gencode::USF1::ENSG00000158773.10	933
protein_coding_genes	chr1	gencode::ARHGAP30::ENSG00000186517.9	3306
protein_coding_genes	chr1	gencode::AL591806.1::ENSG00000268154.1	150
protein_coding_genes	chr1	gencode::PVRL4::ENSG00000143217.7	1533
protein_coding_genes	chr1	gencode::KLHDC9::ENSG00000162755.9	1069
protein_coding_genes	chr1	gencode::PFDN2::ENSG00000143256.4	465
protein_coding_genes	chr1	gencode::NIT1::ENSG00000158793.9	1052
protein_coding_genes	chr1	gencode::DEDD::ENSG00000158796.12	1047
protein_coding_genes	chr1	gencode::UFC1::ENSG00000143222.7	504
protein_coding_genes	chr1	gencode::USP21::ENSG00000143258.11	1698
protein_coding_genes	chr1	gencode::PPOX::ENSG00000143224.13	1668
protein_coding_genes	chr1	gencode::B4GALT3::ENSG00000158850.10	1182
protein_coding_genes	chr1	gencode::ADAMTS4::ENSG00000158859.9	2577
protein_coding_genes	chr1	gencode::NDUFS2::ENSG00000158864.8	1416
protein_coding_genes	chr1	gencode::FCER1G::ENSG00000158869.6	402
protein_coding_genes	chr1	gencode::AL590714.1::ENSG00000268387.1	231
protein_coding_genes	chr1	gencode::APOA2::ENSG00000158874.7	402
protein_coding_genes	chr1	gencode::TOMM40L::ENSG00000158882.8	927
protein_coding_genes	chr1	gencode::NR1I3::ENSG00000143257.7	1272
protein_coding_genes	chr1	gencode::PCP4L1::ENSG00000248485.1	207
protein_coding_genes	chr1	gencode::MPZ::ENSG00000158887.11	784
protein_coding_genes	chr1	gencode::SDHC::ENSG00000143252.10	617
protein_coding_genes	chr1	gencode::C1orf192::ENSG00000188931.3	534
protein_coding_genes	chr1	gencode::FCGR2A::ENSG00000143226.9	954
protein_coding_genes	chr1	gencode::HSPA6::ENSG00000173110.6	1932
protein_coding_genes	chr1	gencode::FCGR3A::ENSG00000203747.5	934
protein_coding_genes	chr1	gencode::FCGR2B::ENSG00000072694.14	1125
protein_coding_genes	chr1	gencode::FCGR2C::ENSG00000244682.3	177
protein_coding_genes	chr1	gencode::FCGR3B::ENSG00000162747.5	810
protein_coding_genes	chr1	gencode::FCRLA::ENSG00000132185.12	1167
protein_coding_genes	chr1	gencode::FCRLB::ENSG00000162746.10	1281
protein_coding_genes	chr1	gencode::DUSP12::ENSG00000081721.7	1023
protein_coding_genes	chr1	gencode::ATF6::ENSG00000118217.5	2013
protein_coding_genes	chr1	gencode::OLFML2B::ENSG00000162745.6	2256
protein_coding_genes	chr1	gencode::NOS1AP::ENSG00000198929.8	1575
protein_coding_genes	chr1	gencode::RP11-565P22.6::ENSG00000254706.1	541
protein_coding_genes	chr1	gencode::C1orf111::ENSG00000171722.7	786
protein_coding_genes	chr1	gencode::C1orf226::ENSG00000239887.3	948
protein_coding_genes	chr1	gencode::SH2D1B::ENSG00000198574.4	399
protein_coding_genes	chr1	gencode::UHMK1::ENSG00000152332.11	1306
protein_coding_genes	chr1	gencode::UAP1::ENSG00000117143.9	1569
protein_coding_genes	chr1	gencode::DDR2::ENSG00000162733.12	2568
protein_coding_genes	chr1	gencode::HSD17B7::ENSG00000132196.9	1042
protein_coding_genes	chr1	gencode::C1orf110::ENSG00000185860.9	1052
protein_coding_genes	chr1	gencode::RGS4::ENSG00000117152.9	921
protein_coding_genes	chr1	gencode::RGS5::ENSG00000143248.8	662
protein_coding_genes	chr1	gencode::NUF2::ENSG00000143228.8	1395
protein_coding_genes	chr1	gencode::PBX1::ENSG00000185630.14	1399
protein_coding_genes	chr1	gencode::LMX1A::ENSG00000162761.10	1149
protein_coding_genes	chr1	gencode::RXRG::ENSG00000143171.8	1392
protein_coding_genes	chr1	gencode::LRRC52::ENSG00000162763.3	942
protein_coding_genes	chr1	gencode::MGST3::ENSG00000143198.8	569
protein_coding_genes	chr1	gencode::ALDH9A1::ENSG00000143149.8	1557
protein_coding_genes	chr1	gencode::TMCO1::ENSG00000143183.12	720
protein_coding_genes	chr1	gencode::UCK2::ENSG00000143179.8	786
protein_coding_genes	chr1	gencode::AL626787.1::ENSG00000267884.1	396
protein_coding_genes	chr1	gencode::FAM78B::ENSG00000188859.5	786
protein_coding_genes	chr1	gencode::POGK::ENSG00000143157.7	1830
protein_coding_genes	chr1	gencode::TADA1::ENSG00000152382.5	1008
protein_coding_genes	chr1	gencode::ILDR2::ENSG00000143195.8	1987
protein_coding_genes	chr1	gencode::MAEL::ENSG00000143194.8	1305
protein_coding_genes	chr1	gencode::GPA33::ENSG00000143167.7	960
protein_coding_genes	chr1	gencode::DUSP27::ENSG00000198842.5	3477
protein_coding_genes	chr1	gencode::POU2F1::ENSG00000143190.17	2391
protein_coding_genes	chr1	gencode::CD247::ENSG00000198821.6	495
protein_coding_genes	chr1	gencode::CREG1::ENSG00000143162.7	663
protein_coding_genes	chr1	gencode::RCSD1::ENSG00000198771.6	1251
protein_coding_genes	chr1	gencode::MPZL1::ENSG00000197965.7	810
protein_coding_genes	chr1	gencode::ADCY10::ENSG00000143199.13	4923
protein_coding_genes	chr1	gencode::MPC2::ENSG00000143158.6	384
protein_coding_genes	chr1	gencode::DCAF6::ENSG00000143164.11	2856
protein_coding_genes	chr1	gencode::GPR161::ENSG00000143147.10	1822
protein_coding_genes	chr1	gencode::TIPRL::ENSG00000143155.8	840
protein_coding_genes	chr1	gencode::SFT2D2::ENSG00000213064.5	483
protein_coding_genes	chr1	gencode::TBX19::ENSG00000143178.8	1347
protein_coding_genes	chr1	gencode::XCL2::ENSG00000143185.3	345
protein_coding_genes	chr1	gencode::XCL1::ENSG00000143184.4	345
protein_coding_genes	chr1	gencode::DPT::ENSG00000143196.4	606
protein_coding_genes	chr1	gencode::ATP1B1::ENSG00000143153.8	985
protein_coding_genes	chr1	gencode::NME7::ENSG00000143156.9	1131
protein_coding_genes	chr1	gencode::BLZF1::ENSG00000117475.9	1260
protein_coding_genes	chr1	gencode::CCDC181::ENSG00000117477.8	1530
protein_coding_genes	chr1	gencode::SLC19A2::ENSG00000117479.8	1494
protein_coding_genes	chr1	gencode::F5::ENSG00000198734.6	6690
protein_coding_genes	chr1	gencode::SELP::ENSG00000174175.12	2499
protein_coding_genes	chr1	gencode::SELL::ENSG00000188404.4	1158
protein_coding_genes	chr1	gencode::SELE::ENSG00000007908.11	1833
protein_coding_genes	chr1	gencode::METTL18::ENSG00000171806.7	1119
protein_coding_genes	chr1	gencode::C1orf112::ENSG00000000460.12	2761
protein_coding_genes	chr1	gencode::SCYL3::ENSG00000000457.9	2229
protein_coding_genes	chr1	gencode::KIFAP3::ENSG00000075945.8	2464
protein_coding_genes	chr1	gencode::METTL11B::ENSG00000203740.3	852
protein_coding_genes	chr1	gencode::GORAB::ENSG00000120370.8	1189
protein_coding_genes	chr1	gencode::PRRX1::ENSG00000116132.7	797
protein_coding_genes	chr1	gencode::MROH9::ENSG00000117501.10	2712
protein_coding_genes	chr1	gencode::FMO3::ENSG00000007933.8	1671
protein_coding_genes	chr1	gencode::FMO6P::ENSG00000117507.4	1257
protein_coding_genes	chr1	gencode::FMO2::ENSG00000094963.9	1416
protein_coding_genes	chr1	gencode::FMO1::ENSG00000010932.11	1599
protein_coding_genes	chr1	gencode::FMO4::ENSG00000076258.5	1677
protein_coding_genes	chr1	gencode::PRRC2C::ENSG00000117523.11	8697
protein_coding_genes	chr1	gencode::MYOC::ENSG00000034971.10	1515
protein_coding_genes	chr1	gencode::VAMP4::ENSG00000117533.10	426
protein_coding_genes	chr1	gencode::METTL13::ENSG00000010165.15	2117
protein_coding_genes	chr1	gencode::DNM3::ENSG00000197959.9	2670
protein_coding_genes	chr1	gencode::C1orf105::ENSG00000180999.6	813
protein_coding_genes	chr1	gencode::PIGC::ENSG00000135845.5	894
protein_coding_genes	chr1	gencode::SUCO::ENSG00000094975.9	4353
protein_coding_genes	chr1	gencode::FASLG::ENSG00000117560.6	846
protein_coding_genes	chr1	gencode::TNFSF18::ENSG00000120337.7	600
protein_coding_genes	chr1	gencode::TNFSF4::ENSG00000117586.6	555
protein_coding_genes	chr1	gencode::PRDX6::ENSG00000117592.8	675
protein_coding_genes	chr1	gencode::SLC9C2::ENSG00000162753.10	3375
protein_coding_genes	chr1	gencode::ANKRD45::ENSG00000183831.6	801
protein_coding_genes	chr1	gencode::KLHL20::ENSG00000076321.6	1837
protein_coding_genes	chr1	gencode::CENPL::ENSG00000120334.11	1173
protein_coding_genes	chr1	gencode::DARS2::ENSG00000117593.8	1938
protein_coding_genes	chr1	gencode::ZBTB37::ENSG00000185278.10	1575
protein_coding_genes	chr1	gencode::SERPINC1::ENSG00000117601.9	1395
protein_coding_genes	chr1	gencode::RC3H1::ENSG00000135870.7	3405
protein_coding_genes	chr1	gencode::RABGAP1L::ENSG00000152061.17	3825
protein_coding_genes	chr1	gencode::GPR52::ENSG00000203737.2	1086
protein_coding_genes	chr1	gencode::CACYBP::ENSG00000116161.13	687
protein_coding_genes	chr1	gencode::MRPS14::ENSG00000120333.4	387
protein_coding_genes	chr1	gencode::TNN::ENSG00000120332.11	3900
protein_coding_genes	chr1	gencode::KIAA0040::ENSG00000235750.5	300
protein_coding_genes	chr1	gencode::TNR::ENSG00000116147.12	4077
protein_coding_genes	chr1	gencode::RFWD2::ENSG00000143207.15	2196
protein_coding_genes	chr1	gencode::PAPPA2::ENSG00000116183.6	5429
protein_coding_genes	chr1	gencode::ASTN1::ENSG00000152092.11	3953
protein_coding_genes	chr1	gencode::BRINP2::ENSG00000198797.6	2352
protein_coding_genes	chr1	gencode::SEC16B::ENSG00000120341.14	3286
protein_coding_genes	chr1	gencode::RASAL2::ENSG00000075391.12	3877
protein_coding_genes	chr1	gencode::TEX35::ENSG00000240021.5	1221
protein_coding_genes	chr1	gencode::C1orf220::ENSG00000213057.4	321
protein_coding_genes	chr1	gencode::C1ORF220::ENSG00000184909.8	405
protein_coding_genes	chr1	gencode::RALGPS2::ENSG00000116191.13	1752
protein_coding_genes	chr1	gencode::ANGPTL1::ENSG00000116194.8	1476
protein_coding_genes	chr1	gencode::FAM20B::ENSG00000116199.7	1230
protein_coding_genes	chr1	gencode::TOR3A::ENSG00000186283.9	1262
protein_coding_genes	chr1	gencode::ABL2::ENSG00000143322.15	3702
protein_coding_genes	chr1	gencode::SOAT1::ENSG00000057252.8	1653
protein_coding_genes	chr1	gencode::AXDND1::ENSG00000162779.16	3182
protein_coding_genes	chr1	gencode::AL160286.1::ENSG00000269064.1	129
protein_coding_genes	chr1	gencode::NPHS2::ENSG00000116218.8	1152
protein_coding_genes	chr1	gencode::TDRD5::ENSG00000162782.11	3108
protein_coding_genes	chr1	gencode::FAM163A::ENSG00000143340.6	504
protein_coding_genes	chr1	gencode::TOR1AIP2::ENSG00000169905.8	1413
protein_coding_genes	chr1	gencode::IFRG15::ENSG00000258664.1	396
protein_coding_genes	chr1	gencode::TOR1AIP1::ENSG00000143337.14	1800
protein_coding_genes	chr1	gencode::CEP350::ENSG00000135837.11	9354
protein_coding_genes	chr1	gencode::QSOX1::ENSG00000116260.12	2253
protein_coding_genes	chr1	gencode::LHX4::ENSG00000121454.4	1173
protein_coding_genes	chr1	gencode::ACBD6::ENSG00000135847.5	849
protein_coding_genes	chr1	gencode::XPR1::ENSG00000143324.9	2091
protein_coding_genes	chr1	gencode::KIAA1614::ENSG00000135835.6	3573
protein_coding_genes	chr1	gencode::AL162431.1::ENSG00000234237.2	168
protein_coding_genes	chr1	gencode::STX6::ENSG00000135823.9	768
protein_coding_genes	chr1	gencode::MR1::ENSG00000153029.10	1026
protein_coding_genes	chr1	gencode::IER5::ENSG00000162783.8	984
protein_coding_genes	chr1	gencode::CACNA1E::ENSG00000198216.6	7063
protein_coding_genes	chr1	gencode::ZNF648::ENSG00000179930.5	1707
protein_coding_genes	chr1	gencode::GLUL::ENSG00000135821.12	1122
protein_coding_genes	chr1	gencode::TEDDM1::ENSG00000203730.2	822
protein_coding_genes	chr1	gencode::RGSL1::ENSG00000121446.13	3336
protein_coding_genes	chr1	gencode::RNASEL::ENSG00000135828.7	2280
protein_coding_genes	chr1	gencode::RGS16::ENSG00000143333.6	609
protein_coding_genes	chr1	gencode::RGS8::ENSG00000135824.8	623
protein_coding_genes	chr1	gencode::NPL::ENSG00000135838.9	1313
protein_coding_genes	chr1	gencode::DHX9::ENSG00000135829.12	3813
protein_coding_genes	chr1	gencode::SHCBP1L::ENSG00000157060.10	2010
protein_coding_genes	chr1	gencode::LAMC1::ENSG00000135862.5	4830
protein_coding_genes	chr1	gencode::LAMC2::ENSG00000058085.10	3590
protein_coding_genes	chr1	gencode::NMNAT2::ENSG00000157064.6	994
protein_coding_genes	chr1	gencode::SMG7::ENSG00000116698.16	3905
protein_coding_genes	chr1	gencode::NCF2::ENSG00000116701.10	1581
protein_coding_genes	chr1	gencode::ARPC5::ENSG00000162704.11	480
protein_coding_genes	chr1	gencode::APOBEC4::ENSG00000173627.6	1104
protein_coding_genes	chr1	gencode::RGL1::ENSG00000143344.11	2439
protein_coding_genes	chr1	gencode::COLGALT2::ENSG00000198756.6	1985
protein_coding_genes	chr1	gencode::TSEN15::ENSG00000198860.7	532
protein_coding_genes	chr1	gencode::C1orf21::ENSG00000116667.8	366
protein_coding_genes	chr1	gencode::EDEM3::ENSG00000116406.14	2847
protein_coding_genes	chr1	gencode::FAM129A::ENSG00000135842.12	2787
protein_coding_genes	chr1	gencode::RNF2::ENSG00000121481.6	1011
protein_coding_genes	chr1	gencode::TRMT1L::ENSG00000121486.7	2267
protein_coding_genes	chr1	gencode::SWT1::ENSG00000116668.8	2703
protein_coding_genes	chr1	gencode::IVNS1ABP::ENSG00000116679.11	1983
protein_coding_genes	chr1	gencode::HMCN1::ENSG00000143341.7	16908
protein_coding_genes	chr1	gencode::PRG4::ENSG00000116690.7	4215
protein_coding_genes	chr1	gencode::TPR::ENSG00000047410.9	7092
protein_coding_genes	chr1	gencode::C1orf27::ENSG00000157181.10	1365
protein_coding_genes	chr1	gencode::AL596220.1::ENSG00000268662.1	135
protein_coding_genes	chr1	gencode::OCLM::ENSG00000262180.1	135
protein_coding_genes	chr1	gencode::PDC::ENSG00000116703.12	741
protein_coding_genes	chr1	gencode::PTGS2::ENSG00000073756.7	1815
protein_coding_genes	chr1	gencode::PLA2G4A::ENSG00000116711.8	2250
protein_coding_genes	chr1	gencode::BRINP3::ENSG00000162670.8	2301
protein_coding_genes	chr1	gencode::RGS18::ENSG00000150681.5	708
protein_coding_genes	chr1	gencode::RGS21::ENSG00000253148.1	459
protein_coding_genes	chr1	gencode::RGS1::ENSG00000090104.7	696
protein_coding_genes	chr1	gencode::RGS13::ENSG00000127074.10	480
protein_coding_genes	chr1	gencode::RGS2::ENSG00000116741.6	636
protein_coding_genes	chr1	gencode::UCHL5::ENSG00000116750.9	1128
protein_coding_genes	chr1	gencode::TROVE2::ENSG00000116747.8	1666
protein_coding_genes	chr1	gencode::GLRX2::ENSG00000023572.4	617
protein_coding_genes	chr1	gencode::CDC73::ENSG00000134371.9	1596
protein_coding_genes	chr1	gencode::B3GALT2::ENSG00000162630.5	1269
protein_coding_genes	chr1	gencode::KCNT2::ENSG00000162687.12	3453
protein_coding_genes	chr1	gencode::CFH::ENSG00000000971.11	3710
protein_coding_genes	chr1	gencode::CFHR3::ENSG00000116785.9	1079
protein_coding_genes	chr1	gencode::CFHR1::ENSG00000244414.2	993
protein_coding_genes	chr1	gencode::CFHR2::ENSG00000080910.7	871
protein_coding_genes	chr1	gencode::CFHR4::ENSG00000134365.8	1780
protein_coding_genes	chr1	gencode::CFHR5::ENSG00000134389.8	1782
protein_coding_genes	chr1	gencode::F13B::ENSG00000143278.3	1986
protein_coding_genes	chr1	gencode::ASPM::ENSG00000066279.12	10434
protein_coding_genes	chr1	gencode::ZBTB41::ENSG00000177888.7	2730
protein_coding_genes	chr1	gencode::CRB1::ENSG00000134376.10	4360
protein_coding_genes	chr1	gencode::DENND1B::ENSG00000213047.7	1333
protein_coding_genes	chr1	gencode::C1orf53::ENSG00000203724.6	438
protein_coding_genes	chr1	gencode::LHX9::ENSG00000143355.11	1352
protein_coding_genes	chr1	gencode::NEK7::ENSG00000151414.10	1071
protein_coding_genes	chr1	gencode::ATP6V1G3::ENSG00000151418.7	403
protein_coding_genes	chr1	gencode::PTPRC::ENSG00000081237.14	4096
protein_coding_genes	chr1	gencode::NR5A2::ENSG00000116833.9	1626
protein_coding_genes	chr1	gencode::ZNF281::ENSG00000162702.7	2688
protein_coding_genes	chr1	gencode::KIF14::ENSG00000118193.7	4947
protein_coding_genes	chr1	gencode::DDX59::ENSG00000118197.9	2115
protein_coding_genes	chr1	gencode::CAMSAP2::ENSG00000118200.10	4470
protein_coding_genes	chr1	gencode::GPR25::ENSG00000170128.2	1086
protein_coding_genes	chr1	gencode::C1orf106::ENSG00000163362.6	1992
protein_coding_genes	chr1	gencode::KIF21B::ENSG00000116852.10	4972
protein_coding_genes	chr1	gencode::CACNA1S::ENSG00000081248.6	5622
protein_coding_genes	chr1	gencode::ASCL5::ENSG00000232237.2	837
protein_coding_genes	chr1	gencode::TMEM9::ENSG00000116857.12	561
protein_coding_genes	chr1	gencode::IGFN1::ENSG00000163395.12	11145
protein_coding_genes	chr1	gencode::PKP1::ENSG00000081277.7	2244
protein_coding_genes	chr1	gencode::TNNT2::ENSG00000118194.14	950
protein_coding_genes	chr1	gencode::LAD1::ENSG00000159166.9	1634
protein_coding_genes	chr1	gencode::TNNI1::ENSG00000159173.14	564
protein_coding_genes	chr1	gencode::PHLDA3::ENSG00000174307.5	384
protein_coding_genes	chr1	gencode::CSRP1::ENSG00000159176.9	651
protein_coding_genes	chr1	gencode::AC096677.1::ENSG00000269690.1	726
protein_coding_genes	chr1	gencode::NAV1::ENSG00000134369.11	5726
protein_coding_genes	chr1	gencode::IPO9::ENSG00000198700.5	3126
protein_coding_genes	chr1	gencode::SHISA4::ENSG00000198892.6	594
protein_coding_genes	chr1	gencode::LMOD1::ENSG00000163431.11	1803
protein_coding_genes	chr1	gencode::TIMM17A::ENSG00000134375.6	516
protein_coding_genes	chr1	gencode::RNPEP::ENSG00000176393.6	1953
protein_coding_genes	chr1	gencode::ELF3::ENSG00000163435.11	1116
protein_coding_genes	chr1	gencode::GPR37L1::ENSG00000170075.8	1446
protein_coding_genes	chr1	gencode::ARL8A::ENSG00000143862.3	561
protein_coding_genes	chr1	gencode::PTPN7::ENSG00000143851.11	1463
protein_coding_genes	chr1	gencode::LGR6::ENSG00000133067.13	3043
protein_coding_genes	chr1	gencode::UBE2T::ENSG00000077152.5	594
protein_coding_genes	chr1	gencode::PPP1R12B::ENSG00000077157.16	3191
protein_coding_genes	chr1	gencode::SYT2::ENSG00000143858.7	1260
protein_coding_genes	chr1	gencode::KDM5B::ENSG00000117139.12	4743
protein_coding_genes	chr1	gencode::RP11-480I12.4::ENSG00000184774.6	618
protein_coding_genes	chr1	gencode::RABIF::ENSG00000183155.4	372
protein_coding_genes	chr1	gencode::KLHL12::ENSG00000117153.11	1821
protein_coding_genes	chr1	gencode::ADIPOR1::ENSG00000159346.8	1128
protein_coding_genes	chr1	gencode::CYB5R1::ENSG00000159348.8	918
protein_coding_genes	chr1	gencode::TMEM183A::ENSG00000163444.7	1131
protein_coding_genes	chr1	gencode::PPFIA4::ENSG00000143847.11	3702
protein_coding_genes	chr1	gencode::MYOG::ENSG00000122180.4	675
protein_coding_genes	chr1	gencode::ADORA1::ENSG00000163485.11	1018
protein_coding_genes	chr1	gencode::MYBPH::ENSG00000133055.4	1434
protein_coding_genes	chr1	gencode::CHI3L1::ENSG00000133048.8	1152
protein_coding_genes	chr1	gencode::CHIT1::ENSG00000133063.11	1431
protein_coding_genes	chr1	gencode::BTG2::ENSG00000159388.5	477
protein_coding_genes	chr1	gencode::FMOD::ENSG00000122176.10	1131
protein_coding_genes	chr1	gencode::PRELP::ENSG00000188783.5	1149
protein_coding_genes	chr1	gencode::OPTC::ENSG00000188770.5	999
protein_coding_genes	chr1	gencode::ATP2B4::ENSG00000058668.10	3796
protein_coding_genes	chr1	gencode::LAX1::ENSG00000122188.8	1238
protein_coding_genes	chr1	gencode::ZBED6::ENSG00000257315.1	2940
protein_coding_genes	chr1	gencode::ZC3H11A::ENSG00000058673.11	2433
protein_coding_genes	chr1	gencode::SNRPE::ENSG00000182004.8	279
protein_coding_genes	chr1	gencode::SOX13::ENSG00000143842.10	1869
protein_coding_genes	chr1	gencode::ETNK2::ENSG00000143845.10	1267
protein_coding_genes	chr1	gencode::REN::ENSG00000143839.12	1221
protein_coding_genes	chr1	gencode::KISS1::ENSG00000170498.7	417
protein_coding_genes	chr1	gencode::GOLT1A::ENSG00000174567.7	399
protein_coding_genes	chr1	gencode::PLEKHA6::ENSG00000143850.8	3207
protein_coding_genes	chr1	gencode::PPP1R15B::ENSG00000158615.8	2142
protein_coding_genes	chr1	gencode::PIK3C2B::ENSG00000133056.9	4905
protein_coding_genes	chr1	gencode::MDM4::ENSG00000198625.8	1567
protein_coding_genes	chr1	gencode::LRRN2::ENSG00000170382.7	2142
protein_coding_genes	chr1	gencode::NFASC::ENSG00000163531.11	4211
protein_coding_genes	chr1	gencode::CNTN2::ENSG00000184144.5	3123
protein_coding_genes	chr1	gencode::TMEM81::ENSG00000174529.6	768
protein_coding_genes	chr1	gencode::RBBP5::ENSG00000117222.9	1617
protein_coding_genes	chr1	gencode::DSTYK::ENSG00000133059.12	2790
protein_coding_genes	chr1	gencode::TMCC2::ENSG00000133069.10	2229
protein_coding_genes	chr1	gencode::NUAK2::ENSG00000163545.7	1887
protein_coding_genes	chr1	gencode::KLHDC8A::ENSG00000162873.10	1090
protein_coding_genes	chr1	gencode::LEMD1::ENSG00000186007.5	546
protein_coding_genes	chr1	gencode::CDK18::ENSG00000117266.11	1515
protein_coding_genes	chr1	gencode::MFSD4::ENSG00000174514.8	1545
protein_coding_genes	chr1	gencode::ELK4::ENSG00000158711.9	1434
protein_coding_genes	chr1	gencode::SLC45A3::ENSG00000158715.5	1662
protein_coding_genes	chr1	gencode::AC119673.1::ENSG00000268313.1	249
protein_coding_genes	chr1	gencode::NUCKS1::ENSG00000069275.12	732
protein_coding_genes	chr1	gencode::RAB7L1::ENSG00000117280.8	612
protein_coding_genes	chr1	gencode::SLC41A1::ENSG00000133065.6	1542
protein_coding_genes	chr1	gencode::PM20D1::ENSG00000162877.8	1509
protein_coding_genes	chr1	gencode::SLC26A9::ENSG00000174502.14	2668
protein_coding_genes	chr1	gencode::FAM72A::ENSG00000196550.6	667
protein_coding_genes	chr1	gencode::AVPR1B::ENSG00000198049.5	1275
protein_coding_genes	chr1	gencode::C1orf186::ENSG00000196533.6	519
protein_coding_genes	chr1	gencode::CTSE::ENSG00000196188.6	1249
protein_coding_genes	chr1	gencode::SRGAP2::ENSG00000163486.8	2835
protein_coding_genes	chr1	gencode::IKBKE::ENSG00000143466.9	2151
protein_coding_genes	chr1	gencode::C1orf147::ENSG00000162888.4	813
protein_coding_genes	chr1	gencode::RASSF5::ENSG00000136653.15	1377
protein_coding_genes	chr1	gencode::EIF2D::ENSG00000143486.11	1755
protein_coding_genes	chr1	gencode::DYRK3::ENSG00000143479.11	1784
protein_coding_genes	chr1	gencode::MAPKAPK2::ENSG00000162889.6	1257
protein_coding_genes	chr1	gencode::IL10::ENSG00000136634.5	537
protein_coding_genes	chr1	gencode::IL19::ENSG00000142224.11	648
protein_coding_genes	chr1	gencode::IL20::ENSG00000162891.6	531
protein_coding_genes	chr1	gencode::IL24::ENSG00000162892.11	624
protein_coding_genes	chr1	gencode::FAIM3::ENSG00000162894.7	1173
protein_coding_genes	chr1	gencode::PIGR::ENSG00000162896.5	2295
protein_coding_genes	chr1	gencode::FCAMR::ENSG00000162897.10	1734
protein_coding_genes	chr1	gencode::C1orf116::ENSG00000182795.12	1806
protein_coding_genes	chr1	gencode::YOD1::ENSG00000180667.6	1098
protein_coding_genes	chr1	gencode::PFKFB2::ENSG00000123836.10	1584
protein_coding_genes	chr1	gencode::C4BPB::ENSG00000123843.8	1037
protein_coding_genes	chr1	gencode::C4BPA::ENSG00000123838.6	1794
protein_coding_genes	chr1	gencode::CD55::ENSG00000196352.9	1662
protein_coding_genes	chr1	gencode::CR2::ENSG00000117322.12	3279
protein_coding_genes	chr1	gencode::CR1::ENSG00000203710.6	7470
protein_coding_genes	chr1	gencode::CR1L::ENSG00000197721.12	1710
protein_coding_genes	chr1	gencode::CD46::ENSG00000117335.14	1256
protein_coding_genes	chr1	gencode::CD34::ENSG00000174059.12	1296
protein_coding_genes	chr1	gencode::PLXNA2::ENSG00000076356.6	5685
protein_coding_genes	chr1	gencode::CAMK1G::ENSG00000008118.5	1431
protein_coding_genes	chr1	gencode::LAMB3::ENSG00000196878.8	3519
protein_coding_genes	chr1	gencode::G0S2::ENSG00000123689.5	312
protein_coding_genes	chr1	gencode::HSD11B1::ENSG00000117594.5	879
protein_coding_genes	chr1	gencode::TRAF3IP3::ENSG00000009790.10	1708
protein_coding_genes	chr1	gencode::C1orf74::ENSG00000162757.3	810
protein_coding_genes	chr1	gencode::IRF6::ENSG00000117595.6	1404
protein_coding_genes	chr1	gencode::DIEXF::ENSG00000117597.13	2271
protein_coding_genes	chr1	gencode::SYT14::ENSG00000143469.12	1883
protein_coding_genes	chr1	gencode::SERTAD4::ENSG00000082497.7	1071
protein_coding_genes	chr1	gencode::HHAT::ENSG00000054392.8	1743
protein_coding_genes	chr1	gencode::KCNH1::ENSG00000143473.7	2970
protein_coding_genes	chr1	gencode::RCOR3::ENSG00000117625.9	1695
protein_coding_genes	chr1	gencode::TRAF5::ENSG00000082512.10	1674
protein_coding_genes	chr1	gencode::RD3::ENSG00000198570.5	588
protein_coding_genes	chr1	gencode::SLC30A1::ENSG00000170385.9	1524
protein_coding_genes	chr1	gencode::NEK2::ENSG00000117650.8	1382
protein_coding_genes	chr1	gencode::LPGAT1::ENSG00000123684.8	1113
protein_coding_genes	chr1	gencode::INTS7::ENSG00000143493.8	2889
protein_coding_genes	chr1	gencode::DTL::ENSG00000143476.13	2193
protein_coding_genes	chr1	gencode::PPP2R5A::ENSG00000066027.7	1471
protein_coding_genes	chr1	gencode::TMEM206::ENSG00000065600.8	1236
protein_coding_genes	chr1	gencode::NENF::ENSG00000117691.5	519
protein_coding_genes	chr1	gencode::ATF3::ENSG00000162772.12	606
protein_coding_genes	chr1	gencode::FAM71A::ENSG00000162771.6	1785
protein_coding_genes	chr1	gencode::BATF3::ENSG00000123685.4	384
protein_coding_genes	chr1	gencode::NSL1::ENSG00000117697.10	969
protein_coding_genes	chr1	gencode::TATDN3::ENSG00000203705.6	846
protein_coding_genes	chr1	gencode::C1orf227::ENSG00000185523.6	297
protein_coding_genes	chr1	gencode::FLVCR1::ENSG00000162769.8	1668
protein_coding_genes	chr1	gencode::VASH2::ENSG00000143494.11	1086
protein_coding_genes	chr1	gencode::ANGEL2::ENSG00000174606.8	1642
protein_coding_genes	chr1	gencode::RPS6KC1::ENSG00000136643.7	3254
protein_coding_genes	chr1	gencode::PROX1::ENSG00000117707.11	2216
protein_coding_genes	chr1	gencode::SMYD2::ENSG00000143499.9	1302
protein_coding_genes	chr1	gencode::PTPN14::ENSG00000152104.7	3564
protein_coding_genes	chr1	gencode::CENPF::ENSG00000117724.8	9345
protein_coding_genes	chr1	gencode::KCNK2::ENSG00000082482.9	1316
protein_coding_genes	chr1	gencode::KCTD3::ENSG00000136636.8	2448
protein_coding_genes	chr1	gencode::USH2A::ENSG00000042781.8	15701
protein_coding_genes	chr1	gencode::ESRRG::ENSG00000196482.12	1469
protein_coding_genes	chr1	gencode::GPATCH2::ENSG00000092978.6	1620
protein_coding_genes	chr1	gencode::SPATA17::ENSG00000162814.6	1086
protein_coding_genes	chr1	gencode::RRP15::ENSG00000067533.5	849
protein_coding_genes	chr1	gencode::TGFB2::ENSG00000092969.7	1329
protein_coding_genes	chr1	gencode::C1orf143::ENSG00000228208.2	312
protein_coding_genes	chr1	gencode::LYPLAL1::ENSG00000143353.7	714
protein_coding_genes	chr1	gencode::SLC30A10::ENSG00000196660.6	1490
protein_coding_genes	chr1	gencode::EPRS::ENSG00000136628.13	4539
protein_coding_genes	chr1	gencode::BPNT1::ENSG00000162813.13	978
protein_coding_genes	chr1	gencode::IARS2::ENSG00000067704.8	3039
protein_coding_genes	chr1	gencode::RAB3GAP2::ENSG00000118873.11	4182
protein_coding_genes	chr1	gencode::AC096644.1::ENSG00000224867.2	153
protein_coding_genes	chr1	gencode::MARK1::ENSG00000116141.11	2388
protein_coding_genes	chr1	gencode::C1orf115::ENSG00000162817.6	429
protein_coding_genes	chr1	gencode::MARC2::ENSG00000117791.11	1032
protein_coding_genes	chr1	gencode::MARC1::ENSG00000186205.8	1014
protein_coding_genes	chr1	gencode::HLX::ENSG00000136630.11	1597
protein_coding_genes	chr1	gencode::DUSP10::ENSG00000143507.13	1449
protein_coding_genes	chr1	gencode::HHIPL2::ENSG00000143512.8	2175
protein_coding_genes	chr1	gencode::TAF1A::ENSG00000143498.13	1395
protein_coding_genes	chr1	gencode::MIA3::ENSG00000154305.12	5865
protein_coding_genes	chr1	gencode::AIDA::ENSG00000186063.8	959
protein_coding_genes	chr1	gencode::BROX::ENSG00000162819.7	1236
protein_coding_genes	chr1	gencode::FAM177B::ENSG00000197520.6	477
protein_coding_genes	chr1	gencode::DISP1::ENSG00000154309.7	4621
protein_coding_genes	chr1	gencode::TLR5::ENSG00000187554.7	2577
protein_coding_genes	chr1	gencode::SUSD4::ENSG00000143502.10	1842
protein_coding_genes	chr1	gencode::C1orf65::ENSG00000178395.5	1872
protein_coding_genes	chr1	gencode::CAPN8::ENSG00000203697.7	2132
protein_coding_genes	chr1	gencode::CAPN2::ENSG00000162909.13	2106
protein_coding_genes	chr1	gencode::TP53BP2::ENSG00000143514.12	3405
protein_coding_genes	chr1	gencode::AC138393.1::ENSG00000269358.1	135
protein_coding_genes	chr1	gencode::FBXO28::ENSG00000143756.7	1107
protein_coding_genes	chr1	gencode::DEGS1::ENSG00000143753.8	972
protein_coding_genes	chr1	gencode::NVL::ENSG00000143748.13	2734
protein_coding_genes	chr1	gencode::CNIH4::ENSG00000143771.7	442
protein_coding_genes	chr1	gencode::WDR26::ENSG00000162923.10	2051
protein_coding_genes	chr1	gencode::CNIH3::ENSG00000143786.3	483
protein_coding_genes	chr1	gencode::DNAH14::ENSG00000185842.10	14488
protein_coding_genes	chr1	gencode::LBR::ENSG00000143815.10	1848
protein_coding_genes	chr1	gencode::AC092811.1::ENSG00000203691.2	348
protein_coding_genes	chr1	gencode::ENAH::ENSG00000154380.12	2517
protein_coding_genes	chr1	gencode::SRP9::ENSG00000143742.8	429
protein_coding_genes	chr1	gencode::EPHX1::ENSG00000143819.8	1368
protein_coding_genes	chr1	gencode::TMEM63A::ENSG00000196187.7	2428
protein_coding_genes	chr1	gencode::LEFTY1::ENSG00000243709.1	1101
protein_coding_genes	chr1	gencode::RP4-559A3.7::ENSG00000255835.1	1080
protein_coding_genes	chr1	gencode::PYCR2::ENSG00000143811.12	963
protein_coding_genes	chr1	gencode::LEFTY2::ENSG00000143768.7	1101
protein_coding_genes	chr1	gencode::SDE2::ENSG00000143751.9	1356
protein_coding_genes	chr1	gencode::H3F3A::ENSG00000163041.5	501
protein_coding_genes	chr1	gencode::ACBD3::ENSG00000182827.8	1587
protein_coding_genes	chr1	gencode::MIXL1::ENSG00000185155.7	723
protein_coding_genes	chr1	gencode::LIN9::ENSG00000183814.11	1681
protein_coding_genes	chr1	gencode::PARP1::ENSG00000143799.8	3268
protein_coding_genes	chr1	gencode::C1orf95::ENSG00000203685.5	435
protein_coding_genes	chr1	gencode::ITPKB::ENSG00000143772.5	2844
protein_coding_genes	chr1	gencode::PSEN2::ENSG00000143801.12	1446
protein_coding_genes	chr1	gencode::ADCK3::ENSG00000163050.12	1944
protein_coding_genes	chr1	gencode::CDC42BPA::ENSG00000143776.14	5490
protein_coding_genes	chr1	gencode::ZNF678::ENSG00000181450.13	1833
protein_coding_genes	chr1	gencode::JMJD4::ENSG00000081692.8	1392
protein_coding_genes	chr1	gencode::SNAP47::ENSG00000143740.10	1488
protein_coding_genes	chr1	gencode::PRSS38::ENSG00000185888.5	981
protein_coding_genes	chr1	gencode::WNT9A::ENSG00000143816.7	1098
protein_coding_genes	chr1	gencode::WNT3A::ENSG00000154342.4	1162
protein_coding_genes	chr1	gencode::ARF1::ENSG00000143761.9	546
protein_coding_genes	chr1	gencode::C1orf35::ENSG00000143793.8	792
protein_coding_genes	chr1	gencode::MRPL55::ENSG00000162910.14	495
protein_coding_genes	chr1	gencode::GUK1::ENSG00000143774.12	975
protein_coding_genes	chr1	gencode::GJC2::ENSG00000198835.3	1320
protein_coding_genes	chr1	gencode::IBA57-AS1::ENSG00000203684.5	333
protein_coding_genes	chr1	gencode::IBA57::ENSG00000181873.8	1071
protein_coding_genes	chr1	gencode::C1orf145::ENSG00000162913.9	342
protein_coding_genes	chr1	gencode::OBSCN::ENSG00000154358.15	27981
protein_coding_genes	chr1	gencode::TRIM11::ENSG00000154370.9	1739
protein_coding_genes	chr1	gencode::TRIM17::ENSG00000162931.7	1583
protein_coding_genes	chr1	gencode::HIST3H3::ENSG00000168148.3	411
protein_coding_genes	chr1	gencode::HIST3H2A::ENSG00000181218.4	393
protein_coding_genes	chr1	gencode::HIST3H2BB::ENSG00000196890.3	381
protein_coding_genes	chr1	gencode::RNF187::ENSG00000168159.9	381
protein_coding_genes	chr1	gencode::RHOU::ENSG00000116574.4	777
protein_coding_genes	chr1	gencode::TMEM78::ENSG00000177800.2	411
protein_coding_genes	chr1	gencode::RAB4A::ENSG00000168118.7	657
protein_coding_genes	chr1	gencode::SPHAR::ENSG00000213029.2	192
protein_coding_genes	chr1	gencode::CCSAP::ENSG00000154429.6	861
protein_coding_genes	chr1	gencode::ACTA1::ENSG00000143632.10	1134
protein_coding_genes	chr1	gencode::NUP133::ENSG00000069248.9	3498
protein_coding_genes	chr1	gencode::ABCB10::ENSG00000135776.4	2217
protein_coding_genes	chr1	gencode::TAF5L::ENSG00000135801.5	1889
protein_coding_genes	chr1	gencode::URB2::ENSG00000135763.5	4575
protein_coding_genes	chr1	gencode::GALNT2::ENSG00000143641.8	1728
protein_coding_genes	chr1	gencode::PGBD5::ENSG00000177614.5	1665
protein_coding_genes	chr1	gencode::COG2::ENSG00000135775.9	2310
protein_coding_genes	chr1	gencode::AGT::ENSG00000135744.7	1458
protein_coding_genes	chr1	gencode::CAPN9::ENSG00000135773.8	2073
protein_coding_genes	chr1	gencode::C1orf198::ENSG00000119280.12	984
protein_coding_genes	chr1	gencode::TTC13::ENSG00000143643.8	2583
protein_coding_genes	chr1	gencode::ARV1::ENSG00000173409.9	816
protein_coding_genes	chr1	gencode::FAM89A::ENSG00000182118.5	555
protein_coding_genes	chr1	gencode::TRIM67::ENSG00000119283.11	2385
protein_coding_genes	chr1	gencode::C1orf131::ENSG00000143633.8	886
protein_coding_genes	chr1	gencode::GNPAT::ENSG00000116906.7	2043
protein_coding_genes	chr1	gencode::EXOC8::ENSG00000116903.6	2178
protein_coding_genes	chr1	gencode::SPRTN::ENSG00000010072.11	1505
protein_coding_genes	chr1	gencode::EGLN1::ENSG00000135766.8	1281
protein_coding_genes	chr1	gencode::TSNAX::ENSG00000116918.9	873
protein_coding_genes	chr1	gencode::DISC1::ENSG00000162946.16	2979
protein_coding_genes	chr1	gencode::SIPA1L2::ENSG00000116991.6	5211
protein_coding_genes	chr1	gencode::MAP10::ENSG00000212916.3	3144
protein_coding_genes	chr1	gencode::NTPCR::ENSG00000135778.7	756
protein_coding_genes	chr1	gencode::PCNXL2::ENSG00000135749.14	6724
protein_coding_genes	chr1	gencode::MLK4::ENSG00000143674.6	3162
protein_coding_genes	chr1	gencode::KCNK1::ENSG00000135750.10	1018
protein_coding_genes	chr1	gencode::SLC35F3::ENSG00000183780.8	1549
protein_coding_genes	chr1	gencode::COA6::ENSG00000168275.10	590
protein_coding_genes	chr1	gencode::TARBP1::ENSG00000059588.5	4866
protein_coding_genes	chr1	gencode::IRF2BP2::ENSG00000168264.6	1764
protein_coding_genes	chr1	gencode::TOMM20::ENSG00000173726.6	438
protein_coding_genes	chr1	gencode::RBM34::ENSG00000188739.10	1293
protein_coding_genes	chr1	gencode::ARID4B::ENSG00000054267.16	3939
protein_coding_genes	chr1	gencode::GGPS1::ENSG00000152904.7	903
protein_coding_genes	chr1	gencode::TBCE::ENSG00000116957.8	1737
protein_coding_genes	chr1	gencode::B3GALNT2::ENSG00000162885.8	1643
protein_coding_genes	chr1	gencode::GNG4::ENSG00000168243.6	228
protein_coding_genes	chr1	gencode::LYST::ENSG00000143669.9	11406
protein_coding_genes	chr1	gencode::NID1::ENSG00000116962.10	3744
protein_coding_genes	chr1	gencode::GPR137B::ENSG00000077585.9	1338
protein_coding_genes	chr1	gencode::ERO1LB::ENSG00000086619.9	1404
protein_coding_genes	chr1	gencode::EDARADD::ENSG00000186197.8	679
protein_coding_genes	chr1	gencode::LGALS8::ENSG00000116977.14	1080
protein_coding_genes	chr1	gencode::HEATR1::ENSG00000119285.6	6439
protein_coding_genes	chr1	gencode::ACTN2::ENSG00000077522.8	2771
protein_coding_genes	chr1	gencode::MTR::ENSG00000116984.8	4201
protein_coding_genes	chr1	gencode::MT1HL1::ENSG00000244020.2	186
protein_coding_genes	chr1	gencode::RYR2::ENSG00000198626.11	15006
protein_coding_genes	chr1	gencode::ZP4::ENSG00000116996.5	1623
protein_coding_genes	chr1	gencode::MTRNR2L11::ENSG00000270188.1	75
protein_coding_genes	chr1	gencode::CHRM3::ENSG00000133019.7	1773
protein_coding_genes	chr1	gencode::FMN2::ENSG00000155816.15	5192
protein_coding_genes	chr1	gencode::AL646016.1::ENSG00000268365.1	69
protein_coding_genes	chr1	gencode::GREM2::ENSG00000180875.4	507
protein_coding_genes	chr1	gencode::RGS7::ENSG00000182901.11	1539
protein_coding_genes	chr1	gencode::FH::ENSG00000091483.6	1533
protein_coding_genes	chr1	gencode::KMO::ENSG00000117009.7	1461
protein_coding_genes	chr1	gencode::OPN3::ENSG00000054277.8	1292
protein_coding_genes	chr1	gencode::CHML::ENSG00000203668.1	1971
protein_coding_genes	chr1	gencode::WDR64::ENSG00000162843.13	3246
protein_coding_genes	chr1	gencode::EXO1::ENSG00000174371.12	2541
protein_coding_genes	chr1	gencode::MAP1LC3C::ENSG00000197769.5	444
protein_coding_genes	chr1	gencode::PLD5::ENSG00000180287.12	1621
protein_coding_genes	chr1	gencode::CEP170::ENSG00000143702.11	4785
protein_coding_genes	chr1	gencode::AC092782.1::ENSG00000269795.1	63
protein_coding_genes	chr1	gencode::SDCCAG8::ENSG00000054282.11	2157
protein_coding_genes	chr1	gencode::AKT3::ENSG00000117020.12	1484
protein_coding_genes	chr1	gencode::ZBTB18::ENSG00000179456.9	1596
protein_coding_genes	chr1	gencode::AL590483.1::ENSG00000268146.1	489
protein_coding_genes	chr1	gencode::C1orf100::ENSG00000173728.6	444
protein_coding_genes	chr1	gencode::ADSS::ENSG00000035687.9	1371
protein_coding_genes	chr1	gencode::C1orf101::ENSG00000179397.13	2856
[truncated: 95,312 more rows]
