# Supplementary material for: Non-coding cancer driver candidates identified with a sample- and position-specific model of the somatic mutation rate
Source: eLife journal article supplement (doi:10.7554/elife.21778), 2017-03-31
Supplement: supp [file elife-21778-supp-v2.zip › elife_poa_e21778_Figure_5_source_data_1.txt]

region_type	id	p
prom	chr10_gencode_A1CF_ENSG00000148584.10	0.681217560096285
prom	chr10_gencode_ABCC2_ENSG00000023839.6	0.19806063750094
prom	chr10_gencode_ABI1_ENSG00000136754.12	0.917036394417789
prom	chr10_gencode_ABLIM1_ENSG00000099204.14	0.874964772423746
prom	chr10_gencode_AC022400.2_ENSG00000267964.1	0.999999999999995
prom	chr10_gencode_AC022532.1_ENSG00000197604.4	0.726357020283741
prom	chr10_gencode_AC069547.1_ENSG00000269165.1	0.433916489638134
prom	chr10_gencode_AC069547.2_ENSG00000269700.1	0.378797892908561
prom	chr10_gencode_ACADSB_ENSG00000196177.8	0.760222454113326
prom	chr10_gencode_ACBD5_ENSG00000107897.14	0.939906961177568
prom	chr10_gencode_ACBD7_ENSG00000176244.6	0.0476543713146764
prom	chr10_gencode_ACSL5_ENSG00000197142.6	0.356247375312542
prom	chr10_gencode_ACTA2_ENSG00000107796.8	0.271586837777348
prom	chr10_gencode_ACTR1A_ENSG00000138107.7	0.0252585774083681
prom	chr10_gencode_ADAM12_ENSG00000148848.10	0.125508499592993
prom	chr10_gencode_ADAM8_ENSG00000151651.11	0.985035522739681
prom	chr10_gencode_ADAMTS14_ENSG00000138316.6	0.970077082370506
prom	chr10_gencode_ADARB2_ENSG00000185736.11	0.2116775961592
prom	chr10_gencode_ADD3_ENSG00000148700.9	0.825132049190151
prom	chr10_gencode_ADIRF_ENSG00000148671.9	0.827871637942019
prom	chr10_gencode_ADK_ENSG00000156110.9	0.931591390699912
prom	chr10_gencode_ADO_ENSG00000181915.3	1
prom	chr10_gencode_ADRA2A_ENSG00000150594.5	0.274508790014605
prom	chr10_gencode_ADRB1_ENSG00000043591.4	0.999999999999946
prom	chr10_gencode_AFAP1L2_ENSG00000169129.10	0.786735435936399
prom	chr10_gencode_AGAP10_ENSG00000204172.7	1
prom	chr10_gencode_AGAP4_ENSG00000188234.9	0.999999999999971
prom	chr10_gencode_AGAP5_ENSG00000172650.8	0.468712291183639
prom	chr10_gencode_AGAP6_ENSG00000204149.5	0.0770062325384012
prom	chr10_gencode_AGAP7_ENSG00000204169.6	0.999999999999931
prom	chr10_gencode_AGAP8_ENSG00000174194.11	1
prom	chr10_gencode_AGAP9_ENSG00000198035.9	1
prom	chr10_gencode_AIFM2_ENSG00000042286.10	0.0705198510371021
prom	chr10_gencode_AKR1C1_ENSG00000187134.8	0.54129558101512
prom	chr10_gencode_AKR1C2_ENSG00000151632.12	0.680675282570336
prom	chr10_gencode_AKR1C3_ENSG00000196139.7	0.0790037873190688
prom	chr10_gencode_AKR1C4_ENSG00000198610.6	0.976769962345479
prom	chr10_gencode_AKR1CL1_ENSG00000196326.6	0.0367532655524826
prom	chr10_gencode_AKR1E2_ENSG00000165568.13	0.384092096809573
prom	chr10_gencode_AL133481.1_ENSG00000235705.4	0.475529541422333
prom	chr10_gencode_AL137026.1_ENSG00000269515.1	0.999999999999995
prom	chr10_gencode_AL138764.1_ENSG00000226209.1	0.362300030249784
prom	chr10_gencode_AL161645.2_ENSG00000268925.1	0.970829821308395
prom	chr10_gencode_AL353583.1_ENSG00000269879.1	0.152703177444918
prom	chr10_gencode_AL355490.1_ENSG00000224474.2	0.720066386260584
prom	chr10_gencode_AL355531.2_ENSG00000268421.1	0.758193067462082
prom	chr10_gencode_AL359195.1_ENSG00000204038.3	0.446943167347448
prom	chr10_gencode_AL359878.1_ENSG00000205740.1	0.978537654153614
prom	chr10_gencode_AL360181.1_ENSG00000268882.1	0.370447135743845
prom	chr10_gencode_AL391421.1_ENSG00000204049.1	0.373685305756579
prom	chr10_gencode_AL450307.1_ENSG00000189275.3	0.723349155252174
prom	chr10_gencode_AL591684.1_ENSG00000215020.3	0.999999999999948
prom	chr10_gencode_AL603965.1_ENSG00000215033.3	0.440187449253017
prom	chr10_gencode_ALDH18A1_ENSG00000059573.4	0.305625584035098
prom	chr10_gencode_ALOX5_ENSG00000012779.6	0.99999999999995
prom	chr10_gencode_ANAPC16_ENSG00000166295.4	0.496900424644941
prom	chr10_gencode_ANK3_ENSG00000151150.16	0.5309497523118
prom	chr10_gencode_ANKRD16_ENSG00000134461.11	3.79318655198621e-05
prom	chr10_gencode_ANKRD1_ENSG00000148677.6	0.591001291261009
prom	chr10_gencode_ANKRD22_ENSG00000152766.5	0.258074367271432
prom	chr10_gencode_ANKRD26_ENSG00000107890.12	0.663980422360598
prom	chr10_gencode_ANKRD2_ENSG00000165887.7	0.791201155343371
prom	chr10_gencode_ANKRD30A_ENSG00000148513.13	0.111182716690194
prom	chr10_gencode_ANTXRL_ENSG00000198250.8	0.999999999999974
prom	chr10_gencode_ANXA11_ENSG00000122359.13	0.997862691524152
prom	chr10_gencode_ANXA7_ENSG00000138279.11	0.645596674703217
prom	chr10_gencode_ANXA8L1_ENSG00000150165.13	1
prom	chr10_gencode_ANXA8L2_ENSG00000186807.9	0.240465758957782
prom	chr10_gencode_ANXA8_ENSG00000165390.11	0.999999999999956
prom	chr10_gencode_AP3M1_ENSG00000185009.8	0.591753407483084
prom	chr10_gencode_APBB1IP_ENSG00000077420.11	0.26767264614518
prom	chr10_gencode_ARHGAP12_ENSG00000165322.13	0.837140477750087
prom	chr10_gencode_ARHGAP19-SLIT1_ENSG00000269891.1	0.611688960388865
prom	chr10_gencode_ARHGAP19_ENSG00000213390.6	0.716121004614513
prom	chr10_gencode_ARHGAP21_ENSG00000107863.12	0.999999999999763
prom	chr10_gencode_ARHGAP22_ENSG00000128805.10	0.925863446970592
prom	chr10_gencode_ARID5B_ENSG00000150347.10	0.508922618597241
prom	chr10_gencode_ARL3_ENSG00000138175.8	0.999999999999996
prom	chr10_gencode_ARL5B_ENSG00000165997.4	0.134236453400178
prom	chr10_gencode_ARMC3_ENSG00000165309.9	0.230252855185269
prom	chr10_gencode_ARMC4_ENSG00000169126.11	0.0685913125075073
prom	chr10_gencode_ARMS2_ENSG00000254636.1	0.475768099410754
prom	chr10_gencode_AS3MT_ENSG00000214435.3	0.944252029577479
prom	chr10_gencode_ASAH2B_ENSG00000204147.5	0.612420118414225
prom	chr10_gencode_ASAH2C_ENSG00000072444.10	0.776281320486373
prom	chr10_gencode_ASAH2_ENSG00000188611.10	0.992852055899629
prom	chr10_gencode_ASB13_ENSG00000196372.8	0.928588952671392
prom	chr10_gencode_ASCC1_ENSG00000138303.13	0.55482470570976
prom	chr10_gencode_ATAD1_ENSG00000138138.9	0.609375081229293
prom	chr10_gencode_ATE1_ENSG00000107669.13	0.957302519079221
prom	chr10_gencode_ATOH7_ENSG00000179774.7	0.498540037029306
prom	chr10_gencode_ATP5C1_ENSG00000165629.15	0.00354059893853849
prom	chr10_gencode_ATRNL1_ENSG00000107518.12	0.663664433377929
prom	chr10_gencode_AVPI1_ENSG00000119986.6	0.609579476702853
prom	chr10_gencode_BAG3_ENSG00000151929.5	0.164193083073001
prom	chr10_gencode_BAMBI_ENSG00000095739.7	0.874699440492517
prom	chr10_gencode_BBIP1_ENSG00000214413.3	0.77010743798496
prom	chr10_gencode_BCCIP_ENSG00000107949.12	0.0241632966925602
prom	chr10_gencode_BEND7_ENSG00000165626.12	0.992211437530701
prom	chr10_gencode_BICC1_ENSG00000122870.7	0.095737526385227
prom	chr10_gencode_BLNK_ENSG00000095585.12	0.810727812090886
prom	chr10_gencode_BLOC1S2_ENSG00000196072.7	1
prom	chr10_gencode_BMI1_ENSG00000168283.9	0.922479554088476
prom	chr10_gencode_BMPR1A_ENSG00000107779.7	0.57117462662144
prom	chr10_gencode_BMS1_ENSG00000165733.7	0.974764240125108
prom	chr10_gencode_BNIP3_ENSG00000176171.7	0.999999999999966
prom	chr10_gencode_BTAF1_ENSG00000095564.9	0.961066247667186
prom	chr10_gencode_BTBD16_ENSG00000138152.7	0.576357852606932
prom	chr10_gencode_BTRC_ENSG00000166167.13	0.18164521969657
prom	chr10_gencode_BUB3_ENSG00000154473.13	0.999999999999988
prom	chr10_gencode_C10orf105_ENSG00000214688.4	0.982145444447518
prom	chr10_gencode_C10orf107_ENSG00000183346.6	0.682923354613121
prom	chr10_gencode_C10orf10_ENSG00000165507.8	0.658086668074727
prom	chr10_gencode_C10orf111_ENSG00000176236.4	0.999999999999986
prom	chr10_gencode_C10orf112_ENSG00000204740.5	0.0391544169866702
prom	chr10_gencode_C10orf113_ENSG00000204683.6	0.0349471008439002
prom	chr10_gencode_C10orf115_ENSG00000204566.6	0.0130503968205762
prom	chr10_gencode_C10orf118_ENSG00000165813.12	0.972945280797184
prom	chr10_gencode_C10orf11_ENSG00000148655.10	0.914067155429176
prom	chr10_gencode_C10orf120_ENSG00000183559.7	0.233494104001351
prom	chr10_gencode_C10orf126_ENSG00000204365.2	0.705822862414661
prom	chr10_gencode_C10orf128_ENSG00000204161.9	0.0211984873873233
prom	chr10_gencode_C10orf129_ENSG00000173124.10	0.408451974451069
prom	chr10_gencode_C10orf12_ENSG00000155640.5	0.0404467872782791
prom	chr10_gencode_C10orf131_ENSG00000173088.8	0.992790285984348
prom	chr10_gencode_C10orf137_ENSG00000107938.13	1
prom	chr10_gencode_C10orf25_ENSG00000165511.4	0.779403888129719
prom	chr10_gencode_C10orf2_ENSG00000107815.3	0.607200070205966
prom	chr10_gencode_C10orf32_ENSG00000166275.11	0.752658113057935
prom	chr10_gencode_C10orf35_ENSG00000171224.7	0.972806634816954
prom	chr10_gencode_C10orf40_ENSG00000235931.2	0.283902241598767
prom	chr10_gencode_C10orf53_ENSG00000178645.8	0.0345058034420909
prom	chr10_gencode_C10orf54_ENSG00000107738.15	0.768272572081268
prom	chr10_gencode_C10orf55_ENSG00000222047.4	0.322043326749344
prom	chr10_gencode_C10orf62_ENSG00000203942.3	0.220527229380127
prom	chr10_gencode_C10orf67_ENSG00000179133.7	0.52601514614039
prom	chr10_gencode_C10orf68_ENSG00000150076.18	0.138177462432267
prom	chr10_gencode_C10orf71_ENSG00000177354.7	0.126614890492595
prom	chr10_gencode_C10orf76_ENSG00000120029.8	0.215754937685588
prom	chr10_gencode_C10orf82_ENSG00000165863.12	0.914585207457964
prom	chr10_gencode_C10orf85_ENSG00000177234.5	0.558833077615129
prom	chr10_gencode_C10orf88_ENSG00000119965.8	0.686628164363032
prom	chr10_gencode_C10orf90_ENSG00000154493.13	0.483440215427227
prom	chr10_gencode_C10orf91_ENSG00000180066.5	0.519675436765155
prom	chr10_gencode_C10orf95_ENSG00000120055.5	0.146217977576076
prom	chr10_gencode_C10orf99_ENSG00000188373.4	0.951390538926656
prom	chr10_gencode_C1QL3_ENSG00000165985.8	0.999999999999965
prom	chr10_gencode_CACNB2_ENSG00000165995.14	0.0949124208823768
prom	chr10_gencode_CACUL1_ENSG00000151893.10	0.961599739771342
prom	chr10_gencode_CALHM1_ENSG00000185933.6	0.240814556601914
prom	chr10_gencode_CALHM2_ENSG00000138172.6	0.800657499353413
prom	chr10_gencode_CALHM3_ENSG00000183128.7	0.428769262017356
prom	chr10_gencode_CALML3_ENSG00000178363.3	0.781561784026336
prom	chr10_gencode_CALML5_ENSG00000178372.6	0.844443877318784
prom	chr10_gencode_CALY_ENSG00000130643.4	0.980358445245179
prom	chr10_gencode_CAMK1D_ENSG00000183049.8	0.922401470833098
prom	chr10_gencode_CAMK2G_ENSG00000148660.16	0.655071980549319
prom	chr10_gencode_CASC10_ENSG00000204682.5	0.12270281741589
prom	chr10_gencode_CASP7_ENSG00000165806.15	0.98231600377122
prom	chr10_gencode_CC2D2B_ENSG00000188649.7	0.933934393787077
prom	chr10_gencode_CCAR1_ENSG00000060339.9	0.873482388268957
prom	chr10_gencode_CCDC147_ENSG00000120051.10	0.482820797060346
prom	chr10_gencode_CCDC172_ENSG00000182645.5	0.988885751817876
prom	chr10_gencode_CCDC3_ENSG00000151468.9	1
prom	chr10_gencode_CCDC6_ENSG00000108091.10	1
prom	chr10_gencode_CCDC7_ENSG00000216937.7	0.664958513985535
prom	chr10_gencode_CCNJ_ENSG00000107443.11	0.938502436015358
prom	chr10_gencode_CCNY_ENSG00000108100.13	0.852465078935543
prom	chr10_gencode_CCSER2_ENSG00000107771.11	0.969612745694278
prom	chr10_gencode_CDC123_ENSG00000151465.9	0.324183282264318
prom	chr10_gencode_CDH23_ENSG00000107736.15	0.875148240961101
prom	chr10_gencode_CDHR1_ENSG00000148600.10	0.922519823052125
prom	chr10_gencode_CDK1_ENSG00000170312.11	0.683500451029414
prom	chr10_gencode_CDNF_ENSG00000185267.5	0.6999468620362
prom	chr10_gencode_CELF2_ENSG00000048740.13	0.998414296722794
prom	chr10_gencode_CEP55_ENSG00000138180.11	0.31078826980984
prom	chr10_gencode_CH25H_ENSG00000138135.5	1
prom	chr10_gencode_CHAT_ENSG00000070748.13	0.461184498656328
prom	chr10_gencode_CHCHD1_ENSG00000172586.7	0.712488984292094
prom	chr10_gencode_CHST15_ENSG00000182022.13	0.946754946899998
prom	chr10_gencode_CHST3_ENSG00000122863.5	0.999999999999888
prom	chr10_gencode_CHUK_ENSG00000213341.6	0.603560648205489
prom	chr10_gencode_CISD1_ENSG00000122873.7	0.465107120796088
prom	chr10_gencode_CLRN3_ENSG00000180745.4	0.194415156214797
prom	chr10_gencode_CNNM1_ENSG00000119946.9	0.371432029680725
prom	chr10_gencode_CNNM2_ENSG00000148842.13	0.606479419169255
prom	chr10_gencode_COL13A1_ENSG00000197467.9	1
prom	chr10_gencode_COL17A1_ENSG00000065618.12	0.617896623017206
prom	chr10_gencode_COMMD3-BMI1_ENSG00000269897.1	0.717668095789731
prom	chr10_gencode_COMMD3_ENSG00000148444.11	0.33472790199688
prom	chr10_gencode_COMTD1_ENSG00000165644.6	0.999999999999916
prom	chr10_gencode_COX15_ENSG00000014919.8	0.319326207890779
prom	chr10_gencode_CPEB3_ENSG00000107864.10	0.969150446161963
prom	chr10_gencode_CPN1_ENSG00000120054.7	0.411820352568064
prom	chr10_gencode_CPXM2_ENSG00000121898.8	0.999999999999972
prom	chr10_gencode_CREM_ENSG00000095794.15	0.144467299055472
prom	chr10_gencode_CRTAC1_ENSG00000095713.9	0.769689593036996
prom	chr10_gencode_CSGALNACT2_ENSG00000169826.6	0.752393552053134
prom	chr10_gencode_CSTF2T_ENSG00000177613.7	0.0831242514801885
prom	chr10_gencode_CTBP2_ENSG00000175029.12	0.963835766000141
prom	chr10_gencode_CTNNA3_ENSG00000183230.12	0.35332194928536
prom	chr10_gencode_CUBN_ENSG00000107611.10	0.031138700020168
prom	chr10_gencode_CUEDC2_ENSG00000107874.6	0.464608317122843
prom	chr10_gencode_CUL2_ENSG00000108094.10	0.922061116580348
prom	chr10_gencode_CUTC_ENSG00000119929.8	0.334033303497096
prom	chr10_gencode_CUZD1_ENSG00000138161.8	0.543317626650015
prom	chr10_gencode_CWF19L1_ENSG00000095485.12	0.741926241991157
prom	chr10_gencode_CXCL12_ENSG00000107562.12	0.913981901575623
prom	chr10_gencode_CYP17A1_ENSG00000148795.5	0.521830303120599
prom	chr10_gencode_CYP26A1_ENSG00000095596.7	0.965388066856724
prom	chr10_gencode_CYP26C1_ENSG00000187553.5	0.414421008110184
prom	chr10_gencode_CYP2C18_ENSG00000108242.8	0.919867079604288
prom	chr10_gencode_CYP2C19_ENSG00000165841.5	0.0184224855888242
prom	chr10_gencode_CYP2C8_ENSG00000138115.9	0.930189305614639
prom	chr10_gencode_CYP2C9_ENSG00000138109.9	0.592438778143533
prom	chr10_gencode_CYP2E1_ENSG00000130649.5	0.436256627812668
prom	chr10_gencode_DCLRE1A_ENSG00000198924.3	0.816330383585131
prom	chr10_gencode_DCLRE1C_ENSG00000152457.13	0.50937630526344
prom	chr10_gencode_DDIT4_ENSG00000168209.4	0.556273951291163
prom	chr10_gencode_DDX21_ENSG00000165732.8	0.762005333488648
prom	chr10_gencode_DDX50_ENSG00000107625.8	0.534942392520081
prom	chr10_gencode_DHTKD1_ENSG00000181192.7	0.154110371087466
prom	chr10_gencode_DHX32_ENSG00000089876.7	0.937363896052977
prom	chr10_gencode_DIP2C_ENSG00000151240.11	0.996266117356013
prom	chr10_gencode_DKFZP667F0711_ENSG00000212743.1	0.0654177691706269
prom	chr10_gencode_DKK1_ENSG00000107984.5	0.590843063919824
prom	chr10_gencode_DLG5_ENSG00000151208.12	0.654441241477539
prom	chr10_gencode_DMBT1_ENSG00000187908.11	0.293731460773483
prom	chr10_gencode_DNA2_ENSG00000138346.10	0.945688939657229
prom	chr10_gencode_DNAJB12_ENSG00000148719.10	0.659661436677122
prom	chr10_gencode_DNAJC12_ENSG00000108176.10	0.625351919719329
prom	chr10_gencode_DNAJC1_ENSG00000136770.6	0.771417395634297
prom	chr10_gencode_DNMBP_ENSG00000107554.11	0.848595630443969
prom	chr10_gencode_DNTT_ENSG00000107447.4	0.949260383377017
prom	chr10_gencode_DOCK1_ENSG00000150760.8	0.997776252075603
prom	chr10_gencode_DPCD_ENSG00000166171.8	0.46608536480339
prom	chr10_gencode_DPYSL4_ENSG00000151640.8	0.684009066340464
prom	chr10_gencode_DRGX_ENSG00000165606.4	0.792094102219181
prom	chr10_gencode_DUPD1_ENSG00000188716.5	0.160615879893486
prom	chr10_gencode_DUSP13_ENSG00000079393.16	0.0901446594429779
prom	chr10_gencode_DUSP5_ENSG00000138166.5	0.999999999999988
prom	chr10_gencode_DYDC1_ENSG00000170788.9	0.664474032528928
prom	chr10_gencode_DYDC2_ENSG00000133665.8	0.745655020750354
prom	chr10_gencode_EBF3_ENSG00000108001.9	0.984801242491889
prom	chr10_gencode_EBLN1_ENSG00000223601.2	0.623053694822956
prom	chr10_gencode_ECD_ENSG00000122882.6	0.242964918566208
prom	chr10_gencode_ECHDC3_ENSG00000134463.10	0.999999999999971
prom	chr10_gencode_ECHS1_ENSG00000127884.4	0.511196578952778
prom	chr10_gencode_EGR2_ENSG00000122877.9	0.996309658956568
prom	chr10_gencode_EIF3A_ENSG00000107581.8	0.827695924557184
prom	chr10_gencode_EIF4EBP2_ENSG00000148730.6	0.520443639384
prom	chr10_gencode_EIF5AL1_ENSG00000253626.2	1
prom	chr10_gencode_ELOVL3_ENSG00000119915.4	0.62950653786879
prom	chr10_gencode_EMX2_ENSG00000170370.10	0.760673551462716
prom	chr10_gencode_ENKUR_ENSG00000151023.12	0.764266746070368
prom	chr10_gencode_ENO4_ENSG00000188316.9	0.569782967440127
prom	chr10_gencode_ENTPD1_ENSG00000138185.12	0.597971982250075
prom	chr10_gencode_ENTPD7_ENSG00000198018.6	0.812957864843976
prom	chr10_gencode_EPC1_ENSG00000120616.11	0.193752060218451
prom	chr10_gencode_ERCC6-PGBD3_ENSG00000258838.1	0.843642384698264
prom	chr10_gencode_ERCC6_ENSG00000225830.6	0.683159110479901
prom	chr10_gencode_EXOC6_ENSG00000138190.12	0.335966956473696
prom	chr10_gencode_EXOSC1_ENSG00000171311.8	1
prom	chr10_gencode_FAM107B_ENSG00000065809.9	0.551381823315353
prom	chr10_gencode_FAM13C_ENSG00000148541.8	1
prom	chr10_gencode_FAM149B1_ENSG00000138286.10	0.239358151477514
prom	chr10_gencode_FAM160B1_ENSG00000151553.10	0.999999999999913
prom	chr10_gencode_FAM170B_ENSG00000172538.6	0.499699073638923
prom	chr10_gencode_FAM171A1_ENSG00000148468.12	0.970996471696478
prom	chr10_gencode_FAM175B_ENSG00000165660.7	0.134184817198324
prom	chr10_gencode_FAM178A_ENSG00000119906.7	0.68486001803142
prom	chr10_gencode_FAM188A_ENSG00000148481.9	0.762646125099014
prom	chr10_gencode_FAM196A_ENSG00000188916.4	0.963541016137477
prom	chr10_gencode_FAM204A_ENSG00000165669.9	0.920571346761599
prom	chr10_gencode_FAM208B_ENSG00000108021.15	0.909069862819503
prom	chr10_gencode_FAM213A_ENSG00000122378.9	0.947431647746848
prom	chr10_gencode_FAM21A_ENSG00000099290.11	0.989379358438691
prom	chr10_gencode_FAM21B_ENSG00000152726.14	1
prom	chr10_gencode_FAM21C_ENSG00000172661.13	0.960453174094119
prom	chr10_gencode_FAM21D_ENSG00000174196.5	0.999999999999968
prom	chr10_gencode_FAM24A_ENSG00000203795.2	0.335183200328713
prom	chr10_gencode_FAM24B_ENSG00000213185.2	0.732768109341633
prom	chr10_gencode_FAM25A_ENSG00000188100.8	0.99999999999985
prom	chr10_gencode_FAM25B_ENSG00000189090.7	1
prom	chr10_gencode_FAM25C_ENSG00000188279.7	0.863560036014282
prom	chr10_gencode_FAM25E_ENSG00000231122.3	0.864172805307951
prom	chr10_gencode_FAM25G_ENSG00000197910.7	1
prom	chr10_gencode_FAM35A_ENSG00000122376.7	0.909346069721958
prom	chr10_gencode_FAM45A_ENSG00000119979.11	0.151098257693743
prom	chr10_gencode_FAM53B_ENSG00000189319.9	0.919434843205839
prom	chr10_gencode_FANK1_ENSG00000203780.6	0.542483781519583
prom	chr10_gencode_FAS_ENSG00000026103.15	0.547369764541767
prom	chr10_gencode_FBXL15_ENSG00000107872.8	0.999999999999986
prom	chr10_gencode_FBXO18_ENSG00000134452.15	0.000176152688891673
prom	chr10_gencode_FBXW4_ENSG00000107829.9	0.824187174464802
prom	chr10_gencode_FFAR4_ENSG00000186188.6	0.363200056913377
prom	chr10_gencode_FGF8_ENSG00000107831.8	1
prom	chr10_gencode_FGFBP3_ENSG00000174721.9	0.640888292906394
prom	chr10_gencode_FGFR2_ENSG00000066468.16	0.500364692366976
prom	chr10_gencode_FOXI2_ENSG00000186766.7	0.971890286519926
prom	chr10_gencode_FRA10AC1_ENSG00000148690.10	0.0796372337984426
prom	chr10_gencode_FRAT1_ENSG00000165879.7	0.999999999999927
prom	chr10_gencode_FRAT2_ENSG00000181274.5	0.722445756723316
prom	chr10_gencode_FRG2B_ENSG00000225899.3	3.42667165588841e-36
prom	chr10_gencode_FRMD4A_ENSG00000151474.15	0.146894740178271
prom	chr10_gencode_FRMPD2_ENSG00000170324.15	0.904097304334704
prom	chr10_gencode_FUOM_ENSG00000148803.7	0.671382578484624
prom	chr10_gencode_FUT11_ENSG00000196968.6	1
prom	chr10_gencode_FXYD4_ENSG00000150201.10	0.756237494242604
prom	chr10_gencode_FZD8_ENSG00000177283.4	0.999999999999981
prom	chr10_gencode_GAD2_ENSG00000136750.7	0.0534437226162155
prom	chr10_gencode_GATA3_ENSG00000107485.11	0.581586041887525
prom	chr10_gencode_GBF1_ENSG00000107862.4	0.639528617108805
prom	chr10_gencode_GDF10_ENSG00000107623.4	0.92760352947023
prom	chr10_gencode_GDF2_ENSG00000128802.3	0.882151275790138
prom	chr10_gencode_GDI2_ENSG00000057608.12	0.245932185100763
prom	chr10_gencode_GFRA1_ENSG00000151892.10	0.171781600434479
prom	chr10_gencode_GHITM_ENSG00000165678.15	0.988141671537312
prom	chr10_gencode_GJD4_ENSG00000177291.3	0.780501584987959
prom	chr10_gencode_GLRX3_ENSG00000108010.7	0.328297261345187
prom	chr10_gencode_GLUD1_ENSG00000148672.7	0.9565765597248
prom	chr10_gencode_GOLGA7B_ENSG00000155265.6	0.766376062229459
prom	chr10_gencode_GOLGA7B_ENSG00000269783.1	0.999999999999997
prom	chr10_gencode_GOT1_ENSG00000120053.9	0.265368773344267
prom	chr10_gencode_GPAM_ENSG00000119927.9	0.948479156988143
prom	chr10_gencode_GPR123_ENSG00000197177.11	0.826578265810626
prom	chr10_gencode_GPR158_ENSG00000151025.9	0.130212841107605
prom	chr10_gencode_GPR26_ENSG00000154478.3	0.860982679325294
prom	chr10_gencode_GPRIN2_ENSG00000204175.4	0.907722332767735
prom	chr10_gencode_GRID1_ENSG00000182771.13	0.694339916802489
prom	chr10_gencode_GRK5_ENSG00000198873.10	0.967850030706435
prom	chr10_gencode_GSTO1_ENSG00000148834.8	0.118731180423917
prom	chr10_gencode_GSTO2_ENSG00000065621.10	0.515262539076432
prom	chr10_gencode_GTPBP4_ENSG00000107937.14	0.935878557866737
prom	chr10_gencode_H2AFY2_ENSG00000099284.9	0.788648101998919
prom	chr10_gencode_HABP2_ENSG00000148702.10	0.984814131092543
prom	chr10_gencode_HECTD2_ENSG00000165338.12	0.966576516034369
prom	chr10_gencode_HELLS_ENSG00000119969.10	0.971839668377606
prom	chr10_gencode_HERC4_ENSG00000148634.11	0.969961857048046
prom	chr10_gencode_HHEX_ENSG00000152804.6	0.463929095143089
prom	chr10_gencode_HIF1AN_ENSG00000166135.9	0.100093227099257
prom	chr10_gencode_HK1_ENSG00000156515.17	0.78883449145006
prom	chr10_gencode_HKDC1_ENSG00000156510.11	0.668111204024722
prom	chr10_gencode_HMX2_ENSG00000188816.3	0.912163999293361
prom	chr10_gencode_HMX3_ENSG00000188620.9	0.745927500023717
prom	chr10_gencode_HNRNPF_ENSG00000169813.12	0.331282520470858
prom	chr10_gencode_HNRNPH3_ENSG00000096746.13	0.238321717140124
prom	chr10_gencode_HOGA1_ENSG00000241935.4	0.552184660820522
prom	chr10_gencode_HPS1_ENSG00000107521.14	0.999999999999967
prom	chr10_gencode_HPS6_ENSG00000166189.6	0.78439966748223
prom	chr10_gencode_HPSE2_ENSG00000172987.8	0.984603177688202
prom	chr10_gencode_HSPA12A_ENSG00000165868.8	1
prom	chr10_gencode_HSPA14_ENSG00000187522.9	0.824394285002375
prom	chr10_gencode_HTR7_ENSG00000148680.11	0.999999999999926
prom	chr10_gencode_HTRA1_ENSG00000166033.7	0.999999999999954
prom	chr10_gencode_HUG1_ENSG00000269259.1	0.424459082446258
prom	chr10_gencode_IDE_ENSG00000119912.11	0.322405448465972
prom	chr10_gencode_IDI1_ENSG00000067064.6	0.999999999999958
prom	chr10_gencode_IDI2_ENSG00000148377.5	0.552032822076098
prom	chr10_gencode_IFIT1B_ENSG00000204010.3	0.648458327938944
prom	chr10_gencode_IFIT1_ENSG00000185745.8	0.160641026394296
prom	chr10_gencode_IFIT2_ENSG00000119922.7	1
prom	chr10_gencode_IFIT3_ENSG00000119917.9	0.977548341677192
prom	chr10_gencode_IFIT5_ENSG00000152778.7	0.46409567131662
prom	chr10_gencode_IKZF5_ENSG00000095574.7	0.75803280814852
prom	chr10_gencode_IL15RA_ENSG00000134470.15	0.983372395111294
prom	chr10_gencode_IL2RA_ENSG00000134460.11	0.140107054778773
prom	chr10_gencode_INA_ENSG00000148798.5	0.0489114420607014
prom	chr10_gencode_INPP5A_ENSG00000068383.14	0.293163017821141
prom	chr10_gencode_INPP5F_ENSG00000198825.7	0.327069266233738
prom	chr10_gencode_IPMK_ENSG00000151151.5	1
prom	chr10_gencode_ITGA8_ENSG00000077943.7	0.815577086984277
prom	chr10_gencode_ITGB1_ENSG00000150093.14	0.86348383105229
prom	chr10_gencode_ITIH2_ENSG00000151655.13	0.867423073948671
prom	chr10_gencode_ITIH5_ENSG00000123243.10	0.456792443185871
prom	chr10_gencode_ITPRIP_ENSG00000148841.11	0.373123760072059
prom	chr10_gencode_JAKMIP3_ENSG00000188385.7	0.424401324779453
prom	chr10_gencode_JMJD1C_ENSG00000171988.13	0.98040447048929
prom	chr10_gencode_KAT6B_ENSG00000156650.8	0.51620329401116
prom	chr10_gencode_KAZALD1_ENSG00000107821.10	0.999999999999943
prom	chr10_gencode_KCNIP2_ENSG00000120049.14	0.410417534142361
prom	chr10_gencode_KCNK18_ENSG00000186795.1	0.0663580297889367
prom	chr10_gencode_KCNMA1_ENSG00000156113.16	1
prom	chr10_gencode_KIAA1217_ENSG00000120549.11	0.243461472013568
prom	chr10_gencode_KIAA1279_ENSG00000198954.4	0.823321710111975
prom	chr10_gencode_KIAA1462_ENSG00000165757.8	0.748755630481146
prom	chr10_gencode_KIAA1598_ENSG00000187164.13	0.592186605368469
prom	chr10_gencode_KIF11_ENSG00000138160.4	0.931634970351387
prom	chr10_gencode_KIF20B_ENSG00000138182.10	0.873023822039678
prom	chr10_gencode_KIF5B_ENSG00000170759.10	1
prom	chr10_gencode_KIN_ENSG00000151657.7	0.0343732531170765
prom	chr10_gencode_KLF6_ENSG00000067082.10	0.106195798417322
prom	chr10_gencode_KNDC1_ENSG00000171798.13	0.917682845920434
prom	chr10_gencode_LARP4B_ENSG00000107929.10	0.717587738011037
prom	chr10_gencode_LBX1_ENSG00000138136.5	0.999999999999993
prom	chr10_gencode_LCOR_ENSG00000196233.7	0.988960185394878
prom	chr10_gencode_LDB1_ENSG00000198728.6	0.672125833055548
prom	chr10_gencode_LDB3_ENSG00000122367.15	0.0743639104231556
prom	chr10_gencode_LGI1_ENSG00000108231.7	0.681863875240413
prom	chr10_gencode_LHPP_ENSG00000107902.9	0.145566446639427
prom	chr10_gencode_LINC00999_ENSG00000225119.3	0.999999999999914
prom	chr10_gencode_LIPA_ENSG00000107798.13	0.241557397008953
prom	chr10_gencode_LIPF_ENSG00000182333.10	0.108112074507674
prom	chr10_gencode_LIPJ_ENSG00000204022.5	0.903312037074344
prom	chr10_gencode_LIPK_ENSG00000204021.3	0.272580448553032
prom	chr10_gencode_LIPM_ENSG00000173239.9	0.394245915153584
prom	chr10_gencode_LIPN_ENSG00000204020.5	0.161777093851447
prom	chr10_gencode_LOXL4_ENSG00000138131.3	0.910082674881906
prom	chr10_gencode_LRIT1_ENSG00000148602.5	0.191333684788697
prom	chr10_gencode_LRIT2_ENSG00000204033.5	0.233944529760233
prom	chr10_gencode_LRRC18_ENSG00000165383.6	0.419903772046725
prom	chr10_gencode_LRRC20_ENSG00000172731.9	0.690750595835727
prom	chr10_gencode_LRRC27_ENSG00000148814.13	0.251714887108323
prom	chr10_gencode_LRRTM3_ENSG00000198739.6	0.840153555477501
prom	chr10_gencode_LYZL1_ENSG00000120563.4	0.768097995306254
prom	chr10_gencode_LYZL2_ENSG00000151033.7	0.323910213824821
prom	chr10_gencode_LZTS2_ENSG00000107816.13	0.631041544378495
prom	chr10_gencode_MAP3K8_ENSG00000107968.5	0.749049222508191
prom	chr10_gencode_MAPK8_ENSG00000107643.11	0.934262402897506
prom	chr10_gencode_MARCH5_ENSG00000198060.5	0.734229021367233
prom	chr10_gencode_MARCH8_ENSG00000165406.11	0.230623183757138
prom	chr10_gencode_MARVELD1_ENSG00000155254.8	0.457243193101416
prom	chr10_gencode_MASTL_ENSG00000120539.10	0.999999999999977
prom	chr10_gencode_MAT1A_ENSG00000151224.8	0.349595910276698
prom	chr10_gencode_MBL2_ENSG00000165471.6	0.0298213342312459
prom	chr10_gencode_MCM10_ENSG00000065328.12	0.807387038619602
prom	chr10_gencode_MCMBP_ENSG00000197771.8	1
prom	chr10_gencode_MCU_ENSG00000156026.10	1
prom	chr10_gencode_MEIG1_ENSG00000197889.5	0.75062885196621
prom	chr10_gencode_METTL10_ENSG00000203791.9	0.600985156215433
prom	chr10_gencode_MGEA5_ENSG00000198408.9	0.298557050742282
prom	chr10_gencode_MGMT_ENSG00000170430.9	0.995462482072896
prom	chr10_gencode_MICU1_ENSG00000107745.12	0.788374913901454
prom	chr10_gencode_MINPP1_ENSG00000107789.11	0.117402342053901
prom	chr10_gencode_MKI67_ENSG00000148773.8	0.98036058725297
prom	chr10_gencode_MKX_ENSG00000150051.9	0.734773793131893
prom	chr10_gencode_MLLT10_ENSG00000078403.12	0.960146935188529
prom	chr10_gencode_MMP21_ENSG00000154485.4	0.759619704873066
prom	chr10_gencode_MMRN2_ENSG00000173269.9	0.467330634046964
prom	chr10_gencode_MMS19_ENSG00000155229.16	1
prom	chr10_gencode_MORN4_ENSG00000171160.13	0.673906229757362
prom	chr10_gencode_MPP7_ENSG00000150054.14	0.582710392732406
prom	chr10_gencode_MRC1L1_ENSG00000183748.4	1
prom	chr10_gencode_MRC1_ENSG00000120586.4	0.999999999999982
prom	chr10_gencode_MRPL43_ENSG00000055950.12	0.193775869765965
prom	chr10_gencode_MRPS16_ENSG00000182180.9	0.99999999999994
prom	chr10_gencode_MSMB_ENSG00000138294.9	0.318974960062496
prom	chr10_gencode_MSRB2_ENSG00000148450.8	0.999999999999975
prom	chr10_gencode_MSS51_ENSG00000166343.5	0.265299185644847
prom	chr10_gencode_MTG1_ENSG00000148824.14	0.525501055284898
prom	chr10_gencode_MTPAP_ENSG00000107951.8	0.863009588866504
prom	chr10_gencode_MTRNR2L5_ENSG00000249860.2	0.0256161964227836
prom	chr10_gencode_MTRNR2L7_ENSG00000256892.1	0.553838453705872
prom	chr10_gencode_MXI1_ENSG00000119950.16	0.99546850588124
prom	chr10_gencode_MYO3A_ENSG00000095777.10	0.811149118826371
prom	chr10_gencode_MYOF_ENSG00000138119.12	0.272911312463456
prom	chr10_gencode_MYOZ1_ENSG00000177791.11	0.456033232364626
prom	chr10_gencode_MYPN_ENSG00000138347.11	0.952651273883187
prom	chr10_gencode_NAMPTL_ENSG00000229644.4	0.396798591552289
prom	chr10_gencode_NANOS1_ENSG00000188613.5	0.738693637486546
prom	chr10_gencode_NCOA4_ENSG00000138293.15	0.530308682402986
prom	chr10_gencode_NDST2_ENSG00000166507.12	0.206342082667206
prom	chr10_gencode_NDUFB8_ENSG00000166136.11	0.907024838690885
prom	chr10_gencode_NEBL_ENSG00000078114.14	0.81089252701802
prom	chr10_gencode_NET1_ENSG00000173848.14	0.200270117713552
prom	chr10_gencode_NEURL_ENSG00000107954.6	0.903082833882868
prom	chr10_gencode_NEUROG3_ENSG00000122859.4	0.973349641910051
prom	chr10_gencode_NFKB2_ENSG00000077150.13	0.533482389368527
prom	chr10_gencode_NHLRC2_ENSG00000196865.4	0.856160052785723
prom	chr10_gencode_NKX1-2_ENSG00000229544.6	0.960612790616147
prom	chr10_gencode_NKX2-3_ENSG00000119919.9	0.721412429606344
prom	chr10_gencode_NKX6-2_ENSG00000148826.6	1
prom	chr10_gencode_NMT2_ENSG00000152465.13	0.983776757308945
prom	chr10_gencode_NOC3L_ENSG00000173145.7	0.44223371540288
prom	chr10_gencode_NODAL_ENSG00000156574.5	0.531235008199002
prom	chr10_gencode_NOLC1_ENSG00000166197.12	0.877780364082005
prom	chr10_gencode_NPFFR1_ENSG00000148734.7	0.99999999999997
prom	chr10_gencode_NPM3_ENSG00000107833.6	0.499290986070646
prom	chr10_gencode_NPS_ENSG00000214285.1	0.64433279708419
prom	chr10_gencode_NPY4R_ENSG00000204174.2	0.00206688340331462
prom	chr10_gencode_NRAP_ENSG00000197893.9	0.652523062315083
prom	chr10_gencode_NRBF2_ENSG00000148572.10	0.330539759828182
prom	chr10_gencode_NRG3_ENSG00000185737.8	0.545835856816068
prom	chr10_gencode_NRP1_ENSG00000099250.13	0.999858714235082
prom	chr10_gencode_NSMCE4A_ENSG00000107672.10	0.908297983552814
prom	chr10_gencode_NSUN6_ENSG00000241058.1	0.41882954249098
prom	chr10_gencode_NT5C2_ENSG00000076685.14	0.862974388787629
prom	chr10_gencode_NUDT13_ENSG00000166321.9	0.599228901211801
prom	chr10_gencode_NUDT5_ENSG00000165609.8	0.373137124312279
prom	chr10_gencode_NUTM2A_ENSG00000184923.8	1
prom	chr10_gencode_NUTM2B_ENSG00000188199.6	0.414559436462452
prom	chr10_gencode_NUTM2D_ENSG00000214562.9	0.854033350763718
prom	chr10_gencode_NUTM2E_ENSG00000228570.3	0.999999999999969
prom	chr10_gencode_OAT_ENSG00000065154.7	0.553986427762571
prom	chr10_gencode_OBFC1_ENSG00000107960.6	0.168361013264248
prom	chr10_gencode_OGDHL_ENSG00000197444.5	0.704492015088268
prom	chr10_gencode_OIT3_ENSG00000138315.8	0.518933280690752
prom	chr10_gencode_OLAH_ENSG00000152463.10	0.220635719622603
prom	chr10_gencode_OPALIN_ENSG00000197430.6	0.76775414018468
prom	chr10_gencode_OPN4_ENSG00000122375.7	0.728947444181986
prom	chr10_gencode_OPTN_ENSG00000123240.12	0.638279694710516
prom	chr10_gencode_OR13A1_ENSG00000256574.2	0.204216089429704
prom	chr10_gencode_OTUD1_ENSG00000165312.5	0.54338598244635
prom	chr10_gencode_P4HA1_ENSG00000122884.8	0.862793463801534
prom	chr10_gencode_PALD1_ENSG00000107719.8	0.867009634886116
prom	chr10_gencode_PANK1_ENSG00000152782.12	0.697026840628429
prom	chr10_gencode_PAOX_ENSG00000148832.10	0.894093211520548
prom	chr10_gencode_PAPSS2_ENSG00000198682.8	0.234109722018008
prom	chr10_gencode_PARD3_ENSG00000148498.11	0.81325965763471
prom	chr10_gencode_PARG_ENSG00000227345.4	0.0682070729437779
prom	chr10_gencode_PAX2_ENSG00000075891.17	0.999999999999985
prom	chr10_gencode_PBLD_ENSG00000108187.11	0.148925730591205
prom	chr10_gencode_PCBD1_ENSG00000166228.4	0.999999999999938
prom	chr10_gencode_PCDH15_ENSG00000150275.13	0.0491926310823946
prom	chr10_gencode_PCGF5_ENSG00000180628.10	0.901427512019722
prom	chr10_gencode_PCGF6_ENSG00000156374.10	0.541680208533551
prom	chr10_gencode_PDCD11_ENSG00000148843.9	0.00055289133435226
prom	chr10_gencode_PDCD4_ENSG00000150593.11	0.939026178146292
prom	chr10_gencode_PDE6C_ENSG00000095464.9	0.10702872868354
prom	chr10_gencode_PDLIM1_ENSG00000107438.4	0.910786824516598
prom	chr10_gencode_PDSS1_ENSG00000148459.11	0.467441370675087
prom	chr10_gencode_PDZD7_ENSG00000186862.13	0.999999999999961
prom	chr10_gencode_PDZD8_ENSG00000165650.7	0.933582916825954
prom	chr10_gencode_PFKFB3_ENSG00000170525.14	0.456130992343356
prom	chr10_gencode_PFKP_ENSG00000067057.12	0.908495213201972
prom	chr10_gencode_PGAM1_ENSG00000171314.8	0.705409926698631
prom	chr10_gencode_PGBD3_ENSG00000243251.4	0.45045115390983
prom	chr10_gencode_PHYHIPL_ENSG00000165443.7	0.996800811795037
prom	chr10_gencode_PHYH_ENSG00000107537.9	0.955938214726093
prom	chr10_gencode_PI4K2A_ENSG00000155252.12	0.729720655633463
prom	chr10_gencode_PI4K2A_ENSG00000249967.1	0.552184660820522
prom	chr10_gencode_PIK3AP1_ENSG00000155629.10	0.38585371846762
prom	chr10_gencode_PIP4K2A_ENSG00000150867.9	0.84747457071886
prom	chr10_gencode_PITRM1_ENSG00000107959.11	0.585111950992965
prom	chr10_gencode_PITX3_ENSG00000107859.5	0.6912997080384
prom	chr10_gencode_PKD2L1_ENSG00000107593.15	0.552161223209987
prom	chr10_gencode_PLA2G12B_ENSG00000138308.5	0.745675037931995
prom	chr10_gencode_PLAC9_ENSG00000189129.9	0.818640151125377
prom	chr10_gencode_PLCE1_ENSG00000138193.10	0.991541848792431
prom	chr10_gencode_PLEKHA1_ENSG00000107679.10	0.83702516129278
prom	chr10_gencode_PLEKHS1_ENSG00000148735.10	6.12974471376855e-08
prom	chr10_gencode_PLXDC2_ENSG00000120594.12	0.999999999999978
prom	chr10_gencode_PNLIPRP1_ENSG00000187021.10	0.835457234949358
prom	chr10_gencode_PNLIPRP2_ENSG00000165862.10	0.0821613327459065
prom	chr10_gencode_PNLIPRP3_ENSG00000203837.4	0.825069598935572
prom	chr10_gencode_PNLIP_ENSG00000175535.6	0.338950299440806
prom	chr10_gencode_POLL_ENSG00000166169.12	0.601116092101692
prom	chr10_gencode_POLR3A_ENSG00000148606.8	0.148752957989031
prom	chr10_gencode_PPA1_ENSG00000180817.7	0.605530161322126
prom	chr10_gencode_PPAPDC1A_ENSG00000203805.6	0.560584993605226
prom	chr10_gencode_PPIF_ENSG00000108179.9	0.670430914125525
prom	chr10_gencode_PPP1R3C_ENSG00000119938.8	0.557492061277924
prom	chr10_gencode_PPP2R2D_ENSG00000175470.14	0.0993675452602028
prom	chr10_gencode_PPP3CB_ENSG00000107758.11	0.858696413387012
prom	chr10_gencode_PPRC1_ENSG00000148840.6	0.693921879124705
prom	chr10_gencode_PRAP1_ENSG00000165828.9	0.0858343617855215
prom	chr10_gencode_PRDX3_ENSG00000165672.5	0.769448389992517
prom	chr10_gencode_PRF1_ENSG00000180644.6	0.458934260967233
prom	chr10_gencode_PRKCQ_ENSG00000065675.10	0.764753503774453
prom	chr10_gencode_PRKG1_ENSG00000185532.10	0.0770353305099218
prom	chr10_gencode_PRLHR_ENSG00000119973.3	0.854387232645437
prom	chr10_gencode_PROSER2_ENSG00000148426.8	0.650392913132436
prom	chr10_gencode_PRPF18_ENSG00000165630.9	0.871743483657945
prom	chr10_gencode_PRR26_ENSG00000180525.9	0.44743185209198
prom	chr10_gencode_PRTFDC1_ENSG00000099256.14	0.89749225930279
prom	chr10_gencode_PSAP_ENSG00000197746.9	0.592153287497749
prom	chr10_gencode_PSD_ENSG00000059915.12	0.999999999999897
prom	chr10_gencode_PSTK_ENSG00000179988.9	0.492434542435612
prom	chr10_gencode_PTCHD3_ENSG00000182077.6	0.44093947087348
prom	chr10_gencode_PTER_ENSG00000165983.10	0.62728397065318
prom	chr10_gencode_PTF1A_ENSG00000168267.5	0.904626950947104
prom	chr10_gencode_PTPLA_ENSG00000165996.9	0.827856680830953
prom	chr10_gencode_PTPN20A_ENSG00000204179.6	1
prom	chr10_gencode_PTPN20B_ENSG00000183675.10	0.97462796078397
prom	chr10_gencode_PTPRE_ENSG00000132334.12	0.918320990659117
prom	chr10_gencode_PWWP2B_ENSG00000171813.10	0.999999999999976
prom	chr10_gencode_PYROXD2_ENSG00000119943.6	0.86950910646975
prom	chr10_gencode_R3HCC1L_ENSG00000166024.9	0.447807582138462
prom	chr10_gencode_RAB11FIP2_ENSG00000107560.6	0.988389592416186
prom	chr10_gencode_RAB18_ENSG00000099246.12	0.887323286142795
prom	chr10_gencode_RASGEF1A_ENSG00000198915.7	0.99963528695409
prom	chr10_gencode_RASSF4_ENSG00000107551.16	0.882991776542643
prom	chr10_gencode_RBM17_ENSG00000134453.11	0.210454004174824
prom	chr10_gencode_RBM20_ENSG00000203867.7	0.951413012432222
prom	chr10_gencode_RBP3_ENSG00000107618.4	0.11345194468582
prom	chr10_gencode_RBP4_ENSG00000138207.8	0.915724466418512
prom	chr10_gencode_REEP3_ENSG00000165476.8	0.999999999999982
prom	chr10_gencode_RET_ENSG00000165731.13	0.960587102295543
prom	chr10_gencode_RGR_ENSG00000148604.9	0.947167646227229
prom	chr10_gencode_RGS10_ENSG00000148908.10	0.96073461825304
prom	chr10_gencode_RHOBTB1_ENSG00000072422.12	0.986125044205302
prom	chr10_gencode_RNLS_ENSG00000184719.7	0.540750240172183
prom	chr10_gencode_RP11-108K14.8_ENSG00000254536.1	0.230295199496879
prom	chr10_gencode_RP11-139J15.7_ENSG00000271786.1	0.398702942962382
prom	chr10_gencode_RP11-242G20.1_ENSG00000235645.2	0.999999999999923
prom	chr10_gencode_RP11-248J23.6_ENSG00000269948.1	0.873633151643476
prom	chr10_gencode_RP11-332O19.5_ENSG00000235376.5	0.669668573914771
prom	chr10_gencode_RP11-451M19.3_ENSG00000203876.5	0.158647638082249
prom	chr10_gencode_RPP30_ENSG00000148688.9	0.93550411892162
prom	chr10_gencode_RPP38_ENSG00000152464.10	0.999999999999991
prom	chr10_gencode_RPS24_ENSG00000138326.14	0.925209253167717
prom	chr10_gencode_RRP12_ENSG00000052749.9	0.174465509193179
prom	chr10_gencode_RSU1_ENSG00000148484.13	0.166522372550653
prom	chr10_gencode_RTKN2_ENSG00000182010.6	0.970504236910204
prom	chr10_gencode_RUFY2_ENSG00000204130.8	0.798501350050562
prom	chr10_gencode_SAMD8_ENSG00000156671.8	0.816585801726939
prom	chr10_gencode_SAR1A_ENSG00000079332.10	0.91022966270466
prom	chr10_gencode_SCD_ENSG00000099194.5	1
prom	chr10_gencode_SEC23IP_ENSG00000107651.8	0.0689172075697252
prom	chr10_gencode_SEC24C_ENSG00000176986.10	0.778843062827341
prom	chr10_gencode_SEC31B_ENSG00000075826.12	0.775666222660432
prom	chr10_gencode_SEC61A2_ENSG00000065665.16	0.999999999999989
prom	chr10_gencode_SEMA4G_ENSG00000095539.11	0.721174300645926
prom	chr10_gencode_SEPHS1_ENSG00000086475.10	0.999999999999833
prom	chr10_gencode_SFMBT2_ENSG00000198879.7	0.831523716114157
prom	chr10_gencode_SFR1_ENSG00000156384.10	0.661038640435552
prom	chr10_gencode_SFRP5_ENSG00000120057.4	0.308431863199207
prom	chr10_gencode_SFTPA1_ENSG00000122852.10	0.652114852313549
prom	chr10_gencode_SFTPA2_ENSG00000185303.11	0.375370177078267
prom	chr10_gencode_SFTPD_ENSG00000133661.11	0.59468726807978
prom	chr10_gencode_SFXN2_ENSG00000156398.8	0.999999999999965
prom	chr10_gencode_SFXN3_ENSG00000107819.9	0.999999999999918
prom	chr10_gencode_SFXN4_ENSG00000183605.12	0.918709066443444
prom	chr10_gencode_SGMS1_ENSG00000198964.9	0.979394080758344
prom	chr10_gencode_SGPL1_ENSG00000166224.12	0.961149471191275
prom	chr10_gencode_SH2D4B_ENSG00000178217.9	0.983612120602074
prom	chr10_gencode_SH3PXD2A_ENSG00000107957.12	0.960915733935322
prom	chr10_gencode_SHOC2_ENSG00000108061.7	0.732988708896421
prom	chr10_gencode_SIRT1_ENSG00000096717.7	0.409236798042825
prom	chr10_gencode_SKIDA1_ENSG00000180592.12	0.43010043005704
prom	chr10_gencode_SLC16A12_ENSG00000152779.12	0.91740154406815
prom	chr10_gencode_SLC16A9_ENSG00000165449.7	0.927922012369959
prom	chr10_gencode_SLC18A2_ENSG00000165646.7	0.657120618363228
prom	chr10_gencode_SLC18A3_ENSG00000187714.5	1
prom	chr10_gencode_SLC25A16_ENSG00000122912.10	0.680726323616672
prom	chr10_gencode_SLC25A28_ENSG00000155287.6	0.152854808689265
prom	chr10_gencode_SLC29A3_ENSG00000198246.7	0.935641165020068
prom	chr10_gencode_SLC35G1_ENSG00000176273.10	0.226292583053463
prom	chr10_gencode_SLC39A12_ENSG00000148482.7	0.290744865277326
prom	chr10_gencode_SLIT1_ENSG00000187122.12	0.969548534793255
prom	chr10_gencode_SLK_ENSG00000065613.9	1
prom	chr10_gencode_SMC3_ENSG00000108055.9	0.6985085741696
prom	chr10_gencode_SMNDC1_ENSG00000119953.8	0.789455427129081
prom	chr10_gencode_SNCG_ENSG00000173267.9	0.652612018869475
prom	chr10_gencode_SORBS1_ENSG00000095637.16	0.943364688760156
prom	chr10_gencode_SORCS1_ENSG00000108018.11	0.962805121793987
prom	chr10_gencode_SORCS3_ENSG00000156395.8	0.816097047928146
prom	chr10_gencode_SPAG6_ENSG00000077327.11	0.73821627826656
prom	chr10_gencode_SPOCK2_ENSG00000107742.8	0.562200332658889
prom	chr10_gencode_SPRN_ENSG00000203772.6	0.995520868216017
prom	chr10_gencode_SRGN_ENSG00000122862.4	0.566811804778776
prom	chr10_gencode_ST8SIA6_ENSG00000148488.11	1
prom	chr10_gencode_STAMBPL1_ENSG00000138134.7	0.200681563037536
prom	chr10_gencode_STAM_ENSG00000136738.10	0.687545900655139
prom	chr10_gencode_STK32C_ENSG00000165752.12	0.987823899469906
prom	chr10_gencode_STOX1_ENSG00000165730.10	0.821599885334205
prom	chr10_gencode_SUFU_ENSG00000107882.7	0.42651631823557
prom	chr10_gencode_SUPV3L1_ENSG00000156502.9	0.525796331205124
prom	chr10_gencode_SUV39H2_ENSG00000152455.11	0.598229260071362
prom	chr10_gencode_SVIL_ENSG00000197321.10	0.993094236321594
prom	chr10_gencode_SYCE1_ENSG00000171772.11	0.485329750140296
prom	chr10_gencode_SYNPO2L_ENSG00000166317.7	0.0108673795155897
prom	chr10_gencode_SYT15_ENSG00000204176.9	0.457057912046274
prom	chr10_gencode_TACC2_ENSG00000138162.13	0.140860006738585
prom	chr10_gencode_TACR2_ENSG00000075073.10	0.683627686878657
prom	chr10_gencode_TAF3_ENSG00000165632.7	0.837878836684885
prom	chr10_gencode_TAF5_ENSG00000148835.9	0.798905859080623
prom	chr10_gencode_TBATA_ENSG00000166220.8	0.937157852364884
prom	chr10_gencode_TBC1D12_ENSG00000108239.8	1
prom	chr10_gencode_TCERG1L_ENSG00000176769.9	1
prom	chr10_gencode_TCF7L2_ENSG00000148737.11	0.134287660398743
prom	chr10_gencode_TCTN3_ENSG00000119977.16	0.00306309141526406
prom	chr10_gencode_TDRD1_ENSG00000095627.5	0.502760349353324
prom	chr10_gencode_TECTB_ENSG00000119913.4	0.713949579555909
prom	chr10_gencode_TET1_ENSG00000138336.8	0.805214667470309
prom	chr10_gencode_TEX36_ENSG00000175018.8	0.770986592486931
prom	chr10_gencode_TFAM_ENSG00000108064.6	0.686593630538718
prom	chr10_gencode_THNSL1_ENSG00000185875.8	0.754070598790589
prom	chr10_gencode_TIAL1_ENSG00000151923.13	0.676137731299304
prom	chr10_gencode_TIMM23B_ENSG00000204152.6	0.999999999999949
prom	chr10_gencode_TIMM23_ENSG00000138297.9	0.955739315148867
prom	chr10_gencode_TLL2_ENSG00000095587.8	0.888979069606409
prom	chr10_gencode_TLX1_ENSG00000107807.8	1
prom	chr10_gencode_TM9SF3_ENSG00000077147.10	0.908742722097871
prom	chr10_gencode_TMEM180_ENSG00000138111.10	0.9145902166385
prom	chr10_gencode_TMEM236_ENSG00000148483.7	1
prom	chr10_gencode_TMEM236_ENSG00000184040.7	1
prom	chr10_gencode_TMEM254_ENSG00000133678.9	0.999999999999936
prom	chr10_gencode_TMEM26_ENSG00000196932.7	0.78935820979472
prom	chr10_gencode_TMEM72_ENSG00000187783.7	0.958686266114001
prom	chr10_gencode_TNKS2_ENSG00000107854.5	0.572913365962992
prom	chr10_gencode_TRDMT1_ENSG00000107614.17	0.952368937025911
prom	chr10_gencode_TRIM8_ENSG00000171206.9	1
prom	chr10_gencode_TRUB1_ENSG00000165832.4	0.268109701770897
prom	chr10_gencode_TSPAN14_ENSG00000108219.10	0.990675253721232
prom	chr10_gencode_TSPAN15_ENSG00000099282.5	0.886336045776485
prom	chr10_gencode_TTC18_ENSG00000156042.13	0.543397095202625
prom	chr10_gencode_TTC40_ENSG00000171811.8	0.431384639644576
prom	chr10_gencode_TUBAL3_ENSG00000178462.7	0.848850419921515
prom	chr10_gencode_TUBB8_ENSG00000173876.9	0.0261243917960614
prom	chr10_gencode_TUBGCP2_ENSG00000130640.9	0.0361603413954983
prom	chr10_gencode_TYSND1_ENSG00000156521.9	0.824392078022603
prom	chr10_gencode_UBE2D1_ENSG00000072401.10	0.135097457123449
prom	chr10_gencode_UBTD1_ENSG00000165886.4	1
prom	chr10_gencode_UCMA_ENSG00000165623.5	0.763529024971809
prom	chr10_gencode_UCN3_ENSG00000178473.5	0.913387149693028
prom	chr10_gencode_UNC5B_ENSG00000107731.8	0.988706729122208
prom	chr10_gencode_UPF2_ENSG00000151461.15	0.101869648205777
prom	chr10_gencode_UROS_ENSG00000188690.8	0.51124800628044
prom	chr10_gencode_USMG5_ENSG00000173915.8	0.00119148496869926
prom	chr10_gencode_USP54_ENSG00000166348.13	0.992338907260874
prom	chr10_gencode_USP6NL_ENSG00000148429.10	0.73563047777226
prom	chr10_gencode_UTF1_ENSG00000171794.3	0.999999999999878
prom	chr10_gencode_VAX1_ENSG00000148704.8	0.968181500393198
prom	chr10_gencode_VCL_ENSG00000035403.12	0.353187277438258
prom	chr10_gencode_VDAC2_ENSG00000165637.9	0.999999999999896
prom	chr10_gencode_VENTX_ENSG00000151650.7	0.752772611183445
prom	chr10_gencode_VIM_ENSG00000026025.9	0.939824759445475
prom	chr10_gencode_VPS26A_ENSG00000122958.10	0.475529813176299
prom	chr10_gencode_VSTM4_ENSG00000165633.8	0.910232602348522
prom	chr10_gencode_VTI1A_ENSG00000151532.9	0.887511211451821
prom	chr10_gencode_VWA2_ENSG00000165816.8	0.650564091708442
prom	chr10_gencode_WAC_ENSG00000095787.17	0.99999999999996
prom	chr10_gencode_WAPAL_ENSG00000062650.13	0.43975069817963
prom	chr10_gencode_WBP1L_ENSG00000166272.12	0.123934002247843
prom	chr10_gencode_WDFY4_ENSG00000128815.13	0.220680639123083
prom	chr10_gencode_WDR11_ENSG00000120008.11	0.247506636910008
prom	chr10_gencode_WDR37_ENSG00000047056.10	0.999323965906645
prom	chr10_gencode_WDR96_ENSG00000197748.8	0.909258757596401
prom	chr10_gencode_WNT8B_ENSG00000075290.7	0.195413706504873
prom	chr10_gencode_XPNPEP1_ENSG00000108039.13	0.786692112418048
prom	chr10_gencode_YME1L1_ENSG00000136758.14	0.712665151196556
prom	chr10_gencode_ZCCHC24_ENSG00000165424.6	0.850263961152328
prom	chr10_gencode_ZDHHC16_ENSG00000171307.14	0.99999999999993
prom	chr10_gencode_ZDHHC6_ENSG00000023041.7	0.875155220917789
prom	chr10_gencode_ZEB1_ENSG00000148516.17	0.993847572820886
prom	chr10_gencode_ZFAND4_ENSG00000172671.15	1
prom	chr10_gencode_ZFYVE27_ENSG00000155256.13	0.444237309841323
prom	chr10_gencode_ZMIZ1_ENSG00000108175.12	0.867486733135705
prom	chr10_gencode_ZMYND11_ENSG00000015171.14	0.91717969535822
prom	chr10_gencode_ZNF22_ENSG00000165512.4	0.999999999999981
prom	chr10_gencode_ZNF239_ENSG00000196793.9	0.996293897735873
prom	chr10_gencode_ZNF248_ENSG00000198105.7	0.988199654608887
prom	chr10_gencode_ZNF25_ENSG00000175395.11	0.827882179206222
prom	chr10_gencode_ZNF32_ENSG00000169740.9	0.840515017777596
prom	chr10_gencode_ZNF33A_ENSG00000189180.11	0.996857176159328
prom	chr10_gencode_ZNF33B_ENSG00000196693.10	0.856152786333792
prom	chr10_gencode_ZNF365_ENSG00000138311.11	0.430606901470029
prom	chr10_gencode_ZNF37A_ENSG00000075407.13	0.571502087618958
prom	chr10_gencode_ZNF438_ENSG00000183621.11	0.982216336574478
prom	chr10_gencode_ZNF485_ENSG00000198298.8	0.895583613495943
prom	chr10_gencode_ZNF487_ENSG00000243660.5	0.999999999999835
prom	chr10_gencode_ZNF488_ENSG00000165388.8	0.845869700288887
prom	chr10_gencode_ZNF503_ENSG00000165655.14	1
prom	chr10_gencode_ZNF511_ENSG00000198546.10	0.633076058514485
prom	chr10_gencode_ZRANB1_ENSG00000019995.6	0.323284332226013
prom	chr10_gencode_ZSWIM8_ENSG00000214655.6	0.497587368052
prom	chr10_gencode_ZWINT_ENSG00000122952.12	0.0178514647475502
prom	chr11_gencode_AAMDC_ENSG00000087884.10	0.694678005891487
prom	chr11_gencode_AASDHPPT_ENSG00000149313.6	0.554182739027211
prom	chr11_gencode_ABCC8_ENSG00000006071.7	1
prom	chr11_gencode_ABCG4_ENSG00000172350.5	0.912347842203549
prom	chr11_gencode_ABTB2_ENSG00000166016.4	0.930752266723965
prom	chr11_gencode_AC131935.1_ENSG00000268242.1	0.357747150352264
prom	chr11_gencode_AC131971.1_ENSG00000183562.2	0.061246986273538
prom	chr11_gencode_AC132192.1_ENSG00000268403.1	0.99999999999998
prom	chr11_gencode_AC132216.1_ENSG00000184566.2	0.0624348585407425
prom	chr11_gencode_AC136297.1_ENSG00000267950.1	0.99999999999998
prom	chr11_gencode_ACAD8_ENSG00000151498.7	0.396641694592253
prom	chr11_gencode_ACAT1_ENSG00000075239.9	0.916463473094803
prom	chr11_gencode_ACCSL_ENSG00000205126.2	0.445080688958542
prom	chr11_gencode_ACCS_ENSG00000110455.9	0.858068323115896
prom	chr11_gencode_ACER3_ENSG00000078124.7	0.528596366164136
prom	chr11_gencode_ACP2_ENSG00000134575.5	0.297538319122985
prom	chr11_gencode_ACRV1_ENSG00000134940.9	0.961818936411243
prom	chr11_gencode_ACY3_ENSG00000132744.3	0.826018738688737
prom	chr11_gencode_ADAMTS15_ENSG00000166106.2	0.545830056752124
prom	chr11_gencode_ADAMTS8_ENSG00000134917.9	0.542693042053723
prom	chr11_gencode_ADM_ENSG00000148926.5	0.298296767175475
prom	chr11_gencode_ADRBK1_ENSG00000173020.6	0.668709625612798
prom	chr11_gencode_AGBL2_ENSG00000165923.11	0.0444956180620524
prom	chr11_gencode_AHNAK_ENSG00000124942.9	0.91470556760907
prom	chr11_gencode_AIP_ENSG00000110711.5	0.693710188482396
prom	chr11_gencode_AKIP1_ENSG00000166452.7	0.806981256939445
prom	chr11_gencode_AL356215.1_ENSG00000269766.1	0.200928330186409
prom	chr11_gencode_ALDH3B1_ENSG00000006534.11	0.423855646201287
prom	chr11_gencode_ALDH3B2_ENSG00000132746.10	0.0862538407925793
prom	chr11_gencode_ALG8_ENSG00000159063.8	0.896989313270402
prom	chr11_gencode_ALG9_ENSG00000086848.10	0.466233010509835
prom	chr11_gencode_ALKBH3_ENSG00000166199.8	0.304257873612073
prom	chr11_gencode_ALKBH8_ENSG00000137760.10	0.956079080755698
prom	chr11_gencode_ALX4_ENSG00000052850.5	1
prom	chr11_gencode_AMBRA1_ENSG00000110497.10	1
prom	chr11_gencode_AMICA1_ENSG00000160593.13	0.28792671415132
prom	chr11_gencode_AMOTL1_ENSG00000166025.13	0.7704513579889
prom	chr11_gencode_AMPD3_ENSG00000133805.11	0.93330014140953
prom	chr11_gencode_ANAPC15_ENSG00000110200.4	0.673056682255477
prom	chr11_gencode_ANGPTL5_ENSG00000187151.3	0.683430198285498
prom	chr11_gencode_ANKK1_ENSG00000170209.4	0.894988250588116
prom	chr11_gencode_ANKRD13D_ENSG00000172932.10	0.930049883360683
prom	chr11_gencode_ANKRD42_ENSG00000137494.9	0.033240258062704
prom	chr11_gencode_ANKRD49_ENSG00000168876.4	0.893207776273853
prom	chr11_gencode_ANO1_ENSG00000131620.13	0.924421614634365
prom	chr11_gencode_ANO3_ENSG00000134343.8	0.656174243608255
prom	chr11_gencode_ANO5_ENSG00000171714.10	0.974704902344658
prom	chr11_gencode_ANO9_ENSG00000185101.8	0.457904617569805
prom	chr11_gencode_AP000679.2_ENSG00000176984.2	0.929942561775335
prom	chr11_gencode_AP000708.1_ENSG00000255537.1	0.916204885719845
prom	chr11_gencode_AP000721.4_ENSG00000256100.1	0.832682592969465
prom	chr11_gencode_AP000758.1_ENSG00000269601.1	0.506672086301263
prom	chr11_gencode_AP000769.1_ENSG00000173727.7	0.728413081207299
prom	chr11_gencode_AP000783.1_ENSG00000254667.1	1
prom	chr11_gencode_AP000867.1_ENSG00000187811.3	0.884313996465429
prom	chr11_gencode_AP000889.3_ENSG00000268467.1	0.815076296450229
prom	chr11_gencode_AP000974.1_ENSG00000215504.2	0.999999999999987
prom	chr11_gencode_AP001024.1_ENSG00000214305.3	0.17405745594324
prom	chr11_gencode_AP001024.2_ENSG00000214306.3	0.855253625512541
prom	chr11_gencode_AP001350.1_ENSG00000269570.1	0.0784520358662931
prom	chr11_gencode_AP001362.1_ENSG00000269018.1	0.544993505065313
prom	chr11_gencode_AP001652.1_ENSG00000224130.1	0.464858574998799
prom	chr11_gencode_AP001885.1_ENSG00000179038.7	0.547022380485829
prom	chr11_gencode_AP001888.1_ENSG00000268351.1	0.999999999999986
prom	chr11_gencode_AP001925.1_ENSG00000269042.1	0.616977399435775
prom	chr11_gencode_AP002348.1_ENSG00000204306.2	0.791152383468777
prom	chr11_gencode_AP002353.1_ENSG00000268602.1	0.810166428762676
prom	chr11_gencode_AP002884.2_ENSG00000268472.1	0.39174378834129
prom	chr11_gencode_AP002884.3_ENSG00000272790.1	0.075871266385204
prom	chr11_gencode_AP002956.1_ENSG00000268192.1	0.0470767457227504
prom	chr11_gencode_AP003041.2_ENSG00000267981.1	0.457139288965673
prom	chr11_gencode_AP003062.1_ENSG00000268936.1	0.681432727837435
prom	chr11_gencode_AP003068.23_ENSG00000254614.1	0.158841031512199
prom	chr11_gencode_AP003068.6_ENSG00000187066.4	0.673906577509707
prom	chr11_gencode_AP003733.1_ENSG00000269089.1	5.17684147466773e-06
prom	chr11_gencode_AP003774.4_ENSG00000181908.4	0.256499788885807
prom	chr11_gencode_AP006621.5_ENSG00000255284.1	1
prom	chr11_gencode_AP2A2_ENSG00000183020.9	0.956710493771554
prom	chr11_gencode_AP5B1_ENSG00000254470.2	1
prom	chr11_gencode_APBB1_ENSG00000166313.14	0.844610102803519
prom	chr11_gencode_API5_ENSG00000166181.8	0.337924833752107
prom	chr11_gencode_APIP_ENSG00000149089.8	0.353549233652112
prom	chr11_gencode_APLNR_ENSG00000134817.9	0.101723705617191
prom	chr11_gencode_APLP2_ENSG00000084234.12	0.406479534896603
prom	chr11_gencode_APOA1_ENSG00000118137.5	0.680114392145046
prom	chr11_gencode_APOA4_ENSG00000110244.5	0.257610012284498
prom	chr11_gencode_APOA5_ENSG00000110243.7	0.697913803089095
prom	chr11_gencode_APOC3_ENSG00000110245.7	0.792214895423761
prom	chr11_gencode_AQP11_ENSG00000178301.3	0.627109554458425
prom	chr11_gencode_ARAP1_ENSG00000186635.10	0.926096171693189
prom	chr11_gencode_ARCN1_ENSG00000095139.9	0.999999999999989
prom	chr11_gencode_ARFGAP2_ENSG00000149182.10	0.426707261799195
prom	chr11_gencode_ARFIP2_ENSG00000132254.8	0.445175818911969
prom	chr11_gencode_ARHGAP1_ENSG00000175220.7	0.789259422340517
prom	chr11_gencode_ARHGAP20_ENSG00000137727.8	0.463032690635144
prom	chr11_gencode_ARHGAP32_ENSG00000134909.14	0.590732389443724
prom	chr11_gencode_ARHGAP42_ENSG00000165895.13	0.994209296707629
prom	chr11_gencode_ARHGEF12_ENSG00000196914.4	0.0544630808555053
prom	chr11_gencode_ARHGEF17_ENSG00000110237.3	0.662561098045229
prom	chr11_gencode_ARL14EP_ENSG00000152219.4	0.0934346855912371
prom	chr11_gencode_ARL2_ENSG00000213465.3	0.914717901045431
prom	chr11_gencode_ARNTL_ENSG00000133794.13	0.574386300296312
prom	chr11_gencode_ARRB1_ENSG00000137486.12	0.748948345400458
prom	chr11_gencode_ART1_ENSG00000129744.2	0.340787397911146
prom	chr11_gencode_ART5_ENSG00000167311.9	0.740837913601183
prom	chr11_gencode_ASCL2_ENSG00000183734.4	0.961308728420508
prom	chr11_gencode_ASCL3_ENSG00000176009.2	0.609609127536119
prom	chr11_gencode_ASRGL1_ENSG00000162174.8	0.961405272247103
prom	chr11_gencode_ATG13_ENSG00000175224.12	0.646812100701899
prom	chr11_gencode_ATG16L2_ENSG00000168010.6	0.802998523843635
prom	chr11_gencode_ATG2A_ENSG00000110046.8	0.385053358877841
prom	chr11_gencode_ATHL1_ENSG00000142102.11	0.969321618542453
prom	chr11_gencode_ATL3_ENSG00000184743.8	1
prom	chr11_gencode_ATM_ENSG00000149311.13	0.876694298644355
prom	chr11_gencode_ATP5L_ENSG00000167283.3	0.828312008504828
prom	chr11_gencode_B3GAT1_ENSG00000109956.8	0.991982306282926
prom	chr11_gencode_B3GAT3_ENSG00000149541.5	0.492730028727499
prom	chr11_gencode_B3GNT1_ENSG00000174684.6	0.612460260979458
prom	chr11_gencode_B3GNT6_ENSG00000198488.6	0.95552574990833
prom	chr11_gencode_B4GALNT4_ENSG00000182272.7	1
prom	chr11_gencode_BACE1_ENSG00000186318.12	0.343465544755286
prom	chr11_gencode_BAD_ENSG00000002330.9	0.150153577181557
prom	chr11_gencode_BANF1_ENSG00000175334.3	1
prom	chr11_gencode_BARX2_ENSG00000043039.5	0.577399126713469
prom	chr11_gencode_BATF2_ENSG00000168062.5	0.633445807622233
prom	chr11_gencode_BBOX1_ENSG00000129151.4	0.388317362496465
prom	chr11_gencode_BBS1_ENSG00000174483.15	0.858567479092376
prom	chr11_gencode_BCL9L_ENSG00000186174.8	0.750880988605816
prom	chr11_gencode_BCO2_ENSG00000197580.7	0.358033479716533
prom	chr11_gencode_BDNF_ENSG00000176697.14	0.842808688645444
prom	chr11_gencode_BEST1_ENSG00000167995.11	0.166494497134075
prom	chr11_gencode_BET1L_ENSG00000177951.13	0.550678937339305
prom	chr11_gencode_BIRC2_ENSG00000110330.4	1
prom	chr11_gencode_BIRC3_ENSG00000023445.9	0.937261631768587
prom	chr11_gencode_BLID_ENSG00000259571.1	0.218228945132323
prom	chr11_gencode_BRMS1_ENSG00000174744.9	0.131328281235825
prom	chr11_gencode_BRSK2_ENSG00000174672.11	0.953888637975418
prom	chr11_gencode_BSCL2_ENSG00000168000.10	0.961442048516482
prom	chr11_gencode_BSX_ENSG00000188909.4	1
prom	chr11_gencode_BTBD10_ENSG00000148925.6	0.58791402979088
prom	chr11_gencode_BTBD18_ENSG00000233436.3	0.017373330728123
prom	chr11_gencode_BTG4_ENSG00000137707.9	0.980642740353761
prom	chr11_gencode_BUD13_ENSG00000137656.7	0.573422570105102
prom	chr11_gencode_C11orf16_ENSG00000176029.9	0.390887698091403
prom	chr11_gencode_C11orf1_ENSG00000137720.3	0.755829515682212
prom	chr11_gencode_C11orf21_ENSG00000110665.7	0.181360454365954
prom	chr11_gencode_C11orf24_ENSG00000171067.6	0.325539140840714
prom	chr11_gencode_C11orf30_ENSG00000158636.12	0.934608578640694
prom	chr11_gencode_C11orf31_ENSG00000211450.5	0.9999999999999
prom	chr11_gencode_C11orf35_ENSG00000185522.4	0.092643140824773
prom	chr11_gencode_C11orf40_ENSG00000171987.1	0.745895756023879
prom	chr11_gencode_C11orf42_ENSG00000180878.2	0.999999999999851
prom	chr11_gencode_C11orf44_ENSG00000175728.2	0.726087096582488
prom	chr11_gencode_C11orf45_ENSG00000174370.5	0.963705618345326
prom	chr11_gencode_C11orf48_ENSG00000162194.8	0.76024013930259
prom	chr11_gencode_C11orf49_ENSG00000149179.9	0.130426278216023
prom	chr11_gencode_C11orf52_ENSG00000149300.5	0.536973176730075
prom	chr11_gencode_C11orf53_ENSG00000150750.6	0.376301840012422
prom	chr11_gencode_C11orf54_ENSG00000182919.10	0.452712460206643
prom	chr11_gencode_C11orf57_ENSG00000150776.13	1
prom	chr11_gencode_C11orf58_ENSG00000110696.5	0.882442958219222
prom	chr11_gencode_C11orf63_ENSG00000109944.6	0.391481024293155
prom	chr11_gencode_C11orf65_ENSG00000166323.8	0.747810574456434
prom	chr11_gencode_C11orf68_ENSG00000175573.6	0.197299757298789
prom	chr11_gencode_C11orf70_ENSG00000137691.8	0.147494413790748
prom	chr11_gencode_C11orf71_ENSG00000180425.7	1
prom	chr11_gencode_C11orf72_ENSG00000184224.3	0.209605494981358
prom	chr11_gencode_C11orf73_ENSG00000149196.11	0.262715852788746
prom	chr11_gencode_C11orf74_ENSG00000166352.11	0.396210946017581
prom	chr11_gencode_C11orf80_ENSG00000173715.11	0.543420533369336
prom	chr11_gencode_C11orf82_ENSG00000165490.8	0.934073539447445
prom	chr11_gencode_C11orf83_ENSG00000204922.4	1
prom	chr11_gencode_C11orf84_ENSG00000168005.4	0.999999999999928
prom	chr11_gencode_C11orf85_ENSG00000168070.7	0.523361364574682
prom	chr11_gencode_C11orf86_ENSG00000173237.4	0.615706780138294
prom	chr11_gencode_C11orf87_ENSG00000185742.6	0.81554758991364
prom	chr11_gencode_C11orf88_ENSG00000183644.9	0.112887120009353
prom	chr11_gencode_C11orf89_ENSG00000184682.5	0.141609924278596
prom	chr11_gencode_C11orf91_ENSG00000205177.5	0.658216196910671
prom	chr11_gencode_C11orf94_ENSG00000234776.1	0.574054302731046
prom	chr11_gencode_C11orf96_ENSG00000187479.4	0.911567932190889
prom	chr11_gencode_C1QTNF4_ENSG00000172247.3	0.197179462923935
prom	chr11_gencode_C1QTNF5_ENSG00000223953.3	0.11954289419924
prom	chr11_gencode_C2CD2L_ENSG00000172375.8	0.122332180179144
prom	chr11_gencode_C2CD3_ENSG00000168014.12	0.378478634327041
prom	chr11_gencode_CABP2_ENSG00000167791.7	0.601846329528058
prom	chr11_gencode_CABP4_ENSG00000175544.9	0.0228829852216589
prom	chr11_gencode_CADM1_ENSG00000182985.12	0.931448747188639
prom	chr11_gencode_CALCA_ENSG00000110680.8	0.617268365732807
prom	chr11_gencode_CALCB_ENSG00000175868.9	0.396888540094893
prom	chr11_gencode_CAPN1_ENSG00000014216.11	0.167931051641034
prom	chr11_gencode_CAPN5_ENSG00000149260.10	0.233859937250364
prom	chr11_gencode_CAPRIN1_ENSG00000135387.15	0.979904528661011
prom	chr11_gencode_CARD16_ENSG00000204397.3	0.791221671536204
prom	chr11_gencode_CARD17_ENSG00000255221.2	0.444936164146425
prom	chr11_gencode_CARD18_ENSG00000255501.1	0.214664205518885
prom	chr11_gencode_CARNS1_ENSG00000172508.6	0.795469969681621
prom	chr11_gencode_CARS_ENSG00000110619.12	0.289790506137113
prom	chr11_gencode_CASP12_ENSG00000204403.5	0.628006624210118
prom	chr11_gencode_CASP1_ENSG00000137752.18	0.614456392816484
prom	chr11_gencode_CASP4_ENSG00000196954.8	0.878441845118962
prom	chr11_gencode_CASP5_ENSG00000137757.6	1
prom	chr11_gencode_CATSPER1_ENSG00000175294.5	0.590841482395857
prom	chr11_gencode_CAT_ENSG00000121691.4	1
prom	chr11_gencode_CBL_ENSG00000110395.4	1
prom	chr11_gencode_CCDC153_ENSG00000248712.3	0.310913857128369
prom	chr11_gencode_CCDC15_ENSG00000149548.10	0.698415125856514
prom	chr11_gencode_CCDC179_ENSG00000255359.2	0.767429617646951
prom	chr11_gencode_CCDC34_ENSG00000109881.12	0.273625347484105
prom	chr11_gencode_CCDC67_ENSG00000165325.9	0.893526643698899
prom	chr11_gencode_CCDC73_ENSG00000186714.8	0.00165812436190114
prom	chr11_gencode_CCDC81_ENSG00000149201.5	0.315860160152985
prom	chr11_gencode_CCDC82_ENSG00000149231.7	0.206952818817874
prom	chr11_gencode_CCDC83_ENSG00000150676.8	1
prom	chr11_gencode_CCDC84_ENSG00000186166.4	0.619371037969269
prom	chr11_gencode_CCDC85B_ENSG00000175602.2	0.775354383622231
prom	chr11_gencode_CCDC86_ENSG00000110104.7	0.822906957530182
prom	chr11_gencode_CCDC87_ENSG00000182791.3	1
prom	chr11_gencode_CCDC88B_ENSG00000168071.17	0.607904505782596
prom	chr11_gencode_CCDC89_ENSG00000179071.3	0.131969244546745
prom	chr11_gencode_CCDC90B_ENSG00000137500.5	0.139125088628781
prom	chr11_gencode_CCKBR_ENSG00000110148.5	0.937750536144928
prom	chr11_gencode_CCND1_ENSG00000110092.3	0.868541795632638
prom	chr11_gencode_CCS_ENSG00000173992.4	1
prom	chr11_gencode_CD151_ENSG00000177697.13	0.0956705691853006
prom	chr11_gencode_CD248_ENSG00000174807.3	0.708029740085722
prom	chr11_gencode_CD3D_ENSG00000167286.5	0.203624106313166
prom	chr11_gencode_CD3E_ENSG00000198851.5	0.22240261487068
prom	chr11_gencode_CD3G_ENSG00000160654.5	0.224367488928462
prom	chr11_gencode_CD44_ENSG00000026508.12	0.999999999999972
prom	chr11_gencode_CD59_ENSG00000085063.10	0.206234227957736
prom	chr11_gencode_CD5_ENSG00000110448.6	0.935894711101237
prom	chr11_gencode_CD6_ENSG00000013725.10	0.472157695748657
prom	chr11_gencode_CD81_ENSG00000110651.7	0.927596393834385
prom	chr11_gencode_CD82_ENSG00000085117.7	0.999999999999908
prom	chr11_gencode_CDC42BPG_ENSG00000171219.8	0.893575115264383
prom	chr11_gencode_CDC42EP2_ENSG00000149798.3	0.805428100835113
prom	chr11_gencode_CDCA5_ENSG00000146670.5	0.17081849074619
prom	chr11_gencode_CDHR5_ENSG00000099834.14	0.999999999999861
prom	chr11_gencode_CDK2AP2_ENSG00000167797.3	0.287021784291193
prom	chr11_gencode_CDKN1C_ENSG00000129757.8	0.261243202675842
prom	chr11_gencode_CDON_ENSG00000064309.10	0.158241566270723
prom	chr11_gencode_CELF1_ENSG00000149187.13	0.448088750388775
prom	chr11_gencode_CEND1_ENSG00000184524.5	0.777907775718948
prom	chr11_gencode_CEP164_ENSG00000110274.10	0.29755934373626
prom	chr11_gencode_CEP57_ENSG00000166037.6	0.92384349984588
prom	chr11_gencode_CFL1_ENSG00000172757.8	0.988549178872609
prom	chr11_gencode_CHEK1_ENSG00000149554.8	0.457790306934891
prom	chr11_gencode_CHID1_ENSG00000177830.13	0.492573567951913
prom	chr11_gencode_CHKA_ENSG00000110721.7	0.70755279813501
prom	chr11_gencode_CHORDC1_ENSG00000110172.7	0.959290845146289
prom	chr11_gencode_CHRDL2_ENSG00000054938.11	0.117713169564237
prom	chr11_gencode_CHRM1_ENSG00000168539.3	0.584771168080034
prom	chr11_gencode_CHRM4_ENSG00000180720.6	0.478250631050998
prom	chr11_gencode_CHRNA10_ENSG00000129749.3	0.777055345762606
prom	chr11_gencode_CHST1_ENSG00000175264.3	0.999999999999892
prom	chr11_gencode_CKAP5_ENSG00000175216.10	0.737561624086989
prom	chr11_gencode_CLCF1_ENSG00000175505.9	0.332229726455077
prom	chr11_gencode_CLDN25_ENSG00000228607.2	0.227805545445785
prom	chr11_gencode_CLMP_ENSG00000166250.7	0.806433352964672
prom	chr11_gencode_CLNS1A_ENSG00000074201.4	0.351376624625143
prom	chr11_gencode_CLP1_ENSG00000172409.5	0.64636366434163
prom	chr11_gencode_CLPB_ENSG00000162129.8	0.477353260406567
prom	chr11_gencode_CNGA4_ENSG00000132259.8	0.923120008144383
prom	chr11_gencode_CNIH2_ENSG00000174871.6	0.772742287764256
prom	chr11_gencode_CNTF_ENSG00000242689.1	0.517939085333107
prom	chr11_gencode_CNTN5_ENSG00000149972.6	0.84974439225986
prom	chr11_gencode_COA4_ENSG00000181924.6	0.16231423093472
prom	chr11_gencode_COLCA1_ENSG00000196167.5	0.235749306412935
prom	chr11_gencode_COLCA2_ENSG00000214290.3	0.936755407442801
prom	chr11_gencode_COMMD9_ENSG00000110442.7	0.915602172626638
prom	chr11_gencode_COPB1_ENSG00000129083.8	0.999999999999883
prom	chr11_gencode_CORO1B_ENSG00000172725.9	0.769167249510352
prom	chr11_gencode_COX8A_ENSG00000176340.3	0.83688489107348
prom	chr11_gencode_CPSF7_ENSG00000149532.11	0.222196096806202
prom	chr11_gencode_CPT1A_ENSG00000110090.8	0.68730584509771
prom	chr11_gencode_CREB3L1_ENSG00000157613.6	0.631780636125104
prom	chr11_gencode_CREBZF_ENSG00000137504.9	0.911106194820726
prom	chr11_gencode_CRTAM_ENSG00000109943.4	0.00757349916051346
prom	chr11_gencode_CRY2_ENSG00000121671.7	0.135350554993621
prom	chr11_gencode_CRYAB_ENSG00000109846.3	0.952770533055204
prom	chr11_gencode_CSNK2A3_ENSG00000254598.2	0.0200452110849258
prom	chr11_gencode_CSRP3_ENSG00000129170.4	0.85412062682439
prom	chr11_gencode_CST6_ENSG00000175315.2	1
prom	chr11_gencode_CSTF3_ENSG00000176102.7	0.414800843438883
prom	chr11_gencode_CTD-2210P24.4_ENSG00000205106.2	0.911247874201692
prom	chr11_gencode_CTD-3074O7.11_ENSG00000256349.1	0.999999999999978
prom	chr11_gencode_CTNND1_ENSG00000198561.8	0.0299857066032958
prom	chr11_gencode_CTR9_ENSG00000198730.3	0.999999999999953
prom	chr11_gencode_CTSC_ENSG00000109861.11	0.975430445716924
prom	chr11_gencode_CTSD_ENSG00000117984.8	0.733624018036365
prom	chr11_gencode_CTSF_ENSG00000174080.6	0.151304742555767
prom	chr11_gencode_CTSW_ENSG00000172543.3	0.769178236633736
prom	chr11_gencode_CTTN_ENSG00000085733.11	0.306624204850707
prom	chr11_gencode_CUL5_ENSG00000166266.9	0.999999999999995
prom	chr11_gencode_CWC15_ENSG00000150316.7	0.999999999999983
prom	chr11_gencode_CWF19L2_ENSG00000152404.11	0.974269400901977
prom	chr11_gencode_CXCR5_ENSG00000160683.4	0.839745442955939
prom	chr11_gencode_CYB561A3_ENSG00000162144.5	0.0833284387167562
prom	chr11_gencode_CYB5R2_ENSG00000166394.10	1
prom	chr11_gencode_CYP2R1_ENSG00000186104.6	0.959425565096464
prom	chr11_gencode_DAGLA_ENSG00000134780.5	0.96267774655807
prom	chr11_gencode_DAK_ENSG00000149476.10	0.999999999999985
prom	chr11_gencode_DBX1_ENSG00000109851.5	0.226617390981367
prom	chr11_gencode_DCDC1_ENSG00000170959.10	0.72881155236037
prom	chr11_gencode_DCHS1_ENSG00000166341.6	0.692274316003102
prom	chr11_gencode_DCPS_ENSG00000110063.4	0.503446751689537
prom	chr11_gencode_DCUN1D5_ENSG00000137692.7	0.360442549102783
prom	chr11_gencode_DDB1_ENSG00000167986.9	0.672984522940915
prom	chr11_gencode_DDB2_ENSG00000134574.7	0.114557085622908
prom	chr11_gencode_DDI1_ENSG00000170967.3	0.0189501477835468
prom	chr11_gencode_DDX10_ENSG00000178105.5	0.925851038293181
prom	chr11_gencode_DDX25_ENSG00000109832.8	0.634005059308854
prom	chr11_gencode_DDX6_ENSG00000110367.7	0.61488905302933
prom	chr11_gencode_DEAF1_ENSG00000177030.12	0.467020740514933
prom	chr11_gencode_DEFB108B_ENSG00000184276.2	0.971605721059446
prom	chr11_gencode_DENND5A_ENSG00000184014.3	0.315460722375529
prom	chr11_gencode_DEPDC7_ENSG00000121690.5	0.87452436298149
prom	chr11_gencode_DGAT2_ENSG00000062282.10	0.958556984606817
prom	chr11_gencode_DGKZ_ENSG00000149091.11	0.112806964260393
prom	chr11_gencode_DHCR7_ENSG00000172893.11	0.93587485291304
prom	chr11_gencode_DIXDC1_ENSG00000150764.9	0.0121801544135631
prom	chr11_gencode_DKFZP434E1119_ENSG00000268635.1	0.696994519295448
prom	chr11_gencode_DKK3_ENSG00000050165.13	0.22296285104787
prom	chr11_gencode_DLAT_ENSG00000150768.11	0.662203251112044
prom	chr11_gencode_DLG2_ENSG00000150672.12	0.068090947054662
prom	chr11_gencode_DNAJB13_ENSG00000187726.4	0.00343492150666835
prom	chr11_gencode_DNAJC24_ENSG00000170946.10	0.556085438524604
prom	chr11_gencode_DNAJC4_ENSG00000110011.9	0.46554612807062
prom	chr11_gencode_DNHD1_ENSG00000179532.8	0.0240425241287426
prom	chr11_gencode_DPAGT1_ENSG00000172269.12	0.241582670932547
prom	chr11_gencode_DPF2_ENSG00000133884.5	1
prom	chr11_gencode_DPP3_ENSG00000254986.3	0.849327265910213
prom	chr11_gencode_DRAP1_ENSG00000175550.3	0.38597389647651
prom	chr11_gencode_DRD2_ENSG00000149295.9	0.884640504968226
prom	chr11_gencode_DRD4_ENSG00000069696.6	0.999999999999949
prom	chr11_gencode_DSCAML1_ENSG00000177103.9	0.615654410150397
prom	chr11_gencode_DTX4_ENSG00000110042.3	0.250845003474312
prom	chr11_gencode_DUSP8_ENSG00000184545.6	0.464637956165308
prom	chr11_gencode_DYNC2H1_ENSG00000187240.9	0.363143326543798
prom	chr11_gencode_E2F8_ENSG00000129173.8	0.929937509409194
prom	chr11_gencode_EED_ENSG00000074266.13	0.855224151417636
prom	chr11_gencode_EEF1G_ENSG00000254772.5	0.481750767027828
prom	chr11_gencode_EFCAB4A_ENSG00000177685.12	0.999999999999952
prom	chr11_gencode_EFEMP2_ENSG00000172638.8	0.676113062978005
prom	chr11_gencode_EHBP1L1_ENSG00000173442.7	0.95990387811063
prom	chr11_gencode_EHD1_ENSG00000110047.13	0.938305747924138
prom	chr11_gencode_EHF_ENSG00000135373.8	0.00460982345912851
prom	chr11_gencode_EI24_ENSG00000149547.10	0.455193945128838
prom	chr11_gencode_EIF1AD_ENSG00000175376.4	1
prom	chr11_gencode_EIF3F_ENSG00000175390.8	0.447700656148279
prom	chr11_gencode_EIF3M_ENSG00000149100.8	0.627014389542002
prom	chr11_gencode_EIF4G2_ENSG00000110321.11	0.389578662461077
prom	chr11_gencode_ELF5_ENSG00000135374.5	0.0780005845708913
prom	chr11_gencode_ELMOD1_ENSG00000110675.8	0.994555016265903
prom	chr11_gencode_ELP4_ENSG00000109911.13	0.827202097742153
prom	chr11_gencode_EML3_ENSG00000149499.7	0.628447117668603
prom	chr11_gencode_ENDOD1_ENSG00000149218.4	0.99999999999995
prom	chr11_gencode_EPS8L2_ENSG00000177106.10	0.687675201577864
prom	chr11_gencode_ESAM_ENSG00000149564.7	1
prom	chr11_gencode_ESRRA_ENSG00000173153.9	0.54965179555812
prom	chr11_gencode_ETS1_ENSG00000134954.10	0.782631317429344
prom	chr11_gencode_EXPH5_ENSG00000110723.7	0.748051670058533
prom	chr11_gencode_EXT2_ENSG00000151348.9	0.452671505147391
prom	chr11_gencode_F2_ENSG00000180210.10	0.416023385318061
prom	chr11_gencode_FADD_ENSG00000168040.4	0.880294931358938
prom	chr11_gencode_FADS1_ENSG00000149485.12	0.869794507352119
prom	chr11_gencode_FADS2_ENSG00000134824.9	0.974283066774969
prom	chr11_gencode_FADS3_ENSG00000221968.4	0.494734772247145
prom	chr11_gencode_FAM111A_ENSG00000166801.11	1
prom	chr11_gencode_FAM111B_ENSG00000189057.6	0.751417922799296
prom	chr11_gencode_FAM118B_ENSG00000197798.4	0.0835387974704206
prom	chr11_gencode_FAM160A2_ENSG00000051009.6	0.98978118444536
prom	chr11_gencode_FAM168A_ENSG00000054965.6	0.38076305633965
prom	chr11_gencode_FAM180B_ENSG00000196666.3	0.999999999999999
prom	chr11_gencode_FAM181B_ENSG00000182103.3	0.511136398251383
prom	chr11_gencode_FAM76B_ENSG00000077458.8	1
prom	chr11_gencode_FAM86C1_ENSG00000158483.11	0.832544316847027
prom	chr11_gencode_FAM89B_ENSG00000176973.7	0.744008162972356
prom	chr11_gencode_FANCF_ENSG00000183161.3	0.466698883325938
prom	chr11_gencode_FAR1_ENSG00000197601.8	0.99814912818464
prom	chr11_gencode_FAT3_ENSG00000165323.11	0.0621267052920241
prom	chr11_gencode_FAU_ENSG00000149806.6	1
prom	chr11_gencode_FBXO3_ENSG00000110429.9	0.838211029947587
prom	chr11_gencode_FCHSD2_ENSG00000137478.10	0.688850923464417
prom	chr11_gencode_FDX1_ENSG00000137714.2	0.114088471045715
prom	chr11_gencode_FDXACB1_ENSG00000255561.2	0.543121148305255
prom	chr11_gencode_FEN1_ENSG00000168496.3	0.999999999999954
prom	chr11_gencode_FERMT3_ENSG00000149781.8	1
prom	chr11_gencode_FEZ1_ENSG00000149557.8	0.737060639705202
prom	chr11_gencode_FGF19_ENSG00000162344.3	1
prom	chr11_gencode_FGF3_ENSG00000186895.2	0.953198718238236
prom	chr11_gencode_FGF4_ENSG00000075388.2	0.437271486821896
prom	chr11_gencode_FIBIN_ENSG00000176971.2	0.0405903263981976
prom	chr11_gencode_FIBP_ENSG00000172500.8	0.39695237073868
prom	chr11_gencode_FJX1_ENSG00000179431.5	0.273562210156696
prom	chr11_gencode_FKBP2_ENSG00000173486.8	0.780875697911206
prom	chr11_gencode_FLI1_ENSG00000151702.12	0.804525220408379
prom	chr11_gencode_FLRT1_ENSG00000126500.3	0.420099832364904
prom	chr11_gencode_FNBP4_ENSG00000109920.8	0.717724234705111
prom	chr11_gencode_FOLH1_ENSG00000086205.12	0.58381112075175
prom	chr11_gencode_FOLR1_ENSG00000110195.7	0.0976677968790537
prom	chr11_gencode_FOLR2_ENSG00000165457.9	0.0216292530295786
prom	chr11_gencode_FOLR3_ENSG00000110203.4	0.752556801787785
prom	chr11_gencode_FOLR4_ENSG00000183560.4	0.356539764515684
prom	chr11_gencode_FOSL1_ENSG00000175592.4	0.866487014759471
prom	chr11_gencode_FOXR1_ENSG00000176302.8	0.118191258162258
prom	chr11_gencode_FOXRED1_ENSG00000110074.6	0.231450994322132
prom	chr11_gencode_FRMD8_ENSG00000126391.9	0.825240749627583
prom	chr11_gencode_FSHB_ENSG00000131808.6	0.794152632933539
prom	chr11_gencode_FTH1_ENSG00000167996.11	0.000106388205228928
prom	chr11_gencode_FUT4_ENSG00000196371.2	0.174596180559851
prom	chr11_gencode_FXYD2_ENSG00000137731.9	0.977319123304349
prom	chr11_gencode_FXYD6-FXYD2_ENSG00000255245.3	0.73924605743762
prom	chr11_gencode_FXYD6_ENSG00000137726.11	0.689590048728303
prom	chr11_gencode_FZD4_ENSG00000174804.3	0.308823372443183
prom	chr11_gencode_GAB2_ENSG00000033327.8	0.893603302396883
prom	chr11_gencode_GAL3ST3_ENSG00000175229.6	0.783658207308044
prom	chr11_gencode_GALNT18_ENSG00000110328.5	0.897442070307693
prom	chr11_gencode_GAL_ENSG00000069482.6	0.702342857188843
prom	chr11_gencode_GANAB_ENSG00000089597.12	0.296366532763437
prom	chr11_gencode_GAS2_ENSG00000148935.6	0.508053346319902
prom	chr11_gencode_GDPD4_ENSG00000178795.5	0.225050737174859
prom	chr11_gencode_GDPD5_ENSG00000158555.10	0.515352952366085
prom	chr11_gencode_GIF_ENSG00000134812.3	0.704792921579086
prom	chr11_gencode_GLB1L2_ENSG00000149328.10	0.990348363535782
prom	chr11_gencode_GLB1L3_ENSG00000166105.11	0.752815964416947
prom	chr11_gencode_GLYATL1_ENSG00000166840.9	0.672223914672691
prom	chr11_gencode_GLYATL2_ENSG00000156689.2	0.00455796558875697
prom	chr11_gencode_GLYAT_ENSG00000149124.6	0.000196007563044843
prom	chr11_gencode_GNG3_ENSG00000162188.5	0.999999999999951
prom	chr11_gencode_GPHA2_ENSG00000149735.2	0.00753942309786383
prom	chr11_gencode_GPR137_ENSG00000173264.9	0.0837581863872577
prom	chr11_gencode_GPR152_ENSG00000175514.2	0.999999999999976
prom	chr11_gencode_GPR83_ENSG00000123901.4	0.876496697186254
prom	chr11_gencode_GRAMD1B_ENSG00000023171.10	0.522956744884447
prom	chr11_gencode_GRIA4_ENSG00000152578.8	0.967591264556199
prom	chr11_gencode_GRIK4_ENSG00000149403.7	0.921383073711419
prom	chr11_gencode_GRM5_ENSG00000168959.10	0.890952197353509
prom	chr11_gencode_GSTP1_ENSG00000084207.11	0.45248259054915
prom	chr11_gencode_GTF2H1_ENSG00000110768.7	0.569940915342628
prom	chr11_gencode_GUCY1A2_ENSG00000152402.6	0.981481047700698
prom	chr11_gencode_GYLTL1B_ENSG00000165905.12	0.725335503627108
prom	chr11_gencode_H2AFX_ENSG00000188486.3	0.399044282558553
prom	chr11_gencode_HARBI1_ENSG00000180423.4	0.592269991245038
prom	chr11_gencode_HBB_ENSG00000244734.2	0.474266195863644
prom	chr11_gencode_HBD_ENSG00000223609.3	0.0934838150579926
prom	chr11_gencode_HBE1_ENSG00000213931.1	0.134998203655205
prom	chr11_gencode_HBG1_ENSG00000213934.5	0.917564524673921
prom	chr11_gencode_HBG2_ENSG00000196565.8	0.94520548607333
prom	chr11_gencode_HEPACAM_ENSG00000165478.6	0.215041873442449
prom	chr11_gencode_HEPHL1_ENSG00000181333.11	0.439343686551893
prom	chr11_gencode_HEPN1_ENSG00000221932.5	0.111898561342418
prom	chr11_gencode_HINFP_ENSG00000172273.8	0.00245830865962367
prom	chr11_gencode_HIPK3_ENSG00000110422.7	0.88481123842894
prom	chr11_gencode_HMBS_ENSG00000256269.2	0.804475864905454
prom	chr11_gencode_HNRNPUL2_ENSG00000214753.2	1
prom	chr11_gencode_HPS5_ENSG00000110756.13	0.244496348054587
prom	chr11_gencode_HPX_ENSG00000110169.6	0.521114919843961
prom	chr11_gencode_HRASLS2_ENSG00000133328.3	0.716794359800996
prom	chr11_gencode_HRASLS5_ENSG00000168004.5	0.496273301714693
prom	chr11_gencode_HRAS_ENSG00000174775.12	0.995878840392921
prom	chr11_gencode_HSD17B12_ENSG00000149084.7	0.817187255285186
prom	chr11_gencode_HSPA8_ENSG00000109971.9	0.503640586985385
prom	chr11_gencode_HSPB2_ENSG00000170276.4	0.654482532735363
prom	chr11_gencode_HTATIP2_ENSG00000109854.9	0.22020386269437
prom	chr11_gencode_HTR3A_ENSG00000166736.7	0.0984057165938648
prom	chr11_gencode_HTR3B_ENSG00000149305.2	0.183360244054508
prom	chr11_gencode_HYLS1_ENSG00000198331.6	0.0500491534632931
prom	chr11_gencode_HYOU1_ENSG00000149428.14	0.143647026520824
prom	chr11_gencode_IFITM10_ENSG00000244242.1	0.437130627839162
prom	chr11_gencode_IFITM1_ENSG00000185885.11	1
prom	chr11_gencode_IFITM2_ENSG00000185201.12	0.243249996720369
prom	chr11_gencode_IFITM3_ENSG00000142089.11	6.30737986244758e-05
prom	chr11_gencode_IFITM5_ENSG00000206013.2	0.773024221776571
prom	chr11_gencode_IFT46_ENSG00000118096.3	0.0543487842124746
prom	chr11_gencode_IGF2_ENSG00000167244.13	0.781902772650217
prom	chr11_gencode_IGHMBP2_ENSG00000132740.4	0.760665299173922
prom	chr11_gencode_IGSF22_ENSG00000179057.9	0.8986349604556
prom	chr11_gencode_IGSF9B_ENSG00000080854.10	0.0553183080778865
prom	chr11_gencode_IL10RA_ENSG00000110324.5	0.758996570761082
prom	chr11_gencode_IL18BP_ENSG00000137496.13	0.777319852012722
prom	chr11_gencode_IL18_ENSG00000150782.7	0.12584597360706
prom	chr11_gencode_ILK_ENSG00000166333.9	0.701604471778289
prom	chr11_gencode_IMMP1L_ENSG00000148950.5	0.82760996484524
prom	chr11_gencode_INCENP_ENSG00000149503.8	0.922519504597246
prom	chr11_gencode_INPPL1_ENSG00000165458.9	0.952683587035472
prom	chr11_gencode_INS-IGF2_ENSG00000129965.9	0.0758229477697078
prom	chr11_gencode_INSC_ENSG00000188487.7	0.929641447101274
prom	chr11_gencode_INS_ENSG00000254647.2	0.10392124128316
prom	chr11_gencode_INTS4_ENSG00000149262.12	0.593901162098257
prom	chr11_gencode_INTS5_ENSG00000185085.2	0.182629768712459
prom	chr11_gencode_IPO7_ENSG00000205339.5	0.636027544275204
prom	chr11_gencode_IRF7_ENSG00000185507.15	0.808397823313397
prom	chr11_gencode_JAM3_ENSG00000166086.8	0.919517376853796
prom	chr11_gencode_JRKL_ENSG00000183340.5	0.128122361142588
prom	chr11_gencode_KAT5_ENSG00000172977.8	0.684561765036681
prom	chr11_gencode_KBTBD3_ENSG00000182359.10	0.978571592397038
prom	chr11_gencode_KBTBD4_ENSG00000123444.9	1
prom	chr11_gencode_KBTBD4_ENSG00000231880.1	0.999999999999988
prom	chr11_gencode_KCNA4_ENSG00000182255.6	0.92489360174702
prom	chr11_gencode_KCNC1_ENSG00000129159.6	0.999999999999999
prom	chr11_gencode_KCNE3_ENSG00000175538.6	0.704824918058067
prom	chr11_gencode_KCNJ11_ENSG00000187486.5	0.999999999999951
prom	chr11_gencode_KCNJ1_ENSG00000151704.11	0.95535427456734
prom	chr11_gencode_KCNJ5_ENSG00000120457.7	0.614413854391294
prom	chr11_gencode_KCNK4_ENSG00000182450.8	0.677235768268928
prom	chr11_gencode_KCNK7_ENSG00000173338.8	0.799844761941741
prom	chr11_gencode_KCNQ1_ENSG00000053918.11	0.852888712255049
prom	chr11_gencode_KCTD14_ENSG00000151364.11	0.548942060853109
prom	chr11_gencode_KCTD21_ENSG00000188997.3	1
prom	chr11_gencode_KDELC2_ENSG00000178202.8	0.949818342093915
prom	chr11_gencode_KDM2A_ENSG00000173120.10	0.889145077079238
prom	chr11_gencode_KDM4D_ENSG00000186280.5	0.999999999999974
prom	chr11_gencode_KDM4E_ENSG00000235268.2	0.759219294539525
prom	chr11_gencode_KIAA1377_ENSG00000110318.9	0.414513374195706
prom	chr11_gencode_KIAA1549L_ENSG00000110427.10	0.999999999999971
prom	chr11_gencode_KIAA1731_ENSG00000166004.10	0.975791778099305
prom	chr11_gencode_KIF18A_ENSG00000121621.6	0.598910572335179
prom	chr11_gencode_KIRREL3_ENSG00000149571.6	0.997436779425597
prom	chr11_gencode_KLC2_ENSG00000174996.7	0.948626249786299
prom	chr11_gencode_KLHL35_ENSG00000149243.11	0.784619109151424
prom	chr11_gencode_KMT2A_ENSG00000118058.16	0.718513077851474
prom	chr11_gencode_KRTAP5-10_ENSG00000204572.5	0.530641954330838
prom	chr11_gencode_KRTAP5-11_ENSG00000204571.4	0.723476163379391
prom	chr11_gencode_KRTAP5-1_ENSG00000205869.2	0.455169477567095
prom	chr11_gencode_KRTAP5-2_ENSG00000205867.2	1
prom	chr11_gencode_KRTAP5-3_ENSG00000196224.7	0.00396326179322781
prom	chr11_gencode_KRTAP5-4_ENSG00000241598.4	0.478716488252742
prom	chr11_gencode_KRTAP5-5_ENSG00000185940.9	0.434609000911843
prom	chr11_gencode_KRTAP5-6_ENSG00000205864.1	0.316731943739827
prom	chr11_gencode_KRTAP5-7_ENSG00000244411.2	0.821160177823997
prom	chr11_gencode_KRTAP5-8_ENSG00000241233.1	0.334122576001093
prom	chr11_gencode_KRTAP5-9_ENSG00000254997.2	0.202657111974305
prom	chr11_gencode_LAMTOR1_ENSG00000149357.5	0.999999999999883
prom	chr11_gencode_LAYN_ENSG00000204381.7	0.657649075921449
prom	chr11_gencode_LDHAL6A_ENSG00000166800.5	0.000330680511996112
prom	chr11_gencode_LDHA_ENSG00000134333.9	0.920791362231003
prom	chr11_gencode_LDHC_ENSG00000166796.7	0.0136604083773577
prom	chr11_gencode_LDLRAD3_ENSG00000179241.8	0.871552099834364
prom	chr11_gencode_LGALS12_ENSG00000133317.10	0.384055106257756
prom	chr11_gencode_LGR4_ENSG00000205213.9	0.583951159195658
prom	chr11_gencode_LIN7C_ENSG00000148943.7	0.532463785521234
prom	chr11_gencode_LIPT2_ENSG00000175536.6	0.198006965635812
prom	chr11_gencode_LMO1_ENSG00000166407.9	0.999999999999938
prom	chr11_gencode_LMO2_ENSG00000135363.7	0.393358246929553
prom	chr11_gencode_LPXN_ENSG00000110031.8	0.883931234032608
prom	chr11_gencode_LRFN4_ENSG00000173621.8	1
prom	chr11_gencode_LRP4_ENSG00000134569.5	1
prom	chr11_gencode_LRP5_ENSG00000162337.7	0.743618055272989
prom	chr11_gencode_LRRC10B_ENSG00000204950.2	0.878857509432099
prom	chr11_gencode_LRRC32_ENSG00000137507.7	0.584679872338037
prom	chr11_gencode_LRRC4C_ENSG00000148948.3	0.054524324213122
prom	chr11_gencode_LRRC55_ENSG00000183908.5	0.999999999999911
prom	chr11_gencode_LRRC56_ENSG00000161328.10	0.469387154371698
prom	chr11_gencode_LRRN4CL_ENSG00000177363.4	0.233556769240341
prom	chr11_gencode_LRTOMT_ENSG00000184154.8	0.00559598127484448
prom	chr11_gencode_LSP1_ENSG00000130592.9	0.0288392170679354
prom	chr11_gencode_LTBP3_ENSG00000168056.10	0.046114763467134
prom	chr11_gencode_LUZP2_ENSG00000187398.7	0.508210524255066
prom	chr11_gencode_LYVE1_ENSG00000133800.4	0.890175951469135
prom	chr11_gencode_MACROD1_ENSG00000133315.6	1
prom	chr11_gencode_MADD_ENSG00000110514.14	0.994653807428388
prom	chr11_gencode_MAML2_ENSG00000184384.9	0.220586891967527
prom	chr11_gencode_MAP3K11_ENSG00000173327.3	0.898762863578752
prom	chr11_gencode_MAP4K2_ENSG00000168067.7	0.999999999999879
prom	chr11_gencode_MAP6_ENSG00000171533.7	0.1463602992988
prom	chr11_gencode_MAPK8IP1_ENSG00000121653.7	0.40207896004865
prom	chr11_gencode_MARK2_ENSG00000072518.16	0.212415298677242
prom	chr11_gencode_MCAM_ENSG00000076706.10	0.61192364174835
prom	chr11_gencode_MDK_ENSG00000110492.11	1
prom	chr11_gencode_ME3_ENSG00000151376.12	0.0765495198335954
prom	chr11_gencode_MED17_ENSG00000042429.6	0.640154650559134
prom	chr11_gencode_MED19_ENSG00000156603.10	0.0574354409506632
prom	chr11_gencode_MEN1_ENSG00000133895.10	0.119142853283021
prom	chr11_gencode_METTL12_ENSG00000214756.3	0.665925745503332
prom	chr11_gencode_METTL15_ENSG00000169519.15	0.530107767607587
prom	chr11_gencode_MFRP_ENSG00000235718.3	0.0439000863405795
prom	chr11_gencode_MICAL2_ENSG00000133816.9	0.971883096335399
prom	chr11_gencode_MICALCL_ENSG00000133808.4	0.999999999999955
prom	chr11_gencode_MMP10_ENSG00000166670.5	0.520567286345576
prom	chr11_gencode_MMP13_ENSG00000137745.7	0.00873610913006639
prom	chr11_gencode_MMP1_ENSG00000196611.4	0.321925495011914
prom	chr11_gencode_MMP20_ENSG00000137674.3	0.343129246213174
prom	chr11_gencode_MMP26_ENSG00000167346.3	0.5945598552949
prom	chr11_gencode_MMP27_ENSG00000137675.4	0.320409059708968
prom	chr11_gencode_MMP3_ENSG00000149968.7	0.918706492263642
prom	chr11_gencode_MMP7_ENSG00000137673.4	1
prom	chr11_gencode_MMP8_ENSG00000118113.7	0.426988876254979
prom	chr11_gencode_MOB2_ENSG00000182208.8	0.268534842730604
prom	chr11_gencode_MOGAT2_ENSG00000166391.10	0.10573902545362
prom	chr11_gencode_MPEG1_ENSG00000197629.5	0.65506914383634
prom	chr11_gencode_MPPED2_ENSG00000066382.12	0.966522937668006
prom	chr11_gencode_MPZL2_ENSG00000149573.4	0.730516547675214
prom	chr11_gencode_MPZL3_ENSG00000160588.5	0.846171578453485
prom	chr11_gencode_MRE11A_ENSG00000020922.8	0.748211042432056
prom	chr11_gencode_MRGPRD_ENSG00000172938.3	0.213751171619463
prom	chr11_gencode_MRGPRE_ENSG00000184350.8	1
prom	chr11_gencode_MRGPRF_ENSG00000172935.8	0.597687643736265
prom	chr11_gencode_MRGPRG_ENSG00000182170.3	0.599862890541567
prom	chr11_gencode_MRGPRX1_ENSG00000170255.6	0.0693879625874458
prom	chr11_gencode_MRGPRX2_ENSG00000183695.2	0.58519519013085
prom	chr11_gencode_MRGPRX3_ENSG00000179826.5	0.411197146803912
prom	chr11_gencode_MRGPRX4_ENSG00000179817.3	0.633903803819205
prom	chr11_gencode_MRPL11_ENSG00000174547.9	0.0146544368895384
prom	chr11_gencode_MRPL16_ENSG00000166902.4	1
prom	chr11_gencode_MRPL17_ENSG00000158042.8	0.376482881644935
prom	chr11_gencode_MRPL21_ENSG00000197345.8	0.756040017148733
prom	chr11_gencode_MRPL23_ENSG00000214026.6	0.98808585682806
prom	chr11_gencode_MRPL48_ENSG00000175581.9	0.745569408949841
prom	chr11_gencode_MRPL49_ENSG00000149792.4	1
prom	chr11_gencode_MRVI1_ENSG00000072952.14	0.20442604976862
prom	chr11_gencode_MS4A10_ENSG00000172689.1	0.88974738439247
prom	chr11_gencode_MS4A12_ENSG00000071203.5	0.725405595931313
prom	chr11_gencode_MS4A13_ENSG00000204979.3	0.884961380963778
prom	chr11_gencode_MS4A14_ENSG00000166928.6	0.283677289813757
prom	chr11_gencode_MS4A15_ENSG00000166961.10	0.0182574377239379
prom	chr11_gencode_MS4A18_ENSG00000214782.3	0.144447152893568
prom	chr11_gencode_MS4A1_ENSG00000156738.13	0.394613400756462
prom	chr11_gencode_MS4A2_ENSG00000149534.4	0.896984735878287
prom	chr11_gencode_MS4A3_ENSG00000149516.9	0.641358204265319
prom	chr11_gencode_MS4A4A_ENSG00000110079.12	0.0523723621829837
prom	chr11_gencode_MS4A4E_ENSG00000214787.4	0.378965886812268
prom	chr11_gencode_MS4A5_ENSG00000166930.2	0.595133549730574
prom	chr11_gencode_MS4A6A_ENSG00000110077.10	0.27692945165092
prom	chr11_gencode_MS4A6E_ENSG00000166926.4	0.642406004435655
prom	chr11_gencode_MS4A7_ENSG00000166927.8	0.117421631224071
prom	chr11_gencode_MS4A8_ENSG00000166959.3	0.361606793045954
prom	chr11_gencode_MSANTD2_ENSG00000120458.5	0.764275460476591
prom	chr11_gencode_MSANTD4_ENSG00000170903.6	0.884428157104592
prom	chr11_gencode_MTA2_ENSG00000149480.2	0.162754429613033
prom	chr11_gencode_MTCH2_ENSG00000109919.5	0.890156468621911
prom	chr11_gencode_MTL5_ENSG00000132749.6	0.475384932151191
prom	chr11_gencode_MTMR2_ENSG00000087053.14	0.882298826445865
prom	chr11_gencode_MTNR1B_ENSG00000134640.2	0.328660425808063
prom	chr11_gencode_MTRNR2L8_ENSG00000255823.1	0.630534455283075
prom	chr11_gencode_MUC15_ENSG00000169550.8	0.600424665861521
prom	chr11_gencode_MUC2_ENSG00000198788.7	0.417456579863698
prom	chr11_gencode_MUC5AC_ENSG00000215182.6	0.521155779733295
prom	chr11_gencode_MUC5B_ENSG00000117983.13	0.879731556637013
prom	chr11_gencode_MUC6_ENSG00000184956.11	0.969008845197105
prom	chr11_gencode_MUS81_ENSG00000172732.7	0.461523475972628
prom	chr11_gencode_MYBPC3_ENSG00000134571.6	0.836117896755268
prom	chr11_gencode_MYEOV_ENSG00000172927.3	0.0117870525478434
prom	chr11_gencode_MYO7A_ENSG00000137474.15	0.491868252572496
prom	chr11_gencode_MYOD1_ENSG00000129152.3	0.906699823104951
prom	chr11_gencode_MYRF_ENSG00000124920.9	0.378322488633708
prom	chr11_gencode_NAA40_ENSG00000110583.8	0.779469903511673
prom	chr11_gencode_NAALAD2_ENSG00000077616.6	0.325499676066988
prom	chr11_gencode_NAALADL1_ENSG00000168060.10	0.871453116164055
prom	chr11_gencode_NADSYN1_ENSG00000172890.7	0.961589519803295
prom	chr11_gencode_NAP1L4_ENSG00000205531.8	0.918506902086674
prom	chr11_gencode_NARS2_ENSG00000137513.5	0.799183953699432
prom	chr11_gencode_NAT10_ENSG00000135372.4	0.346865883389767
prom	chr11_gencode_NAV2_ENSG00000166833.15	0.875087994834869
prom	chr11_gencode_NCAM1_ENSG00000149294.12	0.888845280252378
prom	chr11_gencode_NCAPD3_ENSG00000151503.8	1
prom	chr11_gencode_NCR3LG1_ENSG00000188211.4	0.864101117945614
prom	chr11_gencode_NDUFC2-KCTD14_ENSG00000259112.1	0.314258365330688
prom	chr11_gencode_NDUFC2_ENSG00000151366.8	0.713229615927897
prom	chr11_gencode_NDUFS3_ENSG00000213619.5	1
prom	chr11_gencode_NDUFS8_ENSG00000110717.6	0.338132274295074
prom	chr11_gencode_NDUFV1_ENSG00000167792.7	0.0468066104519224
prom	chr11_gencode_NELL1_ENSG00000165973.13	0.967659140591489
prom	chr11_gencode_NEU3_ENSG00000162139.5	0.0418332443511574
prom	chr11_gencode_NFRKB_ENSG00000170322.10	0.191493952001435
prom	chr11_gencode_NLRP10_ENSG00000182261.3	0.419799368081364
prom	chr11_gencode_NLRP14_ENSG00000158077.4	0.868479378572225
prom	chr11_gencode_NLRP6_ENSG00000174885.8	0.322226997057947
prom	chr11_gencode_NLRX1_ENSG00000160703.11	0.269901669954739
prom	chr11_gencode_NNMT_ENSG00000166741.3	0.959697905398752
prom	chr11_gencode_NOX4_ENSG00000086991.8	0.428956057188672
prom	chr11_gencode_NPAS4_ENSG00000174576.4	0.218009613448555
prom	chr11_gencode_NPAT_ENSG00000149308.12	0.91573603993058
prom	chr11_gencode_NR1H3_ENSG00000025434.14	0.336972881855141
prom	chr11_gencode_NRGN_ENSG00000154146.8	1
prom	chr11_gencode_NRIP3_ENSG00000175352.6	1
prom	chr11_gencode_NRXN2_ENSG00000110076.14	0.988890814514873
prom	chr11_gencode_NTM_ENSG00000182667.10	0.37514480384999
prom	chr11_gencode_NUCB2_ENSG00000070081.11	0.735356653272882
prom	chr11_gencode_NUDT22_ENSG00000149761.4	0.073329952927508
prom	chr11_gencode_NUDT8_ENSG00000167799.5	0.518034356717176
prom	chr11_gencode_NUMA1_ENSG00000137497.13	0.0845054668759503
prom	chr11_gencode_NUP160_ENSG00000030066.9	0.15608346638296
prom	chr11_gencode_NUP98_ENSG00000110713.11	0.0885012563408825
prom	chr11_gencode_NXF1_ENSG00000162231.9	0.344849181331284
prom	chr11_gencode_NXPE1_ENSG00000095110.3	0.354779555121038
prom	chr11_gencode_NXPE2_ENSG00000204361.7	0.88503803536748
prom	chr11_gencode_NXPE4_ENSG00000137634.5	0.145642690754495
prom	chr11_gencode_OAF_ENSG00000184232.4	0.0441151132585748
prom	chr11_gencode_ODF3_ENSG00000177947.9	0.723915752049136
prom	chr11_gencode_OLFML1_ENSG00000183801.3	0.458637839892166
prom	chr11_gencode_OMP_ENSG00000254550.1	0.723070750970437
prom	chr11_gencode_OOSP1_ENSG00000214788.1	0.230819687194041
prom	chr11_gencode_OPCML_ENSG00000183715.9	0.999786520858011
prom	chr11_gencode_OR10A2_ENSG00000170790.4	0.999999999999952
prom	chr11_gencode_OR10A3_ENSG00000170683.5	0.511584851679217
prom	chr11_gencode_OR10A4_ENSG00000170782.3	0.743108083534501
prom	chr11_gencode_OR10A5_ENSG00000166363.4	0.221810262929345
prom	chr11_gencode_OR10A6_ENSG00000175393.2	0.597015549167135
prom	chr11_gencode_OR10AG1_ENSG00000174970.2	0.280337960705859
prom	chr11_gencode_OR10D3_ENSG00000197309.2	0.637188798969471
prom	chr11_gencode_OR10G4_ENSG00000254737.1	0.334288310953609
prom	chr11_gencode_OR10G6_ENSG00000198674.3	0.689164794609226
prom	chr11_gencode_OR10G7_ENSG00000182634.7	0.435289227680909
prom	chr11_gencode_OR10G8_ENSG00000234560.3	0.68526047447842
prom	chr11_gencode_OR10G9_ENSG00000236981.1	0.632398497667541
prom	chr11_gencode_OR10Q1_ENSG00000180475.4	0.955915745355918
prom	chr11_gencode_OR10S1_ENSG00000196248.4	0.662585723018885
prom	chr11_gencode_OR10V1_ENSG00000172289.2	0.212167916472629
prom	chr11_gencode_OR10W1_ENSG00000172772.3	0.398498749118208
prom	chr11_gencode_OR1S1_ENSG00000172774.6	0.805399370560855
prom	chr11_gencode_OR1S2_ENSG00000197887.3	0.684201631186441
prom	chr11_gencode_OR2AG1_ENSG00000170803.4	0.689874918161891
prom	chr11_gencode_OR2AG2_ENSG00000188124.2	0.310911266892357
prom	chr11_gencode_OR2AT4_ENSG00000171561.3	0.999999999999974
prom	chr11_gencode_OR2D2_ENSG00000166368.2	0.750720937668045
prom	chr11_gencode_OR2D3_ENSG00000178358.3	0.282407501835046
prom	chr11_gencode_OR4A15_ENSG00000181958.3	0.00131902273269069
prom	chr11_gencode_OR4A16_ENSG00000181961.2	0.137800855936868
prom	chr11_gencode_OR4A47_ENSG00000237388.2	0.728089802041687
prom	chr11_gencode_OR4A5_ENSG00000221840.2	0.48664915215636
prom	chr11_gencode_OR4B1_ENSG00000175619.2	0.238118377294098
prom	chr11_gencode_OR4C11_ENSG00000172188.4	0.732752583634049
prom	chr11_gencode_OR4C12_ENSG00000221954.2	0.349839990250143
prom	chr11_gencode_OR4C13_ENSG00000258817.1	0.0216639825114611
prom	chr11_gencode_OR4C15_ENSG00000181939.2	0.0842037969786555
prom	chr11_gencode_OR4C16_ENSG00000181935.3	0.268314480940351
prom	chr11_gencode_OR4C3_ENSG00000176547.7	0.342707782515545
prom	chr11_gencode_OR4C46_ENSG00000185926.1	0.0053893858148017
prom	chr11_gencode_OR4C5_ENSG00000176540.3	2.43598873459906e-06
prom	chr11_gencode_OR4C6_ENSG00000181903.3	0.154120882102243
prom	chr11_gencode_OR4D10_ENSG00000254466.1	0.584798517135851
prom	chr11_gencode_OR4D11_ENSG00000176200.1	0.460269172494849
prom	chr11_gencode_OR4D5_ENSG00000171014.2	0.456240383975748
prom	chr11_gencode_OR4D6_ENSG00000166884.2	0.261462616874834
prom	chr11_gencode_OR4D9_ENSG00000172742.4	0.506605820368089
prom	chr11_gencode_OR4P4_ENSG00000181927.2	0.00141930430919416
prom	chr11_gencode_OR4S1_ENSG00000176555.1	0.548352561075544
prom	chr11_gencode_OR4S2_ENSG00000174982.2	0.462601901904144
prom	chr11_gencode_OR4X1_ENSG00000176567.1	0.147922916790299
prom	chr11_gencode_OR4X2_ENSG00000172208.3	0.31403760237193
prom	chr11_gencode_OR51A2_ENSG00000205496.1	0.0469551523383033
prom	chr11_gencode_OR51A4_ENSG00000205497.2	0.896341674564664
prom	chr11_gencode_OR51A7_ENSG00000176895.8	0.211366596818242
prom	chr11_gencode_OR51B2_ENSG00000184881.2	0.00576232245521158
prom	chr11_gencode_OR51B4_ENSG00000183251.3	0.616444948057743
prom	chr11_gencode_OR51B5_ENSG00000242180.2	0.829105205114873
prom	chr11_gencode_OR51B6_ENSG00000176239.7	0.39761564021938
prom	chr11_gencode_OR51D1_ENSG00000197428.2	0.592336914458394
prom	chr11_gencode_OR51E1_ENSG00000180785.8	0.0500199097295219
prom	chr11_gencode_OR51E2_ENSG00000167332.7	0.397929242703455
prom	chr11_gencode_OR51F1_ENSG00000188069.3	0.173070737482964
prom	chr11_gencode_OR51F2_ENSG00000176925.5	5.94156532654768e-06
prom	chr11_gencode_OR51G1_ENSG00000176879.2	0.0253646140874533
prom	chr11_gencode_OR51G2_ENSG00000176893.3	0.219882866166775
prom	chr11_gencode_OR51H1P_ENSG00000176904.1	0.41888100266274
prom	chr11_gencode_OR51I1_ENSG00000167359.8	0.143526973661577
prom	chr11_gencode_OR51I2_ENSG00000187918.3	0.022866846909957
prom	chr11_gencode_OR51J1_ENSG00000184321.1	0.20773909819508
prom	chr11_gencode_OR51L1_ENSG00000176798.1	0.0870223210097254
prom	chr11_gencode_OR51M1_ENSG00000184698.3	0.186310187421035
prom	chr11_gencode_OR51Q1_ENSG00000167360.4	0.0773113098176094
prom	chr11_gencode_OR51S1_ENSG00000176922.2	0.855396675711442
prom	chr11_gencode_OR51T1_ENSG00000176900.2	0.158393319151711
prom	chr11_gencode_OR51V1_ENSG00000176742.1	0.521519133692772
prom	chr11_gencode_OR52A1_ENSG00000182070.4	0.316608401001975
prom	chr11_gencode_OR52A5_ENSG00000171944.1	0.182218168057344
prom	chr11_gencode_OR52B1P_ENSG00000180909.1	0.400383081919518
prom	chr11_gencode_OR52B2_ENSG00000255307.1	0.999999999999989
prom	chr11_gencode_OR52B4_ENSG00000221996.2	0.101004393870119
prom	chr11_gencode_OR52B6_ENSG00000187747.2	0.742821646791575
prom	chr11_gencode_OR52D1_ENSG00000181609.5	0.557969065109806
prom	chr11_gencode_OR52E2_ENSG00000176787.2	0.170962690022508
prom	chr11_gencode_OR52E4_ENSG00000180974.2	0.283155368639887
prom	chr11_gencode_OR52E6_ENSG00000205409.3	0.255541864997256
prom	chr11_gencode_OR52E8_ENSG00000183269.5	0.00164841095493053
prom	chr11_gencode_OR52H1_ENSG00000181616.7	0.26907171006564
prom	chr11_gencode_OR52I1_ENSG00000232268.4	0.754813411844747
prom	chr11_gencode_OR52I2_ENSG00000226288.1	0.00410016217690393
prom	chr11_gencode_OR52J3_ENSG00000205495.1	0.649442229147727
prom	chr11_gencode_OR52K1_ENSG00000196778.2	0.457999670259848
prom	chr11_gencode_OR52K2_ENSG00000181963.5	0.649502866875823
prom	chr11_gencode_OR52L1_ENSG00000183313.4	0.0937419938642271
prom	chr11_gencode_OR52M1_ENSG00000197790.1	0.16989765510879
prom	chr11_gencode_OR52N1_ENSG00000181001.1	0.0184388291713237
prom	chr11_gencode_OR52N2_ENSG00000180988.2	0.594947735692162
prom	chr11_gencode_OR52N4_ENSG00000181074.3	0.00550043558527201
prom	chr11_gencode_OR52N5_ENSG00000181009.4	0.834356867084594
prom	chr11_gencode_OR52R1_ENSG00000176937.8	0.199104046812242
prom	chr11_gencode_OR52W1_ENSG00000175485.2	0.356468187043269
prom	chr11_gencode_OR56A1_ENSG00000180934.5	0.00583213027193685
prom	chr11_gencode_OR56A3_ENSG00000184478.6	0.828592598442085
prom	chr11_gencode_OR56A4_ENSG00000183389.4	0.32373478848012
prom	chr11_gencode_OR56B1_ENSG00000181023.5	0.197744928725266
prom	chr11_gencode_OR56B3P_ENSG00000180913.2	0.698229209445649
prom	chr11_gencode_OR56B4_ENSG00000180919.3	0.704443861641838
prom	chr11_gencode_OR5A1_ENSG00000172320.2	0.532813732823686
prom	chr11_gencode_OR5A2_ENSG00000172324.4	0.463256212697425
prom	chr11_gencode_OR5AK2_ENSG00000181273.2	1
prom	chr11_gencode_OR5AN1_ENSG00000176495.2	0.536830531190982
prom	chr11_gencode_OR5AP2_ENSG00000172464.2	0.840433413551841
prom	chr11_gencode_OR5AR1_ENSG00000172459.2	0.875363631818471
prom	chr11_gencode_OR5AS1_ENSG00000181785.1	0.928473687507777
prom	chr11_gencode_OR5B12_ENSG00000172362.2	0.0769529499759237
prom	chr11_gencode_OR5B17_ENSG00000197786.3	0.468662418740665
prom	chr11_gencode_OR5B21_ENSG00000198283.2	0.892085755946776
prom	chr11_gencode_OR5B2_ENSG00000172365.2	0.841612018187344
prom	chr11_gencode_OR5B3_ENSG00000172769.2	0.165597923659987
prom	chr11_gencode_OR5D13_ENSG00000198877.1	0.29988966182406
prom	chr11_gencode_OR5D14_ENSG00000186113.1	0.399888257614193
prom	chr11_gencode_OR5D16_ENSG00000205029.1	0.00524563861359687
prom	chr11_gencode_OR5D18_ENSG00000186119.6	0.665290286686813
prom	chr11_gencode_OR5F1_ENSG00000149133.1	0.46296884717729
prom	chr11_gencode_OR5I1_ENSG00000167825.3	0.695285480816835
prom	chr11_gencode_OR5J2_ENSG00000174957.1	0.00388936080626296
prom	chr11_gencode_OR5L1_ENSG00000186117.2	0.827640288769727
prom	chr11_gencode_OR5L2_ENSG00000205030.1	0.137559037946154
prom	chr11_gencode_OR5M10_ENSG00000254834.2	0.18987962770706
prom	chr11_gencode_OR5M11_ENSG00000255223.2	0.140937192094997
prom	chr11_gencode_OR5M1_ENSG00000255012.1	0.373287254233219
prom	chr11_gencode_OR5M3_ENSG00000174937.2	0.278942723714728
prom	chr11_gencode_OR5M8_ENSG00000181371.2	0.14673408790396
prom	chr11_gencode_OR5M9_ENSG00000150269.1	0.999999999999939
prom	chr11_gencode_OR5P2_ENSG00000183303.2	0.173765542417538
prom	chr11_gencode_OR5P3_ENSG00000182334.1	0.0772268650282652
prom	chr11_gencode_OR5R1_ENSG00000174942.1	0.117034477001764
prom	chr11_gencode_OR5T1_ENSG00000181698.2	0.381596923433905
prom	chr11_gencode_OR5T2_ENSG00000181718.4	0.720910829425061
prom	chr11_gencode_OR5T3_ENSG00000172489.5	0.00254872926211527
prom	chr11_gencode_OR5W2_ENSG00000187612.1	0.139646851164863
prom	chr11_gencode_OR6A2_ENSG00000184933.3	0.73441934099613
prom	chr11_gencode_OR6M1_ENSG00000196099.4	0.405609063542472
prom	chr11_gencode_OR6Q1_ENSG00000172381.3	0.999999999999941
prom	chr11_gencode_OR6T1_ENSG00000181499.2	0.583370489561472
prom	chr11_gencode_OR6X1_ENSG00000221931.2	0.050474411821706
prom	chr11_gencode_OR8A1_ENSG00000196119.5	0.328049271787097
prom	chr11_gencode_OR8B12_ENSG00000170953.2	0.478387559975499
prom	chr11_gencode_OR8B2_ENSG00000204293.2	0.61452294641157
prom	chr11_gencode_OR8B3_ENSG00000196661.3	0.543219292636168
prom	chr11_gencode_OR8B4_ENSG00000198657.3	0.279798635775823
prom	chr11_gencode_OR8B8_ENSG00000197125.2	0.744586276840326
prom	chr11_gencode_OR8D1_ENSG00000196341.2	0.0118778880347402
prom	chr11_gencode_OR8D2_ENSG00000197263.2	0.0460991090490651
prom	chr11_gencode_OR8D4_ENSG00000181518.2	0.0798995552663174
prom	chr11_gencode_OR8G1_ENSG00000197849.4	0.691655607019114
prom	chr11_gencode_OR8G5_ENSG00000255298.2	0.112375392506128
prom	chr11_gencode_OR8H1_ENSG00000181693.6	0.00810713770373497
prom	chr11_gencode_OR8H2_ENSG00000181767.1	0.0160554830453383
prom	chr11_gencode_OR8H3_ENSG00000181761.5	0.000426738188829859
prom	chr11_gencode_OR8I2_ENSG00000172154.4	0.359869870656787
prom	chr11_gencode_OR8J1_ENSG00000172487.3	0.553957270042339
prom	chr11_gencode_OR8J3_ENSG00000167822.1	0.0880436819484165
prom	chr11_gencode_OR8K1_ENSG00000150261.2	0.435642131100817
prom	chr11_gencode_OR8K3_ENSG00000181689.1	0.52931810098851
prom	chr11_gencode_OR8K5_ENSG00000181752.3	3.14296361746977e-05
prom	chr11_gencode_OR8U1_ENSG00000172199.1	0.396071076026815
prom	chr11_gencode_OR9G1_ENSG00000174914.1	0.000306739219387923
prom	chr11_gencode_OR9G4_ENSG00000172457.5	0.941072026847725
prom	chr11_gencode_OR9I1_ENSG00000172377.1	0.625573916674844
prom	chr11_gencode_OR9Q1_ENSG00000186509.3	0.999999999999927
prom	chr11_gencode_OR9Q2_ENSG00000186513.2	0.0756493497790175
prom	chr11_gencode_ORAOV1_ENSG00000149716.8	0.455695430170246
prom	chr11_gencode_OSBPL5_ENSG00000021762.15	0.188486487866253
prom	chr11_gencode_OSBP_ENSG00000110048.7	0.681540044157047
prom	chr11_gencode_OTOG_ENSG00000188162.6	0.736726409948459
prom	chr11_gencode_OTUB1_ENSG00000167770.7	0.703572367735825
prom	chr11_gencode_OVCH2_ENSG00000183378.7	0.978614699778094
prom	chr11_gencode_OVOL1_ENSG00000172818.5	0.8696176355593
prom	chr11_gencode_P2RX3_ENSG00000109991.4	0.56562426718667
prom	chr11_gencode_P2RY2_ENSG00000175591.7	0.999999999999965
prom	chr11_gencode_P2RY6_ENSG00000171631.10	0.507363973680787
prom	chr11_gencode_P4HA3_ENSG00000149380.7	0.653440980160325
prom	chr11_gencode_PAAF1_ENSG00000175575.8	0.000114946952481154
prom	chr11_gencode_PACS1_ENSG00000175115.7	0.832331618525623
prom	chr11_gencode_PACSIN3_ENSG00000165912.11	0.977574971372413
prom	chr11_gencode_PAFAH1B2_ENSG00000168092.9	0.472595367697378
prom	chr11_gencode_PAK1_ENSG00000149269.5	0.478582171690387
prom	chr11_gencode_PAMR1_ENSG00000149090.7	0.173624163882509
prom	chr11_gencode_PANX1_ENSG00000110218.4	0.795928784161034
prom	chr11_gencode_PANX3_ENSG00000154143.2	0.822871253741653
prom	chr11_gencode_PARVA_ENSG00000197702.7	0.438131772149892
prom	chr11_gencode_PATE1_ENSG00000171053.5	0.217806437534989
prom	chr11_gencode_PATE2_ENSG00000196844.4	0.361238588680388
prom	chr11_gencode_PATE3_ENSG00000236027.2	0.650598598451963
prom	chr11_gencode_PATE4_ENSG00000237353.2	0.630337576722116
prom	chr11_gencode_PATL1_ENSG00000166889.13	0.999999999999994
prom	chr11_gencode_PAX6_ENSG00000007372.16	0.979008381235784
prom	chr11_gencode_PCF11_ENSG00000165494.6	0.124579702425036
prom	chr11_gencode_PCNXL3_ENSG00000197136.4	0.0411859193759079
prom	chr11_gencode_PCSK7_ENSG00000160613.8	0.924728711610788
prom	chr11_gencode_PC_ENSG00000173599.9	0.207290503658601
prom	chr11_gencode_PDDC1_ENSG00000177225.12	0.918323772690296
prom	chr11_gencode_PDE2A_ENSG00000186642.11	0.94886396516821
prom	chr11_gencode_PDE3B_ENSG00000152270.4	0.611625930251668
prom	chr11_gencode_PDGFD_ENSG00000170962.8	0.667387751878841
prom	chr11_gencode_PDHX_ENSG00000110435.7	0.606814556603238
prom	chr11_gencode_PDZD3_ENSG00000172367.11	0.138074908446987
prom	chr11_gencode_PELI3_ENSG00000174516.10	0.295488818346584
prom	chr11_gencode_PEX16_ENSG00000121680.11	0.00742194695436902
prom	chr11_gencode_PGA3_ENSG00000229859.4	0.727557330393241
prom	chr11_gencode_PGA4_ENSG00000229183.4	0.992988699304535
prom	chr11_gencode_PGA5_ENSG00000256713.3	0.941591902711407
prom	chr11_gencode_PGAP2_ENSG00000148985.15	0.274342984736013
prom	chr11_gencode_PGM2L1_ENSG00000165434.6	0.499811740957415
prom	chr11_gencode_PGR_ENSG00000082175.10	0.172088981628794
prom	chr11_gencode_PHF21A_ENSG00000135365.11	0.999999999999891
prom	chr11_gencode_PHLDA2_ENSG00000181649.5	0.725388962733413
prom	chr11_gencode_PHLDB1_ENSG00000019144.12	0.982087463728946
prom	chr11_gencode_PHOX2A_ENSG00000165462.5	0.735524776736049
prom	chr11_gencode_PHRF1_ENSG00000070047.7	0.930767904085771
prom	chr11_gencode_PICALM_ENSG00000073921.13	0.846388862717975
prom	chr11_gencode_PIDD_ENSG00000177595.13	0.99999999999998
prom	chr11_gencode_PIH1D2_ENSG00000150773.6	1
prom	chr11_gencode_PIK3C2A_ENSG00000011405.9	0.94555276005896
prom	chr11_gencode_PITPNM1_ENSG00000110697.8	0.991240476059904
prom	chr11_gencode_PIWIL4_ENSG00000134627.7	0.00696373460736793
prom	chr11_gencode_PKNOX2_ENSG00000165495.11	0.997122432195212
prom	chr11_gencode_PKP3_ENSG00000184363.5	0.362644471588765
prom	chr11_gencode_PLA2G16_ENSG00000176485.6	0.773774795917
prom	chr11_gencode_PLAC1L_ENSG00000149507.2	0.470563780733742
prom	chr11_gencode_PLCB3_ENSG00000149782.7	0.129299403495343
prom	chr11_gencode_PLEKHA7_ENSG00000166689.10	1
prom	chr11_gencode_PLEKHB1_ENSG00000021300.9	0.484187001795125
prom	chr11_gencode_PNPLA2_ENSG00000177666.11	1
prom	chr11_gencode_POLA2_ENSG00000014138.4	0.871311461198086
prom	chr11_gencode_POLD3_ENSG00000077514.4	0.0210246593916129
prom	chr11_gencode_POLD4_ENSG00000175482.4	0.556158637816272
prom	chr11_gencode_POLR2G_ENSG00000168002.7	0.378316014957968
prom	chr11_gencode_POLR2L_ENSG00000177700.5	0.401078721979229
prom	chr11_gencode_POU2AF1_ENSG00000110777.7	0.412494030245228
prom	chr11_gencode_POU2F3_ENSG00000137709.5	0.932205060280473
prom	chr11_gencode_PPFIA1_ENSG00000131626.11	0.899146499083571
prom	chr11_gencode_PPFIBP2_ENSG00000166387.7	0.870589519601612
prom	chr11_gencode_PPME1_ENSG00000214517.4	0.588255847617936
prom	chr11_gencode_PPP1CA_ENSG00000172531.10	0.142161846749714
prom	chr11_gencode_PPP1R14B_ENSG00000173457.6	0.895245103628006
prom	chr11_gencode_PPP1R32_ENSG00000162148.6	0.896395152587423
prom	chr11_gencode_PPP2R1B_ENSG00000137713.11	0.860164946635658
prom	chr11_gencode_PPP2R5B_ENSG00000068971.9	0.733480896172156
prom	chr11_gencode_PPP6R3_ENSG00000110075.10	0.662820544149737
prom	chr11_gencode_PRCP_ENSG00000137509.6	0.939366254023463
prom	chr11_gencode_PRDM10_ENSG00000170325.10	0.939993691674547
prom	chr11_gencode_PRDM11_ENSG00000019485.8	0.98193537923035
prom	chr11_gencode_PRDX5_ENSG00000126432.9	0.999999999999998
prom	chr11_gencode_PRG2_ENSG00000186652.5	0.184167941763587
prom	chr11_gencode_PRG3_ENSG00000156575.2	0.00689645767665135
prom	chr11_gencode_PRKCDBP_ENSG00000170955.9	0.999999999999981
prom	chr11_gencode_PRKRIR_ENSG00000137492.3	0.99999999999999
prom	chr11_gencode_PRMT3_ENSG00000185238.8	0.504705692610081
prom	chr11_gencode_PRPF19_ENSG00000110107.4	0.933832098819238
prom	chr11_gencode_PRR5L_ENSG00000135362.9	0.0345782853367928
prom	chr11_gencode_PRRG4_ENSG00000135378.3	0.922272243637618
prom	chr11_gencode_PRSS23_ENSG00000150687.7	0.875092957885824
prom	chr11_gencode_PSMA1_ENSG00000129084.13	0.364002369469891
prom	chr11_gencode_PSMC3_ENSG00000165916.4	0.05535369608035
prom	chr11_gencode_PSMD13_ENSG00000185627.13	1
prom	chr11_gencode_PTDSS2_ENSG00000174915.7	1
prom	chr11_gencode_PTGDR2_ENSG00000183134.4	0.644173696578072
prom	chr11_gencode_PTH_ENSG00000152266.2	0.656855482050593
prom	chr11_gencode_PTPMT1_ENSG00000110536.9	0.0862000690380917
prom	chr11_gencode_PTPN5_ENSG00000110786.13	0.699754296886417
prom	chr11_gencode_PTPRCAP_ENSG00000213402.2	0.0261512725999856
prom	chr11_gencode_PTPRJ_ENSG00000149177.8	0.999999999999938
prom	chr11_gencode_PTS_ENSG00000150787.3	0.832474344345901
prom	chr11_gencode_PUS3_ENSG00000110060.4	0.836246476115986
prom	chr11_gencode_PVRL1_ENSG00000110400.6	1
prom	chr11_gencode_PYGM_ENSG00000068976.9	0.448324357063903
prom	chr11_gencode_QSER1_ENSG00000060749.10	0.614452515813499
prom	chr11_gencode_RAB1B_ENSG00000174903.10	0.94295824021686
prom	chr11_gencode_RAB30_ENSG00000137502.5	0.485776068103237
prom	chr11_gencode_RAB38_ENSG00000123892.7	0.970316045265668
prom	chr11_gencode_RAB39A_ENSG00000179331.2	0.910524465642971
prom	chr11_gencode_RAB3IL1_ENSG00000167994.7	0.303703612016854
prom	chr11_gencode_RAB6A_ENSG00000175582.15	0.434730034605286
prom	chr11_gencode_RAD9A_ENSG00000172613.3	0.240429728427859
prom	chr11_gencode_RAG1_ENSG00000166349.5	0.999999999999927
prom	chr11_gencode_RAG2_ENSG00000175097.3	0.450438957783155
prom	chr11_gencode_RAPSN_ENSG00000165917.5	0.474328693208869
prom	chr11_gencode_RARRES3_ENSG00000133321.6	0.624962089378765
prom	chr11_gencode_RASGRP2_ENSG00000068831.14	0.962356027218765
prom	chr11_gencode_RASSF7_ENSG00000099849.10	0.125205150068783
prom	chr11_gencode_RBM14-RBM4_ENSG00000248643.5	0.376252146620579
prom	chr11_gencode_RBM14_ENSG00000239306.4	0.45423360144271
prom	chr11_gencode_RBM4B_ENSG00000173914.7	0.294796012714843
prom	chr11_gencode_RBM4_ENSG00000173933.15	0.185541807145976
prom	chr11_gencode_RBM7_ENSG00000076053.6	0.673138749058817
prom	chr11_gencode_RBMXL2_ENSG00000170748.5	0.170743207099358
prom	chr11_gencode_RCE1_ENSG00000173653.3	0.999999999999955
prom	chr11_gencode_RCN1_ENSG00000049449.4	0.881681584620608
prom	chr11_gencode_RCOR2_ENSG00000167771.5	0.999999999999939
prom	chr11_gencode_RDX_ENSG00000137710.10	0.357788375459436
prom	chr11_gencode_RELA_ENSG00000173039.14	0.829295179914077
prom	chr11_gencode_RELT_ENSG00000054967.8	0.629548417958535
prom	chr11_gencode_REXO2_ENSG00000076043.5	0.232095448869516
prom	chr11_gencode_RHOD_ENSG00000173156.2	0.211733543178461
prom	chr11_gencode_RHOG_ENSG00000177105.9	0.576397284866704
prom	chr11_gencode_RIC3_ENSG00000166405.10	0.222344678899374
prom	chr11_gencode_RIC8A_ENSG00000177963.8	0.397250864223352
prom	chr11_gencode_RIN1_ENSG00000174791.6	0.113018914011792
prom	chr11_gencode_RNASEH2C_ENSG00000172922.4	1
prom	chr11_gencode_RNF121_ENSG00000137522.13	0.0903673451593638
prom	chr11_gencode_RNF141_ENSG00000110315.2	0.626328949569074
prom	chr11_gencode_RNF169_ENSG00000166439.5	0.379719151464141
prom	chr11_gencode_RNF214_ENSG00000167257.6	0.931922398773238
prom	chr11_gencode_RNF26_ENSG00000173456.4	0.222609564976171
prom	chr11_gencode_RNH1_ENSG00000023191.12	0.986756809163176
prom	chr11_gencode_ROBO3_ENSG00000154134.10	0.595180511789226
prom	chr11_gencode_ROBO4_ENSG00000154133.10	0.0327051123817336
prom	chr11_gencode_ROM1_ENSG00000149489.4	0.736156004927612
prom	chr11_gencode_RP11-111M22.2_ENSG00000179240.4	0.999999999999952
prom	chr11_gencode_RP11-113D6.10_ENSG00000189332.4	0.362963104431532
prom	chr11_gencode_RP11-113D6.6_ENSG00000255470.1	0.0749675050717566
prom	chr11_gencode_RP11-1167A19.2_ENSG00000255038.1	1
prom	chr11_gencode_RP11-295K3.1_ENSG00000250644.1	0.564280695331546
prom	chr11_gencode_RP11-315O6.2_ENSG00000255482.1	0.630822667168875
prom	chr11_gencode_RP11-664I21.6_ENSG00000254943.1	0.299742513833945
prom	chr11_gencode_RP11-712L6.5_ENSG00000255062.1	0.999999999999902
prom	chr11_gencode_RP11-770J1.4_ENSG00000255384.1	0.999999999999923
prom	chr11_gencode_RP11-770J1.5_ENSG00000254873.1	0.308420845433382
prom	chr11_gencode_RP11-794P6.2_ENSG00000255093.1	0.509477240125812
prom	chr11_gencode_RP11-817J15.3_ENSG00000255798.1	0.160299660352327
prom	chr11_gencode_RP11-831H9.11_ENSG00000255432.1	0.726210477394743
prom	chr11_gencode_RP11-849H4.2_ENSG00000254469.3	0.152742968266382
prom	chr11_gencode_RP11-867G23.8_ENSG00000255468.2	0.569439963473918
prom	chr11_gencode_RP11-872D17.8_ENSG00000254979.1	1
prom	chr11_gencode_RPL27A_ENSG00000166441.8	0.587229807252176
prom	chr11_gencode_RPLP2_ENSG00000177600.4	0.40378498979036
prom	chr11_gencode_RPS13_ENSG00000110700.2	0.864977781264499
prom	chr11_gencode_RPS25_ENSG00000118181.6	0.999999999999991
prom	chr11_gencode_RPS3_ENSG00000149273.10	0.748321161430677
prom	chr11_gencode_RPS6KA4_ENSG00000162302.8	0.764516144887328
prom	chr11_gencode_RPS6KB2_ENSG00000175634.10	0.856521336200311
prom	chr11_gencode_RPUSD4_ENSG00000165526.4	0.631011749382817
prom	chr11_gencode_RRAS2_ENSG00000133818.8	0.333825608956226
prom	chr11_gencode_RRM1_ENSG00000167325.10	0.765122755242972
prom	chr11_gencode_RRP8_ENSG00000132275.6	0.801528198892948
prom	chr11_gencode_RSF1_ENSG00000048649.9	0.144951095748652
prom	chr11_gencode_RTN3_ENSG00000133318.9	0.913766580466394
prom	chr11_gencode_RTN4RL2_ENSG00000186907.3	0.975160709207278
prom	chr11_gencode_SAA1_ENSG00000173432.6	0.244002543019362
prom	chr11_gencode_SAA2_ENSG00000134339.4	0.32321632603957
prom	chr11_gencode_SAA4_ENSG00000148965.4	0.999999999999972
prom	chr11_gencode_SAAL1_ENSG00000166788.5	0.768218276307634
prom	chr11_gencode_SAC3D1_ENSG00000168061.9	0.275579869249627
prom	chr11_gencode_SART1_ENSG00000175467.10	0.498286582853442
prom	chr11_gencode_SBF2_ENSG00000133812.10	1
prom	chr11_gencode_SC5D_ENSG00000109929.5	0.560403301975769
prom	chr11_gencode_SCGB1A1_ENSG00000149021.2	0.0626735148898599
prom	chr11_gencode_SCGB1C1_ENSG00000188076.2	0.416355057073786
prom	chr11_gencode_SCGB1D1_ENSG00000168515.3	0.385524025996336
prom	chr11_gencode_SCGB1D2_ENSG00000124935.3	0.573770381914661
prom	chr11_gencode_SCGB1D4_ENSG00000197745.1	1
prom	chr11_gencode_SCGB2A1_ENSG00000124939.4	0.000894269889202559
prom	chr11_gencode_SCGB2A2_ENSG00000110484.6	0.487530656537087
prom	chr11_gencode_SCN2B_ENSG00000149575.5	0.204716411494868
prom	chr11_gencode_SCN3B_ENSG00000166257.4	0.859492802623179
prom	chr11_gencode_SCN4B_ENSG00000177098.4	0.188537181517835
prom	chr11_gencode_SCT_ENSG00000070031.3	0.703254285496119
prom	chr11_gencode_SCUBE2_ENSG00000175356.8	0.863665412651841
prom	chr11_gencode_SCYL1_ENSG00000142186.12	0.846586962629288
prom	chr11_gencode_SDHAF2_ENSG00000167985.2	0.220088984653464
prom	chr11_gencode_SDHD_ENSG00000204370.4	0.578637099162369
prom	chr11_gencode_SERGEF_ENSG00000129158.6	0.999999999999977
prom	chr11_gencode_SERPING1_ENSG00000149131.11	0.99999999999999
prom	chr11_gencode_SERPINH1_ENSG00000149257.9	0.344534713861794
prom	chr11_gencode_SESN3_ENSG00000149212.6	0.973474777316317
prom	chr11_gencode_SF1_ENSG00000168066.16	0.877615523676256
prom	chr11_gencode_SF3B2_ENSG00000087365.10	0.682091415438978
prom	chr11_gencode_SHANK2_ENSG00000162105.12	0.0597380498828546
prom	chr11_gencode_SIAE_ENSG00000110013.8	0.468977568115374
prom	chr11_gencode_SIDT2_ENSG00000149577.11	0.710190465943447
prom	chr11_gencode_SIGIRR_ENSG00000185187.8	0.999897352113603
prom	chr11_gencode_SIK2_ENSG00000170145.4	0.964651463833811
prom	chr11_gencode_SIK3_ENSG00000160584.11	0.157669794669981
prom	chr11_gencode_SIPA1_ENSG00000213445.4	0.405553696281046
prom	chr11_gencode_SIRT3_ENSG00000142082.10	0.539256339572438
prom	chr11_gencode_SLC15A3_ENSG00000110446.5	1
prom	chr11_gencode_SLC17A6_ENSG00000091664.7	0.94849747794579
prom	chr11_gencode_SLC1A2_ENSG00000110436.7	0.0934787178827122
prom	chr11_gencode_SLC22A10_ENSG00000184999.7	0.647383106426239
prom	chr11_gencode_SLC22A11_ENSG00000168065.11	0.399610970874721
prom	chr11_gencode_SLC22A12_ENSG00000197891.7	0.0109952081008954
prom	chr11_gencode_SLC22A18AS_ENSG00000254827.1	0.176388144105405
prom	chr11_gencode_SLC22A18_ENSG00000110628.9	0.999999999999911
prom	chr11_gencode_SLC22A24_ENSG00000197658.5	0.136860637763365
prom	chr11_gencode_SLC22A25_ENSG00000196600.8	0.034748522910801
prom	chr11_gencode_SLC22A6_ENSG00000197901.7	0.0698533142911412
prom	chr11_gencode_SLC22A8_ENSG00000149452.11	0.214890069532164
prom	chr11_gencode_SLC22A9_ENSG00000149742.5	0.699153170061271
prom	chr11_gencode_SLC25A22_ENSG00000177542.6	0.931682977126146
prom	chr11_gencode_SLC25A45_ENSG00000162241.8	0.64459213844446
prom	chr11_gencode_SLC29A2_ENSG00000174669.7	0.601482794512772
prom	chr11_gencode_SLC35C1_ENSG00000181830.7	0.749739064663157
prom	chr11_gencode_SLC35F2_ENSG00000110660.10	0.499650524201255
prom	chr11_gencode_SLC36A4_ENSG00000180773.10	0.733542382553642
prom	chr11_gencode_SLC37A2_ENSG00000134955.7	0.999999999999881
prom	chr11_gencode_SLC37A4_ENSG00000137700.12	0.821611293715667
prom	chr11_gencode_SLC39A13_ENSG00000165915.9	0.918376076785378
prom	chr11_gencode_SLC3A2_ENSG00000168003.12	0.443154623425735
prom	chr11_gencode_SLC43A1_ENSG00000149150.4	0.637466976154002
prom	chr11_gencode_SLC43A3_ENSG00000134802.13	0.967287819573355
prom	chr11_gencode_SLC5A12_ENSG00000148942.10	1
prom	chr11_gencode_SLC6A5_ENSG00000165970.7	0.549804333037071
prom	chr11_gencode_SLCO2B1_ENSG00000137491.10	0.0400375842639558
prom	chr11_gencode_SLN_ENSG00000170290.3	0.242012595133606
prom	chr11_gencode_SMCO4_ENSG00000166002.2	0.998671757964381
prom	chr11_gencode_SMPD1_ENSG00000166311.5	0.999999999999927
prom	chr11_gencode_SMTNL1_ENSG00000214872.4	0.274525513656262
prom	chr11_gencode_SNX15_ENSG00000110025.8	0.293262488112031
prom	chr11_gencode_SNX19_ENSG00000120451.6	0.894029076479475
prom	chr11_gencode_SNX32_ENSG00000172803.13	0.711122715685507
prom	chr11_gencode_SORL1_ENSG00000137642.8	0.517875657849204
prom	chr11_gencode_SOX6_ENSG00000110693.11	0.86211698231255
prom	chr11_gencode_SPA17_ENSG00000064199.2	0.560515163356952
prom	chr11_gencode_SPATA19_ENSG00000166118.3	0.000728757356393145
prom	chr11_gencode_SPCS2_ENSG00000118363.7	0.733892622387714
prom	chr11_gencode_SPDYC_ENSG00000204710.2	0.514334977568592
prom	chr11_gencode_SPI1_ENSG00000066336.7	0.373841591462159
prom	chr11_gencode_SPTBN2_ENSG00000173898.7	0.863189095031664
prom	chr11_gencode_SPTY2D1_ENSG00000179119.10	1
prom	chr11_gencode_SRPR_ENSG00000182934.7	0.521899130740612
prom	chr11_gencode_SSH3_ENSG00000172830.8	0.659250167350406
prom	chr11_gencode_SSRP1_ENSG00000149136.3	1
prom	chr11_gencode_SSSCA1_ENSG00000173465.3	0.847635840145927
prom	chr11_gencode_ST14_ENSG00000149418.6	0.360736039146546
prom	chr11_gencode_ST3GAL4_ENSG00000110080.14	0.793376404413065
prom	chr11_gencode_ST5_ENSG00000166444.13	0.964619680360049
prom	chr11_gencode_STARD10_ENSG00000214530.3	0.730139111802979
prom	chr11_gencode_STIM1_ENSG00000167323.5	0.913642821140141
prom	chr11_gencode_STIP1_ENSG00000168439.12	0.796562400964881
prom	chr11_gencode_STK33_ENSG00000130413.11	0.709087882105962
prom	chr11_gencode_STT3A_ENSG00000134910.8	0.488248366008747
prom	chr11_gencode_STX3_ENSG00000166900.10	0.947929489593225
prom	chr11_gencode_STX5_ENSG00000162236.7	0.676683712392754
prom	chr11_gencode_SUV420H1_ENSG00000110066.10	0.84676440650104
prom	chr11_gencode_SVIP_ENSG00000198168.4	0.890087454615303
prom	chr11_gencode_SWAP70_ENSG00000133789.10	0.868895926505207
prom	chr11_gencode_SYT12_ENSG00000173227.9	0.540106187275607
prom	chr11_gencode_SYT13_ENSG00000019505.3	0.856967152073286
prom	chr11_gencode_SYT7_ENSG00000011347.5	0.931439646236565
prom	chr11_gencode_SYT8_ENSG00000149043.12	0.986214992844446
prom	chr11_gencode_SYT9_ENSG00000170743.12	0.941504899820484
prom	chr11_gencode_SYTL2_ENSG00000137501.12	0.114033478335031
prom	chr11_gencode_SYVN1_ENSG00000162298.12	0.215310492293196
prom	chr11_gencode_TAF10_ENSG00000166337.5	0.0298760989756886
prom	chr11_gencode_TAF1D_ENSG00000166012.10	0.999999999999952
prom	chr11_gencode_TAF6L_ENSG00000162227.3	0.757101935031727
prom	chr11_gencode_TAGLN_ENSG00000149591.12	0.964075358015926
prom	chr11_gencode_TALDO1_ENSG00000177156.6	0.574379739819054
prom	chr11_gencode_TBC1D10C_ENSG00000175463.7	0.331810718089812
prom	chr11_gencode_TBCEL_ENSG00000154114.8	0.758663389998723
prom	chr11_gencode_TBRG1_ENSG00000154144.8	0.708385146325788
prom	chr11_gencode_TBX10_ENSG00000167800.9	0.0648541499698577
prom	chr11_gencode_TCIRG1_ENSG00000110719.5	0.89656729820194
prom	chr11_gencode_TCN1_ENSG00000134827.3	0.551179544537026
prom	chr11_gencode_TCP11L1_ENSG00000176148.11	0.106587066927511
prom	chr11_gencode_TEAD1_ENSG00000187079.10	0.499419278083696
prom	chr11_gencode_TECTA_ENSG00000109927.5	0.288590419220208
prom	chr11_gencode_TENM4_ENSG00000149256.10	0.927333203065603
prom	chr11_gencode_TEX12_ENSG00000150783.5	0.234045628691179
prom	chr11_gencode_TEX40_ENSG00000219435.3	0.607092427060183
prom	chr11_gencode_THRSP_ENSG00000151365.2	0.0754224799598609
prom	chr11_gencode_THY1_ENSG00000154096.9	0.804233779009632
prom	chr11_gencode_THYN1_ENSG00000151500.10	0.250276592837647
prom	chr11_gencode_TH_ENSG00000180176.10	0.982783209688362
prom	chr11_gencode_TIGD3_ENSG00000173825.6	0.999999999999928
prom	chr11_gencode_TIMM10B_ENSG00000132286.7	0.188815486904779
prom	chr11_gencode_TIMM10_ENSG00000134809.4	0.469790257502938
prom	chr11_gencode_TIMM8B_ENSG00000150779.7	0.500062265655146
prom	chr11_gencode_TIRAP_ENSG00000150455.9	0.556707665814213
prom	chr11_gencode_TM7SF2_ENSG00000149809.10	0.538423312969061
prom	chr11_gencode_TMEM109_ENSG00000110108.5	0.958254451153037
prom	chr11_gencode_TMEM123_ENSG00000152558.10	0.573561235654896
prom	chr11_gencode_TMEM126A_ENSG00000171202.2	0.581900582998008
prom	chr11_gencode_TMEM126B_ENSG00000171204.8	0.817414305825828
prom	chr11_gencode_TMEM132A_ENSG00000006118.10	0.892625222361371
prom	chr11_gencode_TMEM133_ENSG00000170647.2	1
prom	chr11_gencode_TMEM134_ENSG00000172663.4	0.856592346480591
prom	chr11_gencode_TMEM135_ENSG00000166575.12	0.774659910829014
prom	chr11_gencode_TMEM136_ENSG00000181264.4	0.603683029215518
prom	chr11_gencode_TMEM138_ENSG00000149483.7	0.79666403368685
prom	chr11_gencode_TMEM151A_ENSG00000179292.4	0.999999999999977
prom	chr11_gencode_TMEM179B_ENSG00000185475.4	1
prom	chr11_gencode_TMEM216_ENSG00000187049.5	0.311046748413309
prom	chr11_gencode_TMEM218_ENSG00000150433.5	0.744262186608136
prom	chr11_gencode_TMEM223_ENSG00000168569.7	0.169606061153621
prom	chr11_gencode_TMEM225_ENSG00000204300.2	0.162060102462036
prom	chr11_gencode_TMEM258_ENSG00000134825.9	0.999999999999941
prom	chr11_gencode_TMEM25_ENSG00000149582.11	0.486964560811069
prom	chr11_gencode_TMEM41B_ENSG00000166471.6	0.87646879142722
prom	chr11_gencode_TMEM45B_ENSG00000151715.3	0.0984447733250501
prom	chr11_gencode_TMEM80_ENSG00000177042.10	0.999999999999981
prom	chr11_gencode_TMEM86A_ENSG00000151117.4	0.985143632314212
prom	chr11_gencode_TMEM9B_ENSG00000175348.6	0.689975639790144
prom	chr11_gencode_TMPRSS13_ENSG00000137747.10	0.650750398471977
prom	chr11_gencode_TMPRSS4_ENSG00000137648.12	0.151395596776141
prom	chr11_gencode_TMPRSS5_ENSG00000166682.6	0.789964627334349
prom	chr11_gencode_TMX2_ENSG00000213593.5	0.161917444250163
prom	chr11_gencode_TNKS1BP1_ENSG00000149115.9	0.509840089892901
prom	chr11_gencode_TNNI2_ENSG00000130598.11	0.21921269575897
prom	chr11_gencode_TNNT3_ENSG00000130595.12	0.374683806508932
prom	chr11_gencode_TOLLIP_ENSG00000078902.11	0.0278534012892428
prom	chr11_gencode_TP53AIP1_ENSG00000120471.10	0.0826847417485862
prom	chr11_gencode_TP53I11_ENSG00000175274.14	0.812254100863527
prom	chr11_gencode_TPBGL_ENSG00000261594.3	0.794314608222519
prom	chr11_gencode_TPCN2_ENSG00000162341.11	0.060765787293081
prom	chr11_gencode_TPH1_ENSG00000129167.5	0.285933868384584
prom	chr11_gencode_TPP1_ENSG00000166340.10	0.999999999999996
prom	chr11_gencode_TRAF6_ENSG00000175104.10	1
prom	chr11_gencode_TRAPPC4_ENSG00000196655.5	0.999999999999974
prom	chr11_gencode_TREH_ENSG00000118094.7	0.0801215831677225
prom	chr11_gencode_TRIM21_ENSG00000132109.8	0.891439444364253
prom	chr11_gencode_TRIM22_ENSG00000132274.11	0.44593247809256
prom	chr11_gencode_TRIM29_ENSG00000137699.12	0.00751303805449385
prom	chr11_gencode_TRIM34_ENSG00000258659.2	0.691467963972252
prom	chr11_gencode_TRIM3_ENSG00000110171.14	0.613081161769147
prom	chr11_gencode_TRIM44_ENSG00000166326.5	0.999999999999945
prom	chr11_gencode_TRIM48_ENSG00000150244.8	0.0173140240335509
prom	chr11_gencode_TRIM49B_ENSG00000182053.8	0.000879342838877848
prom	chr11_gencode_TRIM49C_ENSG00000204449.2	0.357839516602428
prom	chr11_gencode_TRIM49D1_ENSG00000223417.4	0.115580173224835
prom	chr11_gencode_TRIM49_ENSG00000168930.9	0.764437083351698
prom	chr11_gencode_TRIM51_ENSG00000124900.8	0.0569387132028193
prom	chr11_gencode_TRIM5_ENSG00000132256.14	0.758551818308792
prom	chr11_gencode_TRIM6-TRIM34_ENSG00000258588.2	0.178538477936724
prom	chr11_gencode_TRIM64B_ENSG00000189253.7	0.733430035760063
prom	chr11_gencode_TRIM64C_ENSG00000214891.4	0.314389868459034
prom	chr11_gencode_TRIM66_ENSG00000166436.11	0.554458992884416
prom	chr11_gencode_TRIM68_ENSG00000167333.8	0.765771344726553
prom	chr11_gencode_TRIM6_ENSG00000121236.15	0.50089199126522
prom	chr11_gencode_TRIM77_ENSG00000214414.5	0.583118151938696
prom	chr11_gencode_TRMT112_ENSG00000173113.2	0.999999999999995
prom	chr11_gencode_TRPC6_ENSG00000137672.8	0.743729920189972
prom	chr11_gencode_TRPM5_ENSG00000070985.9	0.318338037732126
prom	chr11_gencode_TRPT1_ENSG00000149743.9	0.0309408011246895
prom	chr11_gencode_TSG101_ENSG00000074319.8	0.377580330770515
prom	chr11_gencode_TSKU_ENSG00000182704.6	0.937012415026439
prom	chr11_gencode_TSPAN18_ENSG00000157570.7	0.754162424448842
prom	chr11_gencode_TSPAN32_ENSG00000064201.11	0.282169262672615
prom	chr11_gencode_TSPAN4_ENSG00000214063.6	0.575483566611357
[truncated: 35,025 more rows]
