# Supplementary material for: Non-coding cancer driver candidates identified with a sample- and position-specific model of the somatic mutation rate
Source: eLife journal article supplement (doi:10.7554/elife.21778), 2017-03-31
Supplement: supp [file elife-21778-supp-v2.zip › elife_poa_e21778_Figure_6_source_data_1.txt]

uracil_DNA_glycosylase_deficiency_signature_statistic	cancer_type	SMUG1_mutation_status
0.288624314017301	BLCA	0
0.405416439847578	BLCA	0
0.34421875	BLCA	0
0.284055551339455	BLCA	0
0.313408142713279	BLCA	0
0.362190082644628	BLCA	0
0.276672332766723	BLCA	0
0.367931922517075	BLCA	0
0.423598097160156	BLCA	1
0.251823296520108	BLCA	0
0.372226572696424	BLCA	0
0.350983842585186	BLCA	0
0.247775606391539	BLCA	0
0.318933887158186	BLCA	1
0.313286231259693	BLCA	0
0.263768284865085	BLCA	0
0.185965848452508	BLCA	0
0.228240120801162	BLCA	0
0.269829699821085	BLCA	0
0.380851730076718	BLCA	0
0.432220316281693	BLCA	0
0.231719876416066	BRCA	0
0.3367641956748	BRCA	0
0.177194914405846	BRCA	0
0.174713507420627	BRCA	0
0.17947835069295	BRCA	0
0.244019138755981	BRCA	0
0.185954816709292	BRCA	0
0.365714285714286	BRCA	0
0.277952855161982	BRCA	0
0.286908841672378	BRCA	0
0.241473396998636	BRCA	0
0.319078218479947	BRCA	0
0.254285959197668	BRCA	1
0.220566037735849	BRCA	0
0.304867256637168	BRCA	0
0.316348423085175	BRCA	0
0.272396780057128	BRCA	0
0.285352112676056	BRCA	0
0.186589208349744	BRCA	0
0.200340280731604	BRCA	0
0.214977277217941	BRCA	0
0.202323330106486	BRCA	0
0.207110665998998	BRCA	0
0.169670602858919	BRCA	0
0.277964759453574	BRCA	0
0.176169341072038	BRCA	0
0.29541566883339	BRCA	0
0.190879926672777	BRCA	0
0.210695432637136	BRCA	0
0.287532923617208	BRCA	0
0.208279430789133	BRCA	0
0.196243093922652	BRCA	0
0.271392405063291	BRCA	0
0.427023654206138	BRCA	0
0.269417475728155	BRCA	0
0.246244284781189	BRCA	0
0.193404634581105	BRCA	0
0.228576615831518	BRCA	0
0.200202516996962	BRCA	0
0.193968871595331	BRCA	0
0.162190406521058	BRCA	0
0.192327766179541	BRCA	0
0.19644723092999	BRCA	0
0.209765347238682	BRCA	0
0.210736468500444	BRCA	0
0.232234432234432	BRCA	0
0.193816631130064	BRCA	0
0.230275575688939	BRCA	0
0.397006730428622	BRCA	0
0.195765702187721	BRCA	0
0.203415369161226	BRCA	0
0.218415417558887	BRCA	0
0.236368003843382	BRCA	0
0.196854723413615	BRCA	0
0.170484436650592	BRCA	0
0.235980429055326	BRCA	0
0.207064935064935	BRCA	0
0.421491431218157	BRCA	0
0.23447401774398	BRCA	0
0.191728502837189	BRCA	0
0.304888352444176	BRCA	0
0.210184182015168	BRCA	0
0.313504417332772	BRCA	0
0.244950422328314	BRCA	0
0.218410920546027	BRCA	0
0.221508828250401	BRCA	0
0.257393913416202	BRCA	0
0.215568862275449	BRCA	0
0.279322512350035	BRCA	0
0.207466757586089	BRCA	0
0.232792903028449	BRCA	0
0.50183703256329	BRCA	0
0.299908310410936	BRCA	0
0.196235215725471	BRCA	0
0.185376999238385	BRCA	0
0.235708982925019	BRCA	0
0.212320428536645	BRCA	0
0.276178767717674	BRCA	0
0.18932527693857	BRCA	0
0.207224596718599	BRCA	0
0.223070097604259	BRCA	0
0.18604898828541	BRCA	0
0.225511536787114	BRCA	0
0.203081934352293	BRCA	0
0.213421052631579	BRCA	0
0.167147834743654	BRCA	0
0.189270644966848	BRCA	0
0.185296941434645	BRCA	0
0.17103000191095	BRCA	0
0.215163934426229	BRCA	0
0.240487702333403	BRCA	0
0.226421188630491	BRCA	0
0.173396086202626	BRCA	0
0.217201695941853	BRCA	0
0.204071115691832	BRCA	0
0.178743961352657	BRCA	0
0.157300572756703	CRC	0
0.163610212153901	CRC	0
0.122104104019313	CRC	0
0.178420775112049	CRC	0
0.174172402490987	CRC	0
0.221947746614126	CRC	0
0.212316576355654	CRC	0
0.155852802324174	CRC	0
0.173090454225627	CRC	0
0.142077820184866	CRC	0
0.17419759727452	CRC	0
0.137450817974736	CRC	0
0.166609395709587	CRC	0
0.124204219198602	CRC	0
0.160146699266504	CRC	0
0.167721518987342	CRC	0
0.144001378003617	CRC	0
0.168222136521404	CRC	1
0.173640671432014	CRC	0
0.164207137107593	CRC	0
0.168001643047854	CRC	0
0.152677743706767	CRC	0
0.124189089543294	CRC	1
0.152317546779644	CRC	0
0.169238709677419	CRC	0
0.15735830294995	CRC	0
0.190334629163808	CRC	0
0.11719409604606	CRC	0
0.241113596818295	CRC	0
0.107745474545994	CRC	0
0.0844216710237315	CRC	1
0.244236517940602	CRC	0
0.183655483926608	CRC	1
0.320720965514118	CRC	0
0.210996375875584	CRC	0
0.176327163914441	CRC	0
0.17475878039367	CRC	0
0.127592134952187	CRC	0
0.176493788207454	CRC	0
0.135203967651133	CRC	0
0.179613398967463	CRC	0
0.166617879515251	CRC	0
0.184480676328502	GBM	0
0.191787439613527	GBM	0
0.16794380587484	GBM	0
0.1996640537514	GBM	0
0.177250230685345	GBM	0
0.179852146088492	GBM	0
0.209329860288894	GBM	0
0.133716345612256	GBM	0
0.175811501071017	GBM	0
0.188432523051132	GBM	0
0.15841020384922	GBM	1
0.158781785925488	GBM	0
0.168371578656345	GBM	0
0.174062270164256	GBM	0
0.160455655004068	GBM	0
0.141321768643349	GBM	0
0.201541850220264	GBM	0
0.194019307746645	GBM	0
0.162409638554217	GBM	0
0.215332129239414	GBM	0
0.16289592760181	GBM	0
0.176838948668195	GBM	0
0.184753014391287	GBM	0
0.169153137340939	GBM	0
0.150449293966624	GBM	0
0.169904216274282	GBM	0
0.181605307662287	GBM	0
0.204645546242364	LUAD	0
0.14812771279335	LUAD	0
0.134280358718024	LUAD	0
0.123307704238772	LUAD	0
0.243454112668606	LUAD	0
0.243496357960458	LUAD	0
0.187623081782038	LUAD	0
0.249391134924501	LUAD	0
0.183232451948604	LUAD	0
0.204494755327733	LUAD	0
0.153401105593554	LUAD	0
0.166147326436495	LUAD	0
0.136139492682157	LUAD	0
0.13454251816883	LUAD	0
0.272241313478427	LUAD	0
0.150787667156065	LUAD	0
0.199093348135813	LUAD	0
0.177293428757319	LUAD	0
0.233742774566474	LUAD	0
0.180915260273431	LUAD	0
0.138005365012455	LUAD	0
0.126815817947018	LUAD	0
0.143702264800671	LUAD	0
0.169060669060669	LUAD	0
0.103292083604713	LUAD	0
0.158099747956924	LUAD	0
0.25614489003881	LUAD	0
0.127462063914144	LUAD	0
0.137703314173902	LUAD	0
0.230982019363762	LUAD	0
0.276168531928901	LUAD	0
0.295972631507638	LUAD	0
0.239787581699346	LUAD	0
0.213775510204082	LUAD	0
0.216323096339924	LUAD	0
0.333212538503352	LUAD	0
0.236217597663381	LUAD	0
0.225054624908958	LUAD	0
0.225763612217795	LUAD	0
0.153395721925134	LUAD	1
0.160753394656154	LUAD	0
0.146479821789359	LUAD	0
0.127445157937716	LUAD	1
0.150462089777442	LUAD	0
0.252411829827613	LUAD	0
0.204728950403691	LUAD	0
0.26541451609449	SKCM	0
0.258718632681288	SKCM	0
0.27135591644867	SKCM	0
0.2428776018131	SKCM	0
0.277277064998409	SKCM	0
0.237099971679411	SKCM	0
0.132480240873165	SKCM	0
0.324777042577675	SKCM	1
0.27478209226362	SKCM	0
0.258629213301024	SKCM	1
0.288408136906684	SKCM	0
0.245717636218955	SKCM	0
0.239089573151977	SKCM	0
0.253353410048488	SKCM	1
0.104394208788418	SKCM	0
0.246865554305542	SKCM	1
0.224254278728606	SKCM	0
0.237258899926559	SKCM	1
0.332461459623351	SKCM	1
0.130767202741893	SKCM	0
0.25018167724432	SKCM	1
0.13742802303263	SKCM	0
0.319393675750786	SKCM	1
0.262907461154218	SKCM	0
0.259184003558359	SKCM	0
0.240710966235711	SKCM	0
0.285506339020191	SKCM	0
0.260350452359331	SKCM	0
0.260161783857613	SKCM	1
0.293153066065973	SKCM	1
0.177241863732147	SKCM	0
0.146067415730337	SKCM	0
0.278637319617683	SKCM	0
0.24137778466031	SKCM	1
0.299135055350554	SKCM	0
0.24190487521937	SKCM	1
0.267038959017914	SKCM	0
0.212949465500486	SKCM	0
0.334554458206561	UCEC	0
0.200725255972696	UCEC	0
0.217870659865065	UCEC	0
0.0955832407681181	UCEC	0
0.205298013245033	UCEC	0
0.211706900234993	UCEC	0
0.270997083395126	UCEC	0
0.192266836626301	UCEC	0
0.251862138618861	UCEC	0
0.252636405318661	UCEC	0
0.293294802529631	UCEC	0
0.206747404844291	UCEC	0
0.284789644012945	UCEC	0
0.150595813204509	UCEC	0
0.414347555567323	UCEC	1
0.199278924942642	UCEC	0
0.183201296362982	UCEC	0
0.21769466927156	UCEC	0
0.196478653786226	UCEC	0
0.260494577006508	UCEC	0
0.233527262887295	UCEC	0
0.218693101355452	UCEC	0
0.239233419465978	UCEC	0
0.225869565217391	UCEC	0
0.113741420366998	UCEC	0
0.0859591842441954	UCEC	0
0.203337453646477	UCEC	0
0.289976907708674	UCEC	0
0.191682419659735	UCEC	0
0.21045045045045	UCEC	0
0.18519838441435	UCEC	0
0.292466465844466	UCEC	0
0.207874971549958	UCEC	0
0.173767402910081	UCEC	0
0.255209407881164	UCEC	0
0.202541575149043	UCEC	0
0.186733238231098	UCEC	0
0.222792937399679	UCEC	0
0.20226956002389	UCEC	0
0.367897985115266	UCEC	0
0.182981255578697	UCEC	0
0.248923004621289	UCEC	0
0.205355459174052	UCEC	0
0.187718584790565	UCEC	0
0.24917943107221	UCEC	0
0.213453433600529	UCEC	0
0.209754394133395	UCEC	0
