# Supplementary material for: Non-coding cancer driver candidates identified with a sample- and position-specific model of the somatic mutation rate
Source: eLife journal article supplement (doi:10.7554/elife.21778), 2017-03-31
Supplement: supp [file elife-21778-supp-v2.zip › elife_poa_e21778_Figure_6_source_data_2.txt]

uracil_DNA_glycosylase_deficiency_signature_statistic	cancer_type	smug1_expression	ung_expression	smug1_x_ung_expression
0.193236714975845	LUAD	381.534200000001	790.993999999999	301791.2629948
0.156739811912226	LUAD	374.757600000001	986.4754	369689.153363041
0.186440677966102	LUAD	566.0284	1439.77449999997	814953.256595784
0.155763239875389	LUAD	809.087300000002	558.535899999998	451904.30328407
0.244897959183673	LUAD	668.2957	809.407499999997	540923.551797748
0.288256227758007	LUAD	1441.94629999996	1403.69129999999	2024047.47637711
0.145945945945946	LUAD	963.755400000001	1583.90550000002	1526497.47871472
0.274368231046931	LUAD	1434.8107	1450.64869999997	2081406.27670105
0.104330708661417	LUAD	1065.95909999999	670.962900000001	715219.009017387
0.202153110047847	LUAD	957.261200000001	1681.94370000001	1610059.44459445
0.187022900763359	LUAD	866.8987	990.430600000001	858602.999580221
0.365714285714286	LUAD	857.711599999999	1161.22810000003	995998.811615985
0.213235294117647	LUAD	665.276600000001	673.894899999998	448326.507829339
0.173423423423423	LUAD	563.899200000002	689.799099999999	388977.160650721
0.180743243243243	LUAD	480.1223	798.165099999999	383216.86359173
0.213197969543147	LUAD	510.222199999998	1328.88889999998	678028.618113567
0.123745819397993	LUAD	674.771999999999	880.634600000002	594227.5703112
0.220640569395018	LUAD	810.635599999999	1441.13000000005	1168231.28222804
0.181528662420382	LUAD	1058.37499999998	1939.78439999998	2053019.31434994
0.269230769230769	LUAD	693.150699999999	1267.8843	878834.890064011
0.165413533834586	LUAD	595.8055	1833.1745	1092215.44955975
0.25	LUAD	340.2742	936.346799999999	318614.65829256
0.168518518518519	LUAD	616.548899999998	954.086800000002	588241.16704452
0.138263665594855	LUAD	686.124399999998	1252.63160000004	859461.104971063
0.190070921985816	LUAD	1071.24309999998	1254.39859999997	1343765.84489961
0.205128205128205	LUAD	473.553700000001	373.553699999999	176897.73678369
0.385964912280702	LUAD	883.3371	1065.79240000001	941453.967818051
0.206185567010309	LUAD	1152.7893	1550.1795	1787030.34067935
0.16025641025641	LUAD	920.146500000001	807.325999999998	742858.193258998
0.169014084507042	LUAD	1059.38910000003	1204.18549999999	1275700.99307807
0.293969849246231	LUAD	1000.218	1084.80489999997	1085041.38746817
0.212121212121212	LUAD	957.463300000001	1074.2459	1028551.02442547
0.301587301587302	LUAD	840.913499999998	914.308000000001	768853.940358
0.19047619047619	PRAD	560.247200000001	516.477900000001	289355.297336881
0.37037037037037	PRAD	886.6055	590.184200000001	523260.557733101
0.111111111111111	PRAD	363.235300000001	872.426499999998	316896.10145545
0.263157894736842	PRAD	644.311099999999	825.038199999998	531581.270184018
0.241379310344828	PRAD	1084.77139999998	821.765999999999	891428.254292383
0.192307692307692	PRAD	551.0565	1012.3952	557886.9555288
0.212121212121212	PRAD	414.639099999999	1142.91559999999	473897.495759955
0.208144796380091	PAAD	808.365199999997	824.049900000001	666133.262223479
0.35	PAAD	424.467099999999	601.019500000002	255113.00420845
0.346153846153846	PAAD	689.909799999998	644.725600000001	444802.50975088
0.213235294117647	PAAD	682.178199999998	608.910899999999	415385.741722378
0.293478260869565	PAAD	988.377800000003	635.200899999998	627818.468100019
0.25974025974026	PAAD	1105.63799999999	733.531200000002	811019.968905597
0.310344827586207	LUAD	414.879799999999	500.649799999998	207709.488894039
0.227777777777778	LUAD	1188.94470000001	2018.59300000006	2399995.44880719
0.166144200626959	LUAD	777.661700000001	1090.74619999997	848231.544160516
0.169047619047619	LUAD	1055.49389999998	2112.09770000002	2229306.23855401
0.208754208754209	LUAD	349.760599999999	1439.31289999997	503414.943491727
0.143312101910828	LUAD	380.521500000001	391.832999999999	149100.8809095
0.3125	LUAD	695.001800000002	734.403499999999	510411.754426301
0.257142857142857	LUAD	2428.57139999993	1079.96210000002	2622765.06914392
0.24390243902439	LUAD	583.736399999999	1224.30470000002	714671.218081087
0.258992805755396	LUAD	1353.20189999997	1999.77840000003	2706103.93045894
0.122691292875989	LUAD	1680.16780000003	2749.00880000005	4618796.06767681
0.172541743970315	LUAD	683.616900000001	1007.0732	688452.259057082
0.285714285714286	LUAD	485.1794	673.946999999999	326985.201091799
0.214876033057851	LUAD	485.1936	672.7411	326409.67617696
0.333333333333333	LUAD	613.584500000001	663.8128	407305.2449816
0.323529411764706	PAAD	1645.85830000005	459.183700000002	755751.303869738
0.275862068965517	PAAD	619.188500000001	612.848700000001	379468.867279951
0.233009708737864	PAAD	807.932	749.575099999999	605605.709693199
0.20253164556962	PAAD	607.880699999999	768.719099999998	467289.504611369
0.363636363636364	PAAD	454.814800000001	520.493799999999	236728.28354824
0.278350515463918	PAAD	582.325000000001	751.911700000001	437856.980702501
0.273809523809524	PAAD	675.621799999998	537.305500000001	363015.3090599
0.25	PAAD	574.263499999999	501.341200000001	287901.9522062
0.296296296296296	PAAD	500.577400000001	491.916899999999	246242.48281806
0.411764705882353	PAAD	551.920300000001	599.508599999998	330880.96636458
0.289473684210526	PAAD	396.596900000001	587.321499999999	232929.88620335
0.410958904109589	PAAD	421.172200000002	682.871399999998	287606.44985508
0.30952380952381	PAAD	691.124800000002	826.449900000001	571180.021847522
0.176470588235294	PAAD	630.911799999998	648.951700000001	409431.28516006
0.356164383561644	PAAD	655.946099999999	777.486900000002	509989.499856091
0.263157894736842	CHOL	910.179600000001	1082.74360000001	985491.136750568
0.188679245283019	CHOL	650.085799999999	1134.93419999999	737804.60735435
0.240740740740741	CHOL	501.762499999999	482.314299999999	242007.228953749
0.337837837837838	CHOL	696.007600000002	1060.0899	737830.627083245
0.23728813559322	CHOL	496.4484	883.895099999998	438808.308162839
0.156521739130435	LUAD	987.957999999999	1006.6037	994482.1782446
0.172172172172172	LUAD	601.003400000002	816.421600000003	490672.157433443
0.170506912442396	LUAD	472.483199999999	598.657700000001	282855.70580064
0.155021834061135	LUAD	529.911699999999	436.4171	231262.52737007
0.35	LUAD	753.121999999998	463.4966	349069.486385199
0.319230769230769	LUAD	601.1312	952.329700000002	572475.095356641
0.296296296296296	LUAD	717.7419	795.540799999999	570992.96531952
0.272727272727273	LUAD	205.6094	1173.18319999996	241217.493842072
0.180778032036613	LUAD	684.544500000001	889.525800000001	608919.993998102
0.278026905829596	LUAD	918.102500000001	877.377499999998	805522.476193748
0.261224489795918	LUAD	533.6188	755.460399999999	403127.87209552
0.1579476861167	LUAD	808.543100000001	774.599499999998	626297.080988449
0.373333333333333	LUAD	622.439	1144.06500000001	712110.674535006
0.140127388535032	LUAD	665.863499999999	951.405600000001	633506.262735599
0.223021582733813	LUAD	786.478900000001	2839.43659999992	2233156.97378768
0.14020618556701	LUAD	1262.1779	1085.9518	1370664.36242522
0.25	LUAD	477.3379	570.2811	272216.78268369
0.106707317073171	LUAD	468.098500000002	895.1358	419011.725276302
0.318181818181818	LUAD	643.5018	530.2347	341206.98387246
0.184834123222749	LUAD	300.5464	620.218599999998	186404.46744304
0.1	LUAD	373.9119	608.544299999999	227541.955447169
0.131832797427653	LUAD	481.412600000001	485.1301	233547.74277926
0.354430379746835	LUAD	398.788500000001	655.224600000002	261296.035397101
0.172248803827751	LUAD	647.270100000001	377.155200000001	244121.284019521
0.225806451612903	LUAD	303.5245	492.8985	149606.77076325
0.174807197943445	LUAD	397.842599999999	1035.53299999997	411979.141105787
0.247619047619048	LUAD	739.589600000001	731.619799999999	541098.39523408
0.205128205128205	LUAD	466.367700000001	621.076199999997	289649.878918739
0.152882205513784	LUAD	1234.36020000003	1742.40349999999	2150753.53274073
0.210169491525424	LUAD	466.583399999999	950.968100000001	443705.929389539
0.169779286926995	LUAD	484.794700000001	689.0122	334029.462795341
0.145922746781116	LUAD	990.823399999999	3272.44730000004	3242417.36010686
0.163355408388521	LUAD	686.054300000002	2004.49290000002	1375190.97336449
0.177493138151876	LUAD	1981.91510000007	1190.50930000002	2359488.35836056
0.188034188034188	LUAD	381.8826	472.942099999999	180608.35879746
0.148809523809524	LUAD	689.964900000002	716.517000000002	494371.580253303
0.139896373056995	LUAD	598.352399999999	622.633300000002	372554.12937492
0.154798761609907	LUAD	809.627100000002	1160.78119999998	939799.916690509
0.157723577235772	LUAD	430.6067	506.86	218257.311962
0.164429530201342	LUAD	918.274699999999	775.2554	711897.419858379
0.257918552036199	LUAD	755.373599999999	579.8362	437992.95780432
0.224489795918367	LUAD	893.864799999997	915.8083	818608.802917838
0.256410256410256	LUAD	497.698500000001	460.874600000001	229376.597108101
0.1875	LUAD	1313.1642	755.997099999997	992748.327023814
0.256410256410256	LUAD	500.997799999999	557.342400000001	279227.31624672
0.37410071942446	LUAD	1246.83819999997	813.603499999997	1014431.92345367
0.168704156479218	LUAD	521.4827	1235.88880000001	644494.628323764
0.140575079872204	LUAD	671.436400000001	749.954100000002	503546.481069242
0.367647058823529	LUAD	819.058300000002	569.128500000002	466149.421691553
0.174129353233831	LUAD	1414.6376	1277.48989999999	1807185.24616023
0.283783783783784	LUAD	763.276099999997	676.618199999997	516446.500885016
0.16289592760181	LUAD	1127.42070000001	893.067600000001	1006862.89873933
0.167883211678832	LUAD	1229.33039999999	566.709799999999	696673.585117912
0.184331797235023	LUAD	4671.39399999996	1216.88000000003	5684525.9307201
0.148148148148148	LUAD	2647.82890000009	336.8455	891909.249734979
0.229166666666667	LUAD	651.806299999999	789.392799999999	514531.200214638
0.260115606936416	LUAD	1791.87950000003	1898.99450000001	3402769.31516284
0.336569579288026	LUAD	1166.29379999998	1231.17079999997	1435906.87078097
0.272727272727273	LUAD	614.758500000003	669.560499999999	411618.008639251
0.14336917562724	LUAD	623.727100000002	663.951100000002	414124.294144812
0.433333333333333	LUAD	410.319399999999	773.464400000001	317367.44852936
0.318918918918919	LUAD	457.561900000001	775.068699999998	354641.90700253
0.154308617234469	LUAD	1133.13609999996	1497.04139999998	1696351.65353446
0.127659574468085	CHOL	438.144300000001	451.0309	197616.61795887
0.255813953488372	CHOL	892.6022	977.669800000001	872670.214353562
0.409090909090909	LUAD	647.901699999999	704.1965	456250.109484049
0.141566265060241	LUAD	806.260599999998	703.891700000001	567520.14437702
0.122651933701657	LUAD	472.6562	778.459800000002	367943.850920761
0.174603174603175	LUAD	873.741300000003	891.556900000001	778990.084829974
0.272727272727273	LUAD	745.847199999998	634.551500000001	473278.459530799
0.166666666666667	LUAD	752.6132	898.954700000002	676565.173422042
0.184466019417476	LUAD	961.104799999998	572.900499999999	550617.420472398
0.233532934131737	LUAD	1030.485	2156.12009999993	2221849.42124842
0.127564674397859	LUAD	634.808899999999	956.197499999998	607002.683157748
0.169871794871795	LUAD	893.939400000001	2900.88380000008	2593214.3236418
0.223684210526316	LUAD	500.831299999998	570.656700000002	285802.73691471
0.199255121042831	LUAD	443.418200000001	1006.7482	446410.47469724
0.425	LUAD	578.067799999999	674.836899999999	390101.482141819
0.287769784172662	LUAD	311.4035	1260.2339	392441.24727865
0.305263157894737	LUAD	479.562199999999	1086.3691	520981.555608018
0.176178660049628	LUAD	455.128199999999	718.589700000001	327050.43669954
0.186666666666667	LUAD	367.6036	451.992599999999	166154.10693336
0.305555555555556	LUAD	437.2618	776.947700000003	339729.549807861
0.197568389057751	LUAD	1037.31099999998	892.570000000003	925872.679269988
0.189024390243902	LUAD	553.804300000001	1710.86959999998	947486.94121927
0.317460317460317	LUAD	317.8017	950.418199999998	302044.51967094
0.22742474916388	LUAD	942.771199999997	1821.74900000001	1717492.49082881
0.192771084337349	LUAD	484.9262	614.496500000001	297985.452658301
0.171539961013645	LUAD	1144.36620000002	1590.14080000003	1819703.38476103
0.392523364485981	LUAD	722.8296	909.9678	657751.66088688
0.328125	LUAD	755.890699999998	695.570200000001	525775.045377139
0.207547169811321	LUAD	681.996600000002	802.019100000002	546974.299335063
0.160642570281124	LUAD	775.556799999997	983.022899999996	762390.094650714
0.215686274509804	LUAD	378.606299999999	675.987599999998	255933.164081879
0.144444444444444	LUAD	516.976599999999	458.229199999999	236893.773836719
0.32	LUAD	639.405200000001	801.734800000001	512633.400140962
0.198823529411765	LUAD	1244.62009999998	1138.33990000001	1416800.72017197
0.143617021276596	LUAD	524.120700000002	687.7306	360453.843483421
0.178082191780822	LUAD	1120.24670000001	1391.57250000003	1558904.5009358
0.169291338582677	LUAD	991.0495	2726.86139999993	2702454.62703923
0.235905044510386	LUAD	472.282799999999	621.139899999999	293353.691163719
0.27007299270073	LUAD	1025.94339999997	1854.95279999995	1903076.58247141
0.156804733727811	LUAD	1356.30880000003	1765.2768	2394260.45827589
0.172566371681416	LUAD	1219.6566	1838.95800000005	2242897.26182285
0.234375	LUAD	664.0949	879.554200000001	584107.458493581
0.0434782608695652	LUAD	411.928699999999	556.298799999999	229155.441495559
0.150375939849624	LUAD	509.1743	920.707700000001	468800.698652111
0.321637426900585	LUAD	328.9267	909.701999999997	299225.276843399
0.322147651006711	LUAD	493.417299999998	1899.8283	937408.150249587
0.163021868787276	LUAD	614.009600000001	1090.03950000002	669294.71737921
0.241176470588235	LUAD	367.8124	773.851599999998	284632.21423984
0.289156626506024	LUAD	469.506300000001	995.159700000001	467233.748656111
0.403333333333333	LUAD	804.794499999999	706.620999999999	568684.694384499
0.185185185185185	LUAD	692.372200000002	1040.23470000001	720229.587755347
0.256410256410256	LUAD	403.846099999999	1145.97180000002	462796.242139988
0.149068322981366	LUAD	401.674299999999	730.0607	293246.620630009
0.315789473684211	LUAD	401.414700000001	351.016800000001	140903.30346696
0.25	LUAD	631.578900000002	797.368399999999	503601.056966761
0.430232558139535	LUAD	498.732399999999	542.060400000001	270343.08423696
0.221238938053097	LUAD	433.687900000001	805.673800000002	349410.978407021
0.533333333333333	LUAD	318.0987	402.1938	127937.32492806
0.141666666666667	LUAD	536.567199999998	911.940299999997	489317.253338157
0.55	LUAD	495.639499999999	465.843	230890.191598499
0.25	LUAD	535.310700000001	853.8136	457055.555885521
0.178571428571429	LUAD	320.6634	474.775400000001	152243.094000361
0.202959830866808	LUAD	780.626799999998	674.074099999999	526200.307645878
0.265560165975104	LUAD	368.9223	821.553900000002	303089.55436197
0.245614035087719	LUAD	750.1761	638.9119	479296.43738559
0.211640211640212	LUAD	787.799600000001	1560.34859999999	1229242.00294055
0.296296296296296	LUAD	487.590099999999	446.7574	217834.485341739
0.276094276094276	LUAD	419.924599999999	623.9333	262004.941429179
0.18407960199005	LUAD	615.611699999998	1032.29210000002	635491.09457758
0.214007782101167	LUAD	482.9659	1179.35869999999	569590.035968327
0.172413793103448	LUAD	472.689099999999	641.806700000001	303375.03139697
0.216666666666667	LUAD	623.779899999998	1397.51549999999	871742.078838444
0.325	LUAD	272.477100000001	633.945	172735.495159501
0.163265306122449	LUAD	1466.19740000003	422.3004	619175.748498973
0.174825174825175	LUAD	463.9279	741.483000000002	343994.651075701
0.2	LUAD	473.118300000001	738.494600000001	349395.309711181
0.265432098765432	LUAD	570.503200000001	1122.07270000003	640146.06598266
0.184300341296928	LUAD	580.140700000001	834.245499999999	483979.76834185
0.154605263157895	LUAD	1252.77779999997	1598.14810000003	2002124.46079217
0.152263374485597	LUAD	359.4555	725.254400000001	260696.6829792
0.204481792717087	LUAD	1058.61250000003	1601.26260000004	1695116.6041426
0.142857142857143	LUAD	283.858100000001	653.673200000002	185550.432572921
0.167415009621552	LUAD	361.2534	877.3298	316938.37317132
0.190119760479042	LUAD	706.980700000002	1295.70689999996	916039.771156802
0.334545454545455	LUAD	833.681299999998	980.514999999996	817437.019869495
0.369565217391304	LUAD	553.2286	661.780099999998	366115.678230859
0.238567073170732	LUAD	438.696800000001	849.533199999999	372687.49633376
0.177083333333333	LUAD	556.828699999999	530.1951	295227.84827937
0.222222222222222	LUAD	412.266699999999	723.623699999998	298325.954840789
0.269491525423729	LUAD	946.666599999999	601.008699999999	568954.862599418
0.154989384288747	LUAD	800.4768	601.9967	481884.392026561
0.170068027210884	LUAD	1061.8476	533.574499999999	566574.802246199
0.214285714285714	LUAD	597.685300000001	592.481100000002	354117.243997831
0.127358490566038	LUAD	729.552099999999	1109.69569999998	809580.828295951
0.274678111587983	LUAD	406.115900000001	896.9957	364284.216001631
0.216757741347905	LUAD	511.4029	1112.04820000002	568704.674419791
0.277777777777778	LUAD	407.265200000001	523.626699999999	213254.93270084
0.16566265060241	LUAD	369.415199999998	601.162400000002	222078.52822848
0.336734693877551	LUAD	556.988099999999	838.060899999999	466789.948375289
0.207207207207207	LUAD	459.532699999999	475.160199999999	218351.649638539
0.170940170940171	LUAD	630.967700000001	648.602200000001	409247.038348941
0.17296511627907	LUAD	718.261099999998	1033.91939999998	742624.085555325
0.225	LUAD	992.928700000001	962.875700000001	956066.917062591
0.164133738601824	LUAD	736.486499999999	681.306300000002	501772.892314951
0.162473794549266	LUAD	969.1558	1021.1039	989608.767087618
0.189944134078212	LUAD	1004.4209	462.422600000001	464466.924072342
0.159509202453988	LUAD	596.083200000001	576.499399999998	343641.607150079
0.208053691275168	LUAD	305.6875	487.0368	148881.0618
0.263157894736842	LUAD	376.803800000001	540.887200000001	203808.352331361
0.5	LUAD	469.584599999999	461.424300000001	216677.74534578
0.169064748201439	LUAD	452.9032	307.741899999999	139377.29128408
0.192139737991266	LUAD	488.448799999999	1284.92850000001	627621.783910801
0.196581196581197	LUAD	1119.25129999998	761.497300000002	852306.84297148
0.152892561983471	LUAD	481.6176	563.025199999999	271162.84556352
0.105263157894737	LUAD	339.545699999999	418.171199999999	141988.232823839
0.174273858921162	LUAD	768.566799999998	1436.52330000002	1104064.11580645
0.177966101694915	LUAD	530.8692	542.1187	287794.12057404
0.190243902439024	LUAD	403.714600000001	514.173999999999	207579.5507404
0.419178082191781	LUAD	812.5	1396.00840000004	1134256.82500003
0.274509803921569	LUAD	690.5334	649.6877	448631.05641918
0.150341685649203	LUAD	1072.58920000001	885.132100000002	949383.131033334
0.176781002638522	LUAD	851.7734	1436.73900000001	1223776.06294261
0.205479452054795	LUAD	1281.73540000004	535.618599999999	686521.320518458
0.265957446808511	LUAD	804.707999999999	1646.74289999998	1325147.18557318
0.110169491525424	LUAD	974.714200000003	874.493400000003	852381.134786286
0.361490683229814	LUAD	563.106799999999	1366.62039999997	769553.240258702
0.131771595900439	LUAD	389.240500000001	418.248899999999	162799.41096045
0.25	LUAD	800.083199999998	894.895500000001	715990.855305599
0.256756756756757	LUAD	667.5731	778.981499999999	520027.094797649
0.235294117647059	LUAD	659.853999999998	440.8759	290913.726118599
0.271739130434783	LUAD	782.556300000002	1037.40319999997	811826.409800137
0.22735674676525	LUAD	381.240499999999	1078.29049999999	411088.009365247
0.306451612903226	LUAD	1095.70140000002	1009.4839	1106092.92250749
0.197072072072072	LUAD	1103.67889999996	1073.57859999999	1184886.04831149
0.114982578397213	LUAD	1109.0226	560.902299999998	622053.327091977
0.258823529411765	LUAD	469.2035	410.678100000001	192691.601893351
0.245901639344262	LUAD	660.485699999998	348.344400000001	230076.49487508
0.285714285714286	LUAD	482.531899999999	681.874200000001	329026.05328698
0.296296296296296	LUAD	785.111699999999	998.511199999999	783942.825701038
0.142857142857143	LUAD	411.0276	484.2105	199023.8797098
0.173076923076923	LUAD	1145.32020000001	649.014799999999	743329.760538965
0.376146788990826	LUAD	1601.02300000002	1399.99999999997	2241432.19999999
0.254545454545455	LUAD	419.884200000001	891.8919	374491.31691798
0.156346749226006	LUAD	1705.83079999999	781.5504	1333192.74407231
0.273469387755102	LUAD	1154.26699999997	1857.76810000001	2144360.41148266
0.246478873239437	LUAD	1600.56189999999	1135.09720000001	1816793.33111668
0.147572815533981	LUAD	542.658199999998	745.792199999997	404710.252826037
0.294117647058824	LUAD	730.941700000001	913.303400000001	667571.539811782
0.32183908045977	LUAD	687.449200000001	683.473399999997	469853.242051279
0.145833333333333	LUAD	1077.21099999998	988.769300000001	1065113.16642228
0.148936170212766	LUAD	423.267699999998	904.549000000002	382866.374767299
0.168421052631579	LUAD	599.898500000001	599.379599999999	359566.9229706
0.147945205479452	LUAD	1062.19310000002	1090.01640000002	1157807.89896688
0.190766550522648	LUAD	936.977500000001	577.491999999999	541097.01043
0.225988700564972	LUAD	391.201900000001	650.4321	254450.27334099
0.180722891566265	LUAD	1119.36089999999	712.405999999999	797439.421325389
0.260093167701863	LUAD	738.110699999998	619.544000000001	457292.0555208
0.246153846153846	LUAD	893.726600000001	628.277199999999	561508.04581352
0.191919191919192	LUAD	632.065799999998	526.207599999998	332597.827660078
0.275862068965517	LUAD	728.0856	434.296699999999	316205.173397519
0.179577464788732	LUAD	311.576499999999	556.5916	173420.8626574
0.203125	LUAD	385.831499999999	595.133900000002	229621.40533785
0.428571428571429	LUAD	416.0896	879.917499999999	366124.520608
0.217391304347826	LUAD	243.915599999999	427.563000000001	104289.2856828
0.285714285714286	LUAD	1271.08059999996	1094.94069999997	1391757.88192034
0.1875	LUAD	608.742600000002	730.707000000001	444812.479018202
0.226666666666667	LUAD	344.6136	603.517100000001	207980.20049256
0.292929292929293	LUAD	566.976099999999	767.9045	435383.498582449
0.210834553440703	LUAD	397.003699999999	519.350799999999	206184.189197959
0.162055335968379	LUAD	595.2339	1403.32769999996	835308.219849006
0.168278529980658	LUAD	347.4059	727.142300000002	252613.52515957
0.199115044247788	LUAD	405.1782	1085.07059999999	439646.952580915
0.150891632373114	LUAD	605.3929	979.414299999998	592930.463378469
0.183233532934132	LUAD	1177.98360000004	1278.42000000002	1505957.79391207
0.174193548387097	LUAD	436.2814	466.566800000001	203554.41669752
0.1875	LUAD	442.6946	460.1661	203713.04757306
0.211805555555556	LUAD	1037.72540000001	1387.51729999998	1439861.94514941
0.164356435643564	LUAD	954.489499999999	883.1488	842956.256537599
0.328125	LUAD	545.7328	401.577000000001	219153.740625601
0.235955056179775	LUAD	497.851699999999	578.450399999998	287982.515005679
0.168269230769231	LUAD	648.312200000001	1007.173	652962.543410601
0.165289256198347	LUAD	490.183400000001	756.490699999999	370819.18339438
0.156565656565657	LUAD	647.928100000001	1718.41789999997	1113411.24495297
0.149228130360206	LUAD	418.942199999999	844.526400000002	353807.74797408
0.179190751445087	LUAD	2043.46039999995	610.6328	1247803.94574109
0.271428571428571	LUAD	854.399000000002	975.526599999998	833488.9515134
0.181818181818182	LUAD	572.031700000002	1094.98679999997	626367.160681547
0.215384615384615	LUAD	403.0358	426.165500000001	171759.9532249
0.192	LUAD	589.806500000001	456.527699999999	269263.00489005
0.303370786516854	LUAD	1187.82449999997	1220.05370000004	1449209.67617566
0.208333333333333	LUAD	463.719100000001	604.188699999999	280173.84019417
0.198830409356725	LUAD	771.649500000001	1731.4433	1336067.35672335
0.212518195050946	LUAD	696.656100000001	1507.96180000001	1050530.78653699
0.123762376237624	LUAD	803.685300000002	1116.22960000002	897097.320944901
0.217391304347826	LUAD	882.0407	1566.79449999996	1381976.51753611
0.230769230769231	LUAD	341.1279	417.4691	142410.35739789
0.204081632653061	LUAD	290.677999999999	948.305100000001	275651.429857799
0.21978021978022	LUAD	365.0094	555.066099999999	202604.344121339
0.283950617283951	LUAD	671.648400000002	1144.1758	768483.845388721
0.178571428571429	LUAD	994.740300000003	1213.01779999996	1206637.6902773
0.521739130434783	LUAD	426.3578	851.156699999999	362897.298067259
0.244473342002601	LUAD	443.094699999999	1203.85699999999	533422.656257894
0.314285714285714	LUAD	479.954599999999	582.450800000001	279549.94073368
0.159663865546218	LUAD	738.8535	925.593499999998	683877.997052249
0.125	LUAD	413.541699999999	599.999999999999	248125.019999999
0.208888888888889	LUAD	1227.95700000001	680.6452	835803.037856405
0.155440414507772	LUAD	487.066800000001	991.5913	482971.201398841
0.224324324324324	LUAD	587.064700000002	1821.39300000006	1069275.53512714
0.25414364640884	LUAD	819.274499999998	1424.53600000001	1167086.01913201
0.151111111111111	LUAD	589.205000000001	1035.36289999999	610040.997494494
0.352272727272727	LUAD	729.528500000002	642.404199999999	468652.1724197
0.298823529411765	LUAD	1092.94319999999	1126.2192	1230893.61634943
0.324074074074074	LUAD	341.689899999999	794.800399999999	271575.269195959
0.235772357723577	LUAD	687.137500000002	1185.75739999996	814778.375442476
0.32183908045977	LUAD	572.108899999998	1302.57479999999	745214.635995712
0.145392491467577	LUAD	315.393500000001	1632.52310000005	514887.174339867
0.305177111716621	LUAD	506.218899999999	546.019900000001	276405.59315611
0.193415637860082	LUAD	292.531099999999	851.4523	249076.277916529
0.140983606557377	LUAD	781.818199999998	1073.82919999999	839539.212251428
0.239130434782609	LUAD	287.0662	858.044199999998	246315.48792604
0.1875	LUAD	1010.7941	573.554900000001	579745.908946089
0.288659793814433	LUAD	633.369900000002	668.130299999999	423173.621297971
0.181818181818182	LUAD	532.397500000002	432.423199999999	230221.030622
0.164444444444444	LUAD	1370.04009999995	786.446700000003	1077463.51551264
0.225	LUAD	932.243700000001	366.716200000001	341868.867137941
0.211722488038278	LUAD	1185.94780000002	887.4019	1052412.33102084
0.158469945355191	LUAD	1024.21680000002	586.028299999998	600220.03013545
0.175409836065574	LUAD	1229.6204	1529.79620000005	1881068.61536254
0.211678832116788	LUAD	416.547799999998	552.425099999999	230111.460069779
0.282982791586998	LUAD	911.634800000001	658.9102	600685.468394961
0.416666666666667	LUAD	1096.2717	447.3902	490461.215117339
0.194225721784777	LUAD	287.805900000001	733.179899999999	211013.50098141
0.159574468085106	LUAD	680.039000000002	682.630199999999	464215.158577801
0.193681318681319	LUAD	633.697999999998	1453.53759999996	921103.87004477
0.176470588235294	LUAD	447.67	990.832699999996	443566.074808998
0.179245283018868	LUAD	761.874599999999	883.470599999998	673093.809986758
0.21484375	LUAD	775.808799999999	1012.0513	785158.304591441
0.166524338172502	LUAD	662.475199999999	482.461900000001	319619.04369488
0.437956204379562	LUAD	397.8845	761.594800000002	303026.766200601
0.121951219512195	LUAD	1117.12430000004	794.044800000001	887046.74136867
0.251141552511416	LUAD	542.9208	833.890699999997	452736.605956558
0.221311475409836	LUAD	543.3721	1325.57269999997	720279.221701654
0.25	LUAD	799.142399999997	476.484000000001	380778.567321599
0.144340602284528	LUAD	493.8764	735.403000000001	363198.1861892
0.154545454545455	LUAD	754.478399999998	662.803000000002	500070.5469552
0.195020746887967	LUAD	541.7893	1211.88930000001	656588.655524494
0.198675496688742	LUAD	659.171499999998	1374.13580000002	905791.156489714
0.252873563218391	LUAD	381.578899999998	624.060200000001	238128.20464978
0.222222222222222	LUAD	575.817999999998	1756.99830000002	1011711.24710941
0.225409836065574	LUAD	927.491899999998	1018.7425	944875.416935747
0.201892744479495	LUAD	784.095200000002	883.199	692512.096544802
0.178082191780822	LUAD	549.4963	1345.43339999999	739310.675196417
0.266666666666667	LUAD	553.793399999998	687.526799999999	380747.804163118
0.313291139240506	LUAD	613.199399999999	558.461800000001	342448.44068292
0.155515370705244	LUAD	495.617799999999	709.4002	351591.366443559
0.28169014084507	LUAD	494.281600000001	922.802	456124.049043201
0.333333333333333	LUAD	560.776999999999	768.461600000001	430935.5906632
0.272727272727273	LUAD	499.317899999999	635.7435	317438.10935865
0.419354838709677	LUAD	499.3842	464.6399	232033.82474958
0.128301886792453	LUAD	431.407400000001	686.2222	296041.335124281
0.338983050847458	LUAD	415.1218	667.757200000002	277200.570826961
0.190812720848057	LUAD	655.9889	580.083599999999	380528.40267204
0.152713891444342	LUAD	559.667800000002	2278.45789999994	1275179.52028559
0.18125	LUAD	1396.71929999998	769.1373	1074268.91125987
0.176156583629893	LUAD	775.279300000002	1133.69429999996	878929.723317962
0.2	LUAD	279.0179	563.244000000001	157155.1580676
0.185714285714286	LUAD	1124.13359999999	848.141100000003	953423.908050953
0.258620689655172	LUAD	461.771599999999	588.510799999999	271757.573733279
0.212218649517685	LUAD	737.352699999998	719.334700000001	530403.38324869
0.207509881422925	LUAD	944.282899999999	1088.56459999998	1027912.93732532
0.19205298013245	LUAD	988.195599999999	917.369300000002	906540.305835081
0.205063291139241	LUAD	491.497900000001	516.3389	253779.48503831
0.128630705394191	LUAD	1086.08660000001	2343.41549999999	2545152.17278231
0.265625	LUAD	340.618199999999	1078.99330000002	367524.755658067
0.368421052631579	LUAD	549.8102	621.442100000001	341675.205289421
0.5	LUAD	367.3655	392.433899999999	144166.67589045
0.152173913043478	LUAD	567.340099999999	754.208799999999	427892.896012878
0.178353658536585	LUAD	371.708800000001	1112.54519999999	413542.841237758
0.389240506329114	LUAD	693.486599999998	1039.08049999997	720588.403071279
0.204081632653061	LUAD	729.307399999998	2162.45419999998	1577093.85022106
0.231481481481481	LUAD	511.512400000001	774.7178	396277.761200721
0.183333333333333	LUAD	897.221000000001	2022.05559999995	1814230.74748756
0.267857142857143	LUAD	579.933800000001	1371.51680000003	795388.949587858
0.218390804597701	LUAD	434.886899999999	1593.21449999995	692868.114940025
0.196567862714509	LUAD	534.308200000001	1030.93000000001	550834.352626005
0.172413793103448	LUAD	518.3537	410.456100000001	212761.43812257
0.259414225941423	LUAD	719.999999999998	613.714299999998	441874.295999997
0.368421052631579	LUAD	673.735700000001	667.5405	449745.866045851
0.274509803921569	LUAD	590.435199999998	682.442499999999	402938.073975998
0.257627118644068	LUAD	944.616699999998	2990.40019999995	2824781.96860329
0.140495867768595	LUAD	681.462100000002	1512.40209999995	1030644.71111038
0.388888888888889	LUAD	652.2482	568.9639	371105.67963998
0.241666666666667	LUAD	404.0404	636.363600000003	257116.603489441
0.232142857142857	LUAD	812.353000000001	457.031099999999	371270.5851783
0.394316163410302	LUAD	957.345300000002	1397.70700000003	1338088.22722713
0.313253012048193	LUAD	398.171199999999	1175.81049999996	468173.877757583
0.269230769230769	LUAD	418.41	595.188299999998	249032.736602999
0.309859154929577	LUAD	419.3243	606.9272	254499.32329096
0.256756756756757	LUAD	709.2415	930.688800000003	660083.120545202
0.15859375	LUAD	555.714300000002	633.571399999999	352084.687051021
0.155855855855856	LUAD	689.7903	939.0555	647751.375061649
0.132075471698113	LUAD	429.084400000001	1451.52599999995	622827.162794381
0.155005382131324	LUAD	776.652600000003	814.0647	632245.465823222
0.36996336996337	LUAD	568.082	1089.67789999998	619026.400787789
0.302702702702703	LUAD	593.4627	548.8461	325719.68839047
0.393939393939394	LUAD	624.013199999999	633.881599999998	395550.485637118
0.247706422018349	LUAD	595.761100000002	583.044299999999	347355.11351673
0.373831775700935	LUAD	750.159300000002	963.671100000003	722906.837806234
0.158102766798419	LUAD	648.120999999998	856.515400000001	555125.617563399
0.172268907563025	LUAD	239.9259	755.905500000002	181361.307402451
0.158333333333333	LUAD	1172.06129999997	542.523899999999	635871.267515052
0.16140350877193	LUAD	294.8852	535.4906	157908.25267912
0.22279792746114	LUAD	214.0278	423.2411	90585.3615025798
0.179487179487179	LUAD	401.324400000001	554.320599999998	222462.38220264
0.283018867924528	LUAD	321.009000000001	623.2665	200074.1558985
0.189130434782609	LUAD	419.709899999999	631.315699999998	264969.449315428
0.144067796610169	LUAD	475.692999999999	807.954999999998	384338.537814998
0.149397590361446	LUAD	436.858000000001	700.906300000002	306196.524405402
0.266666666666667	LUAD	566.057699999999	522.067000000001	295520.0452659
0.264150943396226	LUAD	895.099000000001	1296.16630000002	1160197.15896372
0.181132075471698	LUAD	618.682200000002	566.2874	350351.934464281
0.15028901734104	LUAD	375.881199999999	551.912899999998	207453.683147479
0.3	LUAD	724.521699999999	638.9565	462937.849606049
0.280254777070064	LUAD	931.767499999997	1283.1872	1195632.12937599
0.291666666666667	LUAD	614.6978	826.236300000002	507885.635890141
0.135294117647059	LUAD	386.884	542.491299999998	209881.204109199
0.348484848484849	LUAD	667.976599999998	615.120600000001	410886.166977959
0.307692307692308	LUAD	588.414600000001	324.390200000001	190875.929776921
0.143617021276596	LUAD	387.121200000002	557.8064	215938.682935681
0.202099737532808	LUAD	994.0693	520.073000000002	516988.603058902
0.229166666666667	LUAD	464.512999999998	440.5286	204631.261571799
0.193548387096774	LUAD	529.798799999999	521.611000000002	276348.8818668
0.165853658536585	LUAD	760.242799999998	914.011100000001	694870.357895079
0.430379746835443	LUAD	551.088799999998	580.401999999999	319853.041697598
0.342105263157895	LUAD	923.815000000002	383.780700000001	354542.367370502
0.157556270096463	LUAD	588.740900000001	804.039500000002	473370.938865552
0.181069958847737	LUAD	239.013499999999	423.4048	101199.4631648
0.267961165048544	LUAD	588.137299999999	716.094599999999	421161.944588579
0.128801431127013	LUAD	722.649800000001	470.712899999999	340160.58304242
0.144796380090498	LUAD	889.019299999998	831.5244	739241.240020918
0.251256281407035	LUAD	725.000000000001	1339.84380000002	971386.755000015
0.222222222222222	BRCA	642.1305	1312.71190000003	842932.348702967
0.210526315789474	BRCA	560.427799999998	698.971599999998	391723.116050478
0.365079365079365	BRCA	582.539199999999	864.599400000001	503663.04279648
0.222222222222222	BRCA	299.588499999999	965.340600000004	289204.942343101
0.219047619047619	BRCA	519.697400000001	3923.73150000008	2039153.05884814
0.105263157894737	BRCA	509.469699999999	771.149	392877.049685299
0.242937853107345	BRCA	521.511700000001	3441.86900000003	1794974.95336732
0.419354838709677	BRCA	472.455300000001	2480.48160000008	1171916.67847252
0.1	BRCA	553.090300000001	1047.93979999997	579605.338363924
0.188679245283019	BRCA	609.439800000001	932.053899999997	568030.742405219
0.333333333333333	BRCA	642.113399999998	1311.60820000001	842201.200769886
0.180722891566265	BRCA	516.888500000001	1064.20360000001	550074.602498606
0.216216216216216	BRCA	801.662599999999	1973.24330000002	1581875.3543106
0.296296296296296	BRCA	622.122600000003	1074.76059999999	668632.858849555
0.321428571428571	BRCA	862.353100000002	688.369599999999	593617.65850576
0.545454545454545	BRCA	969.270999999996	1357.12350000004	1315420.45196853
0.170731707317073	BRCA	768.484400000002	1217.79860000003	935859.226441867
0.333333333333333	BRCA	412.898399999999	1375.83399999998	568079.657265589
0.240740740740741	BRCA	386.292799999999	1157.49390000003	447131.559613931
0.26	BRCA	522.117999999999	888.739900000001	464027.0991082
0.166666666666667	BRCA	950.781600000003	843.233600000003	801730.991381765
0.238095238095238	BRCA	748.500199999998	1332.25659999996	997194.33155129
0.295774647887324	BRCA	1107.02340000002	1690.63549999995	1871573.05937068
0.25	BRCA	581.519700000002	877.434100000003	510245.214601773
0.111111111111111	BRCA	475.349000000001	745.5443	354393.737460701
0.271186440677966	BRCA	1123.14990000004	2574.50779999994	2891558.17811925
0.5	BRCA	939.562100000002	2227.42410000006	2092803.26498667
0.214285714285714	BRCA	391.4286	592.857099999998	232061.22465306
0.230769230769231	BRCA	474.8764	4334.84349999987	2058514.87584334
0.314814814814815	BRCA	395.0559	738.316699999999	291676.368403529
0.231884057971014	BRCA	286.8231	1846.23910000006	529544.022003226
0.1875	BRCA	280.186999999999	1253.58699999998	351238.780768992
0.333333333333333	BRCA	871.4266	1788.914	1558907.2447124
0.318181818181818	BRCA	492.897699999999	1107.95449999999	546108.224754644
0.3	BRCA	484.466200000001	552.496199999998	267665.73452844
0.277777777777778	BRCA	521.879500000001	802.367299999999	418739.045340351
0.295081967213115	BRCA	467.979299999999	1360.82899999999	636839.802839695
0.24	BRCA	308.891000000001	1397.99549999999	431828.2279905
0	BRCA	407.913100000002	763.815400000002	311570.307641742
0.153846153846154	BRCA	380.010799999999	1586.67390000005	602953.218078137
0.1	BRCA	425.145200000001	1850.37470000002	786677.92190645
0.35	BRCA	582.807000000001	858.9474	500600.557351801
0.2	BRCA	404.18	655.331199999999	264871.764416
0.304347826086957	BRCA	582.311700000001	832.7496	484919.835250321
0.45985401459854	BRCA	728.503499999999	726.674	529384.552358999
0.4	BRCA	398.246200000001	893.594300000001	355870.534316661
0.363636363636364	BRCA	667.240600000001	1106.32800000003	738186.958516821
0.303030303030303	BRCA	534.2058	1634.40520000001	873108.737390166
0.305555555555556	BRCA	791.024500000001	1115.6824	882532.112618803
0.212121212121212	BRCA	320.8092	1362.23509999998	437017.552642913
0.369369369369369	BRCA	387.804900000001	873.867599999998	338890.13723124
0.196850393700787	BRCA	453.136599999999	1055.02510000002	478070.486728669
0.2	BRCA	444.949699999999	1462.56600000005	650768.302930221
0.161290322580645	BRCA	316.9862	949.621000000001	301016.7522302
0.256410256410256	BRCA	406.906799999999	1146.3396	466453.378349278
0.25	BRCA	475.3538	1360.17569999999	646564.687662655
0.238095238095238	BRCA	577.003700000001	1738.30580000005	1003008.87833149
0.296296296296296	BRCA	294.739999999999	718.5611	211788.698614
0.315789473684211	BRCA	481.548299999999	1266.41150000003	609838.304925464
0.0666666666666667	BRCA	505.41	983.485200000001	497063.254932001
0.5	BRCA	571.382600000001	916.015800000001	523395.489445082
0.111111111111111	BRCA	673.219999999998	1070.13819999999	720438.439003989
0.4	BRCA	722.231299999998	1456.93189999998	1052241.82014845
0.516129032258065	BRCA	883.015499999999	1259.42350000004	1112090.47156428
0	BRCA	381.3357	973.166399999998	371103.090360479
0.2	BRCA	546.786	1257.52640000002	687597.830150411
0.555555555555556	BRCA	406.726500000001	856.076199999997	348188.876559299
0.4	BRCA	410.9874	1027.62870000003	422342.447578394
0.245283018867925	BRCA	508.008899999999	1758.15240000002	893157.066756367
0.319148936170213	BRCA	743.038199999999	1397.34340000003	1038279.5247179
0.16504854368932	KIRC	412.4326	722.559900000001	298007.25821274
0.272727272727273	KIRC	486.910100000002	1262.63129999998	614787.932546125
0.282352941176471	KIRC	428.351300000001	1156.39449999996	495343.087387834
0.332129963898917	KIRC	268.027200000001	731.972800000001	196188.620060161
0.256756756756757	KIRC	443.215300000001	608.407100000001	269655.335348631
0.315789473684211	KIRC	1117.45569999998	1563.42609999995	1747059.40697367
0.222748815165877	KIRC	289.8346	867.0265	251294.2788169
0.365217391304348	KIRC	256.684500000001	766.250699999999	196684.67780415
0.25531914893617	KIRC	419.2771	781.204800000003	327541.283050081
0.226415094339623	KIRC	358.645899999999	841.719999999997	301879.426947998
0.207407407407407	KIRC	384.066299999999	793.370199999999	304706.757244259
0.507042253521127	KIRC	579.767600000003	986.089100000002	571702.510893164
0.254901960784314	KIRC	425.425399999998	605.9393	257781.969078219
0.365909090909091	KIRC	369.272200000001	1335.24260000002	493067.972435727
0.341708542713568	KIRC	292.2685	702.208999999998	205233.5711165
0.207317073170732	KIRC	337.3457	813.6165	274470.02772405
0.186046511627907	KIRC	397.708700000001	963.447900000002	383171.611826732
0.252525252525253	KIRC	313.123599999999	607.1459	190111.70993324
0.305555555555556	KIRC	348.6565	647.423600000002	225728.446393401
0.319148936170213	KIRC	842.731399999999	1826.24860000002	1539037.03942605
0.253731343283582	KIRC	339.891999999999	620.197400000001	210800.1346808
0.258278145695364	KIRC	436.241600000001	736.390800000001	321244.300817281
0.197080291970803	KIRC	546.586099999999	1666.45620000001	910861.795178824
0.248275862068966	KIRC	363.298099999999	702.243300000001	255123.65662773
0.236842105263158	KIRC	733.870999999998	1111.29030000001	815543.723751308
0.1875	KIRC	434.0447	877.317300000001	380794.92428331
0.159090909090909	KIRP	812.3077	1278.46149999997	1038504.12060352
0.340425531914894	KIRP	934.110499999998	1553.9787	1451587.82044634
0.171052631578947	KIRP	477.237000000001	1254.23449999996	598567.110076483
0.0191082802547771	KIRP	415.416000000002	968.315700000002	402253.834831202
0.256756756756757	KIRP	642.297699999999	1475.63099999996	947794.397348674
0.189189189189189	KIRP	472.668799999999	763.263700000002	360770.93716256
0.346153846153846	KIRP	1064.85150000003	1058.59099999997	1127242.2142365
0.208333333333333	KIRP	488.372100000001	830.074000000001	405384.982535401
0.321428571428571	KIRP	557.830099999999	785.056299999999	437928.034334629
0.393939393939394	KIRP	646.939000000002	1175.12369999999	760233.351354294
0.368421052631579	KIRP	353.514500000001	1177.85340000001	416388.255774303
0.282051282051282	KIRP	522.1858	1102.07590000001	575488.385502227
0.189873417721519	KIRP	619.565199999999	1604.74309999997	994242.979700099
0.197530864197531	KIRP	766.337100000001	1568.85320000001	1202270.41161373
0.188679245283019	KIRP	489.709000000002	720.369099999999	352771.231591901
0.307692307692308	KIRP	661.012399999998	1384.43809999998	915130.751132427
0.1875	KIRP	367.689099999999	1014.6695	373082.91525245
0.141304347826087	KIRP	723.794099999999	1512.11590000004	1094460.56693621
0.216216216216216	KIRP	603.747099999999	1753.16159999999	1058466.23183135
0.3	KIRP	696.782999999999	1866.52979999999	1300566.23363339
0.270833333333333	KIRP	404.347099999999	811.606299999998	328170.653746728
0.299145299145299	KIRP	418.421099999999	934.210500000003	390893.385041551
0.128571428571429	KIRP	702.622200000001	1470.20259999997	1032996.9852577
0.235294117647059	KIRP	773.817199999999	1060.92030000002	820958.375969175
0.153846153846154	KIRP	842.960299999998	1391.09510000001	1172637.94282453
0.25	KIRP	562.2582	1535.46350000004	863326.943675723
0.188679245283019	KIRP	680.430700000002	976.820799999998	664658.86071856
0.296296296296296	KIRP	296.764700000001	1406.80930000002	417491.339871716
0.15748031496063	KIRP	1158.84650000002	1466.76440000001	1699754.79126464
0.28125	BRCA	457.242599999999	1731.23910000003	791596.267305672
0.225	BRCA	679.718599999997	2203.23759999999	1497581.57693934
0.208333333333333	BRCA	588.697000000002	1196.6248	704449.429885601
0.25	BRCA	592.263100000002	932.879800000002	552510.282275383
0.246153846153846	BRCA	526.842200000001	1403.90599999996	739636.925633178
0.166666666666667	BRCA	606.422399999998	1178.26270000002	714524.894364491
0.208333333333333	BRCA	404.2838	1541.49930000003	623203.194701354
0.303030303030303	BRCA	514.991899999998	918.861999999999	473206.487217798
0.157303370786517	BRCA	409.464799999999	1093.12480000003	447596.12760705
0.217391304347826	BRCA	771.8876	2524.89960000001	1948938.69248497
0.2	BRCA	674.1625	1187.47129999998	800548.620286239
0.236842105263158	BRCA	489.504500000001	1730.26260000003	846971.328881717
0.259259259259259	BRCA	536.021199999999	984.798400000001	527872.82012608
0.441860465116279	BRCA	651.419100000001	992.008800000001	646213.479688082
0.380952380952381	BRCA	352.037600000001	896.358500000002	315551.895079602
0.3	BRCA	956.999800000001	880.364999999997	842509.128926998
0.204545454545455	BRCA	1017.114	1865.81099999997	1897742.48945397
0.230088495575221	BRCA	562.841500000001	1347.73969999997	758563.834357537
0.175	BRCA	759.084799999999	860.130400000002	652911.912657921
0.181818181818182	BRCA	1068.71000000001	757.393499999999	809434.007385008
0.333333333333333	BRCA	645.0341	924.704199999998	596465.741413219
0.161290322580645	BRCA	540.669899999999	1683.91150000005	910440.262313872
0.232558139534884	BRCA	630.580300000001	2086.2346	1315538.43993838
0.409090909090909	BRCA	180.896	868.977199999999	157194.4995712
0.189189189189189	BRCA	342.8191	4021.27660000005	1378570.42486307
0.358490566037736	BRCA	490.830900000001	965.042999999998	473672.9242287
0.318181818181818	BRCA	424.0771	1025.40530000003	434850.905948645
0.379310344827586	BRCA	777.472500000001	878.777499999998	683225.339868749
0.222222222222222	BRCA	371.2931	900.011	334167.8742241
0.387096774193548	BRCA	558.941900000002	902.127699999996	504236.970680629
0.219512195121951	BRCA	798.149400000001	2056.20290000003	1641157.11091329
0.476190476190476	BRCA	487.7392	3405.50239999995	1660997.01617406
0.302325581395349	BRCA	775.3974	1933.31029999997	1499083.7800132
0.261467889908257	BRCA	581.032400000002	2440.27610000002	1417879.47904566
0.352941176470588	BRCA	321.940099999999	1018.6105	327931.56623105
0.2	BRCA	432.5097	1677.60389999999	725579.959507823
0.352941176470588	BRCA	373.3969	1615.43310000001	603197.711697394
0.166666666666667	BRCA	693.6281	2138.10140000001	1483047.21168935
0.1875	BRCA	333.999999999999	1734.79999999995	579423.199999983
0.217391304347826	BRCA	602.857099999999	823.896099999999	496691.613547309
0.32	BRCA	593.251500000001	746.398500000001	442802.029722751
0.186440677966102	BRCA	354.9752	1282.79529999999	455360.518176558
0.277777777777778	BRCA	523.7909	1283.22530000002	672141.734789782
0.333333333333333	BRCA	483.745099999998	996.797000000001	482195.664444699
0.478260869565217	BRCA	534.452299999998	872.791499999998	466465.424595448
0.142857142857143	BRCA	385.370799999999	984.084000000002	379237.2383472
0.216216216216216	BRCA	760.811800000001	844.968699999999	642862.157590659
0.08	BRCA	660.137799999998	1128.76309999999	745139.189555171
0.459183673469388	BRCA	423.2097	725.2478	306931.90386366
0.307692307692308	BRCA	503.830600000002	1431.19649999999	721080.5913129
0.125	BRCA	1258.8157	1563.87230000001	1968627.00403513
0.26219512195122	BRCA	923.540599999998	941.941600000002	869921.31042896
0.0413793103448276	BRCA	506.508399999999	966.7812	489682.798762079
0.2	BRCA	572.5774	1511.05750000002	865197.374600509
0.190082644628099	BRCA	507.649899999999	1376.98899999996	699028.328151076
0.25	BRCA	789.677400000002	1123.2258	886986.029356923
0.387096774193548	BRCA	374.0433	1066.88850000002	399062.495272056
0.230769230769231	BRCA	276.858199999999	817.362200000003	226293.42744004
0.285714285714286	BRCA	440.9269	861.292399999999	379766.98792556
0.347826086956522	BRCA	716.935	1222.25360000003	876276.384716018
0.541666666666667	BRCA	505.018399999999	1320.68539999997	666970.427611341
0.434782608695652	BRCA	624.995399999998	3274.75229999996	2046705.12363939
0.488372093023256	BRCA	556.609899999999	715.314099999999	398150.909669589
0.342657342657343	BRCA	397.8763	1457.83889999995	580039.547528052
0.382978723404255	BRCA	462.498200000001	1471.77220000001	680691.993310046
0.111111111111111	BRCA	485.8934	748.798300000003	363836.151901221
0.214285714285714	BRCA	554.255199999998	630.6011	349513.938800719
0.260869565217391	BRCA	692.573900000002	936.385399999998	648516.08838106
0.228571428571429	BRCA	765.745399999998	1209.78700000001	926388.830229808
0.333333333333333	BRCA	500.859000000001	873.891	437696.172369001
0.333333333333333	BRCA	837.690700000003	1347.72909999997	1128980.13318935
0.379310344827586	BRCA	454.691299999999	944.266199999999	429349.626024058
0.371428571428571	BRCA	503.781300000001	1598.53670000002	805312.896823721
0.422857142857143	BRCA	770.125499999999	1121.51820000002	863709.764534115
0.333333333333333	BRCA	989.787699999998	1970.76490000005	1950638.85761177
0.454545454545455	BRCA	798.059700000001	967.626299999996	772223.554690108
0.217391304347826	BRCA	788.832600000003	1367.12009999997	1078428.90299524
0.338235294117647	BRCA	514.5101	1144.22869999999	588717.222859863
0.180327868852459	BRCA	475.9568	906.771300000001	431583.96627984
0.363636363636364	BRCA	418.8557	485.930200000001	203534.63407214
0.344827586206897	BRCA	522.012600000001	1271.22640000003	663596.198252659
0.235294117647059	BRCA	503.436899999999	857.3	431596.45437
0.205128205128205	BRCA	767.376	2282.83889999996	1751795.78372637
0.255813953488372	BRCA	709.096599999999	2570.63020000009	1822825.13467738
0.320180383314543	BRCA	432.905100000001	405.781599999999	175664.92412616
0.24	BRCA	571.787099999998	792.168700000002	452951.84368377
0.266666666666667	BRCA	679.351000000001	676.991200000002	459914.648711202
0.148148148148148	BRCA	729.035899999998	991.924	723148.206071598
0.208333333333333	BRCA	439.952099999999	726.6924	319709.847434039
0.307692307692308	BRCA	632.5088	658.029100000002	416209.196406081
0.351351351351351	BRCA	754.247199999999	446.1043	336472.919182959
0.0909090909090909	BRCA	487.959900000001	1607.20009999997	784249.200075977
0.363636363636364	BRCA	437.472800000001	734.204800000001	321194.629629441
0.201550387596899	KIRC	1736.14519999997	1723.45150000004	2992162.04915783
0.159574468085106	KIRC	724.558500000001	862.069	624619.421536501
0.125	KIRC	579.795999999999	1343.53410000004	778975.697043621
0.160337552742616	KIRC	446.3764	822.126500000002	366977.867414601
0.194915254237288	KIRC	4851.36379999991	1386.5169	6726497.89674811
0.327272727272727	KIRC	810.683100000001	1508.94790000002	1223278.56131051
0.245901639344262	KIRC	523.212600000001	1049.21079999998	548960.310616073
0.282051282051282	KIRC	633.304899999998	1224.87220000002	775717.566133792
0.310344827586207	KIRP	291.8127	768.397600000001	224228.17832952
0.303030303030303	KIRP	378.216099999999	750.4288	283824.254063679
0.247524752475248	KIRP	591.6101	1507.71130000002	891977.232964144
0.314814814814815	KIRP	898.370500000001	1011.1492	908386.612378602
0.241935483870968	KIRP	984.501300000001	1033.01890000002	1017008.44997459
0.176470588235294	KIRP	1319.93660000002	1893.67370000001	2499529.22508746
0.2	KIRP	1235.0059	1783.96419999996	2203206.31238873
0.219512195121951	BRCA	661.457500000002	854.090299999999	564944.434612251
0.238095238095238	BRCA	663.094	1453.37619999997	963725.037962783
0.178571428571429	BRCA	913.014600000002	732.071700000001	668392.150346823
0.3	BRCA	807.6101	980.761000000001	792072.4892861
0.4	BRCA	424.019600000001	1459.38380000004	618807.335122498
0.2	BRCA	962.581999999996	1694.98139999996	1631558.58597476
0.240963855421687	BRCA	663.4034	2652.46179999995	1759652.17649009
0.226415094339623	BRCA	454.878500000002	1728.89719999999	786438.1649902
0.347058823529412	BRCA	917.296400000002	1861.88079999997	1707896.55506909
0.183333333333333	BRCA	459.339800000001	918.679499999998	421986.0577941
0.235294117647059	BRCA	746.519800000002	1417.72499999999	1058359.78345499
0.184782608695652	BRCA	719.141600000002	2399.06230000001	1725265.50092169
0.304347826086957	BRCA	342.87	392.430699999999	134552.714109
0.260416666666667	BRCA	435.860500000001	2100.60539999994	915570.919946675
0.285714285714286	BRCA	682.502400000002	1099.24740000003	750238.988693783
0.473684210526316	BRCA	444.648899999999	1216.89520000003	541091.11209529
0.318181818181818	BRCA	369.747899999999	1862.54500000001	688672.102405502
0.216216216216216	BRCA	525.914199999999	766.725599999999	403231.880543519
0.158227848101266	BRCA	898.664199999996	1104.56010000002	992628.618618436
0.2	BRCA	528.989900000001	561.356399999999	296951.86590036
0.428571428571429	BRCA	742.236199999999	1224.39860000001	908792.964149327
0.276923076923077	BRCA	1057.00059999998	1613.31670000002	1705276.71989
0.393939393939394	BRCA	831.877100000001	904.080700000004	752084.030881974
0.294117647058824	BRCA	841.235200000003	1233.31249999998	1037505.88759998
0.195876288659794	BRCA	274.322200000001	2681.02069999994	735463.496669525
0.241379310344828	BRCA	568.2406	1302.49010000004	740127.755918085
0.24390243902439	BRCA	749.5282	706.2524	529356.09011768
0.227272727272727	BRCA	441.1226	1198.50519999996	528687.729937503
0.3	BRCA	1257.16369999996	817.025399999998	1027134.67485795
0.2	BRCA	408.9664	910.0872	372195.08587008
0.266666666666667	BRCA	608.343399999999	678.843000000001	412969.6586862
0.277777777777778	BRCA	634.726700000002	737.620599999999	468187.489290021
0.307692307692308	BRCA	743.282299999999	1039.2724	772472.779798518
0.3	BRCA	501.514500000001	881.410100000003	442039.945596453
0.352941176470588	BRCA	482.743700000001	1865.40119999995	900510.677272417
0.208333333333333	BRCA	531.013099999999	2649.55200000001	1406946.8211312
0.181818181818182	BRCA	380.4045	1146.44350000002	436112.266395756
0.406015037593985	BRCA	408.8699	1200.93369999998	491025.64182562
0.242424242424242	BRCA	900.2097	1242.17030000002	1118213.75311193
0.48	BRCA	802.352000000003	2051.31630000001	1645877.73593761
0.359375	BRCA	1310.46570000004	1765.14770000004	2313165.51628401
0.162790697674419	BRCA	351.528400000001	932.314399999998	327734.98932896
0.395348837209302	BRCA	1053.51030000001	1155.3552	1217178.60335856
0.333333333333333	BRCA	652.311799999999	2693.37339999998	1756919.2506261
0.206896551724138	BRCA	711.145399999999	1026.86720000001	730251.885690884
0	BRCA	410.4364	646.322899999998	265274.444313559
0.282608695652174	BRCA	648.235300000001	1127.05879999999	730599.299335637
0.235294117647059	BRCA	885.881199999998	921.498800000001	816338.462742559
0.254237288135593	BRCA	814.957499999997	930.492599999998	758311.923064495
0.19672131147541	BRCA	327.066499999999	1190.23640000003	389286.453520609
0.258064516129032	BRCA	410.7093	703.392200000002	288889.718087461
0.175	BRCA	346.971300000001	1822.6846	632419.245151983
0.235294117647059	BRCA	864.661699999997	1580.73759999995	1366803.26046987
0.388888888888889	BRCA	451.431099999998	847.998999999998	382813.121368897
0.454545454545455	BRCA	1068.37609999997	1328.0423	1418848.65310898
0.521739130434783	BRCA	629.832300000002	828.949699999999	522099.296135311
0.197183098591549	BRCA	1652.53079999996	839.945300000003	1388035.47856522
0.5	BRCA	400.612999999999	623.467600000002	249769.2256388
0.17910447761194	BRCA	744.238499999999	1212.30359999996	902243.012808569
0.214285714285714	BRCA	610.141999999999	1696.14600000003	1034889.91273202
0.538461538461538	BRCA	418.5242	895.0807	374612.93390294
0.3	BRCA	415.544699999999	699.5104	290677.839314879
0.266666666666667	BRCA	655.433500000001	1224.15750000003	802353.834776271
0.2	BRCA	416.636699999999	945.264699999999	393831.965234489
0.283018867924528	BRCA	419.9799	1303.34380000005	547378.198789638
0.166666666666667	BRCA	852.941199999998	902.505399999998	769784.038882476
0.213114754098361	BRCA	480.4237	2092.04780000006	1005069.34465289
0.379310344827586	BRCA	1160.68839999998	711.853499999999	826240.099949387
0.133333333333333	BRCA	1008.881	1216.49889999999	1227302.62673089
0.228571428571429	BRCA	231.479	950.3392	219983.5676768
0.176470588235294	BRCA	356.756799999999	1072.20079999997	382514.926365427
0.375	BRCA	518.935500000001	706.584800000002	366671.936480402
0.25	BRCA	503.647300000001	655.883299999999	330333.85316009
0.333333333333333	BRCA	355.641	797.789300000002	283726.584441301
0.12	BRCA	727.595600000001	1536.61199999996	1118032.13010717
0.214285714285714	BRCA	405.614600000001	1859.97450000002	754432.81282771
0.444444444444444	BRCA	666.799999999998	1387.20000000003	924984.960000014
0.266666666666667	BRCA	717.223199999998	1238.03260000001	887945.703076322
0.25	BRCA	589.773700000001	1563.03260000005	921835.519722652
0.239130434782609	BRCA	365.280900000001	1191.68519999997	435299.842372669
0.161616161616162	BRCA	651.989699999998	1191.938	777131.299038596
0.175675675675676	BRCA	230.992	2874.36639999995	663955.643468789
0.45	BRCA	971.811700000003	2123.1527	2063304.63474659
0.238095238095238	BRCA	679.221100000001	869.831500000002	590807.908244652
0.111111111111111	BRCA	341.191900000001	1672.56060000001	570664.128979143
0.192307692307692	BRCA	507.340899999999	949.021199999997	481477.269727078
0.283333333333333	BRCA	344.654900000001	1590.54629999995	548189.575971856
0.3	BRCA	475.583899999999	1808.8986	860283.050892539
0.137931034482759	BRCA	604.975799999998	1338.04089999999	809482.363910214
0.437908496732026	BRCA	745.854499999997	544.1624	405865.974770798
0.188405797101449	BRCA	948.726199999997	1865.84970000004	1770180.49565217
0.118881118881119	BRCA	507.298399999998	2759.03330000009	1399653.17863676
0.368421052631579	BRCA	191.3894	747.1624	142998.96343856
0.194444444444444	BRCA	811.479000000002	1000.883	812195.535957003
0.266666666666667	BRCA	1225.21129999999	1664.93530000002	2039897.54332889
0.258064516129032	BRCA	663.434099999999	1494.58070000002	991555.801581884
0.253731343283582	BRCA	223.6345	1698.38540000002	379817.569736304
0.111111111111111	BRCA	874.998299999998	2818.17209999995	2465895.79660738
0.375	BRCA	339.006099999999	1494.55409999996	506662.956679993
0.111111111111111	BRCA	224.3239	959.951400000002	215340.041858461
0.416666666666667	BRCA	1069.98809999998	1233.68919999996	1320032.76309845
0.291666666666667	BRCA	417.8437	810.150799999999	338516.407829959
0.333333333333333	BRCA	444.948099999999	856.654900000001	381166.970110689
0	BRCA	373.8809	836.796699999999	312862.30331303
0.181818181818182	BRCA	552.8565	581.646399999998	321566.992941599
0.264705882352941	BRCA	420.4545	870.867800000002	366160.285415101
0.325581395348837	BRCA	238.26	1026.44589999998	244561.000133996
0.392857142857143	BRCA	584.421399999999	1384.51150000001	809138.149146105
0.259259259259259	BRCA	559.3572	1559.35720000005	872237.67719187
0.25	BRCA	349.328500000001	1035.18690000001	361620.286996655
0.194444444444444	BRCA	371.010800000001	1128.06959999999	418526.004751677
0.333333333333333	BRCA	353.3863	1126.37149999998	398044.256810441
0.0769230769230769	BRCA	483.1758	1332.70319999999	643929.934822556
0.380952380952381	BRCA	378.800399999999	2518.60020000005	954046.763200098
0.442953020134228	KIRC	885.085600000003	1121.76040000001	992853.976690252
0.1875	KIRC	571.5295	996.114400000002	569308.764974801
0.154929577464789	KIRP	571.837499999998	922.5264	527535.190259999
0.241525423728814	UCEC	1196.02530000003	1423.66759999999	1702742.46839032
0.253623188405797	UCEC	2212.67379999993	2378.76870000005	5263439.17875001
0.229508196721311	KIRC	542.075299999998	997.851899999997	540910.868048067
0.269230769230769	KIRC	605.4788	835.885099999996	506110.707285878
0.264150943396226	KIRC	1131.9694	1384.35109999996	1567043.08405629
0.285714285714286	KIRC	376.002899999998	780.374900000002	293423.225487209
0.294117647058824	KIRC	645.9688	1033.81010000004	667809.069724903
0.145454545454545	KIRC	448.288799999998	754.104400000001	338056.556550719
0.173076923076923	KIRC	576.825300000001	860.878999999999	496576.7874387
0.56140350877193	KIRC	494.822599999999	1108.93279999996	548725.011321261
0.25	KIRC	794.855000000002	1353.93809999996	1076184.46847547
0.2375	KIRC	733.7845	523.970699999999	384481.578114149
0.222222222222222	KIRC	571.156000000001	631.438399999999	360649.8307904
0.284403669724771	KIRC	651.8924	585.657399999999	381785.608063759
0.263157894736842	KIRC	536.7886	1193.02539999996	640402.43423042
0.308641975308642	KIRC	400.251500000002	528.0805	211365.012245751
0.333333333333333	KIRC	458.237199999999	954.314700000001	437302.496046839
0.3	KIRC	252.9456	840.125400000003	212506.023378241
0.226016260162602	KIRC	895.5071	1878.48879999994	1682200.05767042
0.276315789473684	KIRC	281.262199999999	1008.1808	283563.14980576
0.292682926829268	KIRC	873.383900000004	625.947400000001	546692.381406863
0.346938775510204	KIRC	515.609299999998	767.920899999998	395947.157704367
0.321428571428571	KIRC	331.1561	677.335099999999	224303.65010911
0.182795698924731	KIRC	366.483300000001	572.577199999998	209839.98176076
0.313432835820896	KIRC	1201.09469999999	1696.33279999996	2037456.33551609
0.296296296296296	KIRC	413.133199999999	518.574100000001	214240.17737012
0.1875	KIRC	712.901799999998	1957.7279	1395667.74382021
0.243243243243243	KIRC	347.021800000001	548.279700000001	190265.008397461
0.244897959183673	KIRC	428.4271	609.969700000002	261327.549658871
0.152173913043478	KIRC	418.9358	536.0384	224565.67593472
0.2	KIRC	557.230099999999	1451.32379999999	808721.306206374
0.272727272727273	KIRC	1060.86009999999	951.221599999999	1009113.04169815
0.141176470588235	KIRC	430.0514	969.791900000002	417060.364303661
0.324675324675325	KIRC	392.990299999999	875.838900000003	344196.192062671
0.305084745762712	KIRC	452.054800000002	777.825299999997	351619.66042644
0.246153846153846	KIRC	345.515	511.6279	176775.1138685
0.204081632653061	KIRC	419.768400000001	691.4806	290261.705093041
0.275	KIRC	331.6849	768.986200000002	255061.110848381
0.235955056179775	KIRC	398.450499999999	1013.0972	403669.0858886
0.155339805825243	KIRC	371.3259	973.873299999999	361624.37960847
0.19047619047619	KIRC	374.703399999999	681.338499999998	255299.852500899
0.149122807017544	KIRP	302.362699999999	860.674300000001	260235.80516861
0.292929292929293	KIRP	865.734299999999	823.7762	713171.311863659
0.25	KIRP	1254.30959999999	1015.9251	1274284.60581096
0.333333333333333	KIRP	860.950999999998	556.916399999999	479477.731496398
0.161764705882353	KIRP	930.647599999998	726.160099999999	675799.154280757
0.212765957446809	KIRP	373.716300000001	1163.25300000001	434726.607123906
0.241935483870968	KIRP	845.887	1483.15160000001	1254578.65746921
0.168421052631579	KIRP	477.564799999999	796.645799999999	380449.992147839
0.294117647058824	KIRC	480.168600000001	726.158799999998	348678.654373679
0.166666666666667	KIRC	339.382199999999	757.1429	256960.823116379
0.301587301587302	KIRC	443.299000000001	982.817900000001	435682.192252102
0.283783783783784	KIRC	520.307800000001	997.007299999997	518750.67484694
0.1	KIRC	354.451300000001	682.815700000001	242024.912525411
0.231578947368421	KIRP	594.041800000001	1419.29750000004	843122.041635527
0.178571428571429	KIRP	392.432899999999	1234.49189999997	484455.236343499
0.25	KIRP	347.651	803.132000000001	279209.642932
0.294964028776978	KIRP	698.373	1633.2916	1140646.7545668
0.37037037037037	KIRP	385.2459	701.639300000002	270303.663603871
0.216216216216216	KIRC	151.2935	879.928600000001	133127.4776441
0.34375	KIRC	370.766500000001	975.5871	361715.014512151
0.2	KIRC	815.381599999999	1492.49090000002	1216949.61802746
0.215189873417722	KIRC	409.351900000001	958.149600000002	392220.359244241
0.285714285714286	KIRC	347.0004	1694.00090000004	587818.989900374
0.34	KIRC	367.901200000001	876.954700000001	322632.686475641
0.236111111111111	KIRC	322.3827	705.848400000002	227553.312982681
0.277777777777778	UCEC	1494.28620000003	824.096100000004	1231435.42970385
0.255102040816327	UCEC	1008.5592	1165.0024	1174973.88854207
0.237825594563986	UCEC	1279.23280000004	1075.9867	1376437.4790038
0.375147928994083	UCEC	963.903300000001	1553.37230000005	1497300.68609864
0.264150943396226	BRCA	579.4814	1403.83310000004	813495.170154365
0.25	BRCA	900.948799999999	1025.81619999998	924207.874410542
0.207547169811321	BRCA	565.3824	2486.94649999996	1406075.78084157
0.197674418604651	BRCA	832.903300000001	775.353799999998	645794.738687539
0.183333333333333	BRCA	480.879499999999	900.573599999999	433067.382481198
0.304347826086957	BRCA	1142.52870000002	870.1149	994131.245547648
0.27027027027027	BRCA	864.576599999998	1228.50679999997	1062138.23222085
0.25	BRCA	599.567600000001	997.357700000003	597983.362530523
0.277777777777778	BRCA	1215.34319999996	2497.98120000002	3035904.46514777
0.142857142857143	BRCA	340.8113	1187.76889999997	404805.062908561
0.25	BRCA	527.1395	733.8219	386826.50945505
0.166666666666667	BRCA	474.809100000001	784.528099999997	372501.081085709
0.431372549019608	BRCA	590.751400000001	1522.54340000003	899444.64511078
0.151515151515152	BRCA	916.291899999997	782.200400000002	716723.89069676
0.25	BRCA	788.871899999998	1142.52030000004	901302.159849596
0.340909090909091	BRCA	1011.9253	1029.68990000001	1041969.26096448
0.266666666666667	BRCA	631.360599999998	919.590500000004	580593.209834301
0.108108108108108	BRCA	591.790999999999	1732.78069999996	1025444.02323367
0.330188679245283	BRCA	395.871499999999	854.634899999997	338325.599815348
0.210526315789474	BRCA	741.378699999998	795.749899999998	589952.026387127
0.324324324324324	BRCA	1140.64650000001	1194.97939999997	1363049.07018207
0.166666666666667	BRCA	575.2983	852.950699999997	490701.087693808
0.396825396825397	BRCA	970.4615	1462.76920000003	1419561.19198583
0.423076923076923	BRCA	541.199	1230.31410000001	665844.760605907
0.166666666666667	BRCA	775.5923	749.684399999998	581449.448070118
0.428571428571429	BRCA	1307.51400000001	1577.86920000004	2063086.06916887
0.210526315789474	BRCA	436.977200000001	710.700900000003	310560.089319482
0	BRCA	446.732999999999	911.731500000001	407300.5481895
0.188405797101449	BRCA	469.697000000001	1723.80049999995	809663.923448481
0.0384615384615385	BRCA	375.139100000001	1014.783	380684.7813153
0.194444444444444	BRCA	300.8903	1362.16750000002	409862.987725256
0.321428571428571	BRCA	621.371000000002	1382.25810000001	858895.097855106
0.176470588235294	BRCA	577.252499999998	970.537899999998	560245.429119747
0.0714285714285714	BRCA	468.614000000001	1015.5376	475895.136886401
0.192307692307692	BRCA	548.358099999999	1383.71569999996	758771.712192146
0.107692307692308	BRCA	701.306100000001	1052.81089999998	738342.706316475
0.148148148148148	BRCA	480.105099999999	723.950000000001	347572.087145
0.5	BRCA	757.6825	1490.39689999995	1129247.64918421
0.454545454545455	BRCA	839.742999999998	706.904399999997	593618.021569196
0.136363636363636	BRCA	737.318800000003	1275.36230000002	940348.600601261
0.13953488372093	BRCA	383.204199999999	2456.85559999996	941477.384713501
0.25	BRCA	564.9351	1077.33180000003	608622.548166195
0.1	BRCA	473.4751	1937.36850000005	917295.744274371
0.285714285714286	BRCA	704.085099999998	976.656400000003	687649.21905964
0.25	KIRC	212.143799999999	884.003800000001	187535.92534644
0.287671232876712	KIRC	552.849999999998	685.620999999999	379045.569849998
0.407407407407407	KIRC	516.010999999999	1814.73009999998	936420.693631085
0.230769230769231	KIRC	413.243900000002	779.547400000002	322143.207810862
0.241935483870968	KIRC	480.968899999999	1136.24569999997	546498.844458716
0.203125	KIRC	319.746199999999	819.0325	261882.5295515
0.138461538461538	KIRC	288.414100000001	1099.97259999999	317247.607453657
0.221052631578947	KIRC	436.4271	648.239700000001	282909.37237587
0.117647058823529	KIRC	377.2488	843.620299999999	318254.745830639
0.207317073170732	KIRC	389.634099999999	737.692300000001	287430.07538743
0.227272727272727	KIRC	322.276300000001	933.353599999999	300797.74479968
0.357142857142857	KIRC	408.163299999999	764.152599999998	311899.046919579
0.323529411764706	KIRC	318.063099999999	678.5347	215816.850139569
0.184615384615385	KIRP	712.251800000001	1389.28439999999	989520.314611917
0.224719101123595	KIRP	976.159499999997	1781.53449999995	1739061.82675269
0.285714285714286	KIRP	732.471099999998	1058.54320000002	775352.302101535
0.192771084337349	KIRP	678.954100000003	1198.61359999999	813803.618035757
0.2	KIRP	392.3185	576.299799999998	226093.073086299
0.283333333333333	KIRP	668.6853	1777.57839999997	1188640.5456775
0.293103448275862	KIRP	333.9695	946.246800000002	316017.570672601
0.138297872340426	KIRP	583.139699999999	1456.35580000002	849258.884305272
0.176470588235294	KIRP	587.2814	1965.65979999993	1154395.43926768
0.181818181818182	KIRP	958.1281	1691.50249999997	1620676.07647022
0.0666666666666667	KIRP	766.312099999999	1603.1915	1228545.04506715
0.257575757575758	KIRP	712.871300000003	979.459100000003	698228.281913835
0.226666666666667	KIRP	639.450200000001	1413.40099999998	903799.552130189
0.236842105263158	KIRP	544.310299999998	937.5838	510336.519453138
0.302919708029197	HNSC	1117.99229999998	1420.51700000002	1588127.0680191
0.324468085106383	HNSC	812.005899999998	891.866500000002	724200.86001235
0.180467091295117	HNSC	756.6575	1240.98119999996	938997.732338971
0.329113924050633	HNSC	642.4447	2180.46200000006	1400826.25545144
0.219594594594595	HNSC	588.9809	2357.21680000007	1388355.67235916
0.21978021978022	HNSC	486.652999999999	1601.30050000003	779277.692226511
0.263157894736842	HNSC	401.0674	810.4069	325027.78832506
0.381231671554252	HNSC	618.456900000001	1797.88199999999	1111912.5282858
0.206896551724138	HNSC	564.838799999998	2147.79950000005	1213160.49222062
0.227665706051873	HNSC	639.095300000001	1537.31829999998	982492.900133982
0.279863481228669	HNSC	434.547899999999	795.2092	345556.48792068
0.253086419753086	HNSC	388.7725	656.891499999999	255381.35068375
0.337912087912088	HNSC	486.618000000001	1072.58719999999	521940.238089598
0.23859649122807	HNSC	704.557899999999	2127.52720000003	1498966.0962249
0.22463768115942	HNSC	682.7147	751.406100000002	512995.990139671
0.194158075601375	HNSC	753.575799999999	1335.10420000001	1006102.21559837
0.251141552511416	HNSC	739.497799999999	706.494800000002	522451.350311441
0.256198347107438	HNSC	926.366599999999	4238.58519999996	3926483.76053428
0.253846153846154	HNSC	623.464399999999	1108.10809999999	690865.951701632
0.282051282051282	HNSC	450.8929	1637.75509999997	738452.146528774
0.252577319587629	HNSC	1041.54709999997	860.885800000002	896653.108421159
0.28735632183908	HNSC	492.516399999998	1739.94390000002	856950.905829965
0.246153846153846	HNSC	318.7553	1687.13199999996	537782.266799587
0.227272727272727	HNSC	438.682099999999	1632.7896	716275.570586157
0.20952380952381	HNSC	355.486199999999	2339.42910000006	831634.760928438
0.214953271028037	HNSC	1833.56160000006	1393.83559999997	2555683.43287298
0.191304347826087	HNSC	1163.95219999997	817.5896	951635.213617093
0.235294117647059	HNSC	731.468100000002	909.1434	665009.395425542
0.125	HNSC	607.276	1605.86190000001	975201.391184404
0.282258064516129	HNSC	512.957500000001	1033.03949999997	529905.359321235
0.212121212121212	HNSC	549.726099999999	762.507599999999	419170.329168359
0.275229357798165	HNSC	531.5692	1005.5453	534516.910684762
0.3421926910299	HNSC	382.2925	1158.9999	443076.969270751
0.275510204081633	HNSC	760.932299999999	1160.04439999996	882715.253394088
0.264705882352941	HNSC	477.220999999999	1153.75850000002	550597.785128507
0.320910973084886	HNSC	514.127099999999	2769.42480000007	1423836.34109211
0.227053140096618	HNSC	983.508899999998	1945.48790000004	1913404.66449235
0.299492385786802	HNSC	763.065900000001	3709.1886999999	2830355.41363526
0.304498269896194	HNSC	772.980300000001	889.273800000002	687391.128706142
0.213592233009709	HNSC	813.652400000001	3484.8960000001	2835493.99415048
0.28	HNSC	456.750700000001	1246.72839999998	569444.069409873
0.231707317073171	HNSC	440.9824	1465.17600000005	646116.828902421
0.469565217391304	HNSC	459.779399999999	1013.8622	466152.95399868
0.264367816091954	HNSC	626.205100000001	2319.34619999999	1452386.41910562
0.220338983050847	HNSC	708.643099999999	2212.82530000005	1568103.38035046
0.202558635394456	HNSC	787.062900000001	1472.52560000001	1158970.26906025
0.268817204301075	HNSC	558.338999999998	1179.84209999999	658751.858271891
0.265957446808511	HNSC	449.342100000001	682.2368	306557.716409281
0.261538461538462	HNSC	915.255099999999	2098.83009999998	1920964.95305849
0.416243654822335	HNSC	399.391599999999	1144.7197	457191.432534518
0.242009132420091	HNSC	947.663300000002	2019.05189999998	1913381.38642525
0.342105263157895	HNSC	462.1938	1441.95950000002	666464.740751108
0.205882352941176	HNSC	585.628900000001	918.857000000004	538109.214167303
0.177083333333333	HNSC	844.238400000002	1443.24230000004	1218440.57016436
0.158774373259053	LIHC	574.565399999998	1012.3513	581662.029625017
0.0815450643776824	LIHC	446.1025	997.278700000002	444888.521266751
0.156405990016639	LIHC	336.566000000001	1106.40620000003	372378.709109211
0.123152709359606	LIHC	554.353999999999	1018.782	564765.876827998
0.0986842105263158	LIHC	657.882399999998	929.8824	611753.265029759
0.149532710280374	LIHC	577.137500000001	823.8848	475494.813760001
0.136065573770492	LIHC	632.0712	1442.61829999998	911837.480022948
0.0773480662983425	LIHC	486.390400000002	1002.3253	487521.403597121
0.146218487394958	LIHC	752.0918	1116.4236	839653.034886479
0.162857142857143	LIHC	721.233700000001	519.357299999999	374577.98710101
0.10580204778157	LIHC	534.666699999999	585.333300000001	312958.22391111
0.154430379746835	LIHC	588.865100000002	1190.57820000002	701089.950800836
0.136842105263158	LIHC	723.3826	1248.0897	902846.37221922
0.129770992366412	LIHC	955.186599999999	620.147300000002	592356.390986181
0.112068965517241	LIHC	680.901099999998	1461.31240000005	995009.22060367
0.0938775510204082	LIHC	1104.79390000001	1435.36519999998	1585782.71723227
0.231707317073171	LIHC	970.803399999999	924.377199999999	897388.528642478
0.232876712328767	LIHC	1705.83939999999	1202.91970000002	2051987.8192962
0.243243243243243	LIHC	884.1706	1256.4929	1110954.08128874
0.11377245508982	LIHC	1127.55100000001	1466.83669999996	1653933.18792167
0.184782608695652	LIHC	698.579700000001	624.232899999998	436076.432012129
0.163551401869159	LIHC	528.246	753.4729	398019.0455334
0.00328839197632358	SKCM	274.350599999999	664.610400000002	182336.26200624
0.160349854227405	SKCM	426.180499999999	1116.85589999997	475982.205889936
0.0591471801925722	SKCM	761.904800000002	1261.03580000001	960789.228991847
0.00915996425379803	SKCM	841.494200000002	808.799899999998	680600.42481058
0.0285576768811166	SKCM	883.229900000001	667.790800000002	589812.801504923
0.19375	SKCM	644.1496	803.377599999998	517495.359688958
0.214814814814815	SKCM	1163.44029999999	1816.22149999997	2113065.28682639
0.202464788732394	SKCM	814.221700000002	1051.56949999998	856210.705958133
0.238636363636364	SKCM	348.2421	651.250499999998	226792.841746049
0.206647398843931	SKCM	1183.69450000002	1551.59959999997	1836619.91272221
0.17877094972067	SKCM	672.880799999998	1085.64540000002	730509.945268333
0.197707736389685	SKCM	524.3249	823.876700000003	431979.068339832
0.191780821917808	SKCM	1088.4808	1748.55529999997	1903268.8717882
0.188612099644128	SKCM	921.387300000002	1109.24859999999	1022047.57258278
0.238095238095238	BRCA	487.364600000002	1369.58479999999	667487.148218078
0.346938775510204	BRCA	420.416400000001	1732.03489999999	728175.877332357
0.482142857142857	BRCA	930.9564	910.582900000003	847712.978485562
0.303030303030303	BRCA	431.9861	1085.18040000004	468782.848792456
0.219512195121951	BRCA	561.0925	652.611399999998	366175.361954499
0.523809523809524	BRCA	616.274300000002	482.032199999999	297064.05663246
0.307692307692308	BRCA	494.038700000001	975.409800000001	481890.189559261
0.208333333333333	BRCA	326.326900000001	1951.43490000005	636805.701468829
0.386363636363636	BRCA	964.242900000001	1812.52039999999	1747709.92680516
0.258064516129032	BRCA	698.132100000001	976.9847	682064.380278871
0	BRCA	485.346700000001	650.464599999998	315700.847076819
0.345454545454545	BRCA	562.024100000001	1183.74029999997	665290.576741215
0.25	BRCA	1165.24849999999	2783.69910000001	3243701.20072633
0.211764705882353	BRCA	1162.53959999998	1323.62270000004	1538763.80420895
0.314285714285714	BRCA	434.1801	1041.06590000003	452010.096568601
0.235294117647059	BRCA	320.470899999999	1437.86790000001	460794.819994111
0.217391304347826	BRCA	570.933300000001	930.366900000004	531177.444427773
0.216216216216216	BRCA	353.8711	1261.49060000003	446405.066261672
0.222222222222222	BRCA	507.486799999999	914.552099999997	464123.118662278
0.0833333333333333	BRCA	410.949699999999	879.043399999998	361242.621516978
0.3125	BRCA	847.770699999999	745.859900000002	632318.169524931
0.111111111111111	BRCA	355.425599999999	444.769299999999	158082.395314079
0.333333333333333	BRCA	402.708100000001	775.325999999999	312230.0603406
0.222222222222222	BRCA	343.457800000001	1069.10569999998	367192.691689456
0.333333333333333	BRCA	484.120199999999	658.369100000002	318729.78036582
0.222222222222222	BRCA	554.784600000001	1193.07809999999	661901.356477257
0.183673469387755	BRCA	1568.03039999999	1758.61759999998	2757565.858775
0.4	BRCA	612.4328	809.2863	495633.47471064
0.246153846153846	BRCA	327.5608	1496.31539999997	490134.26947631
0.214953271028037	BRCA	932.296800000003	1148.76589999999	1070990.77251911
0.189873417721519	BRCA	575.148499999999	1725.44539999997	992387.333641881
0.518518518518518	BRCA	647.9268	633.7482	410622.44323176
0.3	BRCA	573.180999999999	787.224999999998	451222.412724998
0.263157894736842	BRCA	408.987300000001	1390.03579999999	568506.988745338
0.263157894736842	BRCA	377.801099999999	1832.63309999999	692370.801076406
0.421052631578947	BRCA	650.364299999998	998.902100000001	649650.265035029
0.235294117647059	BRCA	554.483200000002	1168.58370000002	647960.029443853
0.384615384615385	BRCA	743.695899999998	1018.8182	757690.918185376
0.421052631578947	BRCA	483.013599999999	849.838400000001	410483.50500224
0.2	BRCA	480.6481	1466.24660000001	704748.642421466
0.172413793103448	BRCA	634.651	1283.81720000004	814775.869797224
0.333333333333333	BRCA	501.095700000001	817.385	409588.108744501
0.22	BRCA	368.195500000001	723.960600000001	266559.035097301
0.391304347826087	BRCA	1008.1733	1162.23949999996	1171738.83210531
0.294117647058824	BRCA	626.9803	1183.38930000003	741961.778330807
0.230769230769231	BRCA	381.546800000001	1047.89940000003	399822.662791933
0	BRCA	570.7909	800.535700000003	456938.492685131
0.4	BRCA	465.575000000001	454.038000000001	211388.741850001
0.39873417721519	BRCA	449.152499999999	1143.22029999999	513480.255795745
0.0344827586206897	BRCA	737.3553	822.669099999999	606599.421031229
0.261904761904762	BRCA	544.006499999998	947.458199999997	515423.419278297
0.3	BRCA	415.620099999999	699.764500000001	290836.191466449
0.315789473684211	BRCA	609.8131	1332.24300000004	812419.233783325
0.212121212121212	BRCA	628.693800000001	1036.4096	651584.289780478
0.25	BRCA	494.028100000001	1323.18849999999	653692.300596847
0.263157894736842	BRCA	449.814600000001	1025.003	461061.314443801
0.212121212121212	BRCA	709.252600000002	745.472500000002	528728.308853503
0.288888888888889	BRCA	493.3891	798.995799999998	394215.818665779
0.277777777777778	BRCA	330.243300000001	875.6277	289170.18121941
0.210526315789474	BRCA	496.393100000001	1632.55180000002	810387.448912592
0.352941176470588	BRCA	558.827900000002	1197.69379999998	669304.711097011
0.222222222222222	BRCA	442.1718	2588.44110000003	1144535.66038099
0.307692307692308	BRCA	447.563699999999	973.8625	435865.503791249
0.2	BRCA	473.782899999999	744.354800000001	352662.57577292
0.25	BRCA	338.199500000001	990.267599999997	334908.007186201
0.087719298245614	BRCA	970.781399999997	2247.86609999999	2182186.59957052
0.375	BRCA	1299.57970000003	855.4394	1111711.6788202
0.25	BRCA	1081.29419999999	963.005899999999	1041292.69423577
0.333333333333333	BRCA	861.788600000001	1520.32519999999	1310198.92565272
0.844736842105263	BRCA	604.2485	1253.22310000003	757258.178340368
0.277777777777778	BRCA	694.857100000002	875.604399999999	608419.934131241
0.276150627615063	BRCA	424.1307	928.872499999999	393963.34363575
0.206896551724138	BRCA	605.2237	1027.0189	621576.17862793
0.36	BRCA	775.330399999998	693.5879	537759.783942159
0.333333333333333	BRCA	358.5973	645.9276	231627.89335548
0.481707317073171	BRCA	641.132900000001	1535.88670000004	984707.494042454
0.333333333333333	BRCA	573.138700000002	702.702300000001	402745.882709012
0.125	BRCA	1180.54670000001	2285.81799999995	2698514.89670055
0.178571428571429	BRCA	782.8735	861.220200000001	674226.4722447
0.285714285714286	BRCA	1079.0201	1396.62570000004	1506987.20247661
0.294117647058824	BRCA	846.691199999998	659.926499999998	558753.960196797
1	BRCA	646.039899999999	1680.56390000003	1085711.33389963
0.25	BRCA	543.697799999998	1050.06589999998	570918.519685006
0.238095238095238	BRCA	604.605000000001	974.157	588980.192985001
0.2	BRCA	421.069400000001	937.599800000002	394794.585226122
0.478991596638655	BRCA	662.337999999998	779.438800000002	516251.9359144
0.2625	BRCA	457.0189	2583.73050000007	1180813.67100648
0.372093023255814	BRCA	577.481399999999	1449.58810000002	837110.165411348
0.270877944325482	BRCA	873.75	1208.125	1055599.21875
0.478260869565217	BRCA	630.4348	1116.45959999997	703854.984634061
0.25	BRCA	429.811700000001	731.133999999998	314249.9474678
0.436363636363636	BRCA	913.498100000002	1228.01549999997	1121789.82602053
0.257142857142857	BRCA	1104.55950000004	1236.6534	1365957.26117735
0.166666666666667	BRCA	929.479799999998	956.069399999999	888647.194698118
0.363636363636364	BRCA	463.915299999999	904.689799999999	419699.439973939
0.0975609756097561	BRCA	669.183299999998	1005.1476	672627.987955075
0.491304347826087	BRCA	625.469200000002	726.906500000001	454657.627029802
0.226666666666667	BRCA	468.495199999998	2337.81640000004	1095255.7618813
0.166666666666667	BRCA	913.224399999999	2986.62700000009	2727460.65009888
0.16	BRCA	572.1853	1582.65419999996	905571.468223236
0.232876712328767	BRCA	341.1892	2247.65839999996	766876.771369266
0.326923076923077	BRCA	712.627500000002	1417.16499999996	1009910.75103747
0.221518987341772	BRCA	311.2105	1097.02540000001	341405.823246702
0.147058823529412	BRCA	338.185299999999	764.493400000002	258540.42982702
0.461538461538462	BRCA	471.3115	1016.3934	479037.8979441
0.125	BRCA	584.6833	983.585399999999	575085.95750382
0.0909090909090909	BRCA	746.5676	453.1847	338333.01383572
0.365079365079365	BRCA	708.644600000002	1002.4255	710363.417477304
0.5	BRCA	516.534900000001	641.265300000001	331235.907608971
0.333333333333333	BRCA	334.874700000001	828.2611	277363.687384171
0.378571428571429	CESC	409.0775	1937.71489999996	792675.567004732
0.381944444444444	CESC	750.667500000002	1618.12070000003	1214670.62056728
0.371428571428571	CESC	806.1554	1790.02230000005	1443036.14326546
0.211538461538462	THCA	473.136200000001	2367.3469	1120077.51634778
0.209459459459459	THCA	339.946700000001	1298.98329999999	441585.086190106
0.234375	THCA	678.465399999999	723.601400000002	490938.513291561
0.262820512820513	THCA	410.5917	787.185400000002	323211.791601181
0.222222222222222	THCA	344.139699999999	924.189500000001	318050.297273149
0.17	THCA	439.441299999999	1345.78910000002	591395.311629839
0.22463768115942	THCA	384.803400000001	718.3589	276426.94714026
0.224242424242424	THCA	417.505499999999	1076.58640000001	449480.743225202
0.225806451612903	THCA	668.431300000002	1305.09970000004	872369.489100642
0.290322580645161	THCA	534.740499999999	1964.23339999998	1050355.15043268
0.165289256198347	THCA	412.9685	1228.80349999996	507457.138189734
0.22	THCA	460.5523	772.8729	355948.39170267
0.201834862385321	THCA	450.530799999999	777.070100000001	350094.013809079
0.21078431372549	THCA	488.829999999999	825.444900000002	403502.230467
0.270042194092827	THCA	477.2072	732.256200000002	349437.930884641
0.117788461538462	THCA	551.159100000002	768.984800000002	423832.970281682
0.26046511627907	THCA	446.283999999999	1522.07509999998	679277.76392839
0.24375	THCA	376.966	615.931000000003	232185.045346001
0.216981132075472	THCA	507.3913	921.739099999998	467682.400209829
0.217054263565891	THCA	394.2252	788.450399999999	310827.01663008
0.269230769230769	THCA	743.8539	1199.83520000004	892502.09287731
0.260683760683761	THCA	345.864699999999	583.601900000001	201847.29606293
0.268292682926829	THCA	408.270000000001	721.9582	294753.874314001
0.118483412322275	THCA	510.844900000001	1011.6543	516798.43971807
0.228571428571429	THCA	517.362599999998	1063.68619999998	550311.458016108
0.219858156028369	THCA	766.911099999999	1187.56130000002	910753.942900444
0.2	THCA	1027.02700000003	1754.82629999997	1802253.99041012
0.291139240506329	THCA	398.432599999999	834.796199999999	332610.020436118
0.196850393700787	THCA	895.224200000002	940.058500000001	841563.118615703
0.253731343283582	THCA	444.6337	884.724600000003	393378.372379021
0.336363636363636	THCA	628.779000000002	1720.74850000005	1081970.52108154
0.258064516129032	THCA	540.313300000002	765.380199999997	413545.101616659
0.275132275132275	THCA	589.445300000001	908.5467	535538.582145511
0.225609756097561	THCA	651.565099999998	583.607900000002	380258.53972429
0.263565891472868	THCA	781.768699999998	960.330099999997	750756.013847866
0.258928571428571	THCA	483.847799999998	618.808300000001	299409.034576739
0.247191011235955	THCA	614.100000000003	945.723500000002	580768.801350003
0.179487179487179	THCA	555.7516	851.093900000003	472996.796675241
0.313253012048193	THCA	463.673500000002	689.795899999998	319840.07923865
0.326315789473684	THCA	464.9618	729.932299999999	339390.63608614
0.300970873786408	THCA	708.567600000001	997.0228	706458.052541281
0.24	THCA	452.776699999999	789.217700000002	357339.38578759
0.322033898305085	THCA	499.402500000001	721.265399999997	360201.743923499
0.296296296296296	BLCA	1189.03149999998	1252.04199999996	1488717.37732293
0.361111111111111	BLCA	577.2654	981.796100000003	566756.918384942
0.297709923664122	BLCA	300.537899999999	1250.04339999998	375685.418344854
0.359307359307359	BLCA	904.523999999998	2796.24939999997	2529274.69228557
0.397849462365591	BLCA	440.937999999999	990.047999999997	436549.785023998
0.285714285714286	KIRC	470.427399999999	879.658100000003	413815.272871941
0.371428571428571	KIRC	364.629799999999	1158.00019999997	422241.381325946
0.2	KIRC	552.854499999999	1164.27260000003	643673.346136714
0.333333333333333	KIRC	303.9604	816.171600000001	248083.84600464
0.19047619047619	KIRC	374.371900000001	981.6942	367518.722872981
0.17741935483871	KIRC	768.9196	587.227800000002	451530.965084881
0.257142857142857	KIRC	306.4472	862.0027	264158.31380744
0.244444444444444	KIRC	546.676600000002	947.348800000002	517893.420998083
0.261904761904762	KIRC	376.972199999999	1214.04019999999	457659.405082433
0.232558139534884	KIRC	528.099899999999	1029.2758	543560.447052417
0.314814814814815	KIRC	452.192199999999	817.397399999999	369620.728580279
0.1875	KIRC	379.277	721.755999999999	273745.450411999
0.285714285714286	KIRC	658.438199999999	834.408900000002	549406.69417998
0.21875	KIRC	350.048	684.740899999999	239692.182563199
0.245283018867925	KIRC	570.103999999999	340.96	194382.65984
0.232558139534884	KIRC	359.0715	728.327799999998	261521.755637699
0.342857142857143	KIRC	427.072299999999	653.8489	279240.753575469
0.333333333333333	KIRC	369.170999999999	611.139899999998	225615.128022899
0.111111111111111	KIRC	366.519599999999	754.943800000001	276701.69959848
0.26530612244898	KIRC	358.5635	918.536200000002	329353.5547487
0.234375	KIRC	852.697099999998	708.506200000003	604141.182072021
0.18	KIRC	364.0516	647.77	235821.704932
0.232558139534884	KIRC	313.0494	1106.49090000004	346386.312350471
0.257731958762887	KIRC	862.912599999998	1044.27179999998	901115.294044662
0.1875	KIRC	306.218599999999	688.760099999998	210911.153557859
0.315789473684211	KIRC	320.9205	738.8634	237116.4117597
0.276923076923077	KIRC	603.225799999999	613.824899999999	370275.016362419
0.244444444444444	KIRC	292.5936	756.087200000001	221226.27576192
0.288888888888889	KIRC	1019.9013	678.346700000001	691846.68118071
0.272727272727273	KIRC	502.200300000002	565.9153	284202.833434591
0.133333333333333	KIRC	577.270300000001	1097.98189999999	633832.340807567
0.351851851851852	KIRC	531.0885	956.116500000001	507782.47781025
0.183673469387755	KIRC	420.582299999999	684.923599999999	288066.743012279
0.302325581395349	KIRC	839.366500000002	758.370999999999	636551.211971501
0.323529411764706	KIRC	769.841300000001	750.992100000002	578144.734553733
0.285714285714286	KIRC	241.1626	1253.20760000001	302226.803155763
0.304347826086957	KIRC	426.185	807.929000000002	344327.220865001
0.244444444444444	KIRC	507.088699999999	895.812699999999	454256.497486489
0.2	KIRC	299.613099999999	775.575099999997	232372.459993809
0.245283018867925	KIRC	602.102100000002	1061.56160000004	639168.468639384
0.242424242424242	KIRC	679.927700000001	571.428599999998	388530.133712219
0.2265625	KIRC	365.904399999999	829.412400000003	303485.64657456
0.296296296296296	KIRC	506.883599999999	876.095100000003	444078.238230361
0.245283018867925	KIRC	472.275299999999	812.619499999997	383780.118148348
0.235294117647059	KIRC	350.465899999999	1066.42809999999	373746.683851785
0.25531914893617	KIRC	699.714399999999	880.457000000004	616068.441480802
0.355555555555556	KIRC	979.021000000002	931.779299999998	912231.502065301
0.19327731092437	KIRC	550.243900000001	951.544700000003	523581.666752332
0.369565217391304	KIRC	558.568699999998	572.971800000002	320044.11346266
0.298245614035088	KIRC	617.9585	1309.19100000002	809025.706573511
0.295454545454545	KIRC	499.728500000002	1098.77090000001	549087.133700659
0.233333333333333	KIRC	433.8817	945.281700000002	410140.430974891
0.265625	KIRC	402.051899999999	634.818899999999	255230.144900909
0.283018867924528	KIRC	436.2512	694.100899999999	302802.35054608
0.361111111111111	KIRC	410.313900000001	644.394599999998	264404.06146494
0.284090909090909	KIRC	902.9779	983.669499999998	888231.819404048
0.228070175438596	KIRC	339.552400000001	846.727700000002	287508.422681481
0.294871794871795	KIRC	282.9091	621.818200000001	175918.027325621
0.192982456140351	KIRC	310.570799999999	608.270800000002	188911.14897264
0.339622641509434	KIRC	494.930899999998	863.1336	427191.489468239
0.193548387096774	KIRC	1019.6378	1026.15540000001	1046306.83451412
0.309859154929577	KIRC	645.573800000001	816.3934	527042.189532921
0.34375	KIRC	339.186400000001	1189.24270000001	403374.950139285
0.261904761904762	KIRC	342.923699999999	743.056700000002	254811.75287379
0.195652173913043	KIRC	501.006800000001	707.209000000001	354316.518021201
0.192771084337349	KIRC	245.211000000001	889.453900000004	218103.880272902
0.191780821917808	KIRC	514.400500000001	511.051600000001	262885.198565801
0.22	KIRC	297.2666	656.552800000002	195171.21857648
0.272727272727273	KIRC	513.3981	625.631099999999	321197.818040909
0.24	KIRC	274.229599999999	770.582100000001	211316.42105016
0.315068493150685	KIRP	490.633699999999	927.062600000002	454848.15356962
0.151898734177215	KIRP	496.768599999999	2989.49330000002	1485086.40135039
0.215384615384615	KIRP	685.5119	1373.29080000003	941407.185560537
0.36036036036036	KIRP	371.911200000001	822.560399999998	305919.42543648
0.290322580645161	KIRP	454.9591	1091.64179999998	496652.37085037
0.298245614035088	KIRP	662.4535	913.754600000001	605319.9329111
0.162790697674419	KIRP	822.812099999997	1074.60549999998	884198.40812653
0.213333333333333	KIRP	505.465299999998	1648.80989999999	833416.190746461
0.428571428571429	KIRP	484.652900000001	1236.0873	599073.29459817
0.185185185185185	KIRP	459.083999999998	1287.19900000004	590932.465716017
0.263636363636364	KIRP	611.964899999998	1240.3952	759078.324528475
0.264705882352941	KIRP	577.240599999999	959.315999999999	553756.143429598
0.0909090909090909	KIRP	682.802500000002	1200.9799	820032.078169751
0.304347826086957	KIRP	943.595200000002	881.391699999999	831676.977439841
0.171875	KIRP	814.047899999997	1185.1401	964760.809610788
0.195402298850575	KIRP	614.889500000002	1129.49939999999	694517.321316296
0.307692307692308	KIRP	737.624100000002	1878.21980000005	1385420.18957722
0.344827586206897	KIRP	418.167199999999	741.736099999998	310169.708075918
0.215686274509804	KIRP	458.749500000001	1079.17130000002	495069.29428936
0.324324324324324	KIRP	615.9198	1499.07919999995	923312.56104813
0.0345454545454545	KIRP	494.457399999998	1145.29429999999	566299.241812814
0.236363636363636	KIRP	520.3725	809.080299999998	421023.138411749
0.0340136054421769	KIRP	439.544800000001	788.525400000001	346592.239237921
0.0363636363636364	KIRP	524.0894	1323.10160000003	693423.523683056
0.0134831460674157	KIRP	471.7492	698.916400000001	329713.25256688
0.157894736842105	KIRP	450.877200000001	938.157900000001	422994.007109881
0.148351648351648	KIRP	463.014200000001	730.023699999999	338011.33943654
0.0607476635514019	KIRP	447.9005	933.903599999999	418295.8893918
0.294117647058824	KIRP	619.782699999998	1020.0114	632185.41952278
0.0474308300395257	KIRP	565.030699999999	1050.59349999997	593617.580720435
0.171052631578947	KIRP	538.699700000001	821.052600000003	442300.789304222
0.0458715596330275	KIRP	483.599699999999	1017.1012	491869.835189641
0.0185185185185185	KIRP	393.513200000001	893.7053	351684.832459961
0.0740740740740741	KIRP	541.422300000001	1783.61980000001	965691.534441549
0.120689655172414	KIRP	613.5003	1275.44909999999	782488.405484726
0.190789473684211	UCEC	1456.07479999995	312.149499999999	454513.020782584
0.358490566037736	BLCA	777.439	2224.84759999999	1729683.29329639
0.442715700141443	BLCA	681.990300000002	1389.94050000005	947925.938577185
0.431519699812383	BLCA	558.608100000002	2280.83030000004	1274090.28030545
0.22360248447205	BLCA	706.933899999998	1520.58499999996	1074953.08433147
0.397260273972603	BLCA	522.816299999999	1186.19639999999	620162.812921316
0.221153846153846	BLCA	2597.85300000005	2159.37239999993	5609732.06745713
0.298076923076923	BLCA	903.574800000001	1091.2512	986027.084789758
0.327160493827161	BLCA	622.4534	2148.2445	1337182.0930563
0.450511945392491	BLCA	1041.65830000004	1806.87649999995	1882147.90329996
0.377551020408163	BLCA	756.625000000001	2141.921	1620630.97662501
0.302752293577982	BLCA	965.410699999997	3229.77150000007	3118055.96465511
0.234782608695652	BLCA	828.644500000001	1539.64189999997	1275815.79240453
0.15	BLCA	677.847800000001	1257.19830000001	852189.10181875
0.331983805668016	BLCA	950.337899999999	1601.23419999997	1521713.54703615
0.469448584202683	BLCA	1096.83159999997	1991.81199999994	2184682.34285906
0.381818181818182	BLCA	775.174499999997	496.510499999999	384882.278582248
0.354651162790698	BLCA	1362.33399999998	1348.35780000002	1836913.6751052
0.448581560283688	BLCA	560.586699999998	1126.59439999999	631553.836934473
0.293577981651376	BLCA	825.057900000001	1094.41729999999	902957.639261666
0.316455696202532	BLCA	1223.54469999997	2243.38109999995	2744877.05498504
0.352941176470588	BLCA	952.909800000001	1697.46780000001	1617533.70180445
0.424242424242424	BLCA	726.581099999999	943.414199999999	685466.927191618
0.26797385620915	LIHC	1064.23069999997	1138.45280000004	1211576.42026097
0.302083333333333	LIHC	830.6491	1244.99760000001	1034156.13594217
0.288288288288288	LIHC	859.767899999999	1044.00389999997	897601.040694781
0.424390243902439	BLCA	705.2777	3524.55250000005	2485788.28072928
0.32183908045977	BLCA	491.741299999998	4148.94249999993	2040206.37857521
0.419689119170984	BLCA	801.2863	1282.59410000001	1027725.08079084
0.297777777777778	BLCA	1209.04580000004	1942.26880000003	2348291.93511115
0.275	BLCA	802.686000000001	2931.20950000004	2352840.82871703
0.148148148148148	CESC	970.358400000001	1978.41990000002	1919776.36869218
0.36046511627907	CESC	706.508899999998	2160.65090000005	1526519.09064304
0.3	CESC	746.2894	1487.56290000002	1110152.42410328
0.486842105263158	CESC	799.537500000002	1911.95180000006	1528677.16229255
0.365384615384615	CESC	624.9973	2338.88929999994	1461799.49749885
0.417840375586854	CESC	667.166599999999	1276.48630000002	851629.024717596
0.409556313993174	CESC	625.620200000001	1435.72399999999	898217.936024795
0.341463414634146	CESC	655.718700000001	1607.80530000005	1054268.00116915
0.238095238095238	CESC	569.5432	1814.53359999997	1033455.2730515
0.455005055611729	CESC	980.092699999998	1826.89279999996	1790524.29696252
0.417721518987342	CESC	707.8689	2529.41520000002	1790494.3552673
0.392638036809816	CESC	662.796599999999	2020.69660000006	1339310.8361116
0.388888888888889	CESC	347.682099999999	1038.07949999998	360921.660526942
0.28	CESC	1188.66329999998	2916.24370000006	3466431.86004623
0.36	CESC	548.0674	2048.56289999994	1122750.54233943
0.294117647058824	CESC	1140.79819999998	1087.02880000001	1240080.49838815
0.379310344827586	CESC	1417.29509999998	2108.13370000007	2987847.56315493
0.434192672998643	CESC	864.7967	1502.04850000005	1298966.58603999
0.309859154929577	CESC	537.700299999999	3636.89920000007	1955561.79090979
0.353448275862069	CESC	879.1023	2764.59399999994	2430360.94396615
0.468253968253968	CESC	568.7593	1678.25110000002	954520.92086024
0.376470588235294	CESC	926.084599999998	1277.98610000003	1183523.24622408
0.414012738853503	CESC	737.343000000002	1365.43589999995	1006794.60281367
0.464788732394366	CESC	709.800599999999	3717.15019999994	2638435.44225007
0.409836065573771	CESC	832.805999999998	1405.70739999997	1170681.55696437
0.318840579710145	CESC	966.539600000001	2127.48840000007	2056301.78714071
0.12280701754386	CESC	560.3208	1585.29789999998	888275.38756631
0.22680412371134	CESC	902.752299999999	2773.57800000008	2503853.91872947
0.248062015503876	CESC	1200.96399999999	1627.36369999995	1954405.21860672
0.303030303030303	CESC	844.041699999999	1799.56069999995	1518904.27248115
0.532786885245902	CESC	640.960500000001	1438.16819999997	921809.008556079
0.265625	CESC	693.606199999999	1126.39799999996	781276.636467572
0.154929577464789	CESC	767.473100000003	1611.89520000002	1237086.20601914
0.315068493150685	CESC	639.439499999999	2036.3025	1302092.25244875
0.412073490813648	CESC	1129.22470000001	3222.94800000008	3639432.48841574
0.326923076923077	CESC	581.8241	1723.15649999995	1002573.97977162
0.391447368421053	CESC	567.9565	2143.58810000002	1217464.79471766
0.163265306122449	CESC	866.104199999997	3168.74539999996	2744463.69967064
0.252631578947368	CESC	1034.75669999998	1125.12410000004	1164229.70080649
0.207446808510638	CESC	653.105200000001	1914.75679999995	1250537.62281533
0.247967479674797	CESC	592.643100000001	2740.12260000008	1623914.75204411
0.263157894736842	CESC	888.937700000001	991.220399999999	881133.18256908
0.0813953488372093	CESC	1000	1223.52939999999	1223529.39999999
0.345070422535211	CESC	616.182099999999	3118.3232	1921454.93785471
0.341772151898734	CESC	556.0174	1487.98539999995	827345.773345931
0.223300970873786	CESC	808.097600000001	2834.71989999996	2290730.34786221
0.437037037037037	CESC	428.079699999999	1566.70489999997	670674.563580516
0.308510638297872	CESC	1171.6544	1422.36020000002	1666514.5867149
0.166666666666667	BRCA	314.6206	1431.83219999999	450483.905863316
0.189655172413793	BRCA	504.550900000001	1873.36760000001	945209.308610846
0.157894736842105	BRCA	845.413099999998	1444.60490000002	1221287.9067842
0.25	BRCA	807.417100000001	1019.8529	823446.670944588
0.222222222222222	BRCA	411.002100000001	1672.80710000002	687527.230994921
0.397590361445783	BRCA	515.4757	1196.79019999999	616916.266098137
0.364705882352941	BRCA	553.4741	863.348000000001	477840.7572868
0.37962962962963	BRCA	480.010700000001	1387.14190000003	665842.954418345
0.311111111111111	BRCA	572.664399999999	875.432500000002	501329.027353
0.222222222222222	BRCA	341.849099999999	828.467200000001	283210.76669952
0.111111111111111	BRCA	608.977099999999	2021.14800000001	1230832.8477108
0.15	BRCA	925.899300000001	1382.73380000002	1280272.25750636
0.0909090909090909	BRCA	959.127299999996	1003.5902	962570.758832455
0.405405405405405	BRCA	1431.83770000004	787.707399999998	1127869.15188901
0.2	BRCA	681.593900000002	1683.49149999999	1147457.53710184
0.387096774193548	BRCA	638.5948	750.240600000003	479099.745908882
0.227272727272727	BRCA	580.694999999998	784.555999999997	455587.746419997
0.3	BRCA	896.332099999998	919.258499999999	823960.901747848
0.207317073170732	BRCA	250.953	2017.36549999997	506263.924321494
0.264705882352941	BRCA	1006.9124	874.654399999999	880700.361074559
0.28	BRCA	673.924599999999	1511.94899999997	1018939.62504538
0.258064516129032	BRCA	949.274400000003	897.393100000001	851872.296566643
0.314285714285714	BRCA	1052.27209999998	1572.91360000005	1655133.09699058
0.205882352941176	BRCA	397.3607	2401.75949999995	954364.836151628
0.32	BRCA	959.109699999999	1313.9234	1260196.67799698
0.394736842105263	BRCA	967.475500000003	907.072799999998	877570.710716401
0.360824742268041	BRCA	866.950799999998	1499.52649999995	1300015.69879616
0.19047619047619	BRCA	970.384499999999	1278.01600000002	1240166.91715202
0.193877551020408	HNSC	529.145400000001	979.060599999998	518065.41281124
0.254901960784314	HNSC	881.964399999998	812.165000000001	716300.616925999
0.124333925399645	LIHC	457.8772	1889.57639999999	865193.951218074
0.114832535885167	LIHC	1624.79869999997	1378.42189999999	2239658.11117146
0.135746606334842	LIHC	621.537500000001	892.904800000002	554973.817130002
0.115107913669065	LIHC	621.658699999999	1583.27620000004	984257.424232961
0.096045197740113	LIHC	750.201199999999	1343.19350000003	1007665.37553222
0.0879345603271984	LIHC	723.608400000002	1077.54319999998	779719.310882871
0.129526462395543	LIHC	614.3661	2788.81170000007	1713351.36776341
0.105476673427992	LIHC	943.8002	710.080299999998	670173.929156059
0.153538050734312	LIHC	969.7709	1196.4213	1160254.56088017
0.147157190635452	LIHC	336.392100000001	900.7881	303018.000614011
0.0909090909090909	LIHC	342.477099999999	1107.64749999999	379343.903622246
0.0732600732600733	LIHC	494.3215	1138.40229999998	562736.732539437
0.187134502923977	LIHC	605.592999999999	784.252099999998	474937.581995298
0.257575757575758	LIHC	604.122800000001	1951.19899999996	1178763.80323718
0.107296137339056	LIHC	1007.1869	2556.46820000002	2574841.2813066
0.184931506849315	LIHC	845.1304	1554.5503	1313797.71685912
0.253164556962025	LIHC	1213.35499999998	1318.44869999996	1599746.32238842
0.21264367816092	LIHC	826.751099999999	1206.55020000004	997516.705055249
0.109988776655443	LIHC	628.327500000001	1226.51930000001	770655.805470756
0.18232044198895	LIHC	715.1676	2035.93379999993	1456033.88950483
0.241379310344828	LIHC	468.145199999999	1087.90320000004	509296.661144656
0.0880681818181818	LIHC	871.015900000001	833.665300000001	726135.731578272
0.242424242424242	LIHC	512.464299999998	576.956499999999	295669.608902948
0.201680672268908	THCA	373.857499999999	765.012299999999	286005.585947249
0.226086956521739	THCA	463.7962	846.8163	392750.18203806
0.225433526011561	THCA	553.399000000002	730.168200000001	404074.351711802
0.227544910179641	THCA	432.521499999999	825.489800000003	357042.0865307
0.325581395348837	THCA	498.871000000001	749.133000000002	373720.728843001
0.289719626168224	THCA	906.3685	882.4867	799858.146548951
0.298969072164948	THCA	406.021999999999	570.425800000001	231605.4241676
0.407303370786517	BLCA	751.542299999999	2416.71340000007	1816262.34707687
0.239263803680982	BLCA	433.3533	1072.3252	464695.664093162
0.396551724137931	BLCA	904.789600000003	1063.79680000003	962512.28115331
0.25	BLCA	1916.82119999994	1287.41720000003	2467748.58220461
0.362573099415205	BLCA	846.919399999998	1169.66819999997	990614.690143051
0.211538461538462	BLCA	1419.8473	1368.42109999997	1942949.00409799
0.222222222222222	BLCA	5244.2413000001	2553.89480000004	13393240.5860157
0.12	BLCA	1071.10090000002	928.389399999998	994398.721890475
0.344827586206897	BLCA	1552.26589999996	1361.93350000002	2114082.93011763
0.409090909090909	BLCA	1097.70600000003	717.077300000002	787140.054673825
0.461538461538462	BLCA	983.490600000004	1629.24529999997	1602347.43764416
0.394736842105263	BLCA	543.147200000001	1001.4503	543934.926384159
0.276315789473684	BLCA	1099.25419999998	1095.23809999998	1203945.08142497
0.359375	BLCA	1106.76530000002	1088.79490000002	1205040.41413701
0.244444444444444	BLCA	3510.43740000011	1979.12520000003	6947595.1213628
0.168224299065421	PRAD	709.445999999998	605.420499999997	429513.152042997
0.184210526315789	PRAD	381.289900000001	630.607599999999	240444.30874324
0.0183150183150183	PRAD	375.9936	831.081100000003	312481.174680961
0.15	PRAD	384.957800000002	859.554899999998	330892.363283221
0.18	PRAD	490.6357	724.662799999998	355545.440141959
0.333333333333333	PRAD	413.531200000001	814.290600000001	336734.568966721
0.27906976744186	PRAD	514.1008	710.1248	365075.72777984
0.28	PRAD	486.539999999999	868.566899999999	422592.539525999
0.2	PRAD	504.5256	789.808899999998	398478.809157839
0.18	PRAD	668.8907	676.396999999999	452435.662807899
0.161764705882353	PRAD	336.519599999999	715.315400000002	240717.65228184
0.194444444444444	PRAD	285.0467	1074.24710000001	306210.590839573
0.21875	PRAD	414.5712	855.899400000001	354831.24133728
0.340425531914894	PRAD	406.734600000001	912.616600000001	371192.747754361
0.213592233009709	PRAD	428.835899999999	1107.26340000001	474834.296676065
0.353846153846154	PRAD	580.618500000001	1725.22760000003	1001699.06127062
0.258064516129032	PRAD	604.842099999999	1014.5739	613657.008281188
0.292682926829268	PRAD	324.311899999999	623.286899999999	202139.358784109
0.120689655172414	PRAD	404.335199999999	751.606900000001	303901.12623288
0.142857142857143	PRAD	482.855099999999	804.408700000001	388412.84327937
0.148936170212766	PRAD	458.0601	781.152900000002	357814.975489291
0.226415094339623	PRAD	531.859100000002	629.3103	334704.409778731
0.169014084507042	PRAD	518.040799999999	497.144000000001	257540.8754752
0.217391304347826	PRAD	619.3578	990.593600000004	613531.872790082
0.25	PRAD	590.551199999999	686.4289	405371.410609679
0.107142857142857	PRAD	565.217399999999	847.430800000002	478982.63345592
0.325	PRAD	622.655099999998	809.523799999998	504054.122641377
0.307692307692308	PRAD	452.465799999999	555.006299999999	251121.369534539
0.15625	PRAD	528.7666	577.182500000001	305194.828104501
0.276595744680851	PRAD	386.379800000001	801.253699999997	309588.24435526
0.263157894736842	PRAD	621.8569	632.1568	393111.06796192
0.268292682926829	PRAD	455.500599999999	790.1731	359924.32115386
0.253521126760563	KIRC	796.4974	524.693500000002	417917.008546902
0.217948717948718	KIRC	732.496699999997	698.150599999998	511393.010603017
0.328125	KIRC	500.1658	724.378099999997	362309.151888978
0.324324324324324	KIRC	357.654200000001	734.0308	262529.198549361
0.236842105263158	KIRC	521.830600000001	638.085200000001	332972.382767121
0.242424242424242	KIRC	387.457000000001	922.2509	357332.566961301
0.265822784810127	KIRC	468.188700000001	693.633599999999	324751.41346032
0.275862068965517	KIRC	549.339099999999	899.477399999997	494118.105386338
0.276923076923077	KIRC	265.0587	747.7145	198188.23334115
0.238095238095238	KIRC	267.244	576.590000000002	154090.21796
0.246575342465753	KIRC	455.366300000001	658.239800000002	299740.222238741
0.159090909090909	KIRC	301.7063	695.396200000001	209805.41453606
0.219512195121951	KIRC	580.332200000001	729.090099999998	423114.46173122
0.181818181818182	KIRC	468.245799999999	601.098499999998	281461.848011298
0.307692307692308	KIRC	376.538699999999	630.598899999999	237444.890027429
0.197278911564626	KIRC	373.803599999999	847.833100000001	316923.06497916
0.32258064516129	KIRC	746.376800000001	680.756799999999	508101.081962239
0.213114754098361	KIRC	406.077299999999	817.3726	331916.45850198
0.247058823529412	KIRC	490.239400000001	852.301999999999	417832.0210988
0.32258064516129	KIRC	297.3098	861.7811	256215.96648478
0.316831683168317	KIRC	457.725900000002	802.721099999999	367426.237946491
0.282051282051282	KIRC	525.844799999999	690.689899999999	363195.692327518
0.214285714285714	KIRC	353.031200000001	683.094199999999	241153.56513904
0.235955056179775	KIRC	671.035699999999	708.7587	475602.39038559
0.330275229357798	HNSC	546.712800000002	1294.88660000003	707931.078768496
0.143617021276596	HNSC	843.739899999999	1518.92590000001	1281578.38697342
0.235537190082645	HNSC	420.930599999999	1114.36439999999	469070.075510635
0.225352112676056	HNSC	675.839300000001	1461.04090000003	987428.859127392
0.236947791164659	HNSC	409.070099999998	623.912000000001	255223.744231199
0.232824427480916	HNSC	458.409499999999	1183.27239999997	542423.309247787
0.300613496932515	HNSC	792.207799999998	1880.6033	1489828.60296574
0.23134328358209	HNSC	667.438599999999	958.777200000004	639924.912079922
0.269503546099291	HNSC	525.432100000001	1002.4691	526729.44439811
0.323529411764706	HNSC	603.031400000001	1112.1138	670639.541773321
0.34006734006734	HNSC	557.4581	1493.1507	832368.952235668
0.285714285714286	HNSC	463.344300000001	869.028000000003	402659.170340402
0.262857142857143	HNSC	705.563099999997	1149.25370000001	810871.003258474
0.257142857142857	HNSC	575.710399999999	586.609599999999	337717.247459839
0.208791208791209	HNSC	546.438400000002	1945.17869999994	1062920.33654205
0.316498316498317	HNSC	548.8478	1129.30869999998	619818.595515848
0.277227722772277	HNSC	598.226500000002	1962.48289999995	1174009.27657683
0.225641025641026	HNSC	571.783099999999	961.006700000001	549487.390046769
0.19047619047619	HNSC	391.995300000001	1369.43299999999	536811.299664895
0.208251473477407	HNSC	668.041900000002	1574.10350000005	1051567.09293668
0.230392156862745	HNSC	375.7447	574.042600000001	215693.464524221
0.204778156996587	HNSC	207.03	866.494700000001	179390.397741
0.206451612903226	HNSC	437.717499999999	1665.90140000004	729194.196054517
0.324786324786325	HNSC	823.192199999998	1558.64200000001	1283061.9369924
0.233128834355828	HNSC	565.034300000001	1557.45400000001	880014.930672207
0.278761061946903	HNSC	490.905700000001	1984.62400000002	974263.233956811
0.262135922330097	HNSC	1073.53780000001	939.003500000003	1008055.75158231
0.214912280701754	HNSC	588.8613	2100.03549999998	1236629.63457614
0.178899082568807	HNSC	715.754100000002	1949.21390000001	1395157.840702
0.288718929254302	HNSC	593.7238	727.615100000001	432002.40210938
0.27906976744186	HNSC	322.959200000001	1138.82489999997	367793.978644071
0.290102389078498	HNSC	434.387000000001	837.6437	363861.533911901
0.309210526315789	HNSC	555.1741	1508.58259999999	837525.987230652
0.135483870967742	HNSC	578.542200000001	1452.81760000002	840516.290502731
0.359026369168357	HNSC	420.544799999999	517.026100000002	217432.63781928
0.25	HNSC	757.522099999997	2136.16520000006	1618192.34825096
0.395424836601307	HNSC	474.994300000002	723.452800000001	343635.956319042
0.263157894736842	HNSC	438.016499999998	685.950400000001	300457.593381599
0.227272727272727	HNSC	362.870700000001	780.546900000002	283237.599985831
0.244791666666667	HNSC	708.313200000001	1590.21940000002	1126373.3919161
0.227678571428571	HNSC	431.691900000002	553.917899999998	239121.87069501
0.252100840336134	HNSC	454.226899999999	677.179200000002	307593.00876048
0.253041362530414	HNSC	708.235299999999	1431.52940000001	1013859.65406783
0.302469135802469	HNSC	512.963000000001	1166.29629999997	598266.848936883
0.263157894736842	HNSC	914.424100000003	1609.24159999995	1471529.30176252
0.241379310344828	HNSC	352.1188	1067.21079999997	375784.986243029
0.243119266055046	HNSC	904.127000000002	983.174600000002	888914.701574204
0.278947368421053	HNSC	313.908599999999	1085.31869999997	340690.873670809
0.197647058823529	HNSC	579.802700000001	1447.47529999999	839250.087123303
0.242574257425743	HNSC	807.672400000002	996.3712	804741.518394882
0.222222222222222	HNSC	715.7066	1366.34889999998	977904.925632722
0.306451612903226	HNSC	311.334899999999	1276.98340000004	397569.499140672
0.231075697211155	HNSC	634.215799999999	1698.54819999995	1077246.10550152
0.251461988304094	HNSC	277.6249	1046.24120000004	290462.60852589
0.191304347826087	HNSC	485.207099999999	1674.55620000001	812506.557589025
0.324786324786325	HNSC	528.544199999999	945.290199999996	499627.652526837
0.3	HNSC	613.828	1119.30860000001	687062.959320805
0.296610169491525	HNSC	713.641099999998	1182.45980000003	843851.912377796
0.330188679245283	HNSC	851.777999999997	847.198599999998	721625.129110796
0.32258064516129	HNSC	816.577499999998	1898.21249999995	1550037.6177187
0.221343873517787	HNSC	935.875199999998	1227.03640000002	1148352.9362573
0.181132075471698	HNSC	694.395800000001	1249.56220000003	867690.743518783
0.25	HNSC	721.256300000001	996.074000000002	718424.647766203
0.169154228855721	HNSC	736.928799999998	1043.22769999997	768784.537087736
0.220264317180617	HNSC	953.124999999998	2390.62499999993	2278564.45312493
0.255813953488372	HNSC	796.285499999998	1398.95530000004	1113967.82053818
0.348837209302326	HNSC	964.718899999997	1927.7839	1859769.56344571
0.593406593406593	HNSC	915.7876	1241.90899999996	1137324.86252837
0.182572614107884	HNSC	517.818700000001	1264.9892	655035.063058041
0.253333333333333	HNSC	797.0621	2139.54970000005	1705353.97693641
0.277777777777778	HNSC	513.1849	3101.62050000009	1591704.8061305
0.223776223776224	HNSC	600.1613	2233.96699999994	1340740.53887706
0.284615384615385	HNSC	399.836600000001	925.507299999999	370051.69210718
0.245283018867925	HNSC	591.851399999999	1310.23090000003	775461.992488277
0.307471264367816	HNSC	513.6474	1886.84340000003	969172.206617176
0.40948275862069	HNSC	698.305899999999	968.400800000002	676239.99220472
0.24822695035461	HNSC	652.597400000003	1997.83550000006	1303782.25292775
0.279503105590062	HNSC	557.005099999998	1509.92630000004	841036.649724152
0.293478260869565	HNSC	542.8087	844.023700000001	458143.40736619
0.224899598393574	HNSC	431.934499999999	1312.69190000003	566996.91948056
0.328703703703704	HNSC	792.515099999998	944.1693	748268.427206428
0.251700680272109	HNSC	547.185899999998	1151.449	630056.657369097
0.266666666666667	HNSC	542.5307	1136.6906	616689.546901418
0.269230769230769	HNSC	651.704399999998	1570.85169999995	1023730.96463745
0.243781094527363	HNSC	842.755499999999	1325.63449999997	1117185.76586472
0.242718446601942	HNSC	596.921499999999	889.220800000002	530795.013767201
0.174603174603175	HNSC	545.034599999999	918.925499999998	500846.192322298
0.244565217391304	HNSC	770.367699999998	930.7859	717047.392975428
0.253164556962025	HNSC	625.4203	834.230000000001	521744.376869001
0.216326530612245	HNSC	855.501700000002	1363.48950000001	1166467.58518217
0.236641221374046	HNSC	510.889500000001	984.124500000003	502778.873742753
0.28436018957346	HNSC	484.228500000001	1876.55579999996	908681.80020028
0.234234234234234	HNSC	389.46	1363.62849999998	531078.755609993
0.345323741007194	HNSC	541.844299999999	856.856500000002	464282.81044295
0.218181818181818	HNSC	793.150700000002	1395.89040000004	1107151.44788331
0.292682926829268	HNSC	740.020800000001	724.748399999998	536328.89076672
0.283236994219653	HNSC	758.306599999997	709.731799999999	538194.308169877
0.333333333333333	HNSC	512.362000000001	527.316799999999	270177.0902816
0.363449691991786	HNSC	474.782600000002	882.318799999999	418909.613892881
0.272727272727273	HNSC	488.425900000001	941.666700000002	459934.405447532
0.369369369369369	HNSC	483.231	1238.0727	598275.108893697
0.34375	HNSC	510.5465	1176.8936	600858.908352398
0.287234042553192	HNSC	732.785200000001	1515.41619999997	1110474.56320022
0.222222222222222	HNSC	825.120200000002	1048.67789999997	865285.318583553
0.322222222222222	HNSC	646.937999999998	1233.48229999999	797986.572197391
0.23943661971831	HNSC	861.069000000001	1508.55560000002	1298970.46193642
0.257142857142857	HNSC	690.028500000001	1168.661	806409.396838504
0.226666666666667	HNSC	467.285899999999	1158.31989999998	541266.556959399
0.166666666666667	HNSC	698.296800000001	1040.5515	726613.782685203
0.223300970873786	HNSC	830.979900000001	1737.69789999998	1443992.0271722
0.211155378486056	HNSC	538.4874	2022.85710000002	1089283.06035055
0.261363636363636	HNSC	711.064500000002	1453.06759999995	1033224.78646017
0.315010570824524	HNSC	622.8627	2603.81050000004	1621816.43831837
0.239766081871345	HNSC	579.6131	1470.2381	852169.262879109
0.24822695035461	HNSC	561.369699999999	2222.00710000005	1247367.45912489
0.289308176100629	HNSC	737.601800000001	5347.81170000016	3944555.53598118
0.297101449275362	HNSC	391.5788	2107.87629999996	825399.672102424
0.2578125	HNSC	473.8281	969.5312	459391.12638672
0.319467554076539	HNSC	817.817800000002	2795.79580000003	2286451.57040527
0.287128712871287	HNSC	450.738399999999	2005.26090000007	903848.089648589
0.206896551724138	HNSC	414.497499999999	845.798999999999	350581.571002499
0.271739130434783	HNSC	532.369800000001	870.420600000002	463385.640737881
0.413934426229508	HNSC	701.915000000002	638.132300000002	447914.633354503
0.385185185185185	HNSC	816.292900000002	1874.99999999999	1530549.1875
0.460567823343849	HNSC	571.605199999999	1860.3153	1063365.89911956
0.251497005988024	HNSC	361.817299999999	1906.68710000006	689872.378466851
0.290023201856148	HNSC	484.955800000001	736.725700000002	357279.401224062
0.26865671641791	HNSC	464.273100000002	2626.54000000005	1219431.86807403
0.259887005649718	HNSC	360.853499999999	875.123799999996	315791.486163298
0.285123966942149	HNSC	692.6912	1328.46890000002	920218.716503692
0.278688524590164	HNSC	570.17	929.962099999999	530236.490556999
0.282485875706215	HNSC	474.413199999999	1234.32089999998	585578.127995871
0.244367417677643	HNSC	655.764900000002	1061.99850000003	696421.340152674
0.273381294964029	HNSC	612.452799999999	1553.9623	951728.561729438
0.266447368421053	HNSC	350.4838	980.137800000001	343522.42066764
0.311178247734139	HNSC	644.202499999999	1667.45140000003	1074176.36050852
0.245398773006135	HNSC	560.706	1572.44450000004	881679.065817022
0.254261363636364	HNSC	590.101900000001	1150.21829999999	678746.004244765
0.23021582733813	HNSC	584.9929	1710.88190000001	1000853.76423851
0.174496644295302	HNSC	518.622500000001	2033.89829999996	1054825.42109173
0.306451612903226	HNSC	453.231400000001	1320.52599999999	598503.847716395
0.273946360153257	HNSC	569.657	1547.7548	881689.356103602
0.203947368421053	HNSC	385.219099999999	786.461700000001	302960.06825847
0.313084112149533	HNSC	305.2623	1264.10789999996	385884.485002159
0.235294117647059	HNSC	486.655499999999	964.513500000001	469385.799599249
0.238993710691824	HNSC	424.423499999999	1034.93660000001	439251.414050104
0.282296650717703	HNSC	393.829699999999	639.383	251808.015075099
0.283185840707965	HNSC	536.8982	1004.426	539274.511433199
0.297872340425532	HNSC	670.196399999998	1492.74119999998	1000429.77837167
0.346666666666667	HNSC	484.883200000001	903.2813	437985.927244161
0.232164449818622	HNSC	502.1364	1024.90049999997	514639.847428183
0.205128205128205	HNSC	365.577900000001	798.576199999998	291941.81018598
0.2882096069869	HNSC	342.769699999999	1241.00989999996	425380.591120016
0.177215189873418	HNSC	407.2956	871.119700000002	354803.220883321
0.256	HNSC	507.965800000001	1018.388	517306.275130402
0.218390804597701	HNSC	301.4299	922.820300000003	278165.630746971
0.369565217391304	HNSC	377.8817	737.062700000001	278522.506082591
0.376923076923077	HNSC	387.725600000002	635.379099999998	246352.74277496
0.231404958677686	HNSC	442.678799999999	805.902399999999	356755.907349119
0.230434782608696	HNSC	855.031899999998	1975.63900000002	1689234.36788411
0.237597911227154	HNSC	552.337899999999	1795.0252	991460.449415076
0.292993630573248	HNSC	382.864399999999	1026.86190000003	393148.865226369
0.172607879924953	HNSC	444.810499999999	4481.05440000006	1993220.04819122
0.280898876404494	HNSC	568.082900000002	1999.52530000004	1135896.1310474
0.125	LGG	524.858399999999	812.2509	426316.70777256
0.333333333333333	LGG	250.172499999999	1094.20290000004	273739.475000259
0.222222222222222	LGG	658.131499999998	774.7405	509881.127375749
0.1875	LGG	543.565999999999	1331.03559999996	723505.696949575
0.103448275862069	LGG	588.072100000001	1278.02289999999	751569.610651085
0.354166666666667	LGG	611.958000000001	822.638099999999	503419.9663998
0.210526315789474	LGG	483.356899999999	541.053100000001	261521.74915139
0.285714285714286	LGG	583.472700000001	623.285399999998	363670.01520858
0.214285714285714	LGG	546.8689	1043.75319999997	570796.164355466
0.257142857142857	LGG	525.500400000002	539.305199999999	283405.098322081
0.181818181818182	LGG	471.1022	1282.2581	604074.611877818
0.296296296296296	LGG	603.838999999999	1255.23220000004	757958.156415823
0.24	LGG	507.052399999998	779.0235	395005.735331399
0.285714285714286	LGG	412.104000000001	774.2038	319052.482795201
0.258823529411765	LGG	495.509200000001	597.525799999999	296079.53113736
0.147540983606557	LGG	526.522599999999	957.915399999998	504364.106988038
0.24	LGG	520.598900000001	727.2083	378583.84105087
0.382352941176471	LGG	657.520200000001	579.803999999999	381232.8420408
0	LGG	561.2198	608.102000000002	341278.882819601
0.285714285714286	LGG	667.794100000002	721.533299999999	481835.680693531
0.325301204819277	BLCA	583.8409	874.078799999997	510322.953262918
0.356521739130435	BLCA	516.1804	1758.09019999998	907491.70267207
0.25609756097561	BLCA	846.534699999999	2395.48950000002	2027864.98523567
0.380228136882129	BLCA	616.312500000002	1016.6211	626556.291693753
0.392156862745098	BLCA	1136.50090000002	1199.74570000003	1363512.0678212
0.351694915254237	BLCA	797.674400000003	1152.55809999996	919366.090882614
0.445833333333333	BLCA	1125.15919999998	1868.19810000003	2102020.27963752
0.366336633663366	BLCA	1188.65599999998	1258.93960000004	1496446.10917763
0.258064516129032	HNSC	383.476799999999	1265.0212	485106.281708158
0.27683615819209	HNSC	647.654599999999	1272.38810000002	824068.00595027
0.205882352941176	HNSC	884.977999999997	1626.02140000001	1438993.16652921
0.242647058823529	HNSC	719.1922	1633.4066	1174733.28614852
0.212927756653992	HNSC	351.8604	1556.27009999997	547589.819894028
0.257372654155496	HNSC	538.306499999999	1128.5282	607494.065493302
0.269938650306748	HNSC	611.249599999999	1299.66400000001	794419.100134403
0.260330578512397	HNSC	469.088899999999	1350.86769999999	633677.043438524
0.233521657250471	HNSC	437.0023	1629.50819999996	712098.831268844
0.354460093896714	HNSC	756.940800000001	1020.4295	772404.722073601
0.265895953757225	HNSC	700.433200000002	1810.24119999997	1267953.03648782
0.337301587301587	HNSC	628.000000000001	662.499999999998	416050
0.257028112449799	HNSC	857.886900000001	1439.73210000004	1235127.30809953
0.290657439446367	HNSC	495.0296	940.254399999999	465453.759530239
0.236559139784946	HNSC	437.020300000001	1269.88709999997	554966.441408117
0.284810126582278	HNSC	1364.05840000003	580.901899999998	792384.116270975
0.313953488372093	HNSC	422.624699999998	1356.79340000003	573414.403636991
0.283653846153846	HNSC	474.066999999999	1597.23379999998	757195.835864589
0.225694444444444	HNSC	602.7479	1014.3369	611389.436367511
0.168067226890756	HNSC	586.0113	1253.78069999999	734729.657921905
0.278538812785388	HNSC	932.759899999997	1193.67729999996	1113414.31898023
0.253521126760563	HNSC	485.257200000002	1677.27530000003	813909.915707179
0.281609195402299	HNSC	1231.0712	1282.10879999999	1578367.21894656
0.284057971014493	HNSC	833.206599999999	1216.99450000001	1014007.84956371
0.231372549019608	HNSC	696.3237	1287.76980000001	896704.63188427
0.229166666666667	HNSC	314.246199999999	671.645899999999	211062.171820579
0.242744063324538	HNSC	491.049599999999	739.6257	363192.904134719
0.294416243654822	HNSC	994.878900000002	1291.4469	1284833.27128041
0.264	HNSC	518.9955	1306.50349999998	678069.437234237
0.217228464419476	HNSC	458.024399999998	904.051300000001	414077.554251719
0.251572327044025	HNSC	524.406299999999	1499.67020000004	786436.500802281
0.318518518518519	HNSC	596.403199999997	1608.53199999995	959333.632102366
0.298701298701299	HNSC	444.532900000001	1389.71249999995	617772.927791231
0.246105919003115	HNSC	403.663399999999	1356.14310000002	547425.334632549
0.242718446601942	HNSC	521.216000000001	940.4687	490187.333939201
0.244725738396624	HNSC	731.421100000001	953.933099999999	697726.79732841
0.309608540925267	HNSC	565.193299999999	1454.57419999999	822115.592192851
0.177215189873418	HNSC	426.748100000002	1701.99780000005	726324.327354206
0.255060728744939	HNSC	589.644799999999	1121.95120000003	661552.690933774
0.268987341772152	HNSC	480.616500000001	1126.27159999998	541304.714441391
0.265060240963855	HNSC	456.553299999999	589.392199999999	269088.953904259
0.213592233009709	HNSC	665.204300000001	1185.97580000002	788916.201855952
0.237154150197628	HNSC	608.6712	911.599099999999	554864.118115919
0.27639751552795	HNSC	661.831400000002	902.991799999997	597628.327182519
0.21195652173913	HNSC	640.615100000002	1224.0846	784167.07843746
0.26791277258567	HNSC	355.927799999999	2123.70230000006	755884.68749396
0.40620957309185	HNSC	623.2043	1947.04210000003	1213405.00900105
0.232198142414861	HNSC	600.845700000001	2297.25159999998	1380293.74567811
0.286195286195286	HNSC	805.252499999999	1220.20199999999	982570.71100499
0.197368421052632	HNSC	298.279999999999	879.602900000001	262367.953011999
0.270161290322581	HNSC	564.503800000001	774.427500000002	437167.266574502
0.278089887640449	HNSC	649.911499999999	1151.01630000004	748058.730057475
0.231884057971014	HNSC	592.214700000001	1143.99090000003	677488.227646246
0.345945945945946	HNSC	473.378299999999	1348.42400000004	638314.660799216
0.225	HNSC	547.9905	2635.93380000005	1444466.68102893
0.294303797468354	HNSC	385.4167	964.583299999999	371766.512361109
0.242009132420091	HNSC	564.221800000001	1654.6234	933574.593070124
0.228070175438596	HNSC	630.494499999999	974.5879	614472.310716549
0.215789473684211	HNSC	475.615200000001	1087.24829999999	517111.817654155
0.240384615384615	HNSC	679.858699999999	1260.77739999996	857150.484153352
0.264462809917355	HNSC	514.1201	1225.34159999996	629972.745926138
0.188405797101449	HNSC	699.771700000001	1470.31959999996	1028888.04603529
0.215189873417722	HNSC	384.389699999999	836.267600000002	321452.651883719
0.205426356589147	HNSC	467.414699999999	1208.65920000002	564945.077370247
0.309352517985612	HNSC	561.615999999999	1245.36980000001	699419.605596804
0.271844660194175	HNSC	592.292100000002	1318.05270000004	780672.201593698
0.21654501216545	HNSC	655.518	1944.71449999996	1274795.35961097
0.267857142857143	HNSC	712.570100000001	1311.84950000002	934784.729399968
0.1850699844479	HNSC	768.350400000001	2005.52490000005	1540945.859125
0.23265306122449	HNSC	701.283200000001	1947.14030000006	1365496.780433
0.2275	HNSC	621.903600000001	1620.07169999995	1007528.42248809
0.291666666666667	HNSC	475.546500000002	1023.2139	486585.788896353
0.360433604336043	HNSC	603.3312	870.977500000001	525487.900248001
0.258620689655172	HNSC	548.023000000001	1228.63230000001	673318.758942905
0.200564971751412	HNSC	534.678300000001	1097.15180000002	586623.25926595
0.221698113207547	HNSC	518.892399999999	527.622400000001	273779.25342976
0.248847926267281	HNSC	459.8386	1398.88269999996	643260.262332201
0.296610169491525	HNSC	580.5361	1520.08369999997	882463.462871555
0.364485981308411	HNSC	632.260200000001	2613.01029999997	1652102.41488004
0.293838862559242	HNSC	816.0622	964.100700000001	786766.138263541
0.190625	HNSC	411.064199999999	1509.25800000002	620401.932363608
0.369565217391304	HNSC	467.780400000001	932.505999999999	436208.0296824
0.330472103004292	HNSC	459.0861	685.440999999999	314676.435470099
0.336898395721925	HNSC	631.532700000002	798.858099999999	504505.012809871
0.244274809160305	HNSC	798.197399999998	1498.33259999995	1195965.1856552
0.284810126582278	HNSC	553.798700000001	1192.05550000002	660158.786227863
0.283236994219653	HNSC	590.986099999998	781.768900000001	462014.553312289
0.236666666666667	HNSC	470.962600000001	1993.23790000007	938740.503802575
0.263157894736842	HNSC	521.380299999999	1441.11029999999	751366.52054708
0.221719457013575	HNSC	658.693400000001	1973.47650000005	1299915.94560513
0.308823529411765	HNSC	569.185100000002	870.118800000001	495258.656189883
0.331632653061224	HNSC	737.886499999998	1056.76049999999	779769.306683242
0.290598290598291	HNSC	594.966800000001	839.031300000001	499195.767660841
0.397058823529412	HNSC	357.449	1005.3254	359352.5589046
0.287179487179487	HNSC	957.410599999999	1237.81939999997	1185101.41444561
0.29126213592233	HNSC	779.448400000001	1524.18590000003	1188024.26105758
0.268965517241379	HNSC	730.2809	1168.91109999997	853633.450127966
0.270491803278689	HNSC	414.539800000001	902.938900000002	374304.111018222
0.228070175438596	HNSC	392.8917	1440.9882	566152.303577942
0.235807860262009	HNSC	399.235199999999	889.101299999999	354960.535325759
0.258503401360544	HNSC	980.556800000002	1296.951	1271734.12231681
0.254098360655738	HNSC	492.957699999999	1526.84859999997	752671.774104206
0.194767441860465	HNSC	512.204599999999	2425.02910000005	1242111.06015389
0.280821917808219	HNSC	439.3835	2000.75099999998	879096.97700849
0.800759013282732	HNSC	487.600699999999	1460.32239999998	712054.224465668
0.459627329192547	HNSC	531.883	528.132000000001	280904.432556
0.31055900621118	HNSC	445.5888	1005.0142	447823.071360959
0.337837837837838	HNSC	1069.25570000003	327.9396	350651.286555729
0.255555555555556	HNSC	638.5948	1804.61979999997	1152420.82025702
0.461538461538462	HNSC	630.160500000002	1146.63729999996	722565.534286628
0.370535714285714	HNSC	637.125199999999	1238.97710000001	789383.532632928
0.323232323232323	HNSC	620.370400000001	725.694399999999	450199.325205761
0.210355987055016	HNSC	641.6319	1779.01410000005	1141472.19710982
0.265486725663717	HNSC	672.471900000001	795.505600000002	534955.162292643
0.222222222222222	HNSC	332.965799999999	1348.95259999998	449155.081621073
0.186968838526912	HNSC	740.328799999998	1896.03479999995	1403689.1682422
0.242424242424242	HNSC	746.940799999999	1412.13899999995	1054784.23437116
0.216354344122658	HNSC	582.849999999998	1500.82849999995	874757.891224968
0.42152466367713	HNSC	579.3872	464.623999999999	269197.198412799
0.428571428571429	HNSC	678.438700000002	1346.65430000002	913622.392641425
0.228571428571429	HNSC	865.9103	1648.27230000002	1427255.9617747
0.796581196581197	HNSC	475.2314	1019.0528	484285.888817919
0.283950617283951	HNSC	537.855600000001	945.295400000002	508432.424544242
0.280575539568345	HNSC	1358.41779999996	699.790999999998	950608.550679769
0.493710691823899	HNSC	1251.20770000001	413.3885	517234.874291456
0.175	HNSC	1295.99999999998	1225.33329999996	1588031.95679992
0.157142857142857	HNSC	586.989399999998	756.429700000002	444016.21574518
0.375	HNSC	1199.57540000001	719.037499999999	862539.696677509
0.225563909774436	HNSC	1085.36929999997	936.406700000001	1016347.08449429
0.247191011235955	HNSC	519.669399999999	913.057900000001	474488.25105826
0.271186440677966	HNSC	730.660700000001	1492.09329999999	1090213.9350433
0.178571428571429	HNSC	424.9943	1181.54440000001	502149.635196923
0.283813747228381	HNSC	1470.31200000003	987.251399999998	1451567.58043682
0.459785522788204	HNSC	811.354199999998	422.8267	343062.218917139
0.381818181818182	KIRC	415.433500000001	974.119900000001	404682.039476651
0.174418604651163	KIRC	507.7623	1032.92289999998	524479.307426661
0.34375	KIRC	394.8844	951.646800000001	375790.47562992
0.283333333333333	KIRC	316.077200000001	657.556300000001	207838.554146361
0.241379310344828	KIRC	354.809699999999	840.275699999997	298137.969034288
0.227979274611399	HNSC	610.4153	1456.49310000005	889065.672584459
0.279352226720648	HNSC	288.5503	521.237299999999	150403.17928619
0.363905325443787	HNSC	734.255599999999	1242.44630000001	912273.153474289
0.277272727272727	HNSC	469.001000000001	710.8898	333408.027089801
0.333333333333333	HNSC	1050.4246	1393.84290000003	1464126.87069537
0.23469387755102	KIRC	461.753200000001	910.664400000001	420502.200826082
0.301369863013699	KIRC	548.396499999999	1455.102	797972.843942999
0.238938053097345	KIRC	424.615400000001	1024.87180000004	435176.349305736
0.189655172413793	KIRC	332.1883	501.889400000001	166721.78657402
0.318181818181818	KIRC	588.0314	1024.51510000001	602447.048574144
0.315789473684211	KIRC	591.723799999999	632.691799999998	374378.796124838
0.339622641509434	KIRC	306.089699999999	698.7179	213870.352395629
0.25531914893617	KIRC	588.881299999999	1288.26359999999	758634.343510674
0.326923076923077	KIRC	436.041799999999	840.576099999997	366526.315680978
0.297872340425532	KIRC	212.6745	711.0634	151225.0530633
0.181818181818182	SKCM	1081.16159999997	1472.82199999996	1592358.59003512
0.241379310344828	HNSC	630.0716	1429.99200000003	900997.34742722
0.75163970266725	HNSC	912.438100000002	1293.58840000002	1180319.34187806
0.286666666666667	HNSC	444.185100000001	1330.56049999997	591015.148748538
0.198924731182796	HNSC	540.666899999998	2402.20009999994	1298790.08124665
0.202898550724638	HNSC	455.731699999999	987.477000000002	450024.5719209
0.246753246753247	HNSC	468.824	1220.99450000004	572431.525468017
0.21608040201005	HNSC	653.523799999998	1304.25330000005	852360.572778567
0.0588235294117647	HNSC	1068.37240000002	2103.89830000001	2247746.87612697
0.327102803738318	HNSC	358.4535	1150.0655	412245.00370425
0.237704918032787	HNSC	530.011999999998	1158.46339999997	613999.503560782
0.229885057471264	HNSC	507.095600000002	1678.33490000005	851076.243116469
0.267015706806283	HNSC	702.912599999999	1229.94430000002	864543.345768192
0.326666666666667	HNSC	961.183000000002	774.4917	744428.255681102
0.359550561797753	HNSC	1446.87400000003	1121.03479999997	1621996.10521519
0.273684210526316	HNSC	1046.77019999999	1074.77529999997	1125042.75573601
0.344827586206897	HNSC	622.2086	1496.43160000004	931092.610831784
0.21875	HNSC	1109.85529999998	465.334300000001	516453.73912678
0.389473684210526	HNSC	1141.50259999997	981.035699999999	1119854.80224279
0.320388349514563	HNSC	2084.72739999995	351.075400000001	731896.505845945
0.268018018018018	HNSC	833.4835	1598.47800000002	1332305.03811302
0.317647058823529	BRCA	831.952200000001	1366.02250000002	1136465.42412452
0.157894736842105	BRCA	428.8799	1621.32249999997	695352.631667738
0.382352941176471	BRCA	361.067499999999	404.238600000001	145957.4207055
0.2	BRCA	528.931200000001	625.595600000001	330897.031422721
0.272727272727273	BRCA	350.331999999999	785.126200000002	275054.8318984
0.25	BRCA	400.6109	1614.54909999996	646805.968045175
0.1875	BRCA	545.601300000001	868.845800000001	474043.397979541
0.428571428571429	BRCA	562.8337	603.061600000002	339423.391655921
0.25	BRCA	273.7089	1892.14660000006	517897.364524757
0.164772727272727	SKCM	590.733600000002	887.644799999999	524361.608225281
0.0454545454545455	SKCM	902.430899999997	1089.91009999997	983568.552462061
0.119741100323625	SKCM	315.298899999999	948.044400000001	298917.356471159
0.156626506024096	SKCM	567.615699999999	790.925299999999	448941.617807209
0.111111111111111	LGG	514.490300000002	632.458200000002	325393.609055462
0.3	LGG	612.5155	895.565699999998	548547.872518349
0.259259259259259	LGG	827.011499999999	1010.3448	835566.768565199
0.215686274509804	LGG	395.2345	795.467799999999	314396.3181991
0	LGG	462.320900000001	511.8816	236653.56200544
0.222222222222222	LGG	355.2124	498.771499999999	177169.821566599
0.2	LGG	590.687200000002	654.218600000001	386438.553021922
0.269230769230769	LGG	458.6211	561.663600000001	257590.778061961
0.344827586206897	LGG	454.7767	875.866299999997	398323.585555208
0.309090909090909	LGG	484.323199999999	699.086999999998	338584.052918399
0.305555555555556	LGG	423.578499999999	665.623399999998	281943.761336899
0.3125	LGG	680.839300000002	509.663199999998	346998.73632376
0.166666666666667	LGG	599.652	669.2545	401319.799434
0.0625	LGG	421.187000000001	790.682799999999	333025.3164836
0.351351351351351	LGG	410.1338	797.801099999998	327205.196787179
0.333333333333333	LGG	483.8944	815.028199999998	394387.581822079
0.342857142857143	LGG	412.8114	703.202800000001	290290.13235192
0.2	LGG	570.861900000002	811.034999999998	462988.981066501
0.173076923076923	LGG	475.2311	708.155100000001	336537.327143611
0.209302325581395	LGG	586.579	804.225800000001	471741.9655382
0.0625	LGG	700.908099999998	1625.02200000001	1138991.08247821
0.166666666666667	LGG	580.8762	622.999199999999	361885.40789904
0.318181818181818	LGG	693.725100000001	647.777599999999	449379.580337759
0.227272727272727	LGG	640.019399999998	609.496100000001	390089.328224339
0.142857142857143	LGG	502.949900000002	638.151399999998	320958.18281486
0.25	LGG	565.7844	581.894899999998	329227.056859559
0.424242424242424	LGG	699.6871	577.101499999998	403790.474940649
0.2	LGG	657.193600000002	927.6199	609625.861512641
0.21978021978022	LGG	587.063400000002	787.290400000003	462189.379011363
0.151515151515152	LGG	763.647400000001	542.488200000001	414269.703460681
0.181818181818182	LGG	538.2007	819.469400000001	441039.004708581
0.0909090909090909	LGG	511.348500000001	827.770400000003	423279.152384402
0.210526315789474	LGG	406.451599999999	680.3519	276530.11831804
0.666666666666667	LGG	456.229699999998	953.219099999997	434886.864027267
0.148296593186373	LIHC	384.285700000001	1514.76190000004	582101.337074846
0.095679012345679	LIHC	470.4154	1817.25090000006	854862.809023888
0.161048689138577	LIHC	735.893400000002	1006.2696	740507.157260644
0.170046801872075	LIHC	916.560999999998	1197.52669999996	1097606.26967866
0.0914512922465209	LIHC	911.4031	991.521800000002	903676.042237581
0.0946601941747573	LIHC	1004.3867	1271.80210000002	1277381.11427209
0.15036496350365	LIHC	676.6829	948.713600000001	641978.27011744
0.121212121212121	LIHC	489.667000000001	1658.96279999994	812339.337387574
0.21259842519685	LIHC	884.100900000001	1260.56589999999	1114467.4466993
0.169230769230769	LIHC	395.061699999999	519.640899999999	205290.217343529
0.151785714285714	LIHC	493.174099999998	878.839600000002	433420.928774359
0.166311300639659	LIHC	393.585599999999	542.425700000001	213490.94458992
0.129411764705882	LIHC	530.260500000001	801.202399999999	424845.9852252
0.111111111111111	LIHC	440.094899999999	933.570599999999	410859.659849938
0.18595825426945	LIHC	674.708800000001	2251.24790000002	1518936.76911153
0.134387351778656	LIHC	606.526899999998	844.273500000002	512074.588707149
0.118589743589744	LIHC	682.020199999999	1469.49490000002	1002225.20559699
0.0662824207492795	LIHC	493.6966	1480.27649999996	730807.47510988
0.132780082987552	LIHC	974.7134	1854.45969999994	1807566.71934992
0.0922330097087379	LIHC	568.200800000001	915.481200000001	520177.150224961
0.111510791366906	LIHC	911.604099999997	850.511900000001	775330.135138788
0.0987654320987654	LIHC	1360.96070000002	609.371299999999	829330.391007922
0.161111111111111	LIHC	771.134599999998	1048.4568	808501.315085278
0.13265306122449	LIHC	592.636600000002	873.515400000002	517677.196703642
0.125435540069686	LIHC	876.058799999998	1384.30669999998	1212734.06643394
0.152263374485597	LIHC	1416.74089999997	432.769399999999	613122.109248444
0.127490039840637	LIHC	714.8067	919.037200000003	656933.948109242
0.151658767772512	LIHC	734.820600000002	709.990300000003	521715.498240184
0.162162162162162	LIHC	1026.3713	760.548499999999	780605.152658048
0.0445859872611465	LIHC	816.8404	987.605700000001	806716.235030281
0.114457831325301	LIHC	837.856799999998	454.6452	380927.572407359
0.0866141732283465	LIHC	1424.2958	1095.95070000004	1560957.97901712
0.152466367713004	LIHC	2792.61670000005	921.8241	2574301.37612251
0.170542635658915	LIHC	961.400999999996	3080.05720000005	2961170.07213724
0.287640449438202	LIHC	1233.9986	576.737800000002	711693.637767082
0.238095238095238	LIHC	628.7039	474.5258	298336.22111062
0.28125	LIHC	661.372299999999	1019.695	674398.027448501
0.238805970149254	LIHC	586.782000000001	1164.91660000004	683552.092381222
0.34375	LIHC	521.4866	1323.46110000001	690167.229271265
0.303448275862069	LIHC	320.512800000001	2061.7716	660824.188476481
0.310344827586207	LIHC	467.700300000001	1299.74160000004	607889.536242498
0.321428571428571	LIHC	1111.34599999998	1616.65029999998	1796657.84430374
0.21608040201005	LIHC	559.2105	742.2249	415059.95744145
[truncated: 2,564 more rows]
