# Supplementary material for: Non-coding cancer driver candidates identified with a sample- and position-specific model of the somatic mutation rate
Source: eLife journal article supplement (doi:10.7554/elife.21778), 2017-03-31
Supplement: supp [file elife-21778-supp-v2.zip › elife_poa_e21778_Figure_7_source_data_1.txt]

STK11_mutation_status	stk11_expression
1	321.6374
1	515.408
1	364.819
1	381.0501
1	612.9032
1	860.516099999999
1	285.6034
1	351.5498
1	610.2399
0	466.9902
0	738.4155
0	246.0184
0	490.6015
0	627.2871
0	1120.0287
0	727.6465
0	1649.13
0	639.2734
0	752.0128
0	853.211
0	1033.8118
0	605.4714
0	1074.3736
0	764.7943
0	239.777
0	898.4002
0	1067.7966
0	1005.4504
0	1044.2875
0	1368.5069
0	732.9577
0	939.759
0	757.2545
0	337.8568
0	1493.0395
0	851.0671
0	216.0772
0	855.4595
0	484.7626
0	802.6756
0	432.5267
0	975.2098
0	297.8723
0	589.724
0	664.4781
0	717.6056
0	900.223
0	1918.5375
0	1120.3772
0	1025.3909
0	765.8609
0	881.7432
0	994.2463
0	592.0844
0	1100.7155
0	602.8967
0	805.1282
0	905.9031
0	551.5105
0	947.3684
0	395.843
0	910.387
0	929.8913
0	822.8152
0	469.4948
0	802.6249
0	833.5015
0	403.7356
0	927.4066
0	501.9036
0	424.6341
0	691.4005
0	495.2663
0	735.6737
0	903.537
0	2020.4708
0	236.9284
0	810.8352
0	848.6987
0	1512.7406
0	1064.9254
0	1039.0561
0	1200
0	1048.2333
0	1070.4064
0	929.4885
0	819.9419
0	562.8062
0	607.8005
0	396.081
0	996.2179
0	387.7395
0	253.2914
0	1193.8131
0	650.7027
0	609.5238
0	333.0325
0	753.0055
0	422.8635
0	947.4644
0	938.5382
0	712.3711
0	1102.707
0	811.3148
0	631.1971
0	1640.678
0	869.6117
0	292.6369
0	539.4737
0	978.9861
0	1078.2418
0	751.9764
0	997.9861
0	610.1249
0	200.4444
0	1255.0579
0	1134.4247
0	349.2792
0	970.948
0	891.9419
0	460.9665
0	852.6932
0	462.5949
0	666.302
0	781.1448
0	324.7438
0	899.139
0	666.1157
0	805.9534
0	1093.4349
0	357.083
0	567.7419
0	731.1144
0	1090.3569
0	1025.4364
0	751.7365
0	617.4559
0	899.1193
0	429.1452
0	848.9245
0	387.3817
0	804.8462
0	886.7562
0	1120.2488
0	655.8236
0	641.1668
0	599.9404
0	764.4676
0	246.043
0	858.5845
0	610.1253
0	1344.8622
0	833.7507
0	110.2397
0	299.9202
0	211.7452
0	472.1763
0	1116.9712
0	735.2189
0	741.1335
0	862.4497
0	1168.5243
0	477.5632
0	343.9355
0	635.3461
0	468.9729
0	1144.5304
0	807.9536
0	162.956
0	876.6922
0	1420.2532
0	680.8152
0	848.8064
0	1104.386
0	1189.5832
0	863.0307
0	462.5268
0	877.3984
0	661.7086
0	814.121
0	1110.7507
0	968.3218
0	814.0562
0	627.7046
0	614.5729
0	604.2137
0	791.4174
0	1232.4365
0	951.3195
0	1084.3223
0	1062.2272
0	395.1974
0	327.8462
0	980.2921
0	239.1493
0	988.2858
0	88.274
0	974.5459
0	793.2813
0	1565.2931
0	736.2429
0	424.8079
0	593.9343
0	198.4459
0	959.4384
0	826.6106
0	732.1796
0	201.8202
0	342.7001
0	890.8786
0	421.3519
0	651.3859
0	967.7852
0	720.3672
0	1844.5508
0	976.3282
0	900.638
0	586.8794
0	211.3492
0	631.0028
0	410.6762
0	987.7528
0	232.2713
0	177.3547
0	282.563
0	464.0639
0	372.4771
0	1402.4819
0	112.2244
0	1067.2646
0	494.9179
0	426.8519
0	824.6333
0	782.1089
0	732.6384
0	1005.4459
0	397.2517
0	517.5391
0	544.9978
0	801.7241
0	622.3471
0	590.3316
0	1205.3398
0	1018.8299
0	1216.5659
0	639.9564
0	597.3142
0	315.0685
0	633.4586
0	1529.5073
0	1187.5963
0	137.3597
0	490.8571
0	1189.1997
0	278.5505
0	1097.3866
0	960.5263
0	504.2186
0	671.2991
0	1176.1062
0	1119.5259
0	817.2552
0	423.5981
0	1181.0872
0	782.2775
0	267.1641
0	718.1628
0	1047.8185
0	668.6488
0	1329.5138
0	1306.9493
0	661.9548
0	299.8063
0	800.205799999999
0	1132.1193
0	914.3666
0	857.2961
0	1157.3023
0	991.7307
0	734.4715
0	852.5013
0	1116.129
0	1561.0322
0	381.139
0	889.3264
0	240.4993
0	886.9696
0	445.5915
0	701.6717
0	830.7639
0	574.3255
0	873.8385
0	549.9214
0	902.748
0	1103.4074
0	844.4202
0	430.3621
0	323.2927
0	1057.4506
0	1286.7052
0	872.1884
0	464.8552
0	987.8261
0	822.8022
0	1499.1669
0	1112.829
0	743.9132
0	434.7656
0	691.8817
0	319.6686
0	903.9763
0	466.706
0	2283.2207
0	642.8571
0	1252.8736
0	1113.8311
0	872.7953
0	1096.4392
0	2595.4839
0	1118.3404
0	616.0428
0	1189.6008
0	1343.6226
0	1717.5175
0	804.0712
0	751.0136
0	246.9407
0	880.292
0	392.9671
0	197.4281
0	1196.5801
0	1199.7082
0	1247.5172
0	921.4693
0	1220.878
0	1154.8643
0	1122.1884
0	511.7064
0	1325.8929
0	1194.707
0	1400.1929
0	414.4144
0	351.9067
0	335.0197
0	875.8564
0	863.8094
0	907.99
0	1078.6383
0	1411.7899
0	1247.561
0	957.7626
0	479.5687
0	1361.8451
0	1120.8285
0	876.1812
0	945.6509
0	1418.553
0	978.0033
0	1233.5812
0	917.8715
0	853.9388
0	1615.3115
0	1326.2854
0	437.6004
0	613.7418
0	713.3611
0	960.9705
0	828.1808
0	41.806
0	1067.6692
0	537.233
0	991.3687
0	1199.5037
0	1156.391
0	886.1004
0	987.8168
0	722.7937
0	1492.1021
0	662.4279
0	414.6114
0	1757.1291
0	1240.9867
0	1083.5737
0	1348.2959
0	1299.6862
0	690.3946
0	998.2563
0	2001.2747
0	908.415
0	1267.3358
0	1075.8688
0	970.9767
0	767.3242
0	675.8794
0	824.2147
0	1138.8053
0	787.6573
0	949.7636
0	1148.7266
0	964.9933
0	750.2457
0	1297.2685
0	1211.4908
0	439.6552
0	1163.6281
0	1552.2006
0	1018.5728
0	1300.6882
0	884.2093
0	1365.2174
0	749.3473
0	1147.6678
0	1183.7509
0	1500.7791
0	1277.0788
0	1871.2598
0	1301.8384
0	1297.8142
0	817.8011
0	1671.8222
0	787.4016
0	919.9522
0	234.6934
0	1053.6852
0	737.7483
0	799.508
0	276.2323
0	1040.7596
0	1299.4365
0	724.8908
0	257.2881
0	1510.9356
0	1703.9275
0	1061.2297
0	785.3107
0	837.3206
0	1066.5268
0	810.9685
0	445.0051
0	1110.1982
0	918.6792
0	1371.6377
0	246.3235
0	1549.9337
0	868.121
0	826.5792
0	1513.9373
0	1317.1501
0	952.7306
0	1110.1502
0	1237.3134
0	981.2626
0	886.5169
0	1179.232
0	2485.8466
0	1153.0324
0	1066.9014
0	1281.759
0	910.1004
0	201.1394
0	1399.4334
0	661.6371
0	778.3843
0	1329.8226
0	1211.4561
0	672.6882
0	1056.582
0	1302.8515
0	1477.9736
