# Supplementary material for: Non-coding cancer driver candidates identified with a sample- and position-specific model of the somatic mutation rate
Source: eLife journal article supplement (doi:10.7554/elife.21778), 2017-03-31
Supplement: supp [file elife-21778-supp-v2.zip › elife_poa_e21778_Figure_A2_source_data_1.txt]

gname	in_cosmic	p	p_BH	region_size	type
A1CF	0	0.415868496783736	1	1908	no_overdispersion
ABCC2	0	0.355068319966381	1	4653	no_overdispersion
ABI1	1	0.355601212464567	1	1596	no_overdispersion
ABLIM1	0	0.906767941401539	1	2493	no_overdispersion
AC022400.2	0	1	1	444	no_overdispersion
AC022532.1	0	0.462432236935242	1	474	no_overdispersion
AC069547.1	0	0.074994079299854	0.793456803687179	222	no_overdispersion
AC069547.2	0	0.280083681981816	1	381	no_overdispersion
ACADSB	0	0.810912411915985	1	1299	no_overdispersion
ACBD5	0	0.94629043286627	1	1620	no_overdispersion
ACBD7	0	0.151312897530903	0.948100579858478	267	no_overdispersion
ACSL5	0	0.190329450586554	0.997817560711866	2277	no_overdispersion
ACTA2	0	0.225066744643367	1	1134	no_overdispersion
ACTR1A	0	0.374749519086549	1	1131	no_overdispersion
ADAM12	0	0.0220009622457909	0.506153559145698	2834	no_overdispersion
ADAM8	0	0.977944531992787	1	2475	no_overdispersion
ADAMTS14	0	0.890470002331794	1	3681	no_overdispersion
ADARB2	0	0.910152963255332	1	2429	no_overdispersion
ADD3	0	0.682981803000148	1	2121	no_overdispersion
ADIRF	0	0.00458394606883101	0.239209933608157	231	no_overdispersion
ADK	0	0.890634402119875	1	1103	no_overdispersion
ADO	0	0.994202597090054	1	813	no_overdispersion
ADRA2A	0	0.9966723984134	1	1398	no_overdispersion
ADRB1	0	0.999508996202844	1	1434	no_overdispersion
AFAP1L2	0	0.642887384647155	1	2616	no_overdispersion
AGAP10	0	1	1	2548	no_overdispersion
AGAP4	0	1	1	1992	no_overdispersion
AGAP5	0	0.999999999999912	1	2061	no_overdispersion
AGAP6	0	0.99465612760838	1	2061	no_overdispersion
AGAP7	0	0.989619914030343	1	1992	no_overdispersion
AGAP8	0	0.958269007540277	1	2061	no_overdispersion
AGAP9	0	1	1	2438	no_overdispersion
AIFM2	0	0.0390194137058634	0.638294502864829	1122	no_overdispersion
AKR1C1	0	0.78782705721898	1	1104	no_overdispersion
AKR1C2	0	0.82779619688711	1	1023	no_overdispersion
AKR1C3	0	0.306593423126309	1	987	no_overdispersion
AKR1C4	0	0.869473445830602	1	972	no_overdispersion
AKR1CL1	0	0.317361747032574	1	413	no_overdispersion
AKR1E2	0	0.282979388993376	1	967	no_overdispersion
AL133481.1	0	0.214447162614137	1	1128	no_overdispersion
AL137026.1	0	1	1	78	no_overdispersion
AL138764.1	0	1	1	303	no_overdispersion
AL161645.2	0	0.999999999999988	1	60	no_overdispersion
AL162407.1	0	0.267656806851478	1	372	no_overdispersion
AL353583.1	0	1	1	360	no_overdispersion
AL355490.1	0	0.999999999999992	1	207	no_overdispersion
AL355531.2	0	0.830509871116861	1	642	no_overdispersion
AL359195.1	0	0.196072324566304	1	843	no_overdispersion
AL359878.1	0	0.999999999999987	1	432	no_overdispersion
AL360181.1	0	0.468214364909593	1	105	no_overdispersion
AL391421.1	0	1	1	378	no_overdispersion
AL450307.1	0	0.500958902672752	1	477	no_overdispersion
AL591684.1	0	1	1	486	no_overdispersion
AL603965.1	0	0.404536173297517	1	486	no_overdispersion
ALDH18A1	0	0.979211541374425	1	2388	no_overdispersion
ALOX5	0	0.842309220065499	1	2025	no_overdispersion
ANAPC16	0	0.999999999999997	1	333	no_overdispersion
ANK3	0	0.660870342749764	1	13703	no_overdispersion
ANKRD16	0	0.594506166935454	1	1086	no_overdispersion
ANKRD1	0	0.32141954844732	1	960	no_overdispersion
ANKRD22	0	0.74285893896569	1	576	no_overdispersion
ANKRD26	0	0.585376065361883	1	5586	no_overdispersion
ANKRD2	0	0.518747248873698	1	1083	no_overdispersion
ANKRD30A	0	0.0667991208547187	0.760365258882993	4383	no_overdispersion
ANTXRL	0	0.0880609673387055	0.830058454308269	1918	no_overdispersion
ANXA11	0	0.775423955638191	1	1518	no_overdispersion
ANXA7	0	0.173064294535312	0.97946957474733	1401	no_overdispersion
ANXA8L1	0	1	1	1098	no_overdispersion
ANXA8L2	0	0.855051524052632	1	1098	no_overdispersion
ANXA8	0	1	1	1098	no_overdispersion
AP3M1	0	0.530341863238648	1	1257	no_overdispersion
APBB1IP	0	0.26502037275411	1	2067	no_overdispersion
ARHGAP12	0	0.0755602151904153	0.794441524194463	2541	no_overdispersion
ARHGAP19-SLIT1	0	0.534455457045669	1	1576	no_overdispersion
ARHGAP19	0	0.488940082543899	1	1525	no_overdispersion
ARHGAP21	0	0.829724957580213	1	6020	no_overdispersion
ARHGAP22	0	0.0288738406126671	0.566652171621187	2788	no_overdispersion
ARID5B	0	0.491169111442867	1	3571	no_overdispersion
ARL3	0	0.307521189129177	1	549	no_overdispersion
ARL5B	0	1	1	540	no_overdispersion
ARMC3	0	0.401388323982489	1	2641	no_overdispersion
ARMC4	0	1.48897510134939e-05	0.00511994724135426	3387	no_overdispersion
ARMS2	0	0.239073247426782	1	324	no_overdispersion
AS3MT	0	0.269662315993803	1	1128	no_overdispersion
ASAH2B	0	0.878516995905574	1	569	no_overdispersion
ASAH2C	0	0.933430322997902	1	1869	no_overdispersion
ASAH2	0	0.784974901771549	1	2379	no_overdispersion
ASB13	0	0.399492636090376	1	837	no_overdispersion
ASCC1	0	0.447024645585975	1	1386	no_overdispersion
ATAD1	0	0.999999999999942	1	1119	no_overdispersion
ATE1	0	0.396133821027911	1	1771	no_overdispersion
ATOH7	0	1	1	459	no_overdispersion
ATP5C1	0	0.404422251962936	1	905	no_overdispersion
ATRNL1	0	0.606577053722084	1	4140	no_overdispersion
AVPI1	0	0.0687186212230911	0.765919077238001	444	no_overdispersion
BAG3	0	0.961537191534356	1	1728	no_overdispersion
BAMBI	0	0.406082439570585	1	783	no_overdispersion
BBIP1	0	0.086960281949274	0.824826445152998	436	no_overdispersion
BCCIP	0	0.111213166221571	0.883465647179278	1169	no_overdispersion
BEND7	0	0.587388883186837	1	1610	no_overdispersion
BICC1	0	0.174395024800679	0.97946957474733	3035	no_overdispersion
BLNK	0	0.983815677198867	1	1457	no_overdispersion
BLOC1S2	0	0.515153131110728	1	429	no_overdispersion
BMI1	0	0.828510283279601	1	981	no_overdispersion
BMPR1A	1	0.787999150131408	1	1599	no_overdispersion
BMS1	0	0.89588436801216	1	3849	no_overdispersion
BNIP3	0	0.859975549451453	1	589	no_overdispersion
BTAF1	0	0.332921117240211	1	5550	no_overdispersion
BTBD16	0	0.597151440821043	1	1524	no_overdispersion
BTRC	0	0.396266372922689	1	1818	no_overdispersion
BUB3	0	0.752399055607371	1	1008	no_overdispersion
C10orf105	0	0.625543084974288	1	402	no_overdispersion
C10orf107	0	0.878948315827062	1	627	no_overdispersion
C10orf10	0	0.676516124445887	1	639	no_overdispersion
C10orf111	0	0.129082407860203	0.916185346758595	468	no_overdispersion
C10orf112	0	0.15840550418262	0.963445847458347	4569	no_overdispersion
C10orf113	0	0.284769134499646	1	503	no_overdispersion
C10orf115	0	0.129414209093497	0.916443863482555	285	no_overdispersion
C10orf118	0	0.743415756860053	1	2701	no_overdispersion
C10orf11	0	0.802570718510847	1	600	no_overdispersion
C10orf120	0	0.585661076453231	1	1008	no_overdispersion
C10orf126	0	0.64827269535937	1	519	no_overdispersion
C10orf128	0	0.738126098086271	1	574	no_overdispersion
C10orf129	0	0.193712430086778	0.999790917078751	1443	no_overdispersion
C10orf12	0	0.845240246952775	1	3744	no_overdispersion
C10orf131	0	0.00988106716749975	0.359852757761591	531	no_overdispersion
C10orf137	0	0.757223482480621	1	3717	no_overdispersion
C10orf25	0	0.281078796355564	1	369	no_overdispersion
C10orf2	0	0.994891750017782	1	2070	no_overdispersion
C10orf32	0	0.999999999999992	1	321	no_overdispersion
C10orf35	0	0.758328099542541	1	366	no_overdispersion
C10orf40	0	0.413915446591938	1	387	no_overdispersion
C10orf53	0	0.40567115730991	1	604	no_overdispersion
C10orf54	0	0.365683495347452	1	936	no_overdispersion
C10orf55	0	1	1	456	no_overdispersion
C10orf62	0	0.460920450851762	1	672	no_overdispersion
C10orf67	0	0.999999999999964	1	558	no_overdispersion
C10orf68	0	0.628598936159959	1	2231	no_overdispersion
C10orf71	0	0.68062468520673	1	4394	no_overdispersion
C10orf76	0	0.529309513383817	1	2253	no_overdispersion
C10orf82	0	0.937777104893325	1	709	no_overdispersion
C10orf85	0	0.559348227393246	1	387	no_overdispersion
C10orf88	0	0.642493209996716	1	1338	no_overdispersion
C10orf90	0	0.773651075475325	1	2526	no_overdispersion
C10orf91	0	0.830628848342568	1	438	no_overdispersion
C10orf95	0	0.984962521860246	1	774	no_overdispersion
C10orf99	0	0.276246637681244	1	246	no_overdispersion
C1QL3	0	0.885664691542031	1	768	no_overdispersion
CACNB2	0	0.222293662125699	1	2269	no_overdispersion
CACUL1	0	0.487064630148476	1	1136	no_overdispersion
CALHM1	0	0.486160943573935	1	1041	no_overdispersion
CALHM2	0	0.427540886848096	1	1074	no_overdispersion
CALHM3	0	0.69979637121671	1	1035	no_overdispersion
CALML3	0	0.754624745606759	1	450	no_overdispersion
CALML5	0	0.0022112426749127	0.158879436373578	441	no_overdispersion
CALY	0	0.907944383363574	1	900	no_overdispersion
CAMK1D	0	0.073656302826357	0.789307846864245	1193	no_overdispersion
CAMK2G	0	0.472809615028982	1	1767	no_overdispersion
CASC10	0	0.617249034349814	1	411	no_overdispersion
CASP7	0	0.422115588838117	1	1120	no_overdispersion
CC2D2B	0	0.836665649391929	1	1479	no_overdispersion
CCAR1	0	0.90234642419609	1	3453	no_overdispersion
CCDC147	0	0.394904261966611	1	2667	no_overdispersion
CCDC172	0	1	1	777	no_overdispersion
CCDC3	0	0.133364584958345	0.919674033594066	813	no_overdispersion
CCDC6	1	0.813497894002751	1	1425	no_overdispersion
CCDC7	0	0.772025443485617	1	1461	no_overdispersion
CCNJ	0	0.923209768575709	1	1152	no_overdispersion
CCNY	0	0.569908654855531	1	1026	no_overdispersion
CCSER2	0	0.978124277127429	1	3319	no_overdispersion
CDC123	0	0.264789846570069	1	1011	no_overdispersion
CDH23	0	0.0127959792031054	0.402613358717316	10445	no_overdispersion
CDHR1	0	0.509559147009805	1	2778	no_overdispersion
CDK1	0	0.236422480845433	1	898	no_overdispersion
CDNF	0	0.402699841796268	1	258	no_overdispersion
CELF2	0	0.998474312197202	1	1673	no_overdispersion
CEP55	0	0.258298168603093	1	1395	no_overdispersion
CH25H	0	0.784648825112422	1	819	no_overdispersion
CHAT	0	0.657108669804919	1	2302	no_overdispersion
CHCHD1	0	0.540113877993365	1	408	no_overdispersion
CHST15	0	0.732907684665144	1	1860	no_overdispersion
CHST3	0	0.0471399189531172	0.670480264723974	1440	no_overdispersion
CHUK	0	0.56759278464463	1	2238	no_overdispersion
CISD1	0	0.333876396677051	1	327	no_overdispersion
CLRN3	0	0.817880898974047	1	681	no_overdispersion
CNNM1	0	0.99926900407813	1	2919	no_overdispersion
CNNM2	0	0.350072447118716	1	2666	no_overdispersion
COL13A1	0	0.056912491773763	0.717300629368961	2194	no_overdispersion
COL17A1	0	0.134116175699006	0.919674033594066	4526	no_overdispersion
COMMD3-BMI1	0	0.951971774841814	1	1410	no_overdispersion
COMMD3	0	1	1	588	no_overdispersion
COMTD1	0	0.825775180221669	1	789	no_overdispersion
COX15	0	0.0906635106149168	0.836539102756502	1299	no_overdispersion
CPEB3	0	0.916865680594952	1	2124	no_overdispersion
CPN1	0	0.435027613891678	1	1377	no_overdispersion
CPXM2	0	0.931830634499561	1	2271	no_overdispersion
CREM	0	0.656742312928183	1	1487	no_overdispersion
CRTAC1	0	0.125230924046396	0.912738463562374	2105	no_overdispersion
CSGALNACT2	0	0.451983148556484	1	1651	no_overdispersion
CSTF2T	0	0.991106210597511	1	1851	no_overdispersion
CTBP2	0	0.857628612551991	1	3278	no_overdispersion
CTNNA3	0	0.745357404911698	1	2772	no_overdispersion
CUBN	0	0.969027344566255	1	10896	no_overdispersion
CUEDC2	0	0.0128720361783226	0.403030778292325	864	no_overdispersion
CUL2	0	0.701186923174547	1	2295	no_overdispersion
CUTC	0	0.134111327841046	0.919674033594066	822	no_overdispersion
CUZD1	0	0.0279832610003627	0.558265432163826	1824	no_overdispersion
CWF19L1	0	0.809450373256441	1	1617	no_overdispersion
CXCL12	0	0.429963264472272	1	747	no_overdispersion
CYP17A1	0	0.808314039202824	1	1527	no_overdispersion
CYP26A1	0	0.874978289124215	1	1494	no_overdispersion
CYP26C1	0	0.995720387604978	1	1569	no_overdispersion
CYP2C18	0	0.0205827013281516	0.491144584441439	1473	no_overdispersion
CYP2C19	0	0.00723142898796349	0.304035800419705	1473	no_overdispersion
CYP2C8	0	0.10226645408552	0.865813984631076	1604	no_overdispersion
CYP2C9	0	0.177291886608184	0.983842238768643	1473	no_overdispersion
CYP2E1	0	0.00904844387585293	0.342878887772603	1482	no_overdispersion
DCLRE1A	0	0.978231836601789	1	3123	no_overdispersion
DCLRE1C	0	0.00860662212946028	0.336847796188795	2228	no_overdispersion
DDIT4	0	0.714151083791799	1	699	no_overdispersion
DDX21	0	0.350500486392325	1	2352	no_overdispersion
DDX50	0	0.635416057193935	1	2214	no_overdispersion
DHTKD1	0	0.0859405214717752	0.822332091076731	2760	no_overdispersion
DHX32	0	0.416503046855131	1	2232	no_overdispersion
DIP2C	0	0.889681812873269	1	4863	no_overdispersion
DKFZP667F0711	0	0.827797760646066	1	552	no_overdispersion
DKK1	0	0.352465305471309	1	801	no_overdispersion
DLG5	0	0.949162045209422	1	5760	no_overdispersion
DMBT1	0	0.131974004699236	0.919345380788583	7629	no_overdispersion
DNA2	0	0.931931004155488	1	3446	no_overdispersion
DNAJB12	0	1	1	1260	no_overdispersion
DNAJC12	0	0.325635803232101	1	714	no_overdispersion
DNAJC1	0	0.796724546763119	1	1665	no_overdispersion
DNAJC9	0	0.124781419813859	0.911875149880709	783	no_overdispersion
DNMBP	0	0.0502236915460714	0.690106096086663	4806	no_overdispersion
DNTT	0	0.93143057702042	1	1530	no_overdispersion
DOCK1	0	0.904085589970561	1	5598	no_overdispersion
DPCD	0	0.6261862564091	1	1362	no_overdispersion
DPYSL4	0	0.61998196379937	1	1719	no_overdispersion
DRGX	0	0.302279863877989	1	841	no_overdispersion
DUPD1	0	0.875178917629127	1	663	no_overdispersion
DUSP13	0	0.471386122991605	1	1879	no_overdispersion
DUSP5	0	0.810886817925679	1	1155	no_overdispersion
DYDC1	0	0.710787934918615	1	585	no_overdispersion
DYDC2	0	0.181957282312799	0.99041093725733	576	no_overdispersion
EBF3	0	0.472033706021788	1	1791	no_overdispersion
EBLN1	0	0.502981520530082	1	1101	no_overdispersion
ECD	0	0.611845648591063	1	2034	no_overdispersion
ECHDC3	0	0.557467952399874	1	912	no_overdispersion
ECHS1	0	0.367548578456066	1	873	no_overdispersion
EGR2	0	0.423134081608128	1	1431	no_overdispersion
EIF3A	0	0.96412522516355	1	4149	no_overdispersion
EIF4EBP2	0	1	1	363	no_overdispersion
EIF5AL1	0	1	1	465	no_overdispersion
ELOVL3	0	0.713468908555465	1	813	no_overdispersion
EMX2	0	0.959875829767299	1	759	no_overdispersion
ENKUR	0	0.421130867432492	1	775	no_overdispersion
ENO4	0	0.683617428101377	1	1961	no_overdispersion
ENTPD1	0	0.489953718171906	1	1622	no_overdispersion
ENTPD7	0	0.622144266270666	1	1815	no_overdispersion
EPC1	0	0.518488097051306	1	2514	no_overdispersion
ERCC6-PGBD3	0	0.311331958977853	1	3186	no_overdispersion
ERCC6	0	0.0170492733002118	0.457243463327129	4482	no_overdispersion
ERLIN1	0	0.0276008873610847	0.553814554899059	1047	no_overdispersion
EXOC6	0	0.526490825858301	1	2568	no_overdispersion
EXOSC1	0	0.999999999999936	1	588	no_overdispersion
FAM107B	0	0.133671977608132	0.919674033594066	921	no_overdispersion
FAM13C	0	0.0301334305927649	0.579918846807282	1954	no_overdispersion
FAM149B1	0	0.685401059025959	1	1749	no_overdispersion
FAM160B1	0	0.573763216808071	1	2335	no_overdispersion
FAM170B	0	0.746649235583386	1	852	no_overdispersion
FAM171A1	0	0.193261701454426	0.999790917078751	2673	no_overdispersion
FAM175B	0	0.545067703396177	1	1248	no_overdispersion
FAM178A	0	0.394857736440981	1	3884	no_overdispersion
FAM188A	0	0.754193706098535	1	1338	no_overdispersion
FAM196A	0	0.85936128717217	1	1440	no_overdispersion
FAM204A	0	0.808308676491865	1	702	no_overdispersion
FAM208B	0	0.940679258170677	1	7293	no_overdispersion
FAM213A	0	0.786364398987732	1	690	no_overdispersion
FAM21A	0	0.999266072538508	1	4053	no_overdispersion
FAM21B	0	0.999999526121037	1	3762	no_overdispersion
FAM21C	0	0.950357694937456	1	3963	no_overdispersion
FAM21D	0	1	1	927	no_overdispersion
FAM24A	0	0.507983714975372	1	318	no_overdispersion
FAM24B	0	0.999999999999963	1	285	no_overdispersion
FAM25A	0	0.999999999999945	1	270	no_overdispersion
FAM25B	0	1	1	270	no_overdispersion
FAM25C	0	0.570592896513397	1	270	no_overdispersion
FAM25E	0	0.999999999999939	1	528	no_overdispersion
FAM25G	0	1	1	270	no_overdispersion
FAM35A	0	0.253395177783952	1	2715	no_overdispersion
FAM45A	0	0.282928063734509	1	1074	no_overdispersion
FAM53B	0	0.331016856852222	1	1281	no_overdispersion
FANK1	0	0.80400753701942	1	1203	no_overdispersion
FAS	1	0.0057230951604255	0.271824133151501	1027	no_overdispersion
FBXL15	0	0.969929387291538	1	903	no_overdispersion
FBXO18	0	0.230920202847571	1	3337	no_overdispersion
FBXW4	0	0.780040181357248	1	1239	no_overdispersion
FFAR4	0	0.877646477062772	1	1149	no_overdispersion
FGF8	0	0.894490586224119	1	735	no_overdispersion
FGFBP3	0	0.962113700148108	1	777	no_overdispersion
FGFR2	1	0.470627354109895	1	2854	no_overdispersion
FOXI2	0	0.87003783225219	1	957	no_overdispersion
FRA10AC1	0	0.652200667569252	1	1117	no_overdispersion
FRAT1	0	0.964016277269068	1	840	no_overdispersion
FRAT2	0	1	1	702	no_overdispersion
FRG2B	0	6.51548548085299e-08	5.01848753677221e-05	840	no_overdispersion
FRMD4A	0	0.998363947800422	1	3692	no_overdispersion
FRMPD2	0	0.036834201845767	0.629295354366622	3949	no_overdispersion
FUOM	0	0.854794446547301	1	472	no_overdispersion
FUT11	0	1	1	1576	no_overdispersion
FXYD4	0	0.999999999999967	1	270	no_overdispersion
FZD8	0	0.999994392283194	1	2085	no_overdispersion
GAD2	0	0.941046239710639	1	1766	no_overdispersion
GATA3	1	0.819565730257923	1	1335	no_overdispersion
GBF1	0	0.392618969840043	1	5580	no_overdispersion
GDF10	0	0.394026440357667	1	1437	no_overdispersion
GDF2	0	0.161681437408975	0.970189391943665	1290	no_overdispersion
GDI2	0	0.195524568341711	1	1395	no_overdispersion
GFRA1	0	0.854641447188315	1	1468	no_overdispersion
GHITM	0	0.447665481330964	1	1038	no_overdispersion
GJD4	0	0.923066127059981	1	1113	no_overdispersion
GLRX3	0	0.404341732559431	1	1008	no_overdispersion
GLUD1	0	0.685113214352374	1	1723	no_overdispersion
GOLGA7B	0	0.999999999999968	1	504	no_overdispersion
GOLGA7B	0	0.0254381563744825	0.533011032804173	771	no_overdispersion
GOT1	0	0.119856554209804	0.903264756336997	1297	no_overdispersion
GPAM	0	0.812497989648584	1	2499	no_overdispersion
GPR123	0	0.97437889810003	1	3843	no_overdispersion
GPR158	0	5.9800322934204e-05	0.0143939377302629	3648	no_overdispersion
GPR26	0	0.512383887295724	1	1014	no_overdispersion
GPRIN2	0	0.0201133910130379	0.48656213234555	1377	no_overdispersion
GRID1	0	0.689025668129654	1	3030	no_overdispersion
GRK5	0	0.330124937760479	1	1773	no_overdispersion
GSTO1	0	0.622440259053555	1	726	no_overdispersion
GSTO2	0	0.495086354969154	1	765	no_overdispersion
GTPBP4	0	0.994332334361985	1	1905	no_overdispersion
H2AFY2	0	0.721690431700047	1	1119	no_overdispersion
HABP2	0	0.882199791057191	1	1755	no_overdispersion
HECTD2	0	0.712988187072583	1	2367	no_overdispersion
HELLS	0	0.757312862398514	1	2685	no_overdispersion
HERC4	0	0.787277121519876	1	3337	no_overdispersion
HHEX	0	0.776475482482968	1	813	no_overdispersion
HIF1AN	0	0.237582714737718	1	1050	no_overdispersion
HK1	0	0.122236927853017	0.905857496187046	3009	no_overdispersion
HKDC1	0	0.499047690297093	1	2803	no_overdispersion
HMX2	0	0.738552496495338	1	822	no_overdispersion
HMX3	0	0.9990206098861	1	1074	no_overdispersion
HNRNPF	0	0.831346984198547	1	1248	no_overdispersion
HNRNPH3	0	0.258719713817802	1	1041	no_overdispersion
HOGA1	0	0.571727118804009	1	984	no_overdispersion
HPS1	0	0.719769860388408	1	2141	no_overdispersion
HPS6	0	0.598775850277448	1	2328	no_overdispersion
HPSE2	0	0.718867851423385	1	1813	no_overdispersion
HSPA12A	0	0.144367327300238	0.934479535791837	2028	no_overdispersion
HSPA14	0	0.625154726444412	1	1741	no_overdispersion
HTR7	0	0.11213343365596	0.886388094613779	1542	no_overdispersion
HTRA1	0	0.22103092618296	1	1443	no_overdispersion
HUG1	0	0.938377953912347	1	1089	no_overdispersion
IDE	0	0.842899696762897	1	3060	no_overdispersion
IDI1	0	0.658221196881957	1	855	no_overdispersion
IDI2	0	0.178990317754112	0.987009610158414	684	no_overdispersion
IFIT1B	0	0.24431582770649	1	1425	no_overdispersion
IFIT1	0	0.145158918748306	0.935155617068377	1437	no_overdispersion
IFIT2	0	0.236288323559472	1	1419	no_overdispersion
IFIT3	0	0.934281208180453	1	1478	no_overdispersion
IFIT5	0	0.145711324510225	0.935896352491292	1449	no_overdispersion
IKZF5	0	0.351347438107566	1	1260	no_overdispersion
IL15RA	0	0.937050227157332	1	871	no_overdispersion
IL2RA	0	0.302516727546722	1	819	no_overdispersion
INA	0	0.724666291189475	1	1500	no_overdispersion
INPP5A	0	0.673354222332577	1	1314	no_overdispersion
INPP5F	0	0.673035737558935	1	3515	no_overdispersion
IPMK	0	0.232272951860177	1	1251	no_overdispersion
ITGA8	0	0.859665958726139	1	3192	no_overdispersion
ITGB1	0	0.556657225482807	1	2588	no_overdispersion
ITIH2	0	0.124456445077866	0.910898709433899	2841	no_overdispersion
ITIH5	0	0.539333628361776	1	3048	no_overdispersion
ITPRIP	0	0.724214128133592	1	1644	no_overdispersion
JAKMIP3	0	0.499008581481262	1	2535	no_overdispersion
JMJD1C	0	0.839609093804163	1	7623	no_overdispersion
KAT6B	1	0.96511448040053	1	6222	no_overdispersion
KAZALD1	0	0.909285482628714	1	915	no_overdispersion
KCNIP2	0	0.957376274165927	1	967	no_overdispersion
KCNK18	0	0.0464585346177811	0.668114669604177	1155	no_overdispersion
KCNMA1	0	0.774836482636435	1	4432	no_overdispersion
KIAA1217	0	0.219297153214932	1	5964	no_overdispersion
KIAA1279	0	0.166474790560282	0.974434838098196	1866	no_overdispersion
KIAA1462	0	0.268967964304198	1	4080	no_overdispersion
KIAA1598	1	0.11065022004837	0.881904237272936	1984	no_overdispersion
KIF11	0	0.593563773520612	1	3171	no_overdispersion
KIF20B	0	0.321747886833547	1	5734	no_overdispersion
KIF5B	1	0.183046327866744	0.993132228540854	2892	no_overdispersion
KIN	0	0.947472266083046	1	1254	no_overdispersion
KLF6	1	0.57262795329286	1	1022	no_overdispersion
KLLN	0	0.683242023225207	1	537	no_overdispersion
KNDC1	0	0.759648546063272	1	5298	no_overdispersion
LARP4B	0	0.0197396874924601	0.482787266701178	2217	no_overdispersion
LBX1	0	0.486562191793452	1	846	no_overdispersion
LCOR	0	0.760090167552753	1	1309	no_overdispersion
LDB1	0	0.575739961399466	1	1236	no_overdispersion
LDB3	0	0.291521758823718	1	2508	no_overdispersion
LGI1	0	0.653370450483922	1	1674	no_overdispersion
LHPP	0	0.916656533066185	1	828	no_overdispersion
LINC00999	0	0.680662644669431	1	378	no_overdispersion
LIPA	0	0.88181372560322	1	1261	no_overdispersion
LIPF	0	0.0833765121234773	0.816117499259694	1227	no_overdispersion
LIPJ	0	1	1	1101	no_overdispersion
LIPK	0	0.431213784913065	1	1200	no_overdispersion
LIPM	0	0.543384036369225	1	1299	no_overdispersion
LIPN	0	0.0863274746749596	0.822524419763	1197	no_overdispersion
LOXL4	0	0.709311406786149	1	2271	no_overdispersion
LRIT1	0	0.605135370590319	1	1872	no_overdispersion
LRIT2	0	0.85361213653467	1	1683	no_overdispersion
LRRC18	0	0.00289058487082696	0.190531365229881	790	no_overdispersion
LRRC20	0	0.0233303313980237	0.517654037734734	555	no_overdispersion
LRRC27	0	0.0860572164080881	0.822332091076731	1863	no_overdispersion
LRRTM3	0	0.882163996036181	1	1746	no_overdispersion
LYZL1	0	1	1	585	no_overdispersion
LYZL2	0	0.298166750930292	1	585	no_overdispersion
LZTS2	0	0.839934210975434	1	2010	no_overdispersion
MAP3K8	0	0.596751483727044	1	1467	no_overdispersion
MAPK8	0	0.0587439518347597	0.719777120334172	1330	no_overdispersion
MARCH5	0	0.886223679594531	1	837	no_overdispersion
MARCH8	0	0.691661042820817	1	1722	no_overdispersion
MARVELD1	0	0.999999999999971	1	522	no_overdispersion
MASTL	0	0.99701779954539	1	2640	no_overdispersion
MAT1A	0	0.100437996537084	0.860718318343609	1188	no_overdispersion
MBL2	0	0.797453254872926	1	747	no_overdispersion
MCM10	0	0.577346349792394	1	2655	no_overdispersion
MCMBP	0	0.284213280910185	1	1929	no_overdispersion
MCU	0	0.0138234823794326	0.412526369876691	1157	no_overdispersion
MEIG1	0	0.119852875999819	0.903264756336997	267	no_overdispersion
METTL10	0	0.448281857291384	1	876	no_overdispersion
MGEA5	0	0.348547876619425	1	2908	no_overdispersion
MGMT	0	0.93555735822598	1	717	no_overdispersion
MICU1	0	0.134992485029958	0.919924962369385	1559	no_overdispersion
MINPP1	0	1	1	1498	no_overdispersion
MKI67	0	0.664809650629608	1	9771	no_overdispersion
MKX	0	0.890551523468131	1	1059	no_overdispersion
MLLT10	1	0.692809588149728	1	3661	no_overdispersion
MMP21	0	0.953744692416234	1	1710	no_overdispersion
MMRN2	0	0.966209959166914	1	2850	no_overdispersion
MMS19	0	0.826342164506846	1	3099	no_overdispersion
MORN4	0	0.999999999999996	1	756	no_overdispersion
MPP7	0	0.037754426573743	0.634317389822737	1824	no_overdispersion
MRC1L1	0	0.999975153482401	1	4461	no_overdispersion
MRC1	0	0.999997968506655	1	4371	no_overdispersion
MRPL43	0	0.82438076588545	1	939	no_overdispersion
MRPS16	0	0.31835234908908	1	538	no_overdispersion
MSMB	0	0.999999999999975	1	345	no_overdispersion
MSRB2	0	0.379006562744756	1	549	no_overdispersion
MSS51	0	0.651916836999559	1	1383	no_overdispersion
MTG1	0	0.721617273445097	1	1005	no_overdispersion
MTPAP	0	0.857480617970449	1	2296	no_overdispersion
MTRNR2L5	0	1	1	75	no_overdispersion
MTRNR2L7	0	0.0384945264108164	0.637893086218286	75	no_overdispersion
MXI1	0	0.926920741186381	1	961	no_overdispersion
MYO3A	0	0.5199267824414	1	4971	no_overdispersion
MYOF	0	0.957025447447132	1	6323	no_overdispersion
MYOZ1	0	0.223953499860906	1	900	no_overdispersion
MYPN	0	0.0696428511015849	0.772806966390277	4105	no_overdispersion
NAMPTL	0	0.999999999999939	1	363	no_overdispersion
NANOS1	0	0.985480252119882	1	879	no_overdispersion
NCOA4	1	0.991161157514425	1	1978	no_overdispersion
NDST2	0	0.535016531266901	1	2652	no_overdispersion
NDUFB8	0	0.126989811641699	0.914968119245506	612	no_overdispersion
NEBL	0	0.0665701552306992	0.759890528138353	3476	no_overdispersion
NET1	0	0.79036863958119	1	1884	no_overdispersion
NEURL	0	0.965678809959064	1	1759	no_overdispersion
NEUROG3	0	0.971702738202064	1	645	no_overdispersion
NFKB2	1	0.675684753269135	1	2703	no_overdispersion
NHLRC2	0	0.923351034502811	1	2181	no_overdispersion
NKX1-2	0	0.99920585373674	1	999	no_overdispersion
NKX2-3	0	0.934450431312189	1	1095	no_overdispersion
NKX6-2	0	0.998707524444859	1	834	no_overdispersion
NMT2	0	0.997709655021798	1	1568	no_overdispersion
NOC3L	0	0.391518115896612	1	2430	no_overdispersion
NODAL	0	0.210687838759962	1	1044	no_overdispersion
NOLC1	0	0.0432976851194347	0.65567116324665	2133	no_overdispersion
NPFFR1	0	0.833495466952893	1	1293	no_overdispersion
NPM3	0	0.999999999999907	1	537	no_overdispersion
NPS	0	0.413874649348792	1	270	no_overdispersion
NPY4R	0	0.450594740750451	1	1128	no_overdispersion
NRAP	0	0.951186483337624	1	5217	no_overdispersion
NRBF2	0	0.493180098977803	1	919	no_overdispersion
NRG3	0	0.40142479493723	1	2476	no_overdispersion
NRP1	0	0.381765344416986	1	3381	no_overdispersion
NSMCE4A	0	0.884519475301374	1	1273	no_overdispersion
NSUN6	0	0.891705823339434	1	1410	no_overdispersion
NT5C2	1	0.699776353195815	1	1734	no_overdispersion
NUDT13	0	0.0691340358868499	0.769382818516829	1059	no_overdispersion
NUDT5	0	1	1	761	no_overdispersion
NUTM2A	1	0.999988177859661	1	2676	no_overdispersion
NUTM2B	1	0.998399129576714	1	2676	no_overdispersion
NUTM2D	0	0.999999999999952	1	2460	no_overdispersion
NUTM2E	0	0.999986229267279	1	2763	no_overdispersion
OAT	0	0.270190404485668	1	1320	no_overdispersion
OBFC1	0	0.0380148445164756	0.634918600158264	1107	no_overdispersion
OGDHL	0	0.158814167876012	0.963445847458347	3033	no_overdispersion
OIT3	0	0.690644296498455	1	1638	no_overdispersion
OLAH	0	0.0656822249913036	0.754640169709154	957	no_overdispersion
OPALIN	0	0.492447526989068	1	435	no_overdispersion
OPN4	0	0.596854068091396	1	1470	no_overdispersion
OPTN	0	0.82593826534882	1	1734	no_overdispersion
OR13A1	0	0.993853484828765	1	987	no_overdispersion
OTUD1	0	0.975944825471675	1	1446	no_overdispersion
P4HA1	0	0.439774746637582	1	1680	no_overdispersion
PALD1	0	0.65884901141402	1	2571	no_overdispersion
PANK1	0	0.98664089414563	1	1919	no_overdispersion
PAOX	0	0.840084884589608	1	1619	no_overdispersion
PAPSS2	0	0.758553409043099	1	1899	no_overdispersion
PARD3	0	0.996554046836649	1	4110	no_overdispersion
PARG	0	0.107788408324937	0.875808198393551	1476	no_overdispersion
PAX2	0	0.934728004401699	1	1337	no_overdispersion
PBLD	0	0.513176162280178	1	956	no_overdispersion
PCBD1	0	1	1	315	no_overdispersion
PCDH15	0	0.220385776256612	1	7542	no_overdispersion
PCGF5	0	0.367375980714327	1	809	no_overdispersion
PCGF6	0	1	1	1053	no_overdispersion
PDCD11	0	0.166386812094006	0.974434838098196	5616	no_overdispersion
PDCD4	0	0.0321655248035962	0.596130265272424	1420	no_overdispersion
PDE6C	0	0.629942947754224	1	2577	no_overdispersion
PDLIM1	0	0.181796318218004	0.99041093725733	990	no_overdispersion
PDSS1	0	0.201079897855148	1	1252	no_overdispersion
PDZD7	0	0.0816884829983352	0.81101823255984	1558	no_overdispersion
PDZD8	0	0.872530628556348	1	3465	no_overdispersion
PFKFB3	0	0.438318683568282	1	1817	no_overdispersion
PFKP	0	0.132113907774309	0.919345380788583	2443	no_overdispersion
PGAM1	0	0.418380335510658	1	765	no_overdispersion
PGBD3	0	0.311331958977853	1	3186	no_overdispersion
PHYHIPL	0	0.0597955008354323	0.727367128292536	1203	no_overdispersion
PHYH	0	0.66033307329484	1	1045	no_overdispersion
PI4K2A	0	0.914705355821645	1	1785	no_overdispersion
PI4K2A	0	0.710092527663139	1	1350	no_overdispersion
PIK3AP1	0	0.553383399873326	1	2590	no_overdispersion
PIP4K2A	0	0.875863282333978	1	1263	no_overdispersion
PITRM1	0	0.00754018739604016	0.312450274011233	3145	no_overdispersion
PITX3	0	0.806791480203553	1	909	no_overdispersion
PKD2L1	0	0.154486650926214	0.954694628127862	2418	no_overdispersion
PLA2G12B	0	0.0928809511912514	0.840540283349155	588	no_overdispersion
PLAC9	0	0.721768721696829	1	385	no_overdispersion
PLAU	0	0.0782361093296475	0.802618285163395	1330	no_overdispersion
PLCE1	0	0.650637524683112	1	7191	no_overdispersion
PLEKHA1	0	0.0331592630187611	0.601444125089932	1320	no_overdispersion
PLEKHS1	0	0.327241621474557	1	1648	no_overdispersion
PLXDC2	0	0.00453566427643302	0.239209933608157	1590	no_overdispersion
PNLIPRP1	0	0.744834119825308	1	1432	no_overdispersion
PNLIPRP2	0	0.993637465315738	1	1407	no_overdispersion
PNLIPRP3	0	0.0945653592492269	0.842111169325225	1404	no_overdispersion
PNLIP	0	0.472034188293825	1	1398	no_overdispersion
POLL	0	0.730549510640752	1	1812	no_overdispersion
POLR3A	0	0.130342654168084	0.916737627487008	4173	no_overdispersion
PPA1	0	0.00793303929844616	0.320248647234548	896	no_overdispersion
PPAPDC1A	0	0.50318500393712	1	928	no_overdispersion
PPIF	0	0.742317872080398	1	624	no_overdispersion
PPP1R3C	0	0.183784195001657	0.993249637651391	954	no_overdispersion
PPP2R2D	0	0.517355826826461	1	408	no_overdispersion
PPP3CB	0	0.566926753709185	1	1757	no_overdispersion
PPRC1	0	0.107036999694773	0.875182040251278	4995	no_overdispersion
PRAP1	0	0.325901834137461	1	459	no_overdispersion
PRDX3	0	0.797203151797575	1	771	no_overdispersion
PRF1	1	0.268318311083852	1	1668	no_overdispersion
PRKCQ	0	0.79285576301956	1	2121	no_overdispersion
PRKG1	0	0.42166683934433	1	2371	no_overdispersion
PRLHR	0	0.997093189132045	1	1113	no_overdispersion
PROSER2	0	0.839200811787995	1	1308	no_overdispersion
PRPF18	0	0.334318368711352	1	1029	no_overdispersion
PRR26	0	0.89128198417885	1	1043	no_overdispersion
PRTFDC1	0	1	1	861	no_overdispersion
PSAP	0	0.186791801235126	0.995360284736809	1581	no_overdispersion
PSD	0	0.6052673508047	1	3075	no_overdispersion
PSTK	0	0.796837931066957	1	1134	no_overdispersion
PTCHD3	0	0.397006352628458	1	2304	no_overdispersion
PTEN	1	8.40111850448295e-32	4.04429844805809e-28	1212	no_overdispersion
PTER	0	0.419157838730808	1	1050	no_overdispersion
PTF1A	0	0.865245796598076	1	987	no_overdispersion
PTPLA	0	0.618439927319657	1	1087	no_overdispersion
PTPN20A	0	1	1	1281	no_overdispersion
PTPN20B	0	1	1	1281	no_overdispersion
PTPRE	0	0.944986472616134	1	2138	no_overdispersion
PWWP2B	0	0.823151771585169	1	1787	no_overdispersion
PYROXD2	0	0.7094503859874	1	1746	no_overdispersion
R3HCC1L	0	0.585968750083264	1	2373	no_overdispersion
RAB11FIP2	0	0.613281933773601	1	1599	no_overdispersion
RAB18	0	0.0234955145918237	0.517654037734734	621	no_overdispersion
RASGEF1A	0	0.838354993776502	1	1470	no_overdispersion
RASSF4	0	0.133835146573492	0.919674033594066	1069	no_overdispersion
RBM17	0	0.434223338174255	1	1206	no_overdispersion
RBM20	0	0.722557136378544	1	3684	no_overdispersion
RBP3	0	0.639780395327849	1	3744	no_overdispersion
RBP4	0	0.408930341708024	1	657	no_overdispersion
REEP3	0	0.167125470359644	0.97505897755112	768	no_overdispersion
RET	1	0.884652739918238	1	3377	no_overdispersion
RGR	0	0.877838014602606	1	931	no_overdispersion
RGS10	0	0.207875597687321	1	578	no_overdispersion
RHOBTB1	0	0.848945461182122	1	2091	no_overdispersion
RNLS	0	0.00961780168088162	0.353435857189039	1101	no_overdispersion
RP11-108K14.8	0	0.27005956733882	1	1020	no_overdispersion
RP11-139J15.7	0	0.52330646526471	1	275	no_overdispersion
RP11-242G20.1	0	0.703008268141763	1	384	no_overdispersion
RP11-248J23.6	0	0.448879497137821	1	1326	no_overdispersion
RP11-332O19.5	0	0.0310652232505741	0.588771593418361	687	no_overdispersion
RP11-451M19.3	0	0.417709781158463	1	522	no_overdispersion
RPP30	0	0.63909879316357	1	980	no_overdispersion
RPP38	0	0.265696179312435	1	852	no_overdispersion
RPS24	0	0.386548444680328	1	888	no_overdispersion
RRP12	0	0.579091008982694	1	3894	no_overdispersion
RSU1	0	0.897999452193373	1	834	no_overdispersion
RTKN2	0	0.260041696320134	1	1963	no_overdispersion
RUFY2	0	0.961493605210742	1	2154	no_overdispersion
SAMD8	0	0.234626279649943	1	1475	no_overdispersion
SAR1A	0	0.442053229649166	1	615	no_overdispersion
SCD	0	0.276584871837882	1	1080	no_overdispersion
SEC23IP	0	0.20640347217218	1	3003	no_overdispersion
SEC24C	0	0.590366696535336	1	3354	no_overdispersion
SEC31B	0	0.747286629885295	1	3588	no_overdispersion
SEC61A2	0	0.546823193580808	1	1564	no_overdispersion
SEMA4G	0	0.665840496155777	1	2936	no_overdispersion
SEPHS1	0	0.104915412967852	0.871011061757215	1190	no_overdispersion
SFMBT2	0	0.128615473958186	0.915872739547107	2768	no_overdispersion
SFR1	0	0.246935794114284	1	937	no_overdispersion
SFRP5	0	0.960964101760285	1	954	no_overdispersion
SFTPA1	0	0.0141002947229581	0.416434471143069	794	no_overdispersion
SFTPA2	0	0.260293739327861	1	747	no_overdispersion
SFTPD	0	0.675420158437557	1	1128	no_overdispersion
SFXN2	0	0.0248964482874038	0.52940157869319	969	no_overdispersion
SFXN3	0	0.277214209993161	1	978	no_overdispersion
SFXN4	0	0.342224522017392	1	1014	no_overdispersion
SGMS1	0	0.701724935283874	1	1461	no_overdispersion
SGPL1	0	0.919301583265539	1	1707	no_overdispersion
SH2D4B	0	0.997081501830009	1	1339	no_overdispersion
SH3PXD2A	0	0.927934533613265	1	3720	no_overdispersion
SHOC2	0	0.505310962194706	1	1749	no_overdispersion
SIRT1	0	0.800570931836755	1	2277	no_overdispersion
SKIDA1	0	0.975419422729457	1	2727	no_overdispersion
SLC16A12	0	0.160233118165026	0.966605210904946	1551	no_overdispersion
SLC16A9	0	0.551953891026484	1	1530	no_overdispersion
SLC18A2	0	0.928050936711593	1	1545	no_overdispersion
SLC18A3	0	0.616651641198063	1	1599	no_overdispersion
SLC25A16	0	0.829590258702717	1	999	no_overdispersion
SLC25A28	0	0.678723227975961	1	1095	no_overdispersion
SLC29A3	0	0.205740918689923	1	1428	no_overdispersion
SLC35G1	0	0.587814743967824	1	1098	no_overdispersion
SLC39A12	0	0.0396760333835291	0.638294502864829	2076	no_overdispersion
SLIT1	0	0.906962784507973	1	4750	no_overdispersion
SLK	0	0.462024153766931	1	3708	no_overdispersion
SMC3	0	0.780850501468179	1	3654	no_overdispersion
SMNDC1	0	0.79956259616656	1	717	no_overdispersion
SNCG	0	0.999999999999991	1	436	no_overdispersion
SORBS1	0	0.435111914411141	1	5547	no_overdispersion
SORCS1	0	0.00778562869347251	0.316287059328073	3733	no_overdispersion
SORCS3	0	0.762003310038342	1	3671	no_overdispersion
SPAG6	0	0.110342645333828	0.880911268054806	1804	no_overdispersion
SPOCK2	0	0.477288730445449	1	1329	no_overdispersion
SPRN	0	1	1	456	no_overdispersion
SRGN	0	1	1	477	no_overdispersion
ST8SIA6	0	0.486010279623888	1	1197	no_overdispersion
STAMBPL1	0	0.547546326092278	1	1443	no_overdispersion
STAM	0	0.831366800932553	1	1623	no_overdispersion
STK32C	0	0.994822701442409	1	1500	no_overdispersion
STOX1	0	0.0409987658237312	0.645180611606859	2970	no_overdispersion
SUFU	1	0.881556570785186	1	1611	no_overdispersion
SUPV3L1	0	0.377461213687006	1	2361	no_overdispersion
SUV39H2	0	0.120559210872342	0.903490644987228	1233	no_overdispersion
SVIL	0	0.606782060726497	1	6738	no_overdispersion
SYCE1	0	0.557784460510671	1	1095	no_overdispersion
SYNPO2L	0	0.497140243129944	1	3034	no_overdispersion
SYT15	0	0.748468088672349	1	1680	no_overdispersion
TACC2	0	0.28440438843026	1	9098	no_overdispersion
TACR2	0	0.708301869541103	1	1197	no_overdispersion
TAF3	0	0.276747720378121	1	2790	no_overdispersion
TAF5	0	0.00183385781802181	0.146094530069688	2403	no_overdispersion
TBATA	0	0.0177805137273251	0.464822749330437	1091	no_overdispersion
TBC1D12	0	0.996187374158791	1	2328	no_overdispersion
TCERG1L	0	0.582898270204073	1	1761	no_overdispersion
TCF7L2	1	0.0394935735079174	0.638294502864829	2103	no_overdispersion
TCTN3	0	0.636622635914724	1	2007	no_overdispersion
TDRD1	0	0.385366333732557	1	3575	no_overdispersion
TECTB	0	0.898782715503916	1	990	no_overdispersion
TET1	1	0.241669467819939	1	6411	no_overdispersion
TEX36	0	1	1	561	no_overdispersion
TFAM	0	0.648306152320256	1	741	no_overdispersion
THNSL1	0	0.833769665782655	1	2232	no_overdispersion
TIAL1	0	0.174418423961809	0.97946957474733	1181	no_overdispersion
TIMM23B	0	1	1	454	no_overdispersion
TIMM23	0	0.913204940088661	1	630	no_overdispersion
TLL2	0	0.985158352393243	1	3048	no_overdispersion
TLX1NB	0	0.59841954068226	1	369	no_overdispersion
TLX1	1	0.927394336635525	1	997	no_overdispersion
TM9SF3	0	0.987675007952074	1	1770	no_overdispersion
TMEM180	0	0.91985316138679	1	1641	no_overdispersion
TMEM236	0	0.999999999999942	1	1056	no_overdispersion
TMEM236	0	0.916861774911304	1	1056	no_overdispersion
TMEM254	0	1	1	433	no_overdispersion
TMEM26	0	0.166270419295857	0.974434838098196	1174	no_overdispersion
TMEM72	0	0.617686697940144	1	474	no_overdispersion
TNKS2	0	0.922422789458305	1	3501	no_overdispersion
TRDMT1	0	0.577338786633049	1	1235	no_overdispersion
TRIM8	0	0.520394856255532	1	1656	no_overdispersion
TRUB1	0	0.513334661711453	1	1050	no_overdispersion
TSPAN14	0	0.178072650887224	0.984972242137662	813	no_overdispersion
TSPAN15	0	0.545689500951544	1	885	no_overdispersion
TTC18	0	0.458408852716153	1	3370	no_overdispersion
TTC40	0	0.999996678805566	1	8482	no_overdispersion
TUBAL3	0	0.510113629342831	1	1341	no_overdispersion
TUBB8	0	0.435080458400026	1	1335	no_overdispersion
TUBGCP2	0	0.0809440272848235	0.809785025625101	2793	no_overdispersion
TYSND1	0	0.983256336117633	1	1701	no_overdispersion
UBE2D1	0	0.57650079239504	1	444	no_overdispersion
UBTD1	0	0.704540364158774	1	684	no_overdispersion
UCMA	0	0.339630491072097	1	417	no_overdispersion
UCN3	0	1	1	486	no_overdispersion
UNC5B	0	0.685433327931253	1	2838	no_overdispersion
UPF2	0	0.32937850977513	1	3819	no_overdispersion
UROS	0	0.175624772852979	0.980149246269616	832	no_overdispersion
USMG5	0	0.0175448779414165	0.463366999958682	177	no_overdispersion
USP54	0	0.46650944201295	1	5230	no_overdispersion
USP6NL	0	0.325861089272826	1	2689	no_overdispersion
UTF1	0	0.968438827837791	1	1026	no_overdispersion
VAX1	0	0.99679807635582	1	1137	no_overdispersion
VCL	0	0.174174321357603	0.97946957474733	3405	no_overdispersion
VDAC2	0	0.999999999999993	1	994	no_overdispersion
VENTX	0	0.422348712570221	1	777	no_overdispersion
VIM	0	0.739232103971949	1	1401	no_overdispersion
VPS26A	0	0.800014692587445	1	1060	no_overdispersion
VSTM4	0	0.0144513273602599	0.420960967859522	1082	no_overdispersion
VTI1A	1	0.999999999999972	1	706	no_overdispersion
VWA2	0	0.383977556565909	1	2324	no_overdispersion
WAC	0	0.0223600589223758	0.509544727348247	2102	no_overdispersion
WAPAL	0	0.20522192540982	1	3573	no_overdispersion
WBP1L	0	0.765270780214569	1	1119	no_overdispersion
WDFY4	0	0.516130636745115	1	9646	no_overdispersion
WDR11	0	0.826033861097849	1	3675	no_overdispersion
WDR37	0	0.584199312770094	1	1509	no_overdispersion
WDR96	0	0.909424738809007	1	5041	no_overdispersion
WNT8B	0	0.184403913401161	0.993381878406195	1056	no_overdispersion
XPNPEP1	0	0.867800516607658	1	2001	no_overdispersion
YME1L1	0	0.997161866423064	1	2394	no_overdispersion
ZCCHC24	0	0.272189267823924	1	933	no_overdispersion
ZDHHC16	0	0.386024967988899	1	1192	no_overdispersion
ZDHHC6	0	0.0458783974108223	0.666371928597374	1242	no_overdispersion
ZEB1	0	0.144514066942476	0.934479535791837	3385	no_overdispersion
ZFAND4	0	0.947472632146309	1	2204	no_overdispersion
ZFYVE27	0	0.77331625454251	1	1277	no_overdispersion
ZMIZ1	0	0.999227924043486	1	3204	no_overdispersion
ZMYND11	0	0.669200756918359	1	1895	no_overdispersion
ZNF22	0	0.318878328553001	1	675	no_overdispersion
ZNF239	0	0.47636674856546	1	1377	no_overdispersion
ZNF248	0	0.820139362059046	1	1770	no_overdispersion
ZNF25	0	0.189467306243864	0.997817560711866	1371	no_overdispersion
ZNF32	0	0.194029632674909	1	822	no_overdispersion
ZNF33A	0	0.287705334704773	1	2496	no_overdispersion
ZNF33B	0	0.567091600879215	1	2337	no_overdispersion
ZNF365	0	0.278432547386767	1	2101	no_overdispersion
ZNF37A	0	0.0989619940163788	0.854789257549265	1686	no_overdispersion
ZNF438	0	0.673494973921932	1	2494	no_overdispersion
ZNF485	0	0.58935357030202	1	1326	no_overdispersion
ZNF487	0	0.187952185683379	0.996478177824824	1420	no_overdispersion
ZNF488	0	0.132635993633576	0.919674033594066	1023	no_overdispersion
ZNF503	0	0.993189010293311	1	1941	no_overdispersion
ZNF511	0	0.551208300402335	1	1316	no_overdispersion
ZRANB1	0	0.978295910860771	1	2127	no_overdispersion
ZSWIM8	0	0.429360690870893	1	5529	no_overdispersion
ZWINT	0	0.9863723245565	1	834	no_overdispersion
AAMDC	0	1	1	874	no_overdispersion
AASDHPPT	0	0.581546226371222	1	930	no_overdispersion
ABCC8	0	0.862421941930699	1	4749	no_overdispersion
ABCG4	0	0.0851610830540014	0.819111795848077	1941	no_overdispersion
ABTB2	0	0.975881960434392	1	3078	no_overdispersion
AC103801.2	0	1	1	63	no_overdispersion
AC131935.1	0	0.495968377878478	1	198	no_overdispersion
AC131971.1	0	1	1	180	no_overdispersion
AC132192.1	0	0.520703925036878	1	264	no_overdispersion
AC132216.1	0	0.0529850131000114	0.70778362624159	369	no_overdispersion
AC136297.1	0	0.0786929649402702	0.806016879196725	222	no_overdispersion
ACAD8	0	0.453525260243983	1	1394	no_overdispersion
ACAT1	0	0.920576438133829	1	1338	no_overdispersion
ACCSL	0	0.991652958278726	1	1707	no_overdispersion
ACCS	0	0.329191107382469	1	1506	no_overdispersion
ACER3	0	0.141964829872113	0.930454310421174	843	no_overdispersion
ACP2	0	0.468314046407026	1	1446	no_overdispersion
ACRV1	0	0.114019698395178	0.893382198209892	798	no_overdispersion
ACY3	0	0.865424707980672	1	960	no_overdispersion
ADAMTS15	0	0.957500601894567	1	2853	no_overdispersion
ADAMTS8	0	0.500584943479617	1	2670	no_overdispersion
ADM	0	0.515818290272832	1	606	no_overdispersion
ADRBK1	0	0.94951011496618	1	2202	no_overdispersion
AGBL2	0	0.539309224307242	1	2856	no_overdispersion
AHNAK	0	0.280945079613654	1	17827	no_overdispersion
AIP	0	0.105705538806128	0.871266733028254	993	no_overdispersion
AKIP1	0	0.450414106880618	1	732	no_overdispersion
AL356215.1	0	1	1	30	no_overdispersion
ALDH3B1	0	0.675190049043198	1	1487	no_overdispersion
ALDH3B2	0	0.104563027937899	0.870622610315928	1158	no_overdispersion
ALG8	0	0.012525879651697	0.399997244731472	1636	no_overdispersion
ALG9	0	0.447224795713463	1	1344	no_overdispersion
ALKBH3	0	0.472946375560114	1	1007	no_overdispersion
ALKBH8	0	0.863333502785594	1	2036	no_overdispersion
ALX4	0	0.9496855260582	1	1236	no_overdispersion
AMBRA1	0	0.295937909105806	1	3897	no_overdispersion
AMICA1	0	0.0746139412490303	0.793355081552362	1198	no_overdispersion
AMOTL1	0	0.406064458946532	1	2871	no_overdispersion
AMPD3	0	0.161375485214092	0.969807719731746	2331	no_overdispersion
ANAPC15	0	0.169088800935776	0.977362919764942	633	no_overdispersion
ANGPTL5	0	0.519263047164273	1	1167	no_overdispersion
ANKK1	0	0.718388709955788	1	2298	no_overdispersion
ANKRD13D	0	0.879388737988763	1	1841	no_overdispersion
ANKRD42	0	0.1358279686334	0.921648512845075	1792	no_overdispersion
ANKRD49	0	0.563063967273817	1	840	no_overdispersion
ANO1	0	0.919385719607208	1	3150	no_overdispersion
ANO3	0	0.983966038770718	1	2976	no_overdispersion
ANO5	0	0.244626348404632	1	2742	no_overdispersion
ANO9	0	0.898858126713236	1	2349	no_overdispersion
AP000679.2	0	0.0971731151942817	0.849423668292564	972	no_overdispersion
AP000708.1	0	0.972022977805696	1	591	no_overdispersion
AP000721.4	0	0.214261273998873	1	495	no_overdispersion
AP000758.1	0	0.999999999999935	1	168	no_overdispersion
AP000769.1	0	0.637017285154916	1	339	no_overdispersion
AP000783.1	0	1	1	408	no_overdispersion
AP000867.1	0	0.568094879844359	1	438	no_overdispersion
AP000889.3	0	0.999999999999985	1	384	no_overdispersion
AP000974.1	0	0.587177933675868	1	597	no_overdispersion
AP001024.1	0	1	1	297	no_overdispersion
AP001024.2	0	0.999999999999968	1	318	no_overdispersion
AP001350.1	0	0.999999999999998	1	171	no_overdispersion
AP001362.1	0	0.241543320222733	1	783	no_overdispersion
AP001652.1	0	0.838902459985953	1	372	no_overdispersion
AP001885.1	0	0.291651055200256	1	276	no_overdispersion
AP001888.1	0	0.387360275290519	1	465	no_overdispersion
AP001925.1	0	1	1	51	no_overdispersion
AP002348.1	0	0.999999999999997	1	123	no_overdispersion
AP002353.1	0	0.999999999999973	1	39	no_overdispersion
AP002884.2	0	0.99999999999997	1	114	no_overdispersion
AP002884.3	0	0.120938151586839	0.90402261144128	618	no_overdispersion
AP002956.1	0	0.999999999999987	1	48	no_overdispersion
AP003041.2	0	0.60629362178594	1	348	no_overdispersion
AP003062.1	0	0.703855565974633	1	1251	no_overdispersion
AP003068.23	0	0.696765464372655	1	759	no_overdispersion
AP003068.6	0	0.999999999999989	1	351	no_overdispersion
AP003733.1	0	0.757037337818726	1	495	no_overdispersion
AP003774.4	0	0.420137676937107	1	384	no_overdispersion
AP006621.5	0	1	1	384	no_overdispersion
AP2A2	0	0.797493628179874	1	2922	no_overdispersion
AP5B1	0	0.854042370517148	1	2637	no_overdispersion
APBB1	0	0.522875177788987	1	2216	no_overdispersion
API5	0	0.802307394062312	1	1793	no_overdispersion
APIP	0	1	1	824	no_overdispersion
APLNR	0	0.000647279857515415	0.0783900687818669	1143	no_overdispersion
APLP2	0	0.461814444918834	1	2427	no_overdispersion
APOA1	0	0.823723378841762	1	895	no_overdispersion
APOA4	0	0.965079825549869	1	1191	no_overdispersion
APOA5	0	0.807599313438854	1	1101	no_overdispersion
APOC3	0	0.242622600045735	1	354	no_overdispersion
AQP11	0	0.893927727727627	1	816	no_overdispersion
ARAP1	0	0.734183058949342	1	4380	no_overdispersion
ARCN1	0	0.0886182031483626	0.832081363425272	1755	no_overdispersion
ARFGAP2	0	0.598102651294952	1	1566	no_overdispersion
ARFIP2	0	0.488969717433452	1	1098	no_overdispersion
ARHGAP1	0	0.595443420415088	1	1320	no_overdispersion
ARHGAP20	0	0.024349744991413	0.526705181055505	3652	no_overdispersion
ARHGAP32	0	0.767017479095625	1	6296	no_overdispersion
ARHGAP42	0	0.921690485570754	1	2625	no_overdispersion
ARHGEF12	1	0.678822350601181	1	4635	no_overdispersion
ARHGEF17	0	0.885551952096359	1	6192	no_overdispersion
ARL14EP	0	0.474326762447022	1	783	no_overdispersion
ARL2	0	0.0702823091553249	0.7749419482028	555	no_overdispersion
ARNTL	0	0.325465914799708	1	2160	no_overdispersion
ARRB1	0	0.644065410930386	1	1281	no_overdispersion
ART1	0	0.300252880728794	1	984	no_overdispersion
ART5	0	0.527703100958567	1	980	no_overdispersion
ASCL2	0	1	1	582	no_overdispersion
ASCL3	0	0.630848290770381	1	546	no_overdispersion
ASRGL1	0	0.24146776182147	1	1067	no_overdispersion
ATG13	0	0.684462464211555	1	1653	no_overdispersion
ATG16L2	0	0.519499627108161	1	1860	no_overdispersion
ATG2A	0	0.426042158118371	1	5823	no_overdispersion
ATHL1	0	0.438997285913181	1	2309	no_overdispersion
ATL3	0	0.741649645310505	1	1782	no_overdispersion
ATM	1	0.0180876011542302	0.467509862853499	9171	no_overdispersion
ATP5L	0	0.350169025307636	1	330	no_overdispersion
B3GAT1	0	0.0760815678045106	0.79534564041458	1044	no_overdispersion
B3GAT3	0	0.692510218576932	1	1063	no_overdispersion
B3GNT1	0	0.925702917975576	1	1248	no_overdispersion
B3GNT6	0	0.9935577131282	1	1158	no_overdispersion
B4GALNT4	0	0.770177138944102	1	3120	no_overdispersion
BACE1	0	0.191424576715397	0.998412658338529	1556	no_overdispersion
BAD	0	0.00162038261355345	0.135652380457142	805	no_overdispersion
BANF1	0	0.432246075652826	1	270	no_overdispersion
BARX2	0	0.00695473241826211	0.302303222225858	962	no_overdispersion
BATF2	0	0.703439257997776	1	894	no_overdispersion
BBOX1	0	0.333895124892028	1	1164	no_overdispersion
BBS1	0	0.154112200707654	0.954514164305753	1819	no_overdispersion
BCL9L	0	0.0839756653488097	0.817923830023611	4500	no_overdispersion
BCO2	0	0.121815514262823	0.905752777059597	1740	no_overdispersion
BDNF	0	0.4066873747428	1	1017	no_overdispersion
BEST1	0	0.0942688957486998	0.842111169325225	2217	no_overdispersion
BET1L	0	0.966524939118606	1	768	no_overdispersion
BIRC2	0	0.429306969555952	1	1857	no_overdispersion
BIRC3	1	0.586510497003716	1	1815	no_overdispersion
BLID	0	0.286241463824884	1	327	no_overdispersion
BRMS1	0	0.392567723578173	1	881	no_overdispersion
BRSK2	0	0.963113476096244	1	2612	no_overdispersion
BSCL2	0	0.822891207900803	1	1395	no_overdispersion
BSX	0	0.660316692122596	1	702	no_overdispersion
BTBD10	0	0.746439300768192	1	1553	no_overdispersion
BTBD18	0	0.672741505358124	1	2139	no_overdispersion
BTG4	0	0.734916539648547	1	783	no_overdispersion
BUD13	0	0.905881508642383	1	1860	no_overdispersion
C11orf16	0	0.120252527411875	0.903264756336997	1415	no_overdispersion
C11orf1	0	0.999999999999922	1	618	no_overdispersion
C11orf21	0	0.385887953421859	1	399	no_overdispersion
C11orf24	0	0.778784197020892	1	1350	no_overdispersion
C11orf30	0	0.951645098332832	1	4066	no_overdispersion
C11orf31	0	0.570620235745877	1	369	no_overdispersion
C11orf34	0	0.999999999999968	1	624	no_overdispersion
C11orf35	0	0.441087594717315	1	1905	no_overdispersion
C11orf40	0	0.670278097868474	1	654	no_overdispersion
C11orf42	0	0.678957241675194	1	1002	no_overdispersion
C11orf44	0	0.723305728680235	1	369	no_overdispersion
C11orf45	0	1	1	438	no_overdispersion
C11orf48	0	0.104135227094174	0.869947042483911	1064	no_overdispersion
C11orf49	0	0.590175200928536	1	1178	no_overdispersion
C11orf52	0	0.999999999999977	1	372	no_overdispersion
C11orf53	0	0.765137034079844	1	711	no_overdispersion
C11orf54	0	0.751727366858579	1	948	no_overdispersion
C11orf57	0	0.999999999999967	1	910	no_overdispersion
C11orf58	0	0.477197725979206	1	552	no_overdispersion
C11orf63	0	0.056497578449408	0.715441786159015	2397	no_overdispersion
C11orf65	0	0.334776899829761	1	1043	no_overdispersion
C11orf68	0	0.87599542661768	1	882	no_overdispersion
C11orf70	0	0.863900123123324	1	855	no_overdispersion
C11orf71	0	0.682222759956517	1	444	no_overdispersion
C11orf72	0	0.712377814475086	1	756	no_overdispersion
C11orf73	0	0.140612755687967	0.92994243245124	640	no_overdispersion
C11orf74	0	0.270196939686867	1	672	no_overdispersion
C11orf80	0	0.241817606533155	1	2046	no_overdispersion
C11orf82	0	0.765404040349885	1	3023	no_overdispersion
C11orf83	0	1	1	282	no_overdispersion
C11orf84	0	0.243630520011143	1	1146	no_overdispersion
C11orf85	0	0.233743925476918	1	765	no_overdispersion
C11orf86	0	0.316924250459232	1	348	no_overdispersion
C11orf87	0	0.785156803228232	1	594	no_overdispersion
C11orf88	0	1	1	595	no_overdispersion
C11orf89	0	0.654856129622032	1	1440	no_overdispersion
C11orf91	0	0.984108085841846	1	641	no_overdispersion
C11orf94	0	0.484220613037434	1	297	no_overdispersion
C11orf96	0	0.998688349576676	1	1844	no_overdispersion
C1QTNF4	0	0.950908411926506	1	990	no_overdispersion
C1QTNF5	0	0.232394950780861	1	732	no_overdispersion
C2CD2L	0	0.717460401733955	1	2144	no_overdispersion
C2CD3	0	0.956545504823512	1	7377	no_overdispersion
CABP2	0	0.774895069864317	1	663	no_overdispersion
CABP4	0	0.0864170051407726	0.822563445867878	879	no_overdispersion
CADM1	0	0.854242419301788	1	1416	no_overdispersion
CALCA	0	0.474745626938085	1	586	no_overdispersion
CALCB	0	1	1	417	no_overdispersion
CAPN1	0	0.4366298613288	1	2145	no_overdispersion
CAPN5	0	0.561875714669921	1	2043	no_overdispersion
CAPRIN1	0	0.0340700969076222	0.606452003470348	2150	no_overdispersion
CARD16	0	0.137748512584323	0.925823859798856	621	no_overdispersion
CARD17	0	0.078123283008554	0.802315700060115	333	no_overdispersion
CARD18	0	0.05343575322368	0.709315368719317	273	no_overdispersion
CARNS1	0	0.575949623279901	1	2853	no_overdispersion
CARS	1	0.236352939121368	1	2615	no_overdispersion
CASP12	0	0.323680200433175	1	1026	no_overdispersion
CASP1	0	0.791113989150204	1	1239	no_overdispersion
CASP4	0	0.98686672664001	1	1134	no_overdispersion
CASP5	0	0.150447666099957	0.94679697410504	1344	no_overdispersion
CATSPER1	0	0.0261628859187275	0.539097501985589	2343	no_overdispersion
CAT	0	0.608595964859213	1	1584	no_overdispersion
CBL	1	0.150565721233253	0.94679697410504	2721	no_overdispersion
CCDC153	0	0.487222339003047	1	633	no_overdispersion
CCDC15	0	0.96916287458303	1	2889	no_overdispersion
CCDC179	0	0.513008891376524	1	207	no_overdispersion
CCDC34	0	0.622678698246332	1	1206	no_overdispersion
CCDC67	0	0.773941612490107	1	1987	no_overdispersion
CCDC73	0	0.00493360825764598	0.249347928108218	3288	no_overdispersion
CCDC81	0	0.180962176532498	0.989102376187846	1959	no_overdispersion
CCDC82	0	0.240063176067944	1	1635	no_overdispersion
CCDC83	0	0.271612739224354	1	1335	no_overdispersion
CCDC84	0	0.425376059115243	1	999	no_overdispersion
CCDC85B	0	0.448218877986633	1	609	no_overdispersion
CCDC86	0	0.957775566780748	1	1083	no_overdispersion
CCDC87	0	0.0559284287169422	0.714163012847108	2550	no_overdispersion
CCDC88B	0	0.996339885857603	1	4897	no_overdispersion
CCDC89	0	0.62596677646122	1	1125	no_overdispersion
CCDC90B	0	0.858067354507897	1	876	no_overdispersion
CCKBR	0	0.617781014317455	1	1672	no_overdispersion
CCND1	1	0.0911651754227815	0.837503046747593	888	no_overdispersion
CCS	0	0.65986019696995	1	825	no_overdispersion
CD151	0	0.353732957723609	1	762	no_overdispersion
CD248	0	0.272483995609023	1	2274	no_overdispersion
CD3D	0	0.0767939498858387	0.796438951196573	516	no_overdispersion
CD3E	0	0.0861712659104461	0.822332091076731	624	no_overdispersion
CD3G	0	0.640359881287095	1	549	no_overdispersion
CD44	0	0.172315164681365	0.979306602017679	2239	no_overdispersion
CD59	0	0.505083831926255	1	595	no_overdispersion
CD5	0	0.690288064749436	1	1488	no_overdispersion
CD6	0	0.435903613934384	1	2007	no_overdispersion
CD81	0	0.999999999999914	1	1090	no_overdispersion
CD82	0	0.793194228376704	1	804	no_overdispersion
CDC42BPG	0	0.76109108267555	1	4656	no_overdispersion
CDC42EP2	0	1	1	633	no_overdispersion
CDCA5	0	0.155900153051443	0.959449820004484	1137	no_overdispersion
CDHR5	0	0.978423414306669	1	2538	no_overdispersion
CDK2AP2	0	0.644050701072085	1	389	no_overdispersion
CDKN1C	0	0.98808850788142	1	961	no_overdispersion
CDON	0	0.727905401038209	1	3864	no_overdispersion
CELF1	0	0.788678425510546	1	1545	no_overdispersion
CEND1	0	1	1	450	no_overdispersion
CEP164	0	0.325547877149051	1	4383	no_overdispersion
CEP57	0	0.256639849825121	1	1527	no_overdispersion
CFL1	0	0.134622163283751	0.919902191693367	618	no_overdispersion
CHEK1	0	0.94643836862013	1	1703	no_overdispersion
CHID1	0	0.603128702669707	1	1347	no_overdispersion
CHKA	0	0.0690976891351969	0.769382818516829	1374	no_overdispersion
CHORDC1	0	0.679192158891371	1	1021	no_overdispersion
CHRDL2	0	0.507836266284837	1	1356	no_overdispersion
CHRM1	0	0.84322326353494	1	1383	no_overdispersion
CHRM4	0	0.690377076143749	1	1440	no_overdispersion
CHRNA10	0	0.704689992188888	1	1353	no_overdispersion
CHST1	0	0.110538119373248	0.881904237272936	1236	no_overdispersion
CKAP5	0	0.127680331704967	0.915684345367167	6120	no_overdispersion
CLCF1	0	0.999999999999924	1	678	no_overdispersion
CLDN25	0	0.217346566677615	1	690	no_overdispersion
CLMP	0	0.102990090272164	0.867231550410441	1122	no_overdispersion
CLNS1A	0	0.857848158148372	1	714	no_overdispersion
CLP1	1	0.588165198732584	1	1311	no_overdispersion
CLPB	0	0.87500725969403	1	2345	no_overdispersion
CNGA4	0	0.940289699109346	1	1832	no_overdispersion
CNIH2	0	0.229023791948856	1	487	no_overdispersion
CNTF	0	0.545351345145105	1	603	no_overdispersion
CNTN5	0	0.00366720591632314	0.217949744212094	3309	no_overdispersion
COA4	0	0.999999999999954	1	291	no_overdispersion
COLCA1	0	1	1	375	no_overdispersion
COLCA2	0	0.666322518110519	1	465	no_overdispersion
COMMD9	0	0.222257509822029	1	597	no_overdispersion
COPB1	0	0.0147588462590165	0.424807688435907	2862	no_overdispersion
CORO1B	0	0.777734992098126	1	1682	no_overdispersion
COX8A	0	0.133443332726785	0.919674033594066	210	no_overdispersion
CPSF7	0	0.671815197584699	1	1545	no_overdispersion
CPT1A	0	0.148437114247029	0.943646441710396	2372	no_overdispersion
CREB3L1	1	0.56722012258594	1	1561	no_overdispersion
CREBZF	0	0.997132375053664	1	1269	no_overdispersion
CRTAM	0	0.569372229885988	1	1237	no_overdispersion
CRY2	0	0.353177480449332	1	1877	no_overdispersion
CRYAB	0	0.661780763578851	1	672	no_overdispersion
CSNK2A3	0	0.772412871541716	1	1176	no_overdispersion
CSRP3	0	0.886109626898608	1	585	no_overdispersion
CST6	0	0.410531143536451	1	450	no_overdispersion
CSTF3	0	0.397016359587234	1	2347	no_overdispersion
CTD-2210P24.4	0	0.75717358683099	1	363	no_overdispersion
CTD-3074O7.11	0	0.263140678044425	1	1893	no_overdispersion
CTNND1	0	0.127404906949987	0.915543774171208	2907	no_overdispersion
CTR9	0	0.662699187072674	1	3522	no_overdispersion
CTSC	0	0.873135706410253	1	1511	no_overdispersion
CTSD	0	0.0565984654557965	0.715441786159015	1239	no_overdispersion
CTSF	0	0.626910915868248	1	1455	no_overdispersion
CTSW	0	0.914897761056189	1	1206	no_overdispersion
CTTN	0	0.365661988510885	1	2063	no_overdispersion
CUL5	0	0.672359571591899	1	2343	no_overdispersion
CWC15	0	0.757466591616907	1	687	no_overdispersion
CWF19L2	0	0.0627170837324903	0.735721890480948	2712	no_overdispersion
CXCR5	0	0.162370888611608	0.971095224663313	1119	no_overdispersion
CYB561A3	0	0.999999999999991	1	867	no_overdispersion
CYB5R2	0	0.683373448711774	1	887	no_overdispersion
CYP2R1	0	0.952577953913496	1	1506	no_overdispersion
DAGLA	0	0.345794953330562	1	3129	no_overdispersion
DAK	0	0.0120132637250473	0.392746020865044	1728	no_overdispersion
DBX1	0	0.89549100627327	1	1149	no_overdispersion
DCDC1	0	0.722512992197952	1	5450	no_overdispersion
DCHS1	0	0.895452407359429	1	9897	no_overdispersion
DCPS	0	0.260994171244196	1	1014	no_overdispersion
DCUN1D5	0	0.742778087925684	1	714	no_overdispersion
DDB1	0	0.0118737285983593	0.390171532235506	3423	no_overdispersion
DDB2	1	0.772864560016279	1	1284	no_overdispersion
DDI1	0	0.00216503624288022	0.15756823704063	1191	no_overdispersion
DDX10	1	0.956248912128495	1	2686	no_overdispersion
DDX25	0	0.189537265796567	0.997817560711866	1452	no_overdispersion
DDX6	1	0.190038109698967	0.997817560711866	1452	no_overdispersion
DEAF1	0	0.575504712693605	1	1740	no_overdispersion
DEFB108B	0	0.999999999999979	1	222	no_overdispersion
DENND5A	0	0.2084209931194	1	3864	no_overdispersion
DEPDC7	0	0.675250031972543	1	1582	no_overdispersion
DGAT2	0	0.0442183302513148	0.659031089256438	1167	no_overdispersion
DGKZ	0	0.339018270711154	1	3926	no_overdispersion
DHCR7	0	0.778404959603136	1	1428	no_overdispersion
DIXDC1	0	0.921543097817223	1	2133	no_overdispersion
DKFZP434E1119	0	1	1	453	no_overdispersion
DKK3	0	0.373076642923327	1	1095	no_overdispersion
DLAT	0	0.605585915889519	1	1944	no_overdispersion
DLG2	0	0.650498331173974	1	3626	no_overdispersion
DNAJB13	0	0.589700419110492	1	1032	no_overdispersion
DNAJC24	0	0.0212886262590912	0.497453746132139	458	no_overdispersion
DNAJC4	0	0.608332722356327	1	821	no_overdispersion
DNHD1	0	0.992900585512753	1	14271	no_overdispersion
DPAGT1	0	0.789915465692756	1	1305	no_overdispersion
DPF2	0	0.240063883326464	1	1218	no_overdispersion
DPP3	0	0.308827720216632	1	2274	no_overdispersion
DRAP1	0	0.898798476224762	1	639	no_overdispersion
DRD2	0	0.0685711553947463	0.765896849351064	1342	no_overdispersion
DRD4	0	1	1	1260	no_overdispersion
DSCAML1	0	0.720891140507405	1	6342	no_overdispersion
DTX4	0	0.291254125105467	1	1860	no_overdispersion
DUSP8	0	0.961757151032467	1	1878	no_overdispersion
DYNC2H1	0	0.988979332829647	1	12945	no_overdispersion
E2F8	0	0.888642455969414	1	2604	no_overdispersion
EED	0	0.443943503737463	1	1405	no_overdispersion
EEF1G	0	0.0804512823861439	0.80957993651514	1476	no_overdispersion
EFCAB4A	0	0.951043988587375	1	1200	no_overdispersion
EFEMP2	0	0.00925567471099254	0.3467456658266	1473	no_overdispersion
EHBP1L1	0	0.995926187391507	1	4670	no_overdispersion
EHD1	0	0.647097170888482	1	1605	no_overdispersion
EHF	0	0.818558493774395	1	1007	no_overdispersion
EI24	0	0.252993440206814	1	1022	no_overdispersion
EIF1AD	0	0.999999999999981	1	498	no_overdispersion
EIF3F	0	0.709456278114379	1	1119	no_overdispersion
EIF3M	0	0.999999999999996	1	1125	no_overdispersion
EIF4G2	0	0.780583847475767	1	2724	no_overdispersion
ELF5	0	0.721651860375655	1	860	no_overdispersion
ELMOD1	0	0.836340165564574	1	1005	no_overdispersion
ELP4	0	0.552613151503134	1	1720	no_overdispersion
EML3	0	0.699673044518836	1	2867	no_overdispersion
ENDOD1	0	0.774547894161077	1	1503	no_overdispersion
EPS8L2	0	0.780789701763455	1	2196	no_overdispersion
ESAM	0	0.901547438486863	1	1279	no_overdispersion
ESRRA	0	0.242231823954457	1	1272	no_overdispersion
ETS1	0	0.165757424946219	0.974434838098196	1544	no_overdispersion
EXPH5	0	0.268984103645992	1	5981	no_overdispersion
EXT2	1	0.997200433730783	1	2349	no_overdispersion
F2	0	0.714537814132862	1	1869	no_overdispersion
FADD	0	0.937186116745794	1	627	no_overdispersion
FADS1	0	0.92533252968156	1	1555	no_overdispersion
FADS2	0	0.394349685385883	1	1807	no_overdispersion
FADS3	0	0.0221558578524258	0.507896665245609	1540	no_overdispersion
FAM111A	0	0.63675978385253	1	1836	no_overdispersion
FAM111B	0	0.674932766799222	1	2205	no_overdispersion
FAM118B	0	0.999999999999969	1	1056	no_overdispersion
FAM160A2	0	0.919965039731086	1	3263	no_overdispersion
FAM168A	0	0.628494376463248	1	735	no_overdispersion
FAM180B	0	0.511351297748147	1	675	no_overdispersion
FAM181B	0	0.993188806511154	1	1281	no_overdispersion
FAM76B	0	0.839347777810088	1	1020	no_overdispersion
FAM86C1	0	0.277440486650776	1	579	no_overdispersion
FAM89B	0	0.99999999999999	1	580	no_overdispersion
FANCF	1	0.996038838145393	1	1125	no_overdispersion
FAR1	0	0.218826850216391	1	1548	no_overdispersion
FAT3	0	0.998593072133546	1	13928	no_overdispersion
FAU	0	0.115210583286041	0.894859973417088	410	no_overdispersion
FBXO3	0	0.683095562375272	1	1479	no_overdispersion
FCHSD2	0	0.983550804042811	1	2306	no_overdispersion
FDX1	0	0.816691539346731	1	555	no_overdispersion
FDXACB1	0	0.265168628640465	1	1875	no_overdispersion
FEN1	0	0.597296090708038	1	1143	no_overdispersion
FERMT3	0	0.409153706491609	1	2004	no_overdispersion
FEZ1	0	0.836662362644199	1	1183	no_overdispersion
FGF19	0	0.835887985157486	1	651	no_overdispersion
FGF3	0	0.22446609859115	1	720	no_overdispersion
FGF4	0	0.974448376061457	1	621	no_overdispersion
FIBIN	0	0.637572616680764	1	636	no_overdispersion
FIBP	0	0.234760827706802	1	1114	no_overdispersion
FJX1	0	0.994504759878777	1	1314	no_overdispersion
FKBP2	0	0.25106863227706	1	429	no_overdispersion
FLI1	1	0.517631043841073	1	1391	no_overdispersion
FLRT1	0	0.0473448908325224	0.672622362296209	2025	no_overdispersion
FNBP4	0	0.296990970764734	1	3054	no_overdispersion
FOLH1	0	0.0332146101858431	0.601444125089932	2326	no_overdispersion
FOLR1	0	0.0546388286587626	0.71042888351427	774	no_overdispersion
FOLR2	0	0.235222368685483	1	819	no_overdispersion
FOLR3	0	0.64564363227414	1	864	no_overdispersion
FOLR4	0	0.714495305070906	1	732	no_overdispersion
FOSL1	0	0.7459224554398	1	816	no_overdispersion
FOXR1	0	0.0409885475339367	0.645180611606859	879	no_overdispersion
FOXRED1	0	0.599636650393342	1	1504	no_overdispersion
FRMD8	0	0.577405629313641	1	1511	no_overdispersion
FSHB	0	1	1	390	no_overdispersion
FTH1	0	0.474203234901447	1	747	no_overdispersion
FUT4	0	0.999949460319478	1	1593	no_overdispersion
FXYD2	0	0.999999999999979	1	220	no_overdispersion
FXYD6-FXYD2	0	0.582170682590446	1	339	no_overdispersion
FXYD6	0	0.367841319107168	1	378	no_overdispersion
FZD4	0	0.977901839643969	1	1614	no_overdispersion
GAB2	0	0.248823192465083	1	2031	no_overdispersion
GAL3ST3	0	0.68728778086249	1	1296	no_overdispersion
GALNT18	0	0.000809864898635876	0.0898159547863142	1824	no_overdispersion
GAL	0	0.656708061482266	1	372	no_overdispersion
GANAB	0	0.63621878494704	1	2901	no_overdispersion
GAS2	0	0.963883865587869	1	942	no_overdispersion
GDPD4	0	0.983721051950822	1	1895	no_overdispersion
GDPD5	0	0.296936339364456	1	1851	no_overdispersion
GIF	0	0.885306268936262	1	1258	no_overdispersion
GLB1L2	0	0.532911513905478	1	1911	no_overdispersion
GLB1L3	0	0.68995279529795	1	2028	no_overdispersion
GLYATL1	0	0.221917110271205	1	1080	no_overdispersion
GLYATL2	0	0.135698917703295	0.921648512845075	885	no_overdispersion
GLYAT	0	0.0130465771197929	0.405907924147705	895	no_overdispersion
GNG3	0	0.297300402354985	1	228	no_overdispersion
GPHA2	0	0.263513464681828	1	459	no_overdispersion
GPR137	0	0.17090770105621	0.978990099058503	1534	no_overdispersion
GPR152	0	0.192436871214855	0.999790917078751	1413	no_overdispersion
GPR83	0	0.569432853787745	1	1272	no_overdispersion
GRAMD1B	0	0.455212473389974	1	2407	no_overdispersion
GRIA4	0	0.852099242639973	1	2976	no_overdispersion
GRIK4	0	0.979099477358858	1	2871	no_overdispersion
GRM5	0	0.713101604166931	1	3875	no_overdispersion
GSTP1	0	0.0902218685970985	0.835567667819645	633	no_overdispersion
GTF2H1	0	0.295225513526465	1	1752	no_overdispersion
GUCY1A2	0	0.0866349807912426	0.823823797588231	2355	no_overdispersion
GYLTL1B	0	0.579632583917571	1	2251	no_overdispersion
H2AFX	0	0.427263570995817	1	432	no_overdispersion
HARBI1	0	0.00703131865143198	0.302959471336179	1050	no_overdispersion
HBB	0	0.583635541365386	1	444	no_overdispersion
HBD	0	0.268041260640465	1	555	no_overdispersion
HBE1	0	0.61060313782026	1	444	no_overdispersion
HBG1	0	0.821891881886276	1	444	no_overdispersion
HBG2	0	0.948829271515521	1	506	no_overdispersion
HEPACAM	0	0.674362701465613	1	1251	no_overdispersion
HEPHL1	0	0.171758487998621	0.979306602017679	3480	no_overdispersion
HEPN1	0	0.352737540413699	1	267	no_overdispersion
HINFP	0	0.849881399331252	1	1616	no_overdispersion
HIPK3	0	0.436314552133483	1	3648	no_overdispersion
HMBS	0	1	1	1086	no_overdispersion
HNRNPUL2	0	0.920044112360072	1	2244	no_overdispersion
HPS5	0	0.166627238652637	0.974954149952956	3597	no_overdispersion
HPX	0	0.832946635471244	1	1389	no_overdispersion
HRASLS2	0	0.505037663017815	1	489	no_overdispersion
HRASLS5	0	0.205166652804515	1	840	no_overdispersion
HRAS	1	0.00705597023920733	0.302959471336179	633	no_overdispersion
HSD17B12	0	0.427069780681056	1	953	no_overdispersion
HSPA8	0	0.00619371211345084	0.284644678894056	1941	no_overdispersion
HSPB2	0	0.208941511619489	1	549	no_overdispersion
HTATIP2	0	0.737560163817834	1	930	no_overdispersion
HTR3A	0	0.852995660744631	1	1573	no_overdispersion
HTR3B	0	0.812750713353306	1	1345	no_overdispersion
HYLS1	0	0.624570886859904	1	900	no_overdispersion
HYOU1	0	0.906595873462448	1	3135	no_overdispersion
IFITM10	0	0.0859427143385713	0.822332091076731	687	no_overdispersion
IFITM1	0	1	1	378	no_overdispersion
IFITM2	0	0.688803207122723	1	399	no_overdispersion
IFITM3	0	0.0724891939983384	0.785070772870586	402	no_overdispersion
IFITM5	0	0.999999999999953	1	399	no_overdispersion
IFT46	0	0.645482729686647	1	1068	no_overdispersion
IGF2	0	0.955511615968378	1	720	no_overdispersion
IGHMBP2	0	0.426396405945965	1	2982	no_overdispersion
IGSF22	0	0.75965056991354	1	3981	no_overdispersion
IGSF9B	0	0.865485996729316	1	4381	no_overdispersion
IL10RA	0	0.79410185885848	1	1744	no_overdispersion
IL18BP	0	1	1	713	no_overdispersion
IL18	0	1	1	582	no_overdispersion
ILK	0	0.467775223761347	1	1359	no_overdispersion
IMMP1L	0	0.120766556681253	0.903996175499399	501	no_overdispersion
INCENP	0	0.6293865667395	1	2757	no_overdispersion
INPPL1	0	0.0234867366830667	0.517654037734734	3777	no_overdispersion
INS-IGF2	0	0.999999999999839	1	603	no_overdispersion
INSC	0	0.46393574234917	1	1819	no_overdispersion
INS	0	0.323940133247527	1	333	no_overdispersion
INTS4	0	0.928009372711401	1	2988	no_overdispersion
INTS5	0	0.0668821631323992	0.760365258882993	3060	no_overdispersion
IPO7	0	0.296116223077651	1	3117	no_overdispersion
IRF7	0	0.494696203768884	1	1571	no_overdispersion
JAM3	0	0.889066048064812	1	1068	no_overdispersion
JRKL	0	0.554126461871029	1	1575	no_overdispersion
KAT5	0	0.0841352047959454	0.818236112904406	1641	no_overdispersion
KBTBD3	0	0.233075987681427	1	1882	no_overdispersion
KBTBD4	0	0.621984096899746	1	1787	no_overdispersion
KBTBD4	0	0.999999999999993	1	84	no_overdispersion
KCNA4	0	0.906923293228678	1	1962	no_overdispersion
KCNC1	0	0.89472275922214	1	1790	no_overdispersion
KCNE3	0	0.154716680528816	0.955504049930432	312	no_overdispersion
KCNJ11	0	0.768542374357795	1	1173	no_overdispersion
KCNJ1	0	0.326221206692929	1	1176	no_overdispersion
KCNJ5	1	0.14918159244223	0.943852294406328	1260	no_overdispersion
KCNK4	0	0.987793998288009	1	1280	no_overdispersion
KCNK7	0	0.462809869163311	1	1021	no_overdispersion
KCNQ1	0	0.608956022004017	1	2036	no_overdispersion
KCTD14	0	0.453621951455744	1	768	no_overdispersion
KCTD21	0	0.141646285366051	0.930449114439398	783	no_overdispersion
KDELC2	0	0.957886909175761	1	1663	no_overdispersion
KDM2A	0	0.238387536512336	1	3651	no_overdispersion
KDM4D	0	0.696771447081438	1	1572	no_overdispersion
KDM4E	0	0.896068569654742	1	1521	no_overdispersion
KIAA1377	0	0.27231895266392	1	3354	no_overdispersion
KIAA1549L	0	0.949770405489919	1	5568	no_overdispersion
KIAA1731	0	0.833379078057577	1	7809	no_overdispersion
KIF18A	0	0.355808947935667	1	2697	no_overdispersion
KIRREL3	0	0.243254113744951	1	2444	no_overdispersion
KLC2	0	0.266650233329284	1	2317	no_overdispersion
KLHL35	0	0.939666022626427	1	1752	no_overdispersion
KMT2A	1	0.857270504318235	1	11919	no_overdispersion
KRTAP5-10	0	0.0634529528746594	0.741918394947706	681	no_overdispersion
KRTAP5-11	0	0.668351849258702	1	471	no_overdispersion
KRTAP5-1	0	0.209204336005684	1	837	no_overdispersion
KRTAP5-2	0	0.00272580949214399	0.182885671012978	534	no_overdispersion
KRTAP5-3	0	0.133479136812937	0.919674033594066	717	no_overdispersion
KRTAP5-4	0	0.00123827074286169	0.11574825934245	687	no_overdispersion
KRTAP5-5	0	0.00717976670283709	0.304035800419705	714	no_overdispersion
KRTAP5-6	0	0.265679288750324	1	390	no_overdispersion
KRTAP5-7	0	0.747427860492213	1	498	no_overdispersion
KRTAP5-8	0	3.66662700341076e-08	2.94185706573657e-05	564	no_overdispersion
KRTAP5-9	0	0.943966851308045	1	510	no_overdispersion
LAMTOR1	0	0.51220100602488	1	646	no_overdispersion
LAYN	0	0.0986089055821724	0.854071003864145	1153	no_overdispersion
LDHAL6A	0	0.136369204543735	0.923321168317216	999	no_overdispersion
LDHA	0	0.256867616502309	1	1181	no_overdispersion
LDHC	0	0.176641886353252	0.981933072638054	999	no_overdispersion
LDLRAD3	0	0.823094048958222	1	1155	no_overdispersion
LGALS12	0	0.630003973147591	1	1014	no_overdispersion
LGR4	0	0.426188033333658	1	2860	no_overdispersion
LIN7C	0	0.999999999999975	1	594	no_overdispersion
LIPT2	0	0.894817306114011	1	696	no_overdispersion
LMO1	1	0.459355827322807	1	493	no_overdispersion
LMO2	1	0.567151129359757	1	684	no_overdispersion
LPXN	0	0.577377147530003	1	1189	no_overdispersion
LRFN4	0	0.532875964749352	1	2033	no_overdispersion
LRP4	0	0.714225249112527	1	5718	no_overdispersion
LRP5	0	0.582548890975734	1	4848	no_overdispersion
LRRC10B	0	0.996083552513131	1	879	no_overdispersion
LRRC32	0	0.0112197049407095	0.380169777721188	1989	no_overdispersion
LRRC4C	0	0.0395303535039694	0.638294502864829	1923	no_overdispersion
LRRC55	0	0.0429125846267107	0.654506401132483	1026	no_overdispersion
LRRC56	0	0.723227478493244	1	1629	no_overdispersion
LRRN4CL	0	0.540031367286359	1	717	no_overdispersion
LRTOMT	0	0.0671165561648111	0.760365258882993	1603	no_overdispersion
LSP1	0	0.346280818449464	1	1457	no_overdispersion
LTBP3	0	0.972572133778039	1	3922	no_overdispersion
LUZP2	0	0.513605338825853	1	1041	no_overdispersion
LYVE1	0	0.942269907655438	1	969	no_overdispersion
MACROD1	0	0.826816958875558	1	978	no_overdispersion
MADD	0	0.481554301185986	1	5112	no_overdispersion
MAML2	1	0.26032801119968	1	3471	no_overdispersion
MAP3K11	0	0.366396444472936	1	2544	no_overdispersion
MAP4K2	0	0.529812070730551	1	2463	no_overdispersion
MAP6	0	0.839459132285542	1	2446	no_overdispersion
MAPK8IP1	0	0.345979531845276	1	2207	no_overdispersion
MARK2	0	0.189419336914911	0.997817560711866	2367	no_overdispersion
MCAM	0	0.576513864435354	1	2439	no_overdispersion
MDK	0	1	1	432	no_overdispersion
ME3	0	0.167330338182724	0.975511048152144	1862	no_overdispersion
MED17	0	0.688947304697567	1	1977	no_overdispersion
MED19	0	0.805670233298689	1	749	no_overdispersion
MEN1	1	0.943761022991145	1	1848	no_overdispersion
METTL12	0	0.700384188661811	1	723	no_overdispersion
METTL15	0	0.668072540155935	1	1310	no_overdispersion
MFRP	0	0.677602841890059	1	1740	no_overdispersion
MICAL2	0	0.965642776771452	1	3650	no_overdispersion
MICALCL	0	0.0669076982531919	0.760365258882993	2088	no_overdispersion
MMP10	0	0.940535742252589	1	1431	no_overdispersion
MMP13	0	0.10736742739211	0.875674367582579	1534	no_overdispersion
MMP1	0	0.250533441857943	1	1410	no_overdispersion
MMP20	0	0.368169004130697	1	1452	no_overdispersion
MMP26	0	0.25755259654208	1	786	no_overdispersion
MMP27	0	0.985081437727021	1	1542	no_overdispersion
MMP3	0	0.538295011326818	1	1434	no_overdispersion
MMP7	0	0.399777360758514	1	804	no_overdispersion
MMP8	0	0.843617805581315	1	1404	no_overdispersion
MOB2	0	0.516779520936965	1	807	no_overdispersion
MOGAT2	0	0.903541407684819	1	1005	no_overdispersion
MPEG1	0	0.547703088901309	1	2151	no_overdispersion
MPPED2	0	0.708286380624175	1	953	no_overdispersion
MPZL2	0	0.526733278404213	1	648	no_overdispersion
MPZL3	0	0.0843411368637533	0.819111795848077	742	no_overdispersion
MRE11A	0	0.303487478883218	1	2163	no_overdispersion
MRGPRD	0	0.0550108017089873	0.710494567381215	966	no_overdispersion
MRGPRE	0	0.488414647443378	1	939	no_overdispersion
MRGPRF	0	0.617341893184837	1	1299	no_overdispersion
MRGPRG	0	0.863958763191233	1	870	no_overdispersion
MRGPRX1	0	0.806277805817637	1	969	no_overdispersion
MRGPRX2	0	0.752887722376558	1	993	no_overdispersion
MRGPRX3	0	0.269742774667505	1	969	no_overdispersion
MRGPRX4	0	0.37555784398096	1	969	no_overdispersion
MRPL11	0	0.029662111438533	0.57475754839058	652	no_overdispersion
MRPL16	0	0.827305540622203	1	756	no_overdispersion
MRPL17	0	0.999999999999994	1	528	no_overdispersion
MRPL21	0	0.837671396702831	1	908	no_overdispersion
MRPL23	0	0.588567255621043	1	940	no_overdispersion
MRPL48	0	0.109232680393651	0.875808198393551	697	no_overdispersion
MRPL49	0	0.999999999999965	1	641	no_overdispersion
MRVI1	0	0.471245145604285	1	2784	no_overdispersion
MS4A10	0	0.0828914561972284	0.81383510860832	804	no_overdispersion
MS4A12	0	0.987684578214027	1	804	no_overdispersion
MS4A13	0	0.82445161157337	1	459	no_overdispersion
MS4A14	0	0.19279548151471	0.999790917078751	2184	no_overdispersion
MS4A15	0	0.275431813083031	1	723	no_overdispersion
MS4A18	0	0.0935524025785298	0.842111169325225	969	no_overdispersion
MS4A1	0	0.942907144626686	1	894	no_overdispersion
MS4A2	0	0.892095347085042	1	735	no_overdispersion
MS4A3	0	0.339936796735936	1	645	no_overdispersion
MS4A4A	0	0.289504312874352	1	720	no_overdispersion
MS4A4E	0	0.00592259142687662	0.277482774977947	799	no_overdispersion
MS4A5	0	0.535936257544162	1	603	no_overdispersion
MS4A6A	0	0.532089826730471	1	1002	no_overdispersion
MS4A6E	0	0.696390313913599	1	444	no_overdispersion
MS4A7	0	0.0151816224581414	0.430540975042667	738	no_overdispersion
MS4A8	0	0.693616650992486	1	753	no_overdispersion
MSANTD2	0	0.999561891696229	1	1680	no_overdispersion
MSANTD4	0	0.940727814154189	1	1038	no_overdispersion
MTA2	0	0.0984264878413889	0.854071003864145	2007	no_overdispersion
MTCH2	0	0.299621131754233	1	912	no_overdispersion
MTL5	0	0.646666039696995	1	1531	no_overdispersion
MTMR2	0	0.964445610303233	1	1932	no_overdispersion
MTNR1B	0	0.0115464590517009	0.38351935055781	1089	no_overdispersion
MTRNR2L8	0	0.229830832529884	1	75	no_overdispersion
MUC15	0	0.443487029128135	1	1086	no_overdispersion
MUC2	0	0.791787748800017	1	8501	no_overdispersion
MUC5AC	0	0.0225687331180973	0.510974058365998	1860	no_overdispersion
MUC5B	0	0.973224795550418	1	17298	no_overdispersion
MUC6	0	0.979881592217582	1	7320	no_overdispersion
MUS81	0	0.629865107076718	1	1656	no_overdispersion
MYBPC3	0	0.591906965077089	1	3828	no_overdispersion
MYEOV	0	0.814021544459179	1	942	no_overdispersion
MYO7A	0	0.686431850712973	1	6682	no_overdispersion
MYOD1	1	0.998806172738386	1	963	no_overdispersion
MYRF	0	0.45390302001131	1	3675	no_overdispersion
NAA40	0	0.699761268167398	1	714	no_overdispersion
NAALAD2	0	0.616352427690429	1	2343	no_overdispersion
NAALADL1	0	0.540630810239324	1	2380	no_overdispersion
NADSYN1	0	0.872593440514055	1	2139	no_overdispersion
NAP1L4	0	0.939541964952941	1	1167	no_overdispersion
NARS2	0	0.985645448433461	1	1434	no_overdispersion
NAT10	0	0.877917889440232	1	3078	no_overdispersion
NAV2	0	0.109916339553225	0.879061942157025	7679	no_overdispersion
NCAM1	0	0.730621583251814	1	2830	no_overdispersion
NCAPD3	0	0.75960439548596	1	4547	no_overdispersion
NCR3LG1	0	0.976839738111851	1	1365	no_overdispersion
NDUFC2-KCTD14	0	0.162829308410795	0.971169963424002	345	no_overdispersion
NDUFC2	0	0.175710178548126	0.980149246269616	412	no_overdispersion
NDUFS3	0	0.649666780193139	1	1124	no_overdispersion
NDUFS8	0	0.672755508988799	1	633	no_overdispersion
NDUFV1	0	0.879838874265834	1	1395	no_overdispersion
NELL1	0	0.191051914503793	0.998412658338529	2517	no_overdispersion
NEU3	0	0.947582532460166	1	1777	no_overdispersion
NFRKB	0	0.997665782404925	1	4007	no_overdispersion
NLRP10	0	0.0763923033835636	0.795570683587832	1968	no_overdispersion
NLRP14	0	0.149457741732637	0.944832000920439	3282	no_overdispersion
NLRP6	0	0.968937760919573	1	2679	no_overdispersion
NLRX1	0	0.309823074974229	1	3088	no_overdispersion
NNMT	0	0.00602701694754047	0.279653586365878	795	no_overdispersion
NOX4	0	0.542493594510917	1	1947	no_overdispersion
NPAS4	0	0.0020377217688843	0.151531362059713	2409	no_overdispersion
NPAT	0	0.742971082959955	1	4284	no_overdispersion
NR1H3	0	0.262374402647335	1	1536	no_overdispersion
NRGN	0	0.999999999999968	1	237	no_overdispersion
NRIP3	0	0.0766351529473999	0.796438951196573	726	no_overdispersion
NRXN2	0	0.988549742509402	1	5404	no_overdispersion
NTM	0	0.0860082134787306	0.822332091076731	1222	no_overdispersion
NUCB2	0	1	1	1271	no_overdispersion
NUDT22	0	0.752252697657436	1	912	no_overdispersion
NUDT8	0	0.933337965834959	1	729	no_overdispersion
NUMA1	1	0.735911581446101	1	6348	no_overdispersion
NUP160	0	0.678892279902083	1	4475	no_overdispersion
NUP98	1	0.321739668162861	1	5495	no_overdispersion
NXF1	0	0.463065979693558	1	1915	no_overdispersion
NXPE1	0	0.42911159162303	1	1681	no_overdispersion
NXPE2	0	0.333628040529245	1	1856	no_overdispersion
NXPE4	0	0.258259651845371	1	1635	no_overdispersion
OAF	0	0.688100482609311	1	822	no_overdispersion
ODF3	0	0.600978481408392	1	872	no_overdispersion
OLFML1	0	0.775894194885484	1	1209	no_overdispersion
OMP	0	0.560422327045785	1	492	no_overdispersion
OOSP1	0	0.511257541654062	1	369	no_overdispersion
OPCML	0	0.138623730322009	0.928423995391654	1126	no_overdispersion
OR10A2	0	0.573671512598707	1	912	no_overdispersion
OR10A3	0	0.191680099135917	0.998645018658338	945	no_overdispersion
OR10A4	0	0.0464278179568085	0.668114669604177	948	no_overdispersion
OR10A5	0	0.802636231322281	1	966	no_overdispersion
OR10A6	0	0.170375657512259	0.978421012316699	945	no_overdispersion
OR10AG1	0	0.0602956271898107	0.729040439244171	906	no_overdispersion
OR10D3	0	0.317564489799998	1	939	no_overdispersion
OR10G4	0	0.228097621760619	1	936	no_overdispersion
OR10G6	0	0.11551314493699	0.895355651433146	999	no_overdispersion
OR10G7	0	0.95024146077364	1	936	no_overdispersion
OR10G8	0	0.288065013051195	1	936	no_overdispersion
OR10G9	0	0.1487706528377	0.943852294406328	936	no_overdispersion
OR10Q1	0	0.283095013387412	1	960	no_overdispersion
OR10S1	0	0.906550326535616	1	996	no_overdispersion
OR10V1	0	0.298117162080407	1	930	no_overdispersion
OR10W1	0	0.660481121648829	1	918	no_overdispersion
OR1S1	0	0.306985982425866	1	978	no_overdispersion
OR1S2	0	0.395605725649054	1	978	no_overdispersion
OR2AG1	0	0.264519327141733	1	951	no_overdispersion
OR2AG2	0	0.246132876541785	1	951	no_overdispersion
OR2AT4	0	0.999999999999996	1	963	no_overdispersion
OR2D2	0	0.473753728543077	1	927	no_overdispersion
OR2D3	0	0.872376780824462	1	993	no_overdispersion
OR4A15	0	7.50230982013041e-05	0.0164164179427763	1035	no_overdispersion
OR4A16	0	0.00491293231082083	0.249195097603557	987	no_overdispersion
OR4A47	0	0.173408561568629	0.97946957474733	930	no_overdispersion
OR4A5	0	0.157595140525867	0.962508848284857	948	no_overdispersion
OR4B1	0	0.205825921600933	1	930	no_overdispersion
OR4C11	0	0.195207968058099	1	933	no_overdispersion
OR4C12	0	0.0208870702453122	0.492955879907365	930	no_overdispersion
OR4C13	0	0.0620632053943493	0.730820570487309	930	no_overdispersion
OR4C15	0	0.025096095097252	0.530461478806459	1113	no_overdispersion
OR4C16	0	0.0726659897667379	0.785824152954611	933	no_overdispersion
OR4C3	0	0.00855129681677529	0.335364096749134	990	no_overdispersion
OR4C46	0	0.00328634479597742	0.206425260531461	930	no_overdispersion
OR4C5	0	3.25449267353768e-05	0.00895264441737737	981	no_overdispersion
OR4C6	0	0.713235320358318	1	930	no_overdispersion
OR4D10	0	0.671766261969917	1	936	no_overdispersion
OR4D11	0	0.0666906018174394	0.760365258882993	936	no_overdispersion
OR4D5	0	0.0288893699680909	0.566652171621187	957	no_overdispersion
OR4D6	0	0.0236795382557136	0.518769634605221	945	no_overdispersion
OR4D9	0	0.667717356173946	1	945	no_overdispersion
OR4P4	0	0.000630076457322419	0.0777740529628237	939	no_overdispersion
OR4S1	0	0.36576059617682	1	930	no_overdispersion
OR4S2	0	0.144340762797957	0.934479535791837	936	no_overdispersion
OR4X1	0	0.276405384765688	1	918	no_overdispersion
OR4X2	0	0.000695920843599905	0.0827200726195048	912	no_overdispersion
OR51A2	0	0.840933363768619	1	942	no_overdispersion
OR51A4	0	0.0493860959856994	0.685448449918591	942	no_overdispersion
OR51A7	0	0.51872384930731	1	939	no_overdispersion
OR51B2	0	0.0994630555521991	0.855791151793184	939	no_overdispersion
OR51B4	0	0.292671631372357	1	933	no_overdispersion
OR51B5	0	0.693206425881647	1	939	no_overdispersion
OR51B6	0	0.112413013679343	0.887571685020642	939	no_overdispersion
OR51D1	0	0.879493566988803	1	975	no_overdispersion
OR51E1	0	0.994421179938149	1	957	no_overdispersion
OR51E2	0	0.0359025434040435	0.621891119251424	963	no_overdispersion
OR51F1	0	0.341542269268721	1	960	no_overdispersion
OR51F2	0	0.875592404014802	1	1029	no_overdispersion
OR51G1	0	0.636689984199941	1	966	no_overdispersion
OR51G2	0	0.835450741517651	1	945	no_overdispersion
OR51H1P	0	0.147761465272858	0.941266788344293	909	no_overdispersion
OR51I1	0	0.218319616862934	1	945	no_overdispersion
OR51I2	0	0.574405518982728	1	939	no_overdispersion
OR51J1	0	0.104698564153108	0.870622610315928	951	no_overdispersion
OR51L1	0	0.0891290342595552	0.833541702945621	948	no_overdispersion
OR51M1	0	0.0952372046250523	0.843942757597794	981	no_overdispersion
OR51Q1	0	0.128262601781567	0.915872739547107	954	no_overdispersion
OR51S1	0	0.0627025310570027	0.735721890480948	972	no_overdispersion
OR51T1	0	0.496500628245573	1	1065	no_overdispersion
OR51V1	0	0.0534838220425172	0.709315368719317	966	no_overdispersion
OR52A1	0	0.420054342543925	1	939	no_overdispersion
OR52A5	0	0.0913231166982831	0.838009408127352	951	no_overdispersion
OR52B1P	0	0.0700901869390598	0.774774190412477	813	no_overdispersion
OR52B2	0	0.120372652615318	0.903310911442152	972	no_overdispersion
OR52B4	0	0.614044713163712	1	945	no_overdispersion
OR52B6	0	0.384867783978439	1	1008	no_overdispersion
OR52D1	0	0.802791329271107	1	957	no_overdispersion
OR52E2	0	0.344174462771275	1	978	no_overdispersion
OR52E4	0	0.00173583750066352	0.141034965876695	939	no_overdispersion
OR52E6	0	0.367962437297559	1	954	no_overdispersion
OR52E8	0	0.586324175213893	1	954	no_overdispersion
OR52H1	0	0.247389798727223	1	963	no_overdispersion
OR52I1	0	0.743720312310992	1	1047	no_overdispersion
OR52I2	0	0.0749815251191372	0.793456803687179	1053	no_overdispersion
OR52J3	0	0.00874955807757641	0.338316245666288	936	no_overdispersion
OR52K1	0	0.63287736343092	1	945	no_overdispersion
OR52K2	0	0.526979843994038	1	945	no_overdispersion
OR52L1	0	0.0823279084192861	0.812560842912236	990	no_overdispersion
OR52M1	0	0.62375963132527	1	954	no_overdispersion
OR52N1	0	0.474622199697685	1	963	no_overdispersion
OR52N2	0	0.92346079095897	1	966	no_overdispersion
OR52N4	0	0.00262530147570849	0.17800283526846	966	no_overdispersion
OR52N5	0	0.334410793372385	1	975	no_overdispersion
OR52R1	0	0.220520249105433	1	1185	no_overdispersion
OR52W1	0	0.981652259385073	1	963	no_overdispersion
OR56A1	0	0.469980533296734	1	957	no_overdispersion
OR56A3	0	0.490448495348014	1	948	no_overdispersion
OR56A4	0	0.265715438508398	1	1098	no_overdispersion
OR56B1	0	0.108810306053694	0.875808198393551	975	no_overdispersion
OR56B3P	0	0.000969021157261476	0.100214628018274	867	no_overdispersion
OR56B4	0	0.278022635494409	1	960	no_overdispersion
OR5A1	0	0.296824443058667	1	948	no_overdispersion
OR5A2	0	0.334159146587818	1	975	no_overdispersion
OR5AK2	0	0.00172037524212212	0.140370956196201	930	no_overdispersion
OR5AN1	0	0.491091261659204	1	936	no_overdispersion
OR5AP2	0	0.828513396723022	1	954	no_overdispersion
OR5AR1	0	0.990604110211776	1	933	no_overdispersion
OR5AS1	0	0.0200235730489615	0.48656213234555	975	no_overdispersion
OR5B12	0	0.650805643164278	1	945	no_overdispersion
OR5B17	0	0.166835525847663	0.97505897755112	945	no_overdispersion
OR5B21	0	0.374060732690484	1	930	no_overdispersion
OR5B2	0	0.195952847595317	1	930	no_overdispersion
OR5B3	0	0.0984835727292865	0.854071003864145	945	no_overdispersion
OR5D13	0	0.133189401153756	0.919674033594066	945	no_overdispersion
OR5D14	0	0.0964292314433898	0.847872730901331	945	no_overdispersion
OR5D16	0	0.313538313903003	1	987	no_overdispersion
OR5D18	0	0.000154246382093152	0.0300017003392498	942	no_overdispersion
OR5F1	0	1.63169192277745e-05	0.0055122560815794	945	no_overdispersion
OR5I1	0	0.0933573473681748	0.841614738259164	945	no_overdispersion
OR5J2	0	0.0100980952483728	0.362777839743781	939	no_overdispersion
OR5L1	0	0.426991384510451	1	936	no_overdispersion
OR5L2	0	0.0641726168539487	0.744851060964217	936	no_overdispersion
OR5M10	0	0.568036407254393	1	948	no_overdispersion
OR5M11	0	0.00251669743985491	0.17277718746562	918	no_overdispersion
OR5M1	0	0.5479814065383	1	948	no_overdispersion
OR5M3	0	0.0129724005559833	0.404856637124821	924	no_overdispersion
OR5M8	0	0.870530187625935	1	936	no_overdispersion
OR5M9	0	0.212809984575047	1	933	no_overdispersion
OR5P2	0	0.945521005423277	1	969	no_overdispersion
OR5P3	0	0.880857387879317	1	936	no_overdispersion
OR5R1	0	0.924173833207899	1	975	no_overdispersion
OR5T1	0	0.0121241637256124	0.394363001183095	981	no_overdispersion
OR5T2	0	0.0810373776682369	0.809785025625101	1080	no_overdispersion
OR5T3	0	0.00743279080384827	0.311331888062011	1023	no_overdispersion
OR5W2	0	0.00508611760339911	0.25372611546905	933	no_overdispersion
OR6A2	0	0.00310148854527387	0.19775583916488	984	no_overdispersion
OR6M1	0	0.13078891767748	0.91678303370416	942	no_overdispersion
OR6Q1	0	0.128544510204526	0.915872739547107	954	no_overdispersion
OR6T1	0	0.0218281470922957	0.504375525519061	972	no_overdispersion
OR6X1	0	0.514430712400754	1	939	no_overdispersion
OR8A1	0	0.39079864413848	1	981	no_overdispersion
OR8B12	0	0.324599817907408	1	933	no_overdispersion
OR8B2	0	0.56430488445336	1	942	no_overdispersion
OR8B3	0	0.316204971013159	1	942	no_overdispersion
OR8B4	0	0.138691515141311	0.928423995391654	930	no_overdispersion
OR8B8	0	0.203016014957853	1	936	no_overdispersion
OR8D1	0	0.0848447868485123	0.819111795848077	927	no_overdispersion
OR8D2	0	0.11665578953219	0.897452610160548	936	no_overdispersion
OR8D4	0	0.0439088095559454	0.658395910891922	945	no_overdispersion
OR8G1	0	0.294932522744855	1	936	no_overdispersion
OR8G5	0	0.0263991017525085	0.539097501985589	1041	no_overdispersion
OR8H1	0	0.000934811935487403	0.098364691965822	936	no_overdispersion
OR8H2	0	6.08350279194179e-06	0.00234287859523262	939	no_overdispersion
OR8H3	0	0.406071229087135	1	939	no_overdispersion
OR8I2	0	0.902738643723305	1	933	no_overdispersion
OR8J1	0	0.176282512975399	0.981072787351495	951	no_overdispersion
OR8J3	0	0.199066007184005	1	948	no_overdispersion
OR8K1	0	0.245060416384302	1	960	no_overdispersion
OR8K3	0	0.0844285335560317	0.819111795848077	939	no_overdispersion
OR8K5	0	0.396905625659731	1	924	no_overdispersion
OR8U1	0	0.00252202165558738	0.17277718746562	930	no_overdispersion
OR9G1	0	0.964464314882706	1	918	no_overdispersion
OR9G4	0	0.0543636553205827	0.710194400850163	984	no_overdispersion
OR9I1	0	0.268724732638461	1	945	no_overdispersion
OR9Q1	0	0.238411396032033	1	933	no_overdispersion
OR9Q2	0	0.421565482980318	1	945	no_overdispersion
ORAOV1	0	0.310278007253896	1	448	no_overdispersion
OSBPL5	0	0.457515166646349	1	2640	no_overdispersion
OSBP	0	0.963028970925878	1	2424	no_overdispersion
OTOG	0	0.816012763752854	1	8783	no_overdispersion
OTUB1	0	0.944627558614652	1	1119	no_overdispersion
OVCH2	0	0.736393163987484	1	1695	no_overdispersion
OVOL1	0	0.696250922863243	1	804	no_overdispersion
P2RX3	0	0.22099967053407	1	1194	no_overdispersion
P2RY2	0	0.591542118426681	1	1134	no_overdispersion
P2RY6	0	0.111759512042674	0.884648988700525	987	no_overdispersion
P4HA3	0	0.401306894268445	1	1822	no_overdispersion
PAAF1	0	0.0433350161174575	0.65567116324665	1411	no_overdispersion
PACS1	0	0.672780558699774	1	2892	no_overdispersion
PACSIN3	0	0.490097198779623	1	1275	no_overdispersion
PAFAH1B2	1	0.839664437348553	1	894	no_overdispersion
PAK1	0	0.96779579140458	1	1705	no_overdispersion
PAMR1	0	0.112688691898069	0.887861477573329	2214	no_overdispersion
PANX1	0	0.971153835111726	1	1281	no_overdispersion
PANX3	0	0.193659641766969	0.999790917078751	1179	no_overdispersion
PARVA	0	0.0893207136388917	0.833541702945621	1493	no_overdispersion
PATE1	0	0.75530399503235	1	381	no_overdispersion
PATE2	0	0.760613084475068	1	342	no_overdispersion
PATE3	0	0.663855774965716	1	297	no_overdispersion
PATE4	0	0.0609931526600727	0.729040439244171	297	no_overdispersion
PATL1	0	0.689447834825775	1	2313	no_overdispersion
PAX6	0	0.979668373895755	1	1311	no_overdispersion
PCF11	0	0.00928682257712364	0.347237001058433	4668	no_overdispersion
PCNXL3	0	0.937776616304407	1	6105	no_overdispersion
PCSK7	1	0.538128851236651	1	2363	no_overdispersion
PC	0	0.043637079367192	0.657257476767551	3759	no_overdispersion
PDDC1	0	0.23148688533599	1	913	no_overdispersion
PDE2A	0	0.198735104344278	1	2920	no_overdispersion
PDE3B	0	0.128729790492473	0.915872739547107	3339	no_overdispersion
PDGFD	0	0.0370119568130054	0.62993658516079	1113	no_overdispersion
PDHX	0	0.417673697315884	1	1621	no_overdispersion
PDZD3	0	0.396540305500428	1	1831	no_overdispersion
PELI3	0	0.260698915019864	1	1566	no_overdispersion
PEX16	0	0.435703038192249	1	1100	no_overdispersion
PGA3	0	0.978199358806729	1	1361	no_overdispersion
PGA4	0	0.927239015083162	1	1872	no_overdispersion
PGA5	0	0.585052518770454	1	1361	no_overdispersion
PGAP2	0	0.282346169065176	1	1367	no_overdispersion
PGM2L1	0	0.790646568470542	1	1869	no_overdispersion
PGR	0	0.998324090545511	1	2802	no_overdispersion
PHF21A	0	0.982571364533926	1	2069	no_overdispersion
PHLDA2	0	0.99999999999993	1	459	no_overdispersion
PHLDB1	0	0.0724600406200062	0.785070772870586	4344	no_overdispersion
PHOX2A	0	0.595824057424644	1	855	no_overdispersion
PHRF1	0	0.77273118082648	1	4950	no_overdispersion
PICALM	1	0.530283091608147	1	1983	no_overdispersion
PIDD	0	0.87495978092476	1	2733	no_overdispersion
PIH1D2	0	0.714033798958974	1	1011	no_overdispersion
PIK3C2A	0	0.798234381663959	1	5061	no_overdispersion
PITPNM1	0	0.240559113175563	1	3735	no_overdispersion
PIWIL4	0	0.820953199079181	1	2626	no_overdispersion
PKNOX2	0	0.681725128430872	1	1419	no_overdispersion
PKP3	0	0.930818703590231	1	2394	no_overdispersion
PLA2G16	0	0.807822192902253	1	489	no_overdispersion
PLAC1L	0	0.31443101977135	1	484	no_overdispersion
PLCB3	0	0.928065624327525	1	3705	no_overdispersion
PLEKHA7	0	0.990764957068306	1	3828	no_overdispersion
PLEKHB1	0	1	1	732	no_overdispersion
PNPLA2	0	0.974370474390583	1	1515	no_overdispersion
POLA2	0	0.349781806175639	1	1860	no_overdispersion
POLD3	0	0.00322474769669617	0.203592595565841	1401	no_overdispersion
POLD4	0	0.181823354601378	0.99041093725733	352	no_overdispersion
POLR2G	0	0.99999999999997	1	519	no_overdispersion
POLR2L	0	0.240051087769426	1	204	no_overdispersion
POU2AF1	1	0.0488698245915821	0.683270212256201	771	no_overdispersion
POU2F3	0	0.889915710046943	1	1345	no_overdispersion
PPFIA1	0	0.108007387651575	0.875808198393551	3617	no_overdispersion
PPFIBP2	0	0.933219544267915	1	2724	no_overdispersion
PPME1	0	0.268819684764932	1	1203	no_overdispersion
PPP1CA	0	0.257204566292383	1	1026	no_overdispersion
PPP1R14B	0	0.733129449387176	1	477	no_overdispersion
PPP1R32	0	0.614955404913128	1	1352	no_overdispersion
PPP2R1B	0	0.584553438657511	1	2077	no_overdispersion
PPP2R5B	0	0.574776872890789	1	1494	no_overdispersion
PPP6R3	0	0.439459214718999	1	2704	no_overdispersion
PRCP	0	0.839472758874355	1	1554	no_overdispersion
PRDM10	0	0.694327005363291	1	3519	no_overdispersion
PRDM11	0	0.353250758521779	1	1536	no_overdispersion
PRDX5	0	0.393740761407064	1	645	no_overdispersion
PRG2	0	0.586203255297567	1	669	no_overdispersion
PRG3	0	0.579414276446622	1	678	no_overdispersion
PRKCDBP	0	0.874155373437457	1	882	no_overdispersion
PRKRIR	0	0.1506536107529	0.94679697410504	2286	no_overdispersion
PRMT3	0	0.515387791847346	1	1596	no_overdispersion
PRPF19	0	0.883930474091947	1	1515	no_overdispersion
PRR5L	0	0.61201347719714	1	1107	no_overdispersion
PRRG4	0	0.117083584716819	0.899306544597952	681	no_overdispersion
PRSS23	0	0.0700052124624897	0.774577210530906	1428	no_overdispersion
PSMA1	0	1	1	829	no_overdispersion
PSMC3	0	0.790210822958145	1	1320	no_overdispersion
PSMD13	0	0.926615569805153	1	1216	no_overdispersion
PTDSS2	0	0.940282355984226	1	1464	no_overdispersion
PTGDR2	0	0.984631738130317	1	1188	no_overdispersion
PTH	0	0.599493540877809	1	348	no_overdispersion
PTPMT1	0	0.162774430970511	0.971169963424002	715	no_overdispersion
PTPN5	0	0.994933519784753	1	1845	no_overdispersion
PTPRCAP	0	0.0585055648806001	0.719777120334172	621	no_overdispersion
PTPRJ	0	0.0262878860521018	0.539097501985589	4019	no_overdispersion
PTS	0	1	1	438	no_overdispersion
PUS3	0	0.158880999706731	0.963445847458347	1446	no_overdispersion
PVRL1	0	0.841819077543609	1	1984	no_overdispersion
PYGM	0	0.575609648014899	1	2529	no_overdispersion
QSER1	0	0.226932012909652	1	5328	no_overdispersion
RAB1B	0	0.474686699165149	1	606	no_overdispersion
RAB30	0	0.199171253716178	1	620	no_overdispersion
RAB38	0	0.777164582143405	1	636	no_overdispersion
RAB39A	0	0.473398230609044	1	654	no_overdispersion
RAB3IL1	0	0.926688536905647	1	1301	no_overdispersion
RAB6A	0	0.322109620676008	1	733	no_overdispersion
RAD9A	0	0.0636656073984479	0.743234767834491	1176	no_overdispersion
RAG1	0	0.359067676001859	1	3132	no_overdispersion
RAG2	0	0.063370157968266	0.741918394947706	1584	no_overdispersion
RAPSN	0	0.390027283285162	1	1570	no_overdispersion
RARRES3	0	0.635901506208289	1	598	no_overdispersion
RASGRP2	0	0.636273590142816	1	1941	no_overdispersion
RASSF7	0	0.68775561385067	1	1185	no_overdispersion
RBM14-RBM4	0	0.368846962320938	1	1040	no_overdispersion
RBM14	0	0.8675637327441	1	2131	no_overdispersion
RBM4B	0	0.797020956128121	1	1176	no_overdispersion
RBM4	0	0.500346509174412	1	1781	no_overdispersion
RBM7	0	0.999999999999913	1	1038	no_overdispersion
RBMXL2	0	0.951781336682309	1	1179	no_overdispersion
RCE1	0	0.267718809455284	1	990	no_overdispersion
RCN1	0	0.958989906939059	1	1097	no_overdispersion
RCOR2	0	0.999999999999804	1	1572	no_overdispersion
RDX	0	0.210957333401351	1	1819	no_overdispersion
RELA	0	0.977956297743741	1	1757	no_overdispersion
RELT	0	0.414694299011985	1	1293	no_overdispersion
REXO2	0	0.438461062450635	1	780	no_overdispersion
RHOD	0	0.439857806413508	1	660	no_overdispersion
RHOG	0	0.759272556262985	1	576	no_overdispersion
RIC3	0	0.382442240843269	1	1184	no_overdispersion
RIC8A	0	0.969234494560007	1	1702	no_overdispersion
RIN1	0	0.920545248255725	1	2416	no_overdispersion
RNASEH2C	0	0.374729570431436	1	744	no_overdispersion
RNF121	0	0.597477254411434	1	994	no_overdispersion
RNF141	0	0.457161108004909	1	697	no_overdispersion
RNF169	0	0.465649674919387	1	2127	no_overdispersion
RNF214	0	0.00915626043613085	0.343689962881356	2112	no_overdispersion
RNF26	0	0.554582965788458	1	1302	no_overdispersion
RNH1	0	0.438868311463343	1	1386	no_overdispersion
ROBO3	0	0.877157534290849	1	4255	no_overdispersion
ROBO4	0	0.95709893287403	1	3024	no_overdispersion
ROM1	0	0.234949369994556	1	1056	no_overdispersion
RP11-111M22.2	0	0.917878918938762	1	1016	no_overdispersion
RP11-113D6.10	0	0.00642908869308988	0.288574666373284	465	no_overdispersion
RP11-113D6.6	0	0.927817876426203	1	477	no_overdispersion
RP11-1167A19.2	0	0.208064947687406	1	240	no_overdispersion
RP11-295K3.1	0	0.0446599576653426	0.660929106690453	1136	no_overdispersion
RP11-315O6.2	0	0.119720997102116	0.903264756336997	231	no_overdispersion
RP11-664I21.6	0	0.999999999999985	1	123	no_overdispersion
RP11-712L6.5	0	0.0123978311246595	0.397887726894072	192	no_overdispersion
RP11-770J1.4	0	0.999999999999938	1	444	no_overdispersion
RP11-770J1.5	0	0.0707863457710579	0.777116233846916	117	no_overdispersion
RP11-794P6.2	0	0.704868278396624	1	573	no_overdispersion
RP11-817J15.3	0	0.220441988543338	1	261	no_overdispersion
RP11-831H9.11	0	0.999999999999975	1	300	no_overdispersion
RP11-849H4.2	0	0.933217478934563	1	815	no_overdispersion
RP11-867G23.8	0	0.079901665894058	0.809420047594842	312	no_overdispersion
RP11-872D17.8	0	0.999999999999974	1	681	no_overdispersion
RPL27A	0	0.999999999999976	1	456	no_overdispersion
RPLP2	0	0.498288189237911	1	348	no_overdispersion
RPS13	0	0.586812536682329	1	481	no_overdispersion
RPS25	0	1	1	378	no_overdispersion
RPS3	0	0.47331443808425	1	784	no_overdispersion
RPS6KA4	0	0.901089247733544	1	2319	no_overdispersion
RPS6KB2	0	0.607516879859625	1	1457	no_overdispersion
RPUSD4	0	0.297486079922462	1	1134	no_overdispersion
RRAS2	0	0.41543422053429	1	636	no_overdispersion
RRM1	0	0.978348134376689	1	2379	no_overdispersion
RRP8	0	0.46872985370422	1	1371	no_overdispersion
RSF1	0	0.630445282430392	1	4326	no_overdispersion
RTN3	0	0.489388484545598	1	3289	no_overdispersion
RTN4RL2	0	0.999999999999985	1	1434	no_overdispersion
SAA1	0	0.096297845895251	0.847647650090057	369	no_overdispersion
SAA2	0	0.839943421096016	1	516	no_overdispersion
SAA4	0	0.805189854020605	1	393	no_overdispersion
SAAL1	0	0.174268934852762	0.97946957474733	1434	no_overdispersion
SAC3D1	0	0.823752557335974	1	1077	no_overdispersion
SART1	0	0.945936510052673	1	2403	no_overdispersion
SBF2	0	0.441967953435017	1	5550	no_overdispersion
SC5D	0	0.298969041874243	1	900	no_overdispersion
SCGB1A1	0	1	1	276	no_overdispersion
SCGB1C1	0	0.360209750414088	1	288	no_overdispersion
SCGB1D1	0	0.0790807696440763	0.807577372477367	273	no_overdispersion
SCGB1D2	0	0.50497687111559	1	273	no_overdispersion
SCGB1D4	0	0.109051443740973	0.875808198393551	252	no_overdispersion
SCGB2A1	0	0.533914258860269	1	288	no_overdispersion
SCGB2A2	0	0.999999999999942	1	402	no_overdispersion
SCN2B	0	0.543618208076492	1	648	no_overdispersion
SCN3B	0	0.382255417793898	1	648	no_overdispersion
SCN4B	0	0.955319907878895	1	687	no_overdispersion
SCT	0	0.999999999999943	1	366	no_overdispersion
SCUBE2	0	0.713385027437396	1	3087	no_overdispersion
SCYL1	0	0.94793731178445	1	2453	no_overdispersion
SDHAF2	1	0.00789409175056371	0.319345862917762	589	no_overdispersion
SDHD	1	0.616464256888298	1	599	no_overdispersion
SERGEF	0	0.833457442908153	1	1377	no_overdispersion
SERPING1	0	0.0103865018552887	0.369008265176087	1647	no_overdispersion
SERPINH1	0	0.919447254485017	1	1278	no_overdispersion
SESN3	0	0.963615670568532	1	1525	no_overdispersion
SF1	0	0.639411754285317	1	2429	no_overdispersion
SF3B2	0	0.704937670865932	1	2688	no_overdispersion
SHANK2	0	0.858466149781419	1	5765	no_overdispersion
SIAE	0	0.701075220586859	1	1572	no_overdispersion
SIDT2	0	0.76457519328548	1	2511	no_overdispersion
SIGIRR	0	0.560482173798043	1	1522	no_overdispersion
SIK2	0	0.795581110198552	1	2781	no_overdispersion
SIK3	0	0.959931482013437	1	4110	no_overdispersion
SIPA1	0	0.916940292551476	1	3129	no_overdispersion
SIRT3	0	0.391191066622851	1	1254	no_overdispersion
SLC15A3	0	0.332316213904671	1	1746	no_overdispersion
SLC17A6	0	0.5348613945988	1	1749	no_overdispersion
SLC1A2	0	0.118311356088084	0.902463900102687	1764	no_overdispersion
SLC22A10	0	0.600814135233257	1	1630	no_overdispersion
SLC22A11	0	0.298008608134909	1	1653	no_overdispersion
SLC22A12	0	0.818181797615803	1	1662	no_overdispersion
SLC22A18AS	0	0.288409982174738	1	762	no_overdispersion
SLC22A18	0	0.922818043295244	1	1275	no_overdispersion
SLC22A24	0	0.0349754617707672	0.615079305675012	1795	no_overdispersion
SLC22A25	0	0.0339648901205373	0.606414852182621	1785	no_overdispersion
SLC22A6	0	0.161143513410256	0.969075419808835	1692	no_overdispersion
SLC22A8	0	0.112467537985582	0.887571685020642	1702	no_overdispersion
SLC22A9	0	0.162209418101704	0.971095224663313	1662	no_overdispersion
SLC25A22	0	0.384616999690631	1	972	no_overdispersion
SLC25A45	0	0.654377117277183	1	867	no_overdispersion
SLC29A2	0	0.912449327901793	1	1371	no_overdispersion
SLC35C1	0	0.546864172638803	1	1095	no_overdispersion
SLC35F2	0	0.978966968975646	1	1125	no_overdispersion
SLC36A4	0	0.245544672279535	1	1515	no_overdispersion
SLC37A2	0	0.798868261289767	1	1534	no_overdispersion
SLC37A4	0	0.600097545865087	1	1356	no_overdispersion
SLC39A13	0	0.916744879171696	1	1355	no_overdispersion
SLC3A2	0	0.175557317169896	0.980149246269616	1989	no_overdispersion
SLC43A1	0	0.347875089778055	1	1680	no_overdispersion
SLC43A3	0	0.15547440632731	0.958327518642344	1515	no_overdispersion
SLC5A12	0	0.606349244161296	1	1895	no_overdispersion
SLC6A5	0	0.377569251221881	1	2394	no_overdispersion
SLCO2B1	0	0.660210586125626	1	2165	no_overdispersion
SLN	0	0.353288303534179	1	96	no_overdispersion
SMCO4	0	0.999999999999928	1	180	no_overdispersion
SMPD1	0	0.350696058630933	1	1936	no_overdispersion
SMTNL1	0	0.683175916776953	1	1539	no_overdispersion
SNX15	0	0.651058703538115	1	1029	no_overdispersion
SNX19	0	0.209551298159918	1	3076	no_overdispersion
SNX32	0	0.467850803352974	1	1212	no_overdispersion
SORL1	0	0.949556365460738	1	6893	no_overdispersion
SOX6	0	0.967885854967554	1	2538	no_overdispersion
SPA17	0	0.0788876422810259	0.806295350192906	456	no_overdispersion
SPATA19	0	0.694223786918534	1	504	no_overdispersion
SPCS2	0	0.357756213171332	1	681	no_overdispersion
SPDYC	0	0.839578831227377	1	882	no_overdispersion
SPI1	0	0.481594137977525	1	1061	no_overdispersion
SPTBN2	0	0.736280161448467	1	7332	no_overdispersion
SPTY2D1	0	0.231242115823451	1	2058	no_overdispersion
SRPR	0	0.212904216848872	1	1917	no_overdispersion
SSH3	0	0.740763262338112	1	1980	no_overdispersion
SSRP1	0	0.895636708494747	1	2130	no_overdispersion
SSSCA1	0	1	1	638	no_overdispersion
ST14	0	0.592809372102312	1	2568	no_overdispersion
ST3GAL4	0	0.459774420880347	1	1033	no_overdispersion
ST5	0	0.993482001247931	1	3433	no_overdispersion
STARD10	0	0.923842547755468	1	876	no_overdispersion
STIM1	0	0.528949104712591	1	2095	no_overdispersion
STIP1	0	0.272175917287666	1	1821	no_overdispersion
STK33	0	0.882127452995958	1	1545	no_overdispersion
STT3A	0	0.812756214921389	1	2118	no_overdispersion
STX3	0	0.0941208486358777	0.842111169325225	1029	no_overdispersion
STX5	0	0.282460656806218	1	1106	no_overdispersion
SUV420H1	0	0.0620845571551153	0.730820570487309	2701	no_overdispersion
SVIP	0	0.999999999999966	1	234	no_overdispersion
SWAP70	0	0.725531803684116	1	1758	no_overdispersion
SYT12	0	0.252394762501234	1	1266	no_overdispersion
SYT13	0	0.738852571568177	1	1281	no_overdispersion
SYT7	0	0.0901095588486359	0.835437874921909	2061	no_overdispersion
SYT8	0	0.85470840671475	1	1770	no_overdispersion
SYT9	0	0.994426458715789	1	1537	no_overdispersion
SYTL2	0	0.757157775076128	1	6781	no_overdispersion
SYVN1	0	0.0606070394315216	0.729040439244171	1854	no_overdispersion
TAF10	0	1	1	657	no_overdispersion
TAF1D	0	1	1	837	no_overdispersion
TAF6L	0	0.766085019924388	1	1869	no_overdispersion
TAGLN	0	0.726606493445223	1	606	no_overdispersion
TALDO1	0	0.173701544287765	0.97946957474733	1014	no_overdispersion
TBC1D10C	0	0.799885068629258	1	1341	no_overdispersion
TBCEL	0	0.422953420698446	1	1275	no_overdispersion
TBRG1	0	0.509051940267079	1	1236	no_overdispersion
TBX10	0	0.785005472502991	1	1158	no_overdispersion
TCIRG1	0	0.5362760131313	1	2493	no_overdispersion
TCN1	0	0.727546660030771	1	1302	no_overdispersion
TCP11L1	0	0.300990273498484	1	1811	no_overdispersion
TEAD1	0	0.183424765902574	0.993132228540854	1335	no_overdispersion
TECTA	0	0.829920826903397	1	6468	no_overdispersion
TENM4	0	0.551310300535664	1	8310	no_overdispersion
TEX12	0	0.00119219647787429	0.113693168305535	372	no_overdispersion
TEX40	0	0.940069718613873	1	603	no_overdispersion
THRSP	0	0.637820020040299	1	441	no_overdispersion
THY1	0	0.707045990325114	1	486	no_overdispersion
THYN1	0	0.357757521236426	1	678	no_overdispersion
TH	0	0.994270645110443	1	1587	no_overdispersion
TIGD3	0	0.205797732301351	1	1416	no_overdispersion
TIMM10B	0	0.999999999999918	1	312	no_overdispersion
TIMM10	0	0.999999999999972	1	273	no_overdispersion
TIMM8B	0	0.999999999999983	1	297	no_overdispersion
TIRAP	0	1	1	728	no_overdispersion
TM7SF2	0	1	1	1257	no_overdispersion
TMEM109	0	0.76693696371222	1	732	no_overdispersion
TMEM123	0	0.469825441328419	1	627	no_overdispersion
TMEM126A	0	0.99999999999992	1	588	no_overdispersion
TMEM126B	0	0.857367658777427	1	697	no_overdispersion
TMEM132A	0	0.276055840149621	1	3075	no_overdispersion
TMEM133	0	0.174007741413736	0.97946957474733	390	no_overdispersion
TMEM134	0	0.505246128957162	1	602	no_overdispersion
TMEM135	0	0.851548749389776	1	1464	no_overdispersion
TMEM136	0	0.623442282878097	1	804	no_overdispersion
TMEM138	0	0.0748620817756248	0.793456803687179	507	no_overdispersion
TMEM151A	0	0.145479636575462	0.93524325944813	1407	no_overdispersion
TMEM179B	0	0.179736741352217	0.988013328997514	660	no_overdispersion
TMEM216	0	0.288316672999849	1	447	no_overdispersion
TMEM218	0	0.103767142496545	0.869251699534688	426	no_overdispersion
TMEM223	0	0.52653589703227	1	614	no_overdispersion
TMEM225	0	0.0742979155425513	0.792874560506654	678	no_overdispersion
TMEM258	0	0.379976666372555	1	240	no_overdispersion
TMEM25	0	0.255846989525466	1	1252	no_overdispersion
TMEM41B	0	0.181533085648376	0.990255268341396	892	no_overdispersion
TMEM45B	0	0.899665206225968	1	828	no_overdispersion
TMEM80	0	0.528122672657577	1	651	no_overdispersion
TMEM86A	0	0.999999999999947	1	723	no_overdispersion
TMEM9B	0	0.701849179783578	1	666	no_overdispersion
TMPRSS13	0	0.167186656722137	0.97505897755112	1997	no_overdispersion
TMPRSS4	0	0.74089428442063	1	1314	no_overdispersion
TMPRSS5	0	0.343904511204391	1	1453	no_overdispersion
TMX2	0	0.772363416502015	1	891	no_overdispersion
TNKS1BP1	0	0.168743079467844	0.977362919764942	5190	no_overdispersion
TNNI2	0	0.153781237657547	0.954498318320912	564	no_overdispersion
TNNT3	0	0.968888414594378	1	880	no_overdispersion
TOLLIP	0	0.616908183300982	1	825	no_overdispersion
TP53AIP1	0	0.74625627611472	1	569	no_overdispersion
TP53I11	0	0.843891842942311	1	701	no_overdispersion
TPBGL	0	0.9999479413101	1	1149	no_overdispersion
TPCN2	0	0.822220016282037	1	2259	no_overdispersion
TPH1	0	0.901652821670524	1	1425	no_overdispersion
TPP1	0	0.0549666731110706	0.710494567381215	1696	no_overdispersion
TRAF6	0	0.699600525582229	1	1569	no_overdispersion
TRAPPC4	0	0.369478753022246	1	853	no_overdispersion
TREH	0	0.260513092446265	1	1844	no_overdispersion
TRIM21	0	0.511329122055069	1	1451	no_overdispersion
TRIM22	0	0.200217753014439	1	1497	no_overdispersion
TRIM29	0	0.0132726438938977	0.407493143292132	1822	no_overdispersion
TRIM34	0	0.322017872347601	1	1467	no_overdispersion
TRIM3	0	0.87267748234028	1	2235	no_overdispersion
TRIM44	0	0.0403828993345007	0.642124780830013	1035	no_overdispersion
TRIM48	0	0.116745174328564	0.897781580219979	675	no_overdispersion
TRIM49B	0	0.0609417885630536	0.729040439244171	1359	no_overdispersion
TRIM49C	0	0.383181312799087	1	1962	no_overdispersion
TRIM49D1	0	0.998220512791158	1	1359	no_overdispersion
TRIM49	0	0.386266100003701	1	1359	no_overdispersion
TRIM51	0	0.00151590422739828	0.130384340179439	1359	no_overdispersion
TRIM5	0	0.491308469266792	1	1758	no_overdispersion
TRIM6-TRIM34	0	0.39377479846721	1	2529	no_overdispersion
TRIM64B	0	0.259457022912577	1	1350	no_overdispersion
TRIM64C	0	0.146865902202335	0.938013887470051	1344	no_overdispersion
TRIM66	0	0.406449676989413	1	3748	no_overdispersion
TRIM68	0	0.959275702576878	1	1458	no_overdispersion
TRIM6	0	0.562229517063213	1	1551	no_overdispersion
TRIM77	0	0.000496330073605485	0.0673051542066706	1353	no_overdispersion
[truncated: 36,513 more rows]
