# Supplementary material for: Non-coding cancer driver candidates identified with a sample- and position-specific model of the somatic mutation rate
Source: eLife journal article supplement (doi:10.7554/elife.21778), 2017-03-31
Supplement: supp [file elife-21778-supp-v2.zip › elife_poa_e21778_Figure_A3_source_data_1.txt]

top_x_ranking_elements	COSMIC_recall_fraction	method
1	1	ncdDetect
2	1	ncdDetect
3	1	ncdDetect
4	1	ncdDetect
5	0.8	ncdDetect
6	0.666666666666667	ncdDetect
7	0.571428571428571	ncdDetect
8	0.625	ncdDetect
9	0.666666666666667	ncdDetect
10	0.6	ncdDetect
11	0.636363636363636	ncdDetect
12	0.583333333333333	ncdDetect
13	0.615384615384615	ncdDetect
14	0.642857142857143	ncdDetect
15	0.6	ncdDetect
16	0.5625	ncdDetect
17	0.529411764705882	ncdDetect
18	0.5	ncdDetect
19	0.473684210526316	ncdDetect
20	0.45	ncdDetect
21	0.428571428571429	ncdDetect
22	0.409090909090909	ncdDetect
23	0.391304347826087	ncdDetect
24	0.375	ncdDetect
25	0.36	ncdDetect
26	0.346153846153846	ncdDetect
27	0.333333333333333	ncdDetect
28	0.321428571428571	ncdDetect
29	0.310344827586207	ncdDetect
30	0.3	ncdDetect
31	0.32258064516129	ncdDetect
32	0.3125	ncdDetect
33	0.303030303030303	ncdDetect
34	0.323529411764706	ncdDetect
35	0.342857142857143	ncdDetect
36	0.333333333333333	ncdDetect
37	0.324324324324324	ncdDetect
38	0.315789473684211	ncdDetect
39	0.307692307692308	ncdDetect
40	0.3	ncdDetect
41	0.292682926829268	ncdDetect
42	0.285714285714286	ncdDetect
43	0.302325581395349	ncdDetect
44	0.295454545454545	ncdDetect
45	0.288888888888889	ncdDetect
46	0.282608695652174	ncdDetect
47	0.297872340425532	ncdDetect
48	0.291666666666667	ncdDetect
49	0.285714285714286	ncdDetect
50	0.28	ncdDetect
51	0.274509803921569	ncdDetect
52	0.269230769230769	ncdDetect
53	0.283018867924528	ncdDetect
54	0.277777777777778	ncdDetect
55	0.272727272727273	ncdDetect
56	0.267857142857143	ncdDetect
57	0.263157894736842	ncdDetect
58	0.258620689655172	ncdDetect
59	0.254237288135593	ncdDetect
60	0.25	ncdDetect
61	0.245901639344262	ncdDetect
62	0.241935483870968	ncdDetect
63	0.238095238095238	ncdDetect
64	0.234375	ncdDetect
65	0.230769230769231	ncdDetect
66	0.227272727272727	ncdDetect
67	0.223880597014925	ncdDetect
68	0.220588235294118	ncdDetect
69	0.217391304347826	ncdDetect
70	0.214285714285714	ncdDetect
71	0.211267605633803	ncdDetect
72	0.208333333333333	ncdDetect
73	0.205479452054795	ncdDetect
74	0.202702702702703	ncdDetect
75	0.2	ncdDetect
76	0.197368421052632	ncdDetect
77	0.194805194805195	ncdDetect
78	0.192307692307692	ncdDetect
79	0.189873417721519	ncdDetect
80	0.1875	ncdDetect
81	0.197530864197531	ncdDetect
82	0.195121951219512	ncdDetect
83	0.192771084337349	ncdDetect
84	0.19047619047619	ncdDetect
85	0.188235294117647	ncdDetect
86	0.186046511627907	ncdDetect
87	0.183908045977011	ncdDetect
88	0.181818181818182	ncdDetect
89	0.179775280898876	ncdDetect
90	0.177777777777778	ncdDetect
91	0.186813186813187	ncdDetect
92	0.184782608695652	ncdDetect
93	0.182795698924731	ncdDetect
94	0.180851063829787	ncdDetect
95	0.178947368421053	ncdDetect
96	0.177083333333333	ncdDetect
97	0.175257731958763	ncdDetect
98	0.173469387755102	ncdDetect
99	0.171717171717172	ncdDetect
100	0.17	ncdDetect
1	1	ExInAtor
2	0.5	ExInAtor
3	0.333333333333333	ExInAtor
4	0.5	ExInAtor
5	0.4	ExInAtor
6	0.333333333333333	ExInAtor
7	0.285714285714286	ExInAtor
8	0.25	ExInAtor
9	0.333333333333333	ExInAtor
10	0.3	ExInAtor
11	0.272727272727273	ExInAtor
12	0.333333333333333	ExInAtor
13	0.307692307692308	ExInAtor
14	0.285714285714286	ExInAtor
15	0.266666666666667	ExInAtor
16	0.25	ExInAtor
17	0.235294117647059	ExInAtor
18	0.222222222222222	ExInAtor
19	0.210526315789474	ExInAtor
20	0.2	ExInAtor
21	0.19047619047619	ExInAtor
22	0.227272727272727	ExInAtor
23	0.217391304347826	ExInAtor
24	0.208333333333333	ExInAtor
25	0.2	ExInAtor
26	0.192307692307692	ExInAtor
27	0.185185185185185	ExInAtor
28	0.178571428571429	ExInAtor
29	0.172413793103448	ExInAtor
30	0.166666666666667	ExInAtor
31	0.161290322580645	ExInAtor
32	0.15625	ExInAtor
33	0.151515151515152	ExInAtor
34	0.147058823529412	ExInAtor
35	0.142857142857143	ExInAtor
36	0.138888888888889	ExInAtor
37	0.135135135135135	ExInAtor
38	0.157894736842105	ExInAtor
39	0.153846153846154	ExInAtor
40	0.175	ExInAtor
41	0.170731707317073	ExInAtor
42	0.166666666666667	ExInAtor
43	0.162790697674419	ExInAtor
44	0.159090909090909	ExInAtor
45	0.155555555555556	ExInAtor
46	0.152173913043478	ExInAtor
47	0.148936170212766	ExInAtor
48	0.145833333333333	ExInAtor
49	0.142857142857143	ExInAtor
50	0.14	ExInAtor
51	0.137254901960784	ExInAtor
52	0.134615384615385	ExInAtor
53	0.132075471698113	ExInAtor
54	0.12962962962963	ExInAtor
55	0.127272727272727	ExInAtor
56	0.125	ExInAtor
57	0.12280701754386	ExInAtor
58	0.120689655172414	ExInAtor
59	0.11864406779661	ExInAtor
60	0.116666666666667	ExInAtor
61	0.114754098360656	ExInAtor
62	0.112903225806452	ExInAtor
63	0.111111111111111	ExInAtor
64	0.109375	ExInAtor
65	0.107692307692308	ExInAtor
66	0.106060606060606	ExInAtor
67	0.104477611940299	ExInAtor
68	0.102941176470588	ExInAtor
69	0.101449275362319	ExInAtor
70	0.1	ExInAtor
71	0.0985915492957747	ExInAtor
72	0.0972222222222222	ExInAtor
73	0.10958904109589	ExInAtor
74	0.108108108108108	ExInAtor
75	0.106666666666667	ExInAtor
76	0.105263157894737	ExInAtor
77	0.103896103896104	ExInAtor
78	0.102564102564103	ExInAtor
79	0.10126582278481	ExInAtor
80	0.1	ExInAtor
81	0.0987654320987654	ExInAtor
82	0.0975609756097561	ExInAtor
83	0.0963855421686747	ExInAtor
84	0.0952380952380952	ExInAtor
85	0.0941176470588235	ExInAtor
86	0.0930232558139535	ExInAtor
87	0.0919540229885057	ExInAtor
88	0.0909090909090909	ExInAtor
89	0.0898876404494382	ExInAtor
90	0.0888888888888889	ExInAtor
91	0.0879120879120879	ExInAtor
92	0.0869565217391304	ExInAtor
93	0.0860215053763441	ExInAtor
94	0.0851063829787234	ExInAtor
95	0.0842105263157895	ExInAtor
96	0.0833333333333333	ExInAtor
97	0.0824742268041237	ExInAtor
98	0.0816326530612245	ExInAtor
99	0.0808080808080808	ExInAtor
100	0.08	ExInAtor
