# Supplementary material for: Non-coding cancer driver candidates identified with a sample- and position-specific model of the somatic mutation rate
Source: eLife journal article supplement (doi:10.7554/elife.21778), 2017-03-31
Supplement: supp [file elife-21778-supp-v2.zip › elife_poa_e21778_Supplementary_File_2.xlsx]

## Sheet: legend
General information
p-values obtained with ncdDetect using log-likelihoods as scoring scheme
Sheet number	Sheet name	Information
2	logLik_prom	Results for promoter elements
3	logLik_ss	Results for splice sites
4	logLik_3utr	Results for 3' UTRs
5	logLik_5utr	Results for 5'UTRs
6	logLik_cds	Results for protein-coding genes
Column keys
scheme	applied scoring scheme
type	analysed element type
chromosome	element chromosome
id	element id
gname	associated gene name
size	region size in base pairs (not necessarily a contiguous region)
n_mut_observed	number of mutations observed in region across all samples
n_mut_expected	number of mutations expected by the null model
observed_expected_ratio	number of observed mutations divided by number of expected mutations
p_value	raw ncdDetect p-value
p_value_BH	p-value adjusted for multiple testing, Benjamini-Hochberg approach

## Sheet: LogLik_prom
scheme	type	chromosome	id	gname	size	n_mut_observed	n_mut_expected	observed_expected_ratio	p_value	p_value_BH
log-likelihoods	prom	chr5	gencode::TERT::ENSG00000164362.14	TERT	600	77	3.37818	22.7933	2.49909e-83	4.78752e-79
log-likelihoods	prom	chr10	gencode::FRG2B::ENSG00000225899.3	FRG2B	754	74	3.90666	18.942	1.2217e-51	1.17021e-47
log-likelihoods	prom	chr6	gencode::HLA-DRB5::ENSG00000198502.5	HLA-DRB5	835	43	4.0787	10.5426	4.5857e-27	2.92828e-23
log-likelihoods	prom	chr7	gencode::MUC3A::ENSG00000169894.13	MUC3A	500	17	0.856448	19.8494	7.13197e-24	3.41568e-20
log-likelihoods	prom	chr21	gencode::SPATC1L::ENSG00000160284.10	SPATC1L	894	26	3.05766	8.50325	2.7997e-20	9.79577e-17
log-likelihoods	prom	chr1	gencode::AL645608.2::ENSG00000269308.1	AL645608.2	982	41	4.01684	10.207	3.06805e-20	9.79577e-17
log-likelihoods	prom	chr13	gencode::RNF219::ENSG00000152193.7	RNF219	867	32	5.90758	5.41677	2.27562e-16	6.22773e-13
log-likelihoods	prom	chr6	gencode::HLA-DRB1::ENSG00000196126.6	HLA-DRB1	792	33	3.9755	8.30084	5.74702e-16	1.3762e-12
log-likelihoods	prom	chr19	gencode::OR7G3::ENSG00000170920.2	OR7G3	500	20	2.15999	9.2593	1.41249e-15	3.00657e-12
log-likelihoods	prom	chr19	gencode::EPS8L1::ENSG00000131037.10	EPS8L1	2339	55	6.77634	8.11648	1.1017e-14	2.11053e-11
log-likelihoods	prom	chr8	gencode::ADRB3::ENSG00000188778.3	ADRB3	500	18	1.71151	10.517	2.02984e-14	3.53506e-11
log-likelihoods	prom	chr3	gencode::TM4SF18::ENSG00000163762.2	TM4SF18	749	19	2.05676	9.23784	2.23739e-14	3.57181e-11
log-likelihoods	prom	chr8	gencode::SNX16::ENSG00000104497.9	SNX16	926	25	5.25384	4.75842	1.33323e-13	1.96466e-10
log-likelihoods	prom	chr17	gencode::KLHL11::ENSG00000178502.5	KLHL11	500	16	1.73398	9.22735	2.12268e-12	2.90458e-09
log-likelihoods	prom	chr1	gencode::PRAMEF4::ENSG00000243073.3	PRAMEF4	943	22	3.67383	5.9883	4.66986e-12	5.96403e-09
log-likelihoods	prom	chr19	gencode::RPL13A::ENSG00000142541.12	RPL13A	907	27	3.02728	8.91889	1.0283e-11	1.23119e-08
log-likelihoods	prom	chr7	gencode::CCL26::ENSG00000006606.4	CCL26	1543	27	5.01764	5.38101	1.25987e-11	1.41973e-08
log-likelihoods	prom	chr7	gencode::MUC12::ENSG00000205277.5	MUC12	931	21	3.34417	6.27958	1.35742e-11	1.44468e-08
log-likelihoods	prom	chr3	gencode::ZNF717::ENSG00000227124.4	ZNF717	954	33	7.89479	4.17997	1.69716e-11	1.71119e-08
log-likelihoods	prom	chr16	gencode::C16orf91::ENSG00000174109.3	C16orf91	1354	28	3.93906	7.10829	3.018e-11	2.89079e-08
log-likelihoods	prom	chr6	gencode::C6orf62::ENSG00000112308.8	C6orf62	500	18	2.2981	7.83256	4.87322e-11	4.44554e-08
log-likelihoods	prom	chr12	gencode::KDM5A::ENSG00000073614.7	KDM5A	466	13	1.11741	11.634	1.25392e-10	1.09188e-07
log-likelihoods	prom	chr21	gencode::C21orf119::ENSG00000256073.2	C21orf119	240	11	0.740415	14.8565	3.21247e-10	2.67571e-07
log-likelihoods	prom	chr2	gencode::EN1::ENSG00000163064.6	EN1	500	15	2.51527	5.96358	7.15052e-10	5.7076e-07
log-likelihoods	prom	chr11	gencode::WDR74::ENSG00000133316.11	WDR74	1649	23	5.20016	4.42294	2.81293e-09	2.15549e-06
log-likelihoods	prom	chr21	gencode::URB1::ENSG00000142207.5	URB1	343	11	0.970256	11.3372	6.14909e-09	4.5307e-06
log-likelihoods	prom	chr7	gencode::NME8::ENSG00000086288.7	NME8	984	22	5.30599	4.14626	9.31756e-09	6.61098e-06
log-likelihoods	prom	chr10	gencode::PLEKHS1::ENSG00000148735.10	PLEKHS1	3040	34	9.68702	3.50985	1.26269e-08	8.63904e-06
log-likelihoods	prom	chr19	gencode::AP2A1::ENSG00000196961.8	AP2A1	931	26	2.47669	10.4979	1.55477e-08	1.02706e-05
log-likelihoods	prom	chr17	gencode::ALOX12B::ENSG00000179477.5	ALOX12B	590	11	1.67607	6.56298	4.41091e-08	2.81666e-05
log-likelihoods	prom	chr4	gencode::ATP10D::ENSG00000145246.9	ATP10D	777	16	2.93179	5.45743	5.08838e-08	3.14446e-05
log-likelihoods	prom	chr8	gencode::LY6K::ENSG00000160886.9	LY6K	839	15	2.97269	5.04593	6.04573e-08	3.61931e-05
log-likelihoods	prom	chr11	gencode::OR4C5::ENSG00000176540.3	OR4C5	500	13	1.80297	7.21032	7.20741e-08	4.18401e-05
log-likelihoods	prom	chr9	gencode::PRSS3::ENSG00000010438.12	PRSS3	1976	22	5.38253	4.0873	8.81345e-08	4.86121e-05
log-likelihoods	prom	chr19	gencode::OR1M1::ENSG00000170929.5	OR1M1	500	11	1.5988	6.88016	8.88147e-08	4.86121e-05
log-likelihoods	prom	chr8	gencode::RP11-481A20.11::ENSG00000255098.1	RP11-481A20.11	891	14	3.44224	4.06712	1.59023e-07	8.46222e-05
log-likelihoods	prom	chr12	gencode::SMUG1::ENSG00000123415.10	SMUG1	997	19	2.67945	7.09101	2.12925e-07	0.000110243
log-likelihoods	prom	chr3	gencode::CCDC66::ENSG00000180376.12	CCDC66	1850	19	4.76254	3.98947	2.58109e-07	0.000130121
log-likelihoods	prom	chr22	gencode::AC008132.1::ENSG00000182824.6	AC008132.1	857	13	2.10529	6.17493	3.11351e-07	0.000152937
log-likelihoods	prom	chr22	gencode::CRELD2::ENSG00000184164.10	CRELD2	629	14	2.2659	6.17856	3.91106e-07	0.000187311
log-likelihoods	prom	chr9	gencode::AQP7::ENSG00000165269.8	AQP7	862	12	2.53997	4.72447	8.11456e-07	0.000379148
log-likelihoods	prom	chr19	gencode::FEM1A::ENSG00000141965.3	FEM1A	500	13	1.91912	6.77394	9.13465e-07	0.000416649
log-likelihoods	prom	chr9	gencode::FAM221B::ENSG00000204930.5	FAM221B	723	11	2.17748	5.05171	1.15759e-06	0.000515719
log-likelihoods	prom	chr8	gencode::VCPIP1::ENSG00000175073.7	VCPIP1	412	14	1.27392	10.9897	1.95895e-06	0.0008529
log-likelihoods	prom	chr3	gencode::MUC4::ENSG00000145113.17	MUC4	876	16	3.42881	4.66634	2.06126e-06	0.0008775
log-likelihoods	prom	chr6	gencode::HLA-DQA1::ENSG00000196735.7	HLA-DQA1	877	21	4.58242	4.58273	2.2697e-06	0.000934228
log-likelihoods	prom	chr15	gencode::ANXA2::ENSG00000182718.12	ANXA2	883	13	2.65205	4.90186	2.31979e-06	0.000934228
log-likelihoods	prom	chr5	gencode::PCDHGA8::ENSG00000253767.1	PCDHGA8	500	6	0.630098	9.52233	2.34081e-06	0.000934228
log-likelihoods	prom	chr16	gencode::TPSAB1::ENSG00000172236.12	TPSAB1	649	11	2.30939	4.76316	2.50138e-06	0.000977937
log-likelihoods	prom	chr7	gencode::SSBP1::ENSG00000106028.6	SSBP1	700	12	3.09203	3.88094	2.65829e-06	0.0010185
log-likelihoods	prom	chr17	gencode::NCOR1::ENSG00000141027.16	NCOR1	2447	21	6.43789	3.26194	2.92108e-06	0.00109724
log-likelihoods	prom	chr19	gencode::FXYD3::ENSG00000089356.12	FXYD3	3776	28	9.32306	3.00331	3.18318e-06	0.0011727
log-likelihoods	prom	chr12	gencode::CCDC77::ENSG00000120647.5	CCDC77	1388	15	3.37676	4.44213	3.89293e-06	0.00140711
log-likelihoods	prom	chr2	gencode::ASXL2::ENSG00000143970.12	ASXL2	1634	18	4.40401	4.08719	5.69498e-06	0.00202035
log-likelihoods	prom	chr9	gencode::RP11-160N1.10::ENSG00000204814.5	RP11-160N1.10	1605	30	12.4893	2.40205	5.93433e-06	0.00206698
log-likelihoods	prom	chr7	gencode::DGKI::ENSG00000157680.11	DGKI	923	18	5.08524	3.53965	6.30319e-06	0.00215625
log-likelihoods	prom	chr17	gencode::LRRC45::ENSG00000169683.3	LRRC45	405	11	1.48489	7.40798	8.46191e-06	0.00284394
log-likelihoods	prom	chr5	gencode::AC026740.1::ENSG00000268885.1	AC026740.1	737	10	2.43946	4.09926	8.76708e-06	0.00289571
log-likelihoods	prom	chr19	gencode::GNA15::ENSG00000060558.3	GNA15	595	11	1.80913	6.08028	9.6002e-06	0.00311714
log-likelihoods	prom	chr1	gencode::C1orf194::ENSG00000179902.8	C1orf194	1284	14	4.18295	3.34692	1.09373e-05	0.00349209
log-likelihoods	prom	chr19	gencode::ARHGEF18::ENSG00000104880.13	ARHGEF18	1363	19	4.06679	4.67199	1.32903e-05	0.00417379
log-likelihoods	prom	chr3	gencode::TRAIP::ENSG00000183763.4	TRAIP	786	13	2.20777	5.8883	1.51142e-05	0.00461755
log-likelihoods	prom	chr1	gencode::NBPF15::ENSG00000243452.3	NBPF15	872	10	2.6822	3.72828	1.51853e-05	0.00461755
log-likelihoods	prom	chr22	gencode::CECR6::ENSG00000183307.3	CECR6	227	11	1.59583	6.89296	1.82464e-05	0.00538122
log-likelihoods	prom	chr8	gencode::C8orf44-SGK3::ENSG00000270024.1	C8orf44-SGK3	810	16	2.21402	7.22669	1.82586e-05	0.00538122
log-likelihoods	prom	chr11	gencode::OR51F2::ENSG00000176925.5	OR51F2	500	13	2.33123	5.57645	1.99233e-05	0.00578289
log-likelihoods	prom	chr1	gencode::BRDT::ENSG00000137948.14	BRDT	1588	21	4.5172	4.6489	2.07107e-05	0.00591862
log-likelihoods	prom	chr1	gencode::LEPR::ENSG00000116678.14	LEPR	1913	19	5.53542	3.43244	2.1011e-05	0.00591862
log-likelihoods	prom	chr9	gencode::CCDC107::ENSG00000159884.7	CCDC107	736	10	2.11014	4.73901	2.13178e-05	0.00591862
log-likelihoods	prom	chr11	gencode::AP003733.1::ENSG00000269089.1	AP003733.1	320	10	1.36785	7.31074	2.39272e-05	0.00654819
log-likelihoods	prom	chr11	gencode::OR9G1::ENSG00000174914.1	OR9G1	500	11	2.47851	4.43815	2.46073e-05	0.00663945
log-likelihoods	prom	chr1	gencode::PRAMEF20::ENSG00000204478.5	PRAMEF20	1608	31	3.46711	8.94117	2.56862e-05	0.00683432
log-likelihoods	prom	chr11	gencode::IFITM3::ENSG00000142089.11	IFITM3	1394	14	3.68588	3.79828	2.81687e-05	0.00739216
log-likelihoods	prom	chr7	gencode::TBL2::ENSG00000106638.11	TBL2	1032	12	3.16007	3.79738	2.8862e-05	0.00747175
log-likelihoods	prom	chr1	gencode::TRAF3IP3::ENSG00000009790.10	TRAF3IP3	3053	24	6.30629	3.80573	3.06888e-05	0.00783874
log-likelihoods	prom	chr2	gencode::MYT1L::ENSG00000186487.13	MYT1L	1728	27	9.041	2.9864	3.13157e-05	0.00787386
log-likelihoods	prom	chr22	gencode::RNF185::ENSG00000138942.11	RNF185	937	12	2.91292	4.11958	3.16483e-05	0.00787386
log-likelihoods	prom	chr5	gencode::HAPLN1::ENSG00000145681.6	HAPLN1	1284	18	4.6637	3.8596	3.27215e-05	0.00803648
log-likelihoods	prom	chr14	gencode::NUMB::ENSG00000133961.15	NUMB	3236	22	7.38455	2.97919	3.40558e-05	0.00816724
log-likelihoods	prom	chr8	gencode::RP11-67H2.1::ENSG00000253207.3	RP11-67H2.1	869	18	4.98103	3.61371	3.41065e-05	0.00816724
log-likelihoods	prom	chr3	gencode::DPH3::ENSG00000154813.5	DPH3	523	10	1.75607	5.69455	3.58069e-05	0.00846856
log-likelihoods	prom	chr16	gencode::SPN::ENSG00000197471.7	SPN	1050	13	2.77359	4.68706	4.65047e-05	0.0108645
log-likelihoods	prom	chr14	gencode::PRMT5::ENSG00000100462.11	PRMT5	808	11	2.15695	5.09979	4.85374e-05	0.0111437
log-likelihoods	prom	chr6	gencode::LGSN::ENSG00000146166.12	LGSN	934	13	2.76632	4.69939	4.89754e-05	0.0111437
log-likelihoods	prom	chr1	gencode::LYPD8::ENSG00000266949.1	LYPD8	565	7	1.02308	6.84205	4.94447e-05	0.0111437
log-likelihoods	prom	chr10	gencode::ANKRD16::ENSG00000134461.11	ANKRD16	382	8	1.0767	7.4301	5.62596e-05	0.0125322
log-likelihoods	prom	chr7	gencode::MUC3A::ENSG00000228273.2	MUC3A	937	7	1.52346	4.59479	6.10612e-05	0.0134454
log-likelihoods	prom	chr17	gencode::RPH3AL::ENSG00000181031.11	RPH3AL	902	6	1.36612	4.39201	6.58362e-05	0.0143321
log-likelihoods	prom	chr7	gencode::C7orf55::ENSG00000164898.8	C7orf55	607	7	1.20473	5.81044	6.66629e-05	0.014349
log-likelihoods	prom	chr12	gencode::WNT5B::ENSG00000111186.8	WNT5B	3405	23	8.36801	2.74856	6.84647e-05	0.0144548
log-likelihoods	prom	chr22	gencode::AC006946.15::ENSG00000235478.1	AC006946.15	280	11	1.85813	5.91994	6.86633e-05	0.0144548
log-likelihoods	prom	chr19	gencode::ZNF578::ENSG00000258405.5	ZNF578	966	17	6.32868	2.68619	7.48552e-05	0.015569
log-likelihoods	prom	chr3	gencode::SEMA3G::ENSG00000010319.2	SEMA3G	883	9	2.24676	4.00577	7.55815e-05	0.015569
log-likelihoods	prom	chr11	gencode::GLYAT::ENSG00000149124.6	GLYAT	1803	23	7.33254	3.1367	8.07469e-05	0.0164561
log-likelihoods	prom	chr19	gencode::AP3D1::ENSG00000065000.11	AP3D1	696	12	2.21537	5.41669	8.55657e-05	0.0172546
log-likelihoods	prom	chr3	gencode::CD86::ENSG00000114013.11	CD86	1723	21	6.12056	3.43106	8.90339e-05	0.0177538
log-likelihoods	prom	chr1	gencode::SESN2::ENSG00000130766.4	SESN2	587	12	1.82124	6.58892	8.98948e-05	0.0177538
log-likelihoods	prom	chr11	gencode::OR8K5::ENSG00000181752.3	OR8K5	500	12	2.55792	4.69131	9.08249e-05	0.0177544
log-likelihoods	prom	chr9	gencode::GOLGA2::ENSG00000167110.12	GOLGA2	633	11	1.78383	6.1665	9.20132e-05	0.017805
log-likelihoods	prom	chr19	gencode::MED16::ENSG00000175221.10	MED16	1692	16	4.83205	3.31123	0.000123319	0.0235333
log-likelihoods	prom	chr16	gencode::AC040160.1::ENSG00000237102.2	AC040160.1	640	9	1.61488	5.57316	0.000124606	0.0235333
log-likelihoods	prom	chr6	gencode::C6orf100::ENSG00000204709.4	C6orf100	691	12	3.39788	3.53161	0.000125301	0.0235333
log-likelihoods	prom	chr22	gencode::AC002472.1::ENSG00000269103.1	AC002472.1	829	8	1.47386	5.42792	0.000131259	0.024238
log-likelihoods	prom	chr21	gencode::TPTE::ENSG00000166157.12	TPTE	878	23	8.56689	2.68475	0.000131584	0.024238
log-likelihoods	prom	chr4	gencode::SRP72::ENSG00000174780.11	SRP72	871	12	3.44148	3.48688	0.000140361	0.0256085
log-likelihoods	prom	chr11	gencode::PAAF1::ENSG00000175575.8	PAAF1	1897	14	3.10641	4.50681	0.000156662	0.028313
log-likelihoods	prom	chr18	gencode::ATP8B1::ENSG00000081923.6	ATP8B1	1693	14	4.85949	2.88096	0.000158933	0.0284549
log-likelihoods	prom	chr22	gencode::ALG12::ENSG00000182858.9	ALG12	536	9	1.93666	4.64717	0.000162075	0.0287488
log-likelihoods	prom	chr19	gencode::TMEM160::ENSG00000130748.6	TMEM160	774	11	2.64971	4.1514	0.000170681	0.0297191
log-likelihoods	prom	chr12	gencode::OR9K2::ENSG00000170605.5	OR9K2	500	10	2.19586	4.55403	0.000171574	0.0297191
log-likelihoods	prom	chr18	gencode::SERPINB7::ENSG00000166396.8	SERPINB7	2574	24	8.02267	2.99152	0.000173236	0.0297191
log-likelihoods	prom	chr1	gencode::SLAMF1::ENSG00000117090.10	SLAMF1	846	15	3.24957	4.616	0.000173751	0.0297191
log-likelihoods	prom	chr6	gencode::BTN2A2::ENSG00000124508.12	BTN2A2	892	10	3.11697	3.20824	0.000181585	0.0307843
log-likelihoods	prom	chr7	gencode::AKR1D1::ENSG00000122787.10	AKR1D1	863	12	2.83058	4.23941	0.000186905	0.0314082
log-likelihoods	prom	chr17	gencode::SEC14L1::ENSG00000129657.10	SEC14L1	3421	19	7.0021	2.71347	0.000196285	0.0326976
log-likelihoods	prom	chr3	gencode::DPPA4::ENSG00000121570.8	DPPA4	889	18	5.79591	3.10564	0.000206244	0.0340605
log-likelihoods	prom	chr14	gencode::VIPAS39::ENSG00000151445.11	VIPAS39	420	9	1.632	5.51471	0.000211399	0.0346134
log-likelihoods	prom	chr17	gencode::STRA13::ENSG00000169689.10	STRA13	827	12	2.67821	4.4806	0.000214241	0.0346187
log-likelihoods	prom	chr4	gencode::MAPK10::ENSG00000109339.14	MAPK10	3700	36	11.9074	3.02332	0.000215046	0.0346187
log-likelihoods	prom	chr19	gencode::ZNF253::ENSG00000256771.2	ZNF253	905	18	3.98245	4.51983	0.000217753	0.0347624
log-likelihoods	prom	chr17	gencode::TP53::ENSG00000141510.11	TP53	688	7	1.11413	6.2829	0.000226721	0.0358949
log-likelihoods	prom	chr9	gencode::OR1L1::ENSG00000173679.2	OR1L1	500	10	1.96019	5.10156	0.000245819	0.0384108
log-likelihoods	prom	chr18	gencode::RP11-683L23.1::ENSG00000173213.7	RP11-683L23.1	926	14	5.55355	2.52091	0.000246622	0.0384108
log-likelihoods	prom	chr6	gencode::PRPH2::ENSG00000112619.6	PRPH2	500	7	1.28833	5.43337	0.000250275	0.0386654
log-likelihoods	prom	chr20	gencode::DEFB129::ENSG00000125903.4	DEFB129	909	11	2.96678	3.70773	0.000268952	0.0412185
log-likelihoods	prom	chr1	gencode::SH2D2A::ENSG00000027869.7	SH2D2A	838	8	1.95055	4.10141	0.000289171	0.0439655
log-likelihoods	prom	chr6	gencode::CLDN20::ENSG00000171217.5	CLDN20	722	8	1.37136	5.83364	0.000293386	0.0442551
log-likelihoods	prom	chr16	gencode::KATNB1::ENSG00000140854.8	KATNB1	872	12	2.46127	4.87553	0.000296569	0.0443857
log-likelihoods	prom	chr5	gencode::RP11-1C1.5::ENSG00000249160.1	RP11-1C1.5	860	9	2.50474	3.59318	0.000326746	0.048523
log-likelihoods	prom	chr6	gencode::TUBB2A::ENSG00000137267.5	TUBB2A	878	5	1.16104	4.30647	0.000341502	0.0503178
log-likelihoods	prom	chr1	gencode::CDK11B::ENSG00000248333.3	CDK11B	1097	7	1.56583	4.47048	0.000344085	0.0503178
log-likelihoods	prom	chr20	gencode::SIRPG::ENSG00000089012.10	SIRPG	1769	20	5.48264	3.64788	0.00035108	0.0509519
log-likelihoods	prom	chr11	gencode::OR8H3::ENSG00000181761.5	OR8H3	500	10	2.51925	3.96943	0.000380573	0.0548168
log-likelihoods	prom	chr1	gencode::S100A7A::ENSG00000184330.7	S100A7A	2038	20	6.06149	3.29952	0.00039093	0.0551122
log-likelihoods	prom	chr11	gencode::CCDC73::ENSG00000186714.8	CCDC73	736	9	2.28689	3.93547	0.00039121	0.0551122
log-likelihoods	prom	chr3	gencode::LRRC2::ENSG00000163827.8	LRRC2	1340	14	5.05798	2.7679	0.000391254	0.0551122
log-likelihoods	prom	chr2	gencode::GCG::ENSG00000115263.10	GCG	752	11	2.97463	3.69794	0.000397487	0.0553285
log-likelihoods	prom	chr8	gencode::MSR1::ENSG00000038945.10	MSR1	2717	30	12.3973	2.41988	0.000398566	0.0553285
log-likelihoods	prom	chr11	gencode::FTH1::ENSG00000167996.11	FTH1	783	11	2.30572	4.77074	0.000405398	0.055872
log-likelihoods	prom	chr7	gencode::SPDYE1::ENSG00000136206.3	SPDYE1	602	6	1.05842	5.6688	0.000413433	0.0565724
log-likelihoods	prom	chr19	gencode::CGB2::ENSG00000104818.14	CGB2	871	14	3.09276	4.5267	0.000428447	0.0578761
log-likelihoods	prom	chr12	gencode::DEPDC4::ENSG00000166153.12	DEPDC4	642	13	3.15024	4.12666	0.000429003	0.0578761
log-likelihoods	prom	chr1	gencode::C1orf185::ENSG00000204006.4	C1orf185	928	13	2.67778	4.85476	0.000435538	0.0583469
log-likelihoods	prom	chr8	gencode::C8orf44::ENSG00000213865.3	C8orf44	1778	19	4.42429	4.29447	0.000450379	0.0599161
log-likelihoods	prom	chr22	gencode::CACNA1I::ENSG00000100346.13	CACNA1I	738	13	3.23121	4.02326	0.000463031	0.0609611
log-likelihoods	prom	chr3	gencode::OXNAD1::ENSG00000154814.9	OXNAD1	1598	14	3.94559	3.54827	0.000464599	0.0609611
log-likelihoods	prom	chr1	gencode::SLC44A5::ENSG00000137968.12	SLC44A5	1897	26	8.10209	3.20905	0.000494942	0.0640958
log-likelihoods	prom	chr2	gencode::TIA1::ENSG00000116001.11	TIA1	948	6	1.25182	4.79301	0.000495181	0.0640958
log-likelihoods	prom	chr5	gencode::PCDHGB4::ENSG00000253953.1	PCDHGB4	500	4	0.659195	6.068	0.000503004	0.0646715
log-likelihoods	prom	chr7	gencode::GALNTL5::ENSG00000106648.9	GALNTL5	783	10	2.87074	3.48342	0.000511334	0.0649163
log-likelihoods	prom	chr12	gencode::AC226150.4::ENSG00000255748.1	AC226150.4	500	9	2.39536	3.75726	0.000511686	0.0649163
log-likelihoods	prom	chr11	gencode::OR52E8::ENSG00000183269.5	OR52E8	500	9	2.44391	3.68262	0.000524517	0.0661064
log-likelihoods	prom	chr2	gencode::RESP18::ENSG00000182698.7	RESP18	1310	14	3.67745	3.80698	0.000589608	0.0737847
log-likelihoods	prom	chr13	gencode::METTL21C::ENSG00000139780.7	METTL21C	862	10	3.14241	3.18227	0.000593143	0.0737847
log-likelihoods	prom	chr11	gencode::OR4A15::ENSG00000181958.3	OR4A15	500	10	2.6641	3.75362	0.000644936	0.0797099
log-likelihoods	prom	chr9	gencode::TNFSF8::ENSG00000106952.3	TNFSF8	689	8	2.27386	3.51825	0.000665913	0.081775
log-likelihoods	prom	chr10	gencode::NPY4R::ENSG00000204174.2	NPY4R	1634	14	5.11594	2.73655	0.000680452	0.0827791
log-likelihoods	prom	chr19	gencode::CCDC124::ENSG00000007080.6	CCDC124	1867	15	4.73373	3.16875	0.000683517	0.0827791
log-likelihoods	prom	chr17	gencode::C1QTNF1::ENSG00000173918.10	C1QTNF1	4406	24	9.62894	2.49249	0.00068821	0.0827791
log-likelihoods	prom	chr21	gencode::ITGB2::ENSG00000160255.12	ITGB2	3169	18	7.04396	2.55538	0.000694134	0.0827791
log-likelihoods	prom	chr7	gencode::TYW1B::ENSG00000254184.3	TYW1B	1627	21	5.95196	3.52825	0.000695696	0.0827791
log-likelihoods	prom	chr19	gencode::PSG6::ENSG00000170848.11	PSG6	1389	14	4.42339	3.16499	0.000712708	0.0836422
log-likelihoods	prom	chr2	gencode::NYAP2::ENSG00000144460.10	NYAP2	1360	15	4.46874	3.35665	0.000717563	0.0836422
log-likelihoods	prom	chr10	gencode::TCTN3::ENSG00000119977.16	TCTN3	663	9	2.46087	3.65724	0.000717781	0.0836422
log-likelihoods	prom	chr16	gencode::CLUAP1::ENSG00000103351.8	CLUAP1	2710	17	6.14006	2.7687	0.0007245	0.0836422
log-likelihoods	prom	chr2	gencode::FABP1::ENSG00000163586.5	FABP1	899	11	3.11141	3.53537	0.00072478	0.0836422
log-likelihoods	prom	chr5	gencode::F12::ENSG00000131187.5	F12	863	7	2.27466	3.07739	0.000730975	0.083852
log-likelihoods	prom	chr1	gencode::CRP::ENSG00000132693.8	CRP	782	11	2.90277	3.78949	0.000746519	0.0851254
log-likelihoods	prom	chr11	gencode::LDHAL6A::ENSG00000166800.5	LDHAL6A	500	8	1.45473	5.49929	0.000761404	0.086309
log-likelihoods	prom	chr1	gencode::APCS::ENSG00000132703.3	APCS	611	11	3.04022	3.61816	0.000771198	0.0869049
log-likelihoods	prom	chr1	gencode::CDC20::ENSG00000117399.9	CDC20	593	9	2.24266	4.01309	0.000784099	0.087842
log-likelihoods	prom	chr19	gencode::CASP14::ENSG00000105141.4	CASP14	1659	18	6.6527	2.70567	0.000788705	0.0878443
log-likelihoods	prom	chr12	gencode::BEST3::ENSG00000127325.14	BEST3	1708	16	5.43278	2.94508	0.000799535	0.0885358
log-likelihoods	prom	chr1	gencode::ADAR::ENSG00000160710.11	ADAR	1671	12	4.74566	2.52863	0.000851238	0.0937193
log-likelihoods	prom	chr21	gencode::AP001468.1::ENSG00000235878.4	AP001468.1	891	7	2.09842	3.33584	0.000887325	0.0971342
log-likelihoods	prom	chr3	gencode::PRR23B::ENSG00000184814.5	PRR23B	500	7	1.88299	3.71749	0.0008986	0.0976858
log-likelihoods	prom	chr10	gencode::FBXO18::ENSG00000134452.15	FBXO18	1578	13	3.39829	3.82545	0.000902562	0.0976858
log-likelihoods	prom	chr19	gencode::LILRB2::ENSG00000131042.9	LILRB2	1173	14	4.22696	3.31208	0.000945744	0.10168
log-likelihoods	prom	chr5	gencode::PCDHGB2::ENSG00000253910.1	PCDHGB2	500	4	0.637008	6.27935	0.000950078	0.10168
log-likelihoods	prom	chr17	gencode::ZNF750::ENSG00000141579.6	ZNF750	902	7	1.89575	3.69248	0.000965544	0.102761
log-likelihoods	prom	chr6	gencode::GFRAL::ENSG00000187871.2	GFRAL	890	13	3.6769	3.53558	0.000994173	0.105223
log-likelihoods	prom	chr11	gencode::OR5T3::ENSG00000172489.5	OR5T3	500	9	2.36682	3.80257	0.00101281	0.106607
log-likelihoods	prom	chr20	gencode::SPAG4::ENSG00000061656.5	SPAG4	582	7	1.87812	3.72714	0.00102185	0.10697
log-likelihoods	prom	chr7	gencode::MCM7::ENSG00000166508.13	MCM7	614	6	0.984466	6.09467	0.00103735	0.108002
log-likelihoods	prom	chr3	gencode::AC007919.2::ENSG00000269496.1	AC007919.2	742	7	1.5099	4.63607	0.00104655	0.108372
log-likelihoods	prom	chr19	gencode::ZNF324::ENSG00000083812.7	ZNF324	811	11	2.408	4.5681	0.00106929	0.109735
log-likelihoods	prom	chr1	gencode::OR2AJ1::ENSG00000177275.3	OR2AJ1	500	9	2.48054	3.62824	0.00107117	0.109735
log-likelihoods	prom	chr16	gencode::TMEM208::ENSG00000168701.14	TMEM208	695	8	1.7318	4.61948	0.00108306	0.110363
log-likelihoods	prom	chr3	gencode::RP11-159G9.5::ENSG00000229729.3	RP11-159G9.5	510	6	1.17302	5.115	0.00110187	0.111685
log-likelihoods	prom	chr17	gencode::ATP5H::ENSG00000167863.7	ATP5H	718	9	2.03342	4.42605	0.00110988	0.111905
log-likelihoods	prom	chr15	gencode::SLC24A5::ENSG00000188467.6	SLC24A5	856	11	2.86144	3.84422	0.00112921	0.113258
log-likelihoods	prom	chr19	gencode::ZNF728::ENSG00000269067.1	ZNF728	849	18	6.5069	2.76629	0.00114015	0.11376
log-likelihoods	prom	chr2	gencode::LYPD6B::ENSG00000150556.12	LYPD6B	3682	33	14.6179	2.25751	0.00115141	0.114278
log-likelihoods	prom	chr6	gencode::OR2A4::ENSG00000180658.2	OR2A4	500	7	1.75125	3.99714	0.00115727	0.114278
log-likelihoods	prom	chr10	gencode::GAD2::ENSG00000136750.7	GAD2	1488	20	10.9125	1.83276	0.00119007	0.116914
log-likelihoods	prom	chr4	gencode::PF4::ENSG00000163737.3	PF4	736	8	2.47781	3.22866	0.00124028	0.120387
log-likelihoods	prom	chr15	gencode::AC010760.1::ENSG00000269182.1	AC010760.1	973	12	4.81717	2.49109	0.00124349	0.120387
log-likelihoods	prom	chr1	gencode::ARV1::ENSG00000173409.9	ARV1	508	8	2.00323	3.99354	0.00124427	0.120387
log-likelihoods	prom	chr1	gencode::FCGR3A::ENSG00000203747.5	FCGR3A	1850	18	6.58067	2.73528	0.00125406	0.120724
log-likelihoods	prom	chr11	gencode::SPATA19::ENSG00000166118.3	SPATA19	804	13	3.92135	3.31518	0.00132029	0.126289
log-likelihoods	prom	chr14	gencode::AL627171.1::ENSG00000197502.1	AL627171.1	965	8	1.97153	4.05777	0.00132998	0.126289
log-likelihoods	prom	chr13	gencode::MYO16::ENSG00000041515.11	MYO16	2345	23	9.53869	2.41123	0.00133165	0.126289
log-likelihoods	prom	chr16	gencode::HBZ::ENSG00000130656.4	HBZ	680	7	2.14382	3.2652	0.00137258	0.129529
log-likelihoods	prom	chr19	gencode::CNOT3::ENSG00000088038.13	CNOT3	1237	14	3.56733	3.9245	0.00139899	0.131375
log-likelihoods	prom	chr16	gencode::FBXO31::ENSG00000103264.11	FBXO31	645	8	2.05649	3.89013	0.00142717	0.132808
log-likelihoods	prom	chr12	gencode::NOS1::ENSG00000089250.14	NOS1	815	10	3.25348	3.07363	0.00142812	0.132808
log-likelihoods	prom	chr15	gencode::SNRPN::ENSG00000128739.16	SNRPN	3066	29	11.6416	2.49106	0.00146302	0.135396
log-likelihoods	prom	chr19	gencode::TOMM40::ENSG00000130204.8	TOMM40	544	8	1.82358	4.38697	0.00148765	0.137014
log-likelihoods	prom	chr3	gencode::P2RY14::ENSG00000174944.4	P2RY14	1565	10	2.76312	3.6191	0.00153337	0.140549
log-likelihoods	prom	chr11	gencode::SCGB2A1::ENSG00000124939.4	SCGB2A1	879	10	2.52183	3.96538	0.00155163	0.141546
log-likelihoods	prom	chr6	gencode::RPP40::ENSG00000124787.9	RPP40	1144	10	4.31293	2.31861	0.00159241	0.144577
log-likelihoods	prom	chr11	gencode::HINFP::ENSG00000172273.8	HINFP	974	10	3.06738	3.26012	0.0016024	0.144798
log-likelihoods	prom	chr7	gencode::CPVL::ENSG00000106066.9	CPVL	1143	12	4.84651	2.47601	0.00163911	0.14742
log-likelihoods	prom	chr1	gencode::NBPF9::ENSG00000168614.13	NBPF9	983	10	3.42704	2.91797	0.00169739	0.151948
log-likelihoods	prom	chr6	gencode::CDYL::ENSG00000153046.13	CDYL	3180	16	5.47939	2.92003	0.0017095	0.15232
log-likelihoods	prom	chr14	gencode::VSX2::ENSG00000119614.2	VSX2	538	8	1.74061	4.59608	0.00171984	0.152533
log-likelihoods	prom	chr19	gencode::USP29::ENSG00000131864.6	USP29	1311	20	8.0648	2.47991	0.00175207	0.154675
log-likelihoods	prom	chr2	gencode::SLC8A1::ENSG00000183023.14	SLC8A1	3189	28	13.1036	2.13682	0.00180803	0.158343
log-likelihoods	prom	chr7	gencode::AC145676.2::ENSG00000249852.1	AC145676.2	500	4	0.776679	5.15014	0.00181015	0.158343
log-likelihoods	prom	chr3	gencode::CPB1::ENSG00000153002.7	CPB1	1509	16	6.2244	2.57053	0.00183454	0.159746
log-likelihoods	prom	chr14	gencode::OR4K17::ENSG00000176230.4	OR4K17	500	9	2.07726	4.33264	0.0018582	0.161075
log-likelihoods	prom	chr1	gencode::S100A7::ENSG00000143556.4	S100A7	1672	15	4.60724	3.25575	0.00188576	0.162024
log-likelihoods	prom	chr20	gencode::ACSS2::ENSG00000131069.15	ACSS2	1758	13	4.15626	3.12781	0.00188607	0.162024
log-likelihoods	prom	chr6	gencode::WISP3::ENSG00000112761.14	WISP3	2377	17	6.18131	2.75023	0.00191726	0.163969
log-likelihoods	prom	chr12	gencode::CLEC4E::ENSG00000166523.3	CLEC4E	885	9	3.04487	2.95579	0.0019321	0.164463
log-likelihoods	prom	chr7	gencode::OR2A2::ENSG00000221989.2	OR2A2	500	8	1.97184	4.05713	0.00196036	0.164463
log-likelihoods	prom	chr2	gencode::SLC1A4::ENSG00000115902.6	SLC1A4	1278	11	4.08711	2.69139	0.00196516	0.164463
log-likelihoods	prom	chr20	gencode::MOCS3::ENSG00000124217.3	MOCS3	305	6	1.03166	5.81588	0.00197474	0.164463
log-likelihoods	prom	chr12	gencode::CD163::ENSG00000177575.8	CD163	1752	15	5.34008	2.80894	0.00197883	0.164463
log-likelihoods	prom	chr22	gencode::CYTH4::ENSG00000100055.16	CYTH4	896	8	2.40788	3.32242	0.00198174	0.164463
log-likelihoods	prom	chr6	gencode::DPPA5::ENSG00000203909.3	DPPA5	632	9	2.93742	3.06391	0.00198313	0.164463
log-likelihoods	prom	chr12	gencode::SCYL2::ENSG00000136021.13	SCYL2	427	10	2.25087	4.44273	0.00201124	0.165324
log-likelihoods	prom	chr5	gencode::CENPH::ENSG00000153044.5	CENPH	803	9	2.56387	3.51032	0.00202653	0.165324
log-likelihoods	prom	chr14	gencode::AHSA1::ENSG00000100591.3	AHSA1	654	9	2.23841	4.02072	0.00202892	0.165324
log-likelihoods	prom	chr1	gencode::SPRR2E::ENSG00000203785.4	SPRR2E	1898	19	7.45596	2.5483	0.00203539	0.165324
log-likelihoods	prom	chr9	gencode::KIF24::ENSG00000186638.11	KIF24	1305	10	3.20763	3.11756	0.00203667	0.165324
log-likelihoods	prom	chr19	gencode::OR10H2::ENSG00000171942.3	OR10H2	500	9	2.07242	4.34275	0.00204631	0.165406
log-likelihoods	prom	chr17	gencode::ALYREF::ENSG00000183684.6	ALYREF	378	8	1.9108	4.18673	0.00209955	0.168996
log-likelihoods	prom	chr10	gencode::TUBB8::ENSG00000173876.9	TUBB8	901	14	5.3089	2.63708	0.00212036	0.169801
log-likelihoods	prom	chr7	gencode::HOXA3::ENSG00000105997.18	HOXA3	1781	12	4.78145	2.5097	0.00212728	0.169801
log-likelihoods	prom	chr2	gencode::MROH2A::ENSG00000185038.10	MROH2A	846	11	2.98036	3.69082	0.002172	0.172651
log-likelihoods	prom	chr9	gencode::TXNDC8::ENSG00000204193.6	TXNDC8	962	9	2.66012	3.38331	0.00218365	0.17286
log-likelihoods	prom	chr11	gencode::OR4C46::ENSG00000185926.1	OR4C46	500	9	2.73694	3.28835	0.0022104	0.173825
log-likelihoods	prom	chr5	gencode::PCDHA6::ENSG00000081842.13	PCDHA6	500	5	1.0239	4.88328	0.00222901	0.173825
log-likelihoods	prom	chr15	gencode::IQGAP1::ENSG00000140575.8	IQGAP1	862	9	2.37561	3.7885	0.00223669	0.173825
log-likelihoods	prom	chr12	gencode::ACSM4::ENSG00000215009.5	ACSM4	749	10	2.40309	4.1613	0.00224606	0.173825
log-likelihoods	prom	chr18	gencode::HAUS1::ENSG00000152240.8	HAUS1	859	8	2.43565	3.28455	0.00225093	0.173825
log-likelihoods	prom	chr1	gencode::OR2L13::ENSG00000196071.3	OR2L13	1675	23	10.2406	2.24596	0.0022568	0.173825
log-likelihoods	prom	chr22	gencode::APOL4::ENSG00000100336.13	APOL4	882	8	2.40576	3.32535	0.00225935	0.173825
log-likelihoods	prom	chr11	gencode::GLYATL2::ENSG00000156689.2	GLYATL2	905	10	3.14767	3.17696	0.00229468	0.175167
log-likelihoods	prom	chr19	gencode::PCSK4::ENSG00000115257.11	PCSK4	747	10	2.69509	3.71046	0.00229516	0.175167
log-likelihoods	prom	chr17	gencode::KRTAP9-9::ENSG00000198083.7	KRTAP9-9	500	7	1.737	4.02994	0.00231304	0.175167
log-likelihoods	prom	chr11	gencode::TRIM49B::ENSG00000182053.8	TRIM49B	974	14	4.66825	2.99898	0.00231338	0.175167
log-likelihoods	prom	chr1	gencode::BAI2::ENSG00000121753.8	BAI2	3362	18	8.01176	2.2467	0.00239629	0.180731
log-likelihoods	prom	chr16	gencode::PAQR4::ENSG00000162073.9	PAQR4	1312	9	3.24636	2.77234	0.00243938	0.183259
log-likelihoods	prom	chr12	gencode::PDE1B::ENSG00000123360.7	PDE1B	1864	12	4.29974	2.79087	0.0024581	0.183945
log-likelihoods	prom	chr1	gencode::SYF2::ENSG00000117614.5	SYF2	843	11	3.04542	3.61198	0.0024837	0.185137
log-likelihoods	prom	chr1	gencode::TTC13::ENSG00000143643.8	TTC13	486	8	2.29983	3.47852	0.00250188	0.185769
log-likelihoods	prom	chr18	gencode::DCC::ENSG00000187323.7	DCC	2054	26	11.114	2.33938	0.00253038	0.18648
log-likelihoods	prom	chr14	gencode::OR4N2::ENSG00000176294.3	OR4N2	500	8	2.61904	3.05455	0.00253092	0.18648
log-likelihoods	prom	chr3	gencode::P2RY12::ENSG00000169313.9	P2RY12	711	6	1.24491	4.81964	0.00258718	0.189895
log-likelihoods	prom	chr1	gencode::MTMR11::ENSG00000014914.15	MTMR11	1030	10	3.30104	3.02935	0.00261719	0.190772
log-likelihoods	prom	chr1	gencode::SPRR2B::ENSG00000196805.6	SPRR2B	2175	23	9.24158	2.48875	0.00261905	0.190772
log-likelihoods	prom	chr19	gencode::TEX101::ENSG00000131126.14	TEX101	2502	21	7.54741	2.78241	0.00264428	0.19149
log-likelihoods	prom	chr5	gencode::PCDHA13::ENSG00000239389.3	PCDHA13	500	5	1.08501	4.60823	0.00264889	0.19149
log-likelihoods	prom	chr5	gencode::PCDHGA3::ENSG00000254245.1	PCDHGA3	500	5	0.644851	7.75373	0.00273594	0.197039
log-likelihoods	prom	chr6	gencode::Z98049.1::ENSG00000269048.1	Z98049.1	500	6	1.42202	4.21936	0.00276572	0.198438
log-likelihoods	prom	chr14	gencode::ISCA2::ENSG00000165898.9	ISCA2	517	9	1.94517	4.62684	0.00278765	0.199265
log-likelihoods	prom	chr11	gencode::KRTAP5-3::ENSG00000196224.7	KRTAP5-3	500	4	0.627562	6.37387	0.00279874	0.199314
log-likelihoods	prom	chr7	gencode::ANKMY2::ENSG00000106524.4	ANKMY2	511	8	2.02723	3.94628	0.00284159	0.201616
log-likelihoods	prom	chr1	gencode::UTP11L::ENSG00000183520.7	UTP11L	911	10	2.61505	3.82401	0.00286543	0.201657
log-likelihoods	prom	chr6	gencode::HIST1H2BJ::ENSG00000124635.7	HIST1H2BJ	404	8	1.9677	4.06567	0.00287149	0.201657
log-likelihoods	prom	chr21	gencode::KRTAP13-3::ENSG00000240432.3	KRTAP13-3	500	9	2.41083	3.73316	0.00287375	0.201657
log-likelihoods	prom	chr19	gencode::PSG3::ENSG00000221826.5	PSG3	841	10	3.12388	3.20115	0.00289589	0.202119
log-likelihoods	prom	chr19	gencode::LILRB4::ENSG00000186818.8	LILRB4	1389	17	6.43052	2.64365	0.00290983	0.202119
log-likelihoods	prom	chr7	gencode::GIMAP4::ENSG00000133574.5	GIMAP4	929	12	3.45344	3.4748	0.00291634	0.202119
log-likelihoods	prom	chr11	gencode::OR4P4::ENSG00000181927.2	OR4P4	500	9	2.18978	4.11001	0.00294973	0.202119
log-likelihoods	prom	chr5	gencode::SPINK14::ENSG00000196800.2	SPINK14	931	10	2.71192	3.68742	0.00295408	0.202119
log-likelihoods	prom	chr11	gencode::MMP13::ENSG00000137745.7	MMP13	632	8	2.37232	3.37223	0.00296347	0.202119
log-likelihoods	prom	chr1	gencode::DNTTIP2::ENSG00000067334.9	DNTTIP2	868	9	2.42451	3.71209	0.00296436	0.202119
log-likelihoods	prom	chr5	gencode::SEPP1::ENSG00000250722.1	SEPP1	1483	15	5.8283	2.57365	0.00296473	0.202119
log-likelihoods	prom	chr1	gencode::RPS27::ENSG00000177954.7	RPS27	808	9	2.3443	3.8391	0.00299702	0.203349
log-likelihoods	prom	chr7	gencode::RAMP3::ENSG00000122679.4	RAMP3	940	9	3.11469	2.88953	0.00301579	0.203349
log-likelihoods	prom	chr20	gencode::SIRPB2::ENSG00000196209.8	SIRPB2	876	9	2.47982	3.62929	0.00302124	0.203349
log-likelihoods	prom	chr14	gencode::C14orf159::ENSG00000133943.16	C14orf159	2600	15	6.69037	2.24203	0.00302524	0.203349
log-likelihoods	prom	chr3	gencode::IP6K1::ENSG00000176095.7	IP6K1	824	9	2.58606	3.4802	0.00304962	0.204271
log-likelihoods	prom	chr20	gencode::AL031663.1::ENSG00000268111.1	AL031663.1	983	9	2.29072	3.92889	0.00311587	0.207417
log-likelihoods	prom	chr19	gencode::FXYD1::ENSG00000266964.1	FXYD1	1588	13	4.98854	2.60597	0.00311824	0.207417
log-likelihoods	prom	chr6	gencode::HIST1H2AM::ENSG00000233224.1	HIST1H2AM	252	5	1.12461	4.446	0.00313947	0.20789
log-likelihoods	prom	chr19	gencode::GALP::ENSG00000197487.4	GALP	1825	18	7.5513	2.3837	0.00314705	0.20789
log-likelihoods	prom	chr7	gencode::STAG3::ENSG00000066923.13	STAG3	603	7	1.5007	4.66449	0.00317289	0.208041
log-likelihoods	prom	chr21	gencode::KRTAP12-1::ENSG00000187175.5	KRTAP12-1	500	8	1.74399	4.58717	0.00317613	0.208041
log-likelihoods	prom	chr19	gencode::CGB5::ENSG00000189052.6	CGB5	657	6	1.97913	3.03163	0.00318191	0.208041
log-likelihoods	prom	chr13	gencode::RNF17::ENSG00000132972.14	RNF17	1633	18	6.80661	2.64449	0.00320235	0.208665
log-likelihoods	prom	chr6	gencode::TOMM6::ENSG00000214736.3	TOMM6	626	6	1.58149	3.79389	0.00323108	0.209823
log-likelihoods	prom	chr7	gencode::AKR1B15::ENSG00000227471.4	AKR1B15	1816	17	6.04098	2.81411	0.00325969	0.210966
log-likelihoods	prom	chr22	gencode::PRR5::ENSG00000186654.16	PRR5	1429	13	3.40592	3.81688	0.00327953	0.211335
log-likelihoods	prom	chr8	gencode::REXO1L1::ENSG00000205176.2	REXO1L1	500	3	0.854478	3.51091	0.00328746	0.211335
log-likelihoods	prom	chr2	gencode::RPIA::ENSG00000153574.8	RPIA	658	7	2.23983	3.12523	0.00330811	0.211912
log-likelihoods	prom	chr11	gencode::MYEOV::ENSG00000172927.3	MYEOV	579	7	2.1067	3.32272	0.00332783	0.211912
log-likelihoods	prom	chr3	gencode::AC018816.3::ENSG00000235978.2	AC018816.3	1863	13	5.76174	2.25626	0.00332962	0.211912
log-likelihoods	prom	chr7	gencode::GIMAP1::ENSG00000213203.2	GIMAP1	864	11	3.53164	3.1147	0.00337163	0.213875
log-likelihoods	prom	chr6	gencode::HIST1H2AG::ENSG00000196787.2	HIST1H2AG	290	7	1.50599	4.64812	0.00339463	0.214565
log-likelihoods	prom	chr1	gencode::SLC25A44::ENSG00000160785.9	SLC25A44	866	8	2.3847	3.35472	0.00341486	0.214565
log-likelihoods	prom	chr9	gencode::IFNA17::ENSG00000234829.2	IFNA17	500	9	1.57286	5.72208	0.00341611	0.214565
log-likelihoods	prom	chr2	gencode::YIPF4::ENSG00000119820.6	YIPF4	673	7	1.85095	3.78185	0.00350723	0.219569
log-likelihoods	prom	chr1	gencode::LEFTY1::ENSG00000243709.1	LEFTY1	668	7	1.84699	3.78995	0.00356915	0.222717
log-likelihoods	prom	chr3	gencode::IQCF2::ENSG00000184345.4	IQCF2	854	8	2.84484	2.81211	0.00362972	0.225762
log-likelihoods	prom	chr11	gencode::EHF::ENSG00000135373.8	EHF	4268	22	9.85955	2.23134	0.00365183	0.226092
log-likelihoods	prom	chr5	gencode::TENM2::ENSG00000145934.11	TENM2	2366	22	9.45579	2.32662	0.00365863	0.226092
log-likelihoods	prom	chr1	gencode::ITLN1::ENSG00000179914.4	ITLN1	820	11	3.39849	3.23673	0.00368266	0.226845
log-likelihoods	prom	chr7	gencode::AC006372.1::ENSG00000236669.1	AC006372.1	500	7	2.45502	2.85131	0.00373818	0.229527
log-likelihoods	prom	chr11	gencode::OR5J2::ENSG00000174957.1	OR5J2	500	9	2.57409	3.49638	0.00375056	0.229551
log-likelihoods	prom	chr17	gencode::ABI3::ENSG00000108798.4	ABI3	567	5	1.31141	3.81268	0.00378722	0.231057
log-likelihoods	prom	chr15	gencode::RP11-597K23.2::ENSG00000259518.1	RP11-597K23.2	960	11	4.11755	2.67149	0.0038133	0.231633
log-likelihoods	prom	chr20	gencode::COL20A1::ENSG00000101203.12	COL20A1	1756	15	5.73952	2.61346	0.00382084	0.231633
log-likelihoods	prom	chr18	gencode::FECH::ENSG00000066926.6	FECH	897	11	2.84436	3.8673	0.00383496	0.231755
log-likelihoods	prom	chr9	gencode::OR1K1::ENSG00000165204.2	OR1K1	500	7	2.06285	3.39336	0.00385278	0.232099
log-likelihoods	prom	chr1	gencode::ADORA3::ENSG00000121933.13	ADORA3	1395	11	4.00384	2.74736	0.00396241	0.237956
log-likelihoods	prom	chr7	gencode::C7orf55-LUC7L2::ENSG00000146963.13	C7orf55-LUC7L2	2362	13	5.68509	2.28668	0.00402507	0.240964
log-likelihoods	prom	chr3	gencode::HEMK1::ENSG00000114735.5	HEMK1	916	6	2.0028	2.99581	0.00410463	0.244961
log-likelihoods	prom	chr6	gencode::HIST1H2BO::ENSG00000196331.5	HIST1H2BO	272	5	1.19435	4.18637	0.00411885	0.245046
log-likelihoods	prom	chr11	gencode::OR8H1::ENSG00000181693.6	OR8H1	500	8	2.46015	3.25184	0.00413617	0.245315
log-likelihoods	prom	chr17	gencode::ALOXE3::ENSG00000179148.5	ALOXE3	680	7	1.95588	3.57896	0.00419397	0.247208
log-likelihoods	prom	chr7	gencode::AP4M1::ENSG00000221838.5	AP4M1	439	5	0.622979	8.02595	0.00419787	0.247208
log-likelihoods	prom	chr19	gencode::NCAN::ENSG00000130287.9	NCAN	1109	11	3.74713	2.93558	0.0042068	0.247208
log-likelihoods	prom	chr7	gencode::OR6V1::ENSG00000225781.1	OR6V1	500	8	2.46852	3.2408	0.00424252	0.248544
log-likelihoods	prom	chr1	gencode::EPHX4::ENSG00000172031.6	EPHX4	669	8	2.47782	3.22864	0.00426771	0.249258
log-likelihoods	prom	chr2	gencode::PLB1::ENSG00000163803.8	PLB1	2685	15	6.15438	2.43729	0.00429561	0.249779
log-likelihoods	prom	chr7	gencode::IFRD1::ENSG00000006652.9	IFRD1	2285	15	6.63504	2.26073	0.00430272	0.249779
log-likelihoods	prom	chr12	gencode::HOXC11::ENSG00000123388.4	HOXC11	500	6	1.45116	4.13463	0.00440279	0.253708
log-likelihoods	prom	chr6	gencode::DEFB112::ENSG00000180872.4	DEFB112	883	11	4.14995	2.65064	0.00440715	0.253708
log-likelihoods	prom	chr17	gencode::GSDMB::ENSG00000073605.14	GSDMB	1704	11	4.42205	2.48753	0.00441985	0.253708
log-likelihoods	prom	chr11	gencode::OR56A1::ENSG00000180934.5	OR56A1	500	8	2.26704	3.52884	0.00442337	0.253708
log-likelihoods	prom	chr7	gencode::LAMB4::ENSG00000091128.8	LAMB4	948	9	2.67749	3.36135	0.00444388	0.254123
log-likelihoods	prom	chr19	gencode::HDGFRP2::ENSG00000167674.10	HDGFRP2	881	10	2.77005	3.61005	0.00446826	0.254758
log-likelihoods	prom	chr1	gencode::IARS2::ENSG00000067704.8	IARS2	627	8	2.73617	2.92379	0.00457891	0.260291
log-likelihoods	prom	chr16	gencode::UBE2I::ENSG00000103275.14	UBE2I	1970	12	5.48295	2.1886	0.00464095	0.262778
log-likelihoods	prom	chr1	gencode::KCNN3::ENSG00000143603.14	KCNN3	1976	16	6.26786	2.55271	0.00465009	0.262778
log-likelihoods	prom	chr15	gencode::CHAC1::ENSG00000128965.7	CHAC1	1329	9	3.23052	2.78593	0.0046874	0.263579
log-likelihoods	prom	chr2	gencode::DHRS9::ENSG00000073737.12	DHRS9	3677	27	11.8445	2.27954	0.00469178	0.263579
log-likelihoods	prom	chr16	gencode::KIF22::ENSG00000079616.8	KIF22	1302	10	3.46169	2.88876	0.0047062	0.263616
log-likelihoods	prom	chr16	gencode::CLEC18B::ENSG00000140839.7	CLEC18B	752	7	2.44003	2.86882	0.00480808	0.268538
log-likelihoods	prom	chr20	gencode::DPM1::ENSG00000000419.8	DPM1	598	7	1.76671	3.96217	0.00484577	0.269856
log-likelihoods	prom	chr1	gencode::LCE3D::ENSG00000163202.4	LCE3D	962	12	3.90253	3.07493	0.00487142	0.270498
log-likelihoods	prom	chr18	gencode::PIEZO2::ENSG00000154864.7	PIEZO2	2479	19	8.95897	2.12078	0.00489718	0.271143
log-likelihoods	prom	chr5	gencode::PCDHGB7::ENSG00000254122.1	PCDHGB7	500	3	0.679875	4.41258	0.00491289	0.271229
log-likelihoods	prom	chr13	gencode::ITGBL1::ENSG00000198542.9	ITGBL1	1682	12	5.21623	2.30051	0.00496944	0.272975
log-likelihoods	prom	chr2	gencode::POLR2D::ENSG00000144231.6	POLR2D	890	10	2.71794	3.67926	0.00497389	0.272975
log-likelihoods	prom	chr2	gencode::CH17-132F21.1::ENSG00000270999.1	CH17-132F21.1	649	8	3.23987	2.46924	0.00498728	0.272975
log-likelihoods	prom	chr16	gencode::LRRC29::ENSG00000125122.10	LRRC29	1332	10	3.07833	3.24852	0.00502892	0.273743
log-likelihoods	prom	chr2	gencode::AC011755.1::ENSG00000269686.1	AC011755.1	500	6	1.46489	4.09587	0.00502989	0.273743
log-likelihoods	prom	chr12	gencode::CLEC4C::ENSG00000198178.6	CLEC4C	2252	20	8.83248	2.26437	0.00507517	0.274901
log-likelihoods	prom	chr12	gencode::SPRYD4::ENSG00000176422.10	SPRYD4	838	8	2.17165	3.68384	0.00507987	0.274901
log-likelihoods	prom	chr21	gencode::KRTAP21-3::ENSG00000231068.1	KRTAP21-3	747	13	4.41403	2.94515	0.00514171	0.277303
log-likelihoods	prom	chr6	gencode::NQO2::ENSG00000124588.15	NQO2	1477	6	1.9514	3.07472	0.0051532	0.277303
log-likelihoods	prom	chr12	gencode::ANAPC5::ENSG00000089053.8	ANAPC5	3595	18	7.34299	2.45132	0.00517724	0.277816
log-likelihoods	prom	chr2	gencode::SOWAHC::ENSG00000198142.3	SOWAHC	127	4	0.652147	6.13358	0.005251	0.280619
log-likelihoods	prom	chr1	gencode::PRAMEF1::ENSG00000116721.9	PRAMEF1	1334	13	5.00961	2.59501	0.00525878	0.280619
log-likelihoods	prom	chr7	gencode::ABCF2::ENSG00000033050.3	ABCF2	994	9	3.40695	2.64166	0.00531408	0.282207
log-likelihoods	prom	chr1	gencode::OR2T3::ENSG00000196539.2	OR2T3	500	9	2.60938	3.44909	0.00532486	0.282207
log-likelihoods	prom	chr2	gencode::RAB3GAP1::ENSG00000115839.13	RAB3GAP1	911	10	2.95188	3.38767	0.00534021	0.282207
log-likelihoods	prom	chr11	gencode::DDI1::ENSG00000170967.3	DDI1	500	6	1.88742	3.17894	0.00534746	0.282207
log-likelihoods	prom	chr2	gencode::HAT1::ENSG00000128708.8	HAT1	955	7	2.69281	2.59952	0.00545122	0.286363
log-likelihoods	prom	chr3	gencode::SUCNR1::ENSG00000198829.5	SUCNR1	934	9	2.82852	3.18188	0.00545703	0.286363
log-likelihoods	prom	chr10	gencode::TUBGCP2::ENSG00000130640.9	TUBGCP2	1825	11	3.89381	2.825	0.00547865	0.286363
log-likelihoods	prom	chr2	gencode::GMCL1::ENSG00000087338.4	GMCL1	500	7	1.58256	4.42322	0.00549244	0.286363
log-likelihoods	prom	chr12	gencode::RNF10::ENSG00000022840.11	RNF10	841	7	2.1823	3.20762	0.00552257	0.286363
log-likelihoods	prom	chr6	gencode::ZNF292::ENSG00000188994.8	ZNF292	1605	15	7.59606	1.97471	0.00554396	0.286363
log-likelihoods	prom	chr4	gencode::RP11-487E13.1::ENSG00000249008.1	RP11-487E13.1	911	10	4.1236	2.42506	0.00554679	0.286363
log-likelihoods	prom	chr9	gencode::SWI5::ENSG00000175854.7	SWI5	1228	11	3.13488	3.5089	0.00555679	0.286363
log-likelihoods	prom	chr4	gencode::ADAD1::ENSG00000164113.6	ADAD1	1081	13	5.14769	2.5254	0.00556073	0.286363
log-likelihoods	prom	chr12	gencode::C12orf4::ENSG00000047621.7	C12orf4	760	10	3.27995	3.04883	0.00561605	0.288436
log-likelihoods	prom	chr17	gencode::TMEM102::ENSG00000181284.2	TMEM102	500	7	1.79312	3.9038	0.00563433	0.288601
log-likelihoods	prom	chr18	gencode::CCDC68::ENSG00000166510.9	CCDC68	1711	15	5.55336	2.70107	0.00568467	0.290403
log-likelihoods	prom	chr19	gencode::AC020952.1::ENSG00000268953.1	AC020952.1	604	10	3.38911	2.95062	0.00576307	0.293623
log-likelihoods	prom	chr21	gencode::KRTAP20-1::ENSG00000244624.2	KRTAP20-1	746	9	2.99906	3.00094	0.00577835	0.293623
log-likelihoods	prom	chr4	gencode::GABRG1::ENSG00000163285.7	GABRG1	726	11	4.70509	2.33789	0.0058194	0.294927
log-likelihoods	prom	chr11	gencode::INS-IGF2::ENSG00000129965.9	INS-IGF2	441	5	1.91437	2.61183	0.00588612	0.297521
log-likelihoods	prom	chr2	gencode::GPR113::ENSG00000173567.10	GPR113	1320	11	2.84537	3.86594	0.00600705	0.30189
log-likelihoods	prom	chr19	gencode::LIPE::ENSG00000079435.5	LIPE	500	6	1.35045	4.44298	0.00602593	0.30189
log-likelihoods	prom	chr9	gencode::SARDH::ENSG00000123453.12	SARDH	2799	19	9.08577	2.09118	0.00605691	0.30189
log-likelihoods	prom	chr1	gencode::GPR88::ENSG00000181656.6	GPR88	632	8	3.36433	2.37789	0.00605775	0.30189
log-likelihoods	prom	chr19	gencode::HSD17B14::ENSG00000087076.4	HSD17B14	729	7	2.09055	3.3484	0.00608876	0.30189
log-likelihoods	prom	chr1	gencode::ZNF695::ENSG00000197472.10	ZNF695	847	9	3.43272	2.62183	0.00608941	0.30189
log-likelihoods	prom	chr1	gencode::PTPRC::ENSG00000081237.14	PTPRC	837	8	2.32584	3.43962	0.00610995	0.30189
log-likelihoods	prom	chr12	gencode::HIGD1C::ENSG00000214511.3	HIGD1C	827	6	2.11907	2.83143	0.00612174	0.30189
log-likelihoods	prom	chr14	gencode::PARP2::ENSG00000129484.9	PARP2	947	8	2.75856	2.90007	0.00613571	0.30189
log-likelihoods	prom	chr2	gencode::UGT1A4::ENSG00000244474.1	UGT1A4	500	5	1.1232	4.45156	0.00613631	0.30189
log-likelihoods	prom	chr5	gencode::EGR1::ENSG00000120738.7	EGR1	500	8	1.92646	4.15269	0.00615699	0.30189
log-likelihoods	prom	chr20	gencode::SEMG2::ENSG00000124157.6	SEMG2	739	9	2.23716	4.02296	0.00616167	0.30189
log-likelihoods	prom	chr22	gencode::ARVCF::ENSG00000099889.9	ARVCF	2342	12	4.58965	2.61458	0.00622601	0.303593
log-likelihoods	prom	chr22	gencode::PES1::ENSG00000100029.13	PES1	1182	8	2.97162	2.69213	0.00622811	0.303593
log-likelihoods	prom	chr16	gencode::CES1::ENSG00000198848.8	CES1	843	8	3.05655	2.61733	0.00626265	0.304501
log-likelihoods	prom	chr4	gencode::UGT2B4::ENSG00000156096.8	UGT2B4	1170	16	6.5323	2.44937	0.00629399	0.30525
log-likelihoods	prom	chr17	gencode::SMG6::ENSG00000070366.9	SMG6	1784	11	4.29558	2.56077	0.00634405	0.306901
log-likelihoods	prom	chr5	gencode::PCDHGA7::ENSG00000253537.1	PCDHGA7	500	4	0.656681	6.09124	0.00638046	0.307648
log-likelihoods	prom	chr19	gencode::TMEM259::ENSG00000182087.8	TMEM259	654	7	2.35595	2.9712	0.00639159	0.307648
log-likelihoods	prom	chr1	gencode::PTAFR::ENSG00000169403.7	PTAFR	1346	11	3.31274	3.32051	0.00642719	0.307981
log-likelihoods	prom	chr5	gencode::PCDHGA4::ENSG00000262576.1	PCDHGA4	500	3	0.635221	4.72276	0.00643578	0.307981
log-likelihoods	prom	chr9	gencode::HSPA5::ENSG00000044574.7	HSPA5	593	6	1.90437	3.15065	0.00644675	0.307981
log-likelihoods	prom	chr9	gencode::RLN2::ENSG00000107014.7	RLN2	682	7	2.87376	2.43583	0.00647945	0.308773
log-likelihoods	prom	chr15	gencode::CASC5::ENSG00000137812.15	CASC5	854	8	2.46854	3.24078	0.0065202	0.30916
log-likelihoods	prom	chr11	gencode::CRTAM::ENSG00000109943.4	CRTAM	1661	13	4.48707	2.89722	0.00653349	0.30916
log-likelihoods	prom	chr12	gencode::GTSF1::ENSG00000170627.5	GTSF1	1416	11	3.96581	2.77371	0.00653599	0.30916
log-likelihoods	prom	chr19	gencode::ZNF112::ENSG00000062370.12	ZNF112	1810	16	8.61514	1.8572	0.00656677	0.309851
log-likelihoods	prom	chr4	gencode::SLAIN2::ENSG00000109171.10	SLAIN2	1331	11	3.559	3.09075	0.0065858	0.309986
log-likelihoods	prom	chr7	gencode::YKT6::ENSG00000106636.3	YKT6	807	7	2.50993	2.78893	0.00665206	0.312337
log-likelihoods	prom	chr12	gencode::RSRC2::ENSG00000111011.13	RSRC2	740	7	1.96117	3.56929	0.00669447	0.31356
log-likelihoods	prom	chr10	gencode::ATP5C1::ENSG00000165629.15	ATP5C1	701	9	2.62546	3.42797	0.0067306	0.314483
log-likelihoods	prom	chr12	gencode::NR1H4::ENSG00000012504.9	NR1H4	1754	17	7.61218	2.23326	0.00677842	0.315312
log-likelihoods	prom	chr1	gencode::CELA2B::ENSG00000215704.5	CELA2B	840	8	2.383	3.35711	0.00678126	0.315312
log-likelihoods	prom	chr20	gencode::CBFA2T2::ENSG00000078699.17	CBFA2T2	2884	15	6.65246	2.25481	0.00685273	0.317864
log-likelihoods	prom	chr15	gencode::GABRB3::ENSG00000166206.9	GABRB3	3586	38	24.2345	1.56801	0.00703408	0.325022
log-likelihoods	prom	chr2	gencode::REG1B::ENSG00000172023.3	REG1B	849	13	4.88266	2.66248	0.00704099	0.325022
log-likelihoods	prom	chr16	gencode::FBXL19::ENSG00000099364.12	FBXL19	2549	21	6.91668	3.03614	0.00711425	0.327615
log-likelihoods	prom	chr2	gencode::SNRPG::ENSG00000143977.9	SNRPG	1063	5	1.39511	3.58396	0.00718672	0.330158
log-likelihoods	prom	chr6	gencode::RP1-139D8.6::ENSG00000214732.1	RP1-139D8.6	810	8	2.14245	3.73405	0.00722283	0.331023
log-likelihoods	prom	chr11	gencode::SLC22A12::ENSG00000197891.7	SLC22A12	500	6	1.69667	3.53634	0.00729054	0.333329
log-likelihoods	prom	chr3	gencode::AMOTL2::ENSG00000114019.10	AMOTL2	1485	11	4.6831	2.34887	0.00731575	0.333686
log-likelihoods	prom	chr1	gencode::NKAIN1::ENSG00000084628.5	NKAIN1	1795	13	5.79767	2.24228	0.00736062	0.334141
log-likelihoods	prom	chr17	gencode::PSMB3::ENSG00000108294.4	PSMB3	816	9	2.3356	3.8534	0.00736062	0.334141
log-likelihoods	prom	chr12	gencode::CTD-2021H9.3::ENSG00000258053.1	CTD-2021H9.3	820	8	3.25448	2.45815	0.00740134	0.335135
log-likelihoods	prom	chr5	gencode::CDH10::ENSG00000040731.6	CDH10	613	10	2.9418	3.39928	0.00741751	0.335135
log-likelihoods	prom	chr10	gencode::ACBD7::ENSG00000176244.6	ACBD7	938	9	4.41655	2.03779	0.00743821	0.33528
log-likelihoods	prom	chr19	gencode::VSTM1::ENSG00000189068.5	VSTM1	953	11	3.48436	3.15697	0.007463	0.335607
log-likelihoods	prom	chr14	gencode::ACOT1::ENSG00000184227.3	ACOT1	513	4	0.88909	4.49898	0.00758797	0.340428
log-likelihoods	prom	chr14	gencode::MIA2::ENSG00000150526.7	MIA2	869	8	2.07345	3.85831	0.00760698	0.340483
log-likelihoods	prom	chr2	gencode::MAP3K19::ENSG00000176601.7	MAP3K19	1751	19	6.06544	3.1325	0.00765911	0.342018
log-likelihoods	prom	chr17	gencode::SPEM1::ENSG00000181323.7	SPEM1	763	8	2.38785	3.35029	0.00770889	0.342843
log-likelihoods	prom	chr14	gencode::FAM179B::ENSG00000198718.8	FAM179B	378	6	1.4138	4.24389	0.00771338	0.342843
log-likelihoods	prom	chr2	gencode::AC007377.1::ENSG00000268898.1	AC007377.1	966	9	3.2804	2.74357	0.00779016	0.345454
log-likelihoods	prom	chr1	gencode::PRG4::ENSG00000116690.7	PRG4	983	8	2.42917	3.2933	0.00784929	0.347272
log-likelihoods	prom	chr7	gencode::MTPN::ENSG00000105887.10	MTPN	710	7	2.60918	2.68284	0.00790074	0.348743
log-likelihoods	prom	chr11	gencode::OR51B2::ENSG00000184881.2	OR51B2	500	8	2.53881	3.15108	0.00793695	0.349536
log-likelihoods	prom	chr6	gencode::SFTA2::ENSG00000196260.3	SFTA2	765	7	2.05881	3.40002	0.0079681	0.350103
log-likelihoods	prom	chr1	gencode::PPIAL4G::ENSG00000236334.1	PPIAL4G	500	3	0.87718	3.42005	0.0080447	0.35266
log-likelihoods	prom	chr12	gencode::SLCO1A2::ENSG00000084453.12	SLCO1A2	1556	17	7.71359	2.2039	0.00808699	0.353704
log-likelihoods	prom	chr3	gencode::GPR87::ENSG00000138271.4	GPR87	631	5	1.16046	4.30864	0.00810978	0.353893
log-likelihoods	prom	chr12	gencode::OR8S1::ENSG00000197376.2	OR8S1	500	6	1.85011	3.24305	0.00830166	0.360188
log-likelihoods	prom	chr17	gencode::TAC4::ENSG00000176358.11	TAC4	875	7	2.48906	2.81231	0.00832598	0.360188
log-likelihoods	prom	chr18	gencode::ATP5A1::ENSG00000152234.11	ATP5A1	1337	9	3.50361	2.56878	0.00836986	0.360188
log-likelihoods	prom	chr5	gencode::BASP1::ENSG00000176788.7	BASP1	747	7	3.0564	2.29027	0.00837933	0.360188
log-likelihoods	prom	chr3	gencode::HESX1::ENSG00000163666.4	HESX1	821	7	2.013	3.47739	0.00837964	0.360188
log-likelihoods	prom	chr17	gencode::KRTAP4-12::ENSG00000213416.3	KRTAP4-12	500	6	1.78773	3.35621	0.0083902	0.360188
log-likelihoods	prom	chr19	gencode::CCDC94::ENSG00000105248.11	CCDC94	906	9	2.66246	3.38033	0.00839343	0.360188
log-likelihoods	prom	chr19	gencode::URI1::ENSG00000105176.13	URI1	1738	16	6.31456	2.53383	0.00841346	0.360188
log-likelihoods	prom	chr1	gencode::SDF4::ENSG00000078808.12	SDF4	616	7	2.16468	3.23374	0.00844183	0.360188
log-likelihoods	prom	chr20	gencode::CST9L::ENSG00000101435.4	CST9L	500	8	2.53609	3.15447	0.00844205	0.360188
log-likelihoods	prom	chr10	gencode::PDCD11::ENSG00000148843.9	PDCD11	855	8	1.90493	4.19963	0.00849388	0.361594
log-likelihoods	prom	chr16	gencode::NPIPB15::ENSG00000196436.7	NPIPB15	836	7	3.01442	2.32217	0.00853977	0.362451
log-likelihoods	prom	chr11	gencode::TAF10::ENSG00000166337.5	TAF10	101	2	0.365008	5.47932	0.00856169	0.362451
log-likelihoods	prom	chr8	gencode::USP17L2::ENSG00000223443.2	USP17L2	500	5	1.65774	3.01616	0.00857077	0.362451
log-likelihoods	prom	chr18	gencode::RPL17::ENSG00000265681.2	RPL17	1096	9	3.00043	2.99957	0.0086084	0.36324
log-likelihoods	prom	chr14	gencode::WARS::ENSG00000140105.13	WARS	939	7	1.89597	3.69204	0.00866552	0.364407
log-likelihoods	prom	chr16	gencode::MT1A::ENSG00000205362.6	MT1A	897	8	3.10291	2.57822	0.00868047	0.364407
log-likelihoods	prom	chr1	gencode::STX6::ENSG00000135823.9	STX6	767	7	2.59714	2.69527	0.00869311	0.364407
log-likelihoods	prom	chr8	gencode::RP11-297N6.4::ENSG00000255046.1	RP11-297N6.4	470	6	1.70021	3.52897	0.00872319	0.364869
log-likelihoods	prom	chr5	gencode::PCDHGB1::ENSG00000254221.1	PCDHGB1	500	3	0.648794	4.62397	0.00875981	0.365603
log-likelihoods	prom	chr16	gencode::CDIPT::ENSG00000103502.9	CDIPT	1283	10	3.5591	2.8097	0.00883847	0.367723
log-likelihoods	prom	chr19	gencode::KRTDAP::ENSG00000188508.6	KRTDAP	822	8	2.78107	2.87659	0.008849	0.367723
log-likelihoods	prom	chr7	gencode::AC002451.1::ENSG00000269449.1	AC002451.1	500	6	1.56913	3.82377	0.00897779	0.370296
log-likelihoods	prom	chr20	gencode::EPB41L1::ENSG00000088367.16	EPB41L1	5294	25	12.3893	2.01787	0.00898642	0.370296
log-likelihoods	prom	chr19	gencode::SPHK2::ENSG00000063176.11	SPHK2	1190	6	1.88919	3.17596	0.00899518	0.370296
log-likelihoods	prom	chr11	gencode::MRPL11::ENSG00000174547.9	MRPL11	795	7	2.14578	3.26221	0.00900307	0.370296
log-likelihoods	prom	chr2	gencode::CTNNA2::ENSG00000066032.14	CTNNA2	4943	46	25.3604	1.81385	0.00900756	0.370296
log-likelihoods	prom	chr18	gencode::BOD1L2::ENSG00000228075.4	BOD1L2	500	9	2.57042	3.50138	0.00903622	0.37061
log-likelihoods	prom	chr7	gencode::GPC2::ENSG00000213420.3	GPC2	359	5	1.14717	4.35854	0.0090539	0.37061
log-likelihoods	prom	chr1	gencode::LCE2B::ENSG00000159455.7	LCE2B	1928	20	9.27738	2.15578	0.00911461	0.3723
log-likelihoods	prom	chr9	gencode::COL15A1::ENSG00000204291.6	COL15A1	564	5	1.5614	3.20226	0.00919252	0.37374
log-likelihoods	prom	chr14	gencode::OR4E2::ENSG00000221977.1	OR4E2	500	6	1.66701	3.59926	0.00919841	0.37374
log-likelihoods	prom	chr16	gencode::GSG1L::ENSG00000169181.8	GSG1L	2315	20	11.1801	1.78889	0.00920839	0.37374
log-likelihoods	prom	chr2	gencode::ANKMY1::ENSG00000144504.11	ANKMY1	1133	11	4.25436	2.58558	0.00927332	0.375136
log-likelihoods	prom	chr1	gencode::CRCT1::ENSG00000169509.5	CRCT1	947	11	4.04043	2.72248	0.00930957	0.375136
log-likelihoods	prom	chr11	gencode::OR5D16::ENSG00000205029.1	OR5D16	500	9	2.75374	3.26828	0.00932728	0.375136
log-likelihoods	prom	chr19	gencode::ZNF599::ENSG00000153896.13	ZNF599	621	9	2.87427	3.13123	0.00933859	0.375136
log-likelihoods	prom	chr20	gencode::FAM83D::ENSG00000101447.9	FAM83D	500	7	2.4577	2.8482	0.00935107	0.375136
log-likelihoods	prom	chr7	gencode::DDC::ENSG00000132437.13	DDC	2551	20	9.45768	2.11468	0.00936029	0.375136
log-likelihoods	prom	chr8	gencode::AC016885.1::ENSG00000268080.1	AC016885.1	547	8	2.57671	3.10473	0.00939603	0.375782
log-likelihoods	prom	chr11	gencode::GPHA2::ENSG00000149735.2	GPHA2	986	10	2.62084	3.81558	0.00942633	0.376209
log-likelihoods	prom	chr3	gencode::ADCY5::ENSG00000173175.10	ADCY5	1908	16	6.99367	2.28778	0.00951016	0.378192
log-likelihoods	prom	chr19	gencode::LILRB1::ENSG00000104972.10	LILRB1	2350	20	10.1012	1.97996	0.00951552	0.378192
log-likelihoods	prom	chr22	gencode::GCAT::ENSG00000100116.12	GCAT	715	7	2.08745	3.35337	0.00958796	0.37984
log-likelihoods	prom	chr5	gencode::PCDHA12::ENSG00000251664.2	PCDHA12	500	6	1.04054	5.76623	0.00959663	0.37984
log-likelihoods	prom	chr6	gencode::HIST1H1D::ENSG00000124575.5	HIST1H1D	500	6	2.41525	2.48421	0.00969469	0.38293
log-likelihoods	prom	chr19	gencode::TNNT1::ENSG00000105048.12	TNNT1	1610	10	4.68433	2.13478	0.00973888	0.383884
log-likelihoods	prom	chr1	gencode::GLIS1::ENSG00000174332.3	GLIS1	697	8	2.29014	3.49323	0.00983671	0.386944
log-likelihoods	prom	chr19	gencode::PRX::ENSG00000105227.10	PRX	971	8	2.72422	2.93662	0.00989026	0.388254
log-likelihoods	prom	chr16	gencode::RANBP10::ENSG00000141084.6	RANBP10	354	4	0.875907	4.5667	0.00993142	0.389072
log-likelihoods	prom	chr22	gencode::RFPL1::ENSG00000128250.5	RFPL1	500	5	1.33223	3.75311	0.010025	0.391936
log-likelihoods	prom	chr19	gencode::TMEM150B::ENSG00000180061.5	TMEM150B	968	8	2.78627	2.87123	0.0100704	0.392911
log-likelihoods	prom	chr19	gencode::REEP6::ENSG00000115255.6	REEP6	779	10	2.95763	3.38109	0.0101655	0.395814
log-likelihoods	prom	chr6	gencode::SLC22A7::ENSG00000137204.10	SLC22A7	605	6	1.86708	3.21357	0.010222	0.397206
log-likelihoods	prom	chr11	gencode::OR52I2::ENSG00000226288.1	OR52I2	500	9	2.5826	3.48486	0.0102577	0.3976
log-likelihoods	prom	chr1	gencode::SMAP2::ENSG00000084070.7	SMAP2	942	7	1.947	3.59527	0.0102736	0.3976
log-likelihoods	prom	chr2	gencode::PGAP1::ENSG00000197121.10	PGAP1	1529	12	5.74707	2.08802	0.0103113	0.397803
log-likelihoods	prom	chr11	gencode::PRG3::ENSG00000156575.2	PRG3	828	8	2.3194	3.44917	0.0103409	0.397803
log-likelihoods	prom	chr1	gencode::GSTM5::ENSG00000134201.6	GSTM5	765	8	2.54836	3.13928	0.0103412	0.397803
log-likelihoods	prom	chr19	gencode::SIGLEC10::ENSG00000142512.10	SIGLEC10	575	7	2.09228	3.34564	0.010403	0.398982
log-likelihoods	prom	chr1	gencode::ZP4::ENSG00000116996.5	ZP4	664	7	2.92721	2.39136	0.0104135	0.398982
log-likelihoods	prom	chr2	gencode::NLRC4::ENSG00000091106.14	NLRC4	1559	12	4.00218	2.99836	0.0104403	0.399212
log-likelihoods	prom	chr17	gencode::SP2::ENSG00000167182.11	SP2	854	10	2.48943	4.01698	0.0104664	0.39941
log-likelihoods	prom	chr1	gencode::AKR1A1::ENSG00000117448.9	AKR1A1	910	7	2.32405	3.01199	0.0105609	0.401543
log-likelihoods	prom	chr1	gencode::ELTD1::ENSG00000162618.8	ELTD1	912	13	5.06792	2.56515	0.0105642	0.401543
log-likelihoods	prom	chr6	gencode::AL033381.1::ENSG00000176515.1	AL033381.1	932	4	1.02307	3.90979	0.0106791	0.405109
log-likelihoods	prom	chr11	gencode::OAF::ENSG00000184232.4	OAF	788	6	2.37767	2.52348	0.010723	0.40528
log-likelihoods	prom	chr11	gencode::PTPRCAP::ENSG00000213402.2	PTPRCAP	111	2	0.237872	8.40788	0.010726	0.40528
log-likelihoods	prom	chr17	gencode::KRTAP4-16P::ENSG00000241241.1	KRTAP4-16P	500	5	1.60283	3.11948	0.0107713	0.406193
log-likelihoods	prom	chr7	gencode::GPER1::ENSG00000164850.10	GPER1	2323	10	4.2758	2.33875	0.0108286	0.407552
log-likelihoods	prom	chr8	gencode::YWHAZ::ENSG00000164924.13	YWHAZ	4441	21	10.3582	2.02738	0.0108523	0.407599
log-likelihoods	prom	chr1	gencode::RUSC1::ENSG00000160753.11	RUSC1	1304	7	2.20875	3.16921	0.0108849	0.407599
log-likelihoods	prom	chr7	gencode::CCDC126::ENSG00000169193.7	CCDC126	1400	10	4.13686	2.41729	0.0108973	0.407599
log-likelihoods	prom	chr19	gencode::NLRP9::ENSG00000185792.5	NLRP9	690	8	2.00248	3.99505	0.0109217	0.407599
log-likelihoods	prom	chr1	gencode::SPRR1B::ENSG00000169469.7	SPRR1B	1431	13	5.69093	2.28434	0.0109363	0.407599
log-likelihoods	prom	chr5	gencode::PCDHGB3::ENSG00000262209.1	PCDHGB3	500	3	0.647762	4.63133	0.0110017	0.409243
log-likelihoods	prom	chr2	gencode::TRIM43::ENSG00000144015.4	TRIM43	866	5	1.45584	3.43444	0.0111227	0.411922
log-likelihoods	prom	chr17	gencode::QRICH2::ENSG00000129646.9	QRICH2	782	9	2.97914	3.02101	0.0111366	0.411922
log-likelihoods	prom	chr16	gencode::TMEM204::ENSG00000131634.9	TMEM204	967	6	1.41886	4.22874	0.0111385	0.411922
log-likelihoods	prom	chr17	gencode::OR1A2::ENSG00000172150.4	OR1A2	500	7	1.7877	3.91565	0.011168	0.411922
log-likelihoods	prom	chr14	gencode::APEX1::ENSG00000100823.7	APEX1	305	4	0.910491	4.39324	0.0111813	0.411922
log-likelihoods	prom	chr21	gencode::KCNJ15::ENSG00000157551.13	KCNJ15	1865	16	5.19729	3.07853	0.0112478	0.413439
log-likelihoods	prom	chr8	gencode::ZC3H3::ENSG00000014164.6	ZC3H3	920	9	3.47662	2.58872	0.0112656	0.413439
log-likelihoods	prom	chr7	gencode::OCM::ENSG00000122543.6	OCM	1677	13	5.48995	2.36796	0.0113312	0.415052
log-likelihoods	prom	chr16	gencode::GLIS2::ENSG00000126603.4	GLIS2	1205	8	3.11031	2.57209	0.0113691	0.4154
log-likelihoods	prom	chr11	gencode::INS::ENSG00000254647.2	INS	811	7	3.33528	2.09877	0.0114047	0.4154
log-likelihoods	prom	chr11	gencode::ROBO4::ENSG00000154133.10	ROBO4	855	8	3.21757	2.48635	0.0114058	0.4154
log-likelihoods	prom	chr1	gencode::SLC35F3::ENSG00000183780.8	SLC35F3	1494	14	7.11266	1.96832	0.0114888	0.417629
log-likelihoods	prom	chr14	gencode::RP11-204N11.1::ENSG00000258869.1	RP11-204N11.1	1604	21	8.59939	2.44203	0.0115314	0.418025
log-likelihoods	prom	chr7	gencode::UBE2H::ENSG00000186591.7	UBE2H	869	8	2.63049	3.04126	0.0115433	0.418025
log-likelihoods	prom	chr19	gencode::CGB1::ENSG00000267631.3	CGB1	1082	9	3.40699	2.64163	0.0115784	0.4183
log-likelihoods	prom	chr7	gencode::TFEC::ENSG00000105967.11	TFEC	2712	18	8.01102	2.2469	0.0116274	0.4183
log-likelihoods	prom	chr12	gencode::SLC11A2::ENSG00000110911.10	SLC11A2	2656	15	6.79668	2.20696	0.011635	0.4183
log-likelihoods	prom	chr7	gencode::TAF6::ENSG00000106290.10	TAF6	1222	5	1.48877	3.35848	0.0116452	0.4183
log-likelihoods	prom	chr12	gencode::IL31::ENSG00000204671.1	IL31	802	9	3.21042	2.80337	0.0116601	0.4183
log-likelihoods	prom	chr11	gencode::LDHC::ENSG00000166796.7	LDHC	1114	9	3.19847	2.81384	0.0118809	0.425424
log-likelihoods	prom	chr12	gencode::SLCO1C1::ENSG00000139155.4	SLCO1C1	787	10	2.90995	3.43648	0.0119133	0.425791
log-likelihoods	prom	chr19	gencode::VMAC::ENSG00000187650.3	VMAC	774	8	2.6585	3.00922	0.0119955	0.427928
log-likelihoods	prom	chr8	gencode::FGF17::ENSG00000158815.6	FGF17	500	5	1.43797	3.47712	0.0120615	0.429483
log-likelihoods	prom	chr7	gencode::CLDN4::ENSG00000189143.8	CLDN4	1248	9	3.757	2.39553	0.0121531	0.431941
log-likelihoods	prom	chr19	gencode::INSL3::ENSG00000248099.3	INSL3	791	7	2.30023	3.04317	0.0121865	0.432326
log-likelihoods	prom	chr22	gencode::TBC1D10A::ENSG00000099992.11	TBC1D10A	1619	9	4.20123	2.14223	0.0122583	0.434071
log-likelihoods	prom	chr1	gencode::OR2G3::ENSG00000177476.2	OR2G3	500	7	2.52438	2.77296	0.0123004	0.434757
log-likelihoods	prom	chr9	gencode::LCN12::ENSG00000184925.7	LCN12	884	8	2.46125	3.25038	0.0123456	0.434772
log-likelihoods	prom	chr19	gencode::MUC16::ENSG00000181143.11	MUC16	1299	11	4.63649	2.37249	0.0123462	0.434772
log-likelihoods	prom	chr4	gencode::NAP1L5::ENSG00000177432.6	NAP1L5	500	4	0.903988	4.42484	0.0124061	0.436081
log-likelihoods	prom	chr11	gencode::DIXDC1::ENSG00000150764.9	DIXDC1	1901	13	5.55416	2.34059	0.0126375	0.443399
log-likelihoods	prom	chr11	gencode::PIWIL4::ENSG00000134627.7	PIWIL4	1379	12	4.5026	2.66512	0.0127251	0.445659
log-likelihoods	prom	chr12	gencode::ING4::ENSG00000111653.15	ING4	961	9	2.61378	3.44329	0.0127699	0.446409
log-likelihoods	prom	chr1	gencode::OR10Z1::ENSG00000198967.3	OR10Z1	500	8	2.3328	3.42936	0.0128273	0.447599
log-likelihoods	prom	chr1	gencode::TNNT2::ENSG00000118194.14	TNNT2	1736	12	4.75363	2.52439	0.0128768	0.448512
log-likelihoods	prom	chr12	gencode::NACA::ENSG00000196531.6	NACA	703	9	1.73092	5.19955	0.0130705	0.454378
log-likelihoods	prom	chr14	gencode::KIAA0586::ENSG00000100578.10	KIAA0586	681	5	1.71142	2.92156	0.0131044	0.454378
log-likelihoods	prom	chr6	gencode::GSTA5::ENSG00000182793.6	GSTA5	1837	16	6.15745	2.59848	0.0131294	0.454378
log-likelihoods	prom	chr18	gencode::SERPINB10::ENSG00000242550.1	SERPINB10	948	8	3.0787	2.5985	0.0131401	0.454378
log-likelihoods	prom	chr22	gencode::ZMAT5::ENSG00000100319.11	ZMAT5	796	7	2.13537	3.27813	0.0132065	0.455796
log-likelihoods	prom	chr11	gencode::PEX16::ENSG00000121680.11	PEX16	892	8	2.57432	3.10762	0.0132287	0.455796
log-likelihoods	prom	chr17	gencode::TMEM92::ENSG00000167105.3	TMEM92	1768	12	4.64534	2.58324	0.0132597	0.455822
log-likelihoods	prom	chr19	gencode::NLRP13::ENSG00000173572.7	NLRP13	679	9	3.00281	2.99719	0.0133004	0.455822
log-likelihoods	prom	chr19	gencode::CEACAM16::ENSG00000213892.6	CEACAM16	1742	12	5.11692	2.34516	0.0133009	0.455822
log-likelihoods	prom	chr12	gencode::CMKLR1::ENSG00000174600.9	CMKLR1	1591	13	6.00057	2.16646	0.0134181	0.459018
log-likelihoods	prom	chr19	gencode::GLTSCR2::ENSG00000105373.14	GLTSCR2	736	8	2.23166	3.58478	0.013498	0.46093
log-likelihoods	prom	chr1	gencode::GPSM2::ENSG00000121957.8	GPSM2	1469	9	3.96876	2.26771	0.0135928	0.46334
log-likelihoods	prom	chr19	gencode::SYMPK::ENSG00000125755.14	SYMPK	765	7	2.30102	3.04213	0.0136824	0.465565
log-likelihoods	prom	chr19	gencode::APOC2::ENSG00000234906.4	APOC2	2030	11	4.73646	2.32241	0.0137753	0.467897
log-likelihoods	prom	chr3	gencode::TM4SF1::ENSG00000169908.6	TM4SF1	1172	7	2.61842	2.67337	0.0138862	0.470828
log-likelihoods	prom	chr12	gencode::OR6C74::ENSG00000197706.3	OR6C74	500	7	2.33146	3.00241	0.0139856	0.473359
log-likelihoods	prom	chr17	gencode::DHRS7C::ENSG00000184544.7	DHRS7C	831	7	2.49482	2.80582	0.014075	0.475545
log-likelihoods	prom	chr14	gencode::AC004817.1::ENSG00000267901.1	AC004817.1	568	7	1.99595	3.5071	0.0141895	0.47857
log-likelihoods	prom	chr1	gencode::OR10T2::ENSG00000186306.1	OR10T2	500	8	2.46796	3.24154	0.0142218	0.478816
log-likelihoods	prom	chr19	gencode::F2RL3::ENSG00000127533.3	F2RL3	770	8	2.59391	3.08415	0.0142505	0.47894
log-likelihoods	prom	chr10	gencode::USMG5::ENSG00000173915.8	USMG5	967	8	2.1275	3.76027	0.0143045	0.479914
log-likelihoods	prom	chr2	gencode::TFPI::ENSG00000003436.10	TFPI	1731	12	4.9076	2.44519	0.0144759	0.484817
log-likelihoods	prom	chr19	gencode::ZSCAN4::ENSG00000180532.6	ZSCAN4	729	8	3.64605	2.19415	0.0145092	0.484873
log-likelihoods	prom	chr16	gencode::SDR42E2::ENSG00000183921.5	SDR42E2	959	7	2.55732	2.73724	0.0145361	0.484873
log-likelihoods	prom	chr13	gencode::EPSTI1::ENSG00000133106.10	EPSTI1	810	7	2.28411	3.06466	0.0145611	0.484873
log-likelihoods	prom	chr2	gencode::AC112721.1::ENSG00000222022.1	AC112721.1	940	9	3.04263	2.95797	0.0145788	0.484873
log-likelihoods	prom	chr16	gencode::C16orf13::ENSG00000130731.11	C16orf13	801	7	2.60373	2.68845	0.0146312	0.485772
log-likelihoods	prom	chr14	gencode::RNASE9::ENSG00000188655.6	RNASE9	940	9	2.84652	3.16175	0.0147433	0.488645
log-likelihoods	prom	chr20	gencode::GINS1::ENSG00000101003.8	GINS1	831	7	2.717	2.57637	0.0147993	0.489655
log-likelihoods	prom	chr6	gencode::MLIP::ENSG00000146147.10	MLIP	2695	21	8.3007	2.52991	0.0149492	0.493761
log-likelihoods	prom	chr17	gencode::ANAPC11::ENSG00000141552.13	ANAPC11	2550	19	8.71483	2.18019	0.015029	0.494322
log-likelihoods	prom	chr21	gencode::KRTAP6-2::ENSG00000186930.3	KRTAP6-2	689	7	2.66208	2.62952	0.0150354	0.494322
log-likelihoods	prom	chr20	gencode::AL031666.2::ENSG00000267882.1	AL031666.2	500	4	1.00134	3.99463	0.0150436	0.494322
log-likelihoods	prom	chr16	gencode::CDH13::ENSG00000140945.11	CDH13	953	13	5.85243	2.2213	0.0151026	0.49541
log-likelihoods	prom	chr17	gencode::EVI2A::ENSG00000126860.7	EVI2A	1382	7	2.11605	3.30805	0.0152667	0.499938
log-likelihoods	prom	chr17	gencode::KRT32::ENSG00000108759.3	KRT32	500	6	1.43299	4.18704	0.0153106	0.50052
log-likelihoods	prom	chr11	gencode::LRTOMT::ENSG00000184154.8	LRTOMT	2637	10	3.25305	3.07404	0.0154317	0.501987
log-likelihoods	prom	chr7	gencode::ZNF3::ENSG00000166526.12	ZNF3	1292	8	3.5345	2.2634	0.0154336	0.501987
log-likelihoods	prom	chr2	gencode::NEU4::ENSG00000204099.7	NEU4	1446	11	5.48804	2.00436	0.0154341	0.501987
log-likelihoods	prom	chr8	gencode::TEX15::ENSG00000133863.2	TEX15	500	6	1.34338	4.46633	0.0154705	0.502318
log-likelihoods	prom	chr11	gencode::DNHD1::ENSG00000179532.8	DNHD1	749	8	2.92135	2.73846	0.015506	0.502621
log-likelihoods	prom	chr6	gencode::NKAPL::ENSG00000189134.3	NKAPL	443	8	1.94684	4.10922	0.0155439	0.502997
log-likelihoods	prom	chr8	gencode::SDCBP::ENSG00000137575.7	SDCBP	1878	12	6.19205	1.93797	0.0156159	0.503264
log-likelihoods	prom	chr7	gencode::AC005493.1::ENSG00000214841.1	AC005493.1	967	12	5.01642	2.39215	0.01564	0.503264
log-likelihoods	prom	chr2	gencode::DCDC2C::ENSG00000214866.3	DCDC2C	815	8	2.86063	2.79658	0.01566	0.503264
log-likelihoods	prom	chr1	gencode::PPIAL4C::ENSG00000198161.5	PPIAL4C	500	5	1.92208	2.60135	0.0156613	0.503264
log-likelihoods	prom	chr1	gencode::RBBP5::ENSG00000117222.9	RBBP5	837	7	2.53221	2.76439	0.0156835	0.503264
log-likelihoods	prom	chr1	gencode::ECE1::ENSG00000117298.10	ECE1	2422	16	6.54966	2.44287	0.0157114	0.503317
log-likelihoods	prom	chr9	gencode::ECM2::ENSG00000106823.8	ECM2	958	5	1.2481	4.00609	0.0158401	0.506591
log-likelihoods	prom	chr2	gencode::TMEM247::ENSG00000187600.8	TMEM247	881	6	2.36701	2.53485	0.0158986	0.507261
log-likelihoods	prom	chr9	gencode::ALDOB::ENSG00000136872.13	ALDOB	883	8	3.87104	2.06663	0.0159254	0.507261
log-likelihoods	prom	chr17	gencode::SLC52A1::ENSG00000132517.10	SLC52A1	1000	8	3.43338	2.33007	0.0159404	0.507261
log-likelihoods	prom	chr16	gencode::TSNAXIP1::ENSG00000102904.10	TSNAXIP1	383	4	1.05823	3.77989	0.0160152	0.50861
log-likelihoods	prom	chr4	gencode::MEPE::ENSG00000152595.12	MEPE	1907	13	6.76337	1.92212	0.016036	0.50861
log-likelihoods	prom	chr5	gencode::SGTB::ENSG00000197860.5	SGTB	563	5	1.52574	3.27709	0.016132	0.510426
log-likelihoods	prom	chr12	gencode::MFAP5::ENSG00000197614.6	MFAP5	1456	10	4.00224	2.4986	0.0161652	0.510426
log-likelihoods	prom	chr13	gencode::SLITRK1::ENSG00000178235.6	SLITRK1	500	8	2.7317	2.92858	0.0161731	0.510426
log-likelihoods	prom	chr17	gencode::SYNGR2::ENSG00000108639.3	SYNGR2	1366	8	3.82654	2.09066	0.0162093	0.510727
log-likelihoods	prom	chr4	gencode::KCNIP4::ENSG00000185774.10	KCNIP4	3744	34	22.0412	1.54256	0.0162831	0.51221
log-likelihoods	prom	chr6	gencode::HLA-DQB1::ENSG00000179344.12	HLA-DQB1	1726	16	9.02889	1.77209	0.0163428	0.513243
log-likelihoods	prom	chr19	gencode::LILRA3::ENSG00000170866.7	LILRA3	1617	14	6.21167	2.25382	0.016429	0.515108
log-likelihoods	prom	chr13	gencode::TRPC4::ENSG00000133107.10	TRPC4	1460	12	5.77131	2.07925	0.016511	0.516111
log-likelihoods	prom	chr6	gencode::EYA4::ENSG00000112319.13	EYA4	2288	18	7.31141	2.4619	0.0165612	0.516111
log-likelihoods	prom	chr3	gencode::TM4SF4::ENSG00000169903.6	TM4SF4	500	4	1.2863	3.10968	0.0165702	0.516111
log-likelihoods	prom	chr6	gencode::GJB7::ENSG00000164411.6	GJB7	1362	10	4.70153	2.12697	0.0166428	0.516111
log-likelihoods	prom	chr6	gencode::BTNL2::ENSG00000204290.6	BTNL2	919	9	3.34489	2.69067	0.0166695	0.516111
log-likelihoods	prom	chr3	gencode::FILIP1L::ENSG00000168386.14	FILIP1L	1931	10	4.01175	2.49267	0.0166822	0.516111
log-likelihoods	prom	chr17	gencode::RNF135::ENSG00000181481.9	RNF135	612	7	1.88991	3.70388	0.0167065	0.516111
log-likelihoods	prom	chr1	gencode::THRAP3::ENSG00000054118.9	THRAP3	924	8	2.75622	2.90253	0.0167184	0.516111
log-likelihoods	prom	chr11	gencode::MS4A15::ENSG00000166961.10	MS4A15	947	10	3.92445	2.54813	0.0167375	0.516111
log-likelihoods	prom	chr12	gencode::CLEC2A::ENSG00000188393.4	CLEC2A	925	8	3.48232	2.29732	0.01676	0.516111
log-likelihoods	prom	chr7	gencode::CPED1::ENSG00000106034.13	CPED1	2089	14	6.52799	2.14461	0.0167615	0.516111
log-likelihoods	prom	chr14	gencode::SEL1L::ENSG00000071537.9	SEL1L	839	8	2.92114	2.73866	0.016785	0.516111
log-likelihoods	prom	chr2	gencode::CLHC1::ENSG00000162994.11	CLHC1	583	5	1.06786	4.68224	0.0168242	0.516111
log-likelihoods	prom	chr22	gencode::CACNG2::ENSG00000166862.6	CACNG2	500	5	2.13978	2.33669	0.0168525	0.516111
log-likelihoods	prom	chr1	gencode::SPRR3::ENSG00000163209.10	SPRR3	1366	13	5.97626	2.17527	0.0168652	0.516111
log-likelihoods	prom	chr12	gencode::LACRT::ENSG00000135413.4	LACRT	901	9	3.14051	2.86578	0.0169719	0.518549
log-likelihoods	prom	chr3	gencode::DPPA2::ENSG00000163530.4	DPPA2	764	12	5.4904	2.18563	0.0171192	0.522217
log-likelihoods	prom	chr20	gencode::MACROD2::ENSG00000172264.12	MACROD2	3512	25	12.8476	1.94589	0.0171518	0.52238
log-likelihoods	prom	chr7	gencode::YWHAG::ENSG00000170027.5	YWHAG	688	7	2.44059	2.86816	0.0172443	0.523625
log-likelihoods	prom	chr3	gencode::ABI3BP::ENSG00000154175.12	ABI3BP	1771	13	5.17142	2.51382	0.0172474	0.523625
log-likelihoods	prom	chr19	gencode::KLC3::ENSG00000104892.12	KLC3	1510	9	3.77504	2.38408	0.0172886	0.524048
log-likelihoods	prom	chr7	gencode::POLR2J3::ENSG00000168255.14	POLR2J3	1772	10	4.65922	2.14628	0.0173813	0.526023
log-likelihoods	prom	chr20	gencode::WFDC11::ENSG00000180083.6	WFDC11	936	9	3.00901	2.99102	0.017486	0.527796
log-likelihoods	prom	chr1	gencode::FCN3::ENSG00000142748.8	FCN3	801	7	2.07611	3.37169	0.0174949	0.527796
log-likelihoods	prom	chr5	gencode::PCDHA8::ENSG00000204962.4	PCDHA8	500	6	1.09149	5.49705	0.017701	0.533172
log-likelihoods	prom	chr11	gencode::DNAJB13::ENSG00000187726.4	DNAJB13	1198	10	3.37217	2.96545	0.0177855	0.534877
log-likelihoods	prom	chr17	gencode::ELAC2::ENSG00000006744.14	ELAC2	734	8	3.25847	2.45514	0.0178354	0.535423
log-likelihoods	prom	chr1	gencode::OR2M2::ENSG00000198601.2	OR2M2	500	7	2.49912	2.80098	0.0178596	0.535423
log-likelihoods	prom	chr3	gencode::ROBO1::ENSG00000169855.15	ROBO1	1794	13	6.29852	2.06398	0.0179167	0.536297
log-likelihoods	prom	chr19	gencode::NDUFS7::ENSG00000115286.15	NDUFS7	998	7	3.14012	2.22921	0.0180035	0.538053
log-likelihoods	prom	chr1	gencode::GPATCH3::ENSG00000198746.8	GPATCH3	523	5	1.67419	2.98652	0.0180572	0.538063
log-likelihoods	prom	chr1	gencode::UBAP2L::ENSG00000143569.14	UBAP2L	2011	10	4.30239	2.32429	0.0180622	0.538063
log-likelihoods	prom	chr10	gencode::ACTR1A::ENSG00000138107.7	ACTR1A	919	7	2.50376	2.79579	0.018088	0.538063
log-likelihoods	prom	chr17	gencode::NLK::ENSG00000087095.8	NLK	505	6	2.35711	2.54549	0.0181613	0.539257
log-likelihoods	prom	chr14	gencode::OR4K13::ENSG00000176253.2	OR4K13	500	8	2.47406	3.23355	0.0182112	0.539257
log-likelihoods	prom	chr9	gencode::TMEM245::ENSG00000106771.8	TMEM245	500	5	1.77548	2.81614	0.0182136	0.539257
log-likelihoods	prom	chr10	gencode::ZWINT::ENSG00000122952.12	ZWINT	1567	18	8.26724	2.17727	0.0182408	0.539257
log-likelihoods	prom	chr11	gencode::OR8D1::ENSG00000196341.2	OR8D1	500	8	2.69355	2.97006	0.0183193	0.540745
log-likelihoods	prom	chr18	gencode::SERPINB4::ENSG00000206073.6	SERPINB4	938	8	2.84059	2.81632	0.0184062	0.541871
log-likelihoods	prom	chr7	gencode::SPDYE3::ENSG00000214300.6	SPDYE3	708	5	1.84215	2.71422	0.0184141	0.541871
log-likelihoods	prom	chr2	gencode::ARL5A::ENSG00000162980.12	ARL5A	660	8	3.01846	2.65036	0.018454	0.542213
log-likelihoods	prom	chr9	gencode::MUSK::ENSG00000030304.8	MUSK	2137	14	6.50417	2.15247	0.018485	0.542293
log-likelihoods	prom	chr10	gencode::C10orf115::ENSG00000204566.6	C10orf115	910	8	2.95982	2.70287	0.0185933	0.544635
log-likelihoods	prom	chr2	gencode::RPE::ENSG00000197713.10	RPE	874	9	3.6365	2.47491	0.0186687	0.546009
log-likelihoods	prom	chr20	gencode::RBM39::ENSG00000131051.16	RBM39	987	8	2.85737	2.79978	0.0188669	0.55028
log-likelihoods	prom	chr20	gencode::EPPIN-WFDC6::ENSG00000249139.1	EPPIN-WFDC6	512	6	1.89931	3.15904	0.0188721	0.55028
log-likelihoods	prom	chr22	gencode::PMM1::ENSG00000100417.7	PMM1	826	7	2.47134	2.83247	0.0189521	0.551771
log-likelihoods	prom	chr12	gencode::KLRC1::ENSG00000134545.9	KLRC1	1578	11	4.60409	2.38918	0.0189972	0.552244
log-likelihoods	prom	chr12	gencode::COQ10A::ENSG00000135469.9	COQ10A	1013	7	2.62493	2.66674	0.0190895	0.554087
log-likelihoods	prom	chr1	gencode::FCER1A::ENSG00000179639.6	FCER1A	1840	16	7.13753	2.24167	0.0191728	0.55496
log-likelihoods	prom	chr20	gencode::DEFB127::ENSG00000088782.4	DEFB127	874	8	2.83372	2.82314	0.0191992	0.55496
log-likelihoods	prom	chr1	gencode::SZT2::ENSG00000198198.9	SZT2	1569	8	3.02028	2.64876	0.0192065	0.55496
log-likelihoods	prom	chr17	gencode::TNS4::ENSG00000131746.8	TNS4	934	7	2.14411	3.26475	0.0193266	0.556829
log-likelihoods	prom	chr1	gencode::GCSAML::ENSG00000169224.8	GCSAML	2575	29	15.1325	1.9164	0.0193338	0.556829
log-likelihoods	prom	chr1	gencode::SFPQ::ENSG00000116560.6	SFPQ	500	6	1.90571	3.14844	0.0193584	0.556829
log-likelihoods	prom	chr3	gencode::TATDN2::ENSG00000157014.6	TATDN2	623	6	1.77158	3.3868	0.0194135	0.557579
log-likelihoods	prom	chr11	gencode::OR52N4::ENSG00000181074.3	OR52N4	500	7	1.95802	3.57504	0.019456	0.55782
log-likelihoods	prom	chr19	gencode::DKFZP761J1410::ENSG00000105520.6	DKFZP761J1410	864	7	2.25992	3.09746	0.0194802	0.55782
log-likelihoods	prom	chr16	gencode::CTRB2::ENSG00000168928.8	CTRB2	902	8	2.73094	2.9294	0.0196146	0.560553
log-likelihoods	prom	chr2	gencode::SLC20A1::ENSG00000144136.6	SLC20A1	725	6	2.6758	2.24232	0.0196341	0.560553
log-likelihoods	prom	chr11	gencode::TRIM48::ENSG00000150244.8	TRIM48	868	11	4.42573	2.48547	0.0197746	0.563331
log-likelihoods	prom	chr19	gencode::GPR108::ENSG00000125734.9	GPR108	742	7	2.3212	3.01569	0.0197902	0.563331
log-likelihoods	prom	chr19	gencode::CD209::ENSG00000090659.13	CD209	792	7	2.53231	2.76428	0.0198621	0.564537
log-likelihoods	prom	chr1	gencode::UBE2U::ENSG00000177414.9	UBE2U	688	8	2.58414	3.09581	0.0199877	0.565986
log-likelihoods	prom	chr7	gencode::AC187652.1::ENSG00000269396.1	AC187652.1	585	7	3.05245	2.29324	0.0200032	0.565986
log-likelihoods	prom	chr4	gencode::NUP54::ENSG00000138750.10	NUP54	908	7	2.94439	2.3774	0.0200165	0.565986
log-likelihoods	prom	chr19	gencode::TMEM190::ENSG00000160472.4	TMEM190	882	6	2.44861	2.45037	0.0200312	0.565986
log-likelihoods	prom	chr6	gencode::KLHL31::ENSG00000124743.5	KLHL31	1355	9	4.31447	2.08601	0.0201377	0.568156
log-likelihoods	prom	chr2	gencode::KCNK3::ENSG00000171303.5	KCNK3	590	6	2.49237	2.40735	0.0201693	0.56821
log-likelihoods	prom	chr3	gencode::SACM1L::ENSG00000211456.6	SACM1L	959	6	2.76467	2.17024	0.0202216	0.568848
log-likelihoods	prom	chr3	gencode::ANKUB1::ENSG00000206199.5	ANKUB1	508	5	1.29153	3.87138	0.0203419	0.570281
log-likelihoods	prom	chr20	gencode::DEFB132::ENSG00000186458.4	DEFB132	897	8	3.02766	2.64231	0.020358	0.570281
log-likelihoods	prom	chr1	gencode::SYCP1::ENSG00000198765.7	SYCP1	825	9	3.44282	2.61413	0.0203619	0.570281
log-likelihoods	prom	chr7	gencode::CD36::ENSG00000135218.13	CD36	3523	19	10.0529	1.89	0.0203953	0.570361
log-likelihoods	prom	chr15	gencode::C15orf60::ENSG00000183324.6	C15orf60	817	9	3.38628	2.65779	0.0204243	0.570361
log-likelihoods	prom	chr17	gencode::NXN::ENSG00000167693.12	NXN	2228	12	5.33801	2.24803	0.0205391	0.572734
log-likelihoods	prom	chr1	gencode::B3GALT6::ENSG00000176022.3	B3GALT6	358	5	1.45206	3.44339	0.0206347	0.574563
log-likelihoods	prom	chr17	gencode::PLXDC1::ENSG00000161381.9	PLXDC1	1776	11	5.94448	1.85046	0.0207032	0.575632
log-likelihoods	prom	chr17	gencode::WFIKKN2::ENSG00000173714.7	WFIKKN2	875	7	2.45698	2.84903	0.0207638	0.576331
log-likelihoods	prom	chr14	gencode::KHNYN::ENSG00000100441.5	KHNYN	1170	8	2.99078	2.67489	0.0207929	0.576331
log-likelihoods	prom	chr16	gencode::C16orf47::ENSG00000197445.2	C16orf47	860	7	2.47379	2.82967	0.0208298	0.576331
log-likelihoods	prom	chr2	gencode::SLC39A10::ENSG00000196950.9	SLC39A10	1019	6	2.85986	2.09801	0.0208487	0.576331
log-likelihoods	prom	chr19	gencode::ZNF773::ENSG00000152439.8	ZNF773	825	9	5.1074	1.76215	0.0208965	0.57682
log-likelihoods	prom	chr18	gencode::ADCYAP1::ENSG00000141433.8	ADCYAP1	656	7	2.91379	2.40237	0.0209357	0.577071
log-likelihoods	prom	chr19	gencode::ZNF558::ENSG00000167785.4	ZNF558	2003	16	8.25272	1.93875	0.0210275	0.578359
log-likelihoods	prom	chr12	gencode::KNTC1::ENSG00000184445.7	KNTC1	1831	10	4.2636	2.34544	0.0210983	0.578359
log-likelihoods	prom	chr19	gencode::PPP1R13L::ENSG00000104881.10	PPP1R13L	1440	7	2.53671	2.75948	0.0210984	0.578359
log-likelihoods	prom	chr19	gencode::ZNF260::ENSG00000254004.2	ZNF260	1725	15	7.57777	1.97947	0.0211322	0.578359
log-likelihoods	prom	chr15	gencode::SYNM::ENSG00000182253.10	SYNM	1077	9	3.38026	2.66252	0.0211333	0.578359
log-likelihoods	prom	chr14	gencode::NPC2::ENSG00000119655.4	NPC2	781	9	2.53805	3.54602	0.0212962	0.581986
log-likelihoods	prom	chr12	gencode::TCTN2::ENSG00000168778.7	TCTN2	680	6	1.94136	3.09061	0.0214904	0.585831
log-likelihoods	prom	chr1	gencode::S100A1::ENSG00000160678.7	S100A1	960	4	1.33243	3.00202	0.0214981	0.585831
log-likelihoods	prom	chr2	gencode::UGT1A6::ENSG00000167165.14	UGT1A6	1608	10	3.95158	2.53063	0.021618	0.586023
log-likelihoods	prom	chr3	gencode::OR5H1::ENSG00000231192.1	OR5H1	500	7	2.10879	3.31944	0.0216184	0.586023
log-likelihoods	prom	chr12	gencode::SLC17A8::ENSG00000179520.6	SLC17A8	873	8	3.51465	2.27619	0.0216419	0.586023
log-likelihoods	prom	chr11	gencode::FIBIN::ENSG00000176971.2	FIBIN	500	6	2.11293	2.83966	0.0216755	0.586023
log-likelihoods	prom	chr2	gencode::C2orf80::ENSG00000188674.6	C2orf80	1806	13	6.37615	2.03885	0.0216905	0.586023
log-likelihoods	prom	chr20	gencode::ZNFX1::ENSG00000124201.10	ZNFX1	953	5	1.86778	2.67697	0.0217102	0.586023
log-likelihoods	prom	chr22	gencode::PRR5-ARHGAP8::ENSG00000248405.5	PRR5-ARHGAP8	829	8	2.30403	3.47218	0.0217193	0.586023
log-likelihoods	prom	chr4	gencode::GABRA4::ENSG00000109158.6	GABRA4	500	6	2.57867	2.32678	0.0217794	0.586818
log-likelihoods	prom	chr1	gencode::CDC42SE1::ENSG00000197622.8	CDC42SE1	714	7	2.54221	2.7535	0.0218457	0.587778
log-likelihoods	prom	chr6	gencode::PI16::ENSG00000164530.9	PI16	500	5	1.19402	4.18752	0.0219657	0.589827
log-likelihoods	prom	chr3	gencode::SCN10A::ENSG00000185313.6	SCN10A	728	9	3.37171	2.66927	0.0219949	0.589827
log-likelihoods	prom	chr12	gencode::NAV3::ENSG00000067798.9	NAV3	1183	12	6.02817	1.99065	0.0220142	0.589827
log-likelihoods	prom	chr7	gencode::HIP1::ENSG00000127946.12	HIP1	857	8	3.2625	2.45211	0.0220902	0.591036
log-likelihoods	prom	chr1	gencode::MRPS15::ENSG00000116898.7	MRPS15	706	5	2.06305	2.4236	0.0221728	0.592419
log-likelihoods	prom	chr3	gencode::GAP43::ENSG00000172020.8	GAP43	788	8	3.28873	2.43255	0.0222364	0.593289
log-likelihoods	prom	chr5	gencode::ANKHD1::ENSG00000131503.16	ANKHD1	1193	7	2.67875	2.61316	0.0223998	0.596818
log-likelihoods	prom	chr1	gencode::NRD1::ENSG00000078618.15	NRD1	1214	7	3.12289	2.24151	0.0224745	0.597977
log-likelihoods	prom	chr18	gencode::CETN1::ENSG00000177143.3	CETN1	500	6	2.31771	2.58876	0.0225265	0.598529
log-likelihoods	prom	chr10	gencode::SYNPO2L::ENSG00000166317.7	SYNPO2L	1619	11	4.20108	2.61837	0.0226049	0.599782
log-likelihoods	prom	chr11	gencode::DLG2::ENSG00000150672.12	DLG2	6123	43	22.5311	1.90847	0.0226944	0.599891
log-likelihoods	prom	chr14	gencode::OR4N5::ENSG00000184394.1	OR4N5	500	6	1.96439	3.05438	0.0227103	0.599891
log-likelihoods	prom	chr2	gencode::SSB::ENSG00000138385.11	SSB	1060	7	2.90829	2.40691	0.0227243	0.599891
log-likelihoods	prom	chr1	gencode::ZNF683::ENSG00000176083.13	ZNF683	931	6	2.51852	2.38236	0.0227343	0.599891
log-likelihoods	prom	chr11	gencode::FOLR2::ENSG00000165457.9	FOLR2	853	6	2.02931	2.95667	0.0229182	0.603116
log-likelihoods	prom	chr1	gencode::ACTL8::ENSG00000117148.6	ACTL8	806	7	2.59867	2.69368	0.0229195	0.603116
log-likelihoods	prom	chr9	gencode::OR1N2::ENSG00000171501.7	OR1N2	500	6	1.98867	3.01709	0.0230246	0.604954
log-likelihoods	prom	chr5	gencode::C1QTNF3::ENSG00000082196.16	C1QTNF3	607	6	2.55323	2.34997	0.0230598	0.604954
log-likelihoods	prom	chr17	gencode::UTP18::ENSG00000011260.9	UTP18	560	6	2.2572	2.65816	0.0230841	0.604954
log-likelihoods	prom	chr5	gencode::NLN::ENSG00000123213.18	NLN	610	5	1.67724	2.98108	0.0232188	0.606257
log-likelihoods	prom	chr17	gencode::KRTAP4-1::ENSG00000198443.5	KRTAP4-1	500	5	1.60906	3.1074	0.0232206	0.606257
log-likelihoods	prom	chr1	gencode::INSL5::ENSG00000172410.4	INSL5	788	7	2.86889	2.43996	0.023266	0.606257
log-likelihoods	prom	chr11	gencode::VPS11::ENSG00000160695.10	VPS11	769	6	2.27303	2.63965	0.0232899	0.606257
log-likelihoods	prom	chr19	gencode::OR7A17::ENSG00000185385.2	OR7A17	500	6	1.84699	3.24853	0.023292	0.606257
log-likelihoods	prom	chr8	gencode::SLA::ENSG00000155926.9	SLA	1677	12	4.30186	2.78949	0.0234616	0.608132
log-likelihoods	prom	chr17	gencode::GLP2R::ENSG00000065325.8	GLP2R	1106	8	3.07979	2.59758	0.0234672	0.608132
log-likelihoods	prom	chr14	gencode::LIN52::ENSG00000205659.6	LIN52	651	5	1.75323	2.85188	0.0234692	0.608132
log-likelihoods	prom	chr17	gencode::ZNF286B::ENSG00000249459.4	ZNF286B	853	7	3.31834	2.10949	0.0235061	0.608132
log-likelihoods	prom	chr19	gencode::AC025278.1::ENSG00000204752.3	AC025278.1	500	6	1.76257	3.40412	0.0235506	0.608132
log-likelihoods	prom	chr10	gencode::MTRNR2L5::ENSG00000249860.2	MTRNR2L5	500	7	2.55489	2.73984	0.0235629	0.608132
log-likelihoods	prom	chr3	gencode::ZIC4::ENSG00000174963.13	ZIC4	2097	25	13.8341	1.80713	0.0235863	0.608132
log-likelihoods	prom	chr1	gencode::NHLH2::ENSG00000177551.5	NHLH2	500	5	1.7985	2.7801	0.0237086	0.610266
log-likelihoods	prom	chr20	gencode::CSTL1::ENSG00000125823.8	CSTL1	1092	12	4.81479	2.49232	0.0237327	0.610266
log-likelihoods	prom	chr3	gencode::PARP15::ENSG00000173200.8	PARP15	1527	11	4.55881	2.41291	0.0237739	0.610458
log-likelihoods	prom	chr17	gencode::TMUB2::ENSG00000168591.11	TMUB2	1395	8	3.10917	2.57304	0.0238126	0.610458
log-likelihoods	prom	chr11	gencode::POLD3::ENSG00000077514.4	POLD3	565	5	1.71961	2.90763	0.0238358	0.610458
log-likelihoods	prom	chr16	gencode::RP11-20I23.1::ENSG00000260272.1	RP11-20I23.1	500	5	1.2066	4.14388	0.0239448	0.61189
log-likelihoods	prom	chr14	gencode::CLEC14A::ENSG00000176435.6	CLEC14A	500	6	2.16973	2.76533	0.0239556	0.61189
log-likelihoods	prom	chr5	gencode::PCDHA7::ENSG00000204963.4	PCDHA7	500	4	1.07014	3.73783	0.0240272	0.612902
log-likelihoods	prom	chr4	gencode::YIPF7::ENSG00000177752.10	YIPF7	923	10	4.31362	2.31824	0.0240865	0.613597
log-likelihoods	prom	chr20	gencode::TGM6::ENSG00000166948.5	TGM6	930	9	3.54163	2.5412	0.0241677	0.614081
log-likelihoods	prom	chr20	gencode::C20orf144::ENSG00000149609.5	C20orf144	810	5	1.27383	3.92516	0.0241696	0.614081
log-likelihoods	prom	chr17	gencode::KCTD2::ENSG00000180901.6	KCTD2	1475	11	4.47129	2.46014	0.0242619	0.614433
log-likelihoods	prom	chr9	gencode::OMD::ENSG00000127083.7	OMD	738	4	0.887638	4.50634	0.0242683	0.614433
log-likelihoods	prom	chr12	gencode::IQCD::ENSG00000166578.5	IQCD	810	7	2.5046	2.79486	0.0242797	0.614433
log-likelihoods	prom	chr14	gencode::ANG::ENSG00000214274.5	ANG	1319	8	3.71263	2.15481	0.0243893	0.614937
log-likelihoods	prom	chr3	gencode::ALG1L::ENSG00000189366.5	ALG1L	856	6	2.97421	2.01734	0.0244118	0.614937
log-likelihoods	prom	chr1	gencode::OR2T12::ENSG00000177201.1	OR2T12	500	7	2.73078	2.56337	0.024417	0.614937
log-likelihoods	prom	chr9	gencode::TMC1::ENSG00000165091.11	TMC1	2687	17	8.40248	2.02321	0.024428	0.614937
log-likelihoods	prom	chr16	gencode::RP11-196G11.1::ENSG00000255439.2	RP11-196G11.1	434	4	1.41963	2.81764	0.0244849	0.61556
log-likelihoods	prom	chr14	gencode::ERH::ENSG00000100632.6	ERH	491	5	1.45468	3.43717	0.0246159	0.617687
log-likelihoods	prom	chr6	gencode::MPC1::ENSG00000060762.14	MPC1	805	8	3.77351	2.12004	0.0246409	0.617687
log-likelihoods	prom	chr2	gencode::AC104794.4::ENSG00000233502.1	AC104794.4	833	8	2.50592	3.19244	0.0246973	0.617687
log-likelihoods	prom	chr16	gencode::SEPT1::ENSG00000180096.7	2001-09-01	787	5	1.56747	3.18985	0.0246985	0.617687
log-likelihoods	prom	chr8	gencode::AARD::ENSG00000205002.3	AARD	629	6	2.21511	2.70867	0.0247925	0.619231
log-likelihoods	prom	chr19	gencode::EMR3::ENSG00000131355.10	EMR3	1686	12	5.14374	2.33293	0.0249584	0.621471
log-likelihoods	prom	chr19	gencode::MIA::ENSG00000261857.2	MIA	693	5	1.75332	2.85173	0.0249676	0.621471
log-likelihoods	prom	chr17	gencode::RP11-477N12.3::ENSG00000214978.6	RP11-477N12.3	606	5	1.76728	2.82921	0.02499	0.621471
log-likelihoods	prom	chr19	gencode::MEGF8::ENSG00000105429.8	MEGF8	1614	11	3.98676	2.75913	0.025012	0.621471
log-likelihoods	prom	chr13	gencode::DIAPH3::ENSG00000139734.13	DIAPH3	818	9	3.78277	2.37921	0.0252086	0.624491
log-likelihoods	prom	chr8	gencode::SLC7A13::ENSG00000164893.4	SLC7A13	500	6	2.23294	2.68704	0.0252413	0.624491
log-likelihoods	prom	chr2	gencode::IL36RN::ENSG00000136695.10	IL36RN	1166	11	3.6807	2.98856	0.0253055	0.624491
log-likelihoods	prom	chr13	gencode::AL354808.2::ENSG00000269591.1	AL354808.2	500	5	1.29952	3.84757	0.0253276	0.624491
log-likelihoods	prom	chr1	gencode::S100A16::ENSG00000188643.6	S100A16	2191	10	4.931	2.02799	0.0253521	0.624491
log-likelihoods	prom	chr1	gencode::NMNAT2::ENSG00000157064.6	NMNAT2	1371	10	4.48929	2.22753	0.0253611	0.624491
log-likelihoods	prom	chr10	gencode::C10orf53::ENSG00000178645.8	C10orf53	889	8	3.32312	2.40737	0.0253617	0.624491
log-likelihoods	prom	chr2	gencode::AC007557.1::ENSG00000223874.1	AC007557.1	789	8	3.11666	2.56685	0.0254207	0.62514
log-likelihoods	prom	chr6	gencode::CRISP3::ENSG00000096006.7	CRISP3	1821	18	8.76713	2.05312	0.0254911	0.626068
log-likelihoods	prom	chr8	gencode::RALYL::ENSG00000184672.7	RALYL	2179	19	11.5076	1.65109	0.0255641	0.627057
log-likelihoods	prom	chr1	gencode::ILF2::ENSG00000143621.12	ILF2	933	7	2.45211	2.85469	0.0256723	0.628906
log-likelihoods	prom	chr8	gencode::CYP11B2::ENSG00000179142.2	CYP11B2	756	9	3.54988	2.5353	0.0257464	0.629915
log-likelihoods	prom	chr6	gencode::HINT3::ENSG00000111911.5	HINT3	600	5	1.87303	2.66946	0.0258148	0.630245
log-likelihoods	prom	chr17	gencode::DNAH17::ENSG00000187775.12	DNAH17	898	6	2.19597	2.73227	0.02583	0.630245
log-likelihoods	prom	chr9	gencode::NOL8::ENSG00000198000.7	NOL8	879	4	0.993817	4.02489	0.0258948	0.630245
log-likelihoods	prom	chr8	gencode::SLC30A8::ENSG00000164756.8	SLC30A8	2319	17	8.33447	2.03972	0.0259069	0.630245
log-likelihoods	prom	chr19	gencode::FUT3::ENSG00000171124.8	FUT3	938	8	2.57029	3.11249	0.0259382	0.630245
log-likelihoods	prom	chr16	gencode::RPL3L::ENSG00000140986.7	RPL3L	900	7	2.64964	2.64187	0.0259573	0.630245
log-likelihoods	prom	chr5	gencode::PDLIM7::ENSG00000196923.9	PDLIM7	964	9	3.31139	2.71789	0.0259954	0.630372
log-likelihoods	prom	chr1	gencode::FMN2::ENSG00000155816.15	FMN2	1723	16	8.71266	1.83641	0.0260377	0.630599
log-likelihoods	prom	chr12	gencode::PUS1::ENSG00000177192.9	PUS1	617	5	2.14294	2.33325	0.0260848	0.630944
log-likelihoods	prom	chr9	gencode::ERCC6L2::ENSG00000182150.11	ERCC6L2	1977	10	5.12435	1.95147	0.0263179	0.635779
log-likelihoods	prom	chr1	gencode::CTSS::ENSG00000163131.6	CTSS	903	6	2.14904	2.79194	0.0264602	0.637979
log-likelihoods	prom	chr19	gencode::KLK7::ENSG00000169035.7	KLK7	987	10	4.87548	2.05108	0.0264756	0.637979
log-likelihoods	prom	chr7	gencode::WNT16::ENSG00000002745.8	WNT16	1497	12	5.8452	2.05297	0.0265591	0.639188
log-likelihoods	prom	chr21	gencode::KRTAP12-3::ENSG00000205439.8	KRTAP12-3	590	6	1.91106	3.13962	0.026707	0.64194
log-likelihoods	prom	chr12	gencode::HNRNPA1::ENSG00000135486.13	HNRNPA1	858	5	1.94443	2.57145	0.0267908	0.642237
log-likelihoods	prom	chr16	gencode::NFATC2IP::ENSG00000176953.6	NFATC2IP	1162	8	3.43291	2.33038	0.0268041	0.642237
log-likelihoods	prom	chr16	gencode::GP2::ENSG00000169347.12	GP2	957	13	4.98067	2.61009	0.02682	0.642237
log-likelihoods	prom	chr1	gencode::CLSPN::ENSG00000092853.9	CLSPN	916	7	3.41365	2.05059	0.026934	0.643449
log-likelihoods	prom	chr3	gencode::EIF4A2::ENSG00000156976.10	EIF4A2	955	8	3.38633	2.36244	0.0269808	0.643449
log-likelihoods	prom	chr9	gencode::IFNA7::ENSG00000214042.1	IFNA7	500	5	1.71025	2.92355	0.0269849	0.643449
log-likelihoods	prom	chr17	gencode::MED31::ENSG00000108590.6	MED31	506	3	0.928975	3.22937	0.0270356	0.643449
log-likelihoods	prom	chr12	gencode::KRT84::ENSG00000161849.3	KRT84	500	4	1.29233	3.09518	0.0270385	0.643449
log-likelihoods	prom	chr3	gencode::CGGBP1::ENSG00000163320.6	CGGBP1	1551	8	3.51642	2.27504	0.0271542	0.644324
log-likelihoods	prom	chr17	gencode::MTRNR2L1::ENSG00000256618.1	MTRNR2L1	500	8	2.71905	2.9422	0.0271726	0.644324
log-likelihoods	prom	chr1	gencode::C4BPA::ENSG00000123838.6	C4BPA	829	8	2.25313	3.55062	0.0272151	0.644324
log-likelihoods	prom	chr2	gencode::REG1A::ENSG00000115386.5	REG1A	827	11	4.69051	2.34516	0.0272227	0.644324
log-likelihoods	prom	chr2	gencode::METTL8::ENSG00000123600.14	METTL8	458	4	1.04492	3.82803	0.0272434	0.644324
log-likelihoods	prom	chr14	gencode::TMEM179::ENSG00000258986.2	TMEM179	500	6	1.59367	3.7649	0.0273324	0.64563
log-likelihoods	prom	chr1	gencode::DPH2::ENSG00000132768.9	DPH2	700	8	2.12181	3.77037	0.0273768	0.645805
log-likelihoods	prom	chr9	gencode::TYRP1::ENSG00000107165.8	TYRP1	1602	10	4.48561	2.22935	0.0274119	0.645805
log-likelihoods	prom	chr5	gencode::KIAA0947::ENSG00000164151.7	KIAA0947	692	9	3.44361	2.61353	0.0274409	0.645805
log-likelihoods	prom	chr19	gencode::AC074212.3::ENSG00000237452.2	AC074212.3	582	6	1.96145	3.05896	0.0275053	0.646526
log-likelihoods	prom	chr20	gencode::DDX27::ENSG00000124228.10	DDX27	803	6	2.05424	2.92079	0.0275794	0.64736
log-likelihoods	prom	chr17	gencode::KRT35::ENSG00000197079.4	KRT35	500	5	1.51424	3.30199	0.0276084	0.64736
log-likelihoods	prom	chr19	gencode::FAM32A::ENSG00000105058.7	FAM32A	655	6	2.23599	2.68338	0.0277533	0.647526
log-likelihoods	prom	chr3	gencode::WDR5B::ENSG00000196981.2	WDR5B	500	6	1.9302	3.10849	0.0278115	0.647526
log-likelihoods	prom	chr16	gencode::RABEP2::ENSG00000177548.8	RABEP2	904	6	2.53259	2.36912	0.0278575	0.647526
log-likelihoods	prom	chr3	gencode::MOBP::ENSG00000168314.13	MOBP	1849	13	7.00478	1.85588	0.0278824	0.647526
log-likelihoods	prom	chr17	gencode::OR1D2::ENSG00000184166.1	OR1D2	500	6	1.55104	3.86837	0.0278836	0.647526
log-likelihoods	prom	chr7	gencode::FOXP2::ENSG00000128573.18	FOXP2	4049	28	16.8078	1.66589	0.0278921	0.647526
log-likelihoods	prom	chr7	gencode::OR2A12::ENSG00000221858.2	OR2A12	500	6	2.14764	2.79376	0.0279073	0.647526
log-likelihoods	prom	chr12	gencode::CLEC6A::ENSG00000205846.3	CLEC6A	781	9	2.8834	3.12132	0.0279182	0.647526
log-likelihoods	prom	chr22	gencode::CDC45::ENSG00000093009.5	CDC45	967	7	3.1747	2.20493	0.0279197	0.647526
log-likelihoods	prom	chr9	gencode::RMI1::ENSG00000178966.11	RMI1	637	5	2.13947	2.33703	0.028094	0.650221
log-likelihoods	prom	chr16	gencode::TBC1D10B::ENSG00000169221.9	TBC1D10B	500	6	2.19898	2.72854	0.0281037	0.650221
log-likelihoods	prom	chr6	gencode::DPCR1::ENSG00000168631.7	DPCR1	916	7	2.52275	2.77475	0.028148	0.650421
log-likelihoods	prom	chr11	gencode::PCNXL3::ENSG00000197136.4	PCNXL3	500	5	1.79938	2.77873	0.0281832	0.650421
log-likelihoods	prom	chr2	gencode::UGT1A1::ENSG00000241635.3	UGT1A1	2396	13	6.07798	2.13887	0.0282142	0.650421
log-likelihoods	prom	chr12	gencode::IAPP::ENSG00000121351.3	IAPP	1771	18	8.31202	2.16554	0.0283271	0.652238
log-likelihoods	prom	chr14	gencode::OR4K15::ENSG00000169488.5	OR4K15	500	6	2.34817	2.55518	0.028362	0.652258
log-likelihoods	prom	chr11	gencode::TREH::ENSG00000118094.7	TREH	886	6	2.64586	2.26769	0.0284841	0.654281
log-likelihoods	prom	chr7	gencode::PVRIG::ENSG00000213413.2	PVRIG	808	4	1.39834	2.86054	0.028545	0.654893
log-likelihoods	prom	chr19	gencode::ADAMTS10::ENSG00000142303.9	ADAMTS10	2462	13	6.36717	2.04172	0.0286079	0.655552
log-likelihoods	prom	chr18	gencode::TXNDC2::ENSG00000168454.10	TXNDC2	690	5	1.85159	2.70037	0.0286728	0.656254
log-likelihoods	prom	chr5	gencode::PCDHA1::ENSG00000204970.5	PCDHA1	500	6	1.61312	3.71951	0.0287634	0.657069
log-likelihoods	prom	chr17	gencode::KRTAP4-7::ENSG00000240871.3	KRTAP4-7	500	5	1.77316	2.81982	0.028777	0.657069
log-likelihoods	prom	chr14	gencode::FRMD6::ENSG00000139926.11	FRMD6	3444	21	10.4892	2.00206	0.0288774	0.658576
log-likelihoods	prom	chr1	gencode::CD48::ENSG00000117091.5	CD48	876	10	3.58038	2.793	0.0289503	0.659454
log-likelihoods	prom	chr1	gencode::DHDDS::ENSG00000117682.12	DHDDS	976	6	2.67733	2.24104	0.0289978	0.659753
log-likelihoods	prom	chr8	gencode::CCAR2::ENSG00000158941.12	CCAR2	1439	8	3.13004	2.55587	0.0290357	0.65983
log-likelihoods	prom	chr19	gencode::MRPL4::ENSG00000105364.9	MRPL4	655	5	1.94531	2.57028	0.0290799	0.659951
log-likelihoods	prom	chr1	gencode::EPS8L3::ENSG00000198758.6	EPS8L3	915	7	2.49914	2.80096	0.0291099	0.659951
log-likelihoods	prom	chr15	gencode::AC069368.3::ENSG00000249240.2	AC069368.3	858	6	2.73095	2.19704	0.0291897	0.660977
log-likelihoods	prom	chr17	gencode::HN1::ENSG00000189159.11	HN1	705	6	1.99961	3.00059	0.0292699	0.662011
log-likelihoods	prom	chr6	gencode::SLC17A1::ENSG00000124568.6	SLC17A1	1862	16	7.65214	2.09092	0.0293376	0.66276
log-likelihoods	prom	chr1	gencode::CSF3R::ENSG00000119535.13	CSF3R	2378	12	5.27398	2.27532	0.0294047	0.663052
log-likelihoods	prom	chr12	gencode::MYRFL::ENSG00000166268.6	MYRFL	2492	18	9.11692	1.97435	0.0294332	0.663052
log-likelihoods	prom	chr15	gencode::STRA6::ENSG00000137868.14	STRA6	3165	17	8.1552	2.08456	0.0294843	0.663052
log-likelihoods	prom	chr11	gencode::PRR5L::ENSG00000135362.9	PRR5L	2398	12	5.56796	2.15519	0.029489	0.663052
log-likelihoods	prom	chr7	gencode::CDHR3::ENSG00000128536.11	CDHR3	929	8	3.13079	2.55527	0.0296001	0.66345
log-likelihoods	prom	chr20	gencode::ZNF334::ENSG00000198185.7	ZNF334	1166	12	5.17302	2.31973	0.0296176	0.66345
log-likelihoods	prom	chr15	gencode::MAP2K1::ENSG00000169032.5	MAP2K1	1408	7	3.21152	2.17965	0.0296271	0.66345
log-likelihoods	prom	chr20	gencode::FAM182B::ENSG00000175170.10	FAM182B	1656	21	12.8646	1.63238	0.0296452	0.66345
log-likelihoods	prom	chr8	gencode::CSMD3::ENSG00000164796.13	CSMD3	1556	17	10.0723	1.6878	0.0297254	0.664468
log-likelihoods	prom	chr7	gencode::BPGM::ENSG00000172331.7	BPGM	762	6	2.5047	2.39549	0.0298967	0.667381
log-likelihoods	prom	chr1	gencode::AMY2A::ENSG00000243480.3	AMY2A	766	7	2.83187	2.47186	0.0299349	0.667381
log-likelihoods	prom	chr17	gencode::BRIP1::ENSG00000136492.4	BRIP1	1633	10	4.84986	2.06191	0.0299602	0.667381
log-likelihoods	prom	chr2	gencode::MBD5::ENSG00000204406.7	MBD5	935	7	2.31141	3.02846	0.0300678	0.66799
log-likelihoods	prom	chr5	gencode::PCDHGA5::ENSG00000253485.1	PCDHGA5	500	2	0.635367	3.14779	0.0300878	0.66799
log-likelihoods	prom	chr6	gencode::IL17F::ENSG00000112116.9	IL17F	857	8	3.33974	2.39539	0.0301218	0.66799
log-likelihoods	prom	chr5	gencode::PCDH12::ENSG00000113555.4	PCDH12	500	4	1.53395	2.60764	0.0301509	0.66799
log-likelihoods	prom	chr9	gencode::REXO4::ENSG00000148300.7	REXO4	662	4	1.41358	2.8297	0.0301619	0.66799
log-likelihoods	prom	chr12	gencode::C12orf54::ENSG00000177627.5	C12orf54	1535	13	5.11151	2.54328	0.0302629	0.668514
log-likelihoods	prom	chr16	gencode::PRSS21::ENSG00000007038.6	PRSS21	861	7	2.83716	2.46725	0.0302996	0.668514
log-likelihoods	prom	chr21	gencode::AP000322.53::ENSG00000243627.4	AP000322.53	864	9	3.28944	2.73603	0.0303226	0.668514
log-likelihoods	prom	chr12	gencode::EPYC::ENSG00000083782.3	EPYC	918	8	3.16044	2.53129	0.0303251	0.668514
log-likelihoods	prom	chr11	gencode::IGSF9B::ENSG00000080854.10	IGSF9B	703	10	4.48128	2.2315	0.0303999	0.669212
log-likelihoods	prom	chr6	gencode::PLG::ENSG00000122194.14	PLG	886	8	3.62298	2.20813	0.0304445	0.669212
log-likelihoods	prom	chr12	gencode::RPS26::ENSG00000197728.5	RPS26	721	4	2.12156	1.88541	0.0304616	0.669212
log-likelihoods	prom	chr12	gencode::ITFG2::ENSG00000111203.7	ITFG2	834	7	2.64184	2.64967	0.0305304	0.66961
log-likelihoods	prom	chr7	gencode::LRRC17::ENSG00000128606.8	LRRC17	787	5	1.94848	2.5661	0.0305496	0.66961
log-likelihoods	prom	chr14	gencode::TCL1B::ENSG00000213231.8	TCL1B	785	8	3.60043	2.22196	0.0305864	0.66965
log-likelihoods	prom	chr5	gencode::IL7R::ENSG00000168685.10	IL7R	830	8	2.73322	2.92695	0.0307578	0.672446
log-likelihoods	prom	chr1	gencode::PHF13::ENSG00000116273.5	PHF13	577	6	2.34167	2.56227	0.0307969	0.672446
log-likelihoods	prom	chr1	gencode::SZRD1::ENSG00000055070.12	SZRD1	954	8	2.4624	3.24886	0.0308379	0.672446
log-likelihoods	prom	chr8	gencode::CDCA2::ENSG00000184661.9	CDCA2	723	9	3.19616	2.81588	0.0308777	0.672446
log-likelihoods	prom	chr16	gencode::VKORC1::ENSG00000167397.10	VKORC1	1117	7	3.41603	2.04916	0.0309715	0.672446
log-likelihoods	prom	chr5	gencode::ZNF354C::ENSG00000177932.6	ZNF354C	746	9	4.65152	1.93485	0.0309869	0.672446
log-likelihoods	prom	chr19	gencode::EIF3G::ENSG00000130811.6	EIF3G	884	7	2.51525	2.78303	0.0309881	0.672446
log-likelihoods	prom	chr18	gencode::GTSCR1::ENSG00000263417.2	GTSCR1	896	8	3.20127	2.49901	0.0310134	0.672446
log-likelihoods	prom	chr6	gencode::TREM2::ENSG00000095970.12	TREM2	937	10	3.42436	2.92026	0.03103	0.672446
log-likelihoods	prom	chr4	gencode::UGT2A3::ENSG00000135220.6	UGT2A3	682	7	2.39916	2.91768	0.0311646	0.672921
log-likelihoods	prom	chr2	gencode::INHA::ENSG00000123999.4	INHA	550	4	1.84715	2.1655	0.0311706	0.672921
log-likelihoods	prom	chr2	gencode::VRK2::ENSG00000028116.12	VRK2	1653	12	5.83647	2.05604	0.0312012	0.672921
log-likelihoods	prom	chr6	gencode::MRPL2::ENSG00000112651.7	MRPL2	361	3	0.904557	3.31654	0.0312022	0.672921
log-likelihoods	prom	chr1	gencode::LPPR4::ENSG00000117600.8	LPPR4	1249	13	5.7462	2.26237	0.0312276	0.672921
log-likelihoods	prom	chr12	gencode::RAD52::ENSG00000002016.12	RAD52	2597	16	8.04388	1.98909	0.0312727	0.673051
log-likelihoods	prom	chr1	gencode::S100A8::ENSG00000143546.5	S100A8	857	8	2.76048	2.89805	0.0313039	0.673051
log-likelihoods	prom	chr4	gencode::ASIC5::ENSG00000256394.2	ASIC5	911	10	3.72537	2.6843	0.0314038	0.673655
log-likelihoods	prom	chr1	gencode::RCC1::ENSG00000180198.11	RCC1	1916	10	4.82876	2.07093	0.0314106	0.673655
log-likelihoods	prom	chr2	gencode::SP140L::ENSG00000185404.12	SP140L	1860	15	6.91224	2.17006	0.0314375	0.673655
log-likelihoods	prom	chr1	gencode::SASS6::ENSG00000156876.8	SASS6	691	8	2.48088	3.22466	0.0315032	0.673948
log-likelihoods	prom	chr2	gencode::AC092687.4::ENSG00000232056.1	AC092687.4	963	9	3.59104	2.50624	0.0315215	0.673948
log-likelihoods	prom	chr19	gencode::CFD::ENSG00000197766.3	CFD	922	6	2.83496	2.11644	0.0315765	0.674371
log-likelihoods	prom	chr16	gencode::TMEM231::ENSG00000205084.6	TMEM231	563	5	1.58336	3.15785	0.0316149	0.674439
log-likelihoods	prom	chr4	gencode::PLAC8::ENSG00000145287.6	PLAC8	2671	14	6.80715	2.05666	0.0317098	0.675286
log-likelihoods	prom	chr1	gencode::RIT1::ENSG00000143622.6	RIT1	1071	7	2.80695	2.49381	0.0317251	0.675286
log-likelihoods	prom	chr12	gencode::PCBP2::ENSG00000197111.11	PCBP2	2677	11	5.73579	1.91778	0.0318106	0.676354
log-likelihoods	prom	chr19	gencode::EMR2::ENSG00000127507.13	EMR2	2437	12	6.93339	1.73076	0.0318596	0.676646
log-likelihoods	prom	chr3	gencode::MTRNR2L12::ENSG00000269028.2	MTRNR2L12	500	8	2.76727	2.89093	0.0319716	0.677402
log-likelihoods	prom	chr9	gencode::CLIC3::ENSG00000169583.12	CLIC3	705	5	1.8628	2.68413	0.032032	0.677402
log-likelihoods	prom	chr3	gencode::RASA2::ENSG00000155903.7	RASA2	830	6	2.88322	2.08101	0.0320428	0.677402
log-likelihoods	prom	chr13	gencode::MRPS31::ENSG00000102738.6	MRPS31	809	8	3.1194	2.5646	0.0320469	0.677402
log-likelihoods	prom	chr19	gencode::PAFAH1B3::ENSG00000079462.3	PAFAH1B3	526	3	1.04359	2.8747	0.0320946	0.677402
log-likelihoods	prom	chr10	gencode::BCCIP::ENSG00000107949.12	BCCIP	639	5	1.70811	2.92722	0.0321397	0.677402
log-likelihoods	prom	chr1	gencode::GNPAT::ENSG00000116906.7	GNPAT	596	5	1.54874	3.22842	0.0321427	0.677402
log-likelihoods	prom	chr16	gencode::CENPT::ENSG00000102901.8	CENPT	1947	7	2.7381	2.55652	0.0322039	0.677945
log-likelihoods	prom	chr4	gencode::COX7B2::ENSG00000170516.12	COX7B2	2800	25	14.9536	1.67184	0.0322481	0.67813
log-likelihoods	prom	chr19	gencode::CTB-60B18.6::ENSG00000267335.2	CTB-60B18.6	628	6	2.02878	2.95744	0.0323602	0.679224
log-likelihoods	prom	chr8	gencode::CHCHD7::ENSG00000170791.13	CHCHD7	1689	14	6.6092	2.11826	0.032371	0.679224
log-likelihoods	prom	chr2	gencode::C1D::ENSG00000197223.7	C1D	960	9	3.52358	2.55422	0.0324862	0.679949
log-likelihoods	prom	chr19	gencode::C19orf59::ENSG00000183019.3	C19orf59	910	8	2.85293	2.80413	0.0325322	0.679949
log-likelihoods	prom	chr12	gencode::SLCO1B7::ENSG00000205754.6	SLCO1B7	1760	16	6.93753	2.3063	0.0325465	0.679949
log-likelihoods	prom	chr5	gencode::IL3::ENSG00000164399.4	IL3	612	6	2.21045	2.71438	0.0325476	0.679949
log-likelihoods	prom	chr11	gencode::ANKRD42::ENSG00000137494.9	ANKRD42	914	7	2.95907	2.36561	0.0328218	0.684826
log-likelihoods	prom	chr5	gencode::PCDHGC4::ENSG00000242419.1	PCDHGC4	500	2	0.687454	2.90929	0.0328525	0.684826
log-likelihoods	prom	chr2	gencode::SLC30A6::ENSG00000152683.10	SLC30A6	963	7	2.68259	2.60942	0.0329345	0.68579
log-likelihoods	prom	chr19	gencode::LAIR1::ENSG00000167613.11	LAIR1	1744	16	7.00623	2.28368	0.0330085	0.686584
log-likelihoods	prom	chr11	gencode::GPR137::ENSG00000173264.9	GPR137	1305	7	2.53965	2.75629	0.0330903	0.68754
log-likelihoods	prom	chr7	gencode::C7orf62::ENSG00000164645.2	C7orf62	916	11	4.85366	2.26633	0.0331398	0.687821
log-likelihoods	prom	chr15	gencode::CYP1A2::ENSG00000140505.6	CYP1A2	944	7	2.59335	2.69921	0.0332169	0.68795
log-likelihoods	prom	chr2	gencode::OBSL1::ENSG00000124006.10	OBSL1	1223	7	3.34675	2.09158	0.0332319	0.68795
log-likelihoods	prom	chr6	gencode::AKIRIN2::ENSG00000135334.8	AKIRIN2	500	6	2.04799	2.9297	0.0332537	0.68795
log-likelihoods	prom	chr3	gencode::SI::ENSG00000090402.3	SI	935	9	3.33627	2.69762	0.033348	0.688211
log-likelihoods	prom	chr11	gencode::AC132216.1::ENSG00000184566.2	AC132216.1	500	3	1.12896	2.6573	0.0333702	0.688211
log-likelihoods	prom	chr11	gencode::BTBD18::ENSG00000233436.3	BTBD18	848	7	2.61664	2.67518	0.0333741	0.688211
log-likelihoods	prom	chr1	gencode::TRIM58::ENSG00000162722.8	TRIM58	530	9	4.41129	2.04022	0.0334111	0.688233
log-likelihoods	prom	chr9	gencode::CDKN2A::ENSG00000147889.12	CDKN2A	2092	11	5.63824	1.95096	0.0334887	0.689005
log-likelihoods	prom	chr14	gencode::KLHL28::ENSG00000179454.9	KLHL28	1205	9	3.8205	2.35571	0.0335415	0.689005
log-likelihoods	prom	chr1	gencode::CHIT1::ENSG00000133063.11	CHIT1	938	7	2.85646	2.45059	0.0335565	0.689005
log-likelihoods	prom	chr5	gencode::CDKL3::ENSG00000006837.7	CDKL3	1886	11	4.73573	2.32277	0.0336565	0.689661
log-likelihoods	prom	chr1	gencode::C1orf68::ENSG00000198854.4	C1orf68	500	6	2.318	2.58844	0.0336959	0.689661
log-likelihoods	prom	chr1	gencode::CRTC2::ENSG00000160741.12	CRTC2	739	6	2.44442	2.45457	0.0336964	0.689661
log-likelihoods	prom	chr16	gencode::AC025287.1::ENSG00000214325.2	AC025287.1	866	7	3.00138	2.33226	0.0337969	0.689985
log-likelihoods	prom	chr19	gencode::PRMT1::ENSG00000126457.16	PRMT1	1534	11	4.94771	2.22325	0.0338267	0.689985
log-likelihoods	prom	chr14	gencode::DIO2::ENSG00000211448.7	DIO2	2430	15	7.42485	2.02024	0.0338795	0.689985
log-likelihoods	prom	chr6	gencode::PNPLA1::ENSG00000180316.7	PNPLA1	1732	22	6.27654	3.50511	0.033883	0.689985
log-likelihoods	prom	chr18	gencode::RIT2::ENSG00000152214.8	RIT2	765	11	4.36558	2.51971	0.0338923	0.689985
log-likelihoods	prom	chr19	gencode::CTB-167G5.5::ENSG00000268864.1	CTB-167G5.5	852	8	4.12608	1.93889	0.033934	0.690099
log-likelihoods	prom	chr8	gencode::ASPH::ENSG00000198363.11	ASPH	2489	11	5.64415	1.94892	0.034021	0.691136
log-likelihoods	prom	chr11	gencode::TRPT1::ENSG00000149743.9	TRPT1	1275	7	2.65193	2.63958	0.0340914	0.691831
log-likelihoods	prom	chr20	gencode::FLRT3::ENSG00000125848.9	FLRT3	793	5	1.89362	2.64045	0.0341506	0.692096
log-likelihoods	prom	chr3	gencode::TRAT1::ENSG00000163519.9	TRAT1	835	8	3.98666	2.00669	0.0341874	0.692096
log-likelihoods	prom	chr11	gencode::OR5B12::ENSG00000172362.2	OR5B12	500	6	2.50582	2.39443	0.0342128	0.692096
log-likelihoods	prom	chr6	gencode::MDGA1::ENSG00000112139.10	MDGA1	931	8	4.37837	1.82717	0.0342784	0.692692
log-likelihoods	prom	chr15	gencode::UBL7::ENSG00000138629.11	UBL7	563	5	1.87752	2.66308	0.0344287	0.694515
log-likelihoods	prom	chr15	gencode::PLEKHO2::ENSG00000241839.5	PLEKHO2	858	6	2.85245	2.10345	0.0344412	0.694515
log-likelihoods	prom	chr15	gencode::PLCB2::ENSG00000137841.7	PLCB2	761	5	1.80615	2.76832	0.0344844	0.694657
log-likelihoods	prom	chr16	gencode::AQP8::ENSG00000103375.6	AQP8	1572	10	5.00959	1.99617	0.0347472	0.698558
log-likelihoods	prom	chr14	gencode::ADAM20::ENSG00000134007.3	ADAM20	779	8	2.90179	2.75692	0.034751	0.698558
log-likelihoods	prom	chr22	gencode::TTC28::ENSG00000100154.10	TTC28	754	6	3.23198	1.85645	0.0349085	0.700987
log-likelihoods	prom	chr1	gencode::OR13G1::ENSG00000197437.2	OR13G1	500	6	2.57076	2.33394	0.0350816	0.703725
log-likelihoods	prom	chr14	gencode::TBPL2::ENSG00000182521.5	TBPL2	777	7	2.28451	3.06411	0.0351438	0.704236
log-likelihoods	prom	chr5	gencode::PCDHB15::ENSG00000113248.3	PCDHB15	500	7	2.52327	2.77418	0.0351864	0.704354
log-likelihoods	prom	chr1	gencode::PKLR::ENSG00000143627.13	PKLR	1169	8	2.78682	2.87065	0.0352266	0.704421
log-likelihoods	prom	chr20	gencode::WFDC13::ENSG00000168634.4	WFDC13	802	6	2.49286	2.40688	0.0353421	0.705988
log-likelihoods	prom	chr6	gencode::NCR3::ENSG00000204475.5	NCR3	927	6	2.65717	2.25804	0.0353786	0.705988
log-likelihoods	prom	chr8	gencode::ZNF707::ENSG00000181135.11	ZNF707	1883	11	5.31955	2.06784	0.0354977	0.707626
log-likelihoods	prom	chr1	gencode::PHGDH::ENSG00000092621.7	PHGDH	1224	10	4.22814	2.36511	0.0358019	0.712297
log-likelihoods	prom	chr21	gencode::DNAJC28::ENSG00000177692.7	DNAJC28	590	5	2.01693	2.47901	0.0358445	0.712297
log-likelihoods	prom	chr1	gencode::OR2W3::ENSG00000238243.2	OR2W3	1336	13	6.96308	1.86699	0.0358607	0.712297
log-likelihoods	prom	chr12	gencode::C12orf56::ENSG00000185306.8	C12orf56	620	7	2.4371	2.87227	0.0359281	0.712297
log-likelihoods	prom	chr6	gencode::LPA::ENSG00000198670.7	LPA	1824	16	7.15659	2.2357	0.0359536	0.712297
log-likelihoods	prom	chr7	gencode::ABCB8::ENSG00000197150.8	ABCB8	739	6	2.78062	2.1578	0.0359551	0.712297
log-likelihoods	prom	chr9	gencode::DENND4C::ENSG00000137145.16	DENND4C	1422	9	4.22204	2.13167	0.036063	0.713696
log-likelihoods	prom	chr8	gencode::IDO1::ENSG00000131203.8	IDO1	1272	13	4.87915	2.6644	0.0361738	0.714809
log-likelihoods	prom	chr12	gencode::NABP2::ENSG00000139579.8	NABP2	500	4	1.57712	2.53626	0.0361966	0.714809
log-likelihoods	prom	chr11	gencode::MFRP::ENSG00000235718.3	MFRP	685	5	1.73796	2.87694	0.0363275	0.714809
log-likelihoods	prom	chr6	gencode::PIM1::ENSG00000137193.9	PIM1	543	6	2.29459	2.61485	0.0363546	0.714809
log-likelihoods	prom	chr8	gencode::PPAPDC1B::ENSG00000147535.12	PPAPDC1B	633	5	1.87782	2.66266	0.0364287	0.714809
log-likelihoods	prom	chr7	gencode::FAM200A::ENSG00000221909.2	FAM200A	717	6	2.25915	2.65587	0.0364429	0.714809
log-likelihoods	prom	chr12	gencode::RAD51AP1::ENSG00000111247.10	RAD51AP1	869	9	3.83824	2.34482	0.0365065	0.714809
log-likelihoods	prom	chr19	gencode::SMIM7::ENSG00000214046.4	SMIM7	894	6	2.94894	2.03463	0.0365166	0.714809
log-likelihoods	prom	chr5	gencode::PCDHGA9::ENSG00000261934.1	PCDHGA9	500	2	0.638412	3.13277	0.036523	0.714809
log-likelihoods	prom	chr19	gencode::LYPD5::ENSG00000159871.10	LYPD5	2430	13	6.39122	2.03404	0.0365499	0.714809
log-likelihoods	prom	chr10	gencode::CUBN::ENSG00000107611.10	CUBN	837	7	2.70511	2.58769	0.0365559	0.714809
log-likelihoods	prom	chr3	gencode::PRR23A::ENSG00000206260.2	PRR23A	500	5	2.3674	2.11202	0.0366231	0.714809
log-likelihoods	prom	chr4	gencode::GYPB::ENSG00000250361.2	GYPB	1769	19	8.76607	2.16745	0.0366554	0.714809
log-likelihoods	prom	chr20	gencode::CSNK2A1::ENSG00000101266.12	CSNK2A1	973	7	2.68138	2.6106	0.0367083	0.714809
log-likelihoods	prom	chr19	gencode::NLRP7::ENSG00000167634.8	NLRP7	2105	16	8.50536	1.88117	0.0367337	0.714809
log-likelihoods	prom	chr4	gencode::RPL9::ENSG00000163682.11	RPL9	338	3	0.861351	3.4829	0.0367778	0.714809
log-likelihoods	prom	chr18	gencode::AC018445.1::ENSG00000269679.1	AC018445.1	754	7	2.90498	2.40966	0.0367895	0.714809
log-likelihoods	prom	chr17	gencode::TSPAN10::ENSG00000182612.6	TSPAN10	872	5	2.30502	2.16917	0.0367908	0.714809
log-likelihoods	prom	chr2	gencode::ADI1::ENSG00000182551.9	ADI1	1129	4	1.85899	2.15171	0.0368474	0.715184
log-likelihoods	prom	chr4	gencode::MARCH1::ENSG00000145416.9	2001-03-01	2111	21	10.1085	2.07746	0.0369254	0.715972
log-likelihoods	prom	chr9	gencode::TOR1B::ENSG00000136816.11	TOR1B	739	7	2.55665	2.73796	0.0371333	0.718825
log-likelihoods	prom	chr7	gencode::ASB15::ENSG00000146809.8	ASB15	3193	23	13.1411	1.75024	0.0371476	0.718825
log-likelihoods	prom	chr11	gencode::PGR::ENSG00000082175.10	PGR	500	5	2.51609	1.98721	0.0373288	0.720546
log-likelihoods	prom	chr19	gencode::RPL18::ENSG00000063177.8	RPL18	820	4	1.37116	2.91724	0.0373781	0.720546
log-likelihoods	prom	chr1	gencode::BEST4::ENSG00000142959.4	BEST4	747	5	2.06848	2.41723	0.0373953	0.720546
log-likelihoods	prom	chr2	gencode::TTN::ENSG00000155657.19	TTN	788	7	3.05801	2.28907	0.0374319	0.720546
log-likelihoods	prom	chr12	gencode::SLCO1B1::ENSG00000134538.2	SLCO1B1	963	9	4.16192	2.16246	0.0374585	0.720546
log-likelihoods	prom	chr6	gencode::HLA-DQB2::ENSG00000232629.4	HLA-DQB2	881	9	3.63416	2.4765	0.0374622	0.720546
log-likelihoods	prom	chr5	gencode::MROH2B::ENSG00000171495.12	MROH2B	1355	13	6.05677	2.14636	0.0375948	0.722372
log-likelihoods	prom	chr15	gencode::GABARAPL3::ENSG00000238244.2	GABARAPL3	500	4	1.36137	2.93823	0.0377026	0.722661
log-likelihoods	prom	chr19	gencode::ZSCAN5C::ENSG00000204532.2	ZSCAN5C	1461	13	5.85066	2.22197	0.0377209	0.722661
log-likelihoods	prom	chr7	gencode::EIF3B::ENSG00000106263.13	EIF3B	500	6	1.82443	3.2887	0.0377477	0.722661
log-likelihoods	prom	chr1	gencode::FASLG::ENSG00000117560.6	FASLG	500	4	1.70838	2.34139	0.0377608	0.722661
log-likelihoods	prom	chr2	gencode::GPR148::ENSG00000173302.5	GPR148	500	5	1.7582	2.84381	0.0378308	0.72298
log-likelihoods	prom	chr12	gencode::LST3::ENSG00000257046.1	LST3	847	8	2.78959	2.86781	0.037853	0.72298
log-likelihoods	prom	chr14	gencode::ALDH6A1::ENSG00000119711.8	ALDH6A1	1298	7	2.84422	2.46113	0.0379022	0.7232
log-likelihoods	prom	chr11	gencode::OR52N1::ENSG00000181001.1	OR52N1	500	7	2.37971	2.94153	0.0379812	0.723985
log-likelihoods	prom	chr11	gencode::LTBP3::ENSG00000168056.10	LTBP3	2414	10	4.85135	2.06128	0.0380947	0.725104
log-likelihoods	prom	chr17	gencode::ENPP7::ENSG00000182156.5	ENPP7	524	4	1.67893	2.38246	0.0381156	0.725104
log-likelihoods	prom	chr17	gencode::SPAG7::ENSG00000091640.3	SPAG7	645	4	1.63094	2.45258	0.0381908	0.725815
log-likelihoods	prom	chr15	gencode::AC015660.1::ENSG00000269810.1	AC015660.1	868	7	2.82774	2.47548	0.038396	0.728991
log-likelihoods	prom	chr1	gencode::SPRR4::ENSG00000184148.3	SPRR4	969	10	4.51386	2.2154	0.0384589	0.729462
log-likelihoods	prom	chr19	gencode::DHPS::ENSG00000095059.11	DHPS	1175	6	3.02135	1.98586	0.0385813	0.731061
log-likelihoods	prom	chr6	gencode::PTCRA::ENSG00000171611.5	PTCRA	859	6	2.30273	2.6056	0.0386378	0.731408
log-likelihoods	prom	chr12	gencode::SNRNP35::ENSG00000184209.14	SNRNP35	2029	11	5.24333	2.09791	0.0387914	0.733589
log-likelihoods	prom	chr11	gencode::AL356215.1::ENSG00000269766.1	AL356215.1	966	5	2.6212	1.90753	0.0389087	0.734546
log-likelihoods	prom	chr11	gencode::MEN1::ENSG00000133895.10	MEN1	585	4	1.64615	2.42992	0.0389186	0.734546
log-likelihoods	prom	chr7	gencode::POR::ENSG00000127948.9	POR	2350	11	5.26874	2.08779	0.038967	0.734735
log-likelihoods	prom	chr13	gencode::GTF2F2::ENSG00000188342.7	GTF2F2	791	6	2.31052	2.59682	0.0390837	0.736009
log-likelihoods	prom	chr11	gencode::HYLS1::ENSG00000198331.6	HYLS1	1127	7	3.11656	2.24607	0.0391114	0.736009
log-likelihoods	prom	chr22	gencode::SNRPD3::ENSG00000100028.7	SNRPD3	619	5	1.62561	3.07576	0.0393146	0.738598
log-likelihoods	prom	chr7	gencode::FERD3L::ENSG00000146618.3	FERD3L	500	6	3.03829	1.97479	0.0393513	0.738598
log-likelihoods	prom	chr5	gencode::SEC24A::ENSG00000113615.8	SEC24A	52	1	0.128212	7.7996	0.0393647	0.738598
log-likelihoods	prom	chr1	gencode::AL645608.1::ENSG00000268179.1	AL645608.1	934	5	1.83271	2.7282	0.0394784	0.739298
log-likelihoods	prom	chr6	gencode::SGK1::ENSG00000118515.7	SGK1	2709	13	6.4565	2.01348	0.0394791	0.739298
log-likelihoods	prom	chr16	gencode::SEPT1::ENSG00000270466.1	2001-09-01	618	4	1.19282	3.3534	0.0395868	0.740037
log-likelihoods	prom	chr15	gencode::CASC4::ENSG00000166734.14	CASC4	500	5	2.85017	1.75428	0.0396217	0.740037
log-likelihoods	prom	chr1	gencode::SLC2A7::ENSG00000197241.3	SLC2A7	947	7	2.65254	2.63898	0.0396345	0.740037
log-likelihoods	prom	chr4	gencode::PTTG2::ENSG00000250254.1	PTTG2	500	3	1.16652	2.57175	0.0398771	0.742582
log-likelihoods	prom	chr19	gencode::ZNF14::ENSG00000105708.8	ZNF14	856	8	3.51188	2.27798	0.0399045	0.742582
log-likelihoods	prom	chr1	gencode::CFHR5::ENSG00000134389.8	CFHR5	831	9	4.26351	2.11094	0.0399407	0.742582
log-likelihoods	prom	chr22	gencode::FAM118A::ENSG00000100376.7	FAM118A	1571	9	4.41306	2.0394	0.0399507	0.742582
log-likelihoods	prom	chr19	gencode::ZNF837::ENSG00000152475.6	ZNF837	916	10	3.67037	2.72452	0.0399813	0.742582
log-likelihoods	prom	chr10	gencode::PARG::ENSG00000227345.4	PARG	787	3	1.0012	2.99642	0.0400039	0.742582
log-likelihoods	prom	chr2	gencode::STEAP3::ENSG00000115107.15	STEAP3	1836	12	6.79178	1.76684	0.0400513	0.742582
log-likelihoods	prom	chr10	gencode::CSTF2T::ENSG00000177613.7	CSTF2T	500	5	2.06259	2.42413	0.0400809	0.742582
log-likelihoods	prom	chr7	gencode::CNPY4::ENSG00000166997.3	CNPY4	462	2	0.580985	3.44243	0.040205	0.74406
log-likelihoods	prom	chr2	gencode::PLCL1::ENSG00000115896.11	PLCL1	944	10	4.70833	2.1239	0.0402383	0.74406
log-likelihoods	prom	chr19	gencode::PSG1::ENSG00000231924.5	PSG1	868	6	2.69194	2.22888	0.0405035	0.74734
log-likelihoods	prom	chr3	gencode::KAT2B::ENSG00000114166.7	KAT2B	500	5	2.21815	2.25413	0.0406292	0.74734
log-likelihoods	prom	chr22	gencode::GAL3ST1::ENSG00000128242.8	GAL3ST1	4501	23	13.5155	1.70174	0.0406294	0.74734
log-likelihoods	prom	chr3	gencode::CYP8B1::ENSG00000180432.4	CYP8B1	500	4	1.47254	2.71639	0.0406412	0.74734
log-likelihoods	prom	chr19	gencode::RPL18A::ENSG00000105640.8	RPL18A	1286	10	3.93654	2.5403	0.0406869	0.74734
log-likelihoods	prom	chr16	gencode::CTD-2144E22.5::ENSG00000179755.2	CTD-2144E22.5	500	5	2.12359	2.3545	0.0407197	0.74734
log-likelihoods	prom	chr4	gencode::USP17L25::ENSG00000230430.3	USP17L25	500	3	1.12921	2.65673	0.0407686	0.74734
log-likelihoods	prom	chr5	gencode::LYRM7::ENSG00000186687.11	LYRM7	948	8	3.09725	2.58294	0.040769	0.74734
log-likelihoods	prom	chr9	gencode::ALG2::ENSG00000119523.8	ALG2	1248	8	3.11583	2.56754	0.0407725	0.74734
log-likelihoods	prom	chr11	gencode::NDUFV1::ENSG00000167792.7	NDUFV1	775	5	2.12832	2.34928	0.0408448	0.74734
log-likelihoods	prom	chr6	gencode::OR2B3::ENSG00000204703.3	OR2B3	500	5	1.7027	2.93651	0.0408597	0.74734
log-likelihoods	prom	chr1	gencode::PARS2::ENSG00000162396.5	PARS2	944	8	3.31504	2.41325	0.0409643	0.74734
log-likelihoods	prom	chr1	gencode::AL626787.1::ENSG00000267884.1	AL626787.1	500	5	2.09375	2.38806	0.0410038	0.74734
log-likelihoods	prom	chr7	gencode::SVOPL::ENSG00000157703.11	SVOPL	3605	27	14.2461	1.89526	0.041016	0.74734
log-likelihoods	prom	chr5	gencode::PCSK1::ENSG00000175426.6	PCSK1	1500	10	4.65856	2.14659	0.041022	0.74734
log-likelihoods	prom	chr11	gencode::SHANK2::ENSG00000162105.12	SHANK2	2544	18	10.4262	1.72642	0.0410399	0.74734
log-likelihoods	prom	chr17	gencode::TRPV1::ENSG00000196689.6	TRPV1	2361	10	5.34408	1.87123	0.0412418	0.750303
log-likelihoods	prom	chr8	gencode::LOXL2::ENSG00000134013.11	LOXL2	711	6	2.4637	2.43536	0.0414891	0.754086
log-likelihoods	prom	chr12	gencode::PAN2::ENSG00000135473.10	PAN2	847	6	2.0357	2.94739	0.0415444	0.754376
log-likelihoods	prom	chr3	gencode::IGSF10::ENSG00000152580.8	IGSF10	804	7	2.54416	2.7514	0.0417123	0.755998
log-likelihoods	prom	chr3	gencode::FAM3D::ENSG00000198643.2	FAM3D	725	7	2.48507	2.81682	0.0417231	0.755998
log-likelihoods	prom	chr19	gencode::PRAM1::ENSG00000133246.7	PRAM1	951	7	2.76389	2.53266	0.0417522	0.755998
log-likelihoods	prom	chr14	gencode::TIMM9::ENSG00000100575.9	TIMM9	1718	8	4.01759	1.99124	0.0418228	0.756562
log-likelihoods	prom	chr12	gencode::CCER1::ENSG00000197651.3	CCER1	500	6	2.28614	2.62451	0.0422303	0.763212
log-likelihoods	prom	chr5	gencode::PCDHGA6::ENSG00000253731.1	PCDHGA6	500	3	0.665401	4.50856	0.0423093	0.763358
log-likelihoods	prom	chr15	gencode::FAM96A::ENSG00000166797.6	FAM96A	632	4	1.61665	2.47426	0.0423593	0.763358
log-likelihoods	prom	chr21	gencode::SYNJ1::ENSG00000159082.13	SYNJ1	1749	10	4.61007	2.16917	0.0423798	0.763358
log-likelihoods	prom	chr3	gencode::CCDC36::ENSG00000173421.12	CCDC36	2595	15	7.3262	2.04745	0.0424397	0.763358
log-likelihoods	prom	chr12	gencode::ANHX::ENSG00000227059.2	ANHX	500	8	3.48945	2.29262	0.0424628	0.763358
log-likelihoods	prom	chr17	gencode::CA10::ENSG00000154975.9	CA10	1280	16	8.17672	1.95678	0.0424774	0.763358
log-likelihoods	prom	chr1	gencode::HIST3H2A::ENSG00000181218.4	HIST3H2A	251	3	0.931559	3.22041	0.0425809	0.76403
log-likelihoods	prom	chr12	gencode::KLRG1::ENSG00000139187.5	KLRG1	901	7	2.76371	2.53283	0.0426334	0.76403
log-likelihoods	prom	chr12	gencode::RP11-552I14.1::ENSG00000257860.1	RP11-552I14.1	921	10	4.67942	2.13702	0.0426436	0.76403
log-likelihoods	prom	chr20	gencode::SEMG1::ENSG00000124233.10	SEMG1	740	7	2.26107	3.09589	0.0426743	0.76403
log-likelihoods	prom	chr17	gencode::SLC39A11::ENSG00000133195.7	SLC39A11	927	8	3.34161	2.39405	0.0427427	0.76454
log-likelihoods	prom	chr20	gencode::MYT1::ENSG00000196132.7	MYT1	1610	11	5.96157	1.84515	0.0429206	0.767005
log-likelihoods	prom	chr12	gencode::C12orf65::ENSG00000130921.3	C12orf65	1579	8	4.43149	1.80526	0.0430134	0.767013
log-likelihoods	prom	chr12	gencode::OVCH1::ENSG00000187950.4	OVCH1	934	9	3.88914	2.31414	0.0430259	0.767013
log-likelihoods	prom	chr12	gencode::TESPA1::ENSG00000135426.10	TESPA1	2601	19	10.8314	1.75417	0.0430411	0.767013
log-likelihoods	prom	chr12	gencode::NCKAP5L::ENSG00000167566.12	NCKAP5L	894	8	2.35449	3.39776	0.0431497	0.768234
log-likelihoods	prom	chr20	gencode::LRRN4::ENSG00000125872.7	LRRN4	778	6	2.60976	2.29906	0.0432422	0.768656
log-likelihoods	prom	chr19	gencode::ILVBL::ENSG00000105135.11	ILVBL	931	6	2.9523	2.03231	0.0432537	0.768656
log-likelihoods	prom	chr12	gencode::TPCN1::ENSG00000186815.8	TPCN1	2531	12	6.10849	1.96448	0.0433625	0.769209
log-likelihoods	prom	chr16	gencode::OTOA::ENSG00000155719.12	OTOA	2542	15	7.9319	1.8911	0.0433814	0.769209
log-likelihoods	prom	chr16	gencode::ZC3H7A::ENSG00000122299.7	ZC3H7A	2086	11	5.73679	1.91745	0.0435073	0.769209
log-likelihoods	prom	chr1	gencode::CD1B::ENSG00000158485.6	CD1B	796	9	4.29187	2.09699	0.0435168	0.769209
log-likelihoods	prom	chr18	gencode::PSMA8::ENSG00000154611.10	PSMA8	807	9	3.40313	2.64462	0.04352	0.769209
log-likelihoods	prom	chr11	gencode::BRMS1::ENSG00000174744.9	BRMS1	596	4	1.73506	2.3054	0.0435258	0.769209
log-likelihoods	prom	chr3	gencode::DRD3::ENSG00000151577.8	DRD3	1819	15	6.7735	2.21451	0.0435907	0.769646
log-likelihoods	prom	chr1	gencode::OR2M3::ENSG00000228198.1	OR2M3	500	7	2.60576	2.68635	0.0436336	0.769695
log-likelihoods	prom	chr16	gencode::GDPD3::ENSG00000102886.10	GDPD3	248	3	0.859935	3.48864	0.0438186	0.771648
log-likelihoods	prom	chr22	gencode::TCN2::ENSG00000185339.4	TCN2	775	4	1.8255	2.19117	0.0438248	0.771648
log-likelihoods	prom	chr19	gencode::PLIN4::ENSG00000167676.3	PLIN4	847	6	2.40425	2.49558	0.0440696	0.775244
log-likelihoods	prom	chr5	gencode::EXOC3::ENSG00000180104.11	EXOC3	1175	8	3.43893	2.3263	0.0443337	0.778471
log-likelihoods	prom	chr11	gencode::CABP4::ENSG00000175544.9	CABP4	740	6	1.97332	3.04056	0.0443688	0.778471
log-likelihoods	prom	chr11	gencode::TRIM51::ENSG00000124900.8	TRIM51	1190	12	6.07002	1.97693	0.0443749	0.778471
log-likelihoods	prom	chr1	gencode::AIM2::ENSG00000163568.9	AIM2	729	8	3.60933	2.21648	0.0445625	0.781046
log-likelihoods	prom	chr12	gencode::RECQL::ENSG00000004700.11	RECQL	458	5	1.98837	2.51462	0.0446221	0.781376
log-likelihoods	prom	chr6	gencode::HIST1H2BI::ENSG00000168242.3	HIST1H2BI	521	6	2.24453	2.67317	0.0446659	0.781428
log-likelihoods	prom	chr13	gencode::SLC10A2::ENSG00000125255.5	SLC10A2	500	6	2.42894	2.47021	0.0447627	0.781952
log-likelihoods	prom	chr17	gencode::C17orf97::ENSG00000187624.7	C17orf97	688	2	1.13975	1.75477	0.0447775	0.781952
log-likelihoods	prom	chr6	gencode::FILIP1::ENSG00000118407.10	FILIP1	1520	8	4.03393	1.98318	0.0448714	0.782879
log-likelihoods	prom	chr11	gencode::CD151::ENSG00000177697.13	CD151	1632	9	4.60137	1.95594	0.044947	0.783484
log-likelihoods	prom	chr7	gencode::PLEKHA8::ENSG00000106086.14	PLEKHA8	636	7	3.00853	2.32672	0.0450327	0.784266
log-likelihoods	prom	chr1	gencode::SYTL1::ENSG00000142765.13	SYTL1	1369	7	3.14012	2.22921	0.0451211	0.785091
log-likelihoods	prom	chr11	gencode::MED19::ENSG00000156603.10	MED19	652	5	1.87078	2.67268	0.0452772	0.787092
log-likelihoods	prom	chr5	gencode::CPEB4::ENSG00000113742.8	CPEB4	1392	8	3.43068	2.3319	0.0454946	0.789146
log-likelihoods	prom	chr10	gencode::LHPP::ENSG00000107902.9	LHPP	853	7	3.73313	1.8751	0.0455134	0.789146
log-likelihoods	prom	chr20	gencode::PTPN1::ENSG00000196396.5	PTPN1	790	7	2.47165	2.83211	0.0455189	0.789146
log-likelihoods	prom	chr16	gencode::C16orf72::ENSG00000182831.7	C16orf72	500	4	1.75462	2.2797	0.0456016	0.789865
log-likelihoods	prom	chr1	gencode::NVL::ENSG00000143748.13	NVL	930	6	2.46279	2.43626	0.0456882	0.790649
log-likelihoods	prom	chr16	gencode::NUTF2::ENSG00000102898.7	NUTF2	815	3	1.20997	2.4794	0.0457824	0.791564
log-likelihoods	prom	chr19	gencode::ZBTB45::ENSG00000119574.8	ZBTB45	766	7	2.46679	2.8377	0.0458792	0.792522
log-likelihoods	prom	chr11	gencode::FDX1::ENSG00000137714.2	FDX1	575	5	1.59546	3.13389	0.0459585	0.792935
log-likelihoods	prom	chr8	gencode::LACTB2::ENSG00000147592.4	LACTB2	663	6	2.87983	2.08346	0.0460536	0.792935
log-likelihoods	prom	chr1	gencode::OR2T8::ENSG00000177462.6	OR2T8	500	7	2.4144	2.89928	0.0461221	0.792935
log-likelihoods	prom	chr10	gencode::RSU1::ENSG00000148484.13	RSU1	587	6	3.40773	1.76071	0.0461429	0.792935
log-likelihoods	prom	chr3	gencode::ARGFX::ENSG00000186103.3	ARGFX	885	8	3.75757	2.12903	0.046161	0.792935
log-likelihoods	prom	chr6	gencode::SLC35B3::ENSG00000124786.8	SLC35B3	591	6	3.20958	1.86941	0.0461821	0.792935
log-likelihoods	prom	chr19	gencode::CLASRP::ENSG00000104859.10	CLASRP	910	6	2.5934	2.31356	0.0461978	0.792935
log-likelihoods	prom	chr19	gencode::KANK2::ENSG00000197256.6	KANK2	1887	10	5.51304	1.81388	0.0462342	0.792935
log-likelihoods	prom	chr19	gencode::ITPKC::ENSG00000086544.2	ITPKC	217	3	0.868043	3.45605	0.0464031	0.794051
log-likelihoods	prom	chr1	gencode::FCGR1B::ENSG00000198019.8	FCGR1B	942	5	1.48589	3.36499	0.0464045	0.794051
log-likelihoods	prom	chr19	gencode::SGTA::ENSG00000104969.5	SGTA	859	6	2.66374	2.25247	0.046431	0.794051
log-likelihoods	prom	chr5	gencode::AHRR::ENSG00000063438.12	AHRR	2511	12	6.74723	1.77851	0.0464651	0.794051
log-likelihoods	prom	chr15	gencode::LDHAL6B::ENSG00000171989.4	LDHAL6B	500	4	1.2653	3.16131	0.0465662	0.79507
log-likelihoods	prom	chr16	gencode::ZSCAN10::ENSG00000130182.3	ZSCAN10	1459	11	4.87974	2.25422	0.0467319	0.796523
log-likelihoods	prom	chr2	gencode::RGPD8::ENSG00000169629.7	RGPD8	1138	10	5.11542	1.95487	0.0467345	0.796523
log-likelihoods	prom	chr18	gencode::ARHGAP28::ENSG00000088756.8	ARHGAP28	3905	20	11.5864	1.72617	0.046795	0.796847
log-likelihoods	prom	chr1	gencode::HRNR::ENSG00000197915.5	HRNR	947	7	2.97009	2.35683	0.0468786	0.797025
log-likelihoods	prom	chr7	gencode::MYL7::ENSG00000106631.4	MYL7	684	5	1.99529	2.5059	0.0469029	0.797025
log-likelihoods	prom	chr6	gencode::PPARD::ENSG00000112033.9	PPARD	941	6	2.88803	2.07754	0.0469812	0.797025
log-likelihoods	prom	chr6	gencode::C6orf222::ENSG00000189325.6	C6orf222	824	8	2.76791	2.89027	0.0469908	0.797025
log-likelihoods	prom	chr11	gencode::OR8D2::ENSG00000197263.2	OR8D2	500	6	2.68509	2.23456	0.0470212	0.797025
log-likelihoods	prom	chr1	gencode::THEM4::ENSG00000159445.8	THEM4	720	5	2.05015	2.43885	0.0470613	0.797025
log-likelihoods	prom	chr8	gencode::SNTG1::ENSG00000147481.9	SNTG1	2627	24	15.7731	1.52158	0.0470968	0.797025
log-likelihoods	prom	chr6	gencode::GUCA1A::ENSG00000048545.9	GUCA1A	1350	9	3.57855	2.51498	0.0472866	0.799531
log-likelihoods	prom	chr5	gencode::ABLIM3::ENSG00000173210.15	ABLIM3	1436	9	4.67741	1.92414	0.0475087	0.802026
log-likelihoods	prom	chr7	gencode::ACTB::ENSG00000075624.9	ACTB	812	5	2.38799	2.09381	0.0475559	0.802026
log-likelihoods	prom	chr1	gencode::FNDC7::ENSG00000143107.4	FNDC7	1359	8	3.62802	2.20506	0.0475597	0.802026
log-likelihoods	prom	chr15	gencode::GDPGP1::ENSG00000183208.8	GDPGP1	1169	8	3.22387	2.48149	0.0476064	0.802108
log-likelihoods	prom	chr17	gencode::SCN4A::ENSG00000007314.7	SCN4A	594	6	2.27945	2.63221	0.0476803	0.802647
log-likelihoods	prom	chr22	gencode::UQCR10::ENSG00000184076.10	UQCR10	653	5	1.841	2.71591	0.0477715	0.803475
log-likelihoods	prom	chr1	gencode::CA6::ENSG00000131686.10	CA6	919	7	2.43819	2.87098	0.0478499	0.804088
log-likelihoods	prom	chr5	gencode::ARL14EPL::ENSG00000268223.2	ARL14EPL	902	8	4.22351	1.89416	0.0479424	0.804372
log-likelihoods	prom	chr1	gencode::AL355149.2::ENSG00000268674.1	AL355149.2	500	4	1.58309	2.52671	0.0479547	0.804372
log-likelihoods	prom	chr6	gencode::VNN2::ENSG00000112303.9	VNN2	1583	10	5.70177	1.75384	0.0479928	0.804372
log-likelihoods	prom	chr1	gencode::LRRC47::ENSG00000130764.5	LRRC47	500	5	1.99955	2.50056	0.0480702	0.804607
log-likelihoods	prom	chr19	gencode::NLRP8::ENSG00000179709.4	NLRP8	631	8	2.65938	3.00822	0.0480908	0.804607
log-likelihoods	prom	chr19	gencode::OSCAR::ENSG00000170909.9	OSCAR	1620	11	5.7818	1.90252	0.0481737	0.805292
log-likelihoods	prom	chr7	gencode::AGFG2::ENSG00000106351.8	AGFG2	689	6	2.35931	2.54312	0.0482863	0.806431
log-likelihoods	prom	chr9	gencode::RP11-295D22.1::ENSG00000260970.1	RP11-295D22.1	815	10	4.55758	2.19415	0.0483261	0.806431
log-likelihoods	prom	chr2	gencode::CEP68::ENSG00000011523.9	CEP68	934	8	3.38539	2.3631	0.0484103	0.806696
log-likelihoods	prom	chr20	gencode::CHMP4B::ENSG00000101421.3	CHMP4B	643	5	1.73839	2.87623	0.0484262	0.806696
log-likelihoods	prom	chr7	gencode::TAS2R16::ENSG00000128519.2	TAS2R16	500	7	2.65172	2.6398	0.0485275	0.807264
log-likelihoods	prom	chr12	gencode::KRT8::ENSG00000170421.7	KRT8	2006	7	3.20425	2.1846	0.0485445	0.807264
log-likelihoods	prom	chr20	gencode::TCEA2::ENSG00000171703.12	TCEA2	1410	10	4.37863	2.28382	0.0485925	0.807361
log-likelihoods	prom	chr4	gencode::PCGF3::ENSG00000185619.13	PCGF3	1764	11	6.08226	1.80854	0.048673	0.80753
log-likelihoods	prom	chr1	gencode::TRMT13::ENSG00000122435.5	TRMT13	689	7	2.3092	3.03135	0.0487769	0.80753
log-likelihoods	prom	chr5	gencode::AC091948.1::ENSG00000268126.1	AC091948.1	924	5	2.69063	1.8583	0.0488046	0.80753
log-likelihoods	prom	chr12	gencode::KRT2::ENSG00000172867.3	KRT2	500	5	1.60752	3.11038	0.048809	0.80753
log-likelihoods	prom	chr10	gencode::ANKRD30A::ENSG00000148513.13	ANKRD30A	846	12	6.85563	1.75039	0.0488135	0.80753
log-likelihoods	prom	chr3	gencode::IP6K2::ENSG00000068745.10	IP6K2	2378	12	5.79987	2.06901	0.04886	0.807602
log-likelihoods	prom	chr1	gencode::C1orf167::ENSG00000215910.3	C1orf167	1354	9	4.2604	2.11248	0.0489313	0.808083
log-likelihoods	prom	chr2	gencode::HJURP::ENSG00000123485.7	HJURP	815	8	3.09885	2.5816	0.0491341	0.810273
log-likelihoods	prom	chr19	gencode::CLEC17A::ENSG00000187912.7	CLEC17A	835	7	2.42863	2.88228	0.0492032	0.810273
log-likelihoods	prom	chr14	gencode::NGB::ENSG00000165553.4	NGB	534	5	1.83769	2.72081	0.0492317	0.810273
log-likelihoods	prom	chr3	gencode::P2RY13::ENSG00000181631.6	P2RY13	930	5	1.67642	2.98254	0.0493073	0.810273
log-likelihoods	prom	chr17	gencode::EPX::ENSG00000121053.5	EPX	714	6	2.2141	2.70991	0.0493481	0.810273
log-likelihoods	prom	chr10	gencode::AIFM2::ENSG00000042286.10	AIFM2	1599	9	3.72067	2.41892	0.0493996	0.810273
log-likelihoods	prom	chr8	gencode::PLAT::ENSG00000104368.13	PLAT	926	6	2.71968	2.20614	0.0494342	0.810273
log-likelihoods	prom	chr19	gencode::PSMD8::ENSG00000099341.7	PSMD8	545	4	1.53125	2.61225	0.0494346	0.810273
log-likelihoods	prom	chr11	gencode::OR4C13::ENSG00000258817.1	OR4C13	500	7	2.72979	2.5643	0.0494445	0.810273
log-likelihoods	prom	chr19	gencode::TMEM143::ENSG00000161558.6	TMEM143	717	6	2.29298	2.61669	0.0495008	0.810501
log-likelihoods	prom	chr17	gencode::RPL23::ENSG00000125691.8	RPL23	1050	6	2.72431	2.20239	0.0495776	0.810935
log-likelihoods	prom	chr18	gencode::AC091150.1::ENSG00000268960.1	AC091150.1	500	5	1.54228	3.24195	0.0496119	0.810935
log-likelihoods	prom	chr4	gencode::TMEM129::ENSG00000168936.6	TMEM129	393	5	1.73168	2.88738	0.0497092	0.811371
log-likelihoods	prom	chr2	gencode::LBX2::ENSG00000179528.11	LBX2	1294	6	2.72644	2.20068	0.0497233	0.811371
log-likelihoods	prom	chr10	gencode::C10orf128::ENSG00000204161.9	C10orf128	932	10	4.35656	2.29539	0.0499073	0.813022
log-likelihoods	prom	chr8	gencode::C8orf74::ENSG00000171060.6	C8orf74	921	8	3.36605	2.37668	0.0499094	0.813022
log-likelihoods	prom	chr19	gencode::CC2D1A::ENSG00000132024.13	CC2D1A	485	3	1.04068	2.88274	0.0499672	0.813273
log-likelihoods	prom	chr10	gencode::CASC10::ENSG00000204682.5	CASC10	500	4	1.62842	2.45637	0.0501925	0.815696
log-likelihoods	prom	chr2	gencode::MARS2::ENSG00000247626.3	MARS2	500	6	2.42	2.47934	0.0502013	0.815696
log-likelihoods	prom	chr7	gencode::CLEC5A::ENSG00000258227.2	CLEC5A	871	10	4.19389	2.38442	0.0504344	0.818289
log-likelihoods	prom	chr11	gencode::LSP1::ENSG00000130592.9	LSP1	2854	19	8.8802	2.13959	0.0504618	0.818289
log-likelihoods	prom	chr6	gencode::CLPS::ENSG00000137392.5	CLPS	891	6	2.54085	2.36141	0.050489	0.818289
log-likelihoods	prom	chr3	gencode::LMLN::ENSG00000185621.7	LMLN	615	5	2.2182	2.25408	0.0506306	0.819557
log-likelihoods	prom	chr2	gencode::AAMP::ENSG00000127837.5	AAMP	649	5	1.69226	2.95463	0.0506528	0.819557
log-likelihoods	prom	chr19	gencode::CEACAM6::ENSG00000086548.8	CEACAM6	716	6	2.51598	2.38476	0.0507626	0.820272
log-likelihoods	prom	chr1	gencode::CD55::ENSG00000196352.9	CD55	880	5	2.47366	2.0213	0.0507826	0.820272
log-likelihoods	prom	chr11	gencode::SLC22A25::ENSG00000196600.8	SLC22A25	1488	12	5.7276	2.09512	0.0509631	0.822494
log-likelihoods	prom	chr17	gencode::MBTD1::ENSG00000011258.11	MBTD1	1537	9	4.45339	2.02093	0.0510198	0.822715
log-likelihoods	prom	chr11	gencode::TRIM29::ENSG00000137699.12	TRIM29	2283	13	5.49779	2.36459	0.0511246	0.823712
log-likelihoods	prom	chr12	gencode::CLEC4D::ENSG00000166527.3	CLEC4D	777	9	2.67667	3.36239	0.0511883	0.824046
log-likelihoods	prom	chr21	gencode::ATP5O::ENSG00000241837.2	ATP5O	745	5	2.17308	2.30089	0.0514387	0.827381
log-likelihoods	prom	chr20	gencode::SLC12A5::ENSG00000124140.8	SLC12A5	1740	11	5.81005	1.89327	0.0514906	0.827521
log-likelihoods	prom	chr15	gencode::PPP1R14D::ENSG00000166143.5	PPP1R14D	675	5	1.92317	2.59987	0.0515768	0.828213
log-likelihoods	prom	chr19	gencode::P2RY11::ENSG00000244165.1	P2RY11	538	3	0.773752	3.87721	0.0517109	0.82967
log-likelihoods	prom	chr7	gencode::MACC1::ENSG00000183742.8	MACC1	1814	13	6.13961	2.1174	0.0517725	0.829672
log-likelihoods	prom	chr13	gencode::PCDH17::ENSG00000118946.7	PCDH17	500	6	3.16847	1.89366	0.051835	0.829672
log-likelihoods	prom	chr17	gencode::RP11-81K2.1::ENSG00000262039.1	RP11-81K2.1	802	6	2.5014	2.39866	0.051841	0.829672
log-likelihoods	prom	chr18	gencode::RP11-723G8.2::ENSG00000265352.1	RP11-723G8.2	906	8	3.68967	2.16822	0.0519525	0.829871
log-likelihoods	prom	chr19	gencode::ICAM3::ENSG00000076662.5	ICAM3	789	5	1.96713	2.54177	0.0519785	0.829871
log-likelihoods	prom	chr17	gencode::GEMIN4::ENSG00000179409.6	GEMIN4	1456	4	2.37096	1.68708	0.0519834	0.829871
log-likelihoods	prom	chr19	gencode::CALR::ENSG00000179218.9	CALR	834	7	2.98289	2.34671	0.0521164	0.830732
log-likelihoods	prom	chr8	gencode::GDAP1::ENSG00000104381.8	GDAP1	837	8	3.3737	2.37129	0.0521629	0.830732
log-likelihoods	prom	chr16	gencode::DEF8::ENSG00000140995.12	DEF8	986	7	3.25253	2.15217	0.0522215	0.830732
log-likelihoods	prom	chr19	gencode::FPR3::ENSG00000187474.4	FPR3	1675	15	5.90407	2.54062	0.0522397	0.830732
log-likelihoods	prom	chr6	gencode::EYS::ENSG00000188107.9	EYS	1663	16	8.0492	1.98777	0.0522591	0.830732
log-likelihoods	prom	chr11	gencode::ME3::ENSG00000151376.12	ME3	1520	8	4.06662	1.96724	0.052356	0.830732
log-likelihoods	prom	chr6	gencode::DEFB133::ENSG00000214643.2	DEFB133	938	10	5.12908	1.94967	0.0523766	0.830732
log-likelihoods	prom	chr11	gencode::LRRC4C::ENSG00000148948.3	LRRC4C	1343	14	7.55712	1.85256	0.0524108	0.830732
log-likelihoods	prom	chr17	gencode::KRT27::ENSG00000171446.6	KRT27	513	4	1.39604	2.86526	0.0524276	0.830732
log-likelihoods	prom	chr7	gencode::GNAT3::ENSG00000214415.3	GNAT3	786	7	2.36655	2.95789	0.052677	0.833995
log-likelihoods	prom	chr1	gencode::TSTD1::ENSG00000215845.6	TSTD1	727	5	2.25105	2.22118	0.0527522	0.834076
log-likelihoods	prom	chr4	gencode::USP17L19::ENSG00000248920.1	USP17L19	500	3	1.54529	1.94138	0.0527692	0.834076
log-likelihoods	prom	chr12	gencode::STYK1::ENSG00000060140.4	STYK1	671	5	2.57133	1.94452	0.0528516	0.834558
log-likelihoods	prom	chr1	gencode::CRB1::ENSG00000134376.10	CRB1	4311	27	15.6132	1.72931	0.0529198	0.834558
log-likelihoods	prom	chr2	gencode::AGFG1::ENSG00000173744.13	AGFG1	781	6	2.21877	2.7042	0.0529304	0.834558
log-likelihoods	prom	chr17	gencode::ATP6V0A1::ENSG00000033627.10	ATP6V0A1	938	6	2.44602	2.45296	0.0531389	0.837157
log-likelihoods	prom	chr2	gencode::LPIN1::ENSG00000134324.7	LPIN1	4073	22	10.9564	2.00795	0.0532879	0.837414
log-likelihoods	prom	chr12	gencode::CIT::ENSG00000122966.9	CIT	958	8	3.56216	2.24583	0.0532974	0.837414
log-likelihoods	prom	chr19	gencode::ATP8B3::ENSG00000130270.12	ATP8B3	679	6	2.42441	2.47483	0.0533094	0.837414
log-likelihoods	prom	chr1	gencode::SMG5::ENSG00000198952.7	SMG5	659	4	1.65876	2.41144	0.0533301	0.837414
log-likelihoods	prom	chr6	gencode::ZUFSP::ENSG00000153975.5	ZUFSP	769	6	2.89683	2.07123	0.0534752	0.838955
log-likelihoods	prom	chr17	gencode::TEX19::ENSG00000182459.4	TEX19	959	6	2.96169	2.02587	0.0535158	0.838955
log-likelihoods	prom	chr11	gencode::NUMA1::ENSG00000137497.13	NUMA1	728	3	0.93532	3.20746	0.0536278	0.839169
log-likelihoods	prom	chr6	gencode::HCRTR2::ENSG00000137252.5	HCRTR2	500	5	1.94307	2.57325	0.0536341	0.839169
log-likelihoods	prom	chr19	gencode::CDC37::ENSG00000105401.2	CDC37	842	6	2.49458	2.40522	0.0536917	0.839169
log-likelihoods	prom	chr20	gencode::MYH7B::ENSG00000078814.11	MYH7B	901	5	1.70957	2.92471	0.0537047	0.839169
log-likelihoods	prom	chr16	gencode::NPIPB11::ENSG00000254206.1	NPIPB11	799	6	2.48488	2.41461	0.0537644	0.839307
log-likelihoods	prom	chr15	gencode::SPATA8::ENSG00000185594.4	SPATA8	727	9	4.27952	2.10304	0.0538067	0.839307
log-likelihoods	prom	chr12	gencode::GLT8D2::ENSG00000120820.8	GLT8D2	2056	13	5.28165	2.46135	0.0538597	0.839307
log-likelihoods	prom	chr1	gencode::C1orf168::ENSG00000187889.8	C1orf168	908	8	3.84796	2.07902	0.0538888	0.839307
log-likelihoods	prom	chr12	gencode::CLEC1A::ENSG00000150048.6	CLEC1A	855	6	2.77443	2.16261	0.0539921	0.840233
log-likelihoods	prom	chr5	gencode::KCNMB1::ENSG00000145936.4	KCNMB1	622	5	2.09025	2.39205	0.0540555	0.840537
log-likelihoods	prom	chr7	gencode::ASZ1::ENSG00000154438.3	ASZ1	830	10	3.4026	2.93893	0.0541435	0.840975
log-likelihoods	prom	chr7	gencode::CPA1::ENSG00000091704.5	CPA1	1416	9	4.48039	2.00875	0.0541715	0.840975
log-likelihoods	prom	chr17	gencode::RND2::ENSG00000108830.7	RND2	789	5	2.44055	2.04872	0.0542693	0.841812
log-likelihoods	prom	chr15	gencode::KNSTRN::ENSG00000128944.9	KNSTRN	795	5	2.07591	2.40858	0.0543504	0.842387
log-likelihoods	prom	chr11	gencode::OR8J3::ENSG00000167822.1	OR8J3	500	6	2.69369	2.22743	0.0544052	0.842555
log-likelihoods	prom	chr14	gencode::TTC6::ENSG00000139865.12	TTC6	2263	17	8.80369	1.93101	0.0545286	0.843784
log-likelihoods	prom	chr3	gencode::RPL32::ENSG00000144713.8	RPL32	500	5	1.6723	2.9899	0.054635	0.844748
log-likelihoods	prom	chr7	gencode::TRPV6::ENSG00000165125.13	TRPV6	624	7	3.09899	2.2588	0.0547484	0.845733
log-likelihoods	prom	chr8	gencode::C8orf31::ENSG00000177335.6	C8orf31	690	5	3.07474	1.62615	0.0548331	0.845733
log-likelihoods	prom	chr11	gencode::CTNND1::ENSG00000198561.8	CTNND1	1441	11	4.96884	2.2138	0.0548844	0.845733
log-likelihoods	prom	chr7	gencode::WBSCR16::ENSG00000174374.9	WBSCR16	618	5	2.84263	1.75893	0.0549228	0.845733
log-likelihoods	prom	chr4	gencode::PET112::ENSG00000059691.7	PET112	819	6	2.98677	2.00886	0.0550595	0.845733
log-likelihoods	prom	chr1	gencode::OR2T33::ENSG00000177212.2	OR2T33	500	5	2.41356	2.07163	0.0550619	0.845733
log-likelihoods	prom	chr10	gencode::LIPN::ENSG00000204020.5	LIPN	890	5	2.59201	1.92901	0.0550742	0.845733
log-likelihoods	prom	chr1	gencode::C1orf170::ENSG00000187642.5	C1orf170	969	7	3.30569	2.11756	0.0550845	0.845733
log-likelihoods	prom	chr19	gencode::ELOF1::ENSG00000130165.6	ELOF1	1914	10	5.01467	1.99415	0.0551145	0.845733
log-likelihoods	prom	chr10	gencode::PCDH15::ENSG00000150275.13	PCDH15	1521	18	9.92205	1.81414	0.0551487	0.845733
log-likelihoods	prom	chr3	gencode::ANAPC13::ENSG00000129055.8	ANAPC13	548	4	0.992275	4.03114	0.0552671	0.845733
log-likelihoods	prom	chr14	gencode::OR5AU1::ENSG00000169327.3	OR5AU1	500	4	1.45429	2.75049	0.0553591	0.845733
log-likelihoods	prom	chr1	gencode::UBXN11::ENSG00000158062.16	UBXN11	1599	6	3.08142	1.94715	0.0553763	0.845733
log-likelihoods	prom	chr12	gencode::IL22::ENSG00000127318.6	IL22	838	8	3.74384	2.13685	0.0554053	0.845733
log-likelihoods	prom	chr17	gencode::AC003043.1::ENSG00000268413.1	AC003043.1	486	4	1.54259	2.59304	0.0554331	0.845733
log-likelihoods	prom	chr1	gencode::PEF1::ENSG00000162517.8	PEF1	965	6	2.68992	2.23055	0.0554421	0.845733
log-likelihoods	prom	chr6	gencode::HMGN4::ENSG00000182952.4	HMGN4	901	6	3.1434	1.90876	0.0554492	0.845733
log-likelihoods	prom	chr1	gencode::DNALI1::ENSG00000163879.9	DNALI1	928	7	2.38084	2.94014	0.0555529	0.846444
log-likelihoods	prom	chr16	gencode::ESRP2::ENSG00000103067.7	ESRP2	581	4	1.68186	2.37832	0.0556004	0.846444
log-likelihoods	prom	chr8	gencode::PENK::ENSG00000181195.6	PENK	976	11	5.93156	1.85449	0.0556284	0.846444
log-likelihoods	prom	chr2	gencode::MGC10955::ENSG00000217702.1	MGC10955	500	4	1.50564	2.65668	0.0556904	0.846715
log-likelihoods	prom	chr17	gencode::CCR7::ENSG00000126353.3	CCR7	1588	9	4.0378	2.22894	0.0558197	0.848007
log-likelihoods	prom	chr8	gencode::OPRK1::ENSG00000082556.6	OPRK1	1316	14	6.96672	2.00955	0.0559189	0.848708
log-likelihoods	prom	chr14	gencode::SIPA1L1::ENSG00000197555.5	SIPA1L1	2352	15	6.47027	2.31829	0.0559544	0.848708
log-likelihoods	prom	chr6	gencode::OR10C1::ENSG00000206474.6	OR10C1	500	5	2.24357	2.22859	0.0562944	0.851495
log-likelihoods	prom	chr12	gencode::HOXC4::ENSG00000273266.1	HOXC4	513	4	1.17587	3.40175	0.0563782	0.851495
log-likelihoods	prom	chr10	gencode::DKFZP667F0711::ENSG00000212743.1	DKFZP667F0711	500	5	1.81879	2.74908	0.0563893	0.851495
log-likelihoods	prom	chr7	gencode::MTRNR2L6::ENSG00000270672.1	MTRNR2L6	500	5	1.66564	3.00186	0.0564699	0.851495
log-likelihoods	prom	chr1	gencode::TMCO2::ENSG00000188800.5	TMCO2	668	4	1.72883	2.3137	0.0565092	0.851495
log-likelihoods	prom	chr7	gencode::PRSS58::ENSG00000258223.2	PRSS58	638	7	2.75173	2.54385	0.0565254	0.851495
log-likelihoods	prom	chr7	gencode::TSGA13::ENSG00000213265.4	TSGA13	949	9	2.91314	3.08945	0.0565481	0.851495
log-likelihoods	prom	chr19	gencode::ZNF574::ENSG00000105732.9	ZNF574	1890	14	7.70773	1.81636	0.0565628	0.851495
log-likelihoods	prom	chr10	gencode::CACNB2::ENSG00000165995.14	CACNB2	3469	21	12.303	1.7069	0.0565956	0.851495
log-likelihoods	prom	chr19	gencode::AC011500.1::ENSG00000213922.1	AC011500.1	679	5	2.06084	2.4262	0.0566537	0.851495
log-likelihoods	prom	chr22	gencode::MTMR3::ENSG00000100330.11	MTMR3	1760	9	4.5642	1.97187	0.0566696	0.851495
log-likelihoods	prom	chr12	gencode::RPL41::ENSG00000229117.4	RPL41	788	5	2.10812	2.37178	0.0567533	0.851495
log-likelihoods	prom	chr7	gencode::OR2AE1::ENSG00000244623.1	OR2AE1	500	5	1.66641	3.00046	0.0567642	0.851495
log-likelihoods	prom	chr17	gencode::AC102948.2::ENSG00000226364.1	AC102948.2	647	7	3.43151	2.03992	0.0567698	0.851495
log-likelihoods	prom	chr11	gencode::OR51I2::ENSG00000187918.3	OR51I2	500	7	2.63611	2.65542	0.056863	0.851495
log-likelihoods	prom	chr10	gencode::INA::ENSG00000148798.5	INA	500	5	1.81974	2.74765	0.0569404	0.851495
log-likelihoods	prom	chr2	gencode::NTSR2::ENSG00000169006.6	NTSR2	500	5	1.95446	2.55825	0.0569716	0.851495
log-likelihoods	prom	chr1	gencode::HORMAD1::ENSG00000143452.11	HORMAD1	925	6	2.61119	2.2978	0.0569811	0.851495
log-likelihoods	prom	chr3	gencode::CCR4::ENSG00000183813.6	CCR4	881	7	2.70651	2.58635	0.0570676	0.851495
log-likelihoods	prom	chr6	gencode::MRPS18B::ENSG00000204568.7	MRPS18B	878	8	3.40822	2.34726	0.0570816	0.851495
log-likelihoods	prom	chr7	gencode::DGKB::ENSG00000136267.9	DGKB	1963	19	10.1115	1.87906	0.0570905	0.851495
log-likelihoods	prom	chr17	gencode::GNGT2::ENSG00000167083.2	GNGT2	1313	6	2.79087	2.14986	0.0571981	0.851495
log-likelihoods	prom	chr2	gencode::WDFY1::ENSG00000085449.10	WDFY1	758	5	2.21476	2.25758	0.0572257	0.851495
log-likelihoods	prom	chr12	gencode::KLRD1::ENSG00000134539.12	KLRD1	1759	10	4.42828	2.25821	0.0572436	0.851495
log-likelihoods	prom	chr1	gencode::NLRP3::ENSG00000162711.12	NLRP3	1675	15	8.59522	1.74516	0.0572494	0.851495
log-likelihoods	prom	chr3	gencode::TRMT10C::ENSG00000174173.6	TRMT10C	856	9	3.1533	2.85415	0.057383	0.85252
log-likelihoods	prom	chr1	gencode::FKSG48::ENSG00000267885.1	FKSG48	625	4	2.23615	1.78879	0.0574354	0.85252
log-likelihoods	prom	chr8	gencode::VPS28::ENSG00000160948.9	VPS28	1628	8	4.30253	1.85937	0.0574517	0.85252
log-likelihoods	prom	chr1	gencode::PAPPA2::ENSG00000116183.6	PAPPA2	750	8	3.30013	2.42415	0.0575412	0.852716
log-likelihoods	prom	chr15	gencode::OR4F4::ENSG00000177693.3	OR4F4	500	5	1.77731	2.81324	0.057554	0.852716
log-likelihoods	prom	chr20	gencode::TGM3::ENSG00000125780.11	TGM3	928	8	3.27398	2.44351	0.0578465	0.856388
log-likelihoods	prom	chr13	gencode::MEDAG::ENSG00000102802.5	MEDAG	500	5	2.23151	2.24063	0.0579261	0.856408
log-likelihoods	prom	chr11	gencode::TOLLIP::ENSG00000078902.11	TOLLIP	1635	11	5.2688	2.08776	0.0579373	0.856408
log-likelihoods	prom	chr15	gencode::VPS33B::ENSG00000184056.10	VPS33B	638	5	2.09555	2.38601	0.0581545	0.858957
log-likelihoods	prom	chr6	gencode::PPP1R10::ENSG00000204569.5	PPP1R10	685	7	2.76514	2.53152	0.0583723	0.860945
log-likelihoods	prom	chr12	gencode::C12orf79::ENSG00000257242.2	C12orf79	341	2	0.723902	2.76281	0.0583791	0.860945
log-likelihoods	prom	chr6	gencode::DEFB110::ENSG00000203970.3	DEFB110	943	9	4.38752	2.05127	0.0584944	0.861983
log-likelihoods	prom	chr19	gencode::OR7D4::ENSG00000174667.2	OR7D4	500	5	1.91009	2.61768	0.0585745	0.86218
log-likelihoods	prom	chr14	gencode::RP11-293M10.1::ENSG00000258740.1	RP11-293M10.1	894	5	2.18689	2.28635	0.0585978	0.86218
log-likelihoods	prom	chr11	gencode::ARHGEF12::ENSG00000196914.4	ARHGEF12	1764	9	4.45545	2.02	0.058744	0.863668
log-likelihoods	prom	chr1	gencode::OR2G6::ENSG00000188558.4	OR2G6	500	5	2.34729	2.13012	0.0589431	0.865455
log-likelihoods	prom	chr5	gencode::ALDH7A1::ENSG00000164904.11	ALDH7A1	668	4	1.96287	2.03783	0.0590088	0.865455
log-likelihoods	prom	chr19	gencode::OR7G2::ENSG00000170923.2	OR7G2	500	4	1.7751	2.25339	0.0590101	0.865455
log-likelihoods	prom	chr6	gencode::OR2J3::ENSG00000204701.1	OR2J3	500	5	1.77944	2.80988	0.0590463	0.865455
log-likelihoods	prom	chr19	gencode::CILP2::ENSG00000160161.5	CILP2	849	6	2.6665	2.25014	0.0591569	0.866414
log-likelihoods	prom	chr10	gencode::KIN::ENSG00000151657.7	KIN	699	7	2.7286	2.56542	0.0592269	0.866777
log-likelihoods	prom	chr20	gencode::TM9SF4::ENSG00000101337.11	TM9SF4	694	5	1.93585	2.58285	0.059308	0.8673
log-likelihoods	prom	chr10	gencode::PRKG1::ENSG00000185532.10	PRKG1	2059	16	8.43184	1.89757	0.0595127	0.867755
log-likelihoods	prom	chr19	gencode::SNRPA::ENSG00000077312.4	SNRPA	355	4	1.37165	2.91619	0.059546	0.867755
log-likelihoods	prom	chr7	gencode::OR2F1::ENSG00000213215.1	OR2F1	500	4	1.90421	2.10061	0.0595611	0.867755
log-likelihoods	prom	chr3	gencode::GPD1L::ENSG00000152642.6	GPD1L	750	6	2.78149	2.15711	0.0595727	0.867755
log-likelihoods	prom	chr19	gencode::PSG8::ENSG00000124467.14	PSG8	1715	10	5.6235	1.77825	0.0596794	0.867755
log-likelihoods	prom	chr8	gencode::KCTD9::ENSG00000104756.11	KCTD9	729	8	3.41963	2.33944	0.0596803	0.867755
log-likelihoods	prom	chr1	gencode::PLEKHA6::ENSG00000143850.8	PLEKHA6	775	5	2.07638	2.40803	0.0596951	0.867755
log-likelihoods	prom	chr2	gencode::FAM228A::ENSG00000186453.8	FAM228A	815	7	3.83124	1.82708	0.0597511	0.867755
log-likelihoods	prom	chr20	gencode::SLCO4A1::ENSG00000101187.11	SLCO4A1	969	6	3.16347	1.89665	0.0597634	0.867755
log-likelihoods	prom	chr22	gencode::SNAP29::ENSG00000099940.7	SNAP29	388	3	1.2689	2.36425	0.059792	0.867755
log-likelihoods	prom	chr12	gencode::HOXC4::ENSG00000198353.6	HOXC4	527	4	1.19997	3.33341	0.0598542	0.868
log-likelihoods	prom	chr6	gencode::LY6G6C::ENSG00000204421.2	LY6G6C	946	7	2.42876	2.88213	0.0600047	0.868947
log-likelihoods	prom	chr5	gencode::PCDHB8::ENSG00000120322.2	PCDHB8	500	6	2.19897	2.72855	0.0600103	0.868947
log-likelihoods	prom	chr1	gencode::OCLM::ENSG00000262180.1	OCLM	500	4	1.27274	3.14281	0.0601553	0.870023
log-likelihoods	prom	chr1	gencode::PRCC::ENSG00000143294.10	PRCC	500	4	1.49303	2.67912	0.0601754	0.870023
log-likelihoods	prom	chr12	gencode::OLR1::ENSG00000173391.4	OLR1	1858	11	5.26715	2.08841	0.0602451	0.870373
log-likelihoods	prom	chr1	gencode::IPO13::ENSG00000117408.6	IPO13	1000	6	2.80016	2.14273	0.0603515	0.870617
log-likelihoods	prom	chr8	gencode::TNFRSF10B::ENSG00000120889.8	TNFRSF10B	727	5	2.4049	2.07909	0.0603528	0.870617
log-likelihoods	prom	chr17	gencode::EMC6::ENSG00000127774.6	EMC6	384	4	1.60109	2.4983	0.0605717	0.873116
log-likelihoods	prom	chr9	gencode::APTX::ENSG00000137074.14	APTX	2427	11	5.98504	1.83792	0.0606722	0.87371
log-likelihoods	prom	chr11	gencode::SLCO2B1::ENSG00000137491.10	SLCO2B1	1694	12	5.74603	2.0884	0.0607457	0.87371
log-likelihoods	prom	chr11	gencode::C11orf88::ENSG00000183644.9	C11orf88	772	6	2.85973	2.0981	0.0607542	0.87371
log-likelihoods	prom	chr17	gencode::USP36::ENSG00000055483.15	USP36	1290	9	4.01998	2.23882	0.0608553	0.87371
log-likelihoods	prom	chr9	gencode::IFNA8::ENSG00000120242.3	IFNA8	500	4	1.453	2.75292	0.0608945	0.87371
log-likelihoods	prom	chr16	gencode::CACNG3::ENSG00000006116.3	CACNG3	500	5	1.84273	2.71336	0.0609266	0.87371
log-likelihoods	prom	chr19	gencode::CEP89::ENSG00000121289.13	CEP89	711	6	2.54915	2.35373	0.0609461	0.87371
log-likelihoods	prom	chr1	gencode::SHCBP1L::ENSG00000157060.10	SHCBP1L	1450	9	4.7329	1.90158	0.0609777	0.87371
log-likelihoods	prom	chr18	gencode::CBLN2::ENSG00000141668.5	CBLN2	2154	23	14.8664	1.54711	0.0610827	0.874561
log-likelihoods	prom	chr3	gencode::CLDN18::ENSG00000066405.8	CLDN18	1196	9	4.56719	1.97058	0.0612741	0.875835
log-likelihoods	prom	chr5	gencode::FAM159B::ENSG00000145642.7	FAM159B	500	5	2.22346	2.24875	0.0613172	0.875835
log-likelihoods	prom	chr9	gencode::OR1L3::ENSG00000171481.2	OR1L3	500	5	1.8125	2.75862	0.0613408	0.875835
log-likelihoods	prom	chr19	gencode::CD3EAP::ENSG00000117877.6	CD3EAP	865	4	1.54732	2.58511	0.0613546	0.875835
log-likelihoods	prom	chr22	gencode::MCM5::ENSG00000100297.11	MCM5	747	6	2.54229	2.36008	0.0614285	0.876237
log-likelihoods	prom	chr1	gencode::THBS3::ENSG00000169231.9	THBS3	1518	7	3.39883	2.05953	0.0615213	0.876695
log-likelihoods	prom	chr9	gencode::SPATA31D1::ENSG00000214929.3	SPATA31D1	765	9	3.68687	2.44109	0.0615522	0.876695
log-likelihoods	prom	chr12	gencode::OVCH1-AS1::ENSG00000257599.1	OVCH1-AS1	500	4	1.96545	2.03516	0.061665	0.87681
log-likelihoods	prom	chr3	gencode::OR5H6::ENSG00000230301.3	OR5H6	500	6	2.45648	2.44252	0.0616671	0.87681
log-likelihoods	prom	chr12	gencode::NANOG::ENSG00000111704.6	NANOG	847	8	3.30916	2.41753	0.0617605	0.87681
log-likelihoods	prom	chr8	gencode::FDFT1::ENSG00000079459.8	FDFT1	2008	11	6.04101	1.82089	0.0617848	0.87681
log-likelihoods	prom	chr7	gencode::CTAGE15::ENSG00000271079.1	CTAGE15	500	4	1.4896	2.68528	0.0617891	0.87681
log-likelihoods	prom	chr15	gencode::CYP19A1::ENSG00000137869.9	CYP19A1	2558	15	8.86161	1.6927	0.061884	0.877507
log-likelihoods	prom	chr4	gencode::FRG1::ENSG00000109536.7	FRG1	714	11	6.83939	1.60833	0.06197	0.878076
log-likelihoods	prom	chr11	gencode::NUP98::ENSG00000110713.11	NUP98	773	4	1.58428	2.52481	0.0621143	0.879471
log-likelihoods	prom	chr9	gencode::FPGS::ENSG00000136877.10	FPGS	944	5	2.53596	1.97164	0.0621821	0.87978
log-likelihoods	prom	chr7	gencode::VOPP1::ENSG00000154978.8	VOPP1	6243	36	19.5451	1.84189	0.062468	0.882891
log-likelihoods	prom	chr17	gencode::CSH2::ENSG00000213218.5	CSH2	761	7	2.84926	2.45677	0.0624942	0.882891
log-likelihoods	prom	chr2	gencode::SF3B1::ENSG00000115524.11	SF3B1	942	6	2.89375	2.07344	0.062579	0.883039
log-likelihoods	prom	chr2	gencode::ABCB11::ENSG00000073734.8	ABCB11	900	8	3.27921	2.43962	0.0625968	0.883039
log-likelihoods	prom	chr20	gencode::ZNF831::ENSG00000124203.5	ZNF831	500	4	1.34104	2.98276	0.0626697	0.883416
log-likelihoods	prom	chr7	gencode::MGAM::ENSG00000257335.4	MGAM	946	11	5.05445	2.1763	0.0627434	0.883805
log-likelihoods	prom	chr12	gencode::RHOF::ENSG00000139725.3	RHOF	922	5	2.47017	2.02415	0.0628055	0.88403
log-likelihoods	prom	chr1	gencode::ATPIF1::ENSG00000130770.13	ATPIF1	586	5	1.89851	2.63365	0.0628678	0.884243
log-likelihoods	prom	chr4	gencode::NAA11::ENSG00000156269.4	NAA11	500	6	2.18469	2.74638	0.062913	0.884243
log-likelihoods	prom	chr19	gencode::HNRNPUL1::ENSG00000105323.12	HNRNPUL1	1988	10	5.12845	1.94991	0.0630217	0.885123
log-likelihoods	prom	chr21	gencode::S100B::ENSG00000160307.5	S100B	1302	8	3.72414	2.14815	0.063075	0.885221
log-likelihoods	prom	chr7	gencode::MOGAT3::ENSG00000106384.6	MOGAT3	726	5	2.23369	2.23845	0.0633191	0.887997
log-likelihoods	prom	chr7	gencode::CLCN1::ENSG00000188037.6	CLCN1	731	7	2.62256	2.66914	0.0634918	0.888888
log-likelihoods	prom	chr8	gencode::ZMAT4::ENSG00000165061.10	ZMAT4	855	9	4.18361	2.15125	0.0635578	0.888888
log-likelihoods	prom	chr4	gencode::PRIMPOL::ENSG00000164306.6	PRIMPOL	697	4	1.9948	2.00521	0.0636386	0.888888
log-likelihoods	prom	chr6	gencode::VNN1::ENSG00000112299.7	VNN1	774	6	2.88403	2.08042	0.0636946	0.888888
log-likelihoods	prom	chr5	gencode::SLC27A6::ENSG00000113396.8	SLC27A6	500	6	3.01166	1.99226	0.0637271	0.888888
log-likelihoods	prom	chr3	gencode::PRR23C::ENSG00000233701.2	PRR23C	500	5	1.95795	2.55369	0.0637925	0.888888
log-likelihoods	prom	chr5	gencode::CDC23::ENSG00000094880.6	CDC23	749	6	2.1682	2.76728	0.0638294	0.888888
log-likelihoods	prom	chr15	gencode::HERC1::ENSG00000103657.9	HERC1	936	7	3.70277	1.89048	0.0638417	0.888888
log-likelihoods	prom	chr3	gencode::ENTPD3::ENSG00000168032.4	ENTPD3	1500	12	6.29682	1.90572	0.0638484	0.888888
log-likelihoods	prom	chr1	gencode::TRIT1::ENSG00000043514.11	TRIT1	881	5	2.70988	1.8451	0.0638788	0.888888
log-likelihoods	prom	chr22	gencode::OSM::ENSG00000099985.3	OSM	1662	9	4.80282	1.8739	0.063893	0.888888
log-likelihoods	prom	chr10	gencode::NDST2::ENSG00000166507.12	NDST2	887	5	2.88787	1.73138	0.0639752	0.889386
log-likelihoods	prom	chr19	gencode::BABAM1::ENSG00000105393.11	BABAM1	972	5	2.50823	1.99344	0.0641164	0.88984
log-likelihoods	prom	chr21	gencode::KRTAP12-4::ENSG00000212933.1	KRTAP12-4	553	5	1.81586	2.75352	0.0641426	0.88984
log-likelihoods	prom	chr8	gencode::POLR2K::ENSG00000147669.6	POLR2K	911	6	3.09468	1.93881	0.0642254	0.88984
log-likelihoods	prom	chr1	gencode::SEPN1::ENSG00000162430.12	SEPN1	777	6	3.10816	1.9304	0.0643112	0.88984
log-likelihoods	prom	chr7	gencode::ELMO1::ENSG00000155849.11	ELMO1	3158	21	12.5749	1.66999	0.0643472	0.88984
log-likelihoods	prom	chr1	gencode::DPT::ENSG00000143196.4	DPT	603	4	1.91533	2.08841	0.0643611	0.88984
log-likelihoods	prom	chr17	gencode::CCL11::ENSG00000172156.3	CCL11	781	8	3.97111	2.01455	0.0644581	0.88984
log-likelihoods	prom	chr17	gencode::CBX8::ENSG00000141570.6	CBX8	811	6	3.13418	1.91438	0.0644821	0.88984
log-likelihoods	prom	chr12	gencode::COX14::ENSG00000178449.4	COX14	737	6	2.3708	2.53079	0.064483	0.88984
log-likelihoods	prom	chr19	gencode::DCAF15::ENSG00000132017.6	DCAF15	845	4	1.95223	2.04894	0.0644916	0.88984
log-likelihoods	prom	chr16	gencode::GALNS::ENSG00000141012.8	GALNS	778	6	2.31063	2.59669	0.0645188	0.88984
log-likelihoods	prom	chr3	gencode::OR5H15::ENSG00000233412.2	OR5H15	500	7	2.3899	2.929	0.0646757	0.891361
log-likelihoods	prom	chr9	gencode::OLFML2A::ENSG00000185585.15	OLFML2A	1705	9	4.49242	2.00338	0.0647567	0.891836
log-likelihoods	prom	chr19	gencode::CTD-2521M24.10::ENSG00000269035.1	CTD-2521M24.10	587	4	1.783	2.24341	0.0650178	0.894189
log-likelihoods	prom	chr19	gencode::HCST::ENSG00000126264.5	HCST	786	4	2.17285	1.8409	0.0651711	0.894189
log-likelihoods	prom	chr8	gencode::ADAM2::ENSG00000104755.10	ADAM2	919	9	4.18177	2.1522	0.0651858	0.894189
log-likelihoods	prom	chr11	gencode::TMEM45B::ENSG00000151715.3	TMEM45B	1643	10	5.34265	1.87173	0.065197	0.894189
log-likelihoods	prom	chr11	gencode::DDB2::ENSG00000134574.7	DDB2	676	5	2.15821	2.31674	0.0652037	0.894189
log-likelihoods	prom	chr6	gencode::SLC44A4::ENSG00000204385.6	SLC44A4	1826	10	5.27619	1.89531	0.0652076	0.894189
log-likelihoods	prom	chr12	gencode::XRCC6BP1::ENSG00000166896.3	XRCC6BP1	686	5	2.31758	2.15742	0.065626	0.899282
log-likelihoods	prom	chr10	gencode::C10orf68::ENSG00000150076.18	C10orf68	1697	10	5.67829	1.76109	0.0658534	0.90084
log-likelihoods	prom	chr10	gencode::GFRA1::ENSG00000151892.10	GFRA1	2417	20	13.8536	1.44366	0.0658813	0.90084
log-likelihoods	prom	chr18	gencode::C18orf32::ENSG00000177576.6	C18orf32	1244	7	3.67465	1.90495	0.0658886	0.90084
log-likelihoods	prom	chr1	gencode::RPTN::ENSG00000215853.3	RPTN	953	7	2.82293	2.4797	0.0660046	0.90084
log-likelihoods	prom	chr17	gencode::AC007461.1::ENSG00000267893.1	AC007461.1	500	5	1.99805	2.50244	0.0660776	0.90084
log-likelihoods	prom	chr20	gencode::FRG1B::ENSG00000149531.10	FRG1B	763	10	6.63588	1.50696	0.0661459	0.90084
log-likelihoods	prom	chr16	gencode::CTC-786C10.1::ENSG00000262601.1	CTC-786C10.1	500	4	1.73277	2.30844	0.0661628	0.90084
log-likelihoods	prom	chr5	gencode::TSSK1B::ENSG00000212122.3	TSSK1B	500	3	0.998782	3.00366	0.0662305	0.90084
log-likelihoods	prom	chr9	gencode::TLR4::ENSG00000136869.13	TLR4	804	7	3.44995	2.02902	0.0662803	0.90084
log-likelihoods	prom	chr1	gencode::C1orf143::ENSG00000228208.2	C1orf143	906	7	2.77145	2.52576	0.0663401	0.90084
log-likelihoods	prom	chr17	gencode::C17orf112::ENSG00000227011.1	C17orf112	796	9	4.45386	2.02072	0.0663778	0.90084
log-likelihoods	prom	chr3	gencode::DALRD3::ENSG00000178149.12	DALRD3	848	3	1.40268	2.13876	0.0663884	0.90084
log-likelihoods	prom	chr2	gencode::CRYGC::ENSG00000163254.4	CRYGC	704	9	2.40656	3.73977	0.0663934	0.90084
log-likelihoods	prom	chr12	gencode::SLC2A14::ENSG00000173262.7	SLC2A14	2678	17	8.71256	1.95121	0.0664028	0.90084
log-likelihoods	prom	chr19	gencode::FFAR2::ENSG00000126262.4	FFAR2	1416	9	4.8476	1.85659	0.066445	0.90084
log-likelihoods	prom	chr9	gencode::POMT1::ENSG00000130714.11	POMT1	632	5	2.36135	2.11743	0.0665775	0.901055
log-likelihoods	prom	chr19	gencode::FPR1::ENSG00000171051.4	FPR1	918	8	3.71267	2.15479	0.0665866	0.901055
log-likelihoods	prom	chr19	gencode::BCKDHA::ENSG00000248098.6	BCKDHA	1361	6	2.94659	2.03625	0.0666394	0.901055
log-likelihoods	prom	chr11	gencode::NUP160::ENSG00000030066.9	NUP160	2085	8	4.74177	1.68714	0.0667185	0.901055
log-likelihoods	prom	chr2	gencode::INO80B::ENSG00000115274.10	INO80B	728	5	2.33024	2.1457	0.0667259	0.901055
log-likelihoods	prom	chr18	gencode::SEH1L::ENSG00000085415.11	SEH1L	786	6	2.56544	2.33878	0.0667509	0.901055
log-likelihoods	prom	chr12	gencode::C12orf36::ENSG00000180861.5	C12orf36	1475	11	4.61023	2.386	0.0668784	0.901055
log-likelihoods	prom	chr8	gencode::ADRA1A::ENSG00000120907.13	ADRA1A	908	9	4.61292	1.95104	0.0669174	0.901055
log-likelihoods	prom	chr17	gencode::KRT12::ENSG00000187242.4	KRT12	500	4	1.48837	2.68751	0.0669277	0.901055
log-likelihoods	prom	chr19	gencode::KLK5::ENSG00000167754.8	KLK5	591	6	3.19054	1.88056	0.0669312	0.901055
log-likelihoods	prom	chr4	gencode::GABRA2::ENSG00000151834.11	GABRA2	2267	22	14.5435	1.5127	0.0670484	0.901599
log-likelihoods	prom	chr10	gencode::MBL2::ENSG00000165471.6	MBL2	746	9	3.48043	2.58589	0.0670658	0.901599
log-likelihoods	prom	chr2	gencode::SCN3A::ENSG00000153253.11	SCN3A	1670	10	6.00645	1.66488	0.0672388	0.902378
log-likelihoods	prom	chr1	gencode::HIST3H2BB::ENSG00000196890.3	HIST3H2BB	295	3	1.12144	2.67514	0.0672772	0.902378
log-likelihoods	prom	chr2	gencode::SLC3A1::ENSG00000138079.9	SLC3A1	2444	11	6.13389	1.79331	0.0673295	0.902378
log-likelihoods	prom	chr1	gencode::LCE3A::ENSG00000185962.1	LCE3A	730	9	4.0135	2.24243	0.0673797	0.902378
log-likelihoods	prom	chr5	gencode::CDH12::ENSG00000154162.9	CDH12	1517	22	8.65993	2.54044	0.0674168	0.902378
log-likelihoods	prom	chr19	gencode::ZNF225::ENSG00000256294.3	ZNF225	1545	11	5.8641	1.87582	0.067434	0.902378
log-likelihoods	prom	chr5	gencode::DDX46::ENSG00000145833.11	DDX46	846	6	2.57867	2.32678	0.0674627	0.902378
log-likelihoods	prom	chr11	gencode::NEU3::ENSG00000162139.5	NEU3	788	7	2.72084	2.57273	0.067537	0.902378
log-likelihoods	prom	chr10	gencode::C10orf12::ENSG00000155640.5	C10orf12	500	5	1.99509	2.50615	0.0675476	0.902378
log-likelihoods	prom	chr7	gencode::ZNF679::ENSG00000197123.5	ZNF679	1686	20	10.1738	1.96584	0.0676471	0.903077
log-likelihoods	prom	chr19	gencode::TNFSF9::ENSG00000125657.3	TNFSF9	693	6	2.62998	2.28139	0.0678029	0.904293
log-likelihoods	prom	chr11	gencode::DGKZ::ENSG00000149091.11	DGKZ	3000	12	6.84175	1.75394	0.0678726	0.904293
log-likelihoods	prom	chr12	gencode::KRT18::ENSG00000111057.6	KRT18	523	3	0.962373	3.1173	0.0678798	0.904293
log-likelihoods	prom	chr5	gencode::CANX::ENSG00000127022.10	CANX	1183	7	3.61616	1.93575	0.0680948	0.906527
log-likelihoods	prom	chr9	gencode::PPAPDC3::ENSG00000160539.4	PPAPDC3	500	5	1.5353	3.25669	0.0682785	0.907712
log-likelihoods	prom	chr1	gencode::DCAF6::ENSG00000143164.11	DCAF6	777	5	1.69546	2.94905	0.0682786	0.907712
log-likelihoods	prom	chr15	gencode::ATP8B4::ENSG00000104043.10	ATP8B4	1817	10	5.09005	1.96462	0.0683795	0.908423
log-likelihoods	prom	chr1	gencode::AADACL3::ENSG00000188984.7	AADACL3	796	6	2.3371	2.56729	0.0684424	0.908629
log-likelihoods	prom	chr8	gencode::STAR::ENSG00000147465.7	STAR	500	5	1.68146	2.97361	0.0685208	0.90904
log-likelihoods	prom	chr6	gencode::TREML1::ENSG00000161911.7	TREML1	651	6	2.72212	2.20416	0.0686668	0.910346
log-likelihoods	prom	chr3	gencode::CXCR6::ENSG00000172215.5	CXCR6	2062	8	4.20716	1.90152	0.068744	0.910367
log-likelihoods	prom	chr16	gencode::CTRL::ENSG00000141086.13	CTRL	500	4	1.29553	3.08755	0.0688124	0.910367
log-likelihoods	prom	chr12	gencode::PZP::ENSG00000126838.5	PZP	1633	9	4.85736	1.85286	0.0688363	0.910367
log-likelihoods	prom	chr4	gencode::USP17L24::ENSG00000232264.3	USP17L24	500	2	0.918209	2.17815	0.0688585	0.910367
log-likelihoods	prom	chr22	gencode::UFD1L::ENSG00000070010.14	UFD1L	793	5	2.46707	2.02669	0.0689444	0.910488
log-likelihoods	prom	chr1	gencode::MORN1::ENSG00000116151.9	MORN1	615	5	1.94738	2.56756	0.0689944	0.910488
log-likelihoods	prom	chr17	gencode::PRPF8::ENSG00000174231.12	PRPF8	632	5	2.09972	2.38127	0.0690468	0.910488
log-likelihoods	prom	chr17	gencode::TOB1::ENSG00000141232.4	TOB1	1421	8	3.94699	2.02686	0.0690577	0.910488
log-likelihoods	prom	chr16	gencode::RP11-105C20.2::ENSG00000260240.1	RP11-105C20.2	968	9	5.02485	1.7911	0.0691523	0.910836
log-likelihoods	prom	chr7	gencode::PRSS1::ENSG00000204983.8	PRSS1	952	10	4.94189	2.02352	0.0691811	0.910836
log-likelihoods	prom	chr19	gencode::HAUS5::ENSG00000249115.4	HAUS5	877	7	3.10534	2.25418	0.0692268	0.910836
log-likelihoods	prom	chr3	gencode::ATP13A3::ENSG00000133657.10	ATP13A3	1142	6	2.93727	2.04271	0.0693909	0.91184
log-likelihoods	prom	chr19	gencode::MLLT1::ENSG00000130382.7	MLLT1	822	7	3.91287	1.78897	0.0694828	0.91184
log-likelihoods	prom	chr7	gencode::TMEM196::ENSG00000173452.9	TMEM196	671	8	4.12348	1.94011	0.0695573	0.91184
log-likelihoods	prom	chr6	gencode::RARS2::ENSG00000146282.13	RARS2	842	6	2.69746	2.22432	0.0695791	0.91184
log-likelihoods	prom	chr2	gencode::PNKD::ENSG00000127838.9	PNKD	2267	9	4.22195	2.13171	0.0695856	0.91184
log-likelihoods	prom	chr12	gencode::C12orf71::ENSG00000214700.5	C12orf71	500	4	1.60199	2.4969	0.0696173	0.91184
log-likelihoods	prom	chr22	gencode::SLC25A17::ENSG00000100372.10	SLC25A17	1405	8	3.43532	2.32875	0.0696829	0.91184
log-likelihoods	prom	chr17	gencode::KRTAP3-1::ENSG00000212901.2	KRTAP3-1	500	4	1.65831	2.41209	0.0696839	0.91184
log-likelihoods	prom	chr3	gencode::EPHB3::ENSG00000182580.2	EPHB3	500	5	2.25402	2.21826	0.0697928	0.912642
log-likelihoods	prom	chr5	gencode::PROP1::ENSG00000175325.2	PROP1	580	6	2.3529	2.55005	0.0699406	0.913951
log-likelihoods	prom	chr10	gencode::C10orf113::ENSG00000204683.6	C10orf113	780	5	1.96419	2.54558	0.0700228	0.914401
log-likelihoods	prom	chr17	gencode::AC103809.2::ENSG00000268626.1	AC103809.2	598	5	2.11204	2.36738	0.0700955	0.914727
log-likelihoods	prom	chr11	gencode::AP001350.1::ENSG00000269570.1	AP001350.1	581	4	1.39358	2.87031	0.0702855	0.915387
log-likelihoods	prom	chr17	gencode::FAM101B::ENSG00000183688.4	FAM101B	894	2	1.08629	1.84112	0.0703966	0.915387
log-likelihoods	prom	chr19	gencode::TYROBP::ENSG00000011600.7	TYROBP	901	5	2.41872	2.06721	0.0704127	0.915387
log-likelihoods	prom	chr22	gencode::SRRD::ENSG00000100104.8	SRRD	634	4	2.00293	1.99707	0.0704237	0.915387
log-likelihoods	prom	chr3	gencode::KBTBD8::ENSG00000163376.7	KBTBD8	933	10	6.37281	1.56917	0.0704554	0.915387
log-likelihoods	prom	chr19	gencode::NXNL1::ENSG00000171773.2	NXNL1	587	4	1.85868	2.15207	0.0704661	0.915387
log-likelihoods	prom	chr1	gencode::GPR157::ENSG00000180758.10	GPR157	518	5	2.10203	2.37865	0.0704806	0.915387
log-likelihoods	prom	chr6	gencode::HSP90AB1::ENSG00000096384.15	HSP90AB1	1452	8	3.69796	2.16335	0.0706491	0.916426
log-likelihoods	prom	chr19	gencode::HNRNPL::ENSG00000104824.12	HNRNPL	1455	8	4.27634	1.87076	0.0706562	0.916426
log-likelihoods	prom	chr2	gencode::HADHB::ENSG00000138029.9	HADHB	770	5	1.91603	2.60957	0.0707312	0.916729
log-likelihoods	prom	chr17	gencode::CNTD1::ENSG00000176563.5	CNTD1	409	3	0.932106	3.21852	0.0707753	0.916729
log-likelihoods	prom	chr12	gencode::MYL2::ENSG00000111245.10	MYL2	949	9	3.8823	2.31821	0.0709368	0.917817
log-likelihoods	prom	chr1	gencode::NR1I3::ENSG00000143257.7	NR1I3	1793	8	4.0332	1.98354	0.0709551	0.917817
log-likelihoods	prom	chr9	gencode::RP11-216L13.17::ENSG00000272896.1	RP11-216L13.17	857	6	2.88332	2.08093	0.0710541	0.918478
log-likelihoods	prom	chr1	gencode::OR2L8::ENSG00000196936.3	OR2L8	500	6	2.49873	2.40122	0.0711125	0.918612
log-likelihoods	prom	chr19	gencode::ERF::ENSG00000105722.5	ERF	1239	8	3.64109	2.19714	0.071222	0.919407
log-likelihoods	prom	chr7	gencode::ASB4::ENSG00000005981.8	ASB4	740	6	2.23472	2.68491	0.0713288	0.920166
log-likelihoods	prom	chr5	gencode::IK::ENSG00000113141.11	IK	459	3	1.12958	2.65586	0.0714072	0.920557
log-likelihoods	prom	chr11	gencode::IFT46::ENSG00000118096.3	IFT46	870	5	2.11884	2.35978	0.0715094	0.921254
log-likelihoods	prom	chr5	gencode::POC5::ENSG00000152359.10	POC5	1744	11	5.45136	2.01785	0.0718435	0.924937
log-likelihoods	prom	chr1	gencode::INADL::ENSG00000132849.14	INADL	2742	14	7.6694	1.82544	0.0719595	0.925256
log-likelihoods	prom	chr6	gencode::HIST1H3J::ENSG00000197153.3	HIST1H3J	522	5	2.52705	1.97859	0.0719649	0.925256
log-likelihoods	prom	chr1	gencode::RRNAD1::ENSG00000143303.7	RRNAD1	755	4	1.6247	2.462	0.0721323	0.925593
log-likelihoods	prom	chr6	gencode::SNAP91::ENSG00000065609.10	SNAP91	714	8	4.14531	1.92989	0.072179	0.925593
log-likelihoods	prom	chr4	gencode::UGDH::ENSG00000109814.7	UGDH	1547	8	4.20373	1.90307	0.0721943	0.925593
log-likelihoods	prom	chr20	gencode::AAR2::ENSG00000131043.7	AAR2	700	6	1.96145	3.05896	0.0722323	0.925593
log-likelihoods	prom	chr20	gencode::MATN4::ENSG00000124159.11	MATN4	1814	11	5.45329	2.01713	0.0722767	0.925593
log-likelihoods	prom	chr15	gencode::AC105020.1::ENSG00000203392.2	AC105020.1	442	3	0.944786	3.17532	0.072281	0.925593
log-likelihoods	prom	chr5	gencode::CAMLG::ENSG00000164615.3	CAMLG	788	6	2.4971	2.40279	0.0724128	0.926098
log-likelihoods	prom	chr16	gencode::AHSP::ENSG00000169877.5	AHSP	816	7	3.25828	2.14838	0.0724672	0.926098
log-likelihoods	prom	chr2	gencode::M1AP::ENSG00000159374.13	M1AP	1862	11	6.25281	1.75921	0.072506	0.926098
log-likelihoods	prom	chr11	gencode::SLC22A6::ENSG00000197901.7	SLC22A6	629	4	1.69919	2.35406	0.0725138	0.926098
log-likelihoods	prom	chr3	gencode::TGM4::ENSG00000163810.7	TGM4	911	8	2.91389	2.74547	0.0725919	0.926477
log-likelihoods	prom	chr10	gencode::PPP2R2D::ENSG00000175470.14	PPP2R2D	830	6	2.73489	2.19387	0.0727293	0.926647
log-likelihoods	prom	chr16	gencode::PRSS36::ENSG00000178226.6	PRSS36	895	7	2.72882	2.56521	0.0727397	0.926647
log-likelihoods	prom	chr7	gencode::SKAP2::ENSG00000005020.8	SKAP2	1445	9	5.27108	1.70743	0.0727502	0.926647
log-likelihoods	prom	chr14	gencode::MRPL52::ENSG00000172590.14	MRPL52	864	6	2.38899	2.51152	0.0728983	0.927915
log-likelihoods	prom	chr7	gencode::HOXA1::ENSG00000105991.7	HOXA1	500	5	2.35717	2.12119	0.073035	0.928672
log-likelihoods	prom	chr12	gencode::SLC38A2::ENSG00000134294.9	SLC38A2	1436	7	3.51347	1.99233	0.0730547	0.928672
log-likelihoods	prom	chr6	gencode::ZKSCAN4::ENSG00000187626.7	ZKSCAN4	1029	11	4.31076	2.55175	0.0734662	0.933284
log-likelihoods	prom	chr6	gencode::BCLAF1::ENSG00000029363.11	BCLAF1	2559	11	5.85196	1.87971	0.073578	0.933546
log-likelihoods	prom	chr1	gencode::IL19::ENSG00000142224.11	IL19	1609	10	4.9322	2.02749	0.0736421	0.933546
log-likelihoods	prom	chr6	gencode::OOEP::ENSG00000203907.5	OOEP	1272	9	5.09921	1.76498	0.0736586	0.933546
log-likelihoods	prom	chr13	gencode::CYSLTR2::ENSG00000152207.3	CYSLTR2	500	4	1.5781	2.5347	0.0737477	0.933546
log-likelihoods	prom	chr11	gencode::AP002956.1::ENSG00000268192.1	AP002956.1	827	5	2.00603	2.49249	0.0737505	0.933546
log-likelihoods	prom	chr8	gencode::GSDMD::ENSG00000104518.6	GSDMD	1636	8	4.37256	1.82959	0.0738245	0.933546
log-likelihoods	prom	chr5	gencode::SPATA9::ENSG00000145757.11	SPATA9	742	6	2.23384	2.68595	0.073828	0.933546
log-likelihoods	prom	chr5	gencode::SQSTM1::ENSG00000161011.15	SQSTM1	1777	6	2.76198	2.17235	0.0739454	0.934414
log-likelihoods	prom	chr5	gencode::RAD17::ENSG00000152942.14	RAD17	1602	6	2.77999	2.15828	0.0741113	0.935894
log-likelihoods	prom	chr17	gencode::CTD-2370N5.3::ENSG00000265118.1	CTD-2370N5.3	306	2	0.472978	4.22853	0.0742252	0.936715
log-likelihoods	prom	chr4	gencode::PDLIM5::ENSG00000163110.10	PDLIM5	1647	7	4.06413	1.72238	0.0743118	0.93719
log-likelihoods	prom	chr14	gencode::NYNRIN::ENSG00000205978.5	NYNRIN	639	4	1.94083	2.06098	0.0745733	0.939234
log-likelihoods	prom	chr15	gencode::THSD4::ENSG00000187720.10	THSD4	2583	15	7.27496	2.06187	0.0746119	0.939234
log-likelihoods	prom	chr10	gencode::EPC1::ENSG00000120616.11	EPC1	1265	7	4.30314	1.62672	0.0746509	0.939234
log-likelihoods	prom	chr12	gencode::APOF::ENSG00000175336.8	APOF	904	5	2.49446	2.00444	0.07467	0.939234
log-likelihoods	prom	chr4	gencode::RBM47::ENSG00000163694.10	RBM47	2769	15	8.0727	1.85811	0.0748671	0.940278
log-likelihoods	prom	chr19	gencode::ZSCAN5D::ENSG00000267908.1	ZSCAN5D	864	7	3.09065	2.2649	0.0749809	0.940278
log-likelihoods	prom	chr1	gencode::CD1E::ENSG00000158488.11	CD1E	993	9	5.0939	1.76682	0.0749835	0.940278
log-likelihoods	prom	chr3	gencode::BDH1::ENSG00000161267.7	BDH1	1646	9	4.68286	1.9219	0.0749914	0.940278
log-likelihoods	prom	chr20	gencode::HM13::ENSG00000101294.12	HM13	722	5	2.31942	2.15571	0.0750388	0.940278
log-likelihoods	prom	chr12	gencode::AC139768.1::ENSG00000269339.1	AC139768.1	939	5	2.44214	2.04738	0.0750475	0.940278
log-likelihoods	prom	chr4	gencode::LIAS::ENSG00000121897.9	LIAS	458	3	1.1342	2.64503	0.0751886	0.940693
log-likelihoods	prom	chr2	gencode::AQP12B::ENSG00000185176.8	AQP12B	500	4	1.86667	2.14286	0.0752129	0.940693
log-likelihoods	prom	chr20	gencode::GDF5::ENSG00000125965.4	GDF5	1391	9	4.2594	2.11297	0.075228	0.940693
log-likelihoods	prom	chr3	gencode::LRCH3::ENSG00000186001.8	LRCH3	1622	8	4.30263	1.85933	0.075411	0.942366
log-likelihoods	prom	chr6	gencode::HDDC2::ENSG00000111906.13	HDDC2	909	6	3.2711	1.83424	0.0755577	0.943584
log-likelihoods	prom	chr18	gencode::ANKRD30B::ENSG00000180777.9	ANKRD30B	777	11	6.4566	1.70368	0.0756388	0.943983
log-likelihoods	prom	chr15	gencode::OR4M2::ENSG00000182974.2	OR4M2	500	6	2.65922	2.2563	0.0758019	0.944695
log-likelihoods	prom	chr1	gencode::OR2M7::ENSG00000177186.2	OR2M7	500	5	2.49767	2.00187	0.0758188	0.944695
log-likelihoods	prom	chr2	gencode::SLC30A3::ENSG00000115194.6	SLC30A3	1251	8	4.05279	1.97395	0.0759191	0.944695
log-likelihoods	prom	chr11	gencode::AP002884.3::ENSG00000272790.1	AP002884.3	828	5	2.15846	2.31647	0.0759211	0.944695
log-likelihoods	prom	chr5	gencode::PPP2R2B::ENSG00000156475.14	PPP2R2B	2998	20	9.36504	2.1356	0.0759425	0.944695
log-likelihoods	prom	chr10	gencode::PRAP1::ENSG00000165828.9	PRAP1	912	6	2.96309	2.02492	0.076034	0.945219
log-likelihoods	prom	chr3	gencode::COL8A1::ENSG00000144810.11	COL8A1	943	6	3.22794	1.85877	0.0762171	0.946541
log-likelihoods	prom	chr8	gencode::ADAM18::ENSG00000168619.11	ADAM18	943	11	5.42826	2.02643	0.0762391	0.946541
log-likelihoods	prom	chr11	gencode::NUDT22::ENSG00000149761.4	NUDT22	414	3	0.986587	3.04079	0.07645	0.948544
log-likelihoods	prom	chr3	gencode::TRPC1::ENSG00000144935.10	TRPC1	500	4	1.96999	2.03047	0.0766905	0.94934
log-likelihoods	prom	chr16	gencode::TRAPPC2L::ENSG00000167515.6	TRAPPC2L	1082	7	3.12081	2.24301	0.0767681	0.94934
log-likelihoods	prom	chr2	gencode::EPT1::ENSG00000138018.13	EPT1	500	3	1.30648	2.29625	0.07683	0.94934
log-likelihoods	prom	chr10	gencode::ARMC4::ENSG00000169126.11	ARMC4	3017	19	11.3495	1.67409	0.0768324	0.94934
log-likelihoods	prom	chr19	gencode::MYO1F::ENSG00000142347.12	MYO1F	727	5	1.88866	2.64737	0.0768464	0.94934
log-likelihoods	prom	chr16	gencode::KAT8::ENSG00000103510.15	KAT8	1448	9	4.64299	1.9384	0.0768535	0.94934
log-likelihoods	prom	chr17	gencode::PHF12::ENSG00000109118.9	PHF12	585	4	1.68188	2.37828	0.076878	0.94934
log-likelihoods	prom	chr3	gencode::BCL6::ENSG00000113916.13	BCL6	2155	13	5.7636	2.25553	0.0769121	0.94934
log-likelihoods	prom	chr19	gencode::ZNF791::ENSG00000173875.9	ZNF791	627	5	2.11952	2.35903	0.0769648	0.94934
log-likelihoods	prom	chr16	gencode::PAM16::ENSG00000217930.3	PAM16	3655	14	8.29853	1.68705	0.0770097	0.94934
log-likelihoods	prom	chr10	gencode::KLF6::ENSG00000067082.10	KLF6	717	8	3.84568	2.08026	0.0772127	0.950807
log-likelihoods	prom	chr21	gencode::AL050302.1::ENSG00000256715.1	AL050302.1	983	11	6.09107	1.80592	0.0773014	0.950807
log-likelihoods	prom	chr22	gencode::MYO18B::ENSG00000133454.11	MYO18B	938	9	4.29322	2.09633	0.0773244	0.950807
log-likelihoods	prom	chr9	gencode::ALAD::ENSG00000148218.11	ALAD	900	5	2.39926	2.08398	0.0773462	0.950807
log-likelihoods	prom	chr20	gencode::ACOT8::ENSG00000101473.12	ACOT8	489	3	1.20402	2.49165	0.0774033	0.950807
log-likelihoods	prom	chr5	gencode::DMGDH::ENSG00000132837.10	DMGDH	787	6	2.97395	2.01752	0.0774265	0.950807
log-likelihoods	prom	chr9	gencode::TMEM141::ENSG00000244187.3	TMEM141	857	6	2.96574	2.0231	0.0775771	0.952047
log-likelihoods	prom	chr7	gencode::GIMAP7::ENSG00000179144.4	GIMAP7	882	7	2.84563	2.45992	0.0776503	0.952335
log-likelihoods	prom	chr11	gencode::OR8D4::ENSG00000181518.2	OR8D4	500	5	2.1098	2.3699	0.0777529	0.952983
log-likelihoods	prom	chr3	gencode::LRRIQ4::ENSG00000188306.6	LRRIQ4	500	5	2.17203	2.30199	0.0778068	0.953034
log-likelihoods	prom	chr20	gencode::EDN3::ENSG00000124205.11	EDN3	836	6	3.04084	1.97314	0.0779334	0.953974
log-likelihoods	prom	chr16	gencode::MSLN::ENSG00000102854.10	MSLN	912	5	2.59763	1.92483	0.078107	0.955259
log-likelihoods	prom	chr10	gencode::AGAP6::ENSG00000204149.5	AGAP6	703	5	2.32275	2.15262	0.0781834	0.955259
log-likelihoods	prom	chr9	gencode::CENPP::ENSG00000188312.9	CENPP	1246	4	1.43551	2.78646	0.0782216	0.955259
log-likelihoods	prom	chr6	gencode::FAM162B::ENSG00000183807.6	FAM162B	645	6	2.84862	2.10628	0.0782378	0.955259
log-likelihoods	prom	chr11	gencode::MS4A4A::ENSG00000110079.12	MS4A4A	1787	13	6.99619	1.85815	0.0784595	0.957356
log-likelihoods	prom	chr17	gencode::KIAA0753::ENSG00000198920.5	KIAA0753	2241	7	3.46348	2.02109	0.0785502	0.957852
log-likelihoods	prom	chr16	gencode::PDPR::ENSG00000090857.9	PDPR	1736	10	6.23643	1.60348	0.0786432	0.958376
log-likelihoods	prom	chr1	gencode::RGS5::ENSG00000143248.8	RGS5	1841	10	5.57822	1.79269	0.0788296	0.959319
log-likelihoods	prom	chr1	gencode::GBP7::ENSG00000213512.1	GBP7	878	7	3.49799	2.00115	0.0788432	0.959319
log-likelihoods	prom	chr20	gencode::RP5-850E9.3::ENSG00000270299.1	RP5-850E9.3	287	4	1.25788	3.17994	0.0788708	0.959319
log-likelihoods	prom	chr16	gencode::CYB5B::ENSG00000103018.12	CYB5B	820	5	2.16716	2.30716	0.0790025	0.959799
log-likelihoods	prom	chr2	gencode::IL1RN::ENSG00000136689.14	IL1RN	2598	14	8.28308	1.69019	0.0790104	0.959799
log-likelihoods	prom	chr11	gencode::OR5M11::ENSG00000255223.2	OR5M11	500	5	2.61488	1.91214	0.0791102	0.959815
log-likelihoods	prom	chr3	gencode::PLOD2::ENSG00000152952.7	PLOD2	1294	7	3.6205	1.93344	0.079112	0.959815
log-likelihoods	prom	chr8	gencode::NOV::ENSG00000136999.4	NOV	623	6	2.76625	2.169	0.0791879	0.959902
log-likelihoods	prom	chr20	gencode::AVP::ENSG00000101200.5	AVP	828	6	2.73089	2.19708	0.0792193	0.959902
log-likelihoods	prom	chr15	gencode::GABPB1::ENSG00000104064.12	GABPB1	858	4	1.70296	2.34884	0.0793311	0.960648
log-likelihoods	prom	chr1	gencode::LAMC2::ENSG00000058085.10	LAMC2	854	5	2.6741	1.86979	0.0794189	0.960993
log-likelihoods	prom	chr1	gencode::OR2M4::ENSG00000171180.1	OR2M4	500	7	2.59713	2.69529	0.079478	0.960993
log-likelihoods	prom	chr22	gencode::MKL1::ENSG00000196588.10	MKL1	1590	7	3.82944	1.82794	0.0795186	0.960993
log-likelihoods	prom	chr11	gencode::OR8H2::ENSG00000181767.1	OR8H2	500	8	2.7327	2.92751	0.0795602	0.960993
log-likelihoods	prom	chr1	gencode::SPRR1A::ENSG00000169474.3	SPRR1A	1432	13	6.12239	2.12335	0.0797458	0.962158
log-likelihoods	prom	chr21	gencode::ITSN1::ENSG00000205726.9	ITSN1	1717	10	4.61159	2.16845	0.0797571	0.962158
log-likelihoods	prom	chr11	gencode::OR51G1::ENSG00000176879.2	OR51G1	500	8	2.9529	2.7092	0.0799369	0.963426
log-likelihoods	prom	chr1	gencode::RAP1A::ENSG00000116473.10	RAP1A	1713	9	4.91953	1.82944	0.0799628	0.963426
log-likelihoods	prom	chr1	gencode::ZNF684::ENSG00000117010.11	ZNF684	873	14	3.18807	4.39137	0.0800632	0.96403
log-likelihoods	prom	chr19	gencode::AC006132.1::ENSG00000267757.1	AC006132.1	613	4	1.4656	2.72926	0.0802839	0.966079
log-likelihoods	prom	chr17	gencode::OR1A1::ENSG00000172146.1	OR1A1	500	6	2.05192	2.92409	0.0804573	0.967558
log-likelihoods	prom	chr1	gencode::CATSPER4::ENSG00000188782.3	CATSPER4	718	5	2.16702	2.30731	0.0810531	0.974112
log-likelihoods	prom	chr19	gencode::SBK2::ENSG00000187550.4	SBK2	1498	9	6.06331	1.48434	0.0811905	0.975069
log-likelihoods	prom	chr17	gencode::DHX40::ENSG00000108406.5	DHX40	826	6	3.03328	1.97805	0.0812346	0.975069
log-likelihoods	prom	chr17	gencode::CANT1::ENSG00000171302.12	CANT1	931	5	2.753	1.8162	0.0813325	0.975162
log-likelihoods	prom	chr2	gencode::PLEK::ENSG00000115956.9	PLEK	777	6	2.69941	2.22271	0.0813441	0.975162
log-likelihoods	prom	chr6	gencode::MYCT1::ENSG00000120279.6	MYCT1	796	7	2.86355	2.44452	0.0816764	0.978031
log-likelihoods	prom	chr1	gencode::RPE65::ENSG00000116745.6	RPE65	933	8	3.36715	2.37589	0.0816855	0.978031
log-likelihoods	prom	chr16	gencode::CENPN::ENSG00000166451.9	CENPN	964	4	2.03362	1.96694	0.0817471	0.978157
log-likelihoods	prom	chr1	gencode::C1orf64::ENSG00000183888.4	C1orf64	848	6	2.43829	2.46074	0.0819562	0.980047
log-likelihoods	prom	chr7	gencode::XRCC2::ENSG00000196584.2	XRCC2	873	8	3.46948	2.30582	0.0820481	0.9804
log-likelihoods	prom	chr17	gencode::DNAH17-AS1::ENSG00000268470.1	DNAH17-AS1	500	3	0.960736	3.1226	0.0820881	0.9804
log-likelihoods	prom	chr11	gencode::FAM118B::ENSG00000197798.4	FAM118B	796	5	1.81786	2.75049	0.0823486	0.982362
log-likelihoods	prom	chr20	gencode::SYNDIG1::ENSG00000101463.5	SYNDIG1	500	7	3.34536	2.09245	0.082355	0.982362
log-likelihoods	prom	chr11	gencode::AGBL2::ENSG00000165923.11	AGBL2	1217	8	3.66559	2.18246	0.0824245	0.98258
log-likelihoods	prom	chr16	gencode::DDX19A::ENSG00000168872.11	DDX19A	1845	7	4.44091	1.57625	0.0826099	0.983763
log-likelihoods	prom	chr6	gencode::UNC93A::ENSG00000112494.5	UNC93A	885	9	3.9222	2.29463	0.0826264	0.983763
log-likelihoods	prom	chr3	gencode::FAM188B2::ENSG00000214237.5	FAM188B2	881	7	3.61457	1.93661	0.083153	0.988308
log-likelihoods	prom	chr19	gencode::CYP2F1::ENSG00000197446.4	CYP2F1	937	7	3.48	2.01149	0.0831667	0.988308
log-likelihoods	prom	chr8	gencode::OC90::ENSG00000258417.2	OC90	1705	15	10.3002	1.45629	0.0832416	0.988308
log-likelihoods	prom	chr22	gencode::GUCD1::ENSG00000138867.12	GUCD1	905	5	2.29673	2.17701	0.0832499	0.988308
log-likelihoods	prom	chr5	gencode::SLC23A1::ENSG00000170482.12	SLC23A1	923	5	2.11511	2.36394	0.0832661	0.988308
log-likelihoods	prom	chr16	gencode::ABCC11::ENSG00000121270.11	ABCC11	2503	15	8.04437	1.86466	0.0834196	0.988828
log-likelihoods	prom	chr20	gencode::DEFB115::ENSG00000215547.1	DEFB115	904	9	4.03248	2.23188	0.0834697	0.988828
log-likelihoods	prom	chr12	gencode::TRAFD1::ENSG00000135148.7	TRAFD1	500	3	1.34738	2.22654	0.0834914	0.988828
log-likelihoods	prom	chr17	gencode::RP11-676J12.7::ENSG00000262003.1	RP11-676J12.7	697	3	1.31465	2.28198	0.0835848	0.988828
log-likelihoods	prom	chr10	gencode::ADAM12::ENSG00000148848.10	ADAM12	600	6	3.03461	1.97719	0.083657	0.988828
log-likelihoods	prom	chr16	gencode::IGSF6::ENSG00000140749.7	IGSF6	869	5	1.73702	2.87849	0.0837475	0.988828
log-likelihoods	prom	chr12	gencode::AC073610.5::ENSG00000255863.1	AC073610.5	756	3	1.44424	2.07722	0.0837498	0.988828
log-likelihoods	prom	chr13	gencode::DLEU1::ENSG00000176124.7	DLEU1	611	3	1.26484	2.37184	0.0837758	0.988828
log-likelihoods	prom	chr2	gencode::CFLAR::ENSG00000003402.15	CFLAR	3205	11	7.54245	1.45841	0.0838023	0.988828
log-likelihoods	prom	chr16	gencode::TPSB2::ENSG00000197253.9	TPSB2	855	6	3.01987	1.98684	0.0838742	0.988828
log-likelihoods	prom	chr7	gencode::PURB::ENSG00000146676.5	PURB	500	5	2.27213	2.20058	0.0840845	0.988828
log-likelihoods	prom	chr1	gencode::LACTBL1::ENSG00000215906.4	LACTBL1	949	5	2.49987	2.0001	0.0841572	0.988828
log-likelihoods	prom	chr19	gencode::LAIR2::ENSG00000167618.5	LAIR2	952	8	4.33236	1.84657	0.0841579	0.988828
log-likelihoods	prom	chr4	gencode::USP17L10::ENSG00000231396.1	USP17L10	500	4	2.25977	1.77009	0.0841629	0.988828
log-likelihoods	prom	chr13	gencode::DNAJC15::ENSG00000120675.4	DNAJC15	500	3	1.46223	2.05166	0.0842144	0.988828
log-likelihoods	prom	chr16	gencode::VAC14::ENSG00000103043.10	VAC14	1133	6	2.91797	2.05622	0.0842172	0.988828
log-likelihoods	prom	chr3	gencode::TMEM30C::ENSG00000235156.3	TMEM30C	806	5	2.60108	1.92228	0.0842484	0.988828
log-likelihoods	prom	chr7	gencode::TAS2R38::ENSG00000257138.1	TAS2R38	500	6	2.90981	2.06199	0.0843233	0.988828
log-likelihoods	prom	chr15	gencode::AC016251.1::ENSG00000205148.1	AC016251.1	619	6	2.48933	2.41029	0.084368	0.988828
log-likelihoods	prom	chr16	gencode::MRPL28::ENSG00000086504.11	MRPL28	913	5	2.53523	1.97221	0.0844027	0.988828
log-likelihoods	prom	chr11	gencode::OR52L1::ENSG00000183313.4	OR52L1	500	6	2.62835	2.2828	0.0845012	0.988828
log-likelihoods	prom	chr20	gencode::PCED1A::ENSG00000132635.12	PCED1A	560	3	1.10717	2.70962	0.0845236	0.988828
log-likelihoods	prom	chr7	gencode::TMEM213::ENSG00000214128.6	TMEM213	815	5	2.27229	2.20042	0.0845339	0.988828
log-likelihoods	prom	chr12	gencode::SVOP::ENSG00000166111.5	SVOP	912	4	1.4295	2.79818	0.0845881	0.988828
log-likelihoods	prom	chr4	gencode::QRFPR::ENSG00000186867.6	QRFPR	626	7	4.02054	1.74106	0.0847705	0.988828
log-likelihoods	prom	chr17	gencode::TUSC5::ENSG00000184811.3	TUSC5	500	4	1.55087	2.5792	0.0847729	0.988828
log-likelihoods	prom	chr8	gencode::FOXH1::ENSG00000160973.7	FOXH1	500	4	1.33192	3.00318	0.0847922	0.988828
log-likelihoods	prom	chr5	gencode::MED10::ENSG00000133398.3	MED10	765	7	4.22561	1.65656	0.0849023	0.988828
log-likelihoods	prom	chr20	gencode::TPD52L2::ENSG00000101150.13	TPD52L2	907	6	2.79819	2.14424	0.0849548	0.988828
log-likelihoods	prom	chr4	gencode::C4orf50::ENSG00000181215.8	C4orf50	905	10	5.07656	1.96984	0.0851337	0.988828
log-likelihoods	prom	chr17	gencode::DHX8::ENSG00000067596.6	DHX8	778	4	2.206	1.81323	0.0852648	0.988828
log-likelihoods	prom	chr14	gencode::KIAA0125::ENSG00000226777.3	KIAA0125	921	8	3.98629	2.00688	0.0852694	0.988828
log-likelihoods	prom	chr3	gencode::MYH15::ENSG00000144821.5	MYH15	938	9	4.10147	2.19434	0.0852839	0.988828
log-likelihoods	prom	chr2	gencode::AC079612.1::ENSG00000196758.3	AC079612.1	500	5	2.19071	2.28237	0.0853565	0.988828
log-likelihoods	prom	chr14	gencode::LTB4R::ENSG00000213903.4	LTB4R	677	3	0.963666	3.11311	0.0854554	0.988828
log-likelihoods	prom	chr17	gencode::KRTAP1-3::ENSG00000221880.2	KRTAP1-3	500	3	1.46984	2.04104	0.0854681	0.988828
log-likelihoods	prom	chr1	gencode::F5::ENSG00000198734.6	F5	745	5	2.4653	2.02815	0.0854809	0.988828
log-likelihoods	prom	chr15	gencode::SLC28A1::ENSG00000156222.7	SLC28A1	928	7	3.08235	2.27099	0.0856567	0.988828
log-likelihoods	prom	chr18	gencode::SERPINB13::ENSG00000197641.7	SERPINB13	913	6	2.2201	2.70258	0.0857035	0.988828
log-likelihoods	prom	chr3	gencode::RNF168::ENSG00000163961.4	RNF168	500	4	1.61745	2.47304	0.0857053	0.988828
log-likelihoods	prom	chr6	gencode::DDX43::ENSG00000080007.6	DDX43	517	4	1.67122	2.39346	0.0857092	0.988828
log-likelihoods	prom	chr9	gencode::LCN9::ENSG00000148386.5	LCN9	902	7	3.97411	1.7614	0.0857284	0.988828
log-likelihoods	prom	chr19	gencode::AC006486.9::ENSG00000268643.1	AC006486.9	815	5	2.49669	2.00265	0.0857446	0.988828
log-likelihoods	prom	chr15	gencode::CIB1::ENSG00000185043.6	CIB1	652	6	2.11468	2.83731	0.0857553	0.988828
log-likelihoods	prom	chr4	gencode::CXCL13::ENSG00000156234.7	CXCL13	962	8	3.8891	2.05703	0.0858159	0.988828
log-likelihoods	prom	chr1	gencode::TLR5::ENSG00000187554.7	TLR5	1603	8	3.87928	2.06224	0.0858594	0.988828
log-likelihoods	prom	chr2	gencode::NFU1::ENSG00000169599.8	NFU1	1752	7	4.02464	1.73928	0.0858631	0.988828
log-likelihoods	prom	chr2	gencode::AC018867.2::ENSG00000268846.1	AC018867.2	862	5	1.86185	2.68549	0.0859493	0.988828
log-likelihoods	prom	chr3	gencode::GLYCTK::ENSG00000168237.13	GLYCTK	2156	12	5.71209	2.10081	0.0859735	0.988828
log-likelihoods	prom	chr20	gencode::BPIFB2::ENSG00000078898.6	BPIFB2	837	7	3.09451	2.26207	0.0859954	0.988828
log-likelihoods	prom	chr19	gencode::NDUFB7::ENSG00000099795.2	NDUFB7	824	6	2.65912	2.25638	0.0860566	0.988828
log-likelihoods	prom	chr19	gencode::ZNF99::ENSG00000213973.4	ZNF99	1836	21	13.408	1.56623	0.0861501	0.988828
log-likelihoods	prom	chr19	gencode::A1BG::ENSG00000121410.7	A1BG	662	3	1.20699	2.48553	0.0861698	0.988828
log-likelihoods	prom	chr5	gencode::FTMT::ENSG00000181867.1	FTMT	500	7	3.64762	1.91906	0.0861921	0.988828
log-likelihoods	prom	chr14	gencode::BRMS1L::ENSG00000100916.9	BRMS1L	780	5	3.0397	1.6449	0.0862048	0.988828
log-likelihoods	prom	chr14	gencode::OR11H6::ENSG00000176219.2	OR11H6	500	6	2.06548	2.90489	0.0862393	0.988828
log-likelihoods	prom	chr8	gencode::INTS9::ENSG00000104299.10	INTS9	576	4	1.67651	2.38591	0.0862521	0.988828
log-likelihoods	prom	chr11	gencode::RP11-113D6.6::ENSG00000255470.1	RP11-113D6.6	500	5	1.89973	2.63196	0.08647	0.98914
log-likelihoods	prom	chr8	gencode::C8orf4::ENSG00000176907.3	C8orf4	500	4	1.47353	2.71457	0.0864706	0.98914
log-likelihoods	prom	chr6	gencode::BCKDHB::ENSG00000083123.10	BCKDHB	774	7	3.93687	1.77806	0.0865698	0.98914
log-likelihoods	prom	chr16	gencode::DPEP1::ENSG00000015413.5	DPEP1	2486	13	7.62237	1.70551	0.0865871	0.98914
log-likelihoods	prom	chr10	gencode::CYP2C19::ENSG00000165841.5	CYP2C19	748	8	2.95915	2.70348	0.0866053	0.98914
log-likelihoods	prom	chr3	gencode::HRH1::ENSG00000196639.6	HRH1	2522	14	7.01609	1.99541	0.0866397	0.98914
log-likelihoods	prom	chr7	gencode::ZC3HC1::ENSG00000091732.11	ZC3HC1	844	6	2.49352	2.40623	0.0866628	0.98914
log-likelihoods	prom	chr2	gencode::GPR45::ENSG00000135973.1	GPR45	500	4	1.89377	2.11219	0.0867825	0.98914
log-likelihoods	prom	chr4	gencode::SPOCK3::ENSG00000196104.6	SPOCK3	1137	13	7.55856	1.71991	0.086803	0.98914
log-likelihoods	prom	chr1	gencode::C8B::ENSG00000021852.8	C8B	839	8	3.52371	2.27033	0.0868082	0.98914
log-likelihoods	prom	chr19	gencode::CBLC::ENSG00000142273.6	CBLC	582	4	1.71843	2.3277	0.0868473	0.98914
log-likelihoods	prom	chr1	gencode::OR10J3::ENSG00000196266.4	OR10J3	500	5	2.23684	2.2353	0.0869607	0.989843
log-likelihoods	prom	chr9	gencode::ZFP37::ENSG00000136866.9	ZFP37	866	3	1.66738	1.79923	0.0871669	0.991602
log-likelihoods	prom	chr9	gencode::INSL4::ENSG00000120211.4	INSL4	697	6	2.7701	2.16599	0.0873207	0.991868
log-likelihoods	prom	chr21	gencode::PRED58::ENSG00000267857.1	PRED58	851	4	1.67084	2.394	0.087371	0.991868
log-likelihoods	prom	chr3	gencode::RP11-433C9.2::ENSG00000224153.2	RP11-433C9.2	942	6	2.85582	2.10097	0.0873957	0.991868
log-likelihoods	prom	chr1	gencode::C1orf54::ENSG00000118292.4	C1orf54	1027	6	2.48659	2.41295	0.0873974	0.991868
log-likelihoods	prom	chr7	gencode::ZP3::ENSG00000188372.10	ZP3	1809	8	3.84203	2.08223	0.0875824	0.993379
log-likelihoods	prom	chr2	gencode::TSPYL6::ENSG00000178021.9	TSPYL6	500	5	1.54773	3.23053	0.0876417	0.993463
log-likelihoods	prom	chr17	gencode::VPS53::ENSG00000141252.15	VPS53	911	3	1.39994	2.14295	0.0877427	0.993861
log-likelihoods	prom	chr19	gencode::ZNF208::ENSG00000160321.10	ZNF208	870	11	5.92949	1.85513	0.0877806	0.993861
log-likelihoods	prom	chr22	gencode::GGTLC2::ENSG00000100121.8	GGTLC2	728	4	3.08077	1.29838	0.0878621	0.994196
log-likelihoods	prom	chr7	gencode::ZFAND2A::ENSG00000178381.7	ZFAND2A	783	5	3.13913	1.5928	0.0881293	0.995743
log-likelihoods	prom	chr17	gencode::TOP2A::ENSG00000131747.10	TOP2A	818	6	2.65899	2.25649	0.0881865	0.995743
log-likelihoods	prom	chr17	gencode::CCDC47::ENSG00000108588.9	CCDC47	426	3	1.19125	2.51836	0.0881873	0.995743
log-likelihoods	prom	chr11	gencode::FZD4::ENSG00000174804.3	FZD4	500	3	1.81126	1.6563	0.0882349	0.995743
log-likelihoods	prom	chr1	gencode::RER1::ENSG00000157916.14	RER1	1177	6	2.75739	2.17597	0.0882856	0.995743
log-likelihoods	prom	chr17	gencode::KRTAP9-1::ENSG00000240542.2	KRTAP9-1	1481	11	5.69554	1.93134	0.0883106	0.995743
log-likelihoods	prom	chr7	gencode::LAMB1::ENSG00000091136.9	LAMB1	1322	9	4.8111	1.87067	0.088425	0.995788
log-likelihoods	prom	chr9	gencode::CCDC171::ENSG00000164989.11	CCDC171	825	7	4.03868	1.73324	0.0884669	0.995788
log-likelihoods	prom	chr11	gencode::PDZD3::ENSG00000172367.11	PDZD3	635	4	1.75819	2.27507	0.0884706	0.995788
log-likelihoods	prom	chr19	gencode::PTGIR::ENSG00000160013.4	PTGIR	913	5	2.90153	1.72323	0.0885429	0.996016
log-likelihoods	prom	chr19	gencode::OR2Z1::ENSG00000181733.2	OR2Z1	500	4	1.88686	2.11992	0.0888755	0.999061
log-likelihoods	prom	chr6	gencode::BTN3A3::ENSG00000111801.11	BTN3A3	837	5	2.08917	2.39329	0.0889503	0.999061
log-likelihoods	prom	chr5	gencode::GABRG2::ENSG00000113327.10	GABRG2	929	11	5.68672	1.93433	0.0890153	0.999061
log-likelihoods	prom	chr9	gencode::OR1J4::ENSG00000239590.1	OR1J4	500	6	2.15886	2.77925	0.0890485	0.999061
log-likelihoods	prom	chr7	gencode::SLC13A4::ENSG00000164707.11	SLC13A4	500	4	1.6651	2.40226	0.0892285	0.999061
log-likelihoods	prom	chr1	gencode::IPP::ENSG00000197429.6	IPP	945	5	2.48511	2.01198	0.0892301	0.999061
log-likelihoods	prom	chr8	gencode::FABP4::ENSG00000170323.4	FABP4	829	7	3.02782	2.31189	0.0892398	0.999061
log-likelihoods	prom	chr9	gencode::CIZ1::ENSG00000148337.15	CIZ1	2367	9	4.49785	2.00096	0.0893077	0.999061
log-likelihoods	prom	chr19	gencode::GRIK5::ENSG00000105737.5	GRIK5	1523	11	5.41256	2.03231	0.0893742	0.999061
log-likelihoods	prom	chr1	gencode::NBPF14::ENSG00000122497.13	NBPF14	910	3	1.53009	1.96067	0.0894671	0.999061
log-likelihoods	prom	chr12	gencode::UNC119B::ENSG00000175970.7	UNC119B	714	5	2.1159	2.36306	0.089469	0.999061
log-likelihoods	prom	chr8	gencode::GML::ENSG00000104499.2	GML	930	7	3.78039	1.85166	0.089476	0.999061
log-likelihoods	prom	chr2	gencode::SP9::ENSG00000217236.1	SP9	830	6	3.14005	1.9108	0.0894915	0.999061
log-likelihoods	prom	chr2	gencode::COL6A3::ENSG00000163359.11	COL6A3	1677	9	4.72635	1.90422	0.0895478	0.999107
log-likelihoods	prom	chr5	gencode::CD14::ENSG00000170458.9	CD14	500	4	1.62437	2.46249	0.089725	0.999573
log-likelihoods	prom	chr19	gencode::AP1M1::ENSG00000072958.4	AP1M1	854	4	2.22234	1.7999	0.0897586	0.999573
log-likelihoods	prom	chr14	gencode::LGMN::ENSG00000100600.10	LGMN	874	6	3.22615	1.8598	0.089774	0.999573
log-likelihoods	prom	chr8	gencode::ADAMDEC1::ENSG00000134028.10	ADAMDEC1	875	7	3.04446	2.29926	0.0898621	0.999573
log-likelihoods	prom	chr9	gencode::RP11-508N12.4::ENSG00000242631.2	RP11-508N12.4	743	5	2.31784	2.15718	0.0899784	0.999573
log-likelihoods	prom	chr6	gencode::PSMG4::ENSG00000180822.7	PSMG4	1427	4	2.01811	1.98205	0.0900016	0.999573
log-likelihoods	prom	chr10	gencode::DUSP13::ENSG00000079393.16	DUSP13	2159	11	6.30171	1.74556	0.0900814	0.999573
log-likelihoods	prom	chr21	gencode::KRTAP19-2::ENSG00000186965.3	KRTAP19-2	606	7	3.27622	2.13661	0.0901457	0.999573
log-likelihoods	prom	chr5	gencode::UBE2D2::ENSG00000131508.11	UBE2D2	1646	9	4.84827	1.85633	0.0901708	0.999573
log-likelihoods	prom	chr11	gencode::OR5P3::ENSG00000182334.1	OR5P3	500	5	2.39344	2.08904	0.0902338	0.999573
log-likelihoods	prom	chr2	gencode::PCDP1::ENSG00000163075.8	PCDP1	972	8	4.78885	1.67055	0.0902575	0.999573
log-likelihoods	prom	chr15	gencode::RLBP1::ENSG00000140522.7	RLBP1	781	5	2.5348	1.97255	0.0903068	0.999573
log-likelihoods	prom	chr2	gencode::RPS27A::ENSG00000143947.8	RPS27A	953	5	1.83359	2.7269	0.0903905	0.999573
log-likelihoods	prom	chr4	gencode::USP17L17::ENSG00000249104.1	USP17L17	500	3	1.54782	1.93821	0.090473	0.999573
log-likelihoods	prom	chr3	gencode::NKIRAS1::ENSG00000197885.6	NKIRAS1	962	5	2.43488	2.05349	0.0905147	0.999573
log-likelihoods	prom	chr2	gencode::PCYOX1::ENSG00000116005.7	PCYOX1	1271	4	1.52348	2.62557	0.0905358	0.999573
log-likelihoods	prom	chr10	gencode::SEC23IP::ENSG00000107651.8	SEC23IP	782	5	2.39971	2.08359	0.0906156	0.999573
log-likelihoods	prom	chr5	gencode::SPINK6::ENSG00000178172.2	SPINK6	684	5	2.07743	2.40682	0.0906157	0.999573
log-likelihoods	prom	chr17	gencode::HEXIM2::ENSG00000168517.6	HEXIM2	1637	8	4.55922	1.75469	0.0906586	0.999573
log-likelihoods	prom	chr7	gencode::ZNF716::ENSG00000182111.8	ZNF716	847	11	5.69859	1.9303	0.0906741	0.999573
log-likelihoods	prom	chr1	gencode::GSTM2::ENSG00000213366.8	GSTM2	858	6	2.40348	2.49638	0.0906896	0.999573
log-likelihoods	prom	chr6	gencode::LIN28B::ENSG00000187772.6	LIN28B	785	8	4.05791	1.97146	0.0907375	0.999573
log-likelihoods	prom	chr8	gencode::DNAJC5B::ENSG00000147570.5	DNAJC5B	852	5	2.42752	2.05971	0.0908522	0.999592
log-likelihoods	prom	chr12	gencode::ANO6::ENSG00000177119.11	ANO6	1472	8	4.05936	1.97075	0.090863	0.999592
log-likelihoods	prom	chr8	gencode::C8orf37::ENSG00000156172.5	C8orf37	831	6	3.25854	1.84132	0.0909405	0.999592
log-likelihoods	prom	chr16	gencode::CIRH1A::ENSG00000141076.13	CIRH1A	868	4	2.10323	1.90184	0.0909479	0.999592
log-likelihoods	prom	chr1	gencode::OR10K1::ENSG00000173285.2	OR10K1	500	5	2.6432	1.89165	0.0910696	0.999742
log-likelihoods	prom	chr2	gencode::COQ10B::ENSG00000115520.4	COQ10B	642	5	2.07958	2.40433	0.0911268	0.999742
log-likelihoods	prom	chr12	gencode::BIN2::ENSG00000110934.6	BIN2	1250	8	3.80927	2.10014	0.091148	0.999742
log-likelihoods	prom	chr9	gencode::NAA35::ENSG00000135040.11	NAA35	905	7	3.67482	1.90485	0.0911703	0.999742
log-likelihoods	prom	chr2	gencode::FHL2::ENSG00000115641.14	FHL2	2377	9	5.61286	1.60346	0.0913601	1
log-likelihoods	prom	chr9	gencode::FCN1::ENSG00000085265.6	FCN1	803	5	2.7562	1.81409	0.0914378	1
log-likelihoods	prom	chr11	gencode::OR52B4::ENSG00000221996.2	OR52B4	500	5	2.33472	2.14159	0.0915064	1
log-likelihoods	prom	chr12	gencode::C1R::ENSG00000159403.11	C1R	849	6	3.029	1.98085	0.0915271	1
log-likelihoods	prom	chr3	gencode::POMGNT2::ENSG00000144647.5	POMGNT2	894	7	3.55661	1.96817	0.0916032	1
log-likelihoods	prom	chr17	gencode::ENTHD2::ENSG00000167302.5	ENTHD2	691	5	2.34148	2.1354	0.0916437	1
log-likelihoods	prom	chr1	gencode::SPRR2D::ENSG00000163216.6	SPRR2D	1389	10	5.95548	1.67913	0.0917393	1
log-likelihoods	prom	chr19	gencode::ACTN4::ENSG00000130402.7	ACTN4	828	5	2.67228	1.87106	0.0917474	1
log-likelihoods	prom	chr5	gencode::PDE4D::ENSG00000113448.12	PDE4D	6040	25	15.5331	1.60947	0.0917499	1
log-likelihoods	prom	chr18	gencode::SERPINB11::ENSG00000206072.8	SERPINB11	951	7	3.03554	2.30601	0.091781	1
log-likelihoods	prom	chr8	gencode::CLVS1::ENSG00000177182.6	CLVS1	831	7	3.47244	2.01587	0.0918728	1
log-likelihoods	prom	chr1	gencode::TIE1::ENSG00000066056.9	TIE1	1499	7	3.64074	1.92269	0.0919131	1
log-likelihoods	prom	chr2	gencode::AC110084.1::ENSG00000268656.1	AC110084.1	943	4	1.60431	2.49329	0.0919505	1
log-likelihoods	prom	chr1	gencode::TARS2::ENSG00000143374.10	TARS2	837	5	2.3901	2.09196	0.0919563	1
log-likelihoods	prom	chr4	gencode::KLB::ENSG00000134962.6	KLB	500	3	1.31034	2.28947	0.0922506	1
log-likelihoods	prom	chr16	gencode::CLEC19A::ENSG00000261210.1	CLEC19A	837	6	2.57774	2.32762	0.0923691	1
log-likelihoods	prom	chr16	gencode::TMEM114::ENSG00000232258.2	TMEM114	860	6	3.13866	1.91164	0.0923709	1
log-likelihoods	prom	chr16	gencode::ORC6::ENSG00000091651.4	ORC6	1540	8	4.39893	1.81862	0.0925834	1
log-likelihoods	prom	chr20	gencode::WFDC3::ENSG00000124116.14	WFDC3	1587	8	4.13645	1.93403	0.0925932	1
log-likelihoods	prom	chr19	gencode::CIC::ENSG00000079432.3	CIC	1831	11	6.45938	1.70295	0.0926103	1
log-likelihoods	prom	chr5	gencode::CARD6::ENSG00000132357.9	CARD6	640	5	1.98378	2.52044	0.0926183	1
log-likelihoods	prom	chr1	gencode::LCE4A::ENSG00000187170.4	LCE4A	1205	9	5.58941	1.61019	0.0926533	1
log-likelihoods	prom	chr5	gencode::GRAMD3::ENSG00000155324.5	GRAMD3	3095	12	6.99059	1.71659	0.0926646	1
log-likelihoods	prom	chr9	gencode::SLC2A8::ENSG00000136856.13	SLC2A8	775	7	2.96603	2.36006	0.0926778	1
log-likelihoods	prom	chr17	gencode::FN3KRP::ENSG00000141560.10	FN3KRP	823	6	2.73706	2.19214	0.0927724	1
log-likelihoods	prom	chr11	gencode::BAD::ENSG00000002330.9	BAD	364	2	0.579153	3.45332	0.092797	1
log-likelihoods	prom	chr5	gencode::MSX2::ENSG00000120149.7	MSX2	532	6	2.86496	2.09427	0.0928088	1
log-likelihoods	prom	chr18	gencode::AC015989.2::ENSG00000269630.1	AC015989.2	561	3	1.22804	2.44292	0.092843	1
log-likelihoods	prom	chr6	gencode::NOX3::ENSG00000074771.3	NOX3	847	8	3.21898	2.48526	0.092949	1
log-likelihoods	prom	chr1	gencode::C1orf192::ENSG00000188931.3	C1orf192	965	5	2.30518	2.16902	0.0929693	1
log-likelihoods	prom	chr19	gencode::MAP4K1::ENSG00000104814.8	MAP4K1	2094	14	6.77567	2.06622	0.0930221	1
log-likelihoods	prom	chr7	gencode::YAE1D1::ENSG00000241127.3	YAE1D1	856	7	3.48251	2.01005	0.0930913	1
log-likelihoods	prom	chr12	gencode::OR10A7::ENSG00000179919.3	OR10A7	500	4	2.03105	1.96943	0.0931678	1
log-likelihoods	prom	chr19	gencode::SYNGR4::ENSG00000105467.4	SYNGR4	1310	8	4.34666	1.84049	0.0932959	1
log-likelihoods	prom	chr8	gencode::AC138647.1::ENSG00000226490.1	AC138647.1	872	7	3.50848	1.99516	0.0933364	1
log-likelihoods	prom	chr5	gencode::SLC45A2::ENSG00000164175.10	SLC45A2	555	5	2.59935	1.92356	0.0934086	1
log-likelihoods	prom	chr22	gencode::POTEH::ENSG00000198062.10	POTEH	500	6	3.04839	1.96825	0.0934142	1
log-likelihoods	prom	chr22	gencode::UPK3A::ENSG00000100373.5	UPK3A	923	6	3.02826	1.98134	0.0935565	1
log-likelihoods	prom	chr3	gencode::ACAD9::ENSG00000177646.13	ACAD9	767	5	2.61718	1.91046	0.0935598	1
log-likelihoods	prom	chr22	gencode::SLC25A18::ENSG00000182902.9	SLC25A18	734	5	2.38861	2.09327	0.0938035	1
log-likelihoods	prom	chr19	gencode::C19orf40::ENSG00000131944.5	C19orf40	794	6	2.8733	2.08819	0.094118	1
log-likelihoods	prom	chr2	gencode::NMS::ENSG00000204640.1	NMS	915	8	4.03116	1.98454	0.0942042	1
log-likelihoods	prom	chr1	gencode::ABCA4::ENSG00000198691.7	ABCA4	2579	13	7.9	1.64557	0.094223	1
log-likelihoods	prom	chr10	gencode::AKR1CL1::ENSG00000196326.6	AKR1CL1	1803	16	7.24984	2.20694	0.0942516	1
log-likelihoods	prom	chr7	gencode::EPO::ENSG00000130427.2	EPO	804	5	2.81416	1.77673	0.0943288	1
log-likelihoods	prom	chr17	gencode::ZPBP2::ENSG00000186075.8	ZPBP2	737	7	3.20616	2.1833	0.0944459	1
log-likelihoods	prom	chr10	gencode::PNLIPRP2::ENSG00000165862.10	PNLIPRP2	908	8	4.10825	1.9473	0.0945815	1
log-likelihoods	prom	chr16	gencode::CA7::ENSG00000168748.9	CA7	1097	7	3.42011	2.04672	0.0946308	1
log-likelihoods	prom	chr11	gencode::SYTL2::ENSG00000137501.12	SYTL2	3295	16	9.82575	1.62837	0.0946889	1
log-likelihoods	prom	chr18	gencode::CDH7::ENSG00000081138.9	CDH7	1038	9	5.00662	1.79762	0.0947805	1
log-likelihoods	prom	chr1	gencode::TEDDM1::ENSG00000203730.2	TEDDM1	500	5	2.33329	2.1429	0.0948019	1
log-likelihoods	prom	chr20	gencode::KCNS1::ENSG00000124134.4	KCNS1	809	5	2.53383	1.9733	0.0948083	1
log-likelihoods	prom	chr15	gencode::ANKDD1A::ENSG00000166839.12	ANKDD1A	1851	9	5.11646	1.75903	0.0949293	1
log-likelihoods	prom	chr4	gencode::ANXA10::ENSG00000109511.6	ANXA10	794	6	2.49857	2.40138	0.0952282	1
log-likelihoods	prom	chr17	gencode::MYL4::ENSG00000198336.5	MYL4	978	7	3.21477	2.17745	0.0952512	1
log-likelihoods	prom	chr10	gencode::C10orf112::ENSG00000204740.5	C10orf112	1682	18	9.11412	1.97496	0.0953097	1
log-likelihoods	prom	chr16	gencode::VPS35::ENSG00000069329.11	VPS35	889	5	2.68816	1.86001	0.0953812	1
log-likelihoods	prom	chr5	gencode::SLC22A5::ENSG00000197375.8	SLC22A5	605	4	1.99064	2.0094	0.0954044	1
log-likelihoods	prom	chr9	gencode::ENTPD2::ENSG00000054179.7	ENTPD2	860	5	2.8996	1.72438	0.0955794	1
log-likelihoods	prom	chr3	gencode::SAMD7::ENSG00000187033.5	SAMD7	748	6	2.75273	2.17966	0.0958333	1
log-likelihoods	prom	chr5	gencode::MARVELD2::ENSG00000152939.10	MARVELD2	1249	7	4.03455	1.73502	0.0960028	1
log-likelihoods	prom	chr16	gencode::KIAA0513::ENSG00000135709.8	KIAA0513	1982	10	5.71809	1.74884	0.096043	1
log-likelihoods	prom	chr18	gencode::MC4R::ENSG00000166603.3	MC4R	500	6	2.76691	2.16848	0.0963609	1
log-likelihoods	prom	chr8	gencode::ARHGAP39::ENSG00000147799.7	ARHGAP39	1707	11	6.65046	1.65402	0.0964614	1
log-likelihoods	prom	chr4	gencode::UGT2B15::ENSG00000196620.4	UGT2B15	500	4	1.94597	2.05553	0.0965391	1
log-likelihoods	prom	chr12	gencode::HOXC13::ENSG00000123364.3	HOXC13	500	4	1.78088	2.24608	0.0966164	1
log-likelihoods	prom	chr9	gencode::STOML2::ENSG00000165283.11	STOML2	772	5	3.03824	1.64569	0.0966864	1
log-likelihoods	prom	chr5	gencode::C5orf50::ENSG00000185662.4	C5orf50	893	6	3.14945	1.9051	0.0967906	1
log-likelihoods	prom	chr19	gencode::MBD3L1::ENSG00000170948.3	MBD3L1	1251	10	5.82167	1.71772	0.0968071	1
log-likelihoods	prom	chr10	gencode::FRA10AC1::ENSG00000148690.10	FRA10AC1	804	6	2.89281	2.07411	0.0968633	1
log-likelihoods	prom	chr11	gencode::OSBPL5::ENSG00000021762.15	OSBPL5	2275	10	6.3171	1.583	0.0969041	1
log-likelihoods	prom	chr6	gencode::HIST1H3E::ENSG00000196966.3	HIST1H3E	538	5	2.51672	1.98672	0.0969321	1
log-likelihoods	prom	chr2	gencode::TTC32::ENSG00000183891.5	TTC32	747	5	3.38319	1.47789	0.0971275	1
log-likelihoods	prom	chr6	gencode::UBE3D::ENSG00000118420.12	UBE3D	880	6	3.72961	1.60875	0.0971368	1
log-likelihoods	prom	chr14	gencode::HSPA2::ENSG00000126803.8	HSPA2	1427	7	4.22886	1.65529	0.0972064	1
log-likelihoods	prom	chr4	gencode::SMIM20::ENSG00000250317.4	SMIM20	884	8	3.99099	2.00451	0.097215	1
log-likelihoods	prom	chr1	gencode::SPRR2F::ENSG00000244094.1	SPRR2F	956	8	3.9678	2.01623	0.0972681	1
log-likelihoods	prom	chr2	gencode::PCGF1::ENSG00000115289.8	PCGF1	500	4	1.62374	2.46345	0.0973077	1
log-likelihoods	prom	chr7	gencode::ZNF789::ENSG00000198556.9	ZNF789	853	6	2.8167	2.13015	0.0974819	1
log-likelihoods	prom	chr11	gencode::OR6X1::ENSG00000221931.2	OR6X1	500	4	1.65511	2.41676	0.0976905	1
log-likelihoods	prom	chr9	gencode::SPATA6L::ENSG00000106686.12	SPATA6L	862	6	2.7426	2.1877	0.0977595	1
log-likelihoods	prom	chr19	gencode::LGALS4::ENSG00000171747.4	LGALS4	500	3	1.40327	2.13786	0.0977878	1
log-likelihoods	prom	chr17	gencode::FGF11::ENSG00000161958.6	FGF11	1058	7	3.52409	1.98633	0.0977969	1
log-likelihoods	prom	chr13	gencode::RNF113B::ENSG00000139797.7	RNF113B	500	3	1.387	2.16294	0.0978247	1
log-likelihoods	prom	chr21	gencode::KRTAP22-1::ENSG00000186924.2	KRTAP22-1	801	6	3.07626	1.95042	0.0978858	1
log-likelihoods	prom	chr12	gencode::FAM216A::ENSG00000204856.7	FAM216A	357	2	0.758769	2.63585	0.0978948	1
log-likelihoods	prom	chr1	gencode::PRPF38A::ENSG00000134748.12	PRPF38A	466	4	1.58244	2.52775	0.0980421	1
log-likelihoods	prom	chr1	gencode::TNFSF18::ENSG00000120337.7	TNFSF18	822	7	2.75368	2.54205	0.0981234	1
log-likelihoods	prom	chr22	gencode::ST13::ENSG00000100380.8	ST13	336	3	0.885596	3.38755	0.0981568	1
log-likelihoods	prom	chr12	gencode::TSPAN31::ENSG00000135452.5	TSPAN31	846	5	2.56708	1.94774	0.0981701	1
log-likelihoods	prom	chr14	gencode::RNASE2::ENSG00000169385.2	RNASE2	726	5	2.3524	2.12549	0.0982121	1
log-likelihoods	prom	chr12	gencode::SLC35E3::ENSG00000175782.8	SLC35E3	500	4	1.71239	2.33592	0.0982195	1
log-likelihoods	prom	chr14	gencode::SYNJ2BP::ENSG00000213463.3	SYNJ2BP	852	6	3.36637	1.78233	0.0983885	1
log-likelihoods	prom	chr6	gencode::SNRPC::ENSG00000124562.5	SNRPC	597	4	1.5866	2.52112	0.0985417	1
log-likelihoods	prom	chr19	gencode::IGFL3::ENSG00000188624.2	IGFL3	890	5	2.48026	2.01592	0.0985609	1
log-likelihoods	prom	chr22	gencode::AL022328.1::ENSG00000268427.1	AL022328.1	284	2	0.802363	2.49264	0.0985861	1
log-likelihoods	prom	chr9	gencode::NOL6::ENSG00000165271.12	NOL6	884	5	2.30005	2.17386	0.0986438	1
log-likelihoods	prom	chr11	gencode::OR8B4::ENSG00000198657.3	OR8B4	500	5	3.19522	1.56484	0.0987858	1
log-likelihoods	prom	chr3	gencode::COX17::ENSG00000138495.2	COX17	746	6	3.37347	1.77859	0.0988499	1
log-likelihoods	prom	chr12	gencode::GPN3::ENSG00000111231.4	GPN3	657	3	1.41152	2.12536	0.0989902	1
log-likelihoods	prom	chr6	gencode::TBPL1::ENSG00000028839.5	TBPL1	767	5	2.37768	2.10289	0.0990258	1
log-likelihoods	prom	chr22	gencode::ACO2::ENSG00000100412.11	ACO2	844	4	2.01331	1.98678	0.099159	1
log-likelihoods	prom	chr17	gencode::KRTAP4-4::ENSG00000171396.10	KRTAP4-4	500	5	1.91715	2.60804	0.0993571	1
log-likelihoods	prom	chr11	gencode::OR51A7::ENSG00000176895.8	OR51A7	500	5	2.6743	1.86965	0.099439	1
log-likelihoods	prom	chr1	gencode::DPM3::ENSG00000179085.7	DPM3	581	4	1.81469	2.20423	0.0995079	1
log-likelihoods	prom	chr8	gencode::C8orf76::ENSG00000189376.7	C8orf76	829	5	2.50948	1.99244	0.0995248	1
log-likelihoods	prom	chr11	gencode::ZFPL1::ENSG00000162300.7	ZFPL1	584	4	1.65019	2.42397	0.099604	1
log-likelihoods	prom	chr12	gencode::AC078925.1::ENSG00000268091.1	AC078925.1	538	4	1.89466	2.11119	0.0996784	1
log-likelihoods	prom	chr15	gencode::SCAMP2::ENSG00000140497.12	SCAMP2	831	5	2.59089	1.92984	0.0996827	1
log-likelihoods	prom	chr7	gencode::ZNF777::ENSG00000196453.7	ZNF777	689	5	2.64274	1.89197	0.0997509	1
log-likelihoods	prom	chr19	gencode::DHX34::ENSG00000134815.14	DHX34	926	6	2.96758	2.02185	0.0997897	1
log-likelihoods	prom	chr7	gencode::PTPN12::ENSG00000127947.11	PTPN12	1347	9	5.26793	1.70845	0.0999053	1
log-likelihoods	prom	chr19	gencode::ZNF229::ENSG00000167383.4	ZNF229	870	6	3.60831	1.66283	0.099948	1
log-likelihoods	prom	chr6	gencode::GPANK1::ENSG00000204438.6	GPANK1	363	3	1.20407	2.49155	0.0999652	1
log-likelihoods	prom	chr1	gencode::TXNIP::ENSG00000117289.7	TXNIP	500	4	1.93389	2.06837	0.100124	1
log-likelihoods	prom	chr16	gencode::RPS15A::ENSG00000134419.11	RPS15A	1493	8	4.70987	1.69856	0.100158	1
log-likelihoods	prom	chr1	gencode::OR2T6::ENSG00000198104.2	OR2T6	500	6	2.79975	2.14305	0.100203	1
log-likelihoods	prom	chr19	gencode::MAN2B1::ENSG00000104774.8	MAN2B1	611	3	1.31265	2.28544	0.100238	1
log-likelihoods	prom	chr17	gencode::OR1E2::ENSG00000127780.3	OR1E2	500	5	1.85886	2.68983	0.100295	1
log-likelihoods	prom	chr3	gencode::C3orf27::ENSG00000198685.2	C3orf27	726	5	2.60956	1.91603	0.100527	1
log-likelihoods	prom	chr4	gencode::SMARCA5::ENSG00000153147.5	SMARCA5	500	4	2.44938	1.63307	0.100564	1
log-likelihoods	prom	chr3	gencode::GUCA1C::ENSG00000138472.6	GUCA1C	794	7	3.7991	1.84254	0.100576	1
log-likelihoods	prom	chr2	gencode::CKAP2L::ENSG00000169607.8	CKAP2L	932	6	2.8583	2.09915	0.10065	1
log-likelihoods	prom	chr14	gencode::RNASE3::ENSG00000169397.3	RNASE3	726	6	3.18138	1.88598	0.100695	1
log-likelihoods	prom	chr11	gencode::TBX10::ENSG00000167800.9	TBX10	903	7	3.4963	2.00211	0.100838	1
log-likelihoods	prom	chr1	gencode::HNRNPCL1::ENSG00000179172.7	HNRNPCL1	706	7	2.94713	2.3752	0.100889	1
log-likelihoods	prom	chr11	gencode::C1QTNF4::ENSG00000172247.3	C1QTNF4	500	3	1.47952	2.02768	0.101123	1
log-likelihoods	prom	chr5	gencode::HSPA4::ENSG00000170606.9	HSPA4	602	4	1.87569	2.13254	0.101154	1
log-likelihoods	prom	chr10	gencode::FRMD4A::ENSG00000151474.15	FRMD4A	3787	21	13.5012	1.55541	0.101222	1
log-likelihoods	prom	chr2	gencode::SMPD4::ENSG00000136699.15	SMPD4	907	4	2.24767	1.77962	0.101275	1
log-likelihoods	prom	chr19	gencode::HIPK4::ENSG00000160396.8	HIPK4	500	4	1.40154	2.854	0.101354	1
log-likelihoods	prom	chr2	gencode::ERLEC1::ENSG00000068912.9	ERLEC1	275	2	0.620754	3.22189	0.10138	1
log-likelihoods	prom	chr5	gencode::EMB::ENSG00000170571.7	EMB	1414	12	7.55531	1.58829	0.101537	1
log-likelihoods	prom	chr1	gencode::KCNJ9::ENSG00000162728.4	KCNJ9	870	6	2.83806	2.11412	0.101775	1
log-likelihoods	prom	chr9	gencode::CCL21::ENSG00000137077.3	CCL21	688	4	1.73185	2.30967	0.101923	1
log-likelihoods	prom	chr4	gencode::PROM1::ENSG00000007062.7	PROM1	1768	11	5.85474	1.87882	0.10197	1
log-likelihoods	prom	chr3	gencode::TIPARP::ENSG00000163659.8	TIPARP	2384	10	6.10151	1.63894	0.102195	1
log-likelihoods	prom	chr3	gencode::SENP2::ENSG00000163904.8	SENP2	1677	11	5.69905	1.93015	0.102203	1
log-likelihoods	prom	chr2	gencode::AGAP1::ENSG00000157985.13	AGAP1	1854	10	5.95047	1.68054	0.102215	1
log-likelihoods	prom	chr1	gencode::LYSMD1::ENSG00000163155.7	LYSMD1	336	3	0.886545	3.38392	0.102327	1
log-likelihoods	prom	chr6	gencode::TPMT::ENSG00000137364.4	TPMT	711	6	2.38633	2.51432	0.102352	1
log-likelihoods	prom	chr8	gencode::CPQ::ENSG00000104324.11	CPQ	822	8	4.23856	1.88744	0.102397	1
log-likelihoods	prom	chr16	gencode::TAOK2::ENSG00000149930.13	TAOK2	1130	6	2.801	2.1421	0.10245	1
log-likelihoods	prom	chr5	gencode::CTD-2203A3.1::ENSG00000248789.1	CTD-2203A3.1	963	7	4.75822	1.47114	0.102615	1
log-likelihoods	prom	chr13	gencode::POLR1D::ENSG00000186184.11	POLR1D	971	6	4.01408	1.49474	0.10271	1
log-likelihoods	prom	chr12	gencode::IKBIP::ENSG00000166130.10	IKBIP	93	1	0.275873	3.62486	0.102823	1
log-likelihoods	prom	chr1	gencode::TINAGL1::ENSG00000142910.11	TINAGL1	940	5	2.74846	1.8192	0.102965	1
log-likelihoods	prom	chr6	gencode::MEA1::ENSG00000124733.3	MEA1	677	3	1.57406	1.9059	0.10305	1
log-likelihoods	prom	chr15	gencode::BBS4::ENSG00000140463.9	BBS4	879	6	2.68318	2.23616	0.103074	1
log-likelihoods	prom	chr14	gencode::RNASE4::ENSG00000258818.2	RNASE4	1794	8	4.93972	1.61952	0.103275	1
log-likelihoods	prom	chr14	gencode::KLHL33::ENSG00000185271.6	KLHL33	819	6	3.176	1.88917	0.10339	1
log-likelihoods	prom	chr11	gencode::TIMM10B::ENSG00000132286.7	TIMM10B	635	3	1.48768	2.01657	0.103404	1
log-likelihoods	prom	chr2	gencode::MRPL19::ENSG00000115364.9	MRPL19	768	7	3.27416	2.13796	0.103461	1
log-likelihoods	prom	chr19	gencode::CATSPERG::ENSG00000099338.18	CATSPERG	1155	7	4.45431	1.57151	0.103512	1
log-likelihoods	prom	chr1	gencode::HSPB11::ENSG00000081870.7	HSPB11	1509	7	3.39624	2.0611	0.103516	1
log-likelihoods	prom	chr10	gencode::WBP1L::ENSG00000166272.12	WBP1L	1630	8	3.89129	2.05587	0.103641	1
log-likelihoods	prom	chr12	gencode::FAM71C::ENSG00000180219.1	FAM71C	500	4	1.72661	2.31668	0.103685	1
log-likelihoods	prom	chr16	gencode::IFT140::ENSG00000187535.9	IFT140	851	5	2.61177	1.91441	0.103701	1
log-likelihoods	prom	chr16	gencode::C16orf59::ENSG00000162062.10	C16orf59	737	5	2.40567	2.07843	0.103894	1
log-likelihoods	prom	chr15	gencode::GLCE::ENSG00000138604.5	GLCE	1372	7	3.84374	1.82114	0.103983	1
log-likelihoods	prom	chr1	gencode::KCNK2::ENSG00000082482.9	KCNK2	1699	14	8.00783	1.74829	0.104014	1
log-likelihoods	prom	chr14	gencode::HNRNPC::ENSG00000092199.13	HNRNPC	1816	9	5.01051	1.79622	0.104068	1
log-likelihoods	prom	chr11	gencode::CSNK2A3::ENSG00000254598.2	CSNK2A3	500	4	1.21998	3.27875	0.104186	1
log-likelihoods	prom	chr2	gencode::UGT1A9::ENSG00000241119.1	UGT1A9	500	3	1.18678	2.52785	0.104307	1
log-likelihoods	prom	chr10	gencode::BICC1::ENSG00000122870.7	BICC1	1668	10	5.51177	1.8143	0.104543	1
log-likelihoods	prom	chr17	gencode::KRTAP9-4::ENSG00000241595.1	KRTAP9-4	500	4	1.65107	2.42267	0.104572	1
log-likelihoods	prom	chr16	gencode::PRM3::ENSG00000178257.2	PRM3	691	4	2.14315	1.86641	0.104584	1
log-likelihoods	prom	chr20	gencode::GDAP1L1::ENSG00000124194.11	GDAP1L1	839	6	3.06051	1.96046	0.104704	1
log-likelihoods	prom	chr11	gencode::OR5W2::ENSG00000187612.1	OR5W2	500	5	2.61908	1.90907	0.104714	1
log-likelihoods	prom	chr7	gencode::CCDC146::ENSG00000135205.10	CCDC146	882	6	3.28573	1.82608	0.104767	1
log-likelihoods	prom	chr1	gencode::CAMSAP2::ENSG00000118200.10	CAMSAP2	810	5	2.91771	1.71367	0.104925	1
log-likelihoods	prom	chr5	gencode::C5orf46::ENSG00000178776.4	C5orf46	927	5	2.76705	1.80698	0.104936	1
log-likelihoods	prom	chr2	gencode::DNAJC5G::ENSG00000163793.8	DNAJC5G	755	5	2.39999	2.08334	0.105016	1
log-likelihoods	prom	chr2	gencode::ARHGAP15::ENSG00000075884.8	ARHGAP15	1782	10	5.45544	1.83303	0.105076	1
log-likelihoods	prom	chr12	gencode::ATP6V0A2::ENSG00000185344.9	ATP6V0A2	1133	7	3.83047	1.82745	0.105091	1
log-likelihoods	prom	chr3	gencode::GLT8D1::ENSG00000016864.12	GLT8D1	1293	4	1.75773	2.27567	0.105117	1
log-likelihoods	prom	chr18	gencode::RP11-169F17.1::ENSG00000263711.1	RP11-169F17.1	783	8	4.06822	1.96646	0.105425	1
log-likelihoods	prom	chr9	gencode::KCNV2::ENSG00000168263.8	KCNV2	500	4	1.99032	2.00973	0.105511	1
log-likelihoods	prom	chr12	gencode::SDS::ENSG00000135094.6	SDS	877	5	2.33121	2.14481	0.105601	1
log-likelihoods	prom	chr11	gencode::PCF11::ENSG00000165494.6	PCF11	500	4	1.79426	2.22933	0.105632	1
log-likelihoods	prom	chr4	gencode::PHOX2B::ENSG00000109132.5	PHOX2B	500	3	1.78633	1.67942	0.105646	1
log-likelihoods	prom	chr3	gencode::SLC25A26::ENSG00000144741.13	SLC25A26	2171	10	5.45695	1.83253	0.105746	1
log-likelihoods	prom	chr16	gencode::KLHDC4::ENSG00000104731.9	KLHDC4	890	5	2.83703	1.76241	0.105932	1
log-likelihoods	prom	chr19	gencode::DPRX::ENSG00000204595.1	DPRX	919	10	5.1269	1.9505	0.105947	1
log-likelihoods	prom	chr12	gencode::ASB8::ENSG00000177981.6	ASB8	954	6	2.94585	2.03676	0.106001	1
log-likelihoods	prom	chr11	gencode::TPCN2::ENSG00000162341.11	TPCN2	852	8	3.62442	2.20725	0.106093	1
log-likelihoods	prom	chr1	gencode::AC004824.2::ENSG00000269468.1	AC004824.2	909	5	2.43575	2.05276	0.106152	1
log-likelihoods	prom	chr11	gencode::C1QTNF5::ENSG00000223953.3	C1QTNF5	927	5	2.39476	2.08789	0.106185	1
log-likelihoods	prom	chr8	gencode::RP1L1::ENSG00000183638.5	RP1L1	793	7	3.09661	2.26054	0.106234	1
log-likelihoods	prom	chr22	gencode::GAS2L1::ENSG00000185340.11	GAS2L1	500	3	1.61869	1.85335	0.106298	1
log-likelihoods	prom	chr3	gencode::CCR8::ENSG00000179934.5	CCR8	941	6	3.15369	1.90253	0.106393	1
log-likelihoods	prom	chr9	gencode::LCN8::ENSG00000204001.5	LCN8	678	4	2.2584	1.77116	0.106464	1
log-likelihoods	prom	chr3	gencode::CLRN1::ENSG00000163646.6	CLRN1	1326	11	5.62158	1.95675	0.106585	1
log-likelihoods	prom	chr10	gencode::LDB3::ENSG00000122367.15	LDB3	945	5	2.34914	2.12844	0.106662	1
log-likelihoods	prom	chr13	gencode::ALG11::ENSG00000253710.1	ALG11	949	8	3.6028	2.22049	0.106706	1
log-likelihoods	prom	chr4	gencode::NUDT6::ENSG00000170917.9	NUDT6	1600	7	3.39163	2.0639	0.1068	1
log-likelihoods	prom	chr22	gencode::MICAL3::ENSG00000243156.3	MICAL3	1439	7	4.14021	1.69074	0.106823	1
log-likelihoods	prom	chr6	gencode::C6orf89::ENSG00000198663.12	C6orf89	1579	8	3.97619	2.01198	0.10684	1
log-likelihoods	prom	chr1	gencode::SLC9C2::ENSG00000162753.10	SLC9C2	698	5	2.0847	2.39842	0.106892	1
log-likelihoods	prom	chr5	gencode::PCDHA3::ENSG00000255408.2	PCDHA3	500	4	1.0863	3.68222	0.106955	1
log-likelihoods	prom	chr17	gencode::GOSR1::ENSG00000108587.10	GOSR1	938	5	2.71922	1.83877	0.107005	1
log-likelihoods	prom	chr11	gencode::PTPMT1::ENSG00000110536.9	PTPMT1	612	4	1.87408	2.13438	0.10702	1
log-likelihoods	prom	chr11	gencode::SLC1A2::ENSG00000110436.7	SLC1A2	1533	11	5.93022	1.85491	0.107028	1
log-likelihoods	prom	chr5	gencode::CDX1::ENSG00000113722.12	CDX1	500	4	1.93492	2.06727	0.107115	1
log-likelihoods	prom	chr6	gencode::FAM83B::ENSG00000168143.8	FAM83B	942	8	4.32319	1.85048	0.107192	1
log-likelihoods	prom	chr11	gencode::OR4A16::ENSG00000181961.2	OR4A16	500	5	2.47454	2.02058	0.107335	1
log-likelihoods	prom	chr4	gencode::MTRNR2L13::ENSG00000270394.1	MTRNR2L13	500	4	2.0843	1.91911	0.107346	1
log-likelihoods	prom	chr17	gencode::NME1-NME2::ENSG00000243678.7	NME1-NME2	1993	6	3.58917	1.6717	0.10735	1
log-likelihoods	prom	chr11	gencode::MOGAT2::ENSG00000166391.10	MOGAT2	1337	8	4.05818	1.97133	0.107691	1
log-likelihoods	prom	chr10	gencode::AKR1C3::ENSG00000196139.7	AKR1C3	1301	8	3.75995	2.12769	0.1078	1
log-likelihoods	prom	chr2	gencode::KCNJ3::ENSG00000162989.3	KCNJ3	500	7	4.41104	1.58693	0.107897	1
log-likelihoods	prom	chr12	gencode::PPP1R12A::ENSG00000058272.11	PPP1R12A	1796	9	5.0601	1.77862	0.107954	1
log-likelihoods	prom	chr6	gencode::PHACTR1::ENSG00000112137.12	PHACTR1	3155	18	11.0907	1.62298	0.107963	1
log-likelihoods	prom	chr3	gencode::TMPRSS7::ENSG00000176040.9	TMPRSS7	1901	13	5.68527	2.28661	0.10797	1
log-likelihoods	prom	chr6	gencode::TRAPPC3L::ENSG00000173626.5	TRAPPC3L	1360	8	3.85429	2.07561	0.108161	1
log-likelihoods	prom	chr20	gencode::TRMT6::ENSG00000089195.10	TRMT6	485	4	1.48445	2.6946	0.108242	1
log-likelihoods	prom	chr14	gencode::SOCS4::ENSG00000180008.8	SOCS4	863	5	1.98565	2.51807	0.108252	1
log-likelihoods	prom	chr1	gencode::ZBTB48::ENSG00000204859.7	ZBTB48	690	4	2.11084	1.89498	0.108392	1
log-likelihoods	prom	chr7	gencode::ZBED6CL::ENSG00000188707.4	ZBED6CL	500	3	1.07986	2.77813	0.108629	1
log-likelihoods	prom	chr12	gencode::OR6C75::ENSG00000187857.3	OR6C75	500	5	2.11584	2.36313	0.108693	1
log-likelihoods	prom	chr22	gencode::GRAP2::ENSG00000100351.12	GRAP2	2187	12	6.24014	1.92303	0.108725	1
log-likelihoods	prom	chr11	gencode::TMPRSS4::ENSG00000137648.12	TMPRSS4	786	5	2.62574	1.90422	0.108945	1
log-likelihoods	prom	chr12	gencode::GOLT1B::ENSG00000111711.5	GOLT1B	563	5	2.59796	1.92459	0.109267	1
log-likelihoods	prom	chr12	gencode::RERGL::ENSG00000111404.2	RERGL	945	8	4.75742	1.68158	0.109295	1
log-likelihoods	prom	chr8	gencode::LAPTM4B::ENSG00000104341.12	LAPTM4B	665	5	2.08058	2.40318	0.109437	1
log-likelihoods	prom	chr18	gencode::RBBP8::ENSG00000101773.12	RBBP8	2689	11	6.60649	1.66503	0.10947	1
log-likelihoods	prom	chr14	gencode::RP11-407N17.3::ENSG00000258941.2	RP11-407N17.3	1108	6	2.62265	2.28776	0.10948	1
log-likelihoods	prom	chr6	gencode::NEU1::ENSG00000204386.6	NEU1	494	4	1.87605	2.13214	0.10952	1
log-likelihoods	prom	chr20	gencode::TUBB1::ENSG00000101162.3	TUBB1	672	4	1.7431	2.29476	0.109538	1
log-likelihoods	prom	chr11	gencode::ARL14EP::ENSG00000152219.4	ARL14EP	846	9	5.07798	1.77236	0.109722	1
log-likelihoods	prom	chr4	gencode::UGT2B28::ENSG00000135226.12	UGT2B28	500	4	2.23272	1.79154	0.109807	1
log-likelihoods	prom	chr16	gencode::NFATC3::ENSG00000072736.14	NFATC3	871	6	2.50912	2.39128	0.109814	1
log-likelihoods	prom	chr17	gencode::TMEM220::ENSG00000187824.4	TMEM220	791	7	3.89035	1.79932	0.109822	1
log-likelihoods	prom	chr11	gencode::PPP1CA::ENSG00000172531.10	PPP1CA	932	5	2.38313	2.09808	0.110152	1
log-likelihoods	prom	chr5	gencode::CCDC152::ENSG00000198865.5	CCDC152	930	8	4.14122	1.9318	0.110201	1
log-likelihoods	prom	chr17	gencode::TAX1BP3::ENSG00000213977.3	TAX1BP3	516	4	1.93381	2.06846	0.110241	1
log-likelihoods	prom	chr12	gencode::HBCBP::ENSG00000268162.1	HBCBP	276	2	0.698186	2.86457	0.110392	1
log-likelihoods	prom	chr11	gencode::ALDH3B2::ENSG00000132746.10	ALDH3B2	1776	9	4.74009	1.8987	0.110736	1
log-likelihoods	prom	chr1	gencode::NR5A2::ENSG00000116833.9	NR5A2	1321	10	5.34326	1.87152	0.111058	1
log-likelihoods	prom	chr11	gencode::OR51G2::ENSG00000176893.3	OR51G2	500	5	2.80763	1.78086	0.111089	1
log-likelihoods	prom	chr2	gencode::PPM1B::ENSG00000138032.16	PPM1B	633	5	2.83532	1.76347	0.11112	1
log-likelihoods	prom	chr11	gencode::CYB561A3::ENSG00000162144.5	CYB561A3	1740	5	2.26747	2.2051	0.111274	1
log-likelihoods	prom	chr12	gencode::CACNA2D4::ENSG00000151062.10	CACNA2D4	2547	17	9.55175	1.77978	0.111445	1
log-likelihoods	prom	chr1	gencode::CHIA::ENSG00000134216.14	CHIA	1945	13	7.29549	1.78192	0.111461	1
log-likelihoods	prom	chr6	gencode::AL078585.1::ENSG00000225683.1	AL078585.1	791	7	3.36513	2.08016	0.111506	1
log-likelihoods	prom	chr19	gencode::AC010646.3::ENSG00000269095.1	AC010646.3	774	4	1.96789	2.03264	0.111671	1
log-likelihoods	prom	chr6	gencode::RWDD1::ENSG00000111832.8	RWDD1	831	6	3.24113	1.8512	0.111972	1
log-likelihoods	prom	chr7	gencode::RABGEF1::ENSG00000154710.11	RABGEF1	1678	8	4.89256	1.63513	0.111985	1
log-likelihoods	prom	chr1	gencode::SCNM1::ENSG00000163156.7	SCNM1	356	3	0.924871	3.24369	0.11205	1
log-likelihoods	prom	chr4	gencode::ALPK1::ENSG00000073331.13	ALPK1	908	6	2.56268	2.3413	0.11222	1
log-likelihoods	prom	chr8	gencode::XKR6::ENSG00000171044.6	XKR6	1404	12	6.73767	1.78103	0.112222	1
log-likelihoods	prom	chr21	gencode::KRTAP23-1::ENSG00000186980.5	KRTAP23-1	792	8	4.76309	1.67958	0.112225	1
[truncated: 17,158 more rows]

## Sheet: LogLik_ss
scheme	type	chromosome	id	gname	size	n_mut_observed	n_mut_expected	observed_expected_ratio	p_value	p_value_BH
log-likelihoods	ss	chr17	gencode::TP53::ENSG00000141510.11	TP53	52	12	0.0856668	140.078	6.60572e-26	1.18024e-21
log-likelihoods	ss	chr19	gencode::STK11::ENSG00000118046.10	STK11	36	4	0.0720476	55.5188	2.07915e-08	0.000185741
log-likelihoods	ss	chr17	gencode::NF1::ENSG00000196712.12	NF1	232	5	0.332953	15.0171	2.02251e-06	0.0120454
log-likelihoods	ss	chr3	gencode::PBRM1::ENSG00000163939.14	PBRM1	124	4	0.229901	17.3988	1.7443e-05	0.0648311
log-likelihoods	ss	chr3	gencode::VHL::ENSG00000134086.7	VHL	8	2	0.0128586	155.538	1.81427e-05	0.0648311
log-likelihoods	ss	chr15	gencode::ITGA11::ENSG00000137809.12	ITGA11	116	4	0.300313	13.3195	2.5532e-05	0.0760299
log-likelihoods	ss	chr13	gencode::SKA3::ENSG00000165480.11	SKA3	32	2	0.0500042	39.9967	4.91208e-05	0.125377
log-likelihoods	ss	chr2	gencode::RP13-512J5.1::ENSG00000255767.1	RP13-512J5.1	6	1	0.0206899	48.3328	6.20104e-05	0.138493
log-likelihoods	ss	chr10	gencode::PTEN::ENSG00000171862.5	PTEN	32	2	0.0545458	36.6664	8.36103e-05	0.165985
log-likelihoods	ss	chr1	gencode::XCL1::ENSG00000143184.4	XCL1	8	2	0.0186347	107.327	9.94113e-05	0.177618
log-likelihoods	ss	chr15	gencode::B2M::ENSG00000166710.13	B2M	10	2	0.0373174	53.5943	0.000142383	0.23127
log-likelihoods	ss	chr4	gencode::MARCH1::ENSG00000145416.9	2001-03-01	36	3	0.182692	16.4211	0.000306448	0.456276
log-likelihoods	ss	chr9	gencode::CDKN2A::ENSG00000147889.12	CDKN2A	24	2	0.0468875	42.6553	0.000435917	0.599117
log-likelihoods	ss	chr2	gencode::ATG4B::ENSG00000168397.12	ATG4B	56	2	0.126506	15.8096	0.000557404	0.664221
log-likelihoods	ss	chr2	gencode::CYP4F31P::ENSG00000178206.3	CYP4F31P	16	1	0.0580084	17.2389	0.000562026	0.664221
log-likelihoods	ss	chr15	gencode::PRC1::ENSG00000198901.9	PRC1	56	2	0.0951878	21.0111	0.000594814	0.664221
log-likelihoods	ss	chr4	gencode::FBXW7::ENSG00000109670.9	FBXW7	56	2	0.128997	15.5042	0.000664394	0.677367
log-likelihoods	ss	chr19	gencode::TGFB1::ENSG00000105329.5	TGFB1	24	2	0.0460022	43.4762	0.000682409	0.677367
log-likelihoods	ss	chr20	gencode::PAK7::ENSG00000101349.12	PAK7	44	3	0.23687	12.6652	0.00087117	0.721001
log-likelihoods	ss	chr22	gencode::CHEK2::ENSG00000183765.16	CHEK2	72	2	0.156993	12.7394	0.000880517	0.721001
log-likelihoods	ss	chr13	gencode::COG3::ENSG00000136152.10	COG3	88	3	0.210006	14.2853	0.000903939	0.721001
log-likelihoods	ss	chr8	gencode::CLVS1::ENSG00000177182.6	CLVS1	24	2	0.0644661	31.0241	0.000946194	0.721001
log-likelihoods	ss	chr14	gencode::ACOT2::ENSG00000119673.10	ACOT2	10	1	0.0207966	48.0849	0.00108098	0.721001
log-likelihoods	ss	chr19	gencode::EML2::ENSG00000125746.10	EML2	88	2	0.171187	11.6831	0.00109808	0.721001
log-likelihoods	ss	chr22	gencode::TCN2::ENSG00000185339.4	TCN2	32	2	0.0854602	23.4027	0.0011328	0.721001
log-likelihoods	ss	chr9	gencode::MOB3B::ENSG00000120162.9	MOB3B	12	1	0.030691	32.5829	0.00114349	0.721001
log-likelihoods	ss	chr7	gencode::PRSS37::ENSG00000165076.9	PRSS37	20	2	0.12801	15.6238	0.00115741	0.721001
log-likelihoods	ss	chr2	gencode::RNASEH1::ENSG00000171865.5	RNASEH1	28	1	0.0806801	12.3946	0.00115926	0.721001
log-likelihoods	ss	chr1	gencode::GSTM2::ENSG00000213366.8	GSTM2	40	1	0.0722643	13.8381	0.00121474	0.721001
log-likelihoods	ss	chr15	gencode::GNB5::ENSG00000069966.14	GNB5	46	2	0.0932764	21.4416	0.00124862	0.721001
log-likelihoods	ss	chr16	gencode::FBXO31::ENSG00000103264.11	FBXO31	32	2	0.0720255	27.7679	0.00125097	0.721001
log-likelihoods	ss	chr10	gencode::CYP17A1::ENSG00000148795.5	CYP17A1	28	2	0.0711362	28.1151	0.00137485	0.751399
log-likelihoods	ss	chr12	gencode::PEX5::ENSG00000139197.6	PEX5	72	2	0.130115	15.3711	0.00144297	0.751399
log-likelihoods	ss	chr8	gencode::ZNF34::ENSG00000196378.7	ZNF34	22	1	0.0438785	22.7902	0.0014602	0.751399
log-likelihoods	ss	chr6	gencode::HLA-DRB1::ENSG00000196126.6	HLA-DRB1	20	2	0.120001	16.6666	0.00153964	0.751399
log-likelihoods	ss	chr2	gencode::EIF4E2::ENSG00000135930.9	EIF4E2	28	2	0.0641077	31.1975	0.00160574	0.751399
log-likelihoods	ss	chr7	gencode::LAMTOR4::ENSG00000188186.6	LAMTOR4	10	1	0.0182246	54.8708	0.00163682	0.751399
log-likelihoods	ss	chr4	gencode::SMAD1::ENSG00000170365.5	SMAD1	28	2	0.115083	17.3788	0.00163799	0.751399
log-likelihoods	ss	chr14	gencode::MIS18BP1::ENSG00000129534.9	MIS18BP1	64	2	0.167257	11.9577	0.00166534	0.751399
log-likelihoods	ss	chr4	gencode::GABRA4::ENSG00000109158.6	GABRA4	32	2	0.165686	12.071	0.00171484	0.751399
log-likelihoods	ss	chr3	gencode::OSBPL11::ENSG00000144909.7	OSBPL11	48	2	0.0897283	22.2895	0.00172426	0.751399
log-likelihoods	ss	chr2	gencode::REG1B::ENSG00000172023.3	REG1B	20	2	0.12243	16.3359	0.00177286	0.754182
log-likelihoods	ss	chr1	gencode::PGLYRP4::ENSG00000163218.10	PGLYRP4	32	2	0.0854243	23.4125	0.00182511	0.758348
log-likelihoods	ss	chr20	gencode::TTPAL::ENSG00000124120.6	TTPAL	22	1	0.043921	22.7682	0.00186754	0.758348
log-likelihoods	ss	chr2	gencode::WDPCP::ENSG00000143951.11	WDPCP	74	2	0.164365	12.168	0.00198201	0.766158
log-likelihoods	ss	chr13	gencode::TMTC4::ENSG00000125247.11	TMTC4	72	2	0.221117	9.04499	0.0020131	0.766158
log-likelihoods	ss	chr5	gencode::APC::ENSG00000134982.12	APC	66	2	0.15092	13.2521	0.00205228	0.766158
log-likelihoods	ss	chr11	gencode::C11orf31::ENSG00000211450.5	C11orf31	12	1	0.0221327	45.182	0.00210856	0.766158
log-likelihoods	ss	chr1	gencode::COPA::ENSG00000122218.10	COPA	128	2	0.162388	12.3162	0.00215445	0.766158
log-likelihoods	ss	chr8	gencode::TNFRSF10B::ENSG00000120889.8	TNFRSF10B	32	1	0.0438925	22.7829	0.00218472	0.766158
log-likelihoods	ss	chr13	gencode::GJA3::ENSG00000121743.3	GJA3	4	1	0.0105695	94.6117	0.00219393	0.766158
log-likelihoods	ss	chr11	gencode::TRIM48::ENSG00000150244.8	TRIM48	20	2	0.125501	15.9362	0.00223298	0.766158
log-likelihoods	ss	chr20	gencode::GHRH::ENSG00000118702.5	GHRH	16	1	0.050414	19.8358	0.00237248	0.766158
log-likelihoods	ss	chr1	gencode::ZNF124::ENSG00000196418.8	ZNF124	16	1	0.0662005	15.1056	0.00239937	0.766158
log-likelihoods	ss	chr1	gencode::SMYD3::ENSG00000185420.14	SMYD3	48	2	0.174838	11.4391	0.00243379	0.766158
log-likelihoods	ss	chr10	gencode::ANKRD16::ENSG00000134461.11	ANKRD16	28	1	0.0434919	22.9928	0.00246038	0.766158
log-likelihoods	ss	chr22	gencode::CELSR1::ENSG00000075275.12	CELSR1	138	3	0.294403	10.1901	0.00253911	0.766158
log-likelihoods	ss	chr7	gencode::ZSCAN21::ENSG00000166529.10	ZSCAN21	18	1	0.0304394	32.8521	0.00254155	0.766158
log-likelihoods	ss	chr16	gencode::SEZ6L2::ENSG00000174938.10	SEZ6L2	68	2	0.111257	17.9764	0.00257901	0.766158
log-likelihoods	ss	chr20	gencode::SYNDIG1::ENSG00000101463.5	SYNDIG1	12	1	0.065911	15.172	0.00260294	0.766158
log-likelihoods	ss	chr7	gencode::TMEM168::ENSG00000146802.8	TMEM168	20	1	0.0629589	15.8834	0.00263098	0.766158
log-likelihoods	ss	chr10	gencode::ACSL5::ENSG00000197142.6	ACSL5	88	2	0.187804	10.6494	0.00266975	0.766158
log-likelihoods	ss	chr14	gencode::FOS::ENSG00000170345.5	FOS	8	1	0.0119612	83.6037	0.00270581	0.766158
log-likelihoods	ss	chr19	gencode::ZNF812::ENSG00000224689.3	ZNF812	16	2	0.0766367	26.0971	0.0027444	0.766158
log-likelihoods	ss	chr15	gencode::C15orf32::ENSG00000183643.2	C15orf32	8	1	0.0405841	24.6402	0.00291119	0.779362
log-likelihoods	ss	chr3	gencode::ARHGAP31::ENSG00000031081.6	ARHGAP31	44	2	0.116018	17.2388	0.0029114	0.779362
log-likelihoods	ss	chr19	gencode::ZFP36::ENSG00000128016.4	ZFP36	4	1	0.0096494	103.633	0.00292255	0.779362
log-likelihoods	ss	chr3	gencode::TMEM45A::ENSG00000181458.6	TMEM45A	28	1	0.0738789	13.5357	0.00296624	0.779379
log-likelihoods	ss	chr7	gencode::KLHDC10::ENSG00000128607.9	KLHDC10	36	2	0.0848275	23.5773	0.00308134	0.797889
log-likelihoods	ss	chr17	gencode::HCRT::ENSG00000161610.1	HCRT	4	1	0.00884751	113.026	0.00324546	0.815905
log-likelihoods	ss	chr17	gencode::SYNGR2::ENSG00000108639.3	SYNGR2	12	1	0.0205965	48.552	0.00329471	0.815905
log-likelihoods	ss	chr11	gencode::C11orf85::ENSG00000168070.7	C11orf85	46	2	0.138038	14.4888	0.00334584	0.815905
log-likelihoods	ss	chr21	gencode::MRAP::ENSG00000170262.8	MRAP	18	1	0.0505694	19.7748	0.00337058	0.815905
log-likelihoods	ss	chr6	gencode::HLA-B::ENSG00000234745.5	HLA-B	28	2	0.103039	19.4102	0.00340999	0.815905
log-likelihoods	ss	chr6	gencode::C6orf223::ENSG00000181577.11	C6orf223	12	1	0.0246999	40.486	0.00342491	0.815905
log-likelihoods	ss	chr2	gencode::B3GALT1::ENSG00000172318.4	B3GALT1	4	1	0.0286991	34.8443	0.00357337	0.817848
log-likelihoods	ss	chr7	gencode::MET::ENSG00000105976.10	MET	82	2	0.176643	11.3223	0.00361325	0.817848
log-likelihoods	ss	chr2	gencode::PID1::ENSG00000153823.14	PID1	14	1	0.0435763	22.9483	0.00366574	0.817848
log-likelihoods	ss	chr10	gencode::PNLIP::ENSG00000175535.6	PNLIP	48	2	0.259777	7.69891	0.0036744	0.817848
log-likelihoods	ss	chr8	gencode::DEFA6::ENSG00000164822.4	DEFA6	4	1	0.0159793	62.5808	0.00372163	0.817848
log-likelihoods	ss	chr4	gencode::LNX1::ENSG00000072201.9	LNX1	42	2	0.106221	18.8287	0.00377146	0.817848
log-likelihoods	ss	chr17	gencode::PDK2::ENSG00000005882.7	PDK2	46	1	0.0826357	12.1013	0.00381882	0.817848
log-likelihoods	ss	chr8	gencode::ARC::ENSG00000198576.2	ARC	8	1	0.0204924	48.7987	0.0038199	0.817848
log-likelihoods	ss	chr16	gencode::KIAA0430::ENSG00000166783.15	KIAA0430	112	2	0.213357	9.37396	0.00391922	0.817848
log-likelihoods	ss	chr17	gencode::RNMTL1::ENSG00000171861.6	RNMTL1	12	1	0.0120076	83.2803	0.00397594	0.817848
log-likelihoods	ss	chr9	gencode::C9orf96::ENSG00000198870.6	C9orf96	70	2	0.125358	15.9543	0.00399445	0.817848
log-likelihoods	ss	chr12	gencode::KCNC2::ENSG00000166006.8	KCNC2	24	2	0.111822	17.8856	0.00409424	0.817848
log-likelihoods	ss	chr1	gencode::RSPO1::ENSG00000169218.9	RSPO1	38	1	0.0948565	10.5422	0.00411012	0.817848
log-likelihoods	ss	chr5	gencode::FBXW11::ENSG00000072803.13	FBXW11	54	2	0.138034	14.4892	0.00411412	0.817848
log-likelihoods	ss	chr18	gencode::MRO::ENSG00000134042.8	MRO	34	2	0.109722	18.228	0.00418922	0.817848
log-likelihoods	ss	chr9	gencode::ARPC5L::ENSG00000136950.9	ARPC5L	20	1	0.0467847	21.3745	0.00419194	0.817848
log-likelihoods	ss	chr10	gencode::WAC::ENSG00000095787.17	WAC	56	2	0.103915	19.2465	0.00428895	0.817848
log-likelihoods	ss	chr18	gencode::GATA6::ENSG00000141448.4	GATA6	24	1	0.0618943	16.1566	0.00429568	0.817848
log-likelihoods	ss	chr1	gencode::EBNA1BP2::ENSG00000117395.6	EBNA1BP2	36	1	0.0724166	13.809	0.00430278	0.817848
log-likelihoods	ss	chr5	gencode::PCDHGB7::ENSG00000254122.1	PCDHGB7	12	1	0.0108278	92.3551	0.00436866	0.821631
log-likelihoods	ss	chr3	gencode::PROK2::ENSG00000163421.4	PROK2	12	1	0.0477949	20.9227	0.00443841	0.826052
log-likelihoods	ss	chr19	gencode::ARHGAP35::ENSG00000160007.13	ARHGAP35	20	1	0.042463	23.5499	0.00461517	0.850095
log-likelihoods	ss	chr1	gencode::TMEM167B::ENSG00000215717.5	TMEM167B	8	1	0.0122765	81.4567	0.00495547	0.889184
log-likelihoods	ss	chr3	gencode::FSTL1::ENSG00000163430.5	FSTL1	40	1	0.0870426	11.4886	0.00504971	0.889184
log-likelihoods	ss	chr8	gencode::GOT1L1::ENSG00000169154.4	GOT1L1	30	2	0.104523	19.1345	0.00513666	0.889184
log-likelihoods	ss	chr14	gencode::VTI1B::ENSG00000100568.6	VTI1B	20	1	0.0349457	28.6159	0.00514232	0.889184
log-likelihoods	ss	chr4	gencode::UGT2A2::ENSG00000271271.1	UGT2A2	20	2	0.126942	15.7553	0.00514271	0.889184
log-likelihoods	ss	chr15	gencode::FBN1::ENSG00000166147.9	FBN1	258	4	0.676312	5.91443	0.00521851	0.889184
log-likelihoods	ss	chr18	gencode::SMAD2::ENSG00000175387.11	SMAD2	40	1	0.0843642	11.8534	0.00522412	0.889184
log-likelihoods	ss	chr17	gencode::MYO1C::ENSG00000197879.10	MYO1C	132	2	0.232965	8.58498	0.00522552	0.889184
log-likelihoods	ss	chr5	gencode::C5orf48::ENSG00000196900.4	C5orf48	8	1	0.0180779	55.3163	0.00554038	0.908611
log-likelihoods	ss	chr1	gencode::UBIAD1::ENSG00000120942.9	UBIAD1	6	1	0.0128654	77.7278	0.00563301	0.908611
log-likelihoods	ss	chr2	gencode::KIF5C::ENSG00000168280.12	KIF5C	104	2	0.374337	5.34277	0.00571588	0.908611
log-likelihoods	ss	chr7	gencode::CPED1::ENSG00000106034.13	CPED1	94	2	0.280869	7.12076	0.00574632	0.908611
log-likelihoods	ss	chr20	gencode::GDAP1L1::ENSG00000124194.11	GDAP1L1	22	1	0.0649738	15.3908	0.00579936	0.908611
log-likelihoods	ss	chr2	gencode::CRYGC::ENSG00000163254.4	CRYGC	8	1	0.0335511	29.8053	0.00580236	0.908611
log-likelihoods	ss	chr6	gencode::EPB41L2::ENSG00000079819.12	EPB41L2	96	2	0.323184	6.18843	0.00580265	0.908611
log-likelihoods	ss	chr2	gencode::LBX2::ENSG00000179528.11	LBX2	6	1	0.00842513	118.692	0.00581324	0.908611
log-likelihoods	ss	chr7	gencode::AC187652.1::ENSG00000269396.1	AC187652.1	22	1	0.186096	5.37357	0.00587252	0.908611
log-likelihoods	ss	chr12	gencode::FAM90A1::ENSG00000171847.6	FAM90A1	24	1	0.0688516	14.524	0.00589646	0.908611
log-likelihoods	ss	chr1	gencode::NEXN::ENSG00000162614.14	NEXN	52	2	0.129182	15.482	0.0059963	0.908611
log-likelihoods	ss	chr14	gencode::THTPA::ENSG00000259431.1	THTPA	8	1	0.012024	83.1671	0.00603319	0.908611
log-likelihoods	ss	chr4	gencode::TRIM61::ENSG00000183439.5	TRIM61	16	1	0.0751056	13.3146	0.0060607	0.908611
log-likelihoods	ss	chr4	gencode::UGT2A1::ENSG00000270386.1	UGT2A1	22	2	0.13679	14.621	0.00611786	0.908611
log-likelihoods	ss	chr11	gencode::TRIM77::ENSG00000214414.5	TRIM77	20	2	0.116552	17.1597	0.00620238	0.908611
log-likelihoods	ss	chr11	gencode::SHANK2::ENSG00000162105.12	SHANK2	130	3	0.439965	6.81872	0.006222	0.908611
log-likelihoods	ss	chr19	gencode::ZNF43::ENSG00000198521.7	ZNF43	38	2	0.187966	10.6402	0.00635517	0.908611
log-likelihoods	ss	chr5	gencode::LHFPL2::ENSG00000145685.9	LHFPL2	18	1	0.0372689	26.832	0.0064109	0.908611
log-likelihoods	ss	chr16	gencode::DNASE1L2::ENSG00000167968.8	DNASE1L2	26	1	0.0855696	11.6864	0.00641756	0.908611
log-likelihoods	ss	chr13	gencode::ARL11::ENSG00000152213.3	ARL11	4	1	0.00891016	112.231	0.0064186	0.908611
log-likelihoods	ss	chr5	gencode::ADAMTS16::ENSG00000145536.11	ADAMTS16	86	2	0.35677	5.60586	0.00642805	0.908611
log-likelihoods	ss	chr9	gencode::ISCA1::ENSG00000135070.9	ISCA1	16	1	0.0365445	27.3639	0.00650925	0.908611
log-likelihoods	ss	chr8	gencode::SLC52A2::ENSG00000185803.4	SLC52A2	26	1	0.0531691	18.8079	0.00650933	0.908611
log-likelihoods	ss	chr22	gencode::APOL4::ENSG00000100336.13	APOL4	26	1	0.0569057	17.5729	0.00659521	0.913462
log-likelihoods	ss	chr4	gencode::LGI2::ENSG00000153012.7	LGI2	28	1	0.0965981	10.3522	0.00665007	0.913975
log-likelihoods	ss	chr3	gencode::SERP1::ENSG00000120742.6	SERP1	10	1	0.0234858	42.5789	0.00679448	0.922013
log-likelihoods	ss	chr15	gencode::EMC4::ENSG00000128463.8	EMC4	20	1	0.0290763	34.3923	0.00691766	0.922013
log-likelihoods	ss	chr14	gencode::RAD51B::ENSG00000182185.14	RAD51B	50	2	0.134025	14.9226	0.00694506	0.922013
log-likelihoods	ss	chr4	gencode::PTPN13::ENSG00000163629.8	PTPN13	190	3	0.51577	5.81655	0.00696658	0.922013
log-likelihoods	ss	chr12	gencode::RDH5::ENSG00000135437.5	RDH5	18	1	0.0456469	21.9073	0.00697413	0.922013
log-likelihoods	ss	chr6	gencode::ZNF165::ENSG00000197279.3	ZNF165	12	1	0.0454241	22.0147	0.00701818	0.922013
log-likelihoods	ss	chr15	gencode::GALK2::ENSG00000156958.10	GALK2	52	1	0.107933	9.26503	0.00733903	0.934644
log-likelihoods	ss	chr8	gencode::SNAI2::ENSG00000019549.4	SNAI2	12	1	0.032081	31.1711	0.00735505	0.934644
log-likelihoods	ss	chr1	gencode::SMG5::ENSG00000198952.7	SMG5	86	2	0.14221	14.0638	0.00737182	0.934644
log-likelihoods	ss	chr1	gencode::MRPL55::ENSG00000162910.14	MRPL55	32	1	0.0627515	15.9359	0.00745107	0.934644
log-likelihoods	ss	chr6	gencode::KLHDC3::ENSG00000124702.13	KLHDC3	40	1	0.066735	14.9846	0.00750288	0.934644
log-likelihoods	ss	chr20	gencode::WFDC13::ENSG00000168634.4	WFDC13	12	1	0.042144	23.7282	0.00753428	0.934644
log-likelihoods	ss	chr11	gencode::CREBZF::ENSG00000137504.9	CREBZF	12	1	0.0241169	41.4648	0.00754531	0.934644
log-likelihoods	ss	chr11	gencode::ACP2::ENSG00000134575.5	ACP2	42	1	0.0568864	17.5789	0.0075958	0.934644
log-likelihoods	ss	chr17	gencode::CDR2L::ENSG00000109089.7	CDR2L	16	1	0.0317991	31.4474	0.00765037	0.934644
log-likelihoods	ss	chr11	gencode::BCL9L::ENSG00000186174.8	BCL9L	28	1	0.0550645	18.1605	0.00766008	0.934644
log-likelihoods	ss	chr17	gencode::ZACN::ENSG00000186919.8	ZACN	34	1	0.0621465	16.091	0.00773657	0.934644
log-likelihoods	ss	chr19	gencode::KHSRP::ENSG00000088247.11	KHSRP	76	2	0.141848	14.0996	0.00774206	0.934644
log-likelihoods	ss	chr17	gencode::CDC6::ENSG00000094804.5	CDC6	44	1	0.0791881	12.6282	0.00791712	0.949364
log-likelihoods	ss	chr5	gencode::ZSWIM6::ENSG00000130449.5	ZSWIM6	52	1	0.122568	8.15876	0.00798921	0.949652
log-likelihoods	ss	chr22	gencode::VPREB1::ENSG00000169575.4	VPREB1	4	1	0.019067	52.4467	0.00803045	0.949652
log-likelihoods	ss	chr17	gencode::ACBD4::ENSG00000181513.10	ACBD4	50	1	0.118814	8.41655	0.00807898	0.949652
log-likelihoods	ss	chr10	gencode::PITRM1::ENSG00000107959.11	PITRM1	102	2	0.251017	7.9676	0.00824401	0.962118
log-likelihoods	ss	chr2	gencode::ABCG8::ENSG00000143921.6	ABCG8	48	2	0.152022	13.156	0.00836506	0.962118
log-likelihoods	ss	chr11	gencode::SCGB1D4::ENSG00000197745.1	SCGB1D4	8	1	0.0244526	40.8955	0.00845651	0.962118
log-likelihoods	ss	chr2	gencode::ATP6V1B1::ENSG00000116039.7	ATP6V1B1	52	2	0.190499	10.4987	0.00847462	0.962118
log-likelihoods	ss	chr20	gencode::TMEM74B::ENSG00000125895.5	TMEM74B	4	1	0.0105961	94.3743	0.00871556	0.962118
log-likelihoods	ss	chr10	gencode::LRRC18::ENSG00000165383.6	LRRC18	6	1	0.0257526	38.8311	0.0087436	0.962118
log-likelihoods	ss	chr17	gencode::SNX11::ENSG00000002919.10	SNX11	32	1	0.0621779	16.0829	0.00881608	0.962118
log-likelihoods	ss	chr9	gencode::TSC1::ENSG00000165699.9	TSC1	86	2	0.210028	9.52253	0.00883694	0.962118
log-likelihoods	ss	chr3	gencode::EPHA3::ENSG00000044524.6	EPHA3	62	1	0.210745	4.74507	0.00888896	0.962118
log-likelihoods	ss	chr19	gencode::ZNF98::ENSG00000197360.5	ZNF98	14	1	0.0805158	12.4199	0.00889716	0.962118
log-likelihoods	ss	chr5	gencode::SPDL1::ENSG00000040275.12	SPDL1	44	1	0.134441	7.43822	0.00890703	0.962118
log-likelihoods	ss	chr17	gencode::ARHGAP27::ENSG00000159314.7	ARHGAP27	82	2	0.169983	11.7659	0.00898131	0.962118
log-likelihoods	ss	chr6	gencode::LY6G6D::ENSG00000244355.3	LY6G6D	8	1	0.0306761	32.5986	0.00901686	0.962118
log-likelihoods	ss	chr16	gencode::FA2H::ENSG00000103089.4	FA2H	24	1	0.049177	20.3347	0.00902981	0.962118
log-likelihoods	ss	chr8	gencode::GRHL2::ENSG00000083307.6	GRHL2	62	2	0.148413	13.4759	0.00912777	0.962118
log-likelihoods	ss	chr16	gencode::RBBP6::ENSG00000122257.14	RBBP6	66	2	0.143389	13.9481	0.00914968	0.962118
log-likelihoods	ss	chr5	gencode::LMAN2::ENSG00000169223.10	LMAN2	28	1	0.0480638	20.8057	0.00926143	0.962118
log-likelihoods	ss	chr4	gencode::UGT2A1::ENSG00000173610.7	UGT2A1	28	2	0.168765	11.8508	0.0093157	0.962118
log-likelihoods	ss	chr2	gencode::RPL31::ENSG00000071082.6	RPL31	16	1	0.0282415	35.4088	0.00932423	0.962118
log-likelihoods	ss	chr6	gencode::RPS12::ENSG00000112306.7	RPS12	20	1	0.0385018	25.9728	0.00945105	0.962118
log-likelihoods	ss	chr1	gencode::HHLA3::ENSG00000197568.9	HHLA3	14	1	0.0409278	24.4332	0.00949295	0.962118
log-likelihoods	ss	chr5	gencode::CD14::ENSG00000170458.9	CD14	8	1	0.0160062	62.4759	0.00955315	0.962118
log-likelihoods	ss	chr12	gencode::VAMP1::ENSG00000139190.12	VAMP1	18	1	0.0287891	34.7354	0.00955435	0.962118
log-likelihoods	ss	chr18	gencode::SOCS6::ENSG00000170677.5	SOCS6	6	1	0.014035	71.2506	0.00956591	0.962118
log-likelihoods	ss	chr5	gencode::CAPSL::ENSG00000152611.7	CAPSL	16	1	0.0646457	15.4689	0.0096186	0.962118
log-likelihoods	ss	chr1	gencode::DEDD::ENSG00000158796.12	DEDD	24	1	0.0276756	36.1328	0.00962129	0.962118
log-likelihoods	ss	chr17	gencode::TMEM100::ENSG00000166292.7	TMEM100	12	1	0.0328066	30.4817	0.00963895	0.962118
log-likelihoods	ss	chr13	gencode::TRPC4::ENSG00000133107.10	TRPC4	40	2	0.161931	12.3509	0.00972561	0.965375
log-likelihoods	ss	chr4	gencode::PDLIM5::ENSG00000163110.10	PDLIM5	88	2	0.163427	12.2379	0.00993683	0.973674
log-likelihoods	ss	chr14	gencode::ISM2::ENSG00000100593.13	ISM2	28	1	0.0813193	12.2972	0.00998758	0.973674
log-likelihoods	ss	chr2	gencode::MAP3K2::ENSG00000169967.12	MAP3K2	64	1	0.125738	7.95305	0.0101744	0.973674
log-likelihoods	ss	chr20	gencode::RBPJL::ENSG00000124232.6	RBPJL	44	1	0.125176	7.98875	0.0102235	0.973674
log-likelihoods	ss	chr11	gencode::CLCF1::ENSG00000175505.9	CLCF1	10	1	0.0125531	79.6615	0.0103095	0.973674
log-likelihoods	ss	chr10	gencode::UBE2D1::ENSG00000072401.10	UBE2D1	24	1	0.0501404	19.944	0.0103322	0.973674
log-likelihoods	ss	chr1	gencode::LMO4::ENSG00000143013.8	LMO4	18	1	0.0457121	21.876	0.0104817	0.973674
log-likelihoods	ss	chr4	gencode::CXCL11::ENSG00000169248.8	CXCL11	16	1	0.0302946	33.0092	0.0105067	0.973674
log-likelihoods	ss	chr6	gencode::MTHFD1L::ENSG00000120254.11	MTHFD1L	110	2	0.254082	7.87146	0.0105124	0.973674
log-likelihoods	ss	chr3	gencode::HYAL1::ENSG00000114378.12	HYAL1	22	1	0.0406512	24.5995	0.0105908	0.973674
log-likelihoods	ss	chr2	gencode::RAB11FIP5::ENSG00000135631.11	RAB11FIP5	16	1	0.0325088	30.7609	0.0106641	0.973674
log-likelihoods	ss	chr7	gencode::ZNF786::ENSG00000197362.9	ZNF786	16	1	0.0344021	29.068	0.0107043	0.973674
log-likelihoods	ss	chr7	gencode::COPG2::ENSG00000158623.10	COPG2	32	1	0.0516351	19.3667	0.0107867	0.973674
log-likelihoods	ss	chr5	gencode::NLN::ENSG00000123213.18	NLN	48	1	0.0950591	10.5198	0.0107922	0.973674
log-likelihoods	ss	chr3	gencode::CCDC58::ENSG00000160124.5	CCDC58	18	1	0.0406011	24.6298	0.0108062	0.973674
log-likelihoods	ss	chr6	gencode::GMDS::ENSG00000112699.6	GMDS	42	1	0.0687954	14.5359	0.0110017	0.973674
log-likelihoods	ss	chr5	gencode::EIF4E1B::ENSG00000175766.7	EIF4E1B	36	1	0.122594	8.15698	0.011047	0.973674
log-likelihoods	ss	chr1	gencode::KHDRBS1::ENSG00000121774.13	KHDRBS1	32	1	0.0525655	19.0239	0.0111391	0.973674
log-likelihoods	ss	chr16	gencode::CBFB::ENSG00000067955.9	CBFB	22	1	0.0472081	21.1828	0.0112115	0.973674
log-likelihoods	ss	chr6	gencode::KHDC1::ENSG00000135314.8	KHDC1	18	1	0.0549925	18.1843	0.0112265	0.973674
log-likelihoods	ss	chr15	gencode::PRTG::ENSG00000166450.8	PRTG	78	2	0.190179	10.5164	0.0113964	0.973674
log-likelihoods	ss	chr17	gencode::RP11-385D13.1::ENSG00000251537.4	RP11-385D13.1	62	2	0.220531	9.06901	0.0114291	0.973674
log-likelihoods	ss	chr5	gencode::SQSTM1::ENSG00000161011.15	SQSTM1	34	1	0.0442389	22.6046	0.0114781	0.973674
log-likelihoods	ss	chr3	gencode::C3orf72::ENSG00000206262.4	C3orf72	8	1	0.0281297	35.5496	0.0114816	0.973674
log-likelihoods	ss	chr11	gencode::MRPL17::ENSG00000158042.8	MRPL17	8	1	0.0165388	60.464	0.0114836	0.973674
log-likelihoods	ss	chr7	gencode::SEMA3C::ENSG00000075223.9	SEMA3C	72	2	0.176188	11.3515	0.0116022	0.973674
log-likelihoods	ss	chr2	gencode::POLE4::ENSG00000115350.7	POLE4	12	1	0.0320569	31.1945	0.0116201	0.973674
log-likelihoods	ss	chr1	gencode::JAK1::ENSG00000162434.7	JAK1	96	2	0.16399	12.1959	0.0116643	0.973674
log-likelihoods	ss	chr3	gencode::BTD::ENSG00000169814.8	BTD	24	1	0.0554514	18.0338	0.0117718	0.973674
log-likelihoods	ss	chr19	gencode::PGLS::ENSG00000130313.2	PGLS	16	1	0.0312032	32.048	0.0118107	0.973674
log-likelihoods	ss	chr3	gencode::LZTFL1::ENSG00000163818.12	LZTFL1	46	1	0.112513	8.88789	0.011828	0.973674
log-likelihoods	ss	chr10	gencode::PDCD4::ENSG00000150593.11	PDCD4	48	1	0.0754917	13.2465	0.0118349	0.973674
log-likelihoods	ss	chr7	gencode::WNT16::ENSG00000002745.8	WNT16	14	1	0.0443561	22.5448	0.0118512	0.973674
log-likelihoods	ss	chr13	gencode::SACS::ENSG00000151835.9	SACS	38	1	0.122928	8.13486	0.0118687	0.973674
log-likelihoods	ss	chr14	gencode::WDHD1::ENSG00000198554.7	WDHD1	100	2	0.206586	9.68121	0.0118791	0.973674
log-likelihoods	ss	chr15	gencode::MYO5A::ENSG00000197535.10	MYO5A	170	2	0.352692	5.67067	0.011907	0.973674
log-likelihoods	ss	chr11	gencode::IL10RA::ENSG00000110324.5	IL10RA	28	1	0.086861	11.5126	0.0119507	0.973674
log-likelihoods	ss	chr3	gencode::HTR3C::ENSG00000178084.1	HTR3C	32	1	0.0991643	10.0843	0.0119639	0.973674
log-likelihoods	ss	chr17	gencode::RPH3AL::ENSG00000181031.11	RPH3AL	36	1	0.0388971	25.7089	0.0120582	0.973674
log-likelihoods	ss	chr16	gencode::LCMT1::ENSG00000205629.7	LCMT1	40	1	0.094649	10.5654	0.0121676	0.973674
log-likelihoods	ss	chr19	gencode::SUGP1::ENSG00000105705.11	SUGP1	54	1	0.118523	8.43715	0.0122859	0.973674
log-likelihoods	ss	chr12	gencode::COL2A1::ENSG00000139219.13	COL2A1	212	3	0.56065	5.35093	0.0122924	0.973674
log-likelihoods	ss	chr22	gencode::MIEF1::ENSG00000100335.8	MIEF1	28	1	0.0592277	16.884	0.0123236	0.973674
log-likelihoods	ss	chr1	gencode::TARS2::ENSG00000143374.10	TARS2	68	1	0.129024	7.7505	0.0124212	0.973674
log-likelihoods	ss	chr11	gencode::CDCA5::ENSG00000146670.5	CDCA5	24	1	0.0515864	19.3849	0.0124616	0.973674
log-likelihoods	ss	chr19	gencode::TLE2::ENSG00000065717.10	TLE2	92	2	0.2079	9.62002	0.0124749	0.973674
log-likelihoods	ss	chr8	gencode::UBE2W::ENSG00000104343.15	UBE2W	26	1	0.0801928	12.4699	0.0124768	0.973674
log-likelihoods	ss	chr1	gencode::USP48::ENSG00000090686.11	USP48	100	2	0.192952	10.3653	0.0125097	0.973674
log-likelihoods	ss	chr3	gencode::RFTN1::ENSG00000131378.9	RFTN1	38	1	0.103609	9.6517	0.0125281	0.973674
log-likelihoods	ss	chr20	gencode::EIF6::ENSG00000242372.2	EIF6	20	1	0.0322637	30.9946	0.0126849	0.973674
log-likelihoods	ss	chr11	gencode::SC5D::ENSG00000109929.5	SC5D	18	1	0.0534084	18.7236	0.0127474	0.973674
log-likelihoods	ss	chr6	gencode::CNKSR3::ENSG00000153721.13	CNKSR3	52	1	0.158266	6.31848	0.0129085	0.973674
log-likelihoods	ss	chr22	gencode::NCAPH2::ENSG00000025770.14	NCAPH2	70	1	0.08591	11.6401	0.0129239	0.973674
log-likelihoods	ss	chr17	gencode::STRA13::ENSG00000169689.10	STRA13	16	1	0.0283358	35.2911	0.012969	0.973674
log-likelihoods	ss	chr17	gencode::MAP2K4::ENSG00000065559.10	MAP2K4	44	1	0.127749	7.82786	0.0130105	0.973674
log-likelihoods	ss	chr17	gencode::EIF1::ENSG00000173812.6	EIF1	14	1	0.0321703	31.0846	0.0130369	0.973674
log-likelihoods	ss	chr3	gencode::TOPBP1::ENSG00000163781.8	TOPBP1	108	2	0.224222	8.91975	0.0130767	0.973674
log-likelihoods	ss	chr8	gencode::OSR2::ENSG00000164920.5	OSR2	14	1	0.0355722	28.1119	0.0130886	0.973674
log-likelihoods	ss	chr7	gencode::PILRB::ENSG00000121716.14	PILRB	68	1	0.0917355	10.9009	0.0132039	0.973674
log-likelihoods	ss	chr3	gencode::CNTN3::ENSG00000113805.8	CNTN3	84	2	0.348594	5.73734	0.0132282	0.973674
log-likelihoods	ss	chr7	gencode::ZNF679::ENSG00000197123.5	ZNF679	16	1	0.0995328	10.0469	0.0132652	0.973674
log-likelihoods	ss	chr8	gencode::ENY2::ENSG00000120533.8	ENY2	24	1	0.0791144	12.6399	0.0133831	0.973674
log-likelihoods	ss	chr7	gencode::ATP6V1F::ENSG00000128524.4	ATP6V1F	8	1	0.0134885	74.1374	0.01344	0.973674
log-likelihoods	ss	chr8	gencode::TMEM64::ENSG00000180694.9	TMEM64	22	1	0.0954345	10.4784	0.0134966	0.973674
log-likelihoods	ss	chr7	gencode::VWDE::ENSG00000146530.7	VWDE	112	2	0.470394	4.25176	0.0135732	0.973674
log-likelihoods	ss	chr12	gencode::KLRG1::ENSG00000139187.5	KLRG1	18	1	0.0486567	20.5522	0.0136092	0.973674
log-likelihoods	ss	chr1	gencode::CD46::ENSG00000117335.14	CD46	52	1	0.0955619	10.4644	0.0136606	0.973674
log-likelihoods	ss	chr4	gencode::PDE6B::ENSG00000133256.8	PDE6B	86	2	0.269731	7.41481	0.0136936	0.973674
log-likelihoods	ss	chr10	gencode::CALY::ENSG00000130643.4	CALY	22	1	0.0623648	16.0347	0.0137814	0.973674
log-likelihoods	ss	chr1	gencode::EIF3I::ENSG00000084623.7	EIF3I	40	1	0.073411	13.6219	0.0137959	0.973674
log-likelihoods	ss	chr12	gencode::FGF6::ENSG00000111241.2	FGF6	8	1	0.031151	32.1017	0.0137967	0.973674
log-likelihoods	ss	chr19	gencode::ZNF548::ENSG00000188785.7	ZNF548	10	1	0.0307374	32.5336	0.013799	0.973674
log-likelihoods	ss	chr4	gencode::RASSF6::ENSG00000169435.9	RASSF6	46	2	0.185123	10.8036	0.0138128	0.973674
log-likelihoods	ss	chr2	gencode::GIGYF2::ENSG00000204120.10	GIGYF2	126	2	0.247542	8.07943	0.0138419	0.973674
log-likelihoods	ss	chr20	gencode::SLC4A11::ENSG00000088836.8	SLC4A11	76	1	0.169381	5.90385	0.0140366	0.976451
log-likelihoods	ss	chr10	gencode::WBP1L::ENSG00000166272.12	WBP1L	14	1	0.0220632	45.3243	0.0140383	0.976451
log-likelihoods	ss	chr17	gencode::C17orf112::ENSG00000227011.1	C17orf112	12	1	0.0841454	11.8842	0.0140708	0.976451
log-likelihoods	ss	chr3	gencode::FAM19A4::ENSG00000163377.10	FAM19A4	20	1	0.0960667	10.4094	0.0141259	0.976451
log-likelihoods	ss	chr20	gencode::NTSR1::ENSG00000101188.4	NTSR1	12	1	0.054368	18.3932	0.0141995	0.976451
log-likelihoods	ss	chr5	gencode::COL23A1::ENSG00000050767.11	COL23A1	118	2	0.294301	6.79576	0.0142093	0.976451
log-likelihoods	ss	chr10	gencode::ANKRD30A::ENSG00000148513.13	ANKRD30A	168	4	1.1792	3.39214	0.0143039	0.979188
log-likelihoods	ss	chr8	gencode::COLEC10::ENSG00000184374.2	COLEC10	20	1	0.0577243	17.3237	0.0144104	0.982714
log-likelihoods	ss	chr16	gencode::SYNGR3::ENSG00000127561.10	SYNGR3	12	1	0.021599	46.2984	0.0146106	0.992576
log-likelihoods	ss	chr1	gencode::SH3D21::ENSG00000214193.5	SH3D21	60	1	0.118307	8.45256	0.0147372	0.997017
log-likelihoods	ss	chr6	gencode::EYA4::ENSG00000112319.13	EYA4	86	2	0.231237	8.64913	0.01487	0.997017
log-likelihoods	ss	chr5	gencode::PRDM9::ENSG00000164256.5	PRDM9	40	2	0.272717	7.33361	0.014878	0.997017
log-likelihoods	ss	chr14	gencode::ZFYVE26::ENSG00000072121.11	ZFYVE26	160	2	0.306645	6.5222	0.0149311	0.997017
log-likelihoods	ss	chr10	gencode::ANXA7::ENSG00000138279.11	ANXA7	48	1	0.0871266	11.4776	0.0149926	0.997017
log-likelihoods	ss	chr19	gencode::C19orf77::ENSG00000095932.5	C19orf77	12	1	0.021555	46.393	0.0150108	0.997017
log-likelihoods	ss	chr1	gencode::KIAA0040::ENSG00000235750.5	KIAA0040	14	1	0.0443814	22.5319	0.0151327	0.999745
log-likelihoods	ss	chr4	gencode::TMPRSS11B::ENSG00000185873.7	TMPRSS11B	36	2	0.196424	10.182	0.0152289	0.999745
log-likelihoods	ss	chr3	gencode::SLC35G2::ENSG00000168917.8	SLC35G2	6	1	0.0153047	65.3396	0.0152364	0.999745
log-likelihoods	ss	chr11	gencode::HRAS::ENSG00000174775.12	HRAS	26	1	0.0477577	20.939	0.01528	0.999745
log-likelihoods	ss	chr20	gencode::AURKA::ENSG00000087586.13	AURKA	42	1	0.11639	8.5918	0.0154157	0.999745
log-likelihoods	ss	chr7	gencode::MEST::ENSG00000106484.10	MEST	50	1	0.077658	12.877	0.0154247	0.999745
log-likelihoods	ss	chr1	gencode::NPPB::ENSG00000120937.8	NPPB	8	1	0.0182294	54.8563	0.0154435	0.999745
log-likelihoods	ss	chr12	gencode::AGAP2::ENSG00000135439.7	AGAP2	64	1	0.143066	6.98979	0.0155393	1
log-likelihoods	ss	chr19	gencode::CD320::ENSG00000167775.6	CD320	16	1	0.0261218	38.2822	0.0157742	1
log-likelihoods	ss	chr7	gencode::SRRM3::ENSG00000177679.14	SRRM3	60	1	0.120867	8.27358	0.0162872	1
log-likelihoods	ss	chr20	gencode::NNAT::ENSG00000053438.7	NNAT	8	1	0.0184664	54.1524	0.0163047	1
log-likelihoods	ss	chr19	gencode::AC003002.4::ENSG00000268133.1	AC003002.4	12	1	0.0337544	29.6258	0.0163293	1
log-likelihoods	ss	chr7	gencode::PDAP1::ENSG00000106244.8	PDAP1	20	1	0.027074	36.9358	0.0163649	1
log-likelihoods	ss	chr2	gencode::RESP18::ENSG00000182698.7	RESP18	28	1	0.104404	9.57815	0.0163892	1
log-likelihoods	ss	chr21	gencode::C21orf90::ENSG00000182912.6	C21orf90	8	1	0.021943	45.5726	0.0165447	1
log-likelihoods	ss	chr18	gencode::SERPINB4::ENSG00000206073.6	SERPINB4	28	1	0.083776	11.9366	0.0165753	1
log-likelihoods	ss	chr17	gencode::JMJD6::ENSG00000070495.10	JMJD6	22	1	0.036619	27.3082	0.0165854	1
log-likelihoods	ss	chr7	gencode::CEP41::ENSG00000106477.14	CEP41	42	1	0.0858455	11.6488	0.0166471	1
log-likelihoods	ss	chr12	gencode::TMEM19::ENSG00000139291.9	TMEM19	18	1	0.0374542	26.6993	0.0166893	1
log-likelihoods	ss	chr11	gencode::LMO2::ENSG00000135363.7	LMO2	20	1	0.0469735	21.2886	0.0167536	1
log-likelihoods	ss	chr17	gencode::TMEM220::ENSG00000187824.4	TMEM220	20	1	0.0682552	14.6509	0.0167823	1
log-likelihoods	ss	chr15	gencode::SPATA8::ENSG00000185594.4	SPATA8	10	1	0.0728018	13.7359	0.0167862	1
log-likelihoods	ss	chr12	gencode::SLCO1B3::ENSG00000111700.8	SLCO1B3	70	2	0.29049	6.88493	0.0168534	1
log-likelihoods	ss	chr14	gencode::NUDT14::ENSG00000183828.10	NUDT14	16	1	0.0297865	33.5722	0.0169423	1
log-likelihoods	ss	chr12	gencode::ACSS3::ENSG00000111058.3	ACSS3	60	2	0.292756	6.83162	0.0169575	1
log-likelihoods	ss	chr7	gencode::SEC61G::ENSG00000132432.9	SEC61G	20	1	0.0465498	21.4824	0.0169976	1
log-likelihoods	ss	chr16	gencode::GLIS2::ENSG00000126603.4	GLIS2	28	1	0.0509734	19.6181	0.0170796	1
log-likelihoods	ss	chr4	gencode::CEP135::ENSG00000174799.6	CEP135	98	2	0.243566	8.21131	0.0170882	1
log-likelihoods	ss	chr19	gencode::HAMP::ENSG00000105697.3	HAMP	12	1	0.0408465	24.4819	0.0170915	1
log-likelihoods	ss	chr1	gencode::PTPN7::ENSG00000143851.11	PTPN7	38	1	0.0774548	12.9108	0.0171276	1
log-likelihoods	ss	chr14	gencode::FBLN5::ENSG00000140092.10	FBLN5	46	1	0.136069	7.3492	0.0171555	1
log-likelihoods	ss	chr3	gencode::KPNA4::ENSG00000186432.4	KPNA4	64	1	0.152389	6.56215	0.0172109	1
log-likelihoods	ss	chr5	gencode::PJA2::ENSG00000198961.5	PJA2	36	1	0.085732	11.6643	0.0172383	1
log-likelihoods	ss	chr10	gencode::TET1::ENSG00000138336.8	TET1	44	1	0.0903794	11.0645	0.0173157	1
log-likelihoods	ss	chr17	gencode::MED31::ENSG00000108590.6	MED31	14	1	0.0190353	52.5339	0.0174054	1
log-likelihoods	ss	chr7	gencode::TES::ENSG00000135269.13	TES	26	1	0.0514897	19.4213	0.0174869	1
log-likelihoods	ss	chr19	gencode::SYMPK::ENSG00000125755.14	SYMPK	104	1	0.17818	5.61232	0.0176028	1
log-likelihoods	ss	chr20	gencode::MTG2::ENSG00000101181.13	MTG2	24	1	0.04959	20.1653	0.0176424	1
log-likelihoods	ss	chr15	gencode::LEO1::ENSG00000166477.8	LEO1	44	1	0.0897239	11.1453	0.0178886	1
log-likelihoods	ss	chr16	gencode::RNF40::ENSG00000103549.17	RNF40	78	1	0.0886204	11.2841	0.0179758	1
log-likelihoods	ss	chr1	gencode::C1orf222::ENSG00000142609.13	C1orf222	16	1	0.0405379	24.6683	0.0181419	1
log-likelihoods	ss	chr17	gencode::CBX4::ENSG00000141582.10	CBX4	16	1	0.0335144	29.8379	0.0181686	1
log-likelihoods	ss	chr17	gencode::CCDC137::ENSG00000185298.8	CCDC137	20	1	0.0473662	21.1121	0.0181687	1
log-likelihoods	ss	chr19	gencode::PSMD8::ENSG00000099341.7	PSMD8	24	1	0.0465402	21.4868	0.0183066	1
log-likelihoods	ss	chr8	gencode::DPY19L4::ENSG00000156162.12	DPY19L4	72	1	0.195905	5.10452	0.0183308	1
log-likelihoods	ss	chr2	gencode::MYO7B::ENSG00000169994.14	MYO7B	186	2	0.410283	4.87468	0.0185207	1
log-likelihoods	ss	chr12	gencode::PZP::ENSG00000126838.5	PZP	138	2	0.398677	5.0166	0.018539	1
log-likelihoods	ss	chr10	gencode::ITIH5::ENSG00000123243.10	ITIH5	58	1	0.165724	6.03412	0.0188692	1
log-likelihoods	ss	chr2	gencode::SLC30A6::ENSG00000152683.10	SLC30A6	58	1	0.127993	7.81293	0.0189581	1
log-likelihoods	ss	chr17	gencode::CHMP6::ENSG00000176108.5	CHMP6	28	1	0.0588038	17.0057	0.0189681	1
log-likelihoods	ss	chr3	gencode::MITF::ENSG00000187098.10	MITF	42	1	0.10812	9.24895	0.0190375	1
log-likelihoods	ss	chr1	gencode::UBE2U::ENSG00000177414.9	UBE2U	32	1	0.102063	9.79787	0.0190574	1
log-likelihoods	ss	chr20	gencode::ZBTB46::ENSG00000130584.6	ZBTB46	24	1	0.0496081	20.158	0.0192478	1
log-likelihoods	ss	chr8	gencode::SNTG1::ENSG00000147481.9	SNTG1	78	2	0.479707	4.16922	0.0192842	1
log-likelihoods	ss	chr7	gencode::RNF32::ENSG00000105982.12	RNF32	46	1	0.151801	6.58758	0.0193647	1
log-likelihoods	ss	chr19	gencode::HOMER3::ENSG00000051128.14	HOMER3	40	1	0.0667654	14.9778	0.0195124	1
log-likelihoods	ss	chr17	gencode::B3GNTL1::ENSG00000175711.4	B3GNTL1	52	1	0.175904	5.68491	0.0195511	1
log-likelihoods	ss	chr17	gencode::GPS2::ENSG00000132522.11	GPS2	40	1	0.0707898	14.1263	0.0196571	1
log-likelihoods	ss	chr10	gencode::HABP2::ENSG00000148702.10	HABP2	54	1	0.192586	5.19247	0.0196689	1
log-likelihoods	ss	chr5	gencode::VCAN::ENSG00000038427.11	VCAN	54	1	0.163279	6.12449	0.0197417	1
log-likelihoods	ss	chr17	gencode::EIF5A::ENSG00000132507.13	EIF5A	26	1	0.0372069	26.8768	0.0198331	1
log-likelihoods	ss	chr10	gencode::GSTO1::ENSG00000148834.8	GSTO1	22	1	0.0437121	22.8769	0.0199102	1
log-likelihoods	ss	chr19	gencode::ZNF329::ENSG00000181894.10	ZNF329	12	1	0.0562247	17.7858	0.0199107	1
log-likelihoods	ss	chr9	gencode::PTGES2::ENSG00000148334.10	PTGES2	30	1	0.0640872	15.6037	0.0199535	1
log-likelihoods	ss	chr19	gencode::KLK15::ENSG00000174562.9	KLK15	20	1	0.0746789	13.3907	0.0200386	1
log-likelihoods	ss	chr7	gencode::PIK3CG::ENSG00000105851.6	PIK3CG	44	1	0.151663	6.59357	0.0202108	1
log-likelihoods	ss	chr7	gencode::AC068533.7::ENSG00000249319.1	AC068533.7	44	1	0.0950998	10.5153	0.0202849	1
log-likelihoods	ss	chr12	gencode::TPH2::ENSG00000139287.8	TPH2	40	1	0.186156	5.37183	0.020288	1
log-likelihoods	ss	chr3	gencode::KIF9::ENSG00000088727.8	KIF9	90	1	0.148927	6.71469	0.0202958	1
log-likelihoods	ss	chr10	gencode::TFAM::ENSG00000108064.6	TFAM	24	1	0.053047	18.8512	0.0203314	1
log-likelihoods	ss	chr7	gencode::GCK::ENSG00000106633.11	GCK	42	1	0.10473	9.54833	0.0204358	1
log-likelihoods	ss	chr9	gencode::PRSS3::ENSG00000010438.12	PRSS3	24	1	0.0684813	14.6025	0.0205213	1
log-likelihoods	ss	chr19	gencode::PRRG2::ENSG00000126460.6	PRRG2	24	1	0.0448793	22.282	0.0205617	1
log-likelihoods	ss	chr16	gencode::ADCY7::ENSG00000121281.8	ADCY7	106	2	0.246119	8.12614	0.0206118	1
log-likelihoods	ss	chr20	gencode::EPB41L1::ENSG00000088367.16	EPB41L1	98	1	0.179309	5.57695	0.0206225	1
log-likelihoods	ss	chr1	gencode::RCSD1::ENSG00000198771.6	RCSD1	24	1	0.0658474	15.1866	0.0206468	1
log-likelihoods	ss	chr10	gencode::ANKRD22::ENSG00000152766.5	ANKRD22	20	1	0.0395233	25.3015	0.0206506	1
log-likelihoods	ss	chr5	gencode::EDIL3::ENSG00000164176.8	EDIL3	40	1	0.148885	6.71661	0.0206972	1
log-likelihoods	ss	chr7	gencode::PTPRN2::ENSG00000155093.13	PTPRN2	90	2	0.354212	5.64634	0.0207277	1
log-likelihoods	ss	chr6	gencode::VNN2::ENSG00000112303.9	VNN2	26	1	0.0807769	12.3798	0.0207821	1
log-likelihoods	ss	chr10	gencode::MYOZ1::ENSG00000177791.11	MYOZ1	20	1	0.0440447	22.7042	0.020838	1
log-likelihoods	ss	chr22	gencode::SEZ6L::ENSG00000100095.14	SEZ6L	64	2	0.258833	7.72699	0.0209305	1
log-likelihoods	ss	chr9	gencode::SHC3::ENSG00000148082.5	SHC3	46	1	0.179804	5.56161	0.0209305	1
log-likelihoods	ss	chr12	gencode::CLEC9A::ENSG00000197992.2	CLEC9A	32	1	0.10079	9.92164	0.0209952	1
log-likelihoods	ss	chr2	gencode::MAT2A::ENSG00000168906.8	MAT2A	32	1	0.0430107	23.25	0.0210405	1
log-likelihoods	ss	chr4	gencode::MED28::ENSG00000118579.7	MED28	12	1	0.0372183	26.8685	0.0212195	1
log-likelihoods	ss	chr2	gencode::PCDP1::ENSG00000163075.8	PCDP1	98	2	0.3441	5.81226	0.0212512	1
log-likelihoods	ss	chr5	gencode::PIK3R1::ENSG00000145675.10	PIK3R1	68	1	0.186682	5.35669	0.0212924	1
log-likelihoods	ss	chr16	gencode::CIAPIN1::ENSG00000005194.10	CIAPIN1	32	1	0.0486871	20.5393	0.0212942	1
log-likelihoods	ss	chr4	gencode::WDR1::ENSG00000071127.12	WDR1	56	1	0.211851	4.72029	0.0213142	1
log-likelihoods	ss	chr17	gencode::UTP6::ENSG00000108651.5	UTP6	72	1	0.155464	6.43235	0.0214319	1
log-likelihoods	ss	chr14	gencode::KIAA0586::ENSG00000100578.10	KIAA0586	132	2	0.238407	8.38901	0.0214476	1
log-likelihoods	ss	chr7	gencode::ESYT2::ENSG00000117868.11	ESYT2	82	1	0.161651	6.18617	0.0216433	1
log-likelihoods	ss	chr3	gencode::SYNPR::ENSG00000163630.6	SYNPR	30	1	0.141972	7.04366	0.0216986	1
log-likelihoods	ss	chr17	gencode::ATAD5::ENSG00000176208.4	ATAD5	88	1	0.212961	4.69571	0.0217244	1
log-likelihoods	ss	chr18	gencode::PIEZO2::ENSG00000154864.7	PIEZO2	214	3	0.725968	4.13241	0.0217338	1
log-likelihoods	ss	chr2	gencode::IL37::ENSG00000125571.5	IL37	18	1	0.0642532	15.5634	0.0217849	1
log-likelihoods	ss	chr12	gencode::PYROXD1::ENSG00000121350.11	PYROXD1	46	1	0.124896	8.00667	0.0218396	1
log-likelihoods	ss	chr13	gencode::AL136218.1::ENSG00000215462.1	AL136218.1	12	1	0.0407698	24.5279	0.0218687	1
log-likelihoods	ss	chr17	gencode::SPAG7::ENSG00000091640.3	SPAG7	24	1	0.0464328	21.5365	0.0219109	1
log-likelihoods	ss	chr2	gencode::MSTN::ENSG00000138379.4	MSTN	8	1	0.0273112	36.615	0.0222284	1
log-likelihoods	ss	chr5	gencode::PLCXD3::ENSG00000182836.5	PLCXD3	12	1	0.0885824	11.2889	0.0222292	1
log-likelihoods	ss	chr3	gencode::NISCH::ENSG00000010322.11	NISCH	84	1	0.149777	6.67661	0.0225317	1
log-likelihoods	ss	chr4	gencode::MFSD10::ENSG00000109736.10	MFSD10	44	1	0.0896178	11.1585	0.0226506	1
log-likelihoods	ss	chr5	gencode::MARCH6::ENSG00000145495.10	2006-03-01	98	1	0.189754	5.26999	0.0227137	1
log-likelihoods	ss	chr1	gencode::PLK3::ENSG00000173846.8	PLK3	56	1	0.0971203	10.2965	0.0227553	1
log-likelihoods	ss	chr1	gencode::ATP1A4::ENSG00000132681.12	ATP1A4	84	2	0.276615	7.23026	0.0228796	1
log-likelihoods	ss	chr16	gencode::TSC2::ENSG00000103197.12	TSC2	166	1	0.226028	4.42423	0.023001	1
log-likelihoods	ss	chr3	gencode::DZIP3::ENSG00000198919.8	DZIP3	130	2	0.434834	4.59946	0.0230232	1
log-likelihoods	ss	chr16	gencode::STX4::ENSG00000103496.10	STX4	46	1	0.0943709	10.5965	0.0230472	1
log-likelihoods	ss	chr11	gencode::ABCG4::ENSG00000172350.5	ABCG4	58	1	0.113967	8.77448	0.023057	1
log-likelihoods	ss	chr20	gencode::YWHAB::ENSG00000166913.8	YWHAB	24	1	0.0387888	25.7806	0.0230961	1
log-likelihoods	ss	chr6	gencode::MEGT1::ENSG00000250641.1	MEGT1	20	1	0.0615382	16.2501	0.0232209	1
log-likelihoods	ss	chr21	gencode::TPTE::ENSG00000166157.12	TPTE	92	2	0.602336	3.32041	0.0232975	1
log-likelihoods	ss	chr17	gencode::MSL1::ENSG00000188895.7	MSL1	30	1	0.055124	18.1409	0.0233857	1
log-likelihoods	ss	chr20	gencode::ABHD12::ENSG00000100997.14	ABHD12	50	1	0.0745932	13.406	0.0234275	1
log-likelihoods	ss	chr9	gencode::TJP2::ENSG00000119139.12	TJP2	92	2	0.25479	7.8496	0.0235012	1
log-likelihoods	ss	chr8	gencode::TBC1D31::ENSG00000156787.12	TBC1D31	84	1	0.175523	5.69726	0.0235542	1
log-likelihoods	ss	chr16	gencode::APRT::ENSG00000198931.6	APRT	16	1	0.0298948	33.4506	0.023564	1
log-likelihoods	ss	chr1	gencode::FCGR2A::ENSG00000143226.9	FCGR2A	24	1	0.0498781	20.0489	0.0235797	1
log-likelihoods	ss	chr19	gencode::ARHGAP33::ENSG00000004777.14	ARHGAP33	80	1	0.183805	5.44056	0.0237676	1
log-likelihoods	ss	chr14	gencode::TRMT5::ENSG00000126814.6	TRMT5	16	1	0.0459596	21.7583	0.0240188	1
log-likelihoods	ss	chr12	gencode::PRIM1::ENSG00000198056.9	PRIM1	48	1	0.0989373	10.1074	0.0241297	1
log-likelihoods	ss	chr12	gencode::PDE1B::ENSG00000123360.7	PDE1B	64	1	0.144888	6.9019	0.0241451	1
log-likelihoods	ss	chr17	gencode::FTSJ3::ENSG00000108592.12	FTSJ3	80	1	0.11137	8.97911	0.0241638	1
log-likelihoods	ss	chr2	gencode::LHCGR::ENSG00000138039.10	LHCGR	40	1	0.142749	7.0053	0.0241989	1
log-likelihoods	ss	chr14	gencode::METTL17::ENSG00000165792.13	METTL17	48	1	0.120976	8.26613	0.0244312	1
log-likelihoods	ss	chr12	gencode::SBNO1::ENSG00000139697.7	SBNO1	124	2	0.248294	8.05497	0.024438	1
log-likelihoods	ss	chr1	gencode::CASQ1::ENSG00000143318.8	CASQ1	42	1	0.1348	7.41839	0.0246527	1
log-likelihoods	ss	chr6	gencode::OPN5::ENSG00000124818.10	OPN5	24	1	0.10233	9.7723	0.0246834	1
log-likelihoods	ss	chr15	gencode::NDUFAF1::ENSG00000137806.4	NDUFAF1	16	1	0.0363101	27.5406	0.02474	1
log-likelihoods	ss	chr3	gencode::KNG1::ENSG00000113889.7	KNG1	38	1	0.145209	6.88662	0.0248202	1
log-likelihoods	ss	chr18	gencode::CABYR::ENSG00000154040.16	CABYR	26	1	0.0607131	16.4709	0.0249323	1
log-likelihoods	ss	chr9	gencode::SLC24A2::ENSG00000155886.7	SLC24A2	36	1	0.141167	7.08382	0.0249493	1
log-likelihoods	ss	chr9	gencode::LCNL1::ENSG00000214402.6	LCNL1	8	1	0.0307725	32.4965	0.0250364	1
log-likelihoods	ss	chr2	gencode::PRKCE::ENSG00000171132.9	PRKCE	60	1	0.130903	7.63924	0.0250517	1
log-likelihoods	ss	chr19	gencode::DDA1::ENSG00000130311.6	DDA1	16	1	0.0264147	37.8578	0.0251387	1
log-likelihoods	ss	chr14	gencode::FANCM::ENSG00000187790.6	FANCM	86	2	0.251059	7.96625	0.0252582	1
log-likelihoods	ss	chr16	gencode::CTCF::ENSG00000102974.10	CTCF	44	1	0.0909213	10.9985	0.0252686	1
log-likelihoods	ss	chr11	gencode::PRDM10::ENSG00000170325.10	PRDM10	82	1	0.162151	6.16707	0.0252746	1
log-likelihoods	ss	chr3	gencode::C3orf84::ENSG00000236980.5	C3orf84	12	1	0.0294677	33.9355	0.0253109	1
log-likelihoods	ss	chr2	gencode::SLC16A14::ENSG00000163053.6	SLC16A14	16	1	0.0524521	19.065	0.0253634	1
log-likelihoods	ss	chr2	gencode::RUFY4::ENSG00000188282.8	RUFY4	50	1	0.115133	8.68562	0.0254527	1
log-likelihoods	ss	chr7	gencode::ABCB5::ENSG00000004846.12	ABCB5	112	2	0.538371	3.71491	0.0255304	1
log-likelihoods	ss	chr5	gencode::PANK3::ENSG00000120137.6	PANK3	24	1	0.0554657	18.0291	0.0257289	1
log-likelihoods	ss	chr1	gencode::DHDDS::ENSG00000117682.12	DHDDS	32	1	0.0574228	17.4147	0.0258237	1
log-likelihoods	ss	chr12	gencode::MDM2::ENSG00000135679.17	MDM2	40	1	0.0760445	13.1502	0.025893	1
log-likelihoods	ss	chr1	gencode::VPS13D::ENSG00000048707.9	VPS13D	282	2	0.570797	3.50387	0.0259478	1
log-likelihoods	ss	chr16	gencode::KATNB1::ENSG00000140854.8	KATNB1	76	1	0.169461	5.90107	0.0260132	1
log-likelihoods	ss	chr2	gencode::GPR1::ENSG00000183671.8	GPR1	14	1	0.0481562	20.7657	0.0260579	1
log-likelihoods	ss	chr19	gencode::ZNF554::ENSG00000172006.7	ZNF554	20	1	0.0567801	17.6118	0.0260999	1
log-likelihoods	ss	chr6	gencode::IBTK::ENSG00000005700.10	IBTK	112	2	0.309959	6.45247	0.0261755	1
log-likelihoods	ss	chr22	gencode::KIAA0930::ENSG00000100364.14	KIAA0930	42	1	0.0860349	11.6232	0.026264	1
log-likelihoods	ss	chr3	gencode::EIF5A2::ENSG00000163577.3	EIF5A2	16	1	0.0435995	22.936	0.026304	1
log-likelihoods	ss	chr10	gencode::PLA2G12B::ENSG00000138308.5	PLA2G12B	12	1	0.0347755	28.7559	0.0263055	1
log-likelihoods	ss	chr2	gencode::PPIG::ENSG00000138398.11	PPIG	52	1	0.121224	8.24916	0.0265447	1
log-likelihoods	ss	chr16	gencode::MON1B::ENSG00000103111.10	MON1B	18	1	0.0639318	15.6417	0.0265589	1
log-likelihoods	ss	chr1	gencode::RIMS3::ENSG00000117016.5	RIMS3	30	1	0.097915	10.2129	0.0266637	1
log-likelihoods	ss	chr12	gencode::MMAB::ENSG00000139428.7	MMAB	36	1	0.0858799	11.6442	0.0267442	1
log-likelihoods	ss	chr2	gencode::LCT::ENSG00000115850.5	LCT	64	1	0.206644	4.83924	0.0267569	1
log-likelihoods	ss	chr17	gencode::NLE1::ENSG00000073536.13	NLE1	48	1	0.150124	6.66116	0.0267915	1
log-likelihoods	ss	chr3	gencode::DGKG::ENSG00000058866.10	DGKG	96	2	0.301195	6.64022	0.0268418	1
log-likelihoods	ss	chr1	gencode::FAM63A::ENSG00000143409.11	FAM63A	46	1	0.0904215	11.0593	0.0268804	1
log-likelihoods	ss	chr3	gencode::IL17RE::ENSG00000163701.14	IL17RE	64	1	0.116321	8.59688	0.0269889	1
log-likelihoods	ss	chr19	gencode::TYK2::ENSG00000105397.9	TYK2	96	1	0.182452	5.48089	0.0270492	1
log-likelihoods	ss	chr5	gencode::CEP72::ENSG00000112877.6	CEP72	44	1	0.130776	7.64667	0.0271315	1
log-likelihoods	ss	chr1	gencode::SLC26A9::ENSG00000174502.14	SLC26A9	82	2	0.298301	6.70463	0.0271807	1
log-likelihoods	ss	chr1	gencode::TNFSF18::ENSG00000120337.7	TNFSF18	8	1	0.0310336	32.2231	0.0272558	1
log-likelihoods	ss	chr6	gencode::LGSN::ENSG00000146166.12	LGSN	12	1	0.0387869	25.7819	0.0272739	1
log-likelihoods	ss	chr13	gencode::RB1::ENSG00000139687.9	RB1	104	1	0.20153	4.96203	0.0272818	1
log-likelihoods	ss	chr22	gencode::SMC1B::ENSG00000077935.12	SMC1B	96	1	0.237346	4.21326	0.0273708	1
log-likelihoods	ss	chr7	gencode::ARF5::ENSG00000004059.6	ARF5	20	1	0.0491244	20.3565	0.0275105	1
log-likelihoods	ss	chr12	gencode::DPY19L2::ENSG00000177990.7	DPY19L2	84	1	0.357445	2.79763	0.0276175	1
log-likelihoods	ss	chr12	gencode::CLIP1::ENSG00000130779.15	CLIP1	102	1	0.19947	5.0133	0.0276963	1
log-likelihoods	ss	chr16	gencode::KDM8::ENSG00000155666.7	KDM8	30	1	0.0857356	11.6638	0.0277614	1
log-likelihoods	ss	chr6	gencode::UHRF1BP1::ENSG00000065060.12	UHRF1BP1	82	1	0.137725	7.26084	0.027762	1
log-likelihoods	ss	chr19	gencode::TMEM150B::ENSG00000180061.5	TMEM150B	30	1	0.0623418	16.0406	0.027823	1
log-likelihoods	ss	chr22	gencode::MOV10L1::ENSG00000073146.11	MOV10L1	110	2	0.353641	5.65545	0.0279296	1
log-likelihoods	ss	chr2	gencode::PEX13::ENSG00000162928.8	PEX13	18	1	0.0404519	24.7207	0.0279585	1
log-likelihoods	ss	chr19	gencode::ZNF417::ENSG00000173480.6	ZNF417	12	1	0.0355017	28.1677	0.0279598	1
log-likelihoods	ss	chr16	gencode::SRL::ENSG00000185739.9	SRL	22	1	0.0529738	18.8772	0.027991	1
log-likelihoods	ss	chr9	gencode::TEX10::ENSG00000136891.9	TEX10	58	1	0.177025	5.64893	0.0280771	1
log-likelihoods	ss	chr1	gencode::PTGS2::ENSG00000073756.7	PTGS2	36	1	0.121753	8.21335	0.0281454	1
log-likelihoods	ss	chr11	gencode::DDB2::ENSG00000134574.7	DDB2	36	1	0.0644578	15.514	0.0282125	1
log-likelihoods	ss	chr19	gencode::ZNF714::ENSG00000160352.11	ZNF714	22	1	0.0860467	11.6216	0.028278	1
log-likelihoods	ss	chr18	gencode::DLGAP1::ENSG00000170579.10	DLGAP1	56	1	0.110645	9.0379	0.0283415	1
log-likelihoods	ss	chr4	gencode::FAT4::ENSG00000196159.7	FAT4	66	1	0.23457	4.26313	0.0285002	1
log-likelihoods	ss	chr16	gencode::C16orf45::ENSG00000166780.6	C16orf45	24	1	0.0504231	19.8322	0.0285955	1
log-likelihoods	ss	chr8	gencode::DECR1::ENSG00000104325.2	DECR1	44	1	0.0932983	10.7183	0.0286157	1
log-likelihoods	ss	chr19	gencode::CC2D1A::ENSG00000132024.13	CC2D1A	112	1	0.215285	4.64501	0.0287072	1
log-likelihoods	ss	chr4	gencode::CLOCK::ENSG00000134852.10	CLOCK	94	1	0.206021	4.85388	0.028731	1
log-likelihoods	ss	chr1	gencode::MAGOH::ENSG00000162385.6	MAGOH	16	1	0.0290703	34.3994	0.0287413	1
log-likelihoods	ss	chr6	gencode::PDCD2::ENSG00000071994.6	PDCD2	22	1	0.0698864	14.3089	0.0288012	1
log-likelihoods	ss	chr8	gencode::DEPTOR::ENSG00000155792.5	DEPTOR	32	1	0.0927068	10.7867	0.0288716	1
log-likelihoods	ss	chr3	gencode::NSUN3::ENSG00000178694.5	NSUN3	20	1	0.0572725	17.4604	0.0288983	1
log-likelihoods	ss	chr1	gencode::TAS1R1::ENSG00000173662.15	TAS1R1	20	1	0.0515658	19.3927	0.0289859	1
log-likelihoods	ss	chr4	gencode::RUFY3::ENSG00000018189.8	RUFY3	76	1	0.242864	4.11753	0.0290128	1
log-likelihoods	ss	chr21	gencode::RWDD2B::ENSG00000156253.2	RWDD2B	16	1	0.0417513	23.9513	0.0291163	1
log-likelihoods	ss	chr8	gencode::RP11-758M4.1::ENSG00000254349.1	RP11-758M4.1	20	1	0.0911378	10.9724	0.0291501	1
log-likelihoods	ss	chr21	gencode::TMEM50B::ENSG00000142188.12	TMEM50B	24	1	0.0326557	30.6226	0.0291904	1
log-likelihoods	ss	chr11	gencode::SSRP1::ENSG00000149136.3	SSRP1	64	1	0.108968	9.17698	0.0292144	1
log-likelihoods	ss	chr12	gencode::TDG::ENSG00000139372.10	TDG	40	1	0.080764	12.3818	0.0293258	1
log-likelihoods	ss	chr6	gencode::PSMB8::ENSG00000204264.4	PSMB8	22	1	0.0590744	16.9278	0.029446	1
log-likelihoods	ss	chr15	gencode::TMED3::ENSG00000166557.8	TMED3	12	1	0.0513701	19.4666	0.0294563	1
log-likelihoods	ss	chr17	gencode::ABCA6::ENSG00000154262.8	ABCA6	150	2	0.571858	3.49737	0.0295487	1
log-likelihoods	ss	chr17	gencode::ENPP7::ENSG00000182156.5	ENPP7	20	1	0.061739	16.1972	0.0296157	1
log-likelihoods	ss	chr12	gencode::MCRS1::ENSG00000187778.9	MCRS1	62	1	0.127846	7.82193	0.0296539	1
log-likelihoods	ss	chr4	gencode::SCD5::ENSG00000145284.7	SCD5	24	1	0.060186	16.6152	0.0297082	1
log-likelihoods	ss	chr6	gencode::SLC29A1::ENSG00000112759.12	SLC29A1	64	1	0.114999	8.69574	0.0297864	1
log-likelihoods	ss	chr7	gencode::SEMA3D::ENSG00000153993.9	SEMA3D	74	2	0.31096	6.43169	0.0298005	1
log-likelihoods	ss	chr1	gencode::PI4KB::ENSG00000143393.12	PI4KB	52	1	0.0792839	12.6129	0.0298609	1
log-likelihoods	ss	chr2	gencode::UGT1A10::ENSG00000242515.1	UGT1A10	18	1	0.0392164	25.4995	0.0300775	1
log-likelihoods	ss	chr11	gencode::KMT2A::ENSG00000118058.16	KMT2A	140	1	0.244103	4.09664	0.0300805	1
log-likelihoods	ss	chr10	gencode::EXOSC1::ENSG00000171311.8	EXOSC1	28	1	0.0500246	19.9902	0.0301947	1
log-likelihoods	ss	chr16	gencode::NUTF2::ENSG00000102898.7	NUTF2	20	1	0.0329836	30.3181	0.0301951	1
log-likelihoods	ss	chr4	gencode::TXK::ENSG00000074966.6	TXK	56	1	0.157195	6.36154	0.0302137	1
log-likelihoods	ss	chr19	gencode::SMARCA4::ENSG00000127616.13	SMARCA4	160	2	0.287065	6.96707	0.0302917	1
log-likelihoods	ss	chr19	gencode::ARHGEF18::ENSG00000104880.13	ARHGEF18	78	1	0.156923	6.37257	0.0303005	1
log-likelihoods	ss	chr11	gencode::RRAS2::ENSG00000133818.8	RRAS2	28	1	0.0535156	18.6862	0.0303104	1
log-likelihoods	ss	chr12	gencode::NABP2::ENSG00000139579.8	NABP2	26	1	0.042854	23.3351	0.030403	1
log-likelihoods	ss	chr14	gencode::ATXN3::ENSG00000066427.17	ATXN3	42	1	0.0942094	10.6147	0.0304842	1
log-likelihoods	ss	chr6	gencode::LY6G6F::ENSG00000204424.8	LY6G6F	26	1	0.0788688	12.6793	0.0305992	1
log-likelihoods	ss	chr6	gencode::GCNT2::ENSG00000111846.11	GCNT2	30	1	0.078778	12.6939	0.0309219	1
log-likelihoods	ss	chr12	gencode::CD27::ENSG00000139193.3	CD27	20	1	0.0453557	22.0479	0.0309475	1
log-likelihoods	ss	chr13	gencode::SPG20OS::ENSG00000120664.6	SPG20OS	12	1	0.0562565	17.7757	0.0309876	1
log-likelihoods	ss	chr11	gencode::RRP8::ENSG00000132275.6	RRP8	24	1	0.0580525	17.2258	0.031086	1
log-likelihoods	ss	chr20	gencode::SRC::ENSG00000197122.7	SRC	61	1	0.178156	5.61306	0.0311027	1
log-likelihoods	ss	chr7	gencode::ASL::ENSG00000126522.12	ASL	64	1	0.140086	7.13847	0.0312921	1
log-likelihoods	ss	chr5	gencode::AC026740.1::ENSG00000268885.1	AC026740.1	8	1	0.0381354	26.2223	0.0314633	1
log-likelihoods	ss	chr16	gencode::CDK10::ENSG00000185324.17	CDK10	52	1	0.0902226	11.0837	0.0314839	1
log-likelihoods	ss	chr2	gencode::ZC3H15::ENSG00000065548.13	ZC3H15	30	1	0.0650773	15.3664	0.0315639	1
log-likelihoods	ss	chr11	gencode::TUT1::ENSG00000149016.11	TUT1	32	1	0.0663893	15.0627	0.0315822	1
log-likelihoods	ss	chr19	gencode::EPS15L1::ENSG00000127527.9	EPS15L1	88	1	0.178293	5.60874	0.0315927	1
log-likelihoods	ss	chr19	gencode::CTD-2207O23.3::ENSG00000268861.1	CTD-2207O23.3	80	1	0.165705	6.0348	0.0315993	1
log-likelihoods	ss	chr12	gencode::PTPRQ::ENSG00000139304.8	PTPRQ	196	3	1.12732	2.66119	0.0317082	1
log-likelihoods	ss	chr3	gencode::CLSTN2::ENSG00000158258.11	CLSTN2	64	2	0.299998	6.6667	0.0317299	1
log-likelihoods	ss	chr7	gencode::AC091801.1::ENSG00000217455.4	AC091801.1	20	1	0.107707	9.28443	0.0318185	1
log-likelihoods	ss	chr12	gencode::RILPL1::ENSG00000188026.7	RILPL1	32	1	0.0642127	15.5732	0.0318263	1
log-likelihoods	ss	chr2	gencode::C2orf27A::ENSG00000197927.8	C2orf27A	12	1	0.0498211	20.0718	0.0318597	1
log-likelihoods	ss	chr12	gencode::LST3::ENSG00000257046.1	LST3	92	2	0.415626	4.81201	0.0319118	1
log-likelihoods	ss	chr4	gencode::ZNF732::ENSG00000186777.7	ZNF732	12	1	0.0509649	19.6213	0.0319936	1
log-likelihoods	ss	chr2	gencode::NDUFA10::ENSG00000130414.7	NDUFA10	44	1	0.119047	8.40005	0.0321423	1
log-likelihoods	ss	chr5	gencode::FAM151B::ENSG00000152380.5	FAM151B	20	1	0.0618104	16.1785	0.0322384	1
log-likelihoods	ss	chr12	gencode::TBX3::ENSG00000135111.10	TBX3	28	1	0.1032	9.68995	0.0322663	1
log-likelihoods	ss	chr3	gencode::RETNLB::ENSG00000163515.6	RETNLB	8	1	0.0488396	20.4752	0.0323441	1
log-likelihoods	ss	chr16	gencode::SLC9A5::ENSG00000135740.12	SLC9A5	60	1	0.137979	7.2475	0.0324092	1
log-likelihoods	ss	chr7	gencode::EIF2AK1::ENSG00000086232.8	EIF2AK1	58	1	0.097596	10.2463	0.0324318	1
log-likelihoods	ss	chr20	gencode::OSER1::ENSG00000132823.6	OSER1	22	1	0.0486656	20.5484	0.0324505	1
log-likelihoods	ss	chr7	gencode::CPA4::ENSG00000128510.6	CPA4	40	1	0.109691	9.1165	0.0325193	1
log-likelihoods	ss	chr22	gencode::BID::ENSG00000015475.14	BID	28	1	0.052142	19.1784	0.0326012	1
log-likelihoods	ss	chr16	gencode::ZDHHC7::ENSG00000153786.8	ZDHHC7	32	1	0.0662499	15.0944	0.0327252	1
log-likelihoods	ss	chr20	gencode::MATN4::ENSG00000124159.11	MATN4	42	1	0.116581	8.57769	0.0327762	1
log-likelihoods	ss	chr1	gencode::CC2D1B::ENSG00000154222.10	CC2D1B	98	1	0.24617	4.06224	0.0328115	1
log-likelihoods	ss	chr7	gencode::CDK14::ENSG00000058091.12	CDK14	60	1	0.224337	4.45759	0.0328501	1
log-likelihoods	ss	chr11	gencode::NPAS4::ENSG00000174576.4	NPAS4	28	1	0.0682598	14.6499	0.0329026	1
log-likelihoods	ss	chr4	gencode::SNX25::ENSG00000109762.11	SNX25	74	1	0.182767	5.47143	0.0329314	1
log-likelihoods	ss	chr2	gencode::TSSC1::ENSG00000032389.8	TSSC1	38	1	0.113298	8.82628	0.0331166	1
log-likelihoods	ss	chr1	gencode::CLCN6::ENSG00000011021.17	CLCN6	88	1	0.147144	6.79604	0.0335679	1
log-likelihoods	ss	chr3	gencode::RNF168::ENSG00000163961.4	RNF168	20	1	0.0382576	26.1386	0.03366	1
log-likelihoods	ss	chr4	gencode::DCLK2::ENSG00000170390.10	DCLK2	64	1	0.142208	7.03195	0.0336988	1
log-likelihoods	ss	chr12	gencode::SLC41A2::ENSG00000136052.5	SLC41A2	36	1	0.077229	12.9485	0.0337515	1
log-likelihoods	ss	chr2	gencode::CHRNA1::ENSG00000138435.10	CHRNA1	34	1	0.0870204	11.4916	0.0339032	1
log-likelihoods	ss	chr18	gencode::KDSR::ENSG00000119537.11	KDSR	36	1	0.0639014	15.6491	0.0340236	1
log-likelihoods	ss	chr12	gencode::GCN1L1::ENSG00000089154.6	GCN1L1	228	2	0.417538	4.78998	0.0341226	1
log-likelihoods	ss	chr17	gencode::CCDC47::ENSG00000108588.9	CCDC47	50	1	0.0999318	10.0068	0.0341913	1
log-likelihoods	ss	chr15	gencode::RHCG::ENSG00000140519.8	RHCG	42	1	0.127235	7.85949	0.0342783	1
log-likelihoods	ss	chr4	gencode::OCIAD2::ENSG00000145247.7	OCIAD2	24	1	0.0670682	14.9102	0.0343257	1
log-likelihoods	ss	chr1	gencode::VANGL1::ENSG00000173218.10	VANGL1	30	1	0.0809237	12.3573	0.0343565	1
log-likelihoods	ss	chr15	gencode::MTFMT::ENSG00000103707.5	MTFMT	32	1	0.0620699	16.1109	0.0347143	1
log-likelihoods	ss	chr1	gencode::PRKAA2::ENSG00000162409.6	PRKAA2	32	1	0.102638	9.743	0.0349126	1
log-likelihoods	ss	chr21	gencode::MX2::ENSG00000183486.8	MX2	54	1	0.14919	6.70288	0.0349214	1
log-likelihoods	ss	chr1	gencode::KIAA1107::ENSG00000069712.9	KIAA1107	32	1	0.0776842	12.8726	0.034956	1
log-likelihoods	ss	chr2	gencode::ANTXR1::ENSG00000169604.15	ANTXR1	72	1	0.141319	7.07617	0.0350655	1
log-likelihoods	ss	chr18	gencode::CABLES1::ENSG00000134508.8	CABLES1	40	1	0.0945829	10.5727	0.0351444	1
log-likelihoods	ss	chr10	gencode::TAF5::ENSG00000148835.9	TAF5	40	1	0.0574961	17.3925	0.0352512	1
log-likelihoods	ss	chr11	gencode::DDX10::ENSG00000178105.5	DDX10	66	1	0.171056	5.84604	0.0355511	1
log-likelihoods	ss	chr6	gencode::FARS2::ENSG00000145982.7	FARS2	26	1	0.0835121	11.9743	0.0356724	1
log-likelihoods	ss	chr19	gencode::BSG::ENSG00000172270.14	BSG	34	1	0.0747813	13.3723	0.0358437	1
log-likelihoods	ss	chr20	gencode::VPS16::ENSG00000215305.5	VPS16	86	1	0.125302	7.98071	0.0359128	1
log-likelihoods	ss	chr14	gencode::TC2N::ENSG00000165929.8	TC2N	48	1	0.137725	7.26086	0.0359427	1
log-likelihoods	ss	chr3	gencode::GADL1::ENSG00000144644.10	GADL1	54	1	0.183428	5.45174	0.0359443	1
log-likelihoods	ss	chr11	gencode::FADS1::ENSG00000149485.12	FADS1	46	1	0.0755994	13.2276	0.0359528	1
log-likelihoods	ss	chr16	gencode::ROGDI::ENSG00000067836.8	ROGDI	40	1	0.0788361	12.6845	0.0360544	1
log-likelihoods	ss	chr15	gencode::LACTB::ENSG00000103642.7	LACTB	18	1	0.0391223	25.5609	0.0360814	1
log-likelihoods	ss	chr20	gencode::RTFDC1::ENSG00000022277.8	RTFDC1	38	1	0.112082	8.922	0.0362264	1
log-likelihoods	ss	chr12	gencode::GNB3::ENSG00000111664.6	GNB3	38	1	0.0728967	13.7181	0.0363432	1
log-likelihoods	ss	chr21	gencode::PRED60::ENSG00000267883.1	PRED60	12	1	0.0928286	10.7725	0.0364537	1
log-likelihoods	ss	chr6	gencode::RHAG::ENSG00000112077.11	RHAG	36	1	0.233937	4.27465	0.0365342	1
log-likelihoods	ss	chr11	gencode::PGM2L1::ENSG00000165434.6	PGM2L1	52	1	0.0968605	10.3241	0.0366652	1
log-likelihoods	ss	chr11	gencode::CCDC179::ENSG00000255359.2	CCDC179	12	1	0.0572359	17.4716	0.0366703	1
log-likelihoods	ss	chr16	gencode::CES2::ENSG00000172831.7	CES2	44	1	0.0701821	14.2486	0.0366752	1
log-likelihoods	ss	chr7	gencode::TNS3::ENSG00000136205.12	TNS3	126	1	0.288111	3.47088	0.0366757	1
log-likelihoods	ss	chr2	gencode::ZNF512::ENSG00000243943.5	ZNF512	78	1	0.164519	6.07832	0.0368035	1
log-likelihoods	ss	chr19	gencode::TMEM145::ENSG00000167619.7	TMEM145	58	1	0.14216	7.03434	0.0369107	1
log-likelihoods	ss	chr15	gencode::MORF4L1::ENSG00000185787.10	MORF4L1	54	1	0.107419	9.3093	0.0370958	1
log-likelihoods	ss	chr17	gencode::PPP1R1B::ENSG00000131771.9	PPP1R1B	32	1	0.0685518	14.5875	0.0371558	1
log-likelihoods	ss	chr9	gencode::PGM5::ENSG00000154330.8	PGM5	42	1	0.13864	7.21292	0.0374248	1
log-likelihoods	ss	chr1	gencode::CFH::ENSG00000000971.11	CFH	86	2	0.419651	4.76587	0.0374407	1
log-likelihoods	ss	chr1	gencode::TNFRSF9::ENSG00000049249.4	TNFRSF9	28	1	0.0988533	10.116	0.0374867	1
log-likelihoods	ss	chr18	gencode::RP11-683L23.1::ENSG00000173213.7	RP11-683L23.1	10	1	0.0454943	21.9808	0.037488	1
log-likelihoods	ss	chr15	gencode::FAM63B::ENSG00000128923.6	FAM63B	32	1	0.0758712	13.1802	0.0376499	1
log-likelihoods	ss	chr6	gencode::AHI1::ENSG00000135541.16	AHI1	128	1	0.3009	3.32337	0.0377046	1
log-likelihoods	ss	chr1	gencode::INTS7::ENSG00000143493.8	INTS7	76	1	0.127662	7.83317	0.0378876	1
log-likelihoods	ss	chr11	gencode::CAPN5::ENSG00000149260.10	CAPN5	56	1	0.13505	7.40467	0.0379275	1
log-likelihoods	ss	chr7	gencode::UBN2::ENSG00000157741.10	UBN2	68	1	0.163995	6.09776	0.0380744	1
log-likelihoods	ss	chr2	gencode::GORASP2::ENSG00000115806.8	GORASP2	40	1	0.0912174	10.9628	0.0380986	1
log-likelihoods	ss	chr11	gencode::SCYL1::ENSG00000142186.12	SCYL1	66	1	0.105413	9.48648	0.0382426	1
log-likelihoods	ss	chr8	gencode::GTF2E2::ENSG00000197265.4	GTF2E2	28	1	0.0654716	15.2738	0.0382592	1
log-likelihoods	ss	chr1	gencode::MTOR::ENSG00000198793.8	MTOR	228	2	0.445148	4.49289	0.0382777	1
log-likelihoods	ss	chr1	gencode::F13B::ENSG00000143278.3	F13B	44	1	0.279405	3.57903	0.0382984	1
log-likelihoods	ss	chr7	gencode::CALN1::ENSG00000183166.6	CALN1	30	1	0.165719	6.03431	0.0384604	1
log-likelihoods	ss	chr1	gencode::PUM1::ENSG00000134644.11	PUM1	86	1	0.171589	5.82789	0.0384867	1
log-likelihoods	ss	chr2	gencode::FANCL::ENSG00000115392.7	FANCL	52	1	0.11364	8.79971	0.0385023	1
log-likelihoods	ss	chr4	gencode::CHIC2::ENSG00000109220.6	CHIC2	20	1	0.0538279	18.5777	0.038559	1
log-likelihoods	ss	chr20	gencode::CSE1L::ENSG00000124207.12	CSE1L	96	1	0.17925	5.5788	0.0386611	1
log-likelihoods	ss	chr8	gencode::CHMP7::ENSG00000147457.9	CHMP7	40	1	0.081009	12.3443	0.0386846	1
log-likelihoods	ss	chr22	gencode::PPM1F::ENSG00000100034.9	PPM1F	30	1	0.052859	18.9182	0.0388858	1
log-likelihoods	ss	chr17	gencode::BLMH::ENSG00000108578.10	BLMH	44	1	0.0932027	10.7293	0.038945	1
log-likelihoods	ss	chr4	gencode::RP11-487E13.1::ENSG00000249008.1	RP11-487E13.1	12	1	0.0663818	15.0644	0.0391725	1
log-likelihoods	ss	chr2	gencode::SERPINE2::ENSG00000135919.8	SERPINE2	40	1	0.071815	13.9247	0.0392725	1
log-likelihoods	ss	chr3	gencode::TMEM110::ENSG00000213533.7	TMEM110	28	1	0.0808347	12.3709	0.0394085	1
log-likelihoods	ss	chr11	gencode::MRE11A::ENSG00000020922.8	MRE11A	84	1	0.259054	3.8602	0.0394374	1
log-likelihoods	ss	chr11	gencode::STIP1::ENSG00000168439.12	STIP1	52	1	0.110009	9.09018	0.0394561	1
log-likelihoods	ss	chr1	gencode::TPM3::ENSG00000143549.15	TPM3	48	1	0.102017	9.80224	0.0396138	1
log-likelihoods	ss	chr21	gencode::GRIK1::ENSG00000171189.12	GRIK1	76	1	0.298857	3.34608	0.0396956	1
log-likelihoods	ss	chr1	gencode::GIPC2::ENSG00000137960.5	GIPC2	20	1	0.0526881	18.9796	0.0400366	1
log-likelihoods	ss	chr17	gencode::EFCAB3::ENSG00000172421.3	EFCAB3	46	1	0.166982	5.98868	0.0401631	1
log-likelihoods	ss	chr7	gencode::DFNA5::ENSG00000105928.9	DFNA5	48	1	0.125047	7.99699	0.0402766	1
log-likelihoods	ss	chr11	gencode::SAAL1::ENSG00000166788.5	SAAL1	44	1	0.102511	9.75509	0.040296	1
log-likelihoods	ss	chr11	gencode::MMP20::ENSG00000137674.3	MMP20	36	1	0.118309	8.45247	0.0403832	1
log-likelihoods	ss	chr9	gencode::SPATA31E1::ENSG00000177992.9	SPATA31E1	12	1	0.0424194	23.5741	0.0404322	1
log-likelihoods	ss	chr13	gencode::PIBF1::ENSG00000083535.11	PIBF1	68	1	0.111965	8.93134	0.0405903	1
log-likelihoods	ss	chr19	gencode::ZNF587B::ENSG00000269343.2	ZNF587B	18	1	0.0710233	14.0799	0.040651	1
log-likelihoods	ss	chr15	gencode::DISP2::ENSG00000140323.4	DISP2	28	1	0.0576529	17.3452	0.0407018	1
log-likelihoods	ss	chr11	gencode::CCDC82::ENSG00000149231.7	CCDC82	40	1	0.105816	9.45034	0.0410695	1
log-likelihoods	ss	chr22	gencode::TOP3B::ENSG00000100038.15	TOP3B	70	1	0.1506	6.64009	0.0411013	1
log-likelihoods	ss	chr4	gencode::HMGB2::ENSG00000164104.7	HMGB2	18	1	0.056296	17.7633	0.0411451	1
log-likelihoods	ss	chr16	gencode::TMC7::ENSG00000170537.8	TMC7	60	1	0.117986	8.47561	0.041159	1
log-likelihoods	ss	chr12	gencode::TM7SF3::ENSG00000064115.6	TM7SF3	44	1	0.0964414	10.369	0.0412626	1
log-likelihoods	ss	chr2	gencode::GAL3ST2::ENSG00000154252.11	GAL3ST2	12	1	0.0582851	17.1571	0.0414206	1
log-likelihoods	ss	chr11	gencode::NUP160::ENSG00000030066.9	NUP160	134	1	0.235318	4.24957	0.0415051	1
log-likelihoods	ss	chr2	gencode::NFU1::ENSG00000169599.8	NFU1	32	1	0.0541493	18.4675	0.0416371	1
log-likelihoods	ss	chr15	gencode::AVEN::ENSG00000169857.3	AVEN	20	1	0.0516931	19.3449	0.0417126	1
log-likelihoods	ss	chr2	gencode::REG1A::ENSG00000115386.5	REG1A	20	1	0.121206	8.2504	0.0418138	1
log-likelihoods	ss	chr10	gencode::CNNM1::ENSG00000119946.9	CNNM1	44	1	0.151324	6.60834	0.0419164	1
log-likelihoods	ss	chr1	gencode::FAM19A3::ENSG00000184599.9	FAM19A3	16	1	0.0465173	21.4974	0.0419764	1
log-likelihoods	ss	chr6	gencode::UFL1::ENSG00000014123.9	UFL1	72	1	0.289551	3.45362	0.0419977	1
log-likelihoods	ss	chr11	gencode::DLG2::ENSG00000150672.12	DLG2	126	2	0.522728	3.82608	0.0420952	1
log-likelihoods	ss	chr10	gencode::MARCH8::ENSG00000165406.11	2008-03-01	34	1	0.109709	9.11506	0.0423726	1
log-likelihoods	ss	chr20	gencode::MROH8::ENSG00000101353.10	MROH8	90	1	0.151403	6.60487	0.0424934	1
log-likelihoods	ss	chr6	gencode::FOXP4::ENSG00000137166.10	FOXP4	64	1	0.135375	7.38688	0.0425452	1
log-likelihoods	ss	chr16	gencode::HMOX2::ENSG00000103415.7	HMOX2	38	1	0.0692126	14.4482	0.0425848	1
log-likelihoods	ss	chr2	gencode::ITGA4::ENSG00000115232.9	ITGA4	110	1	0.294082	3.40041	0.0425884	1
log-likelihoods	ss	chr2	gencode::ACP1::ENSG00000143727.11	ACP1	18	1	0.0596054	16.777	0.0427227	1
log-likelihoods	ss	chr6	gencode::BTNL2::ENSG00000204290.6	BTNL2	30	1	0.123218	8.11567	0.0428231	1
log-likelihoods	ss	chr9	gencode::SDCCAG3::ENSG00000165689.12	SDCCAG3	36	1	0.0839675	11.9094	0.0428538	1
log-likelihoods	ss	chr9	gencode::BNC2::ENSG00000173068.13	BNC2	32	1	0.0892182	11.2085	0.0430329	1
log-likelihoods	ss	chr8	gencode::RUNX1T1::ENSG00000079102.12	RUNX1T1	56	2	0.327989	6.09777	0.043065	1
log-likelihoods	ss	chr19	gencode::CA11::ENSG00000063180.4	CA11	32	1	0.0741914	13.4786	0.0431156	1
log-likelihoods	ss	chr15	gencode::VPS39::ENSG00000166887.11	VPS39	100	1	0.223768	4.46891	0.0431308	1
log-likelihoods	ss	chr11	gencode::MS4A13::ENSG00000204979.3	MS4A13	24	1	0.143595	6.96402	0.0432629	1
log-likelihoods	ss	chr3	gencode::RASA2::ENSG00000155903.7	RASA2	92	1	0.208222	4.80256	0.0432947	1
log-likelihoods	ss	chr2	gencode::EMILIN1::ENSG00000138080.9	EMILIN1	28	1	0.0529527	18.8848	0.0433323	1
log-likelihoods	ss	chr10	gencode::STAMBPL1::ENSG00000138134.7	STAMBPL1	42	1	0.122337	8.17415	0.0433471	1
log-likelihoods	ss	chr10	gencode::FAM208B::ENSG00000108021.15	FAM208B	80	1	0.16341	6.11959	0.0434798	1
log-likelihoods	ss	chr19	gencode::HMHA1::ENSG00000180448.6	HMHA1	90	1	0.133833	7.47198	0.0435179	1
log-likelihoods	ss	chr1	gencode::NCDN::ENSG00000020129.11	NCDN	28	1	0.0500781	19.9688	0.043576	1
log-likelihoods	ss	chr5	gencode::CCDC69::ENSG00000198624.8	CCDC69	32	1	0.0711084	14.063	0.0436677	1
log-likelihoods	ss	chr10	gencode::VPS26A::ENSG00000122958.10	VPS26A	40	1	0.0781176	12.8012	0.0438355	1
log-likelihoods	ss	chr6	gencode::ESR1::ENSG00000091831.17	ESR1	44	1	0.124204	8.05125	0.0438765	1
log-likelihoods	ss	chr10	gencode::TNKS2::ENSG00000107854.5	TNKS2	104	1	0.217012	4.60803	0.0439666	1
log-likelihoods	ss	chr13	gencode::COL4A1::ENSG00000187498.10	COL4A1	206	2	0.470907	4.24712	0.0439856	1
log-likelihoods	ss	chr5	gencode::RNF44::ENSG00000146083.7	RNF44	42	1	0.0729718	13.7039	0.0439856	1
log-likelihoods	ss	chr12	gencode::MFAP5::ENSG00000197614.6	MFAP5	36	1	0.0962252	10.3923	0.0440156	1
log-likelihoods	ss	chr1	gencode::PRKCZ::ENSG00000067606.11	PRKCZ	58	1	0.0896033	11.1603	0.0440577	1
log-likelihoods	ss	chr17	gencode::AKAP1::ENSG00000121057.8	AKAP1	52	1	0.0869614	11.4994	0.0440683	1
log-likelihoods	ss	chr11	gencode::STX5::ENSG00000162236.7	STX5	40	1	0.0772668	12.9422	0.0440848	1
log-likelihoods	ss	chr15	gencode::DNAJC17::ENSG00000104129.5	DNAJC17	38	1	0.0489241	20.4398	0.0441102	1
log-likelihoods	ss	chr1	gencode::GON4L::ENSG00000116580.14	GON4L	124	1	0.185415	5.3933	0.0441806	1
log-likelihoods	ss	chr19	gencode::C19orf54::ENSG00000188493.10	C19orf54	26	1	0.0497576	20.0974	0.0443018	1
log-likelihoods	ss	chr12	gencode::PPFIA2::ENSG00000139220.12	PPFIA2	146	3	0.802083	3.74026	0.0449596	1
log-likelihoods	ss	chr17	gencode::SDK2::ENSG00000069188.12	SDK2	176	2	0.394223	5.07327	0.0450435	1
log-likelihoods	ss	chr1	gencode::PIGR::ENSG00000162896.5	PIGR	40	1	0.0978727	10.2173	0.0450726	1
log-likelihoods	ss	chr17	gencode::STXBP4::ENSG00000166263.9	STXBP4	70	1	0.268369	3.72622	0.0451482	1
log-likelihoods	ss	chr9	gencode::FAM129B::ENSG00000136830.7	FAM129B	54	1	0.0891625	11.2155	0.0451498	1
log-likelihoods	ss	chr20	gencode::NFS1::ENSG00000244005.8	NFS1	58	1	0.0774408	12.9131	0.045177	1
log-likelihoods	ss	chr1	gencode::MFSD4::ENSG00000174514.8	MFSD4	36	1	0.0859176	11.6391	0.0452843	1
log-likelihoods	ss	chr10	gencode::RGR::ENSG00000148604.9	RGR	26	1	0.142122	7.03622	0.0453045	1
log-likelihoods	ss	chr7	gencode::DENND2A::ENSG00000146966.8	DENND2A	74	1	0.208915	4.78663	0.045433	1
log-likelihoods	ss	chr16	gencode::TUFM::ENSG00000178952.4	TUFM	36	1	0.0581058	17.21	0.0456255	1
log-likelihoods	ss	chr4	gencode::CTSO::ENSG00000256043.2	CTSO	28	1	0.0776134	12.8844	0.0456585	1
log-likelihoods	ss	chr12	gencode::KRT7::ENSG00000135480.10	KRT7	32	1	0.0548073	18.2457	0.0457082	1
log-likelihoods	ss	chr14	gencode::CCDC175::ENSG00000151838.7	CCDC175	78	2	0.3468	5.76701	0.0457468	1
log-likelihoods	ss	chr18	gencode::MAPK4::ENSG00000141639.7	MAPK4	24	1	0.065014	15.3813	0.045826	1
log-likelihoods	ss	chr15	gencode::LIPC::ENSG00000166035.6	LIPC	42	1	0.128797	7.76415	0.0460081	1
log-likelihoods	ss	chr18	gencode::TNFRSF11A::ENSG00000141655.11	TNFRSF11A	36	1	0.077065	12.9761	0.0463242	1
log-likelihoods	ss	chr17	gencode::LRRC37A3::ENSG00000176809.6	LRRC37A3	56	1	0.14511	6.89133	0.0463374	1
log-likelihoods	ss	chr7	gencode::SUMF2::ENSG00000129103.13	SUMF2	36	1	0.0888914	11.2497	0.0463704	1
log-likelihoods	ss	chr14	gencode::HIF1A::ENSG00000100644.12	HIF1A	58	1	0.11333	8.82382	0.0464269	1
log-likelihoods	ss	chr1	gencode::NDUFS2::ENSG00000158864.8	NDUFS2	52	1	0.106668	9.37492	0.0467185	1
log-likelihoods	ss	chr15	gencode::ZNF609::ENSG00000180357.5	ZNF609	34	1	0.0763381	13.0996	0.0468739	1
log-likelihoods	ss	chr4	gencode::TEC::ENSG00000135605.8	TEC	68	1	0.193197	5.17607	0.0469404	1
log-likelihoods	ss	chr1	gencode::GOLT1A::ENSG00000174567.7	GOLT1A	16	1	0.0497753	20.0903	0.0469999	1
log-likelihoods	ss	chr19	gencode::RUVBL2::ENSG00000183207.8	RUVBL2	60	1	0.123529	8.09525	0.0473631	1
log-likelihoods	ss	chr6	gencode::FLOT1::ENSG00000137312.10	FLOT1	48	1	0.113231	8.83147	0.0473895	1
log-likelihoods	ss	chr8	gencode::TRIM55::ENSG00000147573.12	TRIM55	40	1	0.133864	7.47028	0.0474037	1
log-likelihoods	ss	chr1	gencode::BEST4::ENSG00000142959.4	BEST4	32	1	0.0678414	14.7403	0.0475043	1
log-likelihoods	ss	chr16	gencode::AQP8::ENSG00000103375.6	AQP8	22	1	0.0589453	16.9649	0.047589	1
log-likelihoods	ss	chr10	gencode::CDC123::ENSG00000151465.9	CDC123	48	1	0.0666506	15.0036	0.0476205	1
log-likelihoods	ss	chr2	gencode::GFPT1::ENSG00000198380.8	GFPT1	76	1	0.137097	7.29412	0.0476375	1
log-likelihoods	ss	chr14	gencode::KCNK10::ENSG00000100433.11	KCNK10	28	1	0.127919	7.81743	0.0476412	1
log-likelihoods	ss	chr2	gencode::HAT1::ENSG00000128708.8	HAT1	40	1	0.0711598	14.0529	0.0476499	1
log-likelihoods	ss	chr13	gencode::ABCC4::ENSG00000125257.9	ABCC4	130	2	0.364296	5.49004	0.0476524	1
log-likelihoods	ss	chr3	gencode::PDCD6IP::ENSG00000170248.9	PDCD6IP	68	1	0.147493	6.77998	0.0479712	1
log-likelihoods	ss	chr8	gencode::FBXO32::ENSG00000156804.3	FBXO32	32	1	0.058789	17.01	0.0482206	1
log-likelihoods	ss	chr18	gencode::MALT1::ENSG00000172175.8	MALT1	64	1	0.138132	7.23944	0.048278	1
log-likelihoods	ss	chr15	gencode::CLK3::ENSG00000179335.14	CLK3	50	1	0.103125	9.69699	0.0482997	1
log-likelihoods	ss	chr13	gencode::RP11-65D24.2::ENSG00000204398.5	RP11-65D24.2	12	1	0.0613138	16.3095	0.0483774	1
log-likelihoods	ss	chr2	gencode::TMEM178A::ENSG00000152154.6	TMEM178A	12	1	0.0605443	16.5168	0.0485786	1
log-likelihoods	ss	chr5	gencode::NSD1::ENSG00000165671.14	NSD1	94	1	0.158318	6.3164	0.0485813	1
log-likelihoods	ss	chr20	gencode::SULF2::ENSG00000196562.10	SULF2	82	1	0.17616	5.67667	0.0485853	1
log-likelihoods	ss	chr15	gencode::ANPEP::ENSG00000166825.9	ANPEP	80	1	0.155749	6.4206	0.0487298	1
log-likelihoods	ss	chr18	gencode::KIAA1468::ENSG00000134444.9	KIAA1468	120	1	0.266628	3.75055	0.0487358	1
log-likelihoods	ss	chr3	gencode::TMEM110-MUSTN1::ENSG00000248592.3	TMEM110-MUSTN1	34	1	0.0981901	10.1843	0.0487828	1
log-likelihoods	ss	chr22	gencode::ARVCF::ENSG00000099889.9	ARVCF	78	1	0.092114	10.8561	0.0487938	1
log-likelihoods	ss	chr16	gencode::N4BP1::ENSG00000102921.3	N4BP1	24	1	0.0641246	15.5946	0.0489169	1
log-likelihoods	ss	chr1	gencode::ITLN1::ENSG00000179914.4	ITLN1	28	1	0.165563	6.03999	0.0490387	1
log-likelihoods	ss	chr11	gencode::SLC37A2::ENSG00000134955.7	SLC37A2	72	1	0.272873	3.66471	0.0491169	1
log-likelihoods	ss	chr9	gencode::ACO1::ENSG00000122729.14	ACO1	84	1	0.209924	4.76363	0.049133	1
log-likelihoods	ss	chr8	gencode::EXTL3::ENSG00000012232.4	EXTL3	28	1	0.051159	19.5469	0.0491799	1
log-likelihoods	ss	chr11	gencode::APIP::ENSG00000149089.8	APIP	32	1	0.0704529	14.1939	0.0492314	1
log-likelihoods	ss	chr10	gencode::ARHGAP12::ENSG00000165322.13	ARHGAP12	76	1	0.17446	5.73197	0.0492888	1
log-likelihoods	ss	chr6	gencode::ZSCAN9::ENSG00000137185.7	ZSCAN9	16	1	0.0639162	15.6455	0.049329	1
log-likelihoods	ss	chr4	gencode::DCK::ENSG00000156136.5	DCK	28	1	0.0846581	11.8122	0.0493629	1
log-likelihoods	ss	chr11	gencode::ATG13::ENSG00000175224.12	ATG13	82	1	0.136192	7.34256	0.0494318	1
log-likelihoods	ss	chr20	gencode::CSRP2BP::ENSG00000149474.9	CSRP2BP	36	1	0.0970748	10.3013	0.0496296	1
log-likelihoods	ss	chr11	gencode::MUC15::ENSG00000169550.8	MUC15	16	1	0.0767157	13.0351	0.0497227	1
log-likelihoods	ss	chr14	gencode::NOVA1::ENSG00000139910.15	NOVA1	18	1	0.113702	8.79494	0.0497447	1
log-likelihoods	ss	chr4	gencode::EGF::ENSG00000138798.7	EGF	92	1	0.299442	3.33954	0.0497601	1
log-likelihoods	ss	chr10	gencode::PTPRE::ENSG00000132334.12	PTPRE	88	1	0.311693	3.20829	0.0498391	1
log-likelihoods	ss	chr17	gencode::MFSD11::ENSG00000092931.7	MFSD11	56	1	0.0755225	13.2411	0.0499098	1
log-likelihoods	ss	chr7	gencode::TFR2::ENSG00000106327.8	TFR2	76	1	0.177501	5.63378	0.0499766	1
log-likelihoods	ss	chr14	gencode::DDHD1::ENSG00000100523.10	DDHD1	52	1	0.126658	7.89525	0.0502146	1
log-likelihoods	ss	chr1	gencode::TFB2M::ENSG00000162851.6	TFB2M	28	1	0.0659107	15.172	0.0505401	1
log-likelihoods	ss	chr3	gencode::KIAA1257::ENSG00000114656.6	KIAA1257	32	1	0.105497	9.47898	0.0506895	1
log-likelihoods	ss	chr16	gencode::DNASE1::ENSG00000213918.6	DNASE1	40	1	0.0595538	16.7915	0.050712	1
log-likelihoods	ss	chr9	gencode::PHF19::ENSG00000119403.9	PHF19	56	1	0.107624	9.29158	0.0508851	1
log-likelihoods	ss	chr16	gencode::THOC6::ENSG00000131652.9	THOC6	52	1	0.0823334	12.1457	0.051015	1
log-likelihoods	ss	chr11	gencode::SAA2::ENSG00000134339.4	SAA2	22	1	0.0576163	17.3562	0.0510316	1
log-likelihoods	ss	chr2	gencode::RMND5A::ENSG00000153561.8	RMND5A	32	1	0.0817418	12.2336	0.0510562	1
log-likelihoods	ss	chr20	gencode::PANK2::ENSG00000125779.17	PANK2	26	1	0.0602543	16.5963	0.0510599	1
log-likelihoods	ss	chr6	gencode::AARS2::ENSG00000124608.4	AARS2	82	1	0.175229	5.70682	0.0510666	1
log-likelihoods	ss	chr3	gencode::PLCH1::ENSG00000114805.12	PLCH1	100	2	0.383887	5.20987	0.0511183	1
log-likelihoods	ss	chr5	gencode::PRDM6::ENSG00000061455.10	PRDM6	28	1	0.100819	9.91874	0.0511267	1
log-likelihoods	ss	chr16	gencode::SEPT12::ENSG00000140623.9	2012-09-01	36	1	0.0801695	12.4736	0.051244	1
log-likelihoods	ss	chr12	gencode::ADCY6::ENSG00000174233.7	ADCY6	84	1	0.159473	6.27065	0.0514125	1
log-likelihoods	ss	chr17	gencode::HDAC5::ENSG00000108840.11	HDAC5	106	1	0.173886	5.75089	0.051433	1
log-likelihoods	ss	chr12	gencode::TMEM52B::ENSG00000165685.4	TMEM52B	20	1	0.0527583	18.9543	0.0515506	1
log-likelihoods	ss	chr6	gencode::ECT2L::ENSG00000203734.7	ECT2L	80	1	0.270435	3.69775	0.0515987	1
log-likelihoods	ss	chr6	gencode::CLIC5::ENSG00000112782.11	CLIC5	24	1	0.0801711	12.4733	0.0517059	1
log-likelihoods	ss	chr12	gencode::WIF1::ENSG00000156076.5	WIF1	36	1	0.150975	6.62363	0.0519821	1
log-likelihoods	ss	chr14	gencode::MMP14::ENSG00000157227.8	MMP14	36	1	0.0691597	14.4593	0.0519964	1
log-likelihoods	ss	chr20	gencode::PLCB4::ENSG00000101333.12	PLCB4	152	2	0.499805	4.00156	0.0521678	1
log-likelihoods	ss	chr1	gencode::BROX::ENSG00000162819.7	BROX	50	1	0.0936324	10.6801	0.0521789	1
log-likelihoods	ss	chr11	gencode::SIGIRR::ENSG00000185187.8	SIGIRR	36	1	0.0913867	10.9425	0.0521853	1
log-likelihoods	ss	chr20	gencode::PPP1R16B::ENSG00000101445.5	PPP1R16B	40	1	0.111978	8.9303	0.0522508	1
log-likelihoods	ss	chr3	gencode::HTR3D::ENSG00000186090.6	HTR3D	36	1	0.111074	9.00299	0.052257	1
log-likelihoods	ss	chr8	gencode::TPD52::ENSG00000076554.11	TPD52	38	1	0.0915024	10.9287	0.0522664	1
log-likelihoods	ss	chr8	gencode::SHARPIN::ENSG00000179526.12	SHARPIN	32	1	0.0583005	17.1525	0.0525046	1
log-likelihoods	ss	chr20	gencode::PTPRT::ENSG00000196090.8	PTPRT	128	2	0.688212	2.90608	0.0525357	1
log-likelihoods	ss	chr5	gencode::CTD-2203A3.1::ENSG00000248789.1	CTD-2203A3.1	12	1	0.0832557	12.0112	0.0525639	1
log-likelihoods	ss	chr15	gencode::DPP8::ENSG00000074603.14	DPP8	80	1	0.164632	6.07414	0.0527244	1
log-likelihoods	ss	chr3	gencode::ACAP2::ENSG00000114331.8	ACAP2	88	1	0.241608	4.13894	0.0527663	1
log-likelihoods	ss	chr5	gencode::P4HA2::ENSG00000072682.14	P4HA2	68	1	0.156843	6.37581	0.0531008	1
log-likelihoods	ss	chr2	gencode::RFTN2::ENSG00000162944.6	RFTN2	32	1	0.0814722	12.2741	0.0531209	1
log-likelihoods	ss	chr17	gencode::KRT9::ENSG00000171403.5	KRT9	30	1	0.0970609	10.3028	0.0531665	1
log-likelihoods	ss	chr7	gencode::STYXL1::ENSG00000127952.12	STYXL1	38	1	0.084364	11.8534	0.0532626	1
log-likelihoods	ss	chr19	gencode::MKNK2::ENSG00000099875.10	MKNK2	52	1	0.0989336	10.1078	0.0533146	1
log-likelihoods	ss	chr17	gencode::FOXK2::ENSG00000141568.15	FOXK2	32	1	0.0547113	18.2778	0.0534059	1
log-likelihoods	ss	chr16	gencode::PARN::ENSG00000140694.12	PARN	94	1	0.202294	4.9433	0.0535564	1
log-likelihoods	ss	chr1	gencode::NEGR1::ENSG00000172260.9	NEGR1	26	1	0.124935	8.00419	0.0535847	1
log-likelihoods	ss	chr2	gencode::COL5A2::ENSG00000204262.7	COL5A2	212	2	0.479992	4.16673	0.053797	1
log-likelihoods	ss	chr1	gencode::ALDH9A1::ENSG00000143149.8	ALDH9A1	42	1	0.0940397	10.6338	0.0539021	1
log-likelihoods	ss	chr2	gencode::PER2::ENSG00000132326.7	PER2	88	1	0.201544	4.9617	0.0539944	1
log-likelihoods	ss	chr1	gencode::USH2A::ENSG00000042781.8	USH2A	286	3	1.42073	2.11159	0.0540127	1
log-likelihoods	ss	chr9	gencode::RABEPK::ENSG00000136933.12	RABEPK	36	1	0.0726135	13.7715	0.0541351	1
log-likelihoods	ss	chr13	gencode::PROSER1::ENSG00000120685.15	PROSER1	48	1	0.188329	5.30986	0.0542456	1
log-likelihoods	ss	chr16	gencode::ERI2::ENSG00000196678.9	ERI2	52	1	0.10675	9.36765	0.0542865	1
log-likelihoods	ss	chr6	gencode::FAM217A::ENSG00000145975.9	FAM217A	24	1	0.0556945	17.9551	0.05434	1
log-likelihoods	ss	chr21	gencode::ADAMTS1::ENSG00000154734.10	ADAMTS1	32	1	0.0805516	12.4144	0.0543548	1
log-likelihoods	ss	chr6	gencode::CDK19::ENSG00000155111.10	CDK19	56	1	0.151096	6.61833	0.0544895	1
log-likelihoods	ss	chr3	gencode::NR1D2::ENSG00000174738.8	NR1D2	28	1	0.0558565	17.903	0.0544931	1
log-likelihoods	ss	chr1	gencode::NFIA::ENSG00000162599.11	NFIA	46	1	0.0949528	10.5315	0.0545937	1
log-likelihoods	ss	chr3	gencode::TCAIM::ENSG00000179152.14	TCAIM	44	1	0.11444	8.73821	0.0547506	1
log-likelihoods	ss	chr5	gencode::MSH3::ENSG00000113318.9	MSH3	92	1	0.205462	4.86709	0.0547909	1
log-likelihoods	ss	chr9	gencode::C9orf78::ENSG00000136819.10	C9orf78	32	1	0.0637002	15.6985	0.0549501	1
log-likelihoods	ss	chr17	gencode::EFCAB13::ENSG00000178852.11	EFCAB13	94	1	0.227763	4.39053	0.0550538	1
log-likelihoods	ss	chr20	gencode::TOX2::ENSG00000124191.13	TOX2	40	1	0.110355	9.06169	0.0555141	1
log-likelihoods	ss	chr11	gencode::AMICA1::ENSG00000160593.13	AMICA1	38	1	0.0878836	11.3787	0.0556098	1
log-likelihoods	ss	chr22	gencode::RGL4::ENSG00000159496.10	RGL4	46	1	0.0829648	12.0533	0.0558772	1
log-likelihoods	ss	chr18	gencode::YES1::ENSG00000176105.9	YES1	48	1	0.13084	7.6429	0.0561131	1
log-likelihoods	ss	chr20	gencode::ZBP1::ENSG00000124256.10	ZBP1	28	1	0.0913552	10.9463	0.0561694	1
log-likelihoods	ss	chr4	gencode::ATP10D::ENSG00000145246.9	ATP10D	86	1	0.247184	4.04557	0.0561966	1
log-likelihoods	ss	chr1	gencode::YIPF1::ENSG00000058799.9	YIPF1	44	1	0.0937657	10.6649	0.056405	1
log-likelihoods	ss	chr6	gencode::EGFL8::ENSG00000241404.2	EGFL8	34	1	0.0776423	12.8796	0.056604	1
log-likelihoods	ss	chr13	gencode::POSTN::ENSG00000133110.10	POSTN	88	1	0.270665	3.6946	0.0566228	1
log-likelihoods	ss	chr2	gencode::AP1S3::ENSG00000152056.12	AP1S3	22	1	0.0635198	15.7431	0.0566245	1
log-likelihoods	ss	chr16	gencode::ITGAL::ENSG00000005844.13	ITGAL	120	1	0.232328	4.30426	0.0566525	1
log-likelihoods	ss	chr12	gencode::ZNF705A::ENSG00000196946.5	ZNF705A	16	1	0.0585221	17.0876	0.0570199	1
log-likelihoods	ss	chr17	gencode::SLC35B1::ENSG00000121073.9	SLC35B1	32	1	0.0636449	15.7122	0.0570288	1
log-likelihoods	ss	chr9	gencode::NR5A1::ENSG00000136931.5	NR5A1	24	1	0.0849978	11.765	0.0571941	1
log-likelihoods	ss	chr4	gencode::ANXA5::ENSG00000164111.10	ANXA5	48	1	0.104666	9.5542	0.0572604	1
log-likelihoods	ss	chr11	gencode::EIF3F::ENSG00000175390.8	EIF3F	36	1	0.0914806	10.9313	0.057301	1
log-likelihoods	ss	chr3	gencode::YEATS2::ENSG00000163872.11	YEATS2	120	1	0.247204	4.04524	0.0574761	1
log-likelihoods	ss	chr1	gencode::SLC2A1::ENSG00000117394.15	SLC2A1	36	1	0.0688196	14.5307	0.0575877	1
log-likelihoods	ss	chr15	gencode::ARRDC4::ENSG00000140450.7	ARRDC4	30	1	0.112693	8.87368	0.0575999	1
log-likelihoods	ss	chr6	gencode::MAPK14::ENSG00000112062.6	MAPK14	50	1	0.115937	8.62536	0.0578155	1
log-likelihoods	ss	chr12	gencode::IQSEC3::ENSG00000120645.7	IQSEC3	60	1	0.250445	3.99289	0.0578183	1
log-likelihoods	ss	chr15	gencode::SLC12A1::ENSG00000074803.13	SLC12A1	112	1	0.378052	2.64514	0.0579857	1
log-likelihoods	ss	chr18	gencode::CDH7::ENSG00000081138.9	CDH7	44	1	0.195725	5.10921	0.0582104	1
log-likelihoods	ss	chr2	gencode::ICOS::ENSG00000163600.8	ICOS	16	1	0.0652633	15.3225	0.0584196	1
log-likelihoods	ss	chr3	gencode::LARS2::ENSG00000011376.5	LARS2	84	1	0.173313	5.7699	0.0584202	1
log-likelihoods	ss	chr15	gencode::C15orf26::ENSG00000156206.9	C15orf26	24	1	0.0878788	11.3793	0.0584362	1
log-likelihoods	ss	chr11	gencode::CD82::ENSG00000085117.7	CD82	36	1	0.105701	9.46065	0.0586473	1
log-likelihoods	ss	chr14	gencode::SCFD1::ENSG00000092108.16	SCFD1	98	1	0.257532	3.88301	0.058703	1
log-likelihoods	ss	chr22	gencode::ALG12::ENSG00000182858.9	ALG12	36	1	0.0714768	13.9905	0.0587681	1
log-likelihoods	ss	chr11	gencode::KCNQ1::ENSG00000053918.11	KCNQ1	62	1	0.129385	7.72887	0.0588699	1
log-likelihoods	ss	chr10	gencode::AKR1C4::ENSG00000198610.6	AKR1C4	40	1	0.201816	4.955	0.0589643	1
log-likelihoods	ss	chr16	gencode::ALG1::ENSG00000033011.7	ALG1	56	1	0.098774	10.1241	0.0589693	1
log-likelihoods	ss	chr10	gencode::SEC31B::ENSG00000075826.12	SEC31B	116	1	0.224223	4.45985	0.0589714	1
log-likelihoods	ss	chr13	gencode::SMAD9::ENSG00000120693.9	SMAD9	24	1	0.0904101	11.0607	0.0590198	1
log-likelihoods	ss	chr10	gencode::PKD2L1::ENSG00000107593.15	PKD2L1	60	1	0.177699	5.62748	0.0590663	1
log-likelihoods	ss	chr4	gencode::EXOC1::ENSG00000090989.13	EXOC1	74	1	0.163946	6.09955	0.0591644	1
log-likelihoods	ss	chr12	gencode::PLXNC1::ENSG00000136040.4	PLXNC1	120	1	0.358974	2.78572	0.0594651	1
log-likelihoods	ss	chr10	gencode::NRP1::ENSG00000099250.13	NRP1	66	1	0.176243	5.67398	0.0597256	1
log-likelihoods	ss	chr12	gencode::CACNA1C::ENSG00000151067.16	CACNA1C	206	2	0.735553	2.71904	0.0597619	1
log-likelihoods	ss	chr13	gencode::ATP4B::ENSG00000186009.4	ATP4B	24	1	0.0878753	11.3798	0.0598983	1
log-likelihoods	ss	chr7	gencode::VIPR2::ENSG00000106018.9	VIPR2	52	1	0.162491	6.15419	0.0599491	1
log-likelihoods	ss	chr1	gencode::CSF3R::ENSG00000119535.13	CSF3R	66	1	0.139646	7.16096	0.0602426	1
log-likelihoods	ss	chr7	gencode::TBX20::ENSG00000164532.10	TBX20	28	1	0.165974	6.02506	0.0602568	1
log-likelihoods	ss	chr1	gencode::GBP4::ENSG00000162654.8	GBP4	40	1	0.140901	7.0972	0.0602723	1
log-likelihoods	ss	chr2	gencode::PTPRN::ENSG00000054356.9	PTPRN	90	1	0.213328	4.68762	0.0604489	1
log-likelihoods	ss	chr9	gencode::CNTLN::ENSG00000044459.10	CNTLN	100	1	0.306587	3.26172	0.0606877	1
log-likelihoods	ss	chr4	gencode::HERC6::ENSG00000138642.10	HERC6	88	1	0.202653	4.93455	0.0607133	1
log-likelihoods	ss	chr10	gencode::MGEA5::ENSG00000198408.9	MGEA5	66	1	0.134246	7.449	0.0608466	1
log-likelihoods	ss	chr8	gencode::FUT10::ENSG00000172728.11	FUT10	20	1	0.0626406	15.9641	0.060907	1
log-likelihoods	ss	chr11	gencode::VPS11::ENSG00000160695.10	VPS11	62	1	0.107642	9.29002	0.0610369	1
log-likelihoods	ss	chr1	gencode::PHACTR4::ENSG00000204138.8	PHACTR4	54	1	0.1037	9.64316	0.0611124	1
log-likelihoods	ss	chr1	gencode::ITGA10::ENSG00000143127.8	ITGA10	116	1	0.249129	4.01398	0.0612174	1
log-likelihoods	ss	chr20	gencode::PCMTD2::ENSG00000203880.7	PCMTD2	26	1	0.110471	9.05212	0.0612333	1
log-likelihoods	ss	chr10	gencode::COL17A1::ENSG00000065618.12	COL17A1	218	2	0.430602	4.64466	0.0613061	1
log-likelihoods	ss	chr20	gencode::TMC2::ENSG00000149488.11	TMC2	76	1	0.265643	3.76445	0.0613748	1
log-likelihoods	ss	chr10	gencode::SHOC2::ENSG00000108061.7	SHOC2	32	1	0.06856	14.5858	0.0613931	1
log-likelihoods	ss	chr16	gencode::DNAAF1::ENSG00000154099.13	DNAAF1	44	1	0.0969019	10.3197	0.0614724	1
log-likelihoods	ss	chr6	gencode::PDE10A::ENSG00000112541.9	PDE10A	88	1	0.285403	3.50382	0.061495	1
log-likelihoods	ss	chr4	gencode::GAK::ENSG00000178950.12	GAK	108	1	0.223967	4.46494	0.0615303	1
log-likelihoods	ss	chr4	gencode::HGFAC::ENSG00000109758.4	HGFAC	56	1	0.191742	5.21533	0.0615814	1
log-likelihoods	ss	chr1	gencode::DISP1::ENSG00000154309.7	DISP1	34	1	0.073626	13.5822	0.0616613	1
log-likelihoods	ss	chr16	gencode::CNTNAP4::ENSG00000152910.14	CNTNAP4	94	2	0.603838	3.31215	0.0618787	1
log-likelihoods	ss	chr12	gencode::KLRF1::ENSG00000150045.7	KLRF1	20	1	0.0808142	12.3741	0.0618951	1
log-likelihoods	ss	chr11	gencode::RCOR2::ENSG00000167771.5	RCOR2	44	1	0.102505	9.7556	0.0619542	1
log-likelihoods	ss	chr1	gencode::DRAM2::ENSG00000156171.10	DRAM2	34	1	0.0779514	12.8285	0.06196	1
log-likelihoods	ss	chr19	gencode::ZC3H4::ENSG00000130749.5	ZC3H4	56	1	0.12928	7.73516	0.0621577	1
log-likelihoods	ss	chr7	gencode::DNAH11::ENSG00000105877.13	DNAH11	325	3	0.947964	3.16468	0.062286	1
log-likelihoods	ss	chr15	gencode::SLC27A2::ENSG00000140284.6	SLC27A2	42	1	0.111995	8.92899	0.0623184	1
log-likelihoods	ss	chr4	gencode::SULT1E1::ENSG00000109193.6	SULT1E1	28	1	0.13957	7.16485	0.0624862	1
log-likelihoods	ss	chr18	gencode::RIOK3::ENSG00000101782.10	RIOK3	48	1	0.0927269	10.7844	0.062715	1
log-likelihoods	ss	chr11	gencode::SYT7::ENSG00000011347.5	SYT7	48	1	0.0944589	10.5866	0.0627811	1
log-likelihoods	ss	chr19	gencode::GPI::ENSG00000105220.10	GPI	72	1	0.135099	7.40195	0.0628023	1
log-likelihoods	ss	chr3	gencode::LRRC3B::ENSG00000179796.7	LRRC3B	16	1	0.0984147	10.1611	0.0628208	1
log-likelihoods	ss	chr3	gencode::TDGF1::ENSG00000241186.3	TDGF1	22	1	0.0715753	13.9713	0.0630682	1
log-likelihoods	ss	chr21	gencode::TSPEAR::ENSG00000175894.10	TSPEAR	46	1	0.19097	5.23641	0.0632162	1
log-likelihoods	ss	chr12	gencode::XPOT::ENSG00000184575.7	XPOT	96	1	0.208302	4.80072	0.0632435	1
log-likelihoods	ss	chr2	gencode::AGXT::ENSG00000172482.4	AGXT	40	1	0.114774	8.71275	0.0632518	1
log-likelihoods	ss	chr4	gencode::FAT1::ENSG00000083857.9	FAT1	104	1	0.275143	3.63448	0.0634404	1
log-likelihoods	ss	chr7	gencode::GRB10::ENSG00000106070.13	GRB10	90	1	0.257519	3.88321	0.0635373	1
log-likelihoods	ss	chr2	gencode::TNFAIP6::ENSG00000123610.3	TNFAIP6	20	1	0.0740756	13.4997	0.0635416	1
log-likelihoods	ss	chr16	gencode::TEKT5::ENSG00000153060.3	TEKT5	24	1	0.0701916	14.2467	0.0635522	1
log-likelihoods	ss	chr4	gencode::GPM6A::ENSG00000150625.12	GPM6A	30	1	0.151705	6.59174	0.0636223	1
log-likelihoods	ss	chr22	gencode::GGT1::ENSG00000100031.14	GGT1	74	1	0.128912	7.75723	0.06375	1
log-likelihoods	ss	chr8	gencode::C8orf22::ENSG00000168333.9	C8orf22	22	1	0.105657	9.46459	0.0637902	1
log-likelihoods	ss	chr5	gencode::SLC1A3::ENSG00000079215.9	SLC1A3	36	1	0.0764336	13.0833	0.0640674	1
log-likelihoods	ss	chr12	gencode::RNFT2::ENSG00000135119.10	RNFT2	48	1	0.131018	7.63253	0.0641502	1
log-likelihoods	ss	chr1	gencode::NTRK1::ENSG00000198400.7	NTRK1	68	1	0.144359	6.92716	0.0645957	1
log-likelihoods	ss	chr10	gencode::HTRA1::ENSG00000166033.7	HTRA1	32	1	0.0749969	13.3339	0.0646818	1
log-likelihoods	ss	chr15	gencode::ALDH1A2::ENSG00000128918.10	ALDH1A2	54	1	0.207076	4.82913	0.0647124	1
log-likelihoods	ss	chr3	gencode::LRIG1::ENSG00000144749.9	LRIG1	76	1	0.157965	6.33053	0.0647881	1
log-likelihoods	ss	chr17	gencode::CACNB1::ENSG00000067191.11	CACNB1	54	1	0.108217	9.2407	0.0652968	1
log-likelihoods	ss	chr19	gencode::SLC6A16::ENSG00000063127.11	SLC6A16	42	1	0.0998631	10.0137	0.0653593	1
log-likelihoods	ss	chr12	gencode::TMEM5::ENSG00000118600.7	TMEM5	22	1	0.0741097	13.4935	0.065365	1
log-likelihoods	ss	chr3	gencode::COPG1::ENSG00000181789.10	COPG1	92	1	0.143099	6.98819	0.0655486	1
log-likelihoods	ss	chr15	gencode::DMXL2::ENSG00000104093.9	DMXL2	168	1	0.379369	2.63595	0.065791	1
log-likelihoods	ss	chr3	gencode::KCNH8::ENSG00000183960.4	KCNH8	64	1	0.361351	2.76739	0.0660707	1
log-likelihoods	ss	chr17	gencode::PSMD3::ENSG00000108344.10	PSMD3	48	1	0.080168	12.4738	0.0661473	1
log-likelihoods	ss	chr6	gencode::PLAGL1::ENSG00000118495.14	PLAGL1	44	1	0.10498	9.52562	0.0661723	1
log-likelihoods	ss	chr2	gencode::CALCRL::ENSG00000064989.8	CALCRL	60	1	0.17799	5.61829	0.066229	1
log-likelihoods	ss	chr19	gencode::DAZAP1::ENSG00000071626.12	DAZAP1	48	1	0.0994192	10.0584	0.0663308	1
log-likelihoods	ss	chr16	gencode::CETP::ENSG00000087237.6	CETP	62	1	0.133291	7.50238	0.0664207	1
log-likelihoods	ss	chr1	gencode::GBP3::ENSG00000117226.7	GBP3	40	1	0.13424	7.44934	0.066633	1
log-likelihoods	ss	chr15	gencode::ARHGAP11A::ENSG00000198826.6	ARHGAP11A	50	1	0.152725	6.54773	0.0668138	1
log-likelihoods	ss	chr3	gencode::SLMAP::ENSG00000163681.10	SLMAP	94	1	0.170408	5.86827	0.0669134	1
log-likelihoods	ss	chr1	gencode::USP24::ENSG00000162402.8	USP24	268	2	0.514634	3.88626	0.0669353	1
log-likelihoods	ss	chr20	gencode::ZNF133::ENSG00000125846.11	ZNF133	30	1	0.0744505	13.4317	0.066995	1
log-likelihoods	ss	chr1	gencode::SNX7::ENSG00000162627.12	SNX7	36	1	0.137316	7.28245	0.0671024	1
log-likelihoods	ss	chr2	gencode::SLC9A2::ENSG00000115616.2	SLC9A2	44	1	0.215909	4.63158	0.0672757	1
log-likelihoods	ss	chr4	gencode::ADH1B::ENSG00000196616.8	ADH1B	32	1	0.126755	7.88922	0.0675269	1
log-likelihoods	ss	chr16	gencode::NDRG4::ENSG00000103034.10	NDRG4	76	1	0.164316	6.08585	0.0676312	1
log-likelihoods	ss	chr17	gencode::P2RX5::ENSG00000083454.17	P2RX5	44	1	0.126493	7.90559	0.067724	1
log-likelihoods	ss	chr13	gencode::MYO16::ENSG00000041515.11	MYO16	138	2	0.429392	4.65775	0.0677843	1
log-likelihoods	ss	chr10	gencode::WDFY4::ENSG00000128815.13	WDFY4	246	2	0.921098	2.17132	0.067793	1
log-likelihoods	ss	chr7	gencode::ITGB8::ENSG00000105855.5	ITGB8	58	1	0.16477	6.06907	0.0678957	1
log-likelihoods	ss	chr10	gencode::PNLIPRP3::ENSG00000203837.4	PNLIPRP3	44	1	0.270161	3.7015	0.068185	1
log-likelihoods	ss	chr4	gencode::UGT2B11::ENSG00000213759.4	UGT2B11	20	1	0.0971413	10.2943	0.0682376	1
log-likelihoods	ss	chr18	gencode::NEDD4L::ENSG00000049759.12	NEDD4L	138	1	0.32946	3.03527	0.0686415	1
log-likelihoods	ss	chr17	gencode::TVP23C::ENSG00000175106.12	TVP23C	28	1	0.0967411	10.3369	0.0687357	1
log-likelihoods	ss	chr17	gencode::SPACA3::ENSG00000141316.8	SPACA3	22	1	0.107477	9.30431	0.0690448	1
log-likelihoods	ss	chr6	gencode::FHL5::ENSG00000112214.6	FHL5	24	1	0.115093	8.68859	0.0690513	1
log-likelihoods	ss	chr8	gencode::KCNQ3::ENSG00000184156.11	KCNQ3	58	1	0.32247	3.10106	0.06922	1
log-likelihoods	ss	chr3	gencode::PROS1::ENSG00000184500.10	PROS1	58	1	0.237516	4.21024	0.0692614	1
log-likelihoods	ss	chr3	gencode::SEMA3F::ENSG00000001617.7	SEMA3F	76	1	0.174676	5.72489	0.0693167	1
log-likelihoods	ss	chr1	gencode::UCHL5::ENSG00000116750.9	UCHL5	54	1	0.140726	7.106	0.0695115	1
log-likelihoods	ss	chr2	gencode::KIAA1715::ENSG00000144320.9	KIAA1715	62	1	0.22367	4.47087	0.0695789	1
log-likelihoods	ss	chr10	gencode::ZWINT::ENSG00000122952.12	ZWINT	32	1	0.149026	6.71025	0.0695864	1
log-likelihoods	ss	chr2	gencode::TMEM214::ENSG00000119777.14	TMEM214	64	1	0.126228	7.92216	0.0695891	1
log-likelihoods	ss	chr16	gencode::CLUAP1::ENSG00000103351.8	CLUAP1	48	1	0.0894263	11.1824	0.0696215	1
log-likelihoods	ss	chr19	gencode::LILRB5::ENSG00000105609.12	LILRB5	48	1	0.133313	7.50117	0.0698037	1
log-likelihoods	ss	chr14	gencode::NIN::ENSG00000100503.19	NIN	124	1	0.239947	4.16759	0.0700864	1
log-likelihoods	ss	chr1	gencode::ARNT::ENSG00000143437.16	ARNT	88	1	0.152403	6.56156	0.0702974	1
log-likelihoods	ss	chr17	gencode::COL1A1::ENSG00000108821.9	COL1A1	200	1	0.35302	2.8327	0.0704833	1
log-likelihoods	ss	chr10	gencode::DYDC2::ENSG00000133665.8	DYDC2	28	1	0.122135	8.18764	0.0706655	1
log-likelihoods	ss	chr1	gencode::AHCYL1::ENSG00000168710.13	AHCYL1	68	1	0.125678	7.95684	0.0711767	1
log-likelihoods	ss	chr12	gencode::SRRM4::ENSG00000139767.4	SRRM4	48	1	0.231485	4.31993	0.0712358	1
log-likelihoods	ss	chr12	gencode::OGFOD2::ENSG00000111325.12	OGFOD2	42	1	0.0747318	13.3812	0.0713569	1
log-likelihoods	ss	chr9	gencode::TRMT10B::ENSG00000165275.5	TRMT10B	32	1	0.0738008	13.55	0.0713618	1
log-likelihoods	ss	chr3	gencode::BFSP2::ENSG00000170819.4	BFSP2	24	1	0.0821737	12.1693	0.0715668	1
log-likelihoods	ss	chr6	gencode::QRSL1::ENSG00000130348.7	QRSL1	38	1	0.0903983	11.0622	0.0716205	1
log-likelihoods	ss	chr9	gencode::FNBP1::ENSG00000187239.12	FNBP1	68	1	0.127862	7.82096	0.0717836	1
log-likelihoods	ss	chr5	gencode::FYB::ENSG00000082074.11	FYB	74	1	0.159821	6.25701	0.0718067	1
log-likelihoods	ss	chr18	gencode::NFATC1::ENSG00000131196.13	NFATC1	36	1	0.114768	8.71322	0.0718137	1
log-likelihoods	ss	chr4	gencode::CCDC109B::ENSG00000005059.11	CCDC109B	28	1	0.0818556	12.2166	0.0720092	1
log-likelihoods	ss	chr12	gencode::KCNH3::ENSG00000135519.6	KCNH3	56	1	0.138493	7.22059	0.0720916	1
log-likelihoods	ss	chr22	gencode::SBF1::ENSG00000100241.16	SBF1	160	1	0.247895	4.03397	0.0721217	1
log-likelihoods	ss	chr17	gencode::TRIM16::ENSG00000221926.7	TRIM16	40	1	0.113491	8.81129	0.0721419	1
log-likelihoods	ss	chr19	gencode::DMPK::ENSG00000104936.13	DMPK	54	1	0.0957419	10.4447	0.0723006	1
log-likelihoods	ss	chr1	gencode::TNNT2::ENSG00000118194.14	TNNT2	76	1	0.225723	4.43021	0.0723256	1
log-likelihoods	ss	chr17	gencode::NOS2::ENSG00000007171.12	NOS2	104	1	0.307356	3.25356	0.0723364	1
log-likelihoods	ss	chr1	gencode::AKT3::ENSG00000117020.12	AKT3	60	1	0.178702	5.59591	0.0725416	1
log-likelihoods	ss	chr16	gencode::LAT::ENSG00000213658.6	LAT	46	1	0.117823	8.48732	0.0727067	1
log-likelihoods	ss	chr5	gencode::SMN1::ENSG00000172062.12	SMN1	32	1	0.0772557	12.944	0.0728714	1
log-likelihoods	ss	chr3	gencode::EFCC1::ENSG00000114654.6	EFCC1	28	1	0.0755499	13.2363	0.07299	1
log-likelihoods	ss	chr14	gencode::CDH24::ENSG00000139880.15	CDH24	52	1	0.104649	9.55574	0.0730695	1
log-likelihoods	ss	chr16	gencode::CALB2::ENSG00000172137.14	CALB2	40	1	0.146181	6.84085	0.0734305	1
log-likelihoods	ss	chr19	gencode::SSBP4::ENSG00000130511.11	SSBP4	66	1	0.114294	8.74939	0.0734587	1
log-likelihoods	ss	chr12	gencode::PAN2::ENSG00000135473.10	PAN2	106	1	0.143631	6.96227	0.0735073	1
log-likelihoods	ss	chr4	gencode::RAP1GDS1::ENSG00000138698.10	RAP1GDS1	56	1	0.240246	4.1624	0.0735584	1
log-likelihoods	ss	chr7	gencode::HECW1::ENSG00000002746.10	HECW1	116	1	0.392979	2.54466	0.0735777	1
log-likelihoods	ss	chr11	gencode::PACSIN3::ENSG00000165912.11	PACSIN3	42	1	0.0767096	13.0362	0.0736016	1
log-likelihoods	ss	chr7	gencode::FBXO24::ENSG00000106336.8	FBXO24	38	1	0.0904405	11.057	0.0736356	1
log-likelihoods	ss	chr7	gencode::NPSR1::ENSG00000187258.9	NPSR1	42	1	0.242038	4.13157	0.0736917	1
log-likelihoods	ss	chr2	gencode::GMPPA::ENSG00000144591.13	GMPPA	50	1	0.093641	10.6791	0.0737213	1
log-likelihoods	ss	chr6	gencode::CMTR1::ENSG00000137200.8	CMTR1	92	1	0.233962	4.2742	0.0737396	1
log-likelihoods	ss	chr13	gencode::MCF2L::ENSG00000126217.16	MCF2L	136	1	0.361355	2.76736	0.0738021	1
log-likelihoods	ss	chr5	gencode::G3BP1::ENSG00000145907.10	G3BP1	50	1	0.108339	9.23028	0.074254	1
log-likelihoods	ss	chr17	gencode::PITPNM3::ENSG00000091622.11	PITPNM3	76	1	0.177968	5.61899	0.0742816	1
log-likelihoods	ss	chr15	gencode::MNS1::ENSG00000138587.5	MNS1	36	1	0.0933312	10.7145	0.0742873	1
log-likelihoods	ss	chr15	gencode::HCN4::ENSG00000138622.3	HCN4	28	1	0.13387	7.46993	0.0742874	1
log-likelihoods	ss	chr6	gencode::PPT2::ENSG00000221988.8	PPT2	46	1	0.110546	9.04603	0.0744282	1
log-likelihoods	ss	chr8	gencode::MAPK15::ENSG00000181085.10	MAPK15	52	1	0.129033	7.74995	0.0744632	1
log-likelihoods	ss	chr6	gencode::LCA5::ENSG00000135338.9	LCA5	34	1	0.093397	10.707	0.0745337	1
log-likelihoods	ss	chr17	gencode::KANSL1::ENSG00000120071.8	KANSL1	60	1	0.208674	4.79217	0.0746776	1
log-likelihoods	ss	chr5	gencode::CSF1R::ENSG00000182578.9	CSF1R	84	1	0.15293	6.53895	0.0750883	1
log-likelihoods	ss	chr8	gencode::WHSC1L1::ENSG00000147548.12	WHSC1L1	94	1	0.185328	5.39583	0.0752529	1
log-likelihoods	ss	chr14	gencode::PPP4R4::ENSG00000119698.7	PPP4R4	102	2	0.478281	4.18164	0.0754976	1
log-likelihoods	ss	chr6	gencode::MSH5::ENSG00000204410.10	MSH5	116	1	0.287818	3.47442	0.0759277	1
log-likelihoods	ss	chr4	gencode::FBXL5::ENSG00000118564.10	FBXL5	44	1	0.0987531	10.1263	0.076087	1
log-likelihoods	ss	chr2	gencode::CWC22::ENSG00000163510.9	CWC22	78	1	0.308743	3.23894	0.0765365	1
log-likelihoods	ss	chr10	gencode::OGDHL::ENSG00000197444.5	OGDHL	88	1	0.225016	4.44413	0.0765538	1
log-likelihoods	ss	chr2	gencode::MRPS9::ENSG00000135972.4	MRPS9	40	1	0.139165	7.18572	0.0766133	1
log-likelihoods	ss	chr6	gencode::OPRM1::ENSG00000112038.13	OPRM1	38	1	0.203232	4.92049	0.076716	1
log-likelihoods	ss	chr5	gencode::ELL2::ENSG00000118985.10	ELL2	44	1	0.0874071	11.4407	0.0767575	1
log-likelihoods	ss	chr8	gencode::PABPC1::ENSG00000070756.9	PABPC1	62	1	0.115909	8.62743	0.0768617	1
log-likelihoods	ss	chr19	gencode::AURKC::ENSG00000105146.8	AURKC	28	1	0.12059	8.29259	0.0772758	1
log-likelihoods	ss	chr2	gencode::XDH::ENSG00000158125.5	XDH	140	2	0.525434	3.80638	0.0773727	1
log-likelihoods	ss	chr20	gencode::SNRPB2::ENSG00000125870.6	SNRPB2	26	1	0.0820551	12.1869	0.0775899	1
log-likelihoods	ss	chr14	gencode::DCAF11::ENSG00000100897.13	DCAF11	60	1	0.10466	9.55479	0.0777994	1
log-likelihoods	ss	chr4	gencode::ANK2::ENSG00000145362.12	ANK2	196	2	0.72285	2.76682	0.0778118	1
log-likelihoods	ss	chr14	gencode::REC8::ENSG00000100918.8	REC8	76	1	0.130447	7.66593	0.0778315	1
log-likelihoods	ss	chr2	gencode::ELMOD3::ENSG00000115459.13	ELMOD3	60	1	0.126304	7.91741	0.0781674	1
log-likelihoods	ss	chr1	gencode::ZZZ3::ENSG00000036549.8	ZZZ3	58	1	0.118845	8.41431	0.0782985	1
log-likelihoods	ss	chr13	gencode::CAB39L::ENSG00000102547.14	CAB39L	50	1	0.127678	7.83217	0.0783671	1
log-likelihoods	ss	chr12	gencode::TSPAN8::ENSG00000127324.4	TSPAN8	48	1	0.148988	6.71195	0.078435	1
log-likelihoods	ss	chr17	gencode::BRCA1::ENSG00000012048.15	BRCA1	100	1	0.199811	5.00474	0.0784474	1
log-likelihoods	ss	chr2	gencode::ICA1L::ENSG00000163596.12	ICA1L	50	1	0.126939	7.87779	0.0784558	1
log-likelihoods	ss	chr19	gencode::KIAA0355::ENSG00000166398.8	KIAA0355	52	1	0.0842666	11.8671	0.0786224	1
log-likelihoods	ss	chr12	gencode::GRIN2B::ENSG00000273079.1	GRIN2B	48	1	0.213684	4.67982	0.0786465	1
log-likelihoods	ss	chr7	gencode::SH2B2::ENSG00000160999.8	SH2B2	36	1	0.107263	9.32291	0.0786923	1
log-likelihoods	ss	chr3	gencode::TGM4::ENSG00000163810.7	TGM4	52	1	0.149135	6.70534	0.0788586	1
log-likelihoods	ss	chr12	gencode::IPO8::ENSG00000133704.5	IPO8	98	1	0.270352	3.69887	0.078915	1
log-likelihoods	ss	chr1	gencode::ARHGEF2::ENSG00000116584.13	ARHGEF2	106	1	0.205475	4.86678	0.0790953	1
log-likelihoods	ss	chr2	gencode::VIT::ENSG00000205221.8	VIT	58	1	0.164191	6.09047	0.0791054	1
log-likelihoods	ss	chr6	gencode::SOBP::ENSG00000112320.7	SOBP	24	1	0.0839245	11.9155	0.0791977	1
log-likelihoods	ss	chr21	gencode::SIK1::ENSG00000142178.7	SIK1	52	1	0.101435	9.85857	0.0793513	1
log-likelihoods	ss	chr18	gencode::NAPG::ENSG00000134265.8	NAPG	44	1	0.137305	7.28304	0.0793945	1
log-likelihoods	ss	chr1	gencode::PANK4::ENSG00000157881.9	PANK4	72	1	0.153873	6.49888	0.0794598	1
log-likelihoods	ss	chr9	gencode::RABGAP1::ENSG00000011454.12	RABGAP1	102	1	0.264615	3.77907	0.0795587	1
log-likelihoods	ss	chr17	gencode::CDRT1::ENSG00000241322.4	CDRT1	44	1	0.181793	5.50076	0.0796954	1
log-likelihoods	ss	chr18	gencode::CTDP1::ENSG00000060069.12	CTDP1	48	1	0.138383	7.22631	0.0801075	1
log-likelihoods	ss	chr19	gencode::CTD-3193O13.9::ENSG00000183248.7	CTD-3193O13.9	20	1	0.0933545	10.7119	0.0803598	1
log-likelihoods	ss	chr19	gencode::ZNF45::ENSG00000124459.7	ZNF45	36	1	0.0985137	10.1509	0.0807944	1
log-likelihoods	ss	chr6	gencode::TRMT11::ENSG00000066651.13	TRMT11	50	1	0.103442	9.66721	0.0808228	1
log-likelihoods	ss	chr12	gencode::DIP2B::ENSG00000066084.8	DIP2B	148	1	0.297277	3.36387	0.081062	1
log-likelihoods	ss	chr3	gencode::STAB1::ENSG00000010327.6	STAB1	272	1	0.404846	2.47007	0.0812861	1
log-likelihoods	ss	chr10	gencode::SVIL::ENSG00000197321.10	SVIL	162	1	0.42415	2.35766	0.081298	1
log-likelihoods	ss	chr17	gencode::MYH8::ENSG00000133020.4	MYH8	156	2	0.806634	2.47944	0.0812981	1
log-likelihoods	ss	chr11	gencode::PPME1::ENSG00000214517.4	PPME1	52	1	0.0919473	10.8758	0.0813137	1
log-likelihoods	ss	chr11	gencode::EED::ENSG00000074266.13	EED	46	1	0.0865409	11.5552	0.081439	1
log-likelihoods	ss	chr12	gencode::OS9::ENSG00000135506.11	OS9	56	1	0.119126	8.39447	0.0817462	1
log-likelihoods	ss	chr2	gencode::TTC21B::ENSG00000123607.10	TTC21B	128	2	0.51521	3.88191	0.0819232	1
log-likelihoods	ss	chr7	gencode::TRPV5::ENSG00000127412.2	TRPV5	54	1	0.242849	4.11778	0.082032	1
log-likelihoods	ss	chr7	gencode::KIAA1549::ENSG00000122778.5	KIAA1549	74	1	0.206891	4.83346	0.0823839	1
log-likelihoods	ss	chr5	gencode::GABRA6::ENSG00000145863.6	GABRA6	32	1	0.182534	5.47844	0.0823918	1
log-likelihoods	ss	chr7	gencode::AKR1D1::ENSG00000122787.10	AKR1D1	32	1	0.110193	9.07498	0.0824582	1
log-likelihoods	ss	chr20	gencode::DIDO1::ENSG00000101191.12	DIDO1	62	1	0.11288	8.85895	0.0828896	1
log-likelihoods	ss	chr20	gencode::ZNF512B::ENSG00000196700.3	ZNF512B	70	1	0.115492	8.65857	0.0829545	1
log-likelihoods	ss	chr8	gencode::STMN4::ENSG00000015592.12	STMN4	26	1	0.111497	8.96885	0.0831292	1
log-likelihoods	ss	chr19	gencode::BRD4::ENSG00000141867.13	BRD4	82	1	0.196928	5.07799	0.0831313	1
log-likelihoods	ss	chr1	gencode::GPA33::ENSG00000143167.7	GPA33	24	1	0.11438	8.74282	0.0833347	1
log-likelihoods	ss	chr11	gencode::C11orf65::ENSG00000166323.8	C11orf65	34	1	0.118956	8.4065	0.083453	1
log-likelihoods	ss	chr9	gencode::ZCCHC6::ENSG00000083223.13	ZCCHC6	104	1	0.253361	3.94694	0.0834664	1
log-likelihoods	ss	chr2	gencode::DNAJC10::ENSG00000077232.12	DNAJC10	94	1	0.213923	4.67458	0.0835732	1
log-likelihoods	ss	chr3	gencode::PCCB::ENSG00000114054.9	PCCB	72	1	0.17495	5.7159	0.0836617	1
log-likelihoods	ss	chr16	gencode::MLST8::ENSG00000167965.13	MLST8	34	1	0.087282	11.4571	0.0838424	1
log-likelihoods	ss	chr6	gencode::QKI::ENSG00000112531.12	QKI	30	1	0.122473	8.16507	0.0839942	1
log-likelihoods	ss	chr14	gencode::MAP3K9::ENSG00000006432.11	MAP3K9	54	1	0.137141	7.29177	0.0840228	1
log-likelihoods	ss	chr2	gencode::ABCA12::ENSG00000144452.10	ABCA12	208	2	0.914482	2.18703	0.0840951	1
log-likelihoods	ss	chr2	gencode::CCDC104::ENSG00000163001.7	CCDC104	40	1	0.0898598	11.1284	0.0841259	1
log-likelihoods	ss	chr16	gencode::GLG1::ENSG00000090863.7	GLG1	102	1	0.21109	4.73731	0.084187	1
log-likelihoods	ss	chr2	gencode::LIMS2::ENSG00000072163.14	LIMS2	58	1	0.104813	9.5408	0.0842015	1
log-likelihoods	ss	chr13	gencode::SPACA7::ENSG00000153498.7	SPACA7	26	1	0.160381	6.23515	0.0843746	1
log-likelihoods	ss	chr14	gencode::MYH6::ENSG00000197616.7	MYH6	152	2	0.495711	4.03461	0.0844353	1
log-likelihoods	ss	chr10	gencode::PCDH15::ENSG00000150275.13	PCDH15	176	3	1.04882	2.86036	0.084556	1
log-likelihoods	ss	chr15	gencode::FAM227B::ENSG00000166262.11	FAM227B	72	1	0.125432	7.97242	0.0846386	1
log-likelihoods	ss	chr9	gencode::PTPN3::ENSG00000070159.9	PTPN3	102	1	0.261583	3.82288	0.0847174	1
log-likelihoods	ss	chr22	gencode::GRAMD4::ENSG00000075240.12	GRAMD4	72	1	0.178804	5.59271	0.0847273	1
log-likelihoods	ss	chr3	gencode::DLEC1::ENSG00000008226.15	DLEC1	144	1	0.294593	3.39451	0.0848815	1
log-likelihoods	ss	chr1	gencode::STXBP3::ENSG00000116266.6	STXBP3	72	1	0.132799	7.53018	0.0849677	1
log-likelihoods	ss	chr17	gencode::KRT39::ENSG00000196859.3	KRT39	24	1	0.0921351	10.8536	0.0850422	1
log-likelihoods	ss	chr10	gencode::NEBL::ENSG00000078114.14	NEBL	122	1	0.385309	2.59532	0.0852828	1
log-likelihoods	ss	chr2	gencode::REV1::ENSG00000135945.5	REV1	88	1	0.234486	4.26464	0.0853057	1
log-likelihoods	ss	chr7	gencode::PARP12::ENSG00000059378.8	PARP12	44	1	0.140636	7.11058	0.0853128	1
log-likelihoods	ss	chr19	gencode::STXBP2::ENSG00000076944.10	STXBP2	72	1	0.127336	7.85322	0.0854816	1
log-likelihoods	ss	chr8	gencode::VPS13B::ENSG00000132549.14	VPS13B	248	2	0.740238	2.70184	0.0856409	1
log-likelihoods	ss	chr16	gencode::SH2B1::ENSG00000178188.10	SH2B1	48	1	0.0938775	10.6522	0.0857404	1
log-likelihoods	ss	chr5	gencode::RAD17::ENSG00000152942.14	RAD17	74	1	0.109957	9.09444	0.085881	1
log-likelihoods	ss	chr21	gencode::SON::ENSG00000159140.13	SON	52	1	0.0971685	10.2914	0.086231	1
log-likelihoods	ss	chr2	gencode::INPP4A::ENSG00000040933.11	INPP4A	106	1	0.316897	3.1556	0.0862371	1
log-likelihoods	ss	chr2	gencode::KLHL29::ENSG00000119771.10	KLHL29	52	1	0.158472	6.31028	0.0863427	1
log-likelihoods	ss	chr5	gencode::NSUN2::ENSG00000037474.10	NSUN2	72	1	0.194586	5.13911	0.0864509	1
log-likelihoods	ss	chr11	gencode::ARAP1::ENSG00000186635.10	ARAP1	138	1	0.25647	3.89908	0.0866301	1
log-likelihoods	ss	chr11	gencode::ZNF215::ENSG00000149054.10	ZNF215	28	1	0.109743	9.11222	0.0866643	1
log-likelihoods	ss	chr11	gencode::C11orf74::ENSG00000166352.11	C11orf74	32	1	0.103727	9.64068	0.0866906	1
log-likelihoods	ss	chr5	gencode::KIAA0947::ENSG00000164151.7	KIAA0947	72	1	0.207042	4.82994	0.0867376	1
log-likelihoods	ss	chr11	gencode::GIF::ENSG00000134812.3	GIF	34	1	0.132002	7.57565	0.0867545	1
log-likelihoods	ss	chr1	gencode::CR2::ENSG00000117322.12	CR2	76	1	0.20415	4.89836	0.0868904	1
log-likelihoods	ss	chr6	gencode::EXOC2::ENSG00000112685.9	EXOC2	108	1	0.264027	3.78749	0.086992	1
log-likelihoods	ss	chr7	gencode::BZW2::ENSG00000136261.10	BZW2	48	1	0.114726	8.71639	0.0870827	1
log-likelihoods	ss	chr22	gencode::EFCAB6::ENSG00000186976.10	EFCAB6	122	1	0.484558	2.06373	0.0871688	1
log-likelihoods	ss	chr17	gencode::EFCAB5::ENSG00000176927.10	EFCAB5	94	1	0.253322	3.94755	0.0872639	1
log-likelihoods	ss	chr16	gencode::AC004381.6::ENSG00000005189.15	AC004381.6	78	1	0.160157	6.24388	0.0875388	1
log-likelihoods	ss	chr14	gencode::SUPT16H::ENSG00000092201.5	SUPT16H	102	1	0.205403	4.86848	0.0880466	1
log-likelihoods	ss	chr1	gencode::CACNA1E::ENSG00000198216.6	CACNA1E	200	3	1.00139	2.99584	0.0882338	1
log-likelihoods	ss	chr11	gencode::ACER3::ENSG00000078124.7	ACER3	50	1	0.0985733	10.1447	0.0884459	1
log-likelihoods	ss	chr12	gencode::TMTC2::ENSG00000179104.4	TMTC2	48	1	0.212971	4.69547	0.0886419	1
log-likelihoods	ss	chr10	gencode::C10orf128::ENSG00000204161.9	C10orf128	24	1	0.124421	8.03724	0.0886868	1
log-likelihoods	ss	chr2	gencode::DPP4::ENSG00000197635.5	DPP4	100	1	0.319309	3.13176	0.0886918	1
log-likelihoods	ss	chr5	gencode::FAM114A2::ENSG00000055147.13	FAM114A2	58	1	0.151763	6.58923	0.0886973	1
log-likelihoods	ss	chr1	gencode::DFFB::ENSG00000169598.11	DFFB	30	1	0.0950069	10.5256	0.0887725	1
log-likelihoods	ss	chr3	gencode::MFN1::ENSG00000171109.14	MFN1	68	1	0.205732	4.86069	0.0888551	1
log-likelihoods	ss	chr11	gencode::HEPHL1::ENSG00000181333.11	HEPHL1	76	1	0.330999	3.02116	0.0890667	1
log-likelihoods	ss	chr7	gencode::FLNC::ENSG00000128591.11	FLNC	188	1	0.400232	2.49855	0.0891426	1
log-likelihoods	ss	chr15	gencode::STRA6::ENSG00000137868.14	STRA6	80	1	0.162063	6.17045	0.0892138	1
log-likelihoods	ss	chr3	gencode::USP19::ENSG00000172046.14	USP19	106	1	0.185455	5.39216	0.0893242	1
log-likelihoods	ss	chr19	gencode::DNM2::ENSG00000079805.12	DNM2	88	1	0.154692	6.46446	0.0895361	1
log-likelihoods	ss	chr12	gencode::LGR5::ENSG00000139292.8	LGR5	68	1	0.210681	4.74651	0.0896445	1
log-likelihoods	ss	chr2	gencode::DNAH7::ENSG00000118997.9	DNAH7	260	2	0.594789	3.36253	0.089706	1
log-likelihoods	ss	chr18	gencode::ATP9B::ENSG00000166377.15	ATP9B	122	1	0.429754	2.32691	0.0897153	1
log-likelihoods	ss	chr4	gencode::PRDM8::ENSG00000152784.11	PRDM8	38	1	0.142146	7.03501	0.0901337	1
log-likelihoods	ss	chr12	gencode::PDE3A::ENSG00000172572.6	PDE3A	60	1	0.186348	5.3663	0.0902076	1
log-likelihoods	ss	chr15	gencode::GOLGA8M::ENSG00000188626.5	GOLGA8M	68	1	0.35342	2.82949	0.0902825	1
log-likelihoods	ss	chr18	gencode::DSG4::ENSG00000175065.7	DSG4	60	1	0.211221	4.73439	0.0906284	1
log-likelihoods	ss	chr1	gencode::NBPF10::ENSG00000163386.16	NBPF10	350	1	0.908369	1.10087	0.0907922	1
log-likelihoods	ss	chr12	gencode::AACS::ENSG00000081760.12	AACS	70	1	0.129974	7.69384	0.0908958	1
log-likelihoods	ss	chr3	gencode::TBC1D23::ENSG00000036054.8	TBC1D23	72	1	0.155586	6.42731	0.0909299	1
log-likelihoods	ss	chr1	gencode::ESRRG::ENSG00000196482.12	ESRRG	64	1	0.320362	3.12147	0.0911325	1
log-likelihoods	ss	chr11	gencode::TRIM64C::ENSG00000214891.4	TRIM64C	24	1	0.166154	6.01852	0.0911472	1
log-likelihoods	ss	chr13	gencode::UPF3A::ENSG00000169062.10	UPF3A	36	1	0.11414	8.76118	0.091205	1
log-likelihoods	ss	chr1	gencode::NUP133::ENSG00000069248.9	NUP133	102	1	0.202553	4.93697	0.0913093	1
log-likelihoods	ss	chr2	gencode::DPYSL5::ENSG00000157851.12	DPYSL5	50	1	0.150896	6.62708	0.0913615	1
log-likelihoods	ss	chr12	gencode::RECQL::ENSG00000004700.11	RECQL	60	1	0.152397	6.56182	0.0914713	1
log-likelihoods	ss	chr19	gencode::MPND::ENSG00000008382.11	MPND	48	1	0.0980978	10.1939	0.0914855	1
log-likelihoods	ss	chr4	gencode::UGT2B7::ENSG00000171234.9	UGT2B7	20	1	0.106597	9.38115	0.0916391	1
log-likelihoods	ss	chr1	gencode::DOCK7::ENSG00000116641.11	DOCK7	198	1	0.451395	2.21535	0.0919735	1
log-likelihoods	ss	chr2	gencode::TRAF3IP1::ENSG00000204104.7	TRAF3IP1	68	1	0.129333	7.73199	0.0920772	1
log-likelihoods	ss	chr4	gencode::ABCE1::ENSG00000164163.6	ABCE1	68	1	0.17633	5.67119	0.0922682	1
log-likelihoods	ss	chr2	gencode::KIAA1211L::ENSG00000196872.6	KIAA1211L	36	1	0.111345	8.98109	0.0923645	1
log-likelihoods	ss	chr6	gencode::GPR115::ENSG00000153294.7	GPR115	44	1	0.184605	5.41698	0.0925095	1
log-likelihoods	ss	chr4	gencode::AGA::ENSG00000038002.4	AGA	32	1	0.105369	9.49048	0.092753	1
log-likelihoods	ss	chr17	gencode::SUPT6H::ENSG00000109111.10	SUPT6H	148	1	0.277885	3.59861	0.0928537	1
log-likelihoods	ss	chr18	gencode::ST8SIA5::ENSG00000101638.9	ST8SIA5	28	1	0.100481	9.95212	0.0929727	1
log-likelihoods	ss	chr14	gencode::NEMF::ENSG00000165525.13	NEMF	126	1	0.278133	3.5954	0.0930752	1
log-likelihoods	ss	chr13	gencode::BRCA2::ENSG00000139618.10	BRCA2	108	1	0.297029	3.36667	0.0934415	1
log-likelihoods	ss	chr12	gencode::KANSL2::ENSG00000139620.8	KANSL2	36	1	0.107017	9.34434	0.0934543	1
log-likelihoods	ss	chr2	gencode::HDLBP::ENSG00000115677.12	HDLBP	116	1	0.149444	6.69149	0.0944486	1
log-likelihoods	ss	chr19	gencode::LDLR::ENSG00000130164.7	LDLR	68	1	0.127235	7.85946	0.094751	1
log-likelihoods	ss	chr4	gencode::CCDC158::ENSG00000163749.13	CCDC158	94	1	0.322954	3.09642	0.0947989	1
log-likelihoods	ss	chr20	gencode::CEP250::ENSG00000126001.11	CEP250	134	1	0.239731	4.17134	0.0948509	1
log-likelihoods	ss	chr2	gencode::SCN9A::ENSG00000169432.10	SCN9A	108	1	0.469724	2.12891	0.0954211	1
log-likelihoods	ss	chr3	gencode::CHL1::ENSG00000134121.5	CHL1	108	1	0.411813	2.42829	0.0955801	1
log-likelihoods	ss	chr12	gencode::PPFIBP1::ENSG00000110841.9	PPFIBP1	116	1	0.256399	3.90017	0.0958048	1
log-likelihoods	ss	chr19	gencode::SHKBP1::ENSG00000160410.10	SHKBP1	68	1	0.118332	8.45082	0.0960552	1
log-likelihoods	ss	chr5	gencode::ACSL6::ENSG00000164398.8	ACSL6	100	1	0.330353	3.02707	0.0962811	1
log-likelihoods	ss	chr11	gencode::CCDC67::ENSG00000165325.9	CCDC67	54	1	0.255574	3.91275	0.0969885	1
log-likelihoods	ss	chr8	gencode::C8orf34::ENSG00000165084.11	C8orf34	54	1	0.286563	3.48963	0.0970056	1
log-likelihoods	ss	chr19	gencode::GTF2F1::ENSG00000125651.9	GTF2F1	48	1	0.103023	9.70655	0.0971655	1
log-likelihoods	ss	chr13	gencode::PSPC1::ENSG00000121390.13	PSPC1	32	1	0.104282	9.58934	0.0973106	1
log-likelihoods	ss	chr11	gencode::CTNND1::ENSG00000198561.8	CTNND1	92	1	0.180704	5.53393	0.0975229	1
log-likelihoods	ss	chr3	gencode::ARMC8::ENSG00000114098.13	ARMC8	88	1	0.184379	5.42362	0.0983755	1
log-likelihoods	ss	chr6	gencode::AIM1::ENSG00000112297.10	AIM1	78	1	0.169723	5.89197	0.098532	1
log-likelihoods	ss	chr7	gencode::CLIP2::ENSG00000106665.11	CLIP2	64	1	0.132915	7.5236	0.098578	1
log-likelihoods	ss	chr11	gencode::FOLH1::ENSG00000086205.12	FOLH1	76	1	0.39834	2.51042	0.0986234	1
log-likelihoods	ss	chr1	gencode::C8A::ENSG00000157131.10	C8A	40	1	0.181455	5.511	0.098944	1
log-likelihoods	ss	chr18	gencode::DSG1::ENSG00000134760.5	DSG1	58	1	0.179137	5.58231	0.0990725	1
log-likelihoods	ss	chr7	gencode::TBRG4::ENSG00000136270.9	TBRG4	44	1	0.104215	9.59557	0.0992712	1
log-likelihoods	ss	chr4	gencode::MMRN1::ENSG00000138722.5	MMRN1	34	1	0.11086	9.02036	0.0993233	1
log-likelihoods	ss	chr9	gencode::CYLC2::ENSG00000155833.10	CYLC2	32	1	0.144843	6.90404	0.0994764	1
log-likelihoods	ss	chr17	gencode::RGS9::ENSG00000108370.11	RGS9	70	1	0.207309	4.82371	0.0996882	1
log-likelihoods	ss	chr11	gencode::HPS5::ENSG00000110756.13	HPS5	92	1	0.172333	5.8027	0.0997906	1
log-likelihoods	ss	chr19	gencode::CAMSAP3::ENSG00000076826.5	CAMSAP3	72	1	0.14312	6.98716	0.0999379	1
log-likelihoods	ss	chr1	gencode::UBR4::ENSG00000127481.10	UBR4	428	2	0.878182	2.27743	0.0999454	1
log-likelihoods	ss	chr17	gencode::KIAA0753::ENSG00000198920.5	KIAA0753	76	1	0.105083	9.5163	0.10005	1
log-likelihoods	ss	chr20	gencode::BFSP1::ENSG00000125864.7	BFSP1	44	1	0.125956	7.93927	0.100198	1
log-likelihoods	ss	chr9	gencode::ADAMTSL2::ENSG00000197859.5	ADAMTSL2	74	1	0.162728	6.14524	0.100331	1
log-likelihoods	ss	chr8	gencode::GSDMC::ENSG00000147697.4	GSDMC	52	1	0.151286	6.60998	0.100352	1
log-likelihoods	ss	chr9	gencode::NOL6::ENSG00000165271.12	NOL6	102	1	0.178849	5.59132	0.100379	1
log-likelihoods	ss	chr7	gencode::CCDC136::ENSG00000128596.12	CCDC136	72	1	0.187713	5.32729	0.10048	1
log-likelihoods	ss	chr5	gencode::ARAP3::ENSG00000120318.11	ARAP3	128	1	0.28087	3.56037	0.100537	1
log-likelihoods	ss	chr18	gencode::C18orf8::ENSG00000141452.5	C18orf8	76	1	0.112121	8.91896	0.100622	1
log-likelihoods	ss	chr2	gencode::ATF2::ENSG00000115966.12	ATF2	66	1	0.221555	4.51355	0.100644	1
log-likelihoods	ss	chr8	gencode::MCPH1::ENSG00000147316.8	MCPH1	50	1	0.151175	6.61484	0.100711	1
log-likelihoods	ss	chr11	gencode::EXT2::ENSG00000151348.9	EXT2	58	1	0.159152	6.28331	0.100852	1
log-likelihoods	ss	chr9	gencode::ANKS6::ENSG00000165138.12	ANKS6	62	1	0.140511	7.11689	0.100991	1
log-likelihoods	ss	chr12	gencode::KRT72::ENSG00000170486.6	KRT72	40	1	0.139841	7.15098	0.101103	1
log-likelihoods	ss	chr19	gencode::PLK5::ENSG00000185988.7	PLK5	52	1	0.13929	7.17925	0.1012	1
log-likelihoods	ss	chr2	gencode::CPS1::ENSG00000021826.10	CPS1	154	1	0.489029	2.04487	0.101379	1
log-likelihoods	ss	chr2	gencode::ARMC9::ENSG00000135931.13	ARMC9	80	1	0.196817	5.08085	0.101511	1
log-likelihoods	ss	chr4	gencode::COL25A1::ENSG00000188517.10	COL25A1	158	1	0.513605	1.94702	0.101654	1
log-likelihoods	ss	chr3	gencode::PLS1::ENSG00000120756.8	PLS1	64	1	0.158093	6.32537	0.101702	1
log-likelihoods	ss	chr9	gencode::KIAA1432::ENSG00000107036.7	KIAA1432	98	1	0.236958	4.22016	0.101776	1
log-likelihoods	ss	chr7	gencode::AC073343.1::ENSG00000198580.6	AC073343.1	46	1	0.166634	6.00118	0.102339	1
log-likelihoods	ss	chr15	gencode::SNRPN::ENSG00000128739.16	SNRPN	64	1	0.210912	4.74132	0.102404	1
log-likelihoods	ss	chr6	gencode::CCDC170::ENSG00000120262.8	CCDC170	40	1	0.119641	8.35832	0.10275	1
log-likelihoods	ss	chr17	gencode::P4HB::ENSG00000185624.10	P4HB	42	1	0.115897	8.62834	0.102927	1
log-likelihoods	ss	chr2	gencode::GREB1::ENSG00000196208.9	GREB1	140	1	0.320538	3.11975	0.103107	1
log-likelihoods	ss	chr19	gencode::PKN1::ENSG00000123143.8	PKN1	86	1	0.146346	6.83313	0.103137	1
log-likelihoods	ss	chr13	gencode::TNFSF11::ENSG00000120659.10	TNFSF11	28	1	0.113689	8.79596	0.103445	1
log-likelihoods	ss	chr1	gencode::DCAF8::ENSG00000258465.2	DCAF8	66	1	0.138003	7.2462	0.103453	1
log-likelihoods	ss	chr1	gencode::SYT6::ENSG00000134207.10	SYT6	32	1	0.119766	8.3496	0.103566	1
log-likelihoods	ss	chr9	gencode::ELAVL2::ENSG00000107105.10	ELAVL2	32	1	0.1344	7.44049	0.103628	1
log-likelihoods	ss	chr4	gencode::CNOT6L::ENSG00000138767.8	CNOT6L	46	1	0.109553	9.12803	0.104078	1
log-likelihoods	ss	chr19	gencode::SSC5D::ENSG00000179954.10	SSC5D	54	1	0.137448	7.2755	0.104224	1
log-likelihoods	ss	chr21	gencode::CHAF1B::ENSG00000159259.7	CHAF1B	52	1	0.120344	8.30952	0.104687	1
log-likelihoods	ss	chr6	gencode::SLC22A1::ENSG00000175003.8	SLC22A1	40	1	0.13059	7.65753	0.104812	1
log-likelihoods	ss	chr19	gencode::CHERP::ENSG00000085872.10	CHERP	64	1	0.110555	9.04526	0.104981	1
log-likelihoods	ss	chr10	gencode::TBC1D12::ENSG00000108239.8	TBC1D12	48	1	0.146593	6.82161	0.105127	1
log-likelihoods	ss	chr11	gencode::MS4A1::ENSG00000156738.13	MS4A1	26	1	0.141159	7.08419	0.10516	1
log-likelihoods	ss	chr12	gencode::SLC38A1::ENSG00000111371.11	SLC38A1	74	1	0.168711	5.9273	0.105198	1
log-likelihoods	ss	chr2	gencode::DNER::ENSG00000187957.7	DNER	48	1	0.173162	5.77495	0.105321	1
log-likelihoods	ss	chr1	gencode::WDR63::ENSG00000162643.8	WDR63	90	1	0.312944	3.19546	0.105344	1
log-likelihoods	ss	chr14	gencode::SEC23A::ENSG00000100934.10	SEC23A	82	1	0.175796	5.68843	0.105501	1
log-likelihoods	ss	chr16	gencode::MEIOB::ENSG00000162039.10	MEIOB	58	1	0.118583	8.43293	0.105536	1
log-likelihoods	ss	chr9	gencode::CEP78::ENSG00000148019.8	CEP78	62	1	0.163499	6.11624	0.105537	1
log-likelihoods	ss	chr15	gencode::SEMA4B::ENSG00000185033.10	SEMA4B	58	1	0.111481	8.97014	0.10581	1
log-likelihoods	ss	chr14	gencode::ATL1::ENSG00000198513.7	ATL1	60	1	0.127157	7.86431	0.105984	1
log-likelihoods	ss	chr9	gencode::FCN2::ENSG00000160339.11	FCN2	28	1	0.111808	8.94391	0.106107	1
log-likelihoods	ss	chr10	gencode::PCGF5::ENSG00000180628.10	PCGF5	40	1	0.119126	8.39446	0.106366	1
log-likelihoods	ss	chr8	gencode::KHDRBS3::ENSG00000131773.9	KHDRBS3	34	1	0.129945	7.69553	0.106618	1
log-likelihoods	ss	chr3	gencode::QARS::ENSG00000172053.10	QARS	94	1	0.156121	6.40528	0.106626	1
log-likelihoods	ss	chr17	gencode::RNF157::ENSG00000141576.10	RNF157	70	1	0.140842	7.10016	0.106865	1
log-likelihoods	ss	chr11	gencode::TMPRSS5::ENSG00000166682.6	TMPRSS5	50	1	0.16476	6.06943	0.106982	1
log-likelihoods	ss	chr19	gencode::MUM1::ENSG00000160953.10	MUM1	60	1	0.12397	8.0665	0.107255	1
log-likelihoods	ss	chr22	gencode::IL17REL::ENSG00000188263.6	IL17REL	56	1	0.238633	4.19054	0.107261	1
log-likelihoods	ss	chr14	gencode::PRMT5::ENSG00000100462.11	PRMT5	66	1	0.124159	8.05422	0.107308	1
log-likelihoods	ss	chr7	gencode::ATP6V0A4::ENSG00000105929.11	ATP6V0A4	84	1	0.287224	3.4816	0.10755	1
log-likelihoods	ss	chr1	gencode::COL24A1::ENSG00000171502.10	COL24A1	236	2	0.854008	2.3419	0.10763	1
log-likelihoods	ss	chr5	gencode::CTNNA1::ENSG00000044115.16	CTNNA1	74	1	0.138213	7.23522	0.107686	1
log-likelihoods	ss	chr20	gencode::COL20A1::ENSG00000101203.12	COL20A1	144	1	0.413501	2.41838	0.107713	1
log-likelihoods	ss	chr7	gencode::DLD::ENSG00000091140.8	DLD	52	1	0.133879	7.46945	0.107835	1
log-likelihoods	ss	chr19	gencode::KIR2DL4::ENSG00000189013.10	KIR2DL4	30	1	0.142476	7.01873	0.107978	1
log-likelihoods	ss	chr11	gencode::TRIM66::ENSG00000166436.11	TRIM66	86	1	0.222453	4.49533	0.108238	1
log-likelihoods	ss	chr8	gencode::LONRF1::ENSG00000154359.8	LONRF1	46	1	0.147894	6.76158	0.108318	1
log-likelihoods	ss	chr2	gencode::GRB14::ENSG00000115290.5	GRB14	54	1	0.212453	4.70693	0.108526	1
log-likelihoods	ss	chr3	gencode::GRAMD1C::ENSG00000178075.15	GRAMD1C	76	1	0.202718	4.93296	0.108888	1
log-likelihoods	ss	chr4	gencode::N4BP2::ENSG00000078177.9	N4BP2	68	1	0.129037	7.74972	0.109251	1
log-likelihoods	ss	chr11	gencode::PLEKHA7::ENSG00000166689.10	PLEKHA7	102	1	0.296749	3.36985	0.109267	1
log-likelihoods	ss	chr9	gencode::PSIP1::ENSG00000164985.10	PSIP1	66	1	0.187183	5.34235	0.109463	1
log-likelihoods	ss	chr1	gencode::C1orf112::ENSG00000000460.12	C1orf112	100	1	0.253673	3.94209	0.109538	1
log-likelihoods	ss	chr19	gencode::NCAN::ENSG00000130287.9	NCAN	60	1	0.157429	6.35207	0.109787	1
log-likelihoods	ss	chr22	gencode::HIRA::ENSG00000100084.10	HIRA	102	1	0.20498	4.87853	0.109909	1
log-likelihoods	ss	chr2	gencode::CYTIP::ENSG00000115165.5	CYTIP	42	1	0.210798	4.74387	0.109957	1
log-likelihoods	ss	chr4	gencode::DTHD1::ENSG00000197057.4	DTHD1	34	1	0.160139	6.24456	0.11034	1
log-likelihoods	ss	chr12	gencode::ITPR2::ENSG00000123104.7	ITPR2	226	2	0.580767	3.44372	0.11039	1
log-likelihoods	ss	chr8	gencode::HR::ENSG00000168453.10	HR	72	1	0.150091	6.66262	0.111026	1
log-likelihoods	ss	chr19	gencode::ADAMTS10::ENSG00000142303.9	ADAMTS10	98	1	0.222933	4.48565	0.111051	1
log-likelihoods	ss	chr16	gencode::BANP::ENSG00000172530.15	BANP	56	1	0.117881	8.48313	0.111532	1
log-likelihoods	ss	chr5	gencode::TRPC7::ENSG00000069018.13	TRPC7	44	1	0.174874	5.71842	0.111628	1
log-likelihoods	ss	chr14	gencode::HEATR5A::ENSG00000129493.10	HEATR5A	140	1	0.257886	3.87768	0.112131	1
log-likelihoods	ss	chr13	gencode::MYCBP2::ENSG00000005810.13	MYCBP2	334	2	0.939442	2.12892	0.112194	1
log-likelihoods	ss	chr10	gencode::USP54::ENSG00000166348.13	USP54	92	1	0.160299	6.23833	0.112319	1
log-likelihoods	ss	chr1	gencode::TTC13::ENSG00000143643.8	TTC13	88	1	0.258923	3.86216	0.112426	1
log-likelihoods	ss	chr9	gencode::TNC::ENSG00000041982.10	TNC	114	1	0.253998	3.93704	0.112558	1
log-likelihoods	ss	chr9	gencode::GDA::ENSG00000119125.12	GDA	60	1	0.18615	5.37201	0.112868	1
log-likelihoods	ss	chr2	gencode::REL::ENSG00000162924.9	REL	40	1	0.123021	8.12871	0.11291	1
log-likelihoods	ss	chr1	gencode::EPHA2::ENSG00000142627.9	EPHA2	64	1	0.121394	8.23762	0.113275	1
log-likelihoods	ss	chr18	gencode::TMX3::ENSG00000166479.5	TMX3	56	1	0.195501	5.11507	0.113316	1
log-likelihoods	ss	chr9	gencode::PCSK5::ENSG00000099139.9	PCSK5	144	2	0.643138	3.10975	0.113345	1
log-likelihoods	ss	chr5	gencode::ANKRD32::ENSG00000133302.8	ANKRD32	80	1	0.229428	4.35866	0.113404	1
log-likelihoods	ss	chr7	gencode::CYP3A5::ENSG00000106258.9	CYP3A5	60	1	0.150301	6.65331	0.113415	1
log-likelihoods	ss	chr16	gencode::NOD2::ENSG00000167207.7	NOD2	44	1	0.154073	6.49045	0.11346	1
log-likelihoods	ss	chr18	gencode::TTC39C::ENSG00000168234.8	TTC39C	60	1	0.138372	7.22689	0.113654	1
log-likelihoods	ss	chr16	gencode::RLTPR::ENSG00000159753.9	RLTPR	148	1	0.242222	4.12844	0.113705	1
log-likelihoods	ss	chr6	gencode::TINAG::ENSG00000137251.11	TINAG	42	1	0.207501	4.81924	0.114021	1
log-likelihoods	ss	chr2	gencode::CCDC108::ENSG00000181378.9	CCDC108	136	1	0.392704	2.54644	0.114112	1
log-likelihoods	ss	chr3	gencode::DOCK3::ENSG00000088538.12	DOCK3	208	2	0.719466	2.77984	0.114239	1
log-likelihoods	ss	chr19	gencode::DMKN::ENSG00000161249.16	DMKN	86	1	0.197172	5.07171	0.114244	1
log-likelihoods	ss	chr1	gencode::EPB41::ENSG00000159023.14	EPB41	86	1	0.147062	6.79983	0.11436	1
log-likelihoods	ss	chr2	gencode::MAP3K19::ENSG00000176601.7	MAP3K19	40	1	0.136899	7.30463	0.114403	1
log-likelihoods	ss	chr20	gencode::SOGA1::ENSG00000149639.10	SOGA1	64	1	0.126614	7.89804	0.11445	1
log-likelihoods	ss	chr12	gencode::IRAK3::ENSG00000090376.4	IRAK3	46	1	0.144384	6.92599	0.114528	1
log-likelihoods	ss	chr13	gencode::FRY::ENSG00000073910.15	FRY	244	2	0.647614	3.08826	0.114593	1
log-likelihoods	ss	chr18	gencode::PHLPP1::ENSG00000081913.9	PHLPP1	64	1	0.136654	7.31777	0.114786	1
log-likelihoods	ss	chr13	gencode::VWA8::ENSG00000102763.11	VWA8	174	1	0.452566	2.20962	0.115007	1
log-likelihoods	ss	chr17	gencode::FASN::ENSG00000169710.6	FASN	168	1	0.274632	3.64124	0.115132	1
log-likelihoods	ss	chr4	gencode::PDS5A::ENSG00000121892.10	PDS5A	126	1	0.252239	3.96449	0.115362	1
log-likelihoods	ss	chr2	gencode::NT5DC4::ENSG00000144130.7	NT5DC4	64	1	0.138908	7.19899	0.115656	1
log-likelihoods	ss	chr7	gencode::NUP205::ENSG00000155561.10	NUP205	168	1	0.354867	2.81796	0.115686	1
log-likelihoods	ss	chr22	gencode::AIFM3::ENSG00000183773.11	AIFM3	82	1	0.175952	5.68338	0.115844	1
log-likelihoods	ss	chr4	gencode::TBC1D1::ENSG00000065882.11	TBC1D1	86	1	0.214669	4.65833	0.11659	1
log-likelihoods	ss	chr7	gencode::LMBR1::ENSG00000105983.15	LMBR1	72	1	0.224916	4.4461	0.116651	1
log-likelihoods	ss	chr11	gencode::ABTB2::ENSG00000166016.4	ABTB2	64	1	0.137712	7.26153	0.116737	1
log-likelihoods	ss	chr11	gencode::CLPB::ENSG00000162129.8	CLPB	70	1	0.124968	8.00204	0.116883	1
log-likelihoods	ss	chr9	gencode::EHMT1::ENSG00000181090.13	EHMT1	108	1	0.272311	3.67227	0.116897	1
log-likelihoods	ss	chr3	gencode::VPRBP::ENSG00000145041.11	VPRBP	64	1	0.126119	7.92904	0.116952	1
log-likelihoods	ss	chr9	gencode::NUP214::ENSG00000126883.12	NUP214	142	1	0.265776	3.76256	0.116955	1
log-likelihoods	ss	chr1	gencode::ARHGEF10L::ENSG00000074964.12	ARHGEF10L	118	1	0.231367	4.32213	0.117129	1
log-likelihoods	ss	chr2	gencode::PIKFYVE::ENSG00000115020.12	PIKFYVE	166	1	0.435447	2.29649	0.117172	1
log-likelihoods	ss	chr5	gencode::OSMR::ENSG00000145623.8	OSMR	68	1	0.179452	5.57251	0.11745	1
log-likelihoods	ss	chr11	gencode::TRIM49B::ENSG00000182053.8	TRIM49B	24	1	0.13577	7.36541	0.117477	1
log-likelihoods	ss	chr6	gencode::TCP10::ENSG00000203690.7	TCP10	36	1	0.204395	4.89249	0.1175	1
log-likelihoods	ss	chr17	gencode::MAP2K6::ENSG00000108984.9	MAP2K6	46	1	0.133974	7.46411	0.117668	1
log-likelihoods	ss	chr19	gencode::LILRA1::ENSG00000104974.6	LILRA1	36	1	0.131106	7.6274	0.117882	1
log-likelihoods	ss	chr4	gencode::FAM184B::ENSG00000047662.4	FAM184B	68	1	0.299654	3.33718	0.117994	1
log-likelihoods	ss	chr2	gencode::CAPN10::ENSG00000142330.15	CAPN10	52	1	0.14049	7.11794	0.118131	1
log-likelihoods	ss	chr20	gencode::TTLL9::ENSG00000131044.12	TTLL9	72	1	0.189673	5.27223	0.118142	1
log-likelihoods	ss	chr16	gencode::ITGAD::ENSG00000156886.11	ITGAD	116	1	0.399335	2.50416	0.118168	1
log-likelihoods	ss	chr8	gencode::PKHD1L1::ENSG00000205038.7	PKHD1L1	308	3	1.4166	2.11775	0.118245	1
log-likelihoods	ss	chr13	gencode::SCEL::ENSG00000136155.12	SCEL	128	1	0.502385	1.99051	0.118258	1
log-likelihoods	ss	chr7	gencode::TFEC::ENSG00000105967.11	TFEC	38	1	0.131796	7.58748	0.118425	1
log-likelihoods	ss	chr10	gencode::HK1::ENSG00000156515.17	HK1	98	1	0.170204	5.8753	0.118895	1
log-likelihoods	ss	chr4	gencode::EVC2::ENSG00000173040.8	EVC2	88	1	0.259415	3.85483	0.119242	1
log-likelihoods	ss	chr16	gencode::CRAMP1L::ENSG00000007545.11	CRAMP1L	84	1	0.16702	5.9873	0.119406	1
log-likelihoods	ss	chr1	gencode::ORC1::ENSG00000085840.8	ORC1	66	1	0.169258	5.90814	0.119975	1
log-likelihoods	ss	chr17	gencode::BZRAP1::ENSG00000005379.11	BZRAP1	124	1	0.287573	3.47738	0.119986	1
log-likelihoods	ss	chr11	gencode::NAT10::ENSG00000135372.4	NAT10	112	1	0.201029	4.97441	0.120013	1
log-likelihoods	ss	chr6	gencode::HLA-A::ENSG00000206503.7	HLA-A	36	1	0.176915	5.65244	0.1201	1
log-likelihoods	ss	chr3	gencode::CACNA2D3::ENSG00000157445.10	CACNA2D3	152	2	0.631577	3.16668	0.120163	1
log-likelihoods	ss	chr1	gencode::DCAF8::ENSG00000132716.14	DCAF8	78	1	0.159726	6.26071	0.120214	1
log-likelihoods	ss	chr17	gencode::TMEM104::ENSG00000109066.9	TMEM104	44	1	0.135351	7.38822	0.120323	1
log-likelihoods	ss	chr12	gencode::MYO1H::ENSG00000174527.5	MYO1H	124	1	0.422641	2.36607	0.120553	1
log-likelihoods	ss	chr3	gencode::IL5RA::ENSG00000091181.15	IL5RA	48	1	0.309264	3.23348	0.121294	1
log-likelihoods	ss	chr10	gencode::NRG3::ENSG00000185737.8	NRG3	52	1	0.315441	3.17017	0.121398	1
log-likelihoods	ss	chr11	gencode::ST5::ENSG00000166444.13	ST5	96	1	0.204653	4.88632	0.121836	1
log-likelihoods	ss	chr5	gencode::FAM13B::ENSG00000031003.6	FAM13B	92	1	0.218318	4.58047	0.121863	1
log-likelihoods	ss	chr1	gencode::ATP1A2::ENSG00000018625.10	ATP1A2	88	1	0.244128	4.09621	0.12189	1
log-likelihoods	ss	chr19	gencode::ATP8B3::ENSG00000130270.12	ATP8B3	112	1	0.245356	4.07571	0.122057	1
log-likelihoods	ss	chr6	gencode::SCUBE3::ENSG00000146197.7	SCUBE3	88	1	0.207862	4.81088	0.122122	1
log-likelihoods	ss	chr19	gencode::SIN3B::ENSG00000127511.5	SIN3B	72	1	0.152057	6.57649	0.122152	1
log-likelihoods	ss	chr9	gencode::FREM1::ENSG00000164946.15	FREM1	150	2	0.695717	2.87473	0.12232	1
log-likelihoods	ss	chr16	gencode::WASH4P::ENSG00000234769.4	WASH4P	36	1	0.132314	7.55778	0.122649	1
log-likelihoods	ss	chr4	gencode::RASGEF1B::ENSG00000138670.12	RASGEF1B	52	1	0.21305	4.69372	0.12267	1
log-likelihoods	ss	chr1	gencode::ZMYM6::ENSG00000163867.12	ZMYM6	66	1	0.19058	5.24714	0.12272	1
log-likelihoods	ss	chr9	gencode::TMEM245::ENSG00000106771.8	TMEM245	68	1	0.159606	6.26544	0.122839	1
log-likelihoods	ss	chr2	gencode::TPO::ENSG00000115705.16	TPO	68	1	0.369574	2.70582	0.123008	1
log-likelihoods	ss	chr5	gencode::TRIO::ENSG00000038382.13	TRIO	230	2	0.641	3.12012	0.123021	1
log-likelihoods	ss	chr20	gencode::EYA2::ENSG00000064655.14	EYA2	60	1	0.162377	6.1585	0.123182	1
log-likelihoods	ss	chr5	gencode::CDC20B::ENSG00000164287.8	CDC20B	50	1	0.135693	7.36958	0.123276	1
log-likelihoods	ss	chr1	gencode::ATP1A1::ENSG00000163399.11	ATP1A1	89	1	0.14125	7.07964	0.123452	1
log-likelihoods	ss	chr14	gencode::ADCY4::ENSG00000129467.9	ADCY4	98	1	0.185473	5.39161	0.123458	1
log-likelihoods	ss	chr17	gencode::TOP2A::ENSG00000131747.10	TOP2A	136	1	0.263411	3.79635	0.124046	1
log-likelihoods	ss	chr1	gencode::LAMC2::ENSG00000058085.10	LAMC2	86	1	0.210543	4.74962	0.124216	1
log-likelihoods	ss	chr11	gencode::CKAP5::ENSG00000175216.10	CKAP5	172	1	0.288781	3.46284	0.124289	1
log-likelihoods	ss	chr21	gencode::DIP2A::ENSG00000160305.13	DIP2A	146	1	0.365871	2.73321	0.124488	1
log-likelihoods	ss	chr3	gencode::CEP70::ENSG00000114107.4	CEP70	66	1	0.175008	5.71403	0.124666	1
log-likelihoods	ss	chr6	gencode::EPHA7::ENSG00000135333.9	EPHA7	62	1	0.292788	3.41544	0.124726	1
log-likelihoods	ss	chr3	gencode::TP63::ENSG00000073282.8	TP63	56	1	0.136445	7.32898	0.124806	1
log-likelihoods	ss	chr10	gencode::SORCS1::ENSG00000108018.11	SORCS1	106	1	0.421225	2.37403	0.124894	1
log-likelihoods	ss	chr4	gencode::F11::ENSG00000088926.9	F11	58	1	0.222635	4.49165	0.125545	1
log-likelihoods	ss	chr2	gencode::ANKAR::ENSG00000151687.10	ANKAR	88	1	0.299032	3.34413	0.125555	1
log-likelihoods	ss	chr12	gencode::SFSWAP::ENSG00000061936.5	SFSWAP	72	1	0.170345	5.87042	0.125649	1
log-likelihoods	ss	chr5	gencode::LARP1::ENSG00000155506.12	LARP1	72	1	0.135503	7.37992	0.125902	1
log-likelihoods	ss	chr18	gencode::DOK6::ENSG00000206052.6	DOK6	28	1	0.159981	6.25072	0.126427	1
log-likelihoods	ss	chr6	gencode::ENPP3::ENSG00000154269.10	ENPP3	106	1	0.345667	2.89296	0.12683	1
log-likelihoods	ss	chr3	gencode::CAPN7::ENSG00000131375.5	CAPN7	80	1	0.18356	5.44782	0.126926	1
log-likelihoods	ss	chr2	gencode::POTEE::ENSG00000188219.10	POTEE	56	1	0.173397	5.7671	0.127111	1
log-likelihoods	ss	chr19	gencode::CPT1C::ENSG00000169169.10	CPT1C	78	1	0.175475	5.69882	0.127262	1
log-likelihoods	ss	chr17	gencode::KIAA0100::ENSG00000007202.10	KIAA0100	154	1	0.27853	3.59028	0.127741	1
log-likelihoods	ss	chr1	gencode::WDR65::ENSG00000243710.3	WDR65	88	1	0.179949	5.55714	0.127822	1
log-likelihoods	ss	chr8	gencode::INTS8::ENSG00000164941.9	INTS8	104	1	0.186545	5.36064	0.127833	1
log-likelihoods	ss	chr4	gencode::CENPC::ENSG00000145241.6	CENPC	72	1	0.225677	4.43112	0.128363	1
log-likelihoods	ss	chr16	gencode::DNAH3::ENSG00000158486.9	DNAH3	244	1	0.591169	1.69156	0.128918	1
log-likelihoods	ss	chr1	gencode::LAMC1::ENSG00000135862.5	LAMC1	108	1	0.265327	3.76893	0.12898	1
log-likelihoods	ss	chr1	gencode::C8B::ENSG00000021852.8	C8B	52	1	0.27183	3.67877	0.129015	1
log-likelihoods	ss	chr3	gencode::KIAA1407::ENSG00000163617.6	KIAA1407	68	1	0.187938	5.32091	0.129075	1
log-likelihoods	ss	chr1	gencode::EPS8L3::ENSG00000198758.6	EPS8L3	72	1	0.190445	5.25086	0.129353	1
log-likelihoods	ss	chr3	gencode::APPL1::ENSG00000157500.6	APPL1	84	1	0.174666	5.72522	0.129557	1
log-likelihoods	ss	chr20	gencode::SIGLEC1::ENSG00000088827.8	SIGLEC1	80	1	0.216378	4.62155	0.130158	1
log-likelihoods	ss	chr7	gencode::WBSCR17::ENSG00000185274.7	WBSCR17	40	1	0.221402	4.51667	0.130356	1
log-likelihoods	ss	chr10	gencode::SLC39A12::ENSG00000148482.7	SLC39A12	48	1	0.159897	6.25402	0.131004	1
log-likelihoods	ss	chr2	gencode::SATB2::ENSG00000119042.12	SATB2	48	1	0.186347	5.36633	0.131121	1
log-likelihoods	ss	chr4	gencode::EMCN::ENSG00000164035.5	EMCN	44	1	0.177484	5.63432	0.131277	1
log-likelihoods	ss	chr4	gencode::ANXA10::ENSG00000109511.6	ANXA10	44	1	0.158668	6.30245	0.131301	1
log-likelihoods	ss	chr12	gencode::HPD::ENSG00000158104.7	HPD	58	1	0.153302	6.52309	0.131788	1
log-likelihoods	ss	chr2	gencode::DARS::ENSG00000115866.6	DARS	60	1	0.142954	6.99527	0.131947	1
log-likelihoods	ss	chr5	gencode::GABRA1::ENSG00000022355.10	GABRA1	48	1	0.287773	3.47496	0.131966	1
log-likelihoods	ss	chr1	gencode::COL11A1::ENSG00000060718.14	COL11A1	268	2	0.907072	2.2049	0.132287	1
log-likelihoods	ss	chr1	gencode::RXRG::ENSG00000143171.8	RXRG	36	1	0.145336	6.8806	0.132383	1
log-likelihoods	ss	chr20	gencode::RASSF2::ENSG00000101265.11	RASSF2	46	1	0.146745	6.81452	0.132767	1
log-likelihoods	ss	chr18	gencode::MYO5B::ENSG00000167306.14	MYO5B	156	1	0.387477	2.5808	0.133652	1
log-likelihoods	ss	chr12	gencode::APPL2::ENSG00000136044.7	APPL2	80	1	0.184963	5.40647	0.133949	1
log-likelihoods	ss	chr7	gencode::ETV1::ENSG00000006468.9	ETV1	64	1	0.246423	4.05806	0.133983	1
log-likelihoods	ss	chr10	gencode::SMC3::ENSG00000108055.9	SMC3	112	1	0.210577	4.74886	0.134197	1
log-likelihoods	ss	chr12	gencode::RIMBP2::ENSG00000060709.9	RIMBP2	90	1	0.389622	2.56659	0.134318	1
log-likelihoods	ss	chr2	gencode::SPATA3::ENSG00000173699.11	SPATA3	38	1	0.161072	6.20841	0.134657	1
log-likelihoods	ss	chr11	gencode::PHF21A::ENSG00000135365.11	PHF21A	72	1	0.176633	5.66145	0.13471	1
log-likelihoods	ss	chr8	gencode::ATAD2::ENSG00000156802.8	ATAD2	114	1	0.237574	4.20921	0.135311	1
log-likelihoods	ss	chr5	gencode::SKIV2L2::ENSG00000039123.11	SKIV2L2	104	1	0.160757	6.22057	0.13579	1
log-likelihoods	ss	chr2	gencode::SLC35F5::ENSG00000115084.8	SLC35F5	60	1	0.16733	5.97621	0.135914	1
log-likelihoods	ss	chr14	gencode::ARHGEF40::ENSG00000165801.5	ARHGEF40	92	1	0.18652	5.36137	0.136178	1
log-likelihoods	ss	chr15	gencode::TJP1::ENSG00000104067.12	TJP1	116	1	0.293455	3.40768	0.136295	1
log-likelihoods	ss	chr15	gencode::SV2B::ENSG00000185518.7	SV2B	48	1	0.163654	6.11047	0.136536	1
log-likelihoods	ss	chr2	gencode::THADA::ENSG00000115970.14	THADA	154	1	0.351413	2.84566	0.136633	1
log-likelihoods	ss	chr2	gencode::OBSL1::ENSG00000124006.10	OBSL1	82	1	0.206758	4.83658	0.136739	1
log-likelihoods	ss	chr2	gencode::HK2::ENSG00000159399.5	HK2	70	1	0.155371	6.4362	0.136807	1
log-likelihoods	ss	chr3	gencode::ATP2C1::ENSG00000017260.15	ATP2C1	112	1	0.210816	4.74347	0.136851	1
log-likelihoods	ss	chr11	gencode::ANO3::ENSG00000134343.8	ANO3	110	1	0.495588	2.0178	0.136871	1
log-likelihoods	ss	chr19	gencode::SAFB2::ENSG00000130254.7	SAFB2	80	1	0.165008	6.0603	0.137162	1
log-likelihoods	ss	chr3	gencode::OXSR1::ENSG00000172939.4	OXSR1	66	1	0.147631	6.77364	0.137656	1
log-likelihoods	ss	chr12	gencode::TBC1D15::ENSG00000121749.11	TBC1D15	72	1	0.218446	4.57779	0.13776	1
log-likelihoods	ss	chr4	gencode::GALNTL6::ENSG00000174473.11	GALNTL6	48	1	0.212858	4.69797	0.137947	1
log-likelihoods	ss	chr10	gencode::PNLIPRP1::ENSG00000187021.10	PNLIPRP1	52	1	0.268503	3.72436	0.138167	1
log-likelihoods	ss	chr3	gencode::PLXNB1::ENSG00000164050.8	PLXNB1	152	1	0.274756	3.6396	0.138213	1
log-likelihoods	ss	chr20	gencode::BPIFB3::ENSG00000186190.7	BPIFB3	56	1	0.234191	4.27001	0.138394	1
log-likelihoods	ss	chr19	gencode::KIR3DL1::ENSG00000167633.12	KIR3DL1	44	1	0.193978	5.15524	0.138712	1
log-likelihoods	ss	chr1	gencode::DAB1::ENSG00000173406.11	DAB1	72	1	0.413283	2.41965	0.138727	1
log-likelihoods	ss	chr5	gencode::DHX29::ENSG00000067248.5	DHX29	104	1	0.242386	4.12564	0.139274	1
log-likelihoods	ss	chr3	gencode::DNAH1::ENSG00000114841.13	DNAH1	308	2	0.684658	2.92116	0.140508	1
log-likelihoods	ss	chr5	gencode::SLC12A7::ENSG00000113504.15	SLC12A7	92	1	0.272709	3.66691	0.14069	1
log-likelihoods	ss	chr19	gencode::TCF3::ENSG00000071564.10	TCF3	80	1	0.153883	6.49846	0.140721	1
log-likelihoods	ss	chr3	gencode::FAM208A::ENSG00000163946.9	FAM208A	94	1	0.184803	5.41118	0.14113	1
log-likelihoods	ss	chr18	gencode::ANKRD62::ENSG00000181626.10	ANKRD62	52	1	0.160104	6.24596	0.141244	1
log-likelihoods	ss	chr1	gencode::CFHR1::ENSG00000244414.2	CFHR1	20	1	0.15545	6.43293	0.141477	1
log-likelihoods	ss	chr10	gencode::NRAP::ENSG00000197893.9	NRAP	164	2	0.761093	2.6278	0.141525	1
log-likelihoods	ss	chr6	gencode::VARS::ENSG00000204394.8	VARS	116	1	0.289709	3.45173	0.142152	1
log-likelihoods	ss	chr2	gencode::ZNF638::ENSG00000075292.14	ZNF638	116	1	0.281031	3.55833	0.142206	1
log-likelihoods	ss	chr16	gencode::GTF3C1::ENSG00000077235.13	GTF3C1	144	1	0.375056	2.66627	0.142295	1
log-likelihoods	ss	chr16	gencode::MAPK8IP3::ENSG00000138834.8	MAPK8IP3	124	1	0.257864	3.87801	0.142596	1
log-likelihoods	ss	chr12	gencode::C12orf42::ENSG00000179088.10	C12orf42	36	1	0.204843	4.8818	0.142628	1
log-likelihoods	ss	chr5	gencode::OXCT1::ENSG00000083720.8	OXCT1	70	1	0.207375	4.82219	0.142905	1
log-likelihoods	ss	chr5	gencode::MCTP1::ENSG00000175471.15	MCTP1	94	1	0.254538	3.92869	0.143077	1
log-likelihoods	ss	chr12	gencode::CCDC63::ENSG00000173093.8	CCDC63	44	1	0.158926	6.29225	0.143185	1
log-likelihoods	ss	chr14	gencode::C14orf164::ENSG00000215277.4	C14orf164	64	1	0.186939	5.34935	0.14338	1
log-likelihoods	ss	chr1	gencode::GCSAML::ENSG00000169224.8	GCSAML	28	1	0.159784	6.25847	0.143472	1
log-likelihoods	ss	chr17	gencode::MAP2K3::ENSG00000034152.14	MAP2K3	50	1	0.154406	6.47642	0.143504	1
log-likelihoods	ss	chr11	gencode::NAALAD2::ENSG00000077616.6	NAALAD2	70	1	0.372373	2.68548	0.143951	1
log-likelihoods	ss	chr8	gencode::SLC26A7::ENSG00000147606.4	SLC26A7	80	1	0.442468	2.26005	0.144089	1
log-likelihoods	ss	chr2	gencode::MYO1B::ENSG00000128641.13	MYO1B	122	1	0.28474	3.51197	0.1441	1
log-likelihoods	ss	chr7	gencode::KRBA1::ENSG00000133619.13	KRBA1	66	1	0.207191	4.82647	0.144109	1
log-likelihoods	ss	chr13	gencode::ATP11A::ENSG00000068650.14	ATP11A	118	1	0.303359	3.29642	0.144149	1
log-likelihoods	ss	chr14	gencode::CHD8::ENSG00000100888.8	CHD8	152	1	0.295725	3.38152	0.144476	1
log-likelihoods	ss	chr5	gencode::DDX46::ENSG00000145833.11	DDX46	88	1	0.179935	5.55756	0.144893	1
log-likelihoods	ss	chr1	gencode::SYCP1::ENSG00000198765.7	SYCP1	126	1	0.541499	1.84672	0.144951	1
log-likelihoods	ss	chr17	gencode::TAOK1::ENSG00000160551.5	TAOK1	76	1	0.157874	6.33416	0.145039	1
log-likelihoods	ss	chr5	gencode::GRM6::ENSG00000113262.10	GRM6	40	1	0.219175	4.56256	0.145553	1
log-likelihoods	ss	chr3	gencode::VPS8::ENSG00000156931.11	VPS8	186	1	0.508447	1.96678	0.145754	1
log-likelihoods	ss	chr6	gencode::BRD2::ENSG00000204256.8	BRD2	62	1	0.192904	5.18392	0.14599	1
log-likelihoods	ss	chr13	gencode::TPP2::ENSG00000134900.7	TPP2	116	1	0.306208	3.26575	0.146151	1
log-likelihoods	ss	chr11	gencode::SLC5A12::ENSG00000148942.10	SLC5A12	54	1	0.263453	3.79575	0.146881	1
log-likelihoods	ss	chr2	gencode::WDR35::ENSG00000118965.10	WDR35	108	1	0.237281	4.21441	0.147386	1
log-likelihoods	ss	chr12	gencode::C12orf55::ENSG00000188596.5	C12orf55	266	2	1.00089	1.99822	0.147651	1
log-likelihoods	ss	chr5	gencode::ANKHD1-EIF4EBP3::ENSG00000254996.1	ANKHD1-EIF4EBP3	140	1	0.181728	5.50274	0.14856	1
log-likelihoods	ss	chr6	gencode::CDC40::ENSG00000168438.10	CDC40	62	1	0.178328	5.60766	0.149096	1
log-likelihoods	ss	chr18	gencode::KLHL14::ENSG00000197705.5	KLHL14	34	1	0.173963	5.74836	0.149461	1
log-likelihoods	ss	chr15	gencode::UACA::ENSG00000137831.10	UACA	74	1	0.182954	5.46587	0.149499	1
log-likelihoods	ss	chr12	gencode::R3HDM2::ENSG00000179912.15	R3HDM2	110	1	0.214137	4.66992	0.15015	1
log-likelihoods	ss	chr16	gencode::XPO6::ENSG00000169180.7	XPO6	96	1	0.219424	4.5574	0.150406	1
log-likelihoods	ss	chr17	gencode::NLRP1::ENSG00000091592.11	NLRP1	70	1	0.209373	4.77617	0.15042	1
log-likelihoods	ss	chr6	gencode::FNDC1::ENSG00000164694.12	FNDC1	88	1	0.304647	3.28249	0.151174	1
log-likelihoods	ss	chr4	gencode::ANTXR2::ENSG00000163297.12	ANTXR2	66	1	0.241647	4.13828	0.151219	1
log-likelihoods	ss	chr2	gencode::MROH2A::ENSG00000185038.10	MROH2A	164	1	0.567859	1.761	0.15132	1
log-likelihoods	ss	chr1	gencode::TTC34::ENSG00000215912.7	TTC34	38	1	0.203843	4.90573	0.151362	1
log-likelihoods	ss	chr9	gencode::CBWD1::ENSG00000172785.14	CBWD1	58	1	0.165155	6.05491	0.151606	1
log-likelihoods	ss	chr19	gencode::MYO9B::ENSG00000099331.9	MYO9B	156	1	0.310055	3.22524	0.152027	1
log-likelihoods	ss	chr17	gencode::MYO19::ENSG00000141140.12	MYO19	98	1	0.192031	5.20749	0.152114	1
log-likelihoods	ss	chr17	gencode::BCAS3::ENSG00000141376.16	BCAS3	108	1	0.299768	3.33591	0.152475	1
log-likelihoods	ss	chr2	gencode::ARHGEF33::ENSG00000214694.6	ARHGEF33	68	1	0.188607	5.30203	0.152542	1
log-likelihoods	ss	chr5	gencode::TCERG1::ENSG00000113649.7	TCERG1	84	1	0.211189	4.73509	0.152648	1
log-likelihoods	ss	chr19	gencode::CPAMD8::ENSG00000160111.8	CPAMD8	164	1	0.459407	2.17672	0.152727	1
log-likelihoods	ss	chr9	gencode::SVEP1::ENSG00000165124.13	SVEP1	188	1	0.49757	2.00977	0.153059	1
log-likelihoods	ss	chr16	gencode::TMC5::ENSG00000103534.12	TMC5	94	1	0.215717	4.63571	0.153235	1
log-likelihoods	ss	chr2	gencode::AGAP1::ENSG00000157985.13	AGAP1	72	1	0.207919	4.80957	0.153337	1
log-likelihoods	ss	chr5	gencode::ANKHD1::ENSG00000131503.16	ANKHD1	144	1	0.18853	5.3042	0.15363	1
log-likelihoods	ss	chr7	gencode::LRGUK::ENSG00000155530.2	LRGUK	76	1	0.308646	3.23995	0.153921	1
log-likelihoods	ss	chr12	gencode::APAF1::ENSG00000120868.9	APAF1	102	1	0.182403	5.48236	0.154083	1
log-likelihoods	ss	chr21	gencode::LTN1::ENSG00000198862.9	LTN1	122	1	0.294678	3.39353	0.154129	1
log-likelihoods	ss	chr5	gencode::SLC6A18::ENSG00000164363.8	SLC6A18	42	1	0.19443	5.14323	0.154605	1
log-likelihoods	ss	chr8	gencode::TUSC3::ENSG00000104723.16	TUSC3	42	1	0.167705	5.96286	0.154855	1
log-likelihoods	ss	chr7	gencode::TRPV6::ENSG00000165125.13	TRPV6	56	1	0.227026	4.40478	0.154946	1
log-likelihoods	ss	chr14	gencode::GALC::ENSG00000054983.12	GALC	70	1	0.290004	3.44823	0.15507	1
log-likelihoods	ss	chr1	gencode::COL9A2::ENSG00000049089.9	COL9A2	124	1	0.290495	3.4424	0.155146	1
log-likelihoods	ss	chr11	gencode::MICAL2::ENSG00000133816.9	MICAL2	108	1	0.228534	4.37572	0.155149	1
log-likelihoods	ss	chr17	gencode::ACE::ENSG00000159640.10	ACE	170	1	0.412207	2.42597	0.155349	1
log-likelihoods	ss	chr7	gencode::ELMO1::ENSG00000155849.11	ELMO1	94	1	0.379725	2.63348	0.155373	1
log-likelihoods	ss	chr19	gencode::POLD1::ENSG00000062822.8	POLD1	106	1	0.272577	3.66869	0.155512	1
log-likelihoods	ss	chr10	gencode::CCDC7::ENSG00000216937.7	CCDC7	72	1	0.279463	3.57829	0.155579	1
log-likelihoods	ss	chr6	gencode::CD2AP::ENSG00000198087.7	CD2AP	68	1	0.184002	5.43473	0.155721	1
log-likelihoods	ss	chr8	gencode::ADAM7::ENSG00000069206.11	ADAM7	90	1	0.458163	2.18263	0.155814	1
log-likelihoods	ss	chr2	gencode::ITSN2::ENSG00000198399.10	ITSN2	154	1	0.35477	2.81873	0.156276	1
log-likelihoods	ss	chr3	gencode::WDR49::ENSG00000174776.6	WDR49	78	1	0.390954	2.55784	0.156947	1
log-likelihoods	ss	chr8	gencode::ZFAT::ENSG00000066827.11	ZFAT	66	1	0.251136	3.98191	0.15763	1
log-likelihoods	ss	chr11	gencode::TPCN2::ENSG00000162341.11	TPCN2	96	1	0.302772	3.30282	0.158011	1
log-likelihoods	ss	chr19	gencode::NOTCH3::ENSG00000074181.4	NOTCH3	128	1	0.276443	3.61738	0.158289	1
log-likelihoods	ss	chr6	gencode::PPP1R10::ENSG00000204569.5	PPP1R10	76	1	0.238931	4.1853	0.158415	1
log-likelihoods	ss	chr10	gencode::PLCE1::ENSG00000138193.10	PLCE1	130	1	0.405785	2.46436	0.158717	1
log-likelihoods	ss	chr2	gencode::NEB::ENSG00000183091.15	NEB	728	4	2.80704	1.42499	0.159169	1
log-likelihoods	ss	chr15	gencode::GABRA5::ENSG00000186297.7	GABRA5	42	1	0.207097	4.82866	0.159442	1
log-likelihoods	ss	chr8	gencode::EFR3A::ENSG00000132294.9	EFR3A	92	1	0.331544	3.01619	0.159462	1
log-likelihoods	ss	chr7	gencode::NOS3::ENSG00000164867.6	NOS3	108	1	0.28397	3.5215	0.159783	1
log-likelihoods	ss	chr11	gencode::CDON::ENSG00000064309.10	CDON	76	1	0.183484	5.45008	0.160342	1
log-likelihoods	ss	chr2	gencode::COL3A1::ENSG00000168542.8	COL3A1	204	1	0.449501	2.22469	0.160437	1
log-likelihoods	ss	chr4	gencode::WHSC1::ENSG00000109685.13	WHSC1	96	1	0.174573	5.72825	0.16065	1
log-likelihoods	ss	chr5	gencode::ITGA2::ENSG00000164171.6	ITGA2	116	1	0.278007	3.59704	0.16087	1
log-likelihoods	ss	chr7	gencode::LAMB1::ENSG00000091136.9	LAMB1	128	1	0.303638	3.2934	0.161219	1
log-likelihoods	ss	chr1	gencode::CCDC18::ENSG00000122483.13	CCDC18	114	1	0.296825	3.36899	0.161959	1
log-likelihoods	ss	chr12	gencode::ATF7IP::ENSG00000171681.8	ATF7IP	56	1	0.214188	4.66879	0.162824	1
log-likelihoods	ss	chr2	gencode::TNS1::ENSG00000079308.12	TNS1	132	1	0.307113	3.25613	0.163153	1
log-likelihoods	ss	chr2	gencode::CLASP1::ENSG00000074054.13	CLASP1	180	1	0.509339	1.96333	0.163447	1
log-likelihoods	ss	chr9	gencode::C9orf84::ENSG00000165181.12	C9orf84	110	1	0.265649	3.76436	0.163942	1
log-likelihoods	ss	chr2	gencode::RANBP2::ENSG00000153201.11	RANBP2	112	1	0.254302	3.93233	0.164617	1
log-likelihoods	ss	chr2	gencode::EXOC6B::ENSG00000144036.10	EXOC6B	82	1	0.248464	4.02472	0.164882	1
log-likelihoods	ss	chr9	gencode::PAPPA::ENSG00000182752.8	PAPPA	84	1	0.251193	3.981	0.165321	1
log-likelihoods	ss	chr1	gencode::EVI5::ENSG00000067208.10	EVI5	76	1	0.206109	4.85181	0.165389	1
log-likelihoods	ss	chr2	gencode::POTEF::ENSG00000196604.7	POTEF	64	1	0.258312	3.87129	0.165604	1
log-likelihoods	ss	chr22	gencode::SCUBE1::ENSG00000159307.14	SCUBE1	86	1	0.267712	3.73535	0.165878	1
log-likelihoods	ss	chr1	gencode::GRIK3::ENSG00000163873.5	GRIK3	58	1	0.238555	4.1919	0.165986	1
log-likelihoods	ss	chr14	gencode::SYNE3::ENSG00000176438.8	SYNE3	60	1	0.204743	4.88418	0.166524	1
log-likelihoods	ss	chr7	gencode::AGK::ENSG00000006530.11	AGK	66	1	0.231339	4.32266	0.166586	1
log-likelihoods	ss	chr5	gencode::IQGAP2::ENSG00000145703.11	IQGAP2	144	1	0.366396	2.72928	0.166836	1
log-likelihoods	ss	chr17	gencode::ITGAE::ENSG00000083457.7	ITGAE	120	1	0.206234	4.84886	0.166955	1
log-likelihoods	ss	chr1	gencode::MAST2::ENSG00000086015.16	MAST2	112	1	0.219514	4.55552	0.16715	1
log-likelihoods	ss	chr1	gencode::SUCO::ENSG00000094975.9	SUCO	96	1	0.230798	4.33279	0.167539	1
log-likelihoods	ss	chr20	gencode::CDH4::ENSG00000179242.11	CDH4	62	1	0.296712	3.37027	0.1678	1
log-likelihoods	ss	chr9	gencode::VLDLR::ENSG00000147852.11	VLDLR	72	1	0.202147	4.94689	0.167937	1
log-likelihoods	ss	chr3	gencode::U2SURP::ENSG00000163714.13	U2SURP	108	1	0.245924	4.0663	0.168095	1
log-likelihoods	ss	chr19	gencode::LTBP4::ENSG00000090006.13	LTBP4	132	1	0.288871	3.46175	0.168228	1
log-likelihoods	ss	chr1	gencode::LEPR::ENSG00000116678.14	LEPR	82	1	0.196438	5.09067	0.16897	1
log-likelihoods	ss	chr17	gencode::MYO15A::ENSG00000091536.12	MYO15A	260	1	0.609907	1.63959	0.170164	1
log-likelihoods	ss	chr16	gencode::PMFBP1::ENSG00000118557.11	PMFBP1	84	1	0.239699	4.1719	0.170208	1
log-likelihoods	ss	chr3	gencode::EFHB::ENSG00000163576.13	EFHB	54	1	0.258899	3.86251	0.170378	1
log-likelihoods	ss	chr7	gencode::TRRAP::ENSG00000196367.8	TRRAP	284	1	0.698858	1.43091	0.170865	1
log-likelihoods	ss	chr4	gencode::FRYL::ENSG00000075539.9	FRYL	252	1	0.585139	1.709	0.171022	1
log-likelihoods	ss	chr3	gencode::BOC::ENSG00000144857.10	BOC	80	1	0.212537	4.70506	0.171144	1
log-likelihoods	ss	chr11	gencode::PAX6::ENSG00000007372.16	PAX6	58	1	0.241597	4.13912	0.171563	1
log-likelihoods	ss	chr3	gencode::SCN10A::ENSG00000185313.6	SCN10A	104	1	0.515385	1.9403	0.172055	1
log-likelihoods	ss	chr11	gencode::KIAA1549L::ENSG00000110427.10	KIAA1549L	76	1	0.269954	3.70433	0.172301	1
log-likelihoods	ss	chr11	gencode::TRPC6::ENSG00000137672.8	TRPC6	48	1	0.260006	3.84606	0.17304	1
log-likelihoods	ss	chr17	gencode::SLC4A1::ENSG00000004939.9	SLC4A1	76	1	0.20967	4.76939	0.173088	1
log-likelihoods	ss	chr5	gencode::HSD17B4::ENSG00000133835.10	HSD17B4	104	1	0.224054	4.46321	0.174025	1
log-likelihoods	ss	chr8	gencode::UNC5D::ENSG00000156687.6	UNC5D	72	1	0.423114	2.36343	0.174346	1
log-likelihoods	ss	chr4	gencode::TRAPPC11::ENSG00000168538.11	TRAPPC11	114	1	0.221688	4.51084	0.175097	1
log-likelihoods	ss	chr7	gencode::IQUB::ENSG00000164675.6	IQUB	52	1	0.229653	4.3544	0.175157	1
log-likelihoods	ss	chr3	gencode::ESYT3::ENSG00000158220.9	ESYT3	86	1	0.238893	4.18598	0.175534	1
log-likelihoods	ss	chr15	gencode::MGA::ENSG00000174197.12	MGA	92	1	0.192917	5.18358	0.175957	1
log-likelihoods	ss	chr3	gencode::ANKRD28::ENSG00000206560.6	ANKRD28	110	1	0.229397	4.35926	0.176034	1
log-likelihoods	ss	chr14	gencode::DAAM1::ENSG00000100592.11	DAAM1	98	1	0.246313	4.05988	0.176216	1
log-likelihoods	ss	chr8	gencode::HNF4G::ENSG00000164749.7	HNF4G	42	1	0.196879	5.07925	0.176365	1
log-likelihoods	ss	chr11	gencode::USP28::ENSG00000048028.7	USP28	92	1	0.248776	4.01968	0.176532	1
log-likelihoods	ss	chr13	gencode::MTUS2::ENSG00000132938.14	MTUS2	54	1	0.226315	4.41861	0.176554	1
log-likelihoods	ss	chr12	gencode::C12orf40::ENSG00000180116.11	C12orf40	48	1	0.220928	4.52636	0.176581	1
log-likelihoods	ss	chr1	gencode::RGL1::ENSG00000143344.11	RGL1	78	1	0.209362	4.77641	0.17688	1
log-likelihoods	ss	chr16	gencode::ITGAM::ENSG00000169896.12	ITGAM	116	1	0.27754	3.60308	0.17709	1
log-likelihoods	ss	chr2	gencode::SCN3A::ENSG00000153253.11	SCN3A	114	1	0.406978	2.45714	0.177114	1
log-likelihoods	ss	chr1	gencode::PTPN14::ENSG00000152104.7	PTPN14	72	1	0.197941	5.05201	0.178209	1
log-likelihoods	ss	chr20	gencode::BPIFB4::ENSG00000186191.7	BPIFB4	60	1	0.218084	4.58538	0.178868	1
log-likelihoods	ss	chr8	gencode::HHLA1::ENSG00000132297.7	HHLA1	70	1	0.354992	2.81697	0.178937	1
log-likelihoods	ss	chr15	gencode::FANCI::ENSG00000140525.13	FANCI	156	1	0.262379	3.81127	0.178969	1
log-likelihoods	ss	chr14	gencode::LRRC16B::ENSG00000186648.10	LRRC16B	156	1	0.385118	2.59661	0.179019	1
log-likelihoods	ss	chr1	gencode::NUF2::ENSG00000143228.8	NUF2	54	1	0.21834	4.58	0.179242	1
log-likelihoods	ss	chr3	gencode::CNTN4::ENSG00000144619.10	CNTN4	102	1	0.578773	1.72779	0.180008	1
log-likelihoods	ss	chr8	gencode::FER1L6::ENSG00000214814.2	FER1L6	160	1	0.61507	1.62583	0.180245	1
log-likelihoods	ss	chr4	gencode::GRID2::ENSG00000152208.7	GRID2	60	1	0.341823	2.92549	0.180887	1
log-likelihoods	ss	chr4	gencode::RXFP1::ENSG00000171509.11	RXFP1	84	1	0.30674	3.26009	0.181515	1
log-likelihoods	ss	chr17	gencode::MYH4::ENSG00000264424.1	MYH4	156	2	0.833865	2.39847	0.181575	1
log-likelihoods	ss	chr12	gencode::ARID2::ENSG00000189079.11	ARID2	82	1	0.229267	4.36173	0.182972	1
log-likelihoods	ss	chr4	gencode::TLL1::ENSG00000038295.3	TLL1	86	1	0.273412	3.65749	0.182982	1
log-likelihoods	ss	chr20	gencode::MACROD2::ENSG00000172264.12	MACROD2	72	1	0.22477	4.44899	0.183041	1
log-likelihoods	ss	chr17	gencode::FMNL1::ENSG00000184922.9	FMNL1	104	1	0.211033	4.73859	0.184069	1
log-likelihoods	ss	chr7	gencode::NRCAM::ENSG00000091129.15	NRCAM	138	1	0.410141	2.43819	0.184359	1
log-likelihoods	ss	chr9	gencode::SARDH::ENSG00000123453.12	SARDH	86	1	0.254179	3.93424	0.185122	1
log-likelihoods	ss	chr9	gencode::ADAMTSL1::ENSG00000178031.11	ADAMTSL1	104	1	0.311612	3.20912	0.185251	1
log-likelihoods	ss	chr2	gencode::NBEAL1::ENSG00000144426.14	NBEAL1	216	1	0.59709	1.67479	0.186236	1
log-likelihoods	ss	chr3	gencode::SEMA5B::ENSG00000082684.10	SEMA5B	90	1	0.234568	4.26315	0.186245	1
log-likelihoods	ss	chr3	gencode::ITPR1::ENSG00000150995.13	ITPR1	242	1	0.538041	1.85859	0.186248	1
log-likelihoods	ss	chr11	gencode::MRVI1::ENSG00000072952.14	MRVI1	90	1	0.237846	4.20439	0.18652	1
log-likelihoods	ss	chr3	gencode::CBLB::ENSG00000114423.14	CBLB	78	1	0.223188	4.48052	0.186963	1
log-likelihoods	ss	chr3	gencode::RAD54L2::ENSG00000164080.9	RAD54L2	84	1	0.232118	4.30815	0.187695	1
log-likelihoods	ss	chr2	gencode::FARP2::ENSG00000006607.9	FARP2	108	1	0.233174	4.28865	0.187985	1
log-likelihoods	ss	chr15	gencode::GABRB3::ENSG00000166206.9	GABRB3	44	1	0.232218	4.30629	0.188678	1
log-likelihoods	ss	chr3	gencode::CADM2::ENSG00000175161.9	CADM2	38	1	0.24482	4.08464	0.188902	1
log-likelihoods	ss	chr2	gencode::DYTN::ENSG00000232125.2	DYTN	44	1	0.232012	4.31012	0.189472	1
log-likelihoods	ss	chr14	gencode::SLC24A4::ENSG00000140090.13	SLC24A4	70	1	0.282897	3.53486	0.189766	1
log-likelihoods	ss	chr4	gencode::TENM3::ENSG00000218336.3	TENM3	108	1	0.350916	2.84969	0.189825	1
log-likelihoods	ss	chr2	gencode::ANO7::ENSG00000146205.9	ANO7	92	1	0.230855	4.33173	0.190032	1
log-likelihoods	ss	chr8	gencode::DOCK5::ENSG00000147459.13	DOCK5	204	1	0.553511	1.80665	0.190222	1
log-likelihoods	ss	chr12	gencode::MYBPC1::ENSG00000196091.8	MYBPC1	132	1	0.485557	2.05949	0.190736	1
log-likelihoods	ss	chr22	gencode::LARGE::ENSG00000133424.16	LARGE	64	1	0.253482	3.94505	0.190848	1
log-likelihoods	ss	chr16	gencode::PDPR::ENSG00000090857.9	PDPR	80	1	0.227818	4.38946	0.191832	1
log-likelihoods	ss	chr18	gencode::ROCK1::ENSG00000067900.6	ROCK1	128	1	0.323546	3.09075	0.192642	1
log-likelihoods	ss	chr3	gencode::COL6A6::ENSG00000206384.6	COL6A6	144	1	0.497767	2.00897	0.19335	1
log-likelihoods	ss	chr10	gencode::COL13A1::ENSG00000197467.9	COL13A1	164	1	0.499329	2.00269	0.193926	1
log-likelihoods	ss	chr18	gencode::POTEC::ENSG00000183206.12	POTEC	40	1	0.245848	4.06755	0.194661	1
log-likelihoods	ss	chr2	gencode::SP100::ENSG00000067066.12	SP100	122	1	0.360903	2.77083	0.194665	1
log-likelihoods	ss	chr2	gencode::MYO3B::ENSG00000071909.14	MYO3B	138	1	0.589799	1.69549	0.194848	1
log-likelihoods	ss	chr17	gencode::CCDC144A::ENSG00000170160.12	CCDC144A	104	1	0.346647	2.88478	0.194884	1
log-likelihoods	ss	chr5	gencode::SLCO6A1::ENSG00000205359.5	SLCO6A1	54	1	0.337367	2.96413	0.194939	1
log-likelihoods	ss	chr16	gencode::PHKB::ENSG00000102893.11	PHKB	128	1	0.428654	2.33289	0.195093	1
log-likelihoods	ss	chr5	gencode::NUP155::ENSG00000113569.11	NUP155	138	1	0.273704	3.65358	0.195276	1
log-likelihoods	ss	chr5	gencode::CDH9::ENSG00000113100.5	CDH9	44	1	0.273882	3.6512	0.195292	1
log-likelihoods	ss	chr9	gencode::SETX::ENSG00000107290.9	SETX	104	1	0.266827	3.74774	0.195462	1
log-likelihoods	ss	chr18	gencode::LAMA1::ENSG00000101680.9	LAMA1	248	1	0.557907	1.79241	0.195713	1
log-likelihoods	ss	chr3	gencode::KIF15::ENSG00000163808.12	KIF15	138	1	0.336593	2.97095	0.195915	1
log-likelihoods	ss	chr18	gencode::FHOD3::ENSG00000134775.11	FHOD3	114	1	0.368482	2.71384	0.19613	1
log-likelihoods	ss	chr10	gencode::SORCS3::ENSG00000156395.8	SORCS3	108	1	0.695507	1.4378	0.196353	1
log-likelihoods	ss	chr6	gencode::SLC17A3::ENSG00000124564.13	SLC17A3	50	1	0.228118	4.3837	0.197103	1
log-likelihoods	ss	chr12	gencode::PLCZ1::ENSG00000139151.10	PLCZ1	62	1	0.318805	3.13671	0.197333	1
log-likelihoods	ss	chr15	gencode::PLA2G4D::ENSG00000159337.6	PLA2G4D	76	1	0.219479	4.55625	0.197628	1
log-likelihoods	ss	chr14	gencode::TEP1::ENSG00000129566.8	TEP1	216	1	0.531632	1.881	0.197858	1
log-likelihoods	ss	chr7	gencode::ASB15::ENSG00000146809.8	ASB15	56	1	0.232426	4.30245	0.197991	1
log-likelihoods	ss	chr15	gencode::RYR3::ENSG00000198838.7	RYR3	412	3	1.61374	1.85903	0.198248	1
log-likelihoods	ss	chr13	gencode::NALCN::ENSG00000102452.11	NALCN	176	1	0.803181	1.24505	0.198988	1
log-likelihoods	ss	chr5	gencode::SV2C::ENSG00000122012.9	SV2C	50	1	0.258906	3.86241	0.200235	1
log-likelihoods	ss	chr1	gencode::KDM5B::ENSG00000117139.12	KDM5B	108	1	0.227487	4.39586	0.20033	1
log-likelihoods	ss	chr6	gencode::BAI3::ENSG00000135298.9	BAI3	128	1	0.78667	1.27118	0.200509	1
log-likelihoods	ss	chr3	gencode::EPHA6::ENSG00000080224.13	EPHA6	92	1	0.51445	1.94383	0.20068	1
log-likelihoods	ss	chr1	gencode::F5::ENSG00000198734.6	F5	96	1	0.26869	3.72177	0.20161	1
log-likelihoods	ss	chr19	gencode::TDRD12::ENSG00000173809.11	TDRD12	110	1	0.401937	2.48795	0.201713	1
log-likelihoods	ss	chr14	gencode::DYNC1H1::ENSG00000197102.6	DYNC1H1	308	1	0.523918	1.9087	0.20291	1
log-likelihoods	ss	chr2	gencode::TSGA10::ENSG00000135951.10	TSGA10	88	1	0.294864	3.3914	0.203021	1
log-likelihoods	ss	chr5	gencode::FCHO2::ENSG00000157107.9	FCHO2	106	1	0.263804	3.79069	0.204495	1
log-likelihoods	ss	chr20	gencode::PREX1::ENSG00000124126.9	PREX1	152	1	0.379499	2.63506	0.205164	1
log-likelihoods	ss	chr10	gencode::CTNNA3::ENSG00000183230.12	CTNNA3	70	1	0.391127	2.55672	0.205407	1
log-likelihoods	ss	chr4	gencode::NEK1::ENSG00000137601.11	NEK1	140	1	0.320254	3.12252	0.207577	1
log-likelihoods	ss	chr10	gencode::WDR11::ENSG00000120008.11	WDR11	112	1	0.311524	3.21003	0.207853	1
log-likelihoods	ss	chr8	gencode::CNBD1::ENSG00000176571.7	CNBD1	40	1	0.236237	4.23304	0.208503	1
log-likelihoods	ss	chr2	gencode::PLEKHH2::ENSG00000152527.9	PLEKHH2	116	1	0.280983	3.55894	0.209218	1
log-likelihoods	ss	chr5	gencode::RASA1::ENSG00000145715.10	RASA1	106	1	0.311729	3.20792	0.209268	1
log-likelihoods	ss	chr3	gencode::SRGAP3::ENSG00000196220.11	SRGAP3	88	1	0.245547	4.07255	0.209731	1
log-likelihoods	ss	chr3	gencode::FLNB::ENSG00000136068.10	FLNB	190	1	0.311751	3.20769	0.210043	1
log-likelihoods	ss	chr4	gencode::PDGFRA::ENSG00000134853.7	PDGFRA	86	1	0.264585	3.7795	0.211485	1
log-likelihoods	ss	chr4	gencode::PRDM5::ENSG00000138738.6	PRDM5	62	1	0.277369	3.60531	0.212674	1
log-likelihoods	ss	chr11	gencode::NRXN2::ENSG00000110076.14	NRXN2	90	1	0.272219	3.67352	0.21287	1
log-likelihoods	ss	chr7	gencode::CUX1::ENSG00000257923.5	CUX1	128	1	0.29696	3.36746	0.214106	1
log-likelihoods	ss	chr16	gencode::CDH8::ENSG00000150394.9	CDH8	46	1	0.24806	4.03129	0.215853	1
log-likelihoods	ss	chr10	gencode::C10orf112::ENSG00000204740.5	C10orf112	100	1	0.625257	1.59934	0.215934	1
log-likelihoods	ss	chr19	gencode::PTPRS::ENSG00000105426.10	PTPRS	151	1	0.285088	3.50769	0.216867	1
log-likelihoods	ss	chr15	gencode::WDR72::ENSG00000166415.10	WDR72	80	1	0.366201	2.73074	0.217867	1
log-likelihoods	ss	chr17	gencode::SCN4A::ENSG00000007314.7	SCN4A	92	1	0.320234	3.12271	0.219861	1
log-likelihoods	ss	chr2	gencode::FMNL2::ENSG00000157827.15	FMNL2	108	1	0.300162	3.33153	0.220183	1
log-likelihoods	ss	chr9	gencode::CACNA1B::ENSG00000148408.8	CACNA1B	206	2	0.942253	2.12257	0.22033	1
log-likelihoods	ss	chr20	gencode::DZANK1::ENSG00000089091.12	DZANK1	96	1	0.267825	3.73378	0.220799	1
log-likelihoods	ss	chr1	gencode::SZT2::ENSG00000198198.9	SZT2	282	1	0.434703	2.30042	0.222442	1
log-likelihoods	ss	chr7	gencode::KEL::ENSG00000197993.3	KEL	72	1	0.314837	3.17625	0.222975	1
log-likelihoods	ss	chr1	gencode::HSPG2::ENSG00000142798.12	HSPG2	388	1	0.54729	1.82718	0.223296	1
log-likelihoods	ss	chr9	gencode::SMC2::ENSG00000136824.14	SMC2	102	1	0.337791	2.96041	0.223342	1
log-likelihoods	ss	chr10	gencode::ARMC3::ENSG00000165309.9	ARMC3	74	1	0.261608	3.82251	0.223817	1
log-likelihoods	ss	chr10	gencode::WDR96::ENSG00000197748.8	WDR96	142	1	0.392729	2.54628	0.224197	1
log-likelihoods	ss	chr3	gencode::SLC4A7::ENSG00000033867.12	SLC4A7	102	1	0.253056	3.95169	0.224205	1
log-likelihoods	ss	chr2	gencode::COL6A3::ENSG00000163359.11	COL6A3	170	1	0.363679	2.74968	0.224727	1
log-likelihoods	ss	chr2	gencode::ALK::ENSG00000171094.11	ALK	116	1	0.419874	2.38167	0.225244	1
log-likelihoods	ss	chr14	gencode::CATSPERB::ENSG00000133962.3	CATSPERB	104	1	0.361752	2.76433	0.226289	1
log-likelihoods	ss	chr3	gencode::FXR1::ENSG00000114416.13	FXR1	72	1	0.256402	3.90013	0.226815	1
log-likelihoods	ss	chr3	gencode::CNTN6::ENSG00000134115.8	CNTN6	90	1	0.471033	2.12299	0.227813	1
log-likelihoods	ss	chr3	gencode::ATR::ENSG00000175054.10	ATR	184	1	0.433318	2.30777	0.229883	1
log-likelihoods	ss	chr11	gencode::CWF19L2::ENSG00000152404.11	CWF19L2	70	1	0.277447	3.60429	0.231982	1
log-likelihoods	ss	chr2	gencode::PTPN4::ENSG00000088179.4	PTPN4	106	1	0.290106	3.44702	0.232845	1
log-likelihoods	ss	chr6	gencode::REV3L::ENSG00000009413.11	REV3L	136	1	0.340089	2.94041	0.233255	1
log-likelihoods	ss	chr4	gencode::CORIN::ENSG00000145244.7	CORIN	84	1	0.282774	3.5364	0.233424	1
log-likelihoods	ss	chr12	gencode::NOS1::ENSG00000089250.14	NOS1	120	1	0.351139	2.84788	0.233601	1
log-likelihoods	ss	chr2	gencode::ATAD2B::ENSG00000119778.10	ATAD2B	108	1	0.269413	3.71177	0.234187	1
log-likelihoods	ss	chr17	gencode::MYH2::ENSG00000125414.14	MYH2	158	1	0.807911	1.23776	0.23609	1
log-likelihoods	ss	chr6	gencode::MED23::ENSG00000112282.13	MED23	122	1	0.410252	2.43752	0.23675	1
log-likelihoods	ss	chr8	gencode::KIF13B::ENSG00000197892.8	KIF13B	154	1	0.345604	2.89349	0.236945	1
log-likelihoods	ss	chr9	gencode::ANKRD18A::ENSG00000180071.14	ANKRD18A	84	1	0.437845	2.28391	0.237732	1
log-likelihoods	ss	chr11	gencode::OVCH2::ENSG00000183378.7	OVCH2	56	1	0.310627	3.2193	0.238255	1
log-likelihoods	ss	chr8	gencode::CSMD3::ENSG00000164796.13	CSMD3	286	2	1.416	1.41243	0.238309	1
log-likelihoods	ss	chr3	gencode::STAG1::ENSG00000118007.8	STAG1	144	1	0.320675	3.11842	0.238823	1
log-likelihoods	ss	chr1	gencode::MSH4::ENSG00000057468.6	MSH4	76	1	0.302045	3.31077	0.239354	1
log-likelihoods	ss	chr3	gencode::PIK3CA::ENSG00000121879.3	PIK3CA	80	1	0.291151	3.43464	0.240875	1
log-likelihoods	ss	chr7	gencode::NCAPG2::ENSG00000146918.15	NCAPG2	116	1	0.303255	3.29755	0.241013	1
log-likelihoods	ss	chr10	gencode::CDH23::ENSG00000107736.15	CDH23	278	1	0.531222	1.88245	0.243045	1
log-likelihoods	ss	chr6	gencode::PKHD1::ENSG00000170927.10	PKHD1	266	2	1.3311	1.50252	0.243542	1
log-likelihoods	ss	chr12	gencode::ABCC9::ENSG00000069431.6	ABCC9	166	1	0.779267	1.28326	0.243963	1
log-likelihoods	ss	chr1	gencode::ASPM::ENSG00000066279.12	ASPM	108	1	0.342469	2.91997	0.243966	1
log-likelihoods	ss	chr12	gencode::GPR133::ENSG00000111452.8	GPR133	100	1	0.315612	3.16845	0.244758	1
log-likelihoods	ss	chr22	gencode::MYO18B::ENSG00000133454.11	MYO18B	172	1	0.69605	1.43668	0.246739	1
log-likelihoods	ss	chr10	gencode::PARD3::ENSG00000148498.11	PARD3	102	1	0.305346	3.27498	0.247914	1
log-likelihoods	ss	chr5	gencode::CDHR2::ENSG00000074276.6	CDHR2	126	1	0.354913	2.81759	0.248968	1
log-likelihoods	ss	chr1	gencode::SPAG17::ENSG00000155761.9	SPAG17	190	1	0.486297	2.05636	0.250416	1
log-likelihoods	ss	chr11	gencode::SLC6A5::ENSG00000165970.7	SLC6A5	60	1	0.303552	3.29433	0.252978	1
log-likelihoods	ss	chr19	gencode::MYBPC2::ENSG00000086967.9	MYBPC2	108	1	0.384008	2.60411	0.253541	1
log-likelihoods	ss	chr2	gencode::BAZ2B::ENSG00000123636.13	BAZ2B	144	1	0.308013	3.24662	0.253937	1
log-likelihoods	ss	chr18	gencode::TRAPPC8::ENSG00000153339.9	TRAPPC8	112	1	0.297487	3.36149	0.253974	1
log-likelihoods	ss	chr1	gencode::TNR::ENSG00000116147.12	TNR	94	1	0.467507	2.13901	0.254191	1
log-likelihoods	ss	chr10	gencode::ANKRD26::ENSG00000107890.12	ANKRD26	138	1	0.375539	2.66284	0.254896	1
log-likelihoods	ss	chr6	gencode::FAM184A::ENSG00000111879.14	FAM184A	74	1	0.33785	2.95989	0.25513	1
log-likelihoods	ss	chr2	gencode::HEATR5B::ENSG00000008869.7	HEATR5B	140	1	0.300218	3.33091	0.256019	1
log-likelihoods	ss	chr8	gencode::ADAM2::ENSG00000104755.10	ADAM2	80	1	0.357159	2.79987	0.256957	1
log-likelihoods	ss	chr1	gencode::CHD5::ENSG00000116254.13	CHD5	164	1	0.470132	2.12706	0.257497	1
log-likelihoods	ss	chr18	gencode::RTTN::ENSG00000176225.8	RTTN	194	1	0.508755	1.96558	0.257856	1
log-likelihoods	ss	chr18	gencode::LAMA3::ENSG00000053747.11	LAMA3	298	1	0.598221	1.67162	0.258787	1
log-likelihoods	ss	chr12	gencode::STAB2::ENSG00000136011.10	STAB2	272	2	1.11125	1.79977	0.2596	1
log-likelihoods	ss	chr2	gencode::SPTBN1::ENSG00000115306.11	SPTBN1	140	1	0.315354	3.17104	0.259752	1
log-likelihoods	ss	chr4	gencode::WDR19::ENSG00000157796.13	WDR19	144	1	0.316628	3.15828	0.260963	1
log-likelihoods	ss	chr19	gencode::MUC16::ENSG00000181143.11	MUC16	332	2	1.02662	1.94815	0.262906	1
log-likelihoods	ss	chr8	gencode::BAI1::ENSG00000181790.6	BAI1	120	1	0.450368	2.22041	0.264436	1
log-likelihoods	ss	chr1	gencode::INADL::ENSG00000132849.14	INADL	172	1	0.395818	2.52641	0.268668	1
log-likelihoods	ss	chr2	gencode::UBR3::ENSG00000144357.12	UBR3	154	1	0.392379	2.54855	0.270009	1
log-likelihoods	ss	chr1	gencode::LYST::ENSG00000143669.9	LYST	214	1	0.538968	1.8554	0.270548	1
log-likelihoods	ss	chr2	gencode::KCNH7::ENSG00000184611.7	KCNH7	58	1	0.330636	3.02447	0.270819	1
log-likelihoods	ss	chr6	gencode::KIAA1244::ENSG00000112379.8	KIAA1244	132	1	0.356819	2.80254	0.272059	1
log-likelihoods	ss	chr15	gencode::SCAPER::ENSG00000140386.8	SCAPER	134	1	0.375673	2.66189	0.272461	1
log-likelihoods	ss	chr3	gencode::STXBP5L::ENSG00000145087.8	STXBP5L	110	1	0.458158	2.18265	0.279945	1
log-likelihoods	ss	chr1	gencode::HMCN1::ENSG00000143341.7	HMCN1	424	2	1.07039	1.86849	0.281808	1
log-likelihoods	ss	chr20	gencode::KIF16B::ENSG00000089177.13	KIF16B	102	1	0.336572	2.97113	0.285318	1
log-likelihoods	ss	chr12	gencode::PIK3C2G::ENSG00000139144.5	PIK3C2G	128	1	0.722274	1.38452	0.286369	1
log-likelihoods	ss	chr12	gencode::C2CD5::ENSG00000111731.8	C2CD5	116	1	0.370707	2.69755	0.288536	1
log-likelihoods	ss	chr15	gencode::HERC2::ENSG00000128731.11	HERC2	368	2	1.16028	1.72373	0.288541	1
log-likelihoods	ss	chr9	gencode::KCNT1::ENSG00000107147.7	KCNT1	130	1	0.47491	2.10566	0.289333	1
log-likelihoods	ss	chr4	gencode::CENPE::ENSG00000138778.7	CENPE	192	1	0.546322	1.83042	0.295234	1
log-likelihoods	ss	chr11	gencode::CNTN5::ENSG00000149972.6	CNTN5	94	1	0.575525	1.73754	0.29633	1
log-likelihoods	ss	chr4	gencode::GRIA2::ENSG00000120251.14	GRIA2	68	1	0.414339	2.41348	0.297346	1
log-likelihoods	ss	chr1	gencode::LRRC7::ENSG00000033122.14	LRRC7	110	1	0.46411	2.15466	0.299062	1
log-likelihoods	ss	chr13	gencode::PDS5B::ENSG00000083642.14	PDS5B	136	1	0.368972	2.71023	0.299439	1
log-likelihoods	ss	chr2	gencode::TRIP12::ENSG00000153827.9	TRIP12	166	1	0.370953	2.69576	0.300438	1
log-likelihoods	ss	chr21	gencode::ITSN1::ENSG00000205726.9	ITSN1	164	1	0.373073	2.68044	0.302503	1
log-likelihoods	ss	chr9	gencode::DOCK8::ENSG00000107099.11	DOCK8	188	1	0.443083	2.25691	0.303765	1
log-likelihoods	ss	chr12	gencode::MUC19::ENSG00000205592.9	MUC19	332	3	2.20493	1.36059	0.304372	1
log-likelihoods	ss	chr18	gencode::TCF4::ENSG00000196628.9	TCF4	104	1	0.387814	2.57856	0.304709	1
log-likelihoods	ss	chr10	gencode::DOCK1::ENSG00000150760.8	DOCK1	204	1	0.612823	1.63179	0.305257	1
log-likelihoods	ss	chr6	gencode::LAMA2::ENSG00000196569.7	LAMA2	256	1	0.843969	1.18488	0.306123	1
log-likelihoods	ss	chr1	gencode::MACF1::ENSG00000127603.19	MACF1	418	1	0.704652	1.41914	0.307003	1
log-likelihoods	ss	chr5	gencode::DMXL1::ENSG00000172869.10	DMXL1	172	1	0.427386	2.33981	0.309376	1
log-likelihoods	ss	chr16	gencode::VWA3A::ENSG00000175267.10	VWA3A	136	1	0.403726	2.47693	0.310982	1
log-likelihoods	ss	chr2	gencode::NRXN1::ENSG00000179915.16	NRXN1	116	1	0.659628	1.51601	0.312244	1
log-likelihoods	ss	chr12	gencode::ADAMTS20::ENSG00000173157.12	ADAMTS20	154	1	0.872159	1.14658	0.314922	1
log-likelihoods	ss	chr6	gencode::EYS::ENSG00000188107.9	EYS	172	1	0.829407	1.20568	0.316389	1
log-likelihoods	ss	chr6	gencode::ENPP1::ENSG00000197594.7	ENPP1	96	1	0.431668	2.31659	0.316914	1
log-likelihoods	ss	chr4	gencode::INPP4B::ENSG00000109452.8	INPP4B	114	1	0.398751	2.50783	0.318065	1
log-likelihoods	ss	chr2	gencode::UNC80::ENSG00000144406.14	UNC80	252	1	1.14704	0.871806	0.321461	1
log-likelihoods	ss	chr3	gencode::DNAH12::ENSG00000174844.10	DNAH12	232	1	0.759739	1.31624	0.322319	1
log-likelihoods	ss	chr13	gencode::FLT1::ENSG00000102755.6	FLT1	128	1	0.413743	2.41696	0.324467	1
log-likelihoods	ss	chr12	gencode::GUCY2C::ENSG00000070019.3	GUCY2C	104	1	0.459243	2.1775	0.32567	1
log-likelihoods	ss	chr3	gencode::ABI3BP::ENSG00000154175.12	ABI3BP	262	1	0.648004	1.5432	0.327419	1
log-likelihoods	ss	chr16	gencode::RBFOX1::ENSG00000078328.15	RBFOX1	78	1	0.441486	2.26508	0.327503	1
log-likelihoods	ss	chr15	gencode::TMC3::ENSG00000188869.8	TMC3	84	1	0.395575	2.52796	0.327577	1
log-likelihoods	ss	chr1	gencode::PAPPA2::ENSG00000116183.6	PAPPA2	86	1	0.427072	2.34153	0.32789	1
log-likelihoods	ss	chr9	gencode::COL27A1::ENSG00000196739.10	COL27A1	240	1	0.594838	1.68113	0.328082	1
log-likelihoods	ss	chr7	gencode::COL1A2::ENSG00000164692.13	COL1A2	204	1	0.4706	2.12495	0.329639	1
log-likelihoods	ss	chr5	gencode::PARP8::ENSG00000151883.12	PARP8	120	1	0.4825	2.07254	0.330645	1
log-likelihoods	ss	chr20	gencode::RALGAPA2::ENSG00000188559.9	RALGAPA2	156	1	0.584733	1.71018	0.335896	1
log-likelihoods	ss	chr12	gencode::ACACB::ENSG00000076555.11	ACACB	212	1	0.619698	1.61369	0.337238	1
log-likelihoods	ss	chr6	gencode::SHPRH::ENSG00000146414.11	SHPRH	120	1	0.433783	2.3053	0.338527	1
log-likelihoods	ss	chr1	gencode::TNNI3K::ENSG00000116783.10	TNNI3K	100	1	0.518547	1.92847	0.339365	1
log-likelihoods	ss	chr5	gencode::BDP1::ENSG00000145734.14	BDP1	152	1	0.417637	2.39443	0.339603	1
log-likelihoods	ss	chr1	gencode::MTR::ENSG00000116984.8	MTR	132	1	0.421857	2.37047	0.341311	1
log-likelihoods	ss	chr5	gencode::C5orf42::ENSG00000197603.9	C5orf42	204	1	0.468432	2.13478	0.344867	1
log-likelihoods	ss	chr11	gencode::SORL1::ENSG00000137642.8	SORL1	196	1	0.604348	1.65467	0.345111	1
log-likelihoods	ss	chr1	gencode::FPGT-TNNI3K::ENSG00000259030.2	FPGT-TNNI3K	102	1	0.533135	1.8757	0.346614	1
log-likelihoods	ss	chr10	gencode::KCNMA1::ENSG00000156113.16	KCNMA1	138	1	0.469249	2.13107	0.350715	1
log-likelihoods	ss	chr3	gencode::ATP13A5::ENSG00000187527.6	ATP13A5	116	1	0.574813	1.7397	0.350879	1
log-likelihoods	ss	chr1	gencode::DNAH14::ENSG00000185842.10	DNAH14	354	1	1.20434	0.830328	0.35297	1
log-likelihoods	ss	chr1	gencode::SPTA1::ENSG00000163554.7	SPTA1	204	2	1.26699	1.57855	0.356543	1
log-likelihoods	ss	chr2	gencode::CTNNA2::ENSG00000066032.14	CTNNA2	98	1	0.57957	1.72542	0.360609	1
log-likelihoods	ss	chr18	gencode::SMCHD1::ENSG00000101596.10	SMCHD1	190	1	0.457049	2.18795	0.362504	1
log-likelihoods	ss	chr3	gencode::COL7A1::ENSG00000114270.11	COL7A1	468	1	0.868189	1.15182	0.362668	1
log-likelihoods	ss	chr17	gencode::RNF213::ENSG00000173821.15	RNF213	268	1	0.517947	1.9307	0.373734	1
log-likelihoods	ss	chr6	gencode::DNAH8::ENSG00000124721.13	DNAH8	366	2	1.96064	1.02008	0.376997	1
log-likelihoods	ss	chr2	gencode::THSD7B::ENSG00000144229.7	THSD7B	114	1	0.540769	1.84922	0.386437	1
log-likelihoods	ss	chr17	gencode::DNAH17::ENSG00000187775.12	DNAH17	312	1	0.54819	1.82418	0.389283	1
log-likelihoods	ss	chr2	gencode::KIF1A::ENSG00000130294.10	KIF1A	196	1	0.568027	1.76048	0.389762	1
log-likelihoods	ss	chr7	gencode::DPP6::ENSG00000130226.12	DPP6	106	1	0.590401	1.69376	0.395753	1
log-likelihoods	ss	chr2	gencode::SCN7A::ENSG00000136546.9	SCN7A	96	1	0.510914	1.95728	0.395925	1
log-likelihoods	ss	chr18	gencode::ANKRD30B::ENSG00000180777.9	ANKRD30B	140	1	0.808516	1.23683	0.406533	1
log-likelihoods	ss	chr12	gencode::OTOGL::ENSG00000165899.6	OTOGL	228	1	0.913549	1.09463	0.411311	1
log-likelihoods	ss	chr10	gencode::ANK3::ENSG00000151150.16	ANK3	188	1	0.604146	1.65523	0.416072	1
log-likelihoods	ss	chr5	gencode::DNAH5::ENSG00000039139.9	DNAH5	312	1	1.24428	0.803676	0.41611	1
log-likelihoods	ss	chr17	gencode::DNAH2::ENSG00000183914.10	DNAH2	348	1	0.780368	1.28145	0.42583	1
log-likelihoods	ss	chr6	gencode::LPA::ENSG00000198670.7	LPA	156	1	0.702679	1.42313	0.42683	1
log-likelihoods	ss	chr11	gencode::DCDC1::ENSG00000170959.10	DCDC1	154	1	0.89207	1.12099	0.427841	1
log-likelihoods	ss	chr3	gencode::MORC1::ENSG00000114487.5	MORC1	108	1	0.665959	1.50159	0.433238	1
log-likelihoods	ss	chr15	gencode::UNC13C::ENSG00000137766.12	UNC13C	134	1	0.844675	1.18389	0.439437	1
log-likelihoods	ss	chr12	gencode::NAV3::ENSG00000067798.9	NAV3	162	1	0.753115	1.32782	0.441869	1
log-likelihoods	ss	chr15	gencode::AGBL1::ENSG00000166748.8	AGBL1	92	1	0.587244	1.70287	0.445211	1
log-likelihoods	ss	chr1	gencode::CR1::ENSG00000203710.6	CR1	184	1	0.62405	1.60243	0.465319	1
log-likelihoods	ss	chr6	gencode::DST::ENSG00000151914.13	DST	420	1	0.966475	1.03469	0.472886	1
log-likelihoods	ss	chr2	gencode::DNAH6::ENSG00000115423.14	DNAH6	302	1	0.918153	1.08914	0.479614	1
log-likelihoods	ss	chr5	gencode::FBN2::ENSG00000138829.6	FBN2	278	1	1.08133	0.924787	0.47963	1
log-likelihoods	ss	chr9	gencode::PTPRD::ENSG00000153707.11	PTPRD	206	1	0.95551	1.04656	0.479945	1
log-likelihoods	ss	chr1	gencode::RYR2::ENSG00000198626.11	RYR2	434	2	2.10129	0.951795	0.480741	1
log-likelihoods	ss	chr2	gencode::LRP1B::ENSG00000168702.12	LRP1B	360	2	1.9542	1.02344	0.48125	1
log-likelihoods	ss	chr14	gencode::SYNE2::ENSG00000054654.11	SYNE2	492	1	1.11637	0.895757	0.483579	1
log-likelihoods	ss	chr2	gencode::NBAS::ENSG00000151779.8	NBAS	204	1	0.684073	1.46183	0.484212	1
log-likelihoods	ss	chr7	gencode::SDK1::ENSG00000146555.14	SDK1	176	1	0.743537	1.34492	0.49068	1
log-likelihoods	ss	chr2	gencode::TTN::ENSG00000155657.19	TTN	1450	5	4.94534	1.01105	0.493982	1
log-likelihoods	ss	chr8	gencode::RIMS2::ENSG00000176406.16	RIMS2	130	1	0.712637	1.40324	0.495684	1
log-likelihoods	ss	chr8	gencode::PRKDC::ENSG00000253729.3	PRKDC	342	1	0.76704	1.30371	0.527451	1
log-likelihoods	ss	chr17	gencode::MYH1::ENSG00000109061.9	MYH1	156	1	0.857837	1.16572	0.551174	1
log-likelihoods	ss	chr1	gencode::OBSCN::ENSG00000154358.15	OBSCN	463	1	1.03379	0.967314	0.587335	1
log-likelihoods	ss	chr6	gencode::COL19A1::ENSG00000082293.8	COL19A1	202	1	1.08323	0.923164	0.605084	1
log-likelihoods	ss	chr2	gencode::LRP2::ENSG00000081479.8	LRP2	310	1	1.16945	0.855105	0.605099	1
log-likelihoods	ss	chr11	gencode::DYNC2H1::ENSG00000187240.9	DYNC2H1	356	1	1.13133	0.883919	0.632598	1
log-likelihoods	ss	chr7	gencode::RELN::ENSG00000189056.9	RELN	260	1	1.15272	0.867512	0.649156	1
log-likelihoods	ss	chr6	gencode::SYNE1::ENSG00000131018.18	SYNE1	596	1	1.62294	0.616166	0.786511	1
log-likelihoods	ss	chr10	gencode::A1CF::ENSG00000148584.10	A1CF	56	0	0.22688	0	1	1
log-likelihoods	ss	chr10	gencode::ABCC2::ENSG00000023839.6	ABCC2	122	0	0.286018	0	1	1
log-likelihoods	ss	chr10	gencode::ABI1::ENSG00000136754.12	ABI1	52	0	0.102951	0	1	1
log-likelihoods	ss	chr10	gencode::ABLIM1::ENSG00000099204.14	ABLIM1	100	0	0.178084	0	1	1
log-likelihoods	ss	chr10	gencode::ACADSB::ENSG00000196177.8	ACADSB	40	0	0.117618	0	1	1
log-likelihoods	ss	chr10	gencode::ACBD5::ENSG00000107897.14	ACBD5	52	0	0.152628	0	1	1
log-likelihoods	ss	chr10	gencode::ACBD7::ENSG00000176244.6	ACBD7	12	0	0.0372485	0	1	1
log-likelihoods	ss	chr10	gencode::ACTA2::ENSG00000107796.8	ACTA2	34	0	0.0559583	0	1	1
log-likelihoods	ss	chr10	gencode::ACTR1A::ENSG00000138107.7	ACTR1A	40	0	0.0784086	0	1	1
log-likelihoods	ss	chr10	gencode::ADAM12::ENSG00000148848.10	ADAM12	90	0	0.243734	0	1	1
log-likelihoods	ss	chr10	gencode::ADAM8::ENSG00000151651.11	ADAM8	88	0	0.236498	0	1	1
log-likelihoods	ss	chr10	gencode::ADAMTS14::ENSG00000138316.6	ADAMTS14	84	0	0.275108	0	1	1
log-likelihoods	ss	chr10	gencode::ADARB2::ENSG00000185736.11	ADARB2	34	0	0.14019	0	1	1
log-likelihoods	ss	chr10	gencode::ADD3::ENSG00000148700.9	ADD3	58	0	0.132948	0	1	1
log-likelihoods	ss	chr10	gencode::ADIRF::ENSG00000148671.9	ADIRF	8	0	0.010639	0	1	1
log-likelihoods	ss	chr10	gencode::ADK::ENSG00000156110.9	ADK	42	0	0.0999879	0	1	1
log-likelihoods	ss	chr10	gencode::AFAP1L2::ENSG00000169129.10	AFAP1L2	76	0	0.202152	0	1	1
log-likelihoods	ss	chr10	gencode::AGAP10::ENSG00000204172.7	AGAP10	44	0	0.0763742	0	1	1
log-likelihoods	ss	chr10	gencode::AGAP4::ENSG00000188234.9	AGAP4	24	0	0.0660869	0	1	1
log-likelihoods	ss	chr10	gencode::AGAP5::ENSG00000172650.8	AGAP5	28	0	0.0624312	0	1	1
log-likelihoods	ss	chr10	gencode::AGAP6::ENSG00000204149.5	AGAP6	28	0	0.0822546	0	1	1
log-likelihoods	ss	chr10	gencode::AGAP7::ENSG00000204169.6	AGAP7	24	0	0.0817207	0	1	1
log-likelihoods	ss	chr10	gencode::AGAP8::ENSG00000174194.11	AGAP8	30	0	0.068883	0	1	1
log-likelihoods	ss	chr10	gencode::AGAP9::ENSG00000198035.9	AGAP9	42	0	0.064837	0	1	1
log-likelihoods	ss	chr10	gencode::AIFM2::ENSG00000042286.10	AIFM2	36	0	0.0557873	0	1	1
log-likelihoods	ss	chr10	gencode::AKR1C1::ENSG00000187134.8	AKR1C1	56	0	0.191229	0	1	1
log-likelihoods	ss	chr10	gencode::AKR1C2::ENSG00000151632.12	AKR1C2	42	0	0.123836	0	1	1
log-likelihoods	ss	chr10	gencode::AKR1C3::ENSG00000196139.7	AKR1C3	34	0	0.091518	0	1	1
log-likelihoods	ss	chr10	gencode::AKR1CL1::ENSG00000196326.6	AKR1CL1	14	0	0.0692886	0	1	1
log-likelihoods	ss	chr10	gencode::AKR1E2::ENSG00000165568.13	AKR1E2	34	0	0.109731	0	1	1
log-likelihoods	ss	chr10	gencode::AL133481.1::ENSG00000235705.4	AL133481.1	8	0	0.0218994	0	1	1
log-likelihoods	ss	chr10	gencode::AL137026.1::ENSG00000269515.1	AL137026.1	4	0	0.0187809	0	1	1
log-likelihoods	ss	chr10	gencode::AL161645.2::ENSG00000268925.1	AL161645.2	2	0	0.00550458	0	1	1
log-likelihoods	ss	chr10	gencode::AL355490.1::ENSG00000224474.2	AL355490.1	12	0	0.0484712	0	1	1
log-likelihoods	ss	chr10	gencode::AL359878.1::ENSG00000205740.1	AL359878.1	4	0	0.01636	0	1	1
log-likelihoods	ss	chr10	gencode::AL360181.1::ENSG00000268882.1	AL360181.1	4	0	0.00842693	0	1	1
log-likelihoods	ss	chr10	gencode::AL391421.1::ENSG00000204049.1	AL391421.1	4	0	0.00658592	0	1	1
log-likelihoods	ss	chr10	gencode::AL450307.1::ENSG00000189275.3	AL450307.1	16	0	0.0601619	0	1	1
log-likelihoods	ss	chr10	gencode::AL591684.1::ENSG00000215020.3	AL591684.1	4	0	0.0104002	0	1	1
log-likelihoods	ss	chr10	gencode::AL603965.1::ENSG00000215033.3	AL603965.1	4	0	0.00559608	0	1	1
log-likelihoods	ss	chr10	gencode::ALDH18A1::ENSG00000059573.4	ALDH18A1	68	0	0.174722	0	1	1
log-likelihoods	ss	chr10	gencode::ALOX5::ENSG00000012779.6	ALOX5	52	0	0.200993	0	1	1
log-likelihoods	ss	chr10	gencode::ANAPC16::ENSG00000166295.4	ANAPC16	12	0	0.0192196	0	1	1
log-likelihoods	ss	chr10	gencode::ANKRD1::ENSG00000148677.6	ANKRD1	32	0	0.0887645	0	1	1
log-likelihoods	ss	chr10	gencode::ANKRD2::ENSG00000165887.7	ANKRD2	32	0	0.0838923	0	1	1
log-likelihoods	ss	chr10	gencode::ANTXRL::ENSG00000198250.8	ANTXRL	64	0	0.226684	0	1	1
log-likelihoods	ss	chr10	gencode::ANXA11::ENSG00000122359.13	ANXA11	78	0	0.20977	0	1	1
[truncated: 16,110 more rows]

## Sheet: LogLik_3utr
scheme	type	chromosome	id	gname	size	n_mut_observed	n_mut_expected	observed_expected_ratio	p_value	p_value_BH
[truncated: 18,481 more rows]

[truncated: 2 more sheets: LogLik_5utr, LogLik_cds]
