# Supplementary material for: Non-coding cancer driver candidates identified with a sample- and position-specific model of the somatic mutation rate
Source: eLife journal article supplement (doi:10.7554/elife.21778), 2017-03-31
Supplement: supp [file elife-21778-supp-v2.zip › elife_poa_e21778_Supplementary_File_4.xlsx]

## Sheet: legend
General description
Definitions of each of the analysed candidate elements in bed12 format
Sheet number	Sheet name	Information
2	gc19_pc.prom.gene.bed	Promoter elements
3	gc19_pc.ss.gene.bed	Splice sites
4	gc19_pc.3utr.gene.bed	3' UTRs
5	gc19_pc.5utr.gene.bed	5' UTRs
6	gc19_pc.cds.gene.bed	Protein-coding genes

## Sheet: gc19_pc.prom.gene.bed
chr1	68590	69090	gencode::OR4F5::ENSG00000186092.4	0	+	68590	69090	0	1	500,	0,
chr1	139379	139879	gencode::AL627309.1::ENSG00000237683.5	0	-	139379	139879	0	1	500,	0,
chr1	367139	367639	gencode::OR4F29::ENSG00000235249.1	0	+	367139	367639	0	1	500,	0,
chr1	622053	622553	gencode::OR4F16::ENSG00000185097.2	0	-	622053	622553	0	1	500,	0,
chr1	738637	739637	gencode::AL669831.1::ENSG00000269831.1	0	-	738637	739637	0	3	148,304,500,	0,177,500,
chr1	817542	818542	gencode::AL645608.2::ENSG00000269308.1	0	+	817542	818542	0	2	500,482,	0,518,
chr1	860617	861617	gencode::SAMD11::ENSG00000187634.6	0	+	860617	861617	0	3	500,81,209,	0,565,791,
chr1	865945	866945	gencode::AL645608.1::ENSG00000268179.1	0	-	865945	866945	0	3	42,418,474,	0,53,526,
chr1	894170	895170	gencode::NOC2L::ENSG00000188976.6	0	-	894170	895170	0	3	136,129,500,	0,293,500,
chr1	895466	896466	gencode::KLHL17::ENSG00000187961.9	0	+	895466	896466	0	2	500,284,	0,716,
chr1	901376	902381	gencode::PLEKHN1::ENSG00000187583.6	0	+	901376	902381	0	3	500,85,196,	0,620,809,
chr1	916973	917997	gencode::C1orf170::ENSG00000187642.5	0	-	916973	917997	0	2	469,500,	0,524,
chr1	934861	936052	gencode::HES4::ENSG00000188290.6	0	-	934861	936052	0	3	42,74,500,	0,134,691,
chr1	948302	949302	gencode::ISG15::ENSG00000187608.5	0	+	948302	949302	0	2	500,344,	0,656,
chr1	955002	956002	gencode::AGRN::ENSG00000188157.9	0	+	955002	956002	0	2	500,247,	0,753,
chr1	1009187	1010187	gencode::RNF223::ENSG00000237330.2	0	-	1009187	1010187	0	2	206,500,	0,500,
chr1	1027554	1052236	gencode::C1orf159::ENSG00000131591.13	0	-	1027554	1052236	0	5	500,326,500,476,500,	0,13453,13953,23407,24182,
chr1	1108782	1115411	gencode::TTLL10::ENSG00000162571.9	0	+	1108782	1115411	0	5	500,335,82,319,176,	0,526,921,5933,6453,
chr1	1140560	1142571	gencode::TNFRSF18::ENSG00000186891.9	0	-	1140560	1142571	0	3	187,702,500,	0,500,1511,
chr1	1149012	1150012	gencode::TNFRSF4::ENSG00000186827.6	0	-	1149012	1150012	0	3	28,193,500,	0,155,500,
chr1	1166870	1167628	gencode::SDF4::ENSG00000078808.12	0	-	1166870	1167628	0	2	399,217,	0,541,
chr1	1167128	1167628	gencode::B3GALT6::ENSG00000176022.3	0	+	1167128	1167628	0	2	141,217,	0,283,
chr1	1181602	1182602	gencode::FAM132A::ENSG00000184163.3	0	-	1181602	1182602	0	2	289,500,	0,500,
chr1	1201003	1209765	gencode::UBE2J2::ENSG00000160087.16	0	-	1201003	1209765	0	4	472,500,270,500,	0,500,7603,8262,
chr1	1215315	1218075	gencode::SCNN1D::ENSG00000162572.15	0	+	1215315	1218075	0	3	500,496,378,	0,1677,2382,
chr1	1242769	1243898	gencode::ACAP3::ENSG00000131584.14	0	-	1242769	1243898	0	2	377,500,	0,629,
chr1	1243446	1244446	gencode::PUSL1::ENSG00000169972.7	0	+	1243446	1244446	0	3	500,190,92,	0,656,908,
chr1	1259489	1260571	gencode::CPSF3L::ENSG00000127054.14	0	-	1259489	1260571	0	3	469,75,87,	0,582,995,
chr1	1259646	1260646	gencode::GLTPD1::ENSG00000224051.2	0	+	1259646	1260646	0	3	312,75,162,	0,425,838,
chr1	1266193	1267015	gencode::TAS1R3::ENSG00000169962.4	0	+	1266193	1267015	0	2	500,97,	0,725,
chr1	1283992	1285230	gencode::DVL1::ENSG00000107404.13	0	-	1283992	1285230	0	2	281,500,	0,738,
chr1	1293415	1297657	gencode::MXRA8::ENSG00000162576.12	0	-	1293415	1297657	0	3	418,500,500,	0,508,3742,
chr1	1310037	1311375	gencode::AURKAIP1::ENSG00000175756.9	0	-	1310037	1311375	0	2	45,500,	0,838,
chr1	1333184	1335197	gencode::CCNL2::ENSG00000221978.7	0	-	1333184	1335197	0	6	426,250,131,204,204,126,	0,540,869,1008,1513,1887,
chr1	1334697	1335431	gencode::RP4-758J18.2::ENSG00000224870.3	0	+	1334697	1335431	0	2	204,360,	0,374,
chr1	1342170	1343193	gencode::MRPL20::ENSG00000242485.1	0	-	1342170	1343193	0	3	116,107,500,	0,231,523,
chr1	1356140	1357649	gencode::ANKRD65::ENSG00000235098.4	0	-	1356140	1357649	0	2	34,500,	0,1009,
chr1	1361007	1362007	gencode::TMEM88B::ENSG00000205116.3	0	+	1361007	1362007	0	2	500,240,	0,760,
chr1	1370402	1371550	gencode::VWA1::ENSG00000179403.10	0	+	1370402	1371550	0	2	500,347,	0,801,
chr1	1384568	1385068	gencode::ATAD3C::ENSG00000215915.5	0	+	1384568	1385068	0	1	500,	0,
chr1	1406642	1407648	gencode::ATAD3B::ENSG00000160072.15	0	+	1406642	1407648	0	2	500,177,	0,829,
chr1	1447030	1448409	gencode::ATAD3A::ENSG00000197785.9	0	+	1447030	1448409	0	3	500,54,337,	0,825,1042,
chr1	1475237	1476333	gencode::TMEM240::ENSG00000205090.4	0	-	1475237	1476333	0	3	430,60,500,	0,500,596,
chr1	1509464	1510354	gencode::SSU72::ENSG00000160075.10	0	-	1509464	1510354	0	2	391,105,	0,785,
chr1	1509854	1510354	gencode::AL645728.1::ENSG00000215014.3	0	+	1509854	1510354	0	2	1,105,	0,395,
chr1	1535476	1535976	gencode::C1orf233::ENSG00000228594.1	0	-	1535476	1535976	0	1	500,	0,
chr1	1550294	1553439	gencode::MIB2::ENSG00000197530.8	0	+	1550294	1553439	0	6	500,269,207,193,500,342,	0,721,1188,1702,2145,2803,
chr1	1566973	1568057	gencode::MMP23B::ENSG00000189409.8	0	+	1566973	1568057	0	2	500,302,	0,782,
chr1	1588214	1589435	gencode::CDK11B::ENSG00000248333.3	0	-	1588214	1589435	0	3	489,108,500,	0,500,721,
chr1	1623583	1624667	gencode::SLC35E2B::ENSG00000189339.7	0	-	1623583	1624667	0	2	302,500,	0,584,
chr1	1653770	1656266	gencode::CDK11A::ENSG00000008128.18	0	-	1653770	1656266	0	4	254,498,431,500,	0,502,1493,1996,
chr1	1676858	1677931	gencode::SLC35E2::ENSG00000215790.2	0	-	1676858	1677931	0	2	302,500,	0,573,
chr1	1689581	1712008	gencode::NADK::ENSG00000008130.11	0	-	1689581	1712008	0	7	220,456,316,273,500,333,500,	0,500,19828,20328,20648,21427,21927,
chr1	1821995	1822995	gencode::GNB1::ENSG00000078369.13	0	-	1821995	1822995	0	2	261,500,	0,500,
chr1	1845765	1846765	gencode::CALML6::ENSG00000169885.5	0	+	1845765	1846765	0	2	500,17,	0,983,
chr1	1850236	1851212	gencode::TMEM52::ENSG00000178821.8	0	-	1850236	1851212	0	4	93,106,89,500,	0,139,293,476,
chr1	1934653	1935653	gencode::C1orf222::ENSG00000142609.13	0	-	1934653	1935653	0	2	484,500,	0,500,
chr1	1950279	1951279	gencode::GABRD::ENSG00000187730.6	0	+	1950279	1951279	0	2	500,347,	0,653,
chr1	2004400	2036654	gencode::PRKCZ::ENSG00000067606.11	0	+	2004400	2036654	0	4	500,30,500,318,	0,970,31254,31936,
chr1	2120736	2121236	gencode::AL590822.2::ENSG00000269554.1	0	+	2120736	2121236	0	2	250,14,	0,486,
chr1	2125680	2130927	gencode::C1orf86::ENSG00000162585.12	0	-	2125680	2130927	0	4	444,500,263,500,	0,533,4247,4747,
chr1	2145620	2146120	gencode::AL590822.1::ENSG00000203301.2	0	-	2145620	2146120	0	1	500,	0,
chr1	2159633	2160133	gencode::SKI::ENSG00000157933.9	0	+	2159633	2160133	0	1	500,	0,
chr1	2258080	2259080	gencode::AL589739.1::ENSG00000269753.1	0	+	2258080	2259080	0	2	500,38,	0,962,
chr1	2322646	2323646	gencode::MORN1::ENSG00000116151.9	0	-	2322646	2323646	0	3	248,120,247,	0,500,753,
chr1	2322766	2325443	gencode::RER1::ENSG00000157916.14	0	+	2322766	2325443	0	4	128,120,429,500,	0,380,633,2177,
chr1	2343469	2344510	gencode::PEX10::ENSG00000157911.5	0	-	2343469	2344510	0	2	358,500,	0,541,
chr1	2398397	2408253	gencode::PLCH2::ENSG00000149527.13	0	+	2398397	2408253	0	4	500,294,500,100,	0,706,8856,9756,
chr1	2457535	2458539	gencode::PANK4::ENSG00000157881.9	0	-	2457535	2458539	0	2	365,500,	0,504,
chr1	2461190	2462184	gencode::HES5::ENSG00000197921.5	0	-	2461190	2462184	0	3	92,95,500,	0,262,494,
chr1	2487160	2488304	gencode::TNFRSF14::ENSG00000157873.13	0	+	2487160	2488304	0	3	500,102,130,	0,542,1014,
chr1	2517713	2518757	gencode::FAM213B::ENSG00000157870.10	0	+	2517713	2518757	0	3	500,138,21,	0,676,1023,
chr1	2560433	2564981	gencode::MMEL1::ENSG00000142606.11	0	-	2560433	2564981	0	4	334,471,373,500,	0,529,3496,4048,
chr1	2705736	2718786	gencode::TTC34::ENSG00000215912.7	0	-	2705736	2718786	0	4	329,500,353,500,	0,500,12050,12550,
chr1	2937545	2938045	gencode::ACTRT2::ENSG00000169717.5	0	+	2937545	2938045	0	1	500,	0,
chr1	2985231	2986274	gencode::PRDM16::ENSG00000142611.12	0	+	2985231	2986274	0	2	500,412,	0,631,
chr1	3370489	3388687	gencode::ARHGEF16::ENSG00000130762.10	0	+	3370489	3388687	0	7	500,112,500,775,131,500,330,	0,888,11579,12270,13414,17198,17868,
chr1	3447512	3528559	gencode::MEGF6::ENSG00000162591.11	0	-	3447512	3528559	0	4	129,500,140,500,	0,500,80047,80547,
chr1	3541065	3542113	gencode::TPRG1L::ENSG00000158109.10	0	+	3541065	3542113	0	3	500,146,32,	0,774,1016,
chr1	3566122	3567137	gencode::WRAP73::ENSG00000116213.11	0	-	3566122	3567137	0	2	370,500,	0,515,
chr1	3568583	3615121	gencode::TP73::ENSG00000078900.10	0	+	3568583	3615121	0	8	500,421,465,433,500,225,500,404,	0,624,29846,30413,38152,38927,45538,46134,
chr1	3668461	3669461	gencode::CCDC27::ENSG00000162592.4	0	+	3668461	3669461	0	2	500,96,	0,904,
chr1	3688851	3690126	gencode::SMIM1::ENSG00000235169.3	0	+	3688851	3690126	0	3	500,217,379,	0,556,896,
chr1	3713068	3713568	gencode::LRRC47::ENSG00000130764.5	0	-	3713068	3713568	0	1	500,	0,
chr1	3773263	3773844	gencode::CEP104::ENSG00000116198.8	0	-	3773263	3773844	0	2	187,66,	0,515,
chr1	3773344	3774344	gencode::DFFB::ENSG00000169598.11	0	+	3773344	3774344	0	3	106,66,61,	0,434,939,
chr1	3816349	3817349	gencode::C1orf174::ENSG00000198912.6	0	-	3816349	3817349	0	2	384,500,	0,500,
chr1	4714291	4715604	gencode::AJAP1::ENSG00000196581.6	0	+	4714291	4715604	0	2	500,88,	0,1225,
chr1	6051025	6106673	gencode::KCNAB2::ENSG00000069424.10	0	+	6051025	6106673	0	8	500,683,410,500,372,500,500,428,	0,593,1825,34854,35482,42817,54455,55220,
chr1	6052031	6053031	gencode::NPHP4::ENSG00000131697.13	0	-	6052031	6053031	0	2	270,181,	0,819,
chr1	6100899	6101888	gencode::AL035406.1::ENSG00000268332.1	0	-	6100899	6101888	0	2	487,489,	0,500,
chr1	6239683	6240683	gencode::CHD5::ENSG00000116254.13	0	-	6239683	6240683	0	2	319,500,	0,500,
chr1	6257317	6261402	gencode::RPL22::ENSG00000116251.5	0	-	6257317	6261402	0	6	392,499,447,500,144,500,	0,501,1855,2355,3085,3585,
chr1	6265688	6266593	gencode::RNF207::ENSG00000158286.8	0	+	6265688	6266593	0	2	500,229,	0,676,
chr1	6295500	6296500	gencode::ICMT::ENSG00000116237.11	0	-	6295500	6296500	0	2	274,500,	0,500,
chr1	6303751	6304751	gencode::HES3::ENSG00000173673.7	0	+	6303751	6304751	0	4	500,105,97,60,	0,552,757,940,
chr1	6320535	6321535	gencode::GPR153::ENSG00000158292.6	0	-	6320535	6321535	0	2	347,500,	0,500,
chr1	6419404	6454951	gencode::ACOT7::ENSG00000097021.15	0	-	6419404	6454951	0	7	500,361,500,178,500,393,500,	0,862,1363,25969,26469,33517,35047,
chr1	6479463	6484847	gencode::HES2::ENSG00000069812.7	0	-	6479463	6484847	0	5	201,69,500,305,117,	0,301,516,4767,5267,
chr1	6484347	6509344	gencode::ESPN::ENSG00000187017.10	0	+	6484347	6509344	0	6	188,117,36,500,519,191,	0,383,964,23255,23832,24806,
chr1	6525667	6526126	gencode::TNFRSF25::ENSG00000215788.5	0	-	6525667	6526126	0	1	459,	0,
chr1	6545029	6580621	gencode::PLEKHG5::ENSG00000171680.16	0	-	6545029	6580621	0	12	352,364,500,372,500,434,500,294,260,221,500,500,	0,500,985,5101,5611,6231,6731,11227,11727,12127,12455,35092,
chr1	6614095	6615095	gencode::NOL9::ENSG00000162408.10	0	-	6614095	6615095	0	2	69,500,	0,500,
chr1	6614740	6615868	gencode::TAS1R1::ENSG00000173662.15	0	+	6614740	6615868	0	2	500,242,	0,886,
chr1	6639817	6640598	gencode::ZBTB48::ENSG00000204859.7	0	+	6639817	6640598	0	2	290,400,	0,381,
chr1	6663061	6675167	gencode::KLHL21::ENSG00000162413.12	0	-	6663061	6675167	0	3	500,340,500,	0,11106,11606,
chr1	6673244	6674244	gencode::PHF13::ENSG00000116273.5	0	+	6673244	6674244	0	2	500,77,	0,923,
chr1	6684425	6685751	gencode::THAP3::ENSG00000041988.11	0	+	6684425	6685751	0	3	500,191,397,	0,591,929,
chr1	6740597	6762484	gencode::DNAJC11::ENSG00000007923.11	0	-	6740597	6762484	0	5	368,191,500,423,500,	0,502,759,20766,21387,
chr1	6844883	7805520	gencode::CAMTA1::ENSG00000171735.14	0	+	6844883	7805520	0	4	500,453,372,436,	0,754,959637,960201,
chr1	7830828	7833266	gencode::VAMP3::ENSG00000049245.8	0	+	7830828	7833266	0	4	500,381,500,6,	0,619,1438,2432,
chr1	7843879	7845262	gencode::PER3::ENSG00000049246.10	0	+	7843879	7845262	0	3	500,273,195,	0,559,1188,
chr1	7912595	7914072	gencode::UTS2::ENSG00000049247.9	0	-	7912595	7914072	0	3	363,184,500,	0,585,977,
chr1	8000426	8001426	gencode::TNFRSF9::ENSG00000049249.4	0	-	8000426	8001426	0	2	415,500,	0,500,
chr1	8021222	8022528	gencode::PARK7::ENSG00000116288.8	0	+	8021222	8022528	0	3	500,98,365,	0,633,941,
chr1	8075446	8086868	gencode::ERRFI1::ENSG00000116285.8	0	-	8075446	8086868	0	4	106,439,372,500,	0,308,10397,10922,
chr1	8377385	8384889	gencode::SLC45A1::ENSG00000162426.10	0	+	8377385	8384889	0	4	500,420,474,101,	0,863,6504,7403,
chr1	8483226	8878202	gencode::RERE::ENSG00000142599.13	0	-	8483226	8878202	0	8	392,500,317,500,99,428,192,500,	0,500,102272,102772,232704,233276,393798,394476,
chr1	8938249	8939249	gencode::ENO1::ENSG00000074800.9	0	-	8938249	8939249	0	2	387,500,	0,500,
chr1	9005440	9006445	gencode::CA6::ENSG00000131686.10	0	+	9005440	9006445	0	2	500,419,	0,586,
chr1	9085904	9086904	gencode::SLC2A7::ENSG00000197241.3	0	-	9085904	9086904	0	2	447,500,	0,500,
chr1	9108819	9130275	gencode::SLC2A5::ENSG00000142583.13	0	-	9108819	9130275	0	4	337,500,456,500,	0,500,20285,20956,
chr1	9188683	9189729	gencode::GPR157::ENSG00000180758.10	0	-	9188683	9189729	0	2	18,500,	0,546,
chr1	9294333	9300402	gencode::H6PD::ENSG00000049239.8	0	+	9294333	9300402	0	4	500,206,500,323,	0,794,5069,5746,
chr1	9352438	9415765	gencode::SPSB1::ENSG00000171621.9	0	+	9352438	9415765	0	5	500,306,500,318,500,	0,694,58551,59233,62827,
chr1	9599040	9600040	gencode::SLC25A33::ENSG00000171612.6	0	+	9599040	9600040	0	2	500,232,	0,768,
chr1	9648431	9649479	gencode::TMEM201::ENSG00000188807.8	0	+	9648431	9649479	0	2	500,376,	0,672,
chr1	9711289	9778626	gencode::PIK3CD::ENSG00000171608.11	0	+	9711289	9778626	0	7	500,440,500,139,99,440,408,	0,573,58466,59051,59367,66397,66929,
chr1	9714144	9715144	gencode::C1orf200::ENSG00000179840.5	0	-	9714144	9715144	0	2	109,500,	0,500,
chr1	9883542	9885084	gencode::CLSTN1::ENSG00000171603.12	0	-	9883542	9885084	0	2	156,500,	0,1042,
chr1	9931650	9970894	gencode::CTNNBIP1::ENSG00000178585.10	0	-	9931650	9970894	0	9	374,500,226,146,500,269,500,329,500,	0,500,6084,6399,6584,21145,21645,38171,38744,
chr1	10002326	10003965	gencode::LZIC::ENSG00000162441.7	0	-	10002326	10003965	0	5	353,462,17,20,390,	0,516,1061,1139,1249,
chr1	10002985	10003985	gencode::NMNAT1::ENSG00000173614.9	0	+	10002985	10003985	0	4	319,17,20,410,	0,402,480,590,
chr1	10056773	10057773	gencode::RBP7::ENSG00000162444.11	0	+	10056773	10057773	0	2	500,382,	0,618,
chr1	10092389	10094153	gencode::UBE4B::ENSG00000130939.14	0	+	10092389	10094153	0	2	500,399,	0,1365,
chr1	10270362	10292807	gencode::KIF1B::ENSG00000054523.12	0	+	10270362	10292807	0	7	500,735,375,500,264,498,313,	0,576,1436,19959,20695,21445,22132,
chr1	10458625	10459674	gencode::PGD::ENSG00000142657.16	0	+	10458625	10459674	0	2	500,285,	0,764,
chr1	10489658	10490940	gencode::APITD1-CORT::ENSG00000251503.3	0	+	10489658	10490940	0	2	500,313,	0,969,
chr1	10489658	10490999	gencode::APITD1::ENSG00000175279.17	0	+	10489658	10490999	0	2	500,372,	0,969,
chr1	10509275	10510470	gencode::CORT::ENSG00000241563.2	0	+	10509275	10510470	0	2	500,89,	0,1106,
chr1	10532045	10533083	gencode::DFFA::ENSG00000160049.7	0	-	10532045	10533083	0	2	332,500,	0,538,
chr1	10534443	10535507	gencode::PEX14::ENSG00000142655.8	0	+	10534443	10535507	0	2	500,446,	0,618,
chr1	10856205	10857207	gencode::CASZ1::ENSG00000130940.10	0	-	10856205	10857207	0	2	413,500,	0,502,
chr1	11041594	11042594	gencode::C1orf127::ENSG00000175262.10	0	-	11041594	11042594	0	2	472,500,	0,500,
chr1	11072198	11074272	gencode::TARDBP::ENSG00000120948.11	0	+	11072198	11074272	0	4	500,438,498,248,	0,604,1074,1826,
chr1	11106792	11107790	gencode::MASP2::ENSG00000009724.12	0	-	11106792	11107790	0	3	153,79,500,	0,386,498,
chr1	11119581	11120581	gencode::SRM::ENSG00000116649.5	0	-	11119581	11120581	0	2	250,500,	0,500,
chr1	11159394	11160438	gencode::EXOSC10::ENSG00000171824.9	0	-	11159394	11160438	0	2	381,500,	0,544,
chr1	11191615	11323064	gencode::MTOR::ENSG00000198793.8	0	-	11191615	11323064	0	3	500,435,500,	0,130449,130949,
chr1	11248897	11249397	gencode::ANGPTL7::ENSG00000171819.4	0	+	11248897	11249397	0	1	500,	0,
chr1	11332762	11333262	gencode::UBIAD1::ENSG00000120942.9	0	+	11332762	11333262	0	1	500,	0,
chr1	11538794	11594232	gencode::PTCHD2::ENSG00000204624.6	0	+	11538794	11594232	0	4	500,363,500,346,	0,637,54438,55092,
chr1	11713931	11715382	gencode::FBXO44::ENSG00000132879.9	0	+	11713931	11715382	0	3	442,174,371,	0,808,1080,
chr1	11714239	11715239	gencode::FBXO2::ENSG00000116661.9	0	-	11714239	11715239	0	3	134,174,228,	0,500,772,
chr1	11723680	11724680	gencode::FBXO6::ENSG00000116663.6	0	+	11723680	11724680	0	2	500,366,	0,634,
chr1	11740675	11752207	gencode::MAD2L2::ENSG00000116670.10	0	-	11740675	11752207	0	5	418,274,433,78,295,	0,822,10359,11032,11237,
chr1	11751285	11752285	gencode::DRAXIN::ENSG00000162490.6	0	+	11751285	11752285	0	3	182,78,373,	0,422,627,
chr1	11795640	11796731	gencode::AGTRAP::ENSG00000177674.11	0	+	11795640	11796731	0	2	500,437,	0,654,
chr1	11821343	11824961	gencode::C1orf167::ENSG00000215910.3	0	+	11821343	11824961	0	4	500,10,424,420,	0,990,2618,3198,
chr1	11862802	11866615	gencode::MTHFR::ENSG00000177000.6	0	-	11862802	11866615	0	6	133,157,464,472,91,207,	0,500,2168,2668,3313,3606,
chr1	11865706	11866816	gencode::CLCN6::ENSG00000011021.17	0	+	11865706	11866816	0	3	236,91,408,	0,409,702,
chr1	11907498	11908902	gencode::NPPA::ENSG00000175206.6	0	-	11907498	11908902	0	3	118,295,500,	0,342,904,
chr1	11918528	11919488	gencode::NPPB::ENSG00000120937.8	0	-	11918528	11919488	0	2	228,500,	0,460,
chr1	11986485	11986985	gencode::KIAA2013::ENSG00000116685.11	0	-	11986485	11986985	0	1	500,	0,
chr1	11994291	11995309	gencode::PLOD1::ENSG00000083444.12	0	+	11994291	11995309	0	2	500,395,	0,623,
chr1	12039737	12040868	gencode::MFN2::ENSG00000116688.12	0	+	12039737	12040868	0	2	500,325,	0,806,
chr1	12079022	12080089	gencode::MIIP::ENSG00000116691.6	0	+	12079022	12080089	0	2	500,478,	0,589,
chr1	12122933	12186455	gencode::TNFRSF8::ENSG00000120949.10	0	+	12122933	12186455	0	5	500,306,500,126,160,	0,787,62522,63178,63362,
chr1	12226559	12227559	gencode::TNFRSF1B::ENSG00000028137.12	0	+	12226559	12227559	0	2	500,331,	0,669,
chr1	12289623	12539103	gencode::VPS13D::ENSG00000048707.9	0	+	12289623	12539103	0	8	500,444,500,474,500,188,500,173,	0,556,179800,180326,234871,235683,248480,249307,
chr1	12677737	12678237	gencode::DHRS3::ENSG00000162496.4	0	-	12677737	12678237	0	1	500,	0,
chr1	12704065	12705065	gencode::AADACL4::ENSG00000204518.2	0	+	12704065	12705065	0	2	500,330,	0,670,
chr1	12775617	12776645	gencode::AADACL3::ENSG00000188984.7	0	+	12775617	12776645	0	2	500,296,	0,732,
chr1	12805662	12806872	gencode::C1orf158::ENSG00000157330.5	0	+	12805662	12806872	0	2	500,381,	0,829,
chr1	12834483	12835483	gencode::PRAMEF12::ENSG00000116726.4	0	+	12834483	12835483	0	2	500,184,	0,816,
chr1	12851045	12855339	gencode::PRAMEF1::ENSG00000116721.9	0	+	12851045	12855339	0	4	500,420,195,219,	0,580,3599,4075,
chr1	12890764	12891764	gencode::PRAMEF11::ENSG00000204513.5	0	-	12890764	12891764	0	2	443,500,	0,500,
chr1	12908325	12909078	gencode::HNRNPCL1::ENSG00000179172.7	0	-	12908325	12909078	0	2	206,500,	0,253,
chr1	12916440	12917440	gencode::PRAMEF2::ENSG00000120952.4	0	+	12916440	12917440	0	2	500,436,	0,564,
chr1	12945525	12946525	gencode::PRAMEF4::ENSG00000243073.3	0	-	12945525	12946525	0	2	443,500,	0,500,
chr1	12957601	12958601	gencode::PRAMEF10::ENSG00000187545.5	0	-	12957601	12958601	0	2	443,500,	0,500,
chr1	12975949	12976949	gencode::PRAMEF7::ENSG00000204510.1	0	+	12975949	12976949	0	2	500,440,	0,560,
chr1	13004746	13118251	gencode::PRAMEF6::ENSG00000232423.3	0	-	13004746	13118251	0	8	434,500,420,500,434,500,435,500,	0,500,2174,2674,110332,110832,112490,113005,
chr1	13035042	13036042	gencode::PRAMEF22::ENSG00000204508.3	0	+	13035042	13036042	0	2	500,205,	0,795,
chr1	13052998	13053498	gencode::WI2-3308P17.2::ENSG00000239810.2	0	-	13052998	13053498	0	1	500,	0,
chr1	13219581	13220081	gencode::PRAMEF26::ENSG00000229571.2	0	-	13219581	13220081	0	1	500,	0,
chr1	13331192	13332192	gencode::PRAMEF3::ENSG00000204503.5	0	-	13331192	13332192	0	2	184,500,	0,500,
chr1	13359318	13360318	gencode::PRAMEF5::ENSG00000204502.2	0	+	13359318	13360318	0	2	500,420,	0,580,
chr1	13390265	13391265	gencode::PRAMEF8::ENSG00000182330.6	0	-	13390265	13391265	0	2	440,500,	0,500,
chr1	13420675	13421675	gencode::PRAMEF9::ENSG00000204501.2	0	+	13420675	13421675	0	2	500,420,	0,580,
chr1	13452156	13453156	gencode::PRAMEF13::ENSG00000204495.3	0	-	13452156	13453156	0	2	420,500,	0,500,
chr1	13477022	13478022	gencode::PRAMEF18::ENSG00000204491.2	0	-	13477022	13478022	0	2	211,500,	0,500,
chr1	13494753	13495753	gencode::PRAMEF16::ENSG00000204488.3	0	+	13494753	13495753	0	2	500,181,	0,819,
chr1	13515565	13522472	gencode::PRAMEF21::ENSG00000204486.3	0	+	13515565	13522472	0	4	500,403,494,211,	0,597,5907,6696,
chr1	13641472	13642472	gencode::PRAMEF15::ENSG00000157358.7	0	+	13641472	13642472	0	2	500,420,	0,580,
chr1	13673011	13674011	gencode::PRAMEF14::ENSG00000204481.6	0	-	13673011	13674011	0	2	420,500,	0,500,
chr1	13697687	13698905	gencode::PRAMEF19::ENSG00000204480.6	0	-	13697687	13698905	0	2	382,500,	0,718,
chr1	13715591	13716591	gencode::PRAMEF17::ENSG00000204479.4	0	+	13715591	13716591	0	2	500,185,	0,815,
chr1	13736406	13743307	gencode::PRAMEF20::ENSG00000204478.5	0	+	13736406	13743307	0	4	500,403,498,207,	0,597,5901,6694,
chr1	13840543	13841043	gencode::LRRC38::ENSG00000162494.5	0	-	13840543	13841043	0	1	500,	0,
chr1	13909459	13912466	gencode::PDPN::ENSG00000162493.12	0	+	13909459	13912466	0	5	500,76,426,500,330,	0,1226,1379,1996,2677,
chr1	14026234	14076430	gencode::PRDM2::ENSG00000116731.18	0	+	14026234	14076430	0	5	500,437,500,456,446,	0,563,4615,49163,49750,
chr1	14924699	15272914	gencode::KAZN::ENSG00000189337.11	0	+	14924699	15272914	0	7	500,500,55,500,253,500,243,	0,325426,326371,331096,331843,347215,347972,
chr1	15478527	15480784	gencode::TMEM51::ENSG00000171729.9	0	+	15478527	15480784	0	4	500,279,500,332,	0,755,1201,1925,
chr1	15497274	15498313	gencode::C1orf195::ENSG00000204464.3	0	-	15497274	15498313	0	2	400,500,	0,539,
chr1	15573267	15672093	gencode::FHAD1::ENSG00000142621.15	0	+	15573267	15672093	0	9	500,374,484,405,500,465,483,221,72,	0,626,4513,5108,58508,59050,97826,98421,98754,
chr1	15735890	15736890	gencode::EFHD2::ENSG00000142634.8	0	+	15735890	15736890	0	2	500,113,	0,887,
chr1	15764434	15765437	gencode::CTRC::ENSG00000162438.7	0	+	15764434	15765437	0	2	500,435,	0,568,
chr1	15782723	15783723	gencode::CELA2A::ENSG00000142615.7	0	+	15782723	15783723	0	3	500,288,52,	0,567,948,
chr1	15802095	15803095	gencode::CELA2B::ENSG00000215704.5	0	+	15802095	15803095	0	3	500,287,53,	0,567,947,
chr1	15850290	15851721	gencode::CASP9::ENSG00000132906.13	0	-	15850290	15851721	0	3	271,135,500,	0,650,931,
chr1	15852807	15853807	gencode::DNAJC16::ENSG00000116138.8	0	+	15852807	15853807	0	2	500,352,	0,648,
chr1	15911105	15912105	gencode::AGMAT::ENSG00000116771.5	0	-	15911105	15912105	0	2	83,500,	0,500,
chr1	15943494	15944494	gencode::DDI2::ENSG00000197312.7	0	+	15943494	15944494	0	2	500,189,	0,811,
chr1	15985863	15986329	gencode::RSC1A1::ENSG00000215695.1	0	+	15985863	15986329	0	1	466,	0,
chr1	16010326	16011384	gencode::PLEKHM2::ENSG00000116786.7	0	+	16010326	16011384	0	2	500,269,	0,789,
chr1	16062399	16063399	gencode::SLC25A34::ENSG00000162461.7	0	+	16062399	16063399	0	2	500,39,	0,961,
chr1	16068416	16069416	gencode::TMEM82::ENSG00000162460.6	0	+	16068416	16069416	0	3	500,183,12,	0,728,988,
chr1	16082653	16091947	gencode::FBLIM1::ENSG00000162458.8	0	+	16082653	16091947	0	8	500,424,253,87,409,492,265,217,	0,576,1760,2173,2692,7840,8529,9077,
chr1	16173858	16174858	gencode::SPEN::ENSG00000065526.6	0	+	16173858	16174858	0	2	500,211,	0,789,
chr1	16302074	16303127	gencode::ZBTB17::ENSG00000116809.7	0	-	16302074	16303127	0	2	401,500,	0,553,
chr1	16330230	16331230	gencode::C1orf64::ENSG00000183888.4	0	+	16330230	16331230	0	2	500,348,	0,652,
chr1	16344000	16346589	gencode::HSPB7::ENSG00000173641.13	0	-	16344000	16346589	0	3	79,341,500,	0,1285,2089,
chr1	16347865	16349046	gencode::CLCNKA::ENSG00000186510.7	0	+	16347865	16349046	0	3	500,68,486,	0,550,695,
chr1	16369771	16375783	gencode::CLCNKB::ENSG00000184908.13	0	+	16369771	16375783	0	6	500,394,52,79,204,41,	0,606,5012,5146,5308,5971,
chr1	16399621	16400621	gencode::FAM131C::ENSG00000185519.8	0	-	16399621	16400621	0	2	292,500,	0,500,
chr1	16482082	16483082	gencode::EPHA2::ENSG00000142627.9	0	-	16482082	16483082	0	2	258,500,	0,500,
chr1	16538604	16539604	gencode::ARHGEF19::ENSG00000142632.12	0	-	16538604	16539604	0	2	390,500,	0,500,
chr1	16555560	16556538	gencode::C1orf134::ENSG00000204377.3	0	-	16555560	16556538	0	2	415,500,	0,478,
chr1	16563657	16564157	gencode::RSG1::ENSG00000132881.7	0	-	16563657	16564157	0	1	500,	0,
chr1	16678449	16679449	gencode::FBXO42::ENSG00000037637.6	0	-	16678449	16679449	0	2	298,500,	0,500,
chr1	16693077	16694259	gencode::SZRD1::ENSG00000055070.12	0	+	16693077	16694259	0	2	500,454,	0,728,
chr1	16763185	16764419	gencode::SPATA21::ENSG00000187144.7	0	-	16763185	16764419	0	2	435,500,	0,734,
chr1	16766666	16767730	gencode::NECAP2::ENSG00000157191.15	0	+	16766666	16767730	0	2	500,380,	0,684,
chr1	16865060	16865560	gencode::AL355149.2::ENSG00000268674.1	0	+	16865060	16865560	0	1	500,	0,
chr1	16900551	16940482	gencode::NBPF1::ENSG00000219481.6	0	-	16900551	16940482	0	8	428,362,284,497,323,463,348,500,	0,638,1924,2427,4811,5348,38931,39431,
chr1	16998997	16999497	gencode::AL137798.1::ENSG00000237847.2	0	+	16998997	16999497	0	1	500,	0,
chr1	17060956	17061456	gencode::AL021920.2::ENSG00000268991.1	0	-	17060956	17061456	0	1	500,	0,
chr1	17247944	17248944	gencode::CROCC::ENSG00000058453.12	0	+	17247944	17248944	0	2	500,369,	0,631,
chr1	17304271	17307830	gencode::MFAP2::ENSG00000117122.9	0	-	17304271	17307830	0	4	458,460,406,500,	0,540,2402,3059,
chr1	17337767	17338923	gencode::ATP13A2::ENSG00000159363.13	0	-	17337767	17338923	0	2	454,500,	0,656,
chr1	17380165	17381165	gencode::SDHB::ENSG00000117118.5	0	-	17380165	17381165	0	2	275,500,	0,500,
chr1	17445430	17446448	gencode::PADI2::ENSG00000117115.8	0	-	17445430	17446448	0	2	342,500,	0,518,
chr1	17531120	17560349	gencode::PADI1::ENSG00000142623.8	0	+	17531120	17560349	0	5	500,314,36,308,414,	0,686,28155,28347,28815,
chr1	17575092	17576092	gencode::PADI3::ENSG00000142619.4	0	+	17575092	17576092	0	2	500,366,	0,634,
chr1	17634189	17635191	gencode::PADI4::ENSG00000159339.9	0	+	17634189	17635191	0	2	500,380,	0,622,
chr1	17675570	17676570	gencode::AC004824.2::ENSG00000269468.1	0	-	17675570	17676570	0	2	409,500,	0,500,
chr1	17764557	17766720	gencode::RCC2::ENSG00000179051.9	0	-	17764557	17766720	0	4	166,500,318,500,	0,500,1163,1663,
chr1	17865829	17945348	gencode::ARHGEF10L::ENSG00000074964.12	0	+	17865829	17945348	0	8	500,382,498,418,500,434,500,329,	0,618,40718,41300,48581,49147,78481,79190,
chr1	18081307	18082307	gencode::ACTL8::ENSG00000117148.6	0	+	18081307	18082307	0	2	500,306,	0,694,
chr1	18433739	18434739	gencode::IGSF21::ENSG00000117154.7	0	+	18433739	18434739	0	2	500,45,	0,955,
chr1	18806923	18807423	gencode::KLHDC7A::ENSG00000179023.7	0	+	18806923	18807423	0	1	500,	0,
chr1	18956999	18958517	gencode::PAX7::ENSG00000009709.7	0	+	18956999	18958517	0	2	500,333,	0,1185,
chr1	19185676	19186676	gencode::TAS1R2::ENSG00000179002.5	0	-	19185676	19186676	0	2	294,500,	0,500,
chr1	19216885	19229775	gencode::ALDH4A1::ENSG00000159423.12	0	-	19216885	19229775	0	4	300,500,431,500,	0,500,11637,12390,
chr1	19283180	19283680	gencode::IFFO2::ENSG00000169991.6	0	-	19283180	19283680	0	1	500,	0,
chr1	19408734	19537270	gencode::UBR4::ENSG00000127481.10	0	-	19408734	19537270	0	12	500,439,476,390,484,166,129,225,20,390,318,500,	0,16915,17439,18887,19403,22176,22676,22951,36609,36719,127512,128036,
chr1	19577503	19578546	gencode::EMC1::ENSG00000127463.9	0	-	19577503	19578546	0	2	403,187,	0,856,
chr1	19577532	19578532	gencode::MRTO4::ENSG00000053372.4	0	+	19577532	19578532	0	2	374,173,	0,827,
chr1	19600068	19601068	gencode::AKR7L::ENSG00000211454.9	0	-	19600068	19601068	0	2	284,500,	0,500,
chr1	19615744	19616244	gencode::AKR7A3::ENSG00000162482.4	0	-	19615744	19616244	0	1	500,	0,
chr1	19638140	19638819	gencode::AKR7A2::ENSG00000053371.8	0	-	19638140	19638819	0	2	178,179,	0,500,
chr1	19638640	19638819	gencode::PQLC2::ENSG00000040487.8	0	+	19638640	19638819	0	1	179,	0,
chr1	19745745	19812566	gencode::CAPZB::ENSG00000077549.13	0	-	19745745	19812566	0	5	407,499,23,769,500,	0,501,64913,65413,66321,
chr1	19922972	19923972	gencode::MINOS1-NBL1::ENSG00000270136.1	0	+	19922972	19923972	0	2	500,367,	0,633,
chr1	19922983	19923983	gencode::MINOS1::ENSG00000173436.9	0	+	19922983	19923983	0	2	489,378,	0,622,
chr1	19969225	19971307	gencode::NBL1::ENSG00000158747.9	0	+	19969225	19971307	0	3	500,763,365,	0,668,1717,
chr1	19991279	19991779	gencode::HTR6::ENSG00000158748.3	0	+	19991279	19991779	0	1	500,	0,
chr1	20125337	20126910	gencode::TMCO4::ENSG00000162542.9	0	-	20125337	20126910	0	3	327,508,500,	0,500,1073,
chr1	20141771	20142271	gencode::RNF186::ENSG00000178828.5	0	-	20141771	20142271	0	1	500,	0,
chr1	20208505	20209505	gencode::OTUD3::ENSG00000169914.5	0	+	20208505	20209505	0	2	500,276,	0,724,
chr1	20249610	20250610	gencode::PLA2G2E::ENSG00000188784.4	0	-	20249610	20250610	0	2	400,500,	0,500,
chr1	20306409	20307432	gencode::PLA2G2A::ENSG00000188257.6	0	-	20306409	20307432	0	2	443,500,	0,523,
chr1	20396200	20397200	gencode::PLA2G5::ENSG00000127472.6	0	+	20396200	20397200	0	2	500,240,	0,760,
chr1	20445550	20446550	gencode::PLA2G2D::ENSG00000117215.10	0	-	20445550	20446550	0	2	399,500,	0,500,
chr1	20465318	20466318	gencode::PLA2G2F::ENSG00000158786.4	0	+	20465318	20466318	0	2	500,280,	0,720,
chr1	20501187	20504417	gencode::PLA2G2C::ENSG00000187980.6	0	-	20501187	20504417	0	4	310,500,397,500,	0,500,2230,2730,
chr1	20512077	20513077	gencode::UBXN10::ENSG00000162543.5	0	+	20512077	20513077	0	2	500,429,	0,571,
chr1	20616911	20617911	gencode::VWA5B1::ENSG00000158816.11	0	+	20616911	20617911	0	2	500,328,	0,672,
chr1	20812713	20813213	gencode::CAMK2N1::ENSG00000162545.5	0	-	20812713	20813213	0	1	500,	0,
chr1	20834154	20835154	gencode::MUL1::ENSG00000090432.5	0	-	20834154	20835154	0	2	241,500,	0,500,
chr1	20878431	20878931	gencode::FAM43B::ENSG00000183114.6	0	+	20878431	20878931	0	1	500,	0,
chr1	20914940	20915940	gencode::CDA::ENSG00000158825.5	0	+	20914940	20915940	0	2	500,162,	0,838,
chr1	20959447	20960447	gencode::PINK1::ENSG00000158828.5	0	+	20959447	20960447	0	2	500,17,	0,983,
chr1	20987486	20988500	gencode::DDOST::ENSG00000244038.5	0	-	20987486	20988500	0	2	201,500,	0,514,
chr1	21043484	21045010	gencode::KIF17::ENSG00000117245.8	0	-	21043484	21045010	0	2	355,500,	0,1026,
chr1	21058529	21059633	gencode::SH2D5::ENSG00000189410.7	0	-	21058529	21059633	0	2	142,500,	0,604,
chr1	21101498	21113681	gencode::HP1BP3::ENSG00000127483.13	0	-	21101498	21113681	0	4	500,371,6,500,	0,11135,11635,11683,
chr1	21225906	21503843	gencode::EIF4G3::ENSG00000075151.15	0	-	21225906	21503843	0	14	281,468,123,91,463,435,461,498,427,493,470,500,359,500,	0,532,41705,41984,73123,73688,150989,151583,189295,189802,274824,275324,276947,277437,
chr1	21605542	21672497	gencode::ECE1::ENSG00000117298.10	0	-	21605542	21672497	0	7	139,500,310,104,500,369,500,	0,500,10708,11208,11440,65955,66455,
chr1	21766120	21767156	gencode::NBPF3::ENSG00000142794.14	0	+	21766120	21767156	0	2	500,313,	0,723,
chr1	21835357	21901470	gencode::ALPL::ENSG00000162551.9	0	+	21835357	21901470	0	10	500,352,500,348,394,437,500,426,500,232,	0,655,41914,42566,44717,45280,60938,61512,65113,65881,
chr1	21946034	21996299	gencode::RAP1GAP::ENSG00000076864.15	0	-	21946034	21996299	0	8	471,489,423,500,421,500,450,500,	0,511,2372,2872,31814,32314,49260,49765,
chr1	22051612	22110599	gencode::USP48::ENSG00000090686.11	0	-	22051612	22110599	0	3	500,330,500,	0,57372,58487,
chr1	22138257	22139355	gencode::LDLRAD2::ENSG00000187942.7	0	+	22138257	22139355	0	2	500,324,	0,774,
chr1	22181478	22264290	gencode::HSPG2::ENSG00000142798.12	0	-	22181478	22264290	0	5	316,72,107,355,500,	0,463,692,81812,82312,
chr1	22303013	22304013	gencode::CELA3B::ENSG00000219073.3	0	+	22303013	22304013	0	2	500,436,	0,564,
chr1	22327648	22328652	gencode::CELA3A::ENSG00000142789.15	0	+	22327648	22328652	0	2	500,440,	0,564,
chr1	22378619	22379703	gencode::CDC42::ENSG00000070831.11	0	+	22378619	22379703	0	2	500,466,	0,618,
chr1	22468959	22470885	gencode::WNT4::ENSG00000162552.10	0	-	22468959	22470885	0	3	377,763,500,	0,500,1426,
chr1	22777843	22778971	gencode::ZBTB40::ENSG00000184677.12	0	+	22777843	22778971	0	2	500,472,	0,656,
chr1	22889556	22890569	gencode::EPHA8::ENSG00000070886.6	0	+	22889556	22890569	0	2	500,345,	0,668,
chr1	22962498	22964572	gencode::C1QA::ENSG00000173372.12	0	+	22962498	22964572	0	4	500,301,500,298,	0,699,1074,1776,
chr1	22969622	22970501	gencode::C1QC::ENSG00000159189.7	0	+	22969622	22970501	0	2	500,120,	0,759,
chr1	22978973	22980181	gencode::C1QB::ENSG00000173369.11	0	+	22978973	22980181	0	2	500,383,	0,825,
chr1	23036831	23102170	gencode::EPHB2::ENSG00000133216.12	0	+	23036831	23102170	0	4	500,424,500,431,	0,707,64339,64908,
chr1	23291331	23292331	gencode::LACTBL1::ENSG00000215906.4	0	-	23291331	23292331	0	2	449,500,	0,500,
chr1	23341843	23342843	gencode::C1orf234::ENSG00000227868.2	0	-	23341843	23342843	0	2	419,500,	0,500,
chr1	23345440	23346487	gencode::KDM1A::ENSG00000004487.11	0	+	23345440	23346487	0	2	500,45,	0,1002,
chr1	23435123	23504801	gencode::LUZP1::ENSG00000169641.9	0	-	23435123	23504801	0	6	389,420,446,332,180,500,	0,580,59687,60396,68678,69178,
chr1	23521222	23521722	gencode::HTR1D::ENSG00000179546.3	0	-	23521222	23521722	0	1	500,	0,
chr1	23670255	23671329	gencode::HNRNPR::ENSG00000125944.14	0	-	23670255	23671329	0	2	446,500,	0,574,
chr1	23694379	23695710	gencode::ZNF436::ENSG00000125945.10	0	-	23694379	23695710	0	3	84,500,275,	0,500,1056,
chr1	23695210	23695710	gencode::C1orf213::ENSG00000249087.3	0	+	23695210	23695710	0	1	500,	0,
chr1	23745379	23751733	gencode::TCEA3::ENSG00000204219.5	0	-	23745379	23751733	0	4	188,500,355,500,	0,500,5321,5854,
chr1	23762670	23811172	gencode::ASAP3::ENSG00000088280.14	0	-	23762670	23811172	0	5	380,231,81,324,500,	0,500,869,47501,48002,
chr1	23857712	23858212	gencode::E2F2::ENSG00000007968.6	0	-	23857712	23858212	0	1	500,	0,
chr1	23886285	23886785	gencode::ID3::ENSG00000117318.8	0	-	23886285	23886785	0	1	500,	0,
chr1	23953323	23954268	gencode::MDS2::ENSG00000197880.4	0	+	23953323	23954268	0	2	500,239,	0,706,
chr1	24017768	24018768	gencode::RPL11::ENSG00000142676.8	0	+	24017768	24018768	0	2	500,447,	0,553,
chr1	24069144	24070461	gencode::TCEB3::ENSG00000011007.8	0	+	24069144	24070461	0	2	500,391,	0,926,
chr1	24104394	24112162	gencode::PITHD1::ENSG00000057757.5	0	+	24104394	24112162	0	4	500,189,500,359,	0,811,6787,7409,
chr1	24116959	24120642	gencode::LYPLA2::ENSG00000011009.6	0	+	24116959	24120642	0	6	500,468,434,103,128,14,	0,783,2749,3285,3463,3669,
chr1	24126392	24127392	gencode::GALE::ENSG00000117308.10	0	-	24126392	24127392	0	2	482,500,	0,500,
chr1	24151418	24165610	gencode::HMGCL::ENSG00000117305.10	0	-	24151418	24165610	0	3	425,500,500,	0,531,13692,
chr1	24194284	24195284	gencode::FUCA1::ENSG00000179163.11	0	-	24194284	24195284	0	2	101,500,	0,500,
chr1	24239352	24286049	gencode::CNR2::ENSG00000188822.6	0	-	24239352	24286049	0	4	381,500,361,500,	0,500,45697,46197,
chr1	24285801	24287927	gencode::PNRC2::ENSG00000189266.7	0	+	24285801	24287927	0	4	500,327,459,301,	0,689,1156,1825,
chr1	24306284	24307346	gencode::SRSF10::ENSG00000188529.10	0	-	24306284	24307346	0	2	394,500,	0,562,
chr1	24392569	24439165	gencode::MYOM3::ENSG00000142661.14	0	-	24392569	24439165	0	4	25,435,353,500,	0,500,45596,46096,
chr1	24469111	24470111	gencode::IL22RA1::ENSG00000142677.3	0	-	24469111	24470111	0	2	416,500,	0,500,
chr1	24513238	24514949	gencode::IFNLR1::ENSG00000185436.7	0	-	24513238	24514949	0	3	440,538,500,	0,513,1211,
chr1	24645311	24650029	gencode::GRHL3::ENSG00000158055.11	0	+	24645311	24650029	0	4	500,316,500,420,	0,928,3718,4298,
chr1	24727449	24742087	gencode::STPG1::ENSG00000001460.13	0	-	24727449	24742087	0	6	357,500,446,500,311,500,	0,500,12266,12781,13638,14138,
chr1	24741783	24746537	gencode::NIPAL3::ENSG00000001461.12	0	+	24741783	24746537	0	4	500,407,241,405,	0,613,3754,4349,
chr1	24828886	24841362	gencode::RCAN3::ENSG00000117602.7	0	+	24828886	24841362	0	4	500,244,492,303,	0,756,11423,12173,
chr1	24882101	24883101	gencode::NCMAP::ENSG00000184454.6	0	+	24882101	24883101	0	2	500,439,	0,561,
chr1	24969002	24975916	gencode::SRRM1::ENSG00000133226.12	0	+	24969002	24975916	0	4	500,449,431,394,	0,838,5914,6520,
chr1	25071347	25072347	gencode::CLIC4::ENSG00000169504.10	0	+	25071347	25072347	0	2	500,229,	0,771,
chr1	25255112	25292001	gencode::RUNX3::ENSG00000020633.14	0	-	25255112	25292001	0	5	416,463,500,27,500,	0,500,1256,35863,36389,
chr1	25558477	25559484	gencode::SYF2::ENSG00000117614.5	0	-	25558477	25559484	0	3	115,228,500,	0,227,507,
chr1	25573522	25574510	gencode::C1orf63::ENSG00000117616.13	0	-	25573522	25574510	0	2	275,500,	0,488,
chr1	25598383	25599538	gencode::RHD::ENSG00000187010.14	0	+	25598383	25599538	0	2	500,350,	0,805,
chr1	25663907	25664407	gencode::TMEM50A::ENSG00000183726.6	0	+	25663907	25664407	0	1	500,	0,
chr1	25737430	25757183	gencode::RHCE::ENSG00000188672.12	0	-	25737430	25757183	0	6	398,459,344,500,245,500,	0,541,9353,9933,18753,19253,
chr1	25756887	25757910	gencode::TMEM57::ENSG00000204178.5	0	+	25756887	25757910	0	2	500,239,	0,784,
chr1	25869570	25870570	gencode::LDLRAP1::ENSG00000157978.7	0	+	25869570	25870570	0	2	500,291,	0,709,
chr1	25943458	26036092	gencode::MAN1C1::ENSG00000117643.10	0	+	25943458	26036092	0	3	500,10,500,	0,1372,92134,
chr1	26126166	26127183	gencode::SEPN1::ENSG00000162430.12	0	+	26126166	26127183	0	2	500,277,	0,740,
chr1	26147288	26147788	gencode::AL020996.1::ENSG00000223474.2	0	-	26147288	26147788	0	2	30,292,	0,208,
chr1	26147288	26148013	gencode::MTFR1L::ENSG00000117640.13	0	+	26147288	26148013	0	2	30,517,	0,208,
chr1	26185403	26186403	gencode::AUNIP::ENSG00000127423.6	0	-	26185403	26186403	0	2	365,500,	0,500,
chr1	26197744	26198244	gencode::PAQR7::ENSG00000182749.5	0	-	26197744	26198244	0	1	500,	0,
chr1	26231119	26233982	gencode::STMN1::ENSG00000117632.16	0	-	26231119	26233982	0	7	33,306,500,196,233,319,500,	0,112,500,1025,1525,1838,2363,
chr1	26324035	26325148	gencode::PAFAH2::ENSG00000158006.9	0	-	26324035	26325148	0	2	478,500,	0,613,
chr1	26347770	26348270	gencode::EXTL1::ENSG00000158008.5	0	+	26347770	26348270	0	1	500,	0,
chr1	26372104	26373124	gencode::SLC30A2::ENSG00000158014.10	0	-	26372104	26373124	0	2	231,500,	0,520,
chr1	26393624	26394624	gencode::TRIM63::ENSG00000158022.6	0	-	26393624	26394624	0	2	200,500,	0,500,
chr1	26437827	26438839	gencode::PDIK1L::ENSG00000175087.5	0	+	26437827	26438839	0	2	500,431,	0,581,
chr1	26485010	26486010	gencode::FAM110D::ENSG00000197245.4	0	+	26485010	26486010	0	2	500,391,	0,609,
chr1	26495861	26496906	gencode::ZNF593::ENSG00000142684.7	0	+	26495861	26496906	0	2	500,230,	0,815,
chr1	26503393	26507158	gencode::CNKSR1::ENSG00000142675.13	0	+	26503393	26507158	0	4	500,407,500,55,	0,699,2765,3710,
chr1	26516551	26517551	gencode::CATSPER4::ENSG00000188782.3	0	+	26516551	26517551	0	2	500,218,	0,782,
chr1	26560190	26561192	gencode::CEP85::ENSG00000130695.9	0	+	26560190	26561192	0	2	500,389,	0,613,
chr1	26605299	26607112	gencode::SH3BGRL3::ENSG00000142669.9	0	+	26605299	26607112	0	2	367,416,	0,1397,
chr1	26632611	26645354	gencode::UBXN11::ENSG00000158062.16	0	-	26632611	26645354	0	4	469,439,191,500,	0,586,11645,12243,
chr1	26643947	26644947	gencode::CD52::ENSG00000169442.4	0	+	26643947	26644947	0	2	500,93,	0,907,
chr1	26669943	26671076	gencode::AIM1L::ENSG00000176092.9	0	-	26669943	26671076	0	2	290,500,	0,633,
chr1	26698726	26699766	gencode::ZNF683::ENSG00000176083.13	0	-	26698726	26699766	0	2	431,500,	0,540,
chr1	26736768	26737807	gencode::LIN28A::ENSG00000131914.6	0	+	26736768	26737807	0	2	500,392,	0,647,
chr1	26758306	26759345	gencode::DHDDS::ENSG00000117682.12	0	+	26758306	26759345	0	2	500,476,	0,563,
chr1	26798509	26799509	gencode::HMGN2::ENSG00000198830.6	0	+	26798509	26799509	0	2	500,389,	0,611,
chr1	26855757	26872842	gencode::RPS6KA1::ENSG00000117676.9	0	+	26855757	26872842	0	8	500,292,500,387,500,388,500,314,	0,719,1451,2174,13345,13957,16085,16771,
chr1	27022023	27099834	gencode::ARID1A::ENSG00000117713.13	0	+	27022023	27099834	0	6	500,500,14,34,175,354,	0,33347,34333,76931,77102,77457,
chr1	27113985	27114485	gencode::PIGV::ENSG00000060642.6	0	+	27113985	27114485	0	1	500,	0,
chr1	27152700	27153700	gencode::ZDHHC18::ENSG00000204160.7	0	+	27152700	27153700	0	2	500,68,	0,932,
chr1	27189132	27189632	gencode::SFN::ENSG00000175793.10	0	+	27189132	27189632	0	1	500,	0,
chr1	27212626	27216979	gencode::GPN2::ENSG00000142751.10	0	-	27212626	27216979	0	3	339,500,191,	0,390,4162,
chr1	27226457	27227457	gencode::GPATCH3::ENSG00000198746.8	0	-	27226457	27227457	0	2	23,500,	0,500,
chr1	27240457	27240957	gencode::NR0B2::ENSG00000131910.4	0	-	27240457	27240957	0	1	500,	0,
chr1	27247716	27248716	gencode::NUDC::ENSG00000090273.9	0	+	27247716	27248716	0	2	500,294,	0,706,
chr1	27286397	27287397	gencode::C1orf172::ENSG00000175707.7	0	-	27286397	27287397	0	2	441,500,	0,500,
chr1	27319697	27320197	gencode::TRNP1::ENSG00000253368.3	0	+	27319697	27320197	0	1	500,	0,
chr1	27338827	27339827	gencode::FAM46B::ENSG00000158246.7	0	-	27338827	27339827	0	2	68,500,	0,500,
chr1	27481401	27481901	gencode::SLC9A1::ENSG00000090020.6	0	-	27481401	27481901	0	1	500,	0,
chr1	27560506	27561658	gencode::WDTC1::ENSG00000142784.11	0	+	27560506	27561658	0	2	500,214,	0,938,
chr1	27648150	27649238	gencode::TMEM222::ENSG00000186501.10	0	+	27648150	27649238	0	2	500,354,	0,734,
chr1	27668012	27671363	gencode::SYTL1::ENSG00000142765.13	0	+	27668012	27671363	0	3	500,369,500,	0,631,2851,
chr1	27693383	27693883	gencode::MAP3K6::ENSG00000142733.10	0	-	27693383	27693883	0	1	500,	0,
chr1	27700815	27701815	gencode::FCN3::ENSG00000142748.8	0	-	27700815	27701815	0	3	29,272,500,	0,129,500,
chr1	27709293	27710370	gencode::CD164L2::ENSG00000174950.6	0	-	27709293	27710370	0	2	346,500,	0,577,
chr1	27718647	27719647	gencode::GPR3::ENSG00000181773.6	0	+	27718647	27719647	0	2	500,404,	0,596,
chr1	27816062	27817169	gencode::WASF2::ENSG00000158195.6	0	-	27816062	27817169	0	2	432,500,	0,607,
chr1	27929602	27930643	gencode::AHDC1::ENSG00000126705.9	0	-	27929602	27930643	0	2	303,500,	0,541,
chr1	27950073	27962288	gencode::FGR::ENSG00000000938.8	0	-	27950073	27962288	0	6	126,500,303,500,346,500,	0,500,2178,2678,11154,11715,
chr1	27998189	27999229	gencode::IFI6::ENSG00000126709.10	0	-	27998189	27999229	0	2	442,500,	0,540,
chr1	28051989	28053067	gencode::FAM76A::ENSG00000009780.11	0	+	28051989	28053067	0	2	500,393,	0,685,
chr1	28099193	28100193	gencode::STX12::ENSG00000117758.9	0	+	28099193	28100193	0	2	500,255,	0,745,
chr1	28156788	28157288	gencode::PPP1R8::ENSG00000117751.13	0	+	28156788	28157288	0	1	500,	0,
chr1	28198554	28199578	gencode::THEMIS2::ENSG00000130775.11	0	+	28198554	28199578	0	2	500,400,	0,624,
chr1	28240524	28241757	gencode::RPA2::ENSG00000117748.5	0	-	28240524	28241757	0	2	47,500,	0,733,
chr1	28261003	28262120	gencode::SMPDL3B::ENSG00000130768.10	0	+	28261003	28262120	0	2	500,363,	0,754,
chr1	28285668	28285972	gencode::XKR8::ENSG00000158156.7	0	+	28285668	28285972	0	1	304,	0,
chr1	28384098	28415707	gencode::EYA3::ENSG00000158161.11	0	-	28384098	28415707	0	4	404,491,457,500,	0,509,30477,31109,
chr1	28503699	28520947	gencode::PTAFR::ENSG00000169403.7	0	-	28503699	28520947	0	3	500,346,500,	0,16185,16748,
chr1	28526569	28527067	gencode::AL353354.2::ENSG00000269804.1	0	+	28526569	28527067	0	2	443,35,	0,463,
chr1	28526652	28527067	gencode::AL353354.1::ENSG00000215902.1	0	-	28526652	28527067	0	2	360,35,	0,380,
chr1	28559036	28560036	gencode::DNAJC8::ENSG00000126698.6	0	-	28559036	28560036	0	2	393,500,	0,500,
chr1	28562119	28562869	gencode::ATPIF1::ENSG00000130770.13	0	+	28562119	28562869	0	2	500,86,	0,664,
chr1	28585537	28586537	gencode::SESN2::ENSG00000130766.4	0	+	28585537	28586537	0	2	500,87,	0,913,
chr1	28655048	28656065	gencode::MED18::ENSG00000130772.9	0	+	28655048	28656065	0	2	500,372,	0,645,
chr1	28695613	28765181	gencode::PHACTR4::ENSG00000204138.8	0	+	28695613	28765181	0	4	500,275,500,238,	0,725,68568,69330,
chr1	28831954	28845268	gencode::RCC1::ENSG00000180198.11	0	+	28831954	28845268	0	4	500,470,500,446,	0,644,12193,12868,
chr1	28879096	28880096	gencode::TRNAU1AP::ENSG00000180098.5	0	+	28879096	28880096	0	2	500,445,	0,555,
chr1	28918211	28919211	gencode::RAB42::ENSG00000188060.6	0	+	28918211	28919211	0	2	500,298,	0,702,
chr1	28969017	28970078	gencode::TAF12::ENSG00000120656.7	0	-	28969017	28970078	0	2	147,500,	0,561,
chr1	28994743	28995791	gencode::GMEB1::ENSG00000162419.8	0	+	28994743	28995791	0	2	500,438,	0,610,
chr1	29062632	29063951	gencode::YTHDF2::ENSG00000198492.10	0	+	29062632	29063951	0	2	500,290,	0,1029,
chr1	29138153	29139153	gencode::OPRD1::ENSG00000116329.6	0	+	29138153	29139153	0	2	500,29,	0,971,
chr1	29213102	29241590	gencode::EPB41::ENSG00000159023.14	0	+	29213102	29241590	0	6	500,459,500,401,500,308,	0,622,6650,7249,27488,28180,
chr1	29448513	29450947	gencode::TMEM200B::ENSG00000253304.1	0	-	29448513	29450947	0	4	360,500,418,500,	0,500,1434,1934,
chr1	29507910	29508999	gencode::SRSF4::ENSG00000116350.11	0	-	29507910	29508999	0	2	245,500,	0,589,
chr1	29556936	29557944	gencode::MECR::ENSG00000116353.11	0	-	29556936	29557944	0	2	304,500,	0,508,
chr1	29562527	29563650	gencode::PTPRU::ENSG00000060656.15	0	+	29562527	29563650	0	2	500,419,	0,704,
chr1	31195934	31196934	gencode::MATN1::ENSG00000162510.5	0	-	31195934	31196934	0	2	368,500,	0,500,
chr1	31230167	31231167	gencode::LAPTM5::ENSG00000162511.7	0	-	31230167	31231167	0	2	336,500,	0,500,
chr1	31351589	31382108	gencode::SDC3::ENSG00000162512.11	0	-	31351589	31382108	0	3	498,185,500,	0,29519,30019,
chr1	31538031	31539338	gencode::PUM1::ENSG00000134644.11	0	-	31538031	31539338	0	2	429,500,	0,807,
chr1	31660500	31712901	gencode::NKAIN1::ENSG00000084628.5	0	-	31660500	31712901	0	4	394,464,437,500,	0,536,51401,51901,
chr1	31742513	31770162	gencode::SNRNP40::ENSG00000060688.8	0	-	31742513	31770162	0	4	500,338,179,100,	0,26604,27149,27549,
chr1	31769341	31770382	gencode::ZCCHC17::ENSG00000121766.10	0	+	31769341	31770382	0	3	114,179,320,	0,321,721,
chr1	31845423	31846423	gencode::FABP3::ENSG00000121769.3	0	-	31845423	31846423	0	2	363,500,	0,500,
chr1	31881911	31887159	gencode::SERINC2::ENSG00000168528.7	0	+	31881911	31887159	0	6	500,346,263,500,506,246,	0,790,1373,3551,4242,5002,
chr1	31902114	31903114	gencode::AC114494.1::ENSG00000268950.1	0	-	31902114	31903114	0	2	77,500,	0,500,
chr1	32041615	32042638	gencode::TINAGL1::ENSG00000142910.11	0	+	32041615	32042638	0	2	500,440,	0,583,
chr1	32082800	32085130	gencode::HCRTR1::ENSG00000121764.7	0	+	32082800	32085130	0	5	500,316,214,221,136,	0,684,1340,1619,2194,
chr1	32109974	32110988	gencode::PEF1::ENSG00000162517.8	0	-	32109974	32110988	0	2	465,500,	0,514,
chr1	32169268	32170420	gencode::COL16A1::ENSG00000084636.13	0	-	32169268	32170420	0	2	167,500,	0,652,
chr1	32209960	32230441	gencode::BAI2::ENSG00000121753.8	0	-	32209960	32230441	0	9	286,499,381,96,246,395,500,459,500,	0,374,12458,12924,13154,14564,15064,19063,19981,
chr1	32280976	32282152	gencode::SPOCD1::ENSG00000134668.8	0	-	32280976	32282152	0	2	583,500,	0,676,
chr1	32378673	32379173	gencode::AL136115.1::ENSG00000212673.1	0	+	32378673	32379173	0	1	500,	0,
chr1	32384224	32404488	gencode::PTP4A2::ENSG00000184007.13	0	-	32384224	32404488	0	4	344,323,97,500,	0,1037,19264,19764,
chr1	32478929	32480096	gencode::KHDRBS1::ENSG00000121774.13	0	+	32478929	32480096	0	2	500,116,	0,1051,
chr1	32538002	32539096	gencode::TMEM39B::ENSG00000121775.13	0	+	32538002	32539096	0	2	500,442,	0,652,
chr1	32573138	32609079	gencode::KPNA6::ENSG00000025800.9	0	+	32573138	32609079	0	5	500,151,291,500,452,	0,599,959,34941,35489,
chr1	32644786	32646165	gencode::TXLNA::ENSG00000084652.11	0	+	32644786	32646165	0	3	500,286,48,	0,593,1331,
chr1	32665486	32666733	gencode::CCDC28B::ENSG00000160050.10	0	+	32665486	32666733	0	2	500,421,	0,826,
chr1	32670988	32671752	gencode::IQCC::ENSG00000160051.7	0	+	32670988	32671752	0	2	247,186,	0,578,
chr1	32674288	32675194	gencode::DCDC2B::ENSG00000222046.2	0	+	32674288	32675194	0	2	406,232,	0,674,
chr1	32687426	32688472	gencode::TMEM234::ENSG00000160055.15	0	-	32687426	32688472	0	4	39,284,89,239,	0,195,621,807,
chr1	32687621	32688470	gencode::EIF3I::ENSG00000084623.7	0	+	32687621	32688470	0	3	284,89,237,	0,426,612,
chr1	32712333	32713333	gencode::FAM167B::ENSG00000183615.5	0	+	32712333	32713333	0	2	500,48,	0,952,
chr1	32716339	32740335	gencode::LCK::ENSG00000182866.12	0	+	32716339	32740335	0	5	500,365,500,94,298,	0,635,22893,23490,23698,
chr1	32757186	32758492	gencode::HDAC1::ENSG00000116478.7	0	+	32757186	32758492	0	3	500,171,452,	0,635,854,
chr1	32801480	32802480	gencode::MARCKSL1::ENSG00000175130.6	0	-	32801480	32802480	0	2	65,500,	0,500,
chr1	32827297	32827556	gencode::TSSK3::ENSG00000162526.6	0	+	32827297	32827556	0	2	31,77,	0,182,
chr1	32827479	32827556	gencode::FAM229A::ENSG00000225828.1	0	-	32827479	32827556	0	1	77,	0,
chr1	32859527	32860549	gencode::BSDC1::ENSG00000160058.14	0	-	32859527	32860549	0	3	151,259,500,	0,216,522,
chr1	32930169	32931169	gencode::ZBTB8B::ENSG00000273274.1	0	+	32930169	32931169	0	2	500,461,	0,539,
chr1	33004527	33005529	gencode::ZBTB8A::ENSG00000160062.10	0	+	33004527	33005529	0	2	500,354,	0,648,
chr1	33115661	33116685	gencode::ZBTB8OS::ENSG00000176261.11	0	-	33115661	33116685	0	2	370,500,	0,524,
chr1	33116242	33117456	gencode::RBBP4::ENSG00000162521.14	0	+	33116242	33117456	0	3	500,31,421,	0,683,793,
chr1	33167861	33169220	gencode::SYNC::ENSG00000162520.10	0	-	33167861	33169220	0	2	345,500,	0,859,
chr1	33206985	33231767	gencode::KIAA1522::ENSG00000162522.6	0	+	33206985	33231767	0	6	500,193,500,338,500,337,	0,807,12136,12798,23749,24445,
chr1	33282542	33282786	gencode::S100PBP::ENSG00000116497.13	0	+	33282542	33282786	0	1	244,	0,
chr1	33283754	33284254	gencode::YARS::ENSG00000134684.6	0	-	33283754	33284254	0	1	500,	0,
chr1	33335914	33338581	gencode::FNDC5::ENSG00000160097.11	0	-	33335914	33338581	0	4	337,500,411,500,	0,500,1667,2167,
chr1	33351535	33352535	gencode::HPCA::ENSG00000121905.5	0	+	33351535	33352535	0	2	500,417,	0,583,
chr1	33366459	33367490	gencode::TMEM54::ENSG00000121900.14	0	-	33366459	33367490	0	2	362,500,	0,531,
chr1	33430286	33430786	gencode::RNF19B::ENSG00000116514.12	0	-	33430286	33430786	0	1	500,	0,
chr1	33438767	33439767	gencode::FKSG48::ENSG00000267885.1	0	+	33438767	33439767	0	2	500,125,	0,875,
chr1	33501941	33503093	gencode::AK2::ENSG00000004455.12	0	-	33501941	33503093	0	2	393,500,	0,652,
chr1	33546213	33548350	gencode::ADC::ENSG00000142920.12	0	+	33546213	33548350	0	5	500,89,88,361,393,	0,684,898,1202,1744,
chr1	33641651	33647767	gencode::TRIM62::ENSG00000116525.9	0	-	33641651	33647767	0	3	355,500,500,	0,500,5616,
chr1	33721673	33736675	gencode::ZNF362::ENSG00000160094.10	0	+	33721673	33736675	0	4	500,416,410,460,	0,584,14002,14542,
chr1	33777322	33787199	gencode::A3GALT2::ENSG00000184389.8	0	-	33777322	33787199	0	5	328,277,129,475,500,	0,500,871,8877,9377,
chr1	33814986	33896716	gencode::PHC2::ENSG00000134686.12	0	-	33814986	33896716	0	8	209,500,126,454,270,498,63,500,	0,500,5324,5870,25708,26210,80730,81230,
chr1	33937745	33938751	gencode::ZSCAN20::ENSG00000121903.10	0	+	33937745	33938751	0	2	500,457,	0,549,
chr1	34091684	34631375	gencode::CSMD2::ENSG00000121904.13	0	-	34091684	34631375	0	8	399,500,82,500,280,500,134,500,	0,500,82920,83420,187636,188136,538691,539191,
chr1	34325575	34326600	gencode::HMGB4::ENSG00000176256.6	0	+	34325575	34326600	0	2	500,107,	0,918,
chr1	34631983	34643770	gencode::C1orf94::ENSG00000142698.10	0	+	34631983	34643770	0	4	500,209,500,58,	0,791,10787,11729,
chr1	35220147	35221147	gencode::GJB5::ENSG00000189280.3	0	+	35220147	35221147	0	2	500,349,	0,651,
chr1	35224841	35225841	gencode::GJB4::ENSG00000189433.5	0	+	35224841	35225841	0	2	500,450,	0,550,
chr1	35246289	35248378	gencode::GJB3::ENSG00000188910.7	0	+	35246289	35248378	0	3	500,497,333,	0,1092,1756,
chr1	35258098	35259098	gencode::GJA4::ENSG00000187513.8	0	+	35258098	35259098	0	2	500,427,	0,573,
chr1	35324670	35325917	gencode::SMIM12::ENSG00000163866.8	0	-	35324670	35325917	0	2	383,500,	0,747,
chr1	35371037	35395686	gencode::DLGAP3::ENSG00000116544.7	0	-	35371037	35395686	0	3	447,363,500,	0,23649,24149,
chr1	35450454	35451454	gencode::ZMYM6NB::ENSG00000243749.1	0	-	35450454	35451454	0	2	342,500,	0,500,
chr1	35496791	35498069	gencode::ZMYM6::ENSG00000163867.12	0	-	35496791	35498069	0	4	74,289,122,500,	0,149,500,778,
chr1	35544467	35545491	gencode::ZMYM1::ENSG00000197056.5	0	+	35544467	35545491	0	2	500,446,	0,578,
chr1	35658749	35659249	gencode::SFPQ::ENSG00000116560.6	0	-	35658749	35659249	0	1	500,	0,
chr1	35734067	35735067	gencode::ZMYM4::ENSG00000146463.7	0	+	35734067	35735067	0	2	500,379,	0,621,
chr1	35919808	36023073	gencode::KIAA0319L::ENSG00000142687.13	0	-	35919808	36023073	0	5	152,124,500,291,59,	0,280,500,102706,103206,
chr1	36022573	36023908	gencode::NCDN::ENSG00000020129.11	0	+	36022573	36023908	0	3	232,59,82,	0,441,1253,
chr1	36038470	36039470	gencode::TFAP2E::ENSG00000116819.6	0	+	36038470	36039470	0	2	500,263,	0,737,
chr1	36107445	36107945	gencode::PSMB2::ENSG00000126067.7	0	-	36107445	36107945	0	1	500,	0,
chr1	36185073	36185573	gencode::C1orf216::ENSG00000142686.7	0	-	36185073	36185573	0	1	500,	0,
chr1	36235029	36236068	gencode::CLSPN::ENSG00000092853.9	0	-	36235029	36236068	0	2	416,500,	0,539,
chr1	36273272	36274272	gencode::AGO4::ENSG00000134698.10	0	+	36273272	36274272	0	2	500,234,	0,766,
chr1	36334908	36349309	gencode::AGO1::ENSG00000092847.6	0	+	36334908	36349309	0	4	500,402,500,260,	0,598,13401,14141,
chr1	36395818	36397358	gencode::AGO3::ENSG00000126070.14	0	+	36395818	36397358	0	3	500,277,310,	0,583,1230,
chr1	36549175	36550175	gencode::TEKT2::ENSG00000092850.7	0	+	36549175	36550175	0	2	500,423,	0,577,
chr1	36553975	36554975	gencode::ADPRHL2::ENSG00000116863.10	0	+	36553975	36554975	0	2	500,257,	0,743,
chr1	36565350	36591321	gencode::COL8A2::ENSG00000171812.6	0	-	36565350	36591321	0	4	298,489,334,500,	0,511,24971,25471,
chr1	36614552	36615598	gencode::TRAPPC3::ENSG00000054116.7	0	-	36614552	36615598	0	2	138,500,	0,546,
chr1	36621065	36643471	gencode::MAP7D1::ENSG00000116871.11	0	+	36621065	36643471	0	4	500,236,500,294,	0,1001,21504,22112,
chr1	36689516	36690532	gencode::THRAP3::ENSG00000054118.9	0	+	36689516	36690532	0	2	500,424,	0,592,
chr1	36771493	36773115	gencode::SH3D21::ENSG00000214193.5	0	+	36771493	36773115	0	5	500,169,82,199,227,	0,534,865,1015,1395,
chr1	36788834	36789834	gencode::RP11-268J15.5::ENSG00000116883.8	0	+	36788834	36789834	0	2	500,79,	0,921,
chr1	36789255	36790255	gencode::EVA1B::ENSG00000142694.6	0	-	36789255	36790255	0	2	79,500,	0,500,
chr1	36826441	36851997	gencode::STK40::ENSG00000196182.6	0	-	36826441	36851997	0	4	378,498,336,500,	0,502,24544,25056,
chr1	36862993	36863993	gencode::LSM10::ENSG00000181817.5	0	-	36862993	36863993	0	2	372,500,	0,500,
chr1	36906076	36916586	gencode::OSCP1::ENSG00000116885.14	0	-	36906076	36916586	0	4	341,500,322,500,	0,500,9458,10010,
chr1	36929538	36930538	gencode::MRPS15::ENSG00000116898.7	0	-	36929538	36930538	0	2	206,500,	0,500,
chr1	36944597	36949379	gencode::CSF3R::ENSG00000119535.13	0	-	36944597	36949379	0	6	434,478,456,480,30,500,	0,522,2023,2543,3782,4282,
chr1	37499226	37500230	gencode::GRIK3::ENSG00000163873.5	0	-	37499226	37500230	0	2	366,500,	0,504,
chr1	37939652	37940652	gencode::ZC3H12A::ENSG00000163874.8	0	+	37939652	37940652	0	2	500,420,	0,580,
chr1	37979870	37980875	gencode::MEAF6::ENSG00000163875.11	0	-	37979870	37980875	0	2	385,500,	0,505,
chr1	38019403	38020403	gencode::SNIP1::ENSG00000163877.9	0	-	38019403	38020403	0	2	201,500,	0,500,
chr1	38022019	38023106	gencode::DNALI1::ENSG00000163879.9	0	+	38022019	38023106	0	2	500,428,	0,659,
chr1	38061022	38062022	gencode::GNL2::ENSG00000134697.8	0	-	38061022	38062022	0	2	335,500,	0,500,
chr1	38099788	38101095	gencode::RSPO1::ENSG00000169218.9	0	-	38099788	38101095	0	2	447,500,	0,807,
chr1	38155676	38156692	gencode::C1orf109::ENSG00000116922.10	0	-	38155676	38156692	0	2	209,500,	0,516,
chr1	38157589	38158574	gencode::CDCA8::ENSG00000134690.6	0	+	38157589	38158574	0	2	500,116,	0,869,
chr1	38218078	38231305	gencode::EPHA10::ENSG00000183317.12	0	-	38218078	38231305	0	6	467,178,342,500,392,500,	0,822,3785,4285,12160,12727,
chr1	38258973	38261659	gencode::MANEAL::ENSG00000185090.10	0	+	38258973	38261659	0	3	500,500,139,	0,1606,2547,
chr1	38272150	38274581	gencode::C1orf122::ENSG00000197982.12	0	+	38272150	38274581	0	2	376,175,	0,2256,
chr1	38293386	38294386	gencode::AL929472.1::ENSG00000230610.1	0	-	38293386	38294386	0	2	484,500,	0,500,
chr1	38324792	38325792	gencode::MTF1::ENSG00000188786.9	0	-	38324792	38325792	0	2	408,500,	0,500,
chr1	38354845	38413229	gencode::INPP5B::ENSG00000204084.8	0	-	38354845	38413229	0	6	381,447,194,397,651,500,	0,553,42882,56679,57163,57884,
chr1	38455159	38457093	gencode::SF3A3::ENSG00000183431.7	0	-	38455159	38457093	0	3	58,270,500,	0,110,1434,
chr1	38470677	38471677	gencode::FHL3::ENSG00000183386.5	0	-	38470677	38471677	0	2	349,500,	0,500,
chr1	38477913	38478950	gencode::UTP11L::ENSG00000183520.7	0	+	38477913	38478950	0	2	500,411,	0,626,
chr1	38512450	38512950	gencode::POU3F1::ENSG00000185668.5	0	-	38512450	38512950	0	1	500,	0,
chr1	39324995	39325995	gencode::RRAGC::ENSG00000116954.7	0	-	39324995	39325995	0	2	84,500,	0,500,
chr1	39342023	39347789	gencode::GJA9::ENSG00000131233.8	0	-	39342023	39347789	0	3	500,316,500,	0,4762,5266,
chr1	39392509	39407971	gencode::RHBDL2::ENSG00000158315.6	0	-	39392509	39407971	0	5	500,379,500,395,500,	0,2176,2676,14447,14962,
chr1	39456394	39457459	gencode::AKIRIN1::ENSG00000174574.11	0	+	39456394	39457459	0	2	500,185,	0,880,
chr1	39491489	39492489	gencode::NDUFS5::ENSG00000168653.6	0	+	39491489	39492489	0	2	500,413,	0,587,
chr1	39546487	39796809	gencode::MACF1::ENSG00000127603.19	0	+	39546487	39796809	0	8	500,371,499,642,226,500,117,500,	0,730,2046,2604,3625,122930,124318,249822,
chr1	39875650	39876150	gencode::KIAA0754::ENSG00000255103.1	0	+	39875650	39876150	0	1	500,	0,
chr1	39956817	39957317	gencode::BMP8A::ENSG00000183682.7	0	+	39956817	39957317	0	1	500,	0,
chr1	40041425	40042923	gencode::PABPC4::ENSG00000090621.9	0	-	40041425	40042923	0	2	3,500,	0,998,
chr1	40098172	40106117	gencode::HEYL::ENSG00000163909.6	0	-	40098172	40106117	0	5	146,192,500,98,500,	0,217,500,6945,7445,
chr1	40137210	40138210	gencode::NT5C1A::ENSG00000116981.3	0	-	40137210	40138210	0	2	363,500,	0,500,
chr1	40156861	40157861	gencode::HPCAL4::ENSG00000116983.8	0	-	40156861	40157861	0	2	114,500,	0,500,
chr1	40204053	40205072	gencode::PPIE::ENSG00000084072.12	0	+	40204053	40205072	0	2	500,467,	0,552,
chr1	40237020	40237520	gencode::OXCT2::ENSG00000198754.5	0	-	40237020	40237520	0	1	500,	0,
chr1	40254533	40255033	gencode::BMP8B::ENSG00000116985.6	0	-	40254533	40255033	0	1	500,	0,
chr1	40348606	40349678	gencode::TRIT1::ENSG00000043514.11	0	-	40348606	40349678	0	2	381,500,	0,572,
chr1	40367687	40368187	gencode::MYCL::ENSG00000116990.9	0	-	40367687	40368187	0	1	500,	0,
chr1	40420301	40421321	gencode::MFSD2A::ENSG00000168389.13	0	+	40420301	40421321	0	2	500,262,	0,758,
chr1	40505404	40506932	gencode::CAP1::ENSG00000131236.12	0	+	40505404	40506932	0	2	500,457,	0,1071,
chr1	40547493	40563875	gencode::PPT1::ENSG00000131238.12	0	-	40547493	40563875	0	4	360,500,360,500,	0,500,14931,15882,
chr1	40626544	40627544	gencode::RLF::ENSG00000117000.8	0	+	40626544	40627544	0	2	500,234,	0,766,
chr1	40713072	40714072	gencode::TMCO2::ENSG00000188800.5	0	+	40713072	40714072	0	2	500,168,	0,832,
chr1	40723278	40724278	gencode::ZMPSTE24::ENSG00000084073.4	0	+	40723278	40724278	0	2	500,210,	0,790,
chr1	40782466	40783466	gencode::COL9A2::ENSG00000049089.9	0	-	40782466	40783466	0	2	326,500,	0,500,
chr1	40862006	40863006	gencode::SMAP2::ENSG00000084070.7	0	+	40862006	40863006	0	2	500,442,	0,558,
chr1	40915278	40916278	gencode::ZFP69B::ENSG00000187801.10	0	+	40915278	40916278	0	2	500,429,	0,571,
chr1	40942386	40943801	gencode::ZFP69::ENSG00000187815.5	0	+	40942386	40943801	0	2	500,233,	0,1182,
chr1	40973912	40974412	gencode::EXO5::ENSG00000164002.7	0	+	40973912	40974412	0	1	500,	0,
chr1	40996732	40997834	gencode::ZNF684::ENSG00000117010.11	0	+	40996732	40997834	0	2	500,373,	0,729,
chr1	41130617	41131829	gencode::RIMS3::ENSG00000117016.5	0	-	41130617	41131829	0	2	446,500,	0,712,
chr1	41156860	41205009	gencode::NFYC::ENSG00000066136.15	0	+	41156860	41205009	0	9	500,143,310,500,424,500,62,496,387,	0,681,1014,17668,18430,43626,44564,47149,47762,
chr1	41249183	41250265	gencode::KCNQ4::ENSG00000117013.10	0	+	41249183	41250265	0	2	500,184,	0,898,
chr1	41328018	41328518	gencode::CITED4::ENSG00000179862.5	0	-	41328018	41328518	0	1	500,	0,
chr1	41444506	41449332	gencode::CTPS1::ENSG00000171793.9	0	+	41444506	41449332	0	6	500,423,500,440,500,202,	0,997,2602,3162,3826,4624,
chr1	41488909	41489409	gencode::SLFNL1::ENSG00000171790.11	0	-	41488909	41489409	0	1	500,	0,
chr1	41625105	41708288	gencode::SCMH1::ENSG00000010803.12	0	-	41625105	41708288	0	8	289,937,461,500,259,500,446,500,	0,502,1467,2048,3084,3584,82177,82683,
chr1	41827093	41828093	gencode::FOXO6::ENSG00000204060.4	0	+	41827093	41828093	0	2	500,75,	0,925,
chr1	41949876	41950842	gencode::EDN2::ENSG00000127129.5	0	-	41949876	41950842	0	2	330,500,	0,466,
chr1	42166172	42384878	gencode::HIVEP3::ENSG00000127124.9	0	-	42166172	42384878	0	4	412,500,412,500,	0,500,217497,218206,
chr1	42618591	42619591	gencode::GUCA2B::ENSG00000044012.3	0	+	42618591	42619591	0	2	500,378,	0,622,
chr1	42629889	42630889	gencode::GUCA2A::ENSG00000197273.3	0	-	42629889	42630889	0	2	417,500,	0,500,
chr1	42655480	42802048	gencode::FOXJ3::ENSG00000198815.4	0	-	42655480	42802048	0	7	500,384,500,457,91,391,500,	0,125150,125650,144656,145156,145423,146068,
chr1	42845976	42846976	gencode::RIMKLA::ENSG00000177181.10	0	+	42845976	42846976	0	2	500,206,	0,794,
chr1	42921287	42921556	gencode::PPCS::ENSG00000127125.7	0	+	42921287	42921556	0	1	269,	0,
chr1	42921438	42921556	gencode::ZMYND12::ENSG00000066185.8	0	-	42921438	42921556	0	1	118,	0,
chr1	42928524	43008959	gencode::CCDC30::ENSG00000186409.10	0	+	42928524	43008959	0	10	500,194,500,197,498,397,489,381,500,456,	0,806,26575,27378,71535,72138,73131,73750,79435,79979,
chr1	43123595	43125087	gencode::PPIH::ENSG00000171960.6	0	+	43123595	43125087	0	4	500,205,6,44,	0,590,986,1448,
chr1	43147597	43148597	gencode::YBX1::ENSG00000065978.13	0	+	43147597	43148597	0	2	500,193,	0,807,
chr1	43205311	43206425	gencode::CLDN19::ENSG00000164007.6	0	-	43205311	43206425	0	2	198,500,	0,614,
chr1	43232755	43233476	gencode::C1orf50::ENSG00000164008.9	0	+	43232755	43233476	0	2	184,179,	0,542,
chr1	43232755	43232939	gencode::LEPRE1::ENSG00000117385.11	0	-	43232755	43232939	0	1	184,	0,
chr1	43281975	43283454	gencode::CCDC23::ENSG00000177868.7	0	-	43281975	43283454	0	4	124,169,326,500,	0,278,500,979,
chr1	43282301	43295585	gencode::ERMAP::ENSG00000164010.9	0	+	43282301	43295585	0	6	121,326,347,500,319,500,	0,174,653,8429,9110,12784,
chr1	43311779	43316618	gencode::ZNF691::ENSG00000164011.13	0	+	43311779	43316618	0	4	500,477,470,202,	0,551,4078,4637,
chr1	43424000	43425030	gencode::SLC2A1::ENSG00000117394.15	0	-	43424000	43425030	0	2	302,500,	0,530,
chr1	43610323	43614122	gencode::FAM183A::ENSG00000186973.6	0	+	43610323	43614122	0	4	500,353,500,365,	0,647,2799,3434,
chr1	43637324	43638400	gencode::WDR65::ENSG00000243710.3	0	+	43637324	43638400	0	3	230,79,159,	0,318,917,
chr1	43637431	43638741	gencode::EBNA1BP2::ENSG00000117395.6	0	-	43637431	43638741	0	4	123,79,159,158,	0,211,810,1152,
chr1	43735164	43736195	gencode::TMEM125::ENSG00000179178.6	0	+	43735164	43736195	0	2	500,437,	0,594,
chr1	43750750	43751788	gencode::C1orf210::ENSG00000253313.1	0	-	43750750	43751788	0	2	362,500,	0,538,
chr1	43766163	43773390	gencode::TIE1::ENSG00000066056.9	0	+	43766163	43773390	0	6	500,440,118,142,154,145,	0,639,6227,6505,6783,7082,
chr1	43802977	43804019	gencode::MPL::ENSG00000117400.10	0	+	43802977	43804019	0	3	500,167,115,	0,623,927,
chr1	43824125	43825158	gencode::CDC20::ENSG00000117399.9	0	+	43824125	43825158	0	3	500,4,89,	0,554,944,
chr1	43833182	43834189	gencode::ELOVL1::ENSG00000066322.8	0	-	43833182	43834189	0	2	401,500,	0,507,
chr1	43854955	43855979	gencode::MED8::ENSG00000159479.12	0	-	43854955	43855979	0	3	472,73,311,	0,524,713,
chr1	43855052	43889296	gencode::SZT2::ENSG00000198198.9	0	+	43855052	43889296	0	6	375,73,471,132,211,307,	0,427,616,33253,33504,33937,
chr1	43918677	43920160	gencode::HYI::ENSG00000178922.12	0	-	43918677	43920160	0	3	377,93,500,	0,493,983,
chr1	43996046	44057480	gencode::PTPRF::ENSG00000142949.12	0	+	43996046	44057480	0	6	500,297,499,361,20,254,	0,717,14154,14793,60574,61180,
chr1	44115328	44116328	gencode::KDM4A::ENSG00000066135.8	0	+	44115328	44116328	0	2	500,403,	0,597,
chr1	44172717	44202433	gencode::ST3GAL3::ENSG00000126091.15	0	+	44172717	44202433	0	4	500,377,468,335,	0,649,28716,29381,
chr1	44398491	44401478	gencode::ARTN::ENSG00000117407.12	0	+	44398491	44401478	0	5	500,222,435,500,88,	0,1068,1443,2039,2899,
chr1	44412110	44431610	gencode::IPO13::ENSG00000117408.6	0	+	44412110	44431610	0	2	500,500,	0,19000,
chr1	44435175	44436196	gencode::DPH2::ENSG00000132768.9	0	+	44435175	44436196	0	2	500,200,	0,821,
chr1	44439819	44442226	gencode::ATP6V0B::ENSG00000117410.9	0	+	44439819	44442226	0	6	500,151,243,204,124,173,	0,1152,1407,1703,2028,2234,
chr1	44444365	44445548	gencode::B4GALT2::ENSG00000117411.12	0	+	44444365	44445548	0	2	500,363,	0,820,
chr1	44456840	44457779	gencode::CCDC24::ENSG00000159214.8	0	+	44456840	44457779	0	2	331,101,	0,838,
chr1	44481728	44497634	gencode::SLC6A9::ENSG00000196517.7	0	-	44481728	44497634	0	5	335,488,500,443,500,	0,500,1269,14804,15406,
chr1	44584021	44585021	gencode::KLF17::ENSG00000171872.4	0	+	44584021	44585021	0	2	500,359,	0,641,
chr1	44678626	44679662	gencode::DMAP1::ENSG00000178028.9	0	+	44678626	44679662	0	2	500,130,	0,906,
chr1	44788215	44821380	gencode::ERI3::ENSG00000117419.10	0	-	44788215	44821380	0	6	179,500,420,500,181,500,	0,500,29884,30384,32165,32665,
chr1	44870365	44890211	gencode::RNF220::ENSG00000187147.13	0	+	44870365	44890211	0	5	500,255,381,500,398,	0,839,6904,18846,19448,
chr1	45139615	45140727	gencode::TMEM53::ENSG00000126106.9	0	-	45139615	45140727	0	3	385,157,180,	0,612,932,
chr1	45139884	45140893	gencode::C1orf228::ENSG00000198520.6	0	+	45139884	45140893	0	3	116,157,346,	0,343,663,
chr1	45204991	45212577	gencode::KIF2C::ENSG00000142945.8	0	+	45204991	45212577	0	4	500,357,500,144,	0,685,6574,7442,
chr1	45240608	45241703	gencode::RPS8::ENSG00000142937.7	0	+	45240608	45241703	0	2	500,429,	0,666,
chr1	45252877	45253877	gencode::BEST4::ENSG00000142959.4	0	-	45252877	45253877	0	3	164,83,500,	0,263,500,
chr1	45265396	45266396	gencode::PLK3::ENSG00000173846.8	0	+	45265396	45266396	0	2	500,49,	0,951,
chr1	45272349	45273457	gencode::TCTEX1D4::ENSG00000188396.2	0	-	45272349	45273457	0	2	104,500,	0,608,
chr1	45273653	45274694	gencode::BTBD19::ENSG00000222009.4	0	+	45273653	45274694	0	2	500,114,	0,927,
chr1	45308116	45309235	gencode::PTCH2::ENSG00000117425.9	0	-	45308116	45309235	0	2	414,500,	0,619,
chr1	45451759	45452782	gencode::EIF2B3::ENSG00000070785.12	0	-	45451759	45452782	0	2	403,500,	0,523,
chr1	45473723	45477501	gencode::HECTD3::ENSG00000126107.10	0	-	45473723	45477501	0	4	186,348,57,500,	0,652,2778,3278,
chr1	45477318	45478318	gencode::UROD::ENSG00000126088.8	0	+	45477318	45478318	0	2	500,359,	0,641,
chr1	45672228	45672728	gencode::ZSWIM5::ENSG00000162415.6	0	-	45672228	45672728	0	1	500,	0,
chr1	45792044	45792544	gencode::HPDL::ENSG00000186603.4	0	+	45792044	45792544	0	1	500,	0,
chr1	45804841	45806227	gencode::TOE1::ENSG00000132773.7	0	+	45804841	45806227	0	2	500,85,	0,1301,
chr1	45805107	45806642	gencode::MUTYH::ENSG00000132781.13	0	-	45805107	45806642	0	2	234,500,	0,1035,
chr1	45922971	45957372	gencode::TESK2::ENSG00000070759.12	0	-	45922971	45957372	0	4	262,426,206,500,	0,574,33344,33901,
chr1	45965117	45966146	gencode::CCDC163P::ENSG00000236624.4	0	-	45965117	45966146	0	3	84,78,59,	0,529,970,
chr1	45965646	45966224	gencode::MMACHC::ENSG00000132763.10	0	+	45965646	45966224	0	2	78,137,	0,441,
chr1	45987026	45988128	gencode::PRDX1::ENSG00000117450.9	0	-	45987026	45988128	0	2	252,500,	0,602,
chr1	46015714	46017239	gencode::AKR1A1::ENSG00000117448.9	0	+	46015714	46017239	0	2	500,410,	0,1115,
chr1	46049216	46050236	gencode::NASP::ENSG00000132780.12	0	+	46049216	46050236	0	2	500,357,	0,663,
chr1	46089139	46090229	gencode::CCDC17::ENSG00000159588.10	0	-	46089139	46090229	0	3	87,79,500,	0,187,590,
chr1	46151708	46152802	gencode::GPBP1L1::ENSG00000159592.6	0	-	46151708	46152802	0	2	373,500,	0,594,
chr1	46152385	46152885	gencode::TMEM69::ENSG00000159596.6	0	+	46152385	46152885	0	1	500,	0,
chr1	46215821	46216821	gencode::IPP::ENSG00000197429.6	0	-	46215821	46216821	0	2	445,500,	0,500,
chr1	46268784	46269784	gencode::MAST2::ENSG00000086015.16	0	+	46268784	46269784	0	2	500,38,	0,962,
chr1	46598314	46642660	gencode::PIK3R3::ENSG00000117461.10	0	-	46598314	46642660	0	4	54,500,237,500,	0,394,43346,43846,
chr1	46640258	46641258	gencode::TSPAN1::ENSG00000117472.5	0	+	46640258	46641258	0	2	500,175,	0,825,
chr1	46662758	46664615	gencode::POMGNT1::ENSG00000085998.9	0	-	46662758	46664615	0	4	219,224,460,500,	0,389,787,1357,
chr1	46668505	46669505	gencode::LURAP1::ENSG00000171357.5	0	+	46668505	46669505	0	2	500,207,	0,793,
chr1	46712866	46713366	gencode::RAD54L::ENSG00000085999.7	0	+	46712866	46713366	0	1	500,	0,
chr1	46768780	46769780	gencode::LRRC41::ENSG00000132128.12	0	-	46768780	46769780	0	3	13,22,286,	0,500,714,
chr1	46769280	46769802	gencode::UQCRH::ENSG00000173660.7	0	+	46769280	46769802	0	2	22,308,	0,214,
chr1	46805348	46807375	gencode::NSUN4::ENSG00000117481.6	0	+	46805348	46807375	0	3	500,282,204,	0,1245,1823,
chr1	46859436	46860436	gencode::FAAH::ENSG00000117480.11	0	+	46859436	46860436	0	2	500,219,	0,781,
chr1	46972167	46973168	gencode::DMBX1::ENSG00000197587.6	0	+	46972167	46973168	0	2	500,330,	0,671,
chr1	47016387	47017699	gencode::KNCN::ENSG00000162456.5	0	-	47016387	47017699	0	2	347,500,	0,812,
chr1	47051143	47083015	gencode::MKNK1::ENSG00000079277.15	0	-	47051143	47083015	0	8	400,500,330,498,468,500,243,452,	0,500,8309,8811,18243,18823,30994,31420,
chr1	47082137	47083063	gencode::MOB3C::ENSG00000142961.10	0	-	47082137	47083063	0	2	243,500,	0,426,
chr1	47131038	47134626	gencode::ATPAF1::ENSG00000123472.8	0	-	47131038	47134626	0	4	278,500,127,500,	0,489,2561,3088,
chr1	47136944	47138049	gencode::TEX38::ENSG00000186118.7	0	+	47136944	47138049	0	2	500,404,	0,701,
chr1	47184824	47185324	gencode::EFCAB14::ENSG00000159658.6	0	-	47184824	47185324	0	1	500,	0,
chr1	47264217	47277244	gencode::CYP4B1::ENSG00000142973.8	0	+	47264217	47277244	0	5	500,318,233,121,386,	0,718,12027,12406,12641,
chr1	47406597	47407637	gencode::CYP4A11::ENSG00000187048.8	0	-	47406597	47407637	0	2	311,500,	0,540,
chr1	47426535	47489739	gencode::CYP4X1::ENSG00000186377.6	0	+	47426535	47489739	0	4	500,105,500,71,	0,895,62204,63133,
chr1	47532659	47533659	gencode::CYP4Z1::ENSG00000186160.4	0	+	47532659	47533659	0	2	500,318,	0,682,
chr1	47602621	47603626	gencode::CYP4A22::ENSG00000162365.7	0	+	47602621	47603626	0	2	500,272,	0,733,
chr1	47655227	47657216	gencode::PDZK1IP1::ENSG00000162366.3	0	-	47655227	47657216	0	3	308,642,500,	0,500,1489,
chr1	47695443	47697887	gencode::TAL1::ENSG00000162367.7	0	-	47695443	47697887	0	3	500,439,500,	0,1444,1944,
chr1	47778307	47780319	gencode::STIL::ENSG00000123473.11	0	-	47778307	47780319	0	4	310,477,393,500,	0,523,1005,1512,
chr1	47798968	47800085	gencode::CMPK1::ENSG00000162368.9	0	+	47798968	47800085	0	2	500,295,	0,822,
chr1	47881243	47881743	gencode::FOXE3::ENSG00000186790.4	0	+	47881243	47881743	0	1	500,	0,
chr1	47901188	47901688	gencode::FOXD2::ENSG00000186564.5	0	+	47901188	47901688	0	1	500,	0,
chr1	48462067	48463067	gencode::TRABD2B::ENSG00000269113.3	0	-	48462067	48463067	0	2	290,500,	0,500,
chr1	48568805	48569305	gencode::AL109659.1::ENSG00000269709.1	0	+	48568805	48569305	0	1	500,	0,
chr1	48687856	48688910	gencode::SLC5A9::ENSG00000117834.8	0	+	48687856	48688910	0	2	500,338,	0,716,
chr1	48937182	48938345	gencode::SPATA6::ENSG00000132122.7	0	-	48937182	48938345	0	2	445,500,	0,663,
chr1	49146074	50490085	gencode::AGBL4::ENSG00000186094.12	0	-	49146074	50490085	0	4	417,500,360,500,	0,500,1342998,1343511,
chr1	49242090	49243090	gencode::BEND5::ENSG00000162373.8	0	-	49242090	49243090	0	2	185,500,	0,500,
chr1	50459489	50459989	gencode::AL645730.2::ENSG00000227839.1	0	+	50459489	50459989	0	1	500,	0,
chr1	50513185	50575877	gencode::ELAVL4::ENSG00000162374.12	0	+	50513185	50575877	0	9	500,329,500,407,500,396,500,425,239,	0,671,55896,56489,58278,58882,60919,61687,62453,
chr1	50887304	50889672	gencode::DMRTA2::ENSG00000142700.7	0	-	50887304	50889672	0	3	500,113,500,	0,1368,1868,
chr1	51077670	51426416	gencode::FAF1::ENSG00000185104.15	0	-	51077670	51426416	0	4	330,500,103,481,	0,500,347663,348265,
chr1	51425935	51435615	gencode::CDKN2C::ENSG00000123080.6	0	+	51425935	51435615	0	3	481,439,42,	0,542,9638,
chr1	51567405	51568442	gencode::C1orf185::ENSG00000204006.4	0	+	51567405	51568442	0	3	500,19,409,	0,518,628,
chr1	51701442	51701942	gencode::RNF11::ENSG00000123091.4	0	+	51701442	51701942	0	1	500,	0,
chr1	51787382	51811288	gencode::TTC39A::ENSG00000085831.11	0	-	51787382	51811288	0	9	8,288,500,363,261,589,500,372,500,	0,117,548,7963,8463,8852,9636,22906,23406,
chr1	51888490	51985500	gencode::EPS15::ENSG00000085832.12	0	-	51888490	51985500	0	4	387,500,455,500,	0,500,95923,96510,
chr1	52042350	52196205	gencode::OSBPL9::ENSG00000117859.14	0	+	52042350	52196205	0	9	500,420,497,385,381,36,234,500,407,	0,580,39696,40545,92372,92836,93138,152629,153448,
chr1	52343191	52344977	gencode::NRD1::ENSG00000078618.15	0	-	52343191	52344977	0	3	461,253,500,	0,500,1286,
chr1	52455936	52456936	gencode::RAB3B::ENSG00000169213.6	0	-	52455936	52456936	0	2	285,500,	0,500,
chr1	52499725	52499988	gencode::KTI12::ENSG00000198841.3	0	-	52499725	52499988	0	1	263,	0,
chr1	52520363	52522343	gencode::TXNDC12::ENSG00000117862.7	0	-	52520363	52522343	0	2	306,290,	0,1690,
chr1	52522053	52522492	gencode::BTF3L4::ENSG00000134717.13	0	+	52522053	52522492	0	1	439,	0,
chr1	52607545	52682551	gencode::ZFYVE9::ENSG00000157077.10	0	+	52607545	52682551	0	4	500,468,487,403,	0,532,74006,74603,
chr1	52831351	52832365	gencode::CC2D1B::ENSG00000154222.10	0	-	52831351	52832365	0	2	387,500,	0,514,
chr1	52869559	52870631	gencode::ORC1::ENSG00000085840.8	0	-	52869559	52870631	0	3	356,104,78,	0,572,994,
chr1	52869735	52870735	gencode::PRPF38A::ENSG00000134748.12	0	+	52869735	52870735	0	3	180,104,182,	0,396,818,
chr1	53018154	53019272	gencode::ZCCHC11::ENSG00000134744.9	0	-	53018154	53019272	0	2	446,500,	0,618,
chr1	53067543	53068543	gencode::GPX7::ENSG00000116157.5	0	+	53067543	53068543	0	2	500,322,	0,678,
chr1	53098515	53099515	gencode::FAM159A::ENSG00000182183.10	0	+	53098515	53099515	0	2	500,166,	0,834,
chr1	53163538	53164538	gencode::SELRC1::ENSG00000162377.4	0	-	53163538	53164538	0	2	352,500,	0,500,
chr1	53191625	53192680	gencode::ZYG11B::ENSG00000162378.8	0	+	53191625	53192680	0	2	500,323,	0,732,
chr1	53307682	53308907	gencode::ZYG11A::ENSG00000203995.5	0	+	53307682	53308907	0	2	500,260,	0,965,
chr1	53386876	53393351	gencode::ECHDC2::ENSG00000121310.12	0	-	53386876	53393351	0	5	346,346,427,49,212,	0,717,5475,5975,6263,
chr1	53392400	53481145	gencode::SCP2::ENSG00000116171.12	0	+	53392400	53481145	0	5	378,49,350,460,428,	0,451,739,87699,88317,
chr1	53527353	53528384	gencode::PODN::ENSG00000174348.9	0	+	53527353	53528384	0	2	500,402,	0,629,
chr1	53607749	53608789	gencode::SLC1A7::ENSG00000162383.7	0	-	53607749	53608789	0	2	235,500,	0,540,
chr1	53661600	53662100	gencode::CPT2::ENSG00000157184.5	0	+	53661600	53662100	0	1	500,	0,
chr1	53685789	53686789	gencode::C1orf123::ENSG00000162384.9	0	-	53685789	53686789	0	3	141,221,500,	0,229,500,
chr1	53703671	53704782	gencode::MAGOH::ENSG00000162385.6	0	-	53703671	53704782	0	2	359,500,	0,611,
chr1	53792666	53794226	gencode::LRP8::ENSG00000157193.10	0	-	53792666	53794226	0	3	261,387,500,	0,405,1060,
chr1	53924571	53925071	gencode::DMRTB1::ENSG00000143006.7	0	+	53924571	53925071	0	1	500,	0,
chr1	54199377	54200377	gencode::GLIS1::ENSG00000174332.3	0	-	54199377	54200377	0	2	197,500,	0,500,
chr1	54303440	54305033	gencode::NDC1::ENSG00000058804.10	0	-	54303440	54305033	0	2	435,500,	0,1093,
chr1	54355138	54356907	gencode::YIPF1::ENSG00000058799.9	0	-	54355138	54356907	0	3	245,768,500,	0,315,1269,
chr1	54359359	54360383	gencode::DIO1::ENSG00000211452.6	0	+	54359359	54360383	0	2	500,161,	0,863,
chr1	54405273	54411749	gencode::HSPB11::ENSG00000081870.7	0	-	54405273	54411749	0	4	382,500,480,147,	0,500,5472,6329,
chr1	54411602	54412525	gencode::LRRC42::ENSG00000116212.10	0	+	54411602	54412525	0	2	147,301,	0,622,
chr1	54483303	54484356	gencode::LDLRAD1::ENSG00000203985.6	0	-	54483303	54484356	0	2	459,500,	0,553,
chr1	54510615	54519677	gencode::TMEM59::ENSG00000116209.7	0	-	54510615	54519677	0	5	500,500,305,96,244,	0,3071,7750,8562,8818,
chr1	54519177	54520306	gencode::TCEANC2::ENSG00000116205.6	0	+	54519177	54520306	0	3	96,373,107,	0,256,1022,
chr1	54569467	54569967	gencode::AL161915.1::ENSG00000212670.1	0	+	54569467	54569967	0	1	500,	0,
chr1	54619443	54619943	gencode::CDCP2::ENSG00000157211.10	0	-	54619443	54619943	0	1	500,	0,
chr1	54637997	54638030	gencode::AL357673.1::ENSG00000248835.2	0	-	54637997	54638030	0	1	33,	0,
chr1	54660766	54665839	gencode::CYB5RL::ENSG00000215883.5	0	-	54660766	54665839	0	5	323,649,500,461,154,	0,624,1401,4419,4919,
chr1	54665339	54666391	gencode::MRPL37::ENSG00000116221.11	0	+	54665339	54666391	0	3	307,154,127,	0,346,925,
chr1	54703209	54703709	gencode::SSBP3-AS1::ENSG00000198711.4	0	+	54703209	54703709	0	1	500,	0,
chr1	54870677	54872592	gencode::SSBP3::ENSG00000157216.11	0	-	54870677	54872592	0	3	442,446,500,	0,500,1415,
chr1	55013400	55014400	gencode::ACOT11::ENSG00000162390.13	0	+	55013400	55014400	0	2	500,383,	0,617,
chr1	55088729	55089729	gencode::FAM151A::ENSG00000162391.7	0	-	55088729	55089729	0	2	219,500,	0,500,
chr1	55106965	55107994	gencode::MROH7::ENSG00000184313.15	0	+	55106965	55107994	0	2	500,351,	0,678,
chr1	55180994	55181994	gencode::TTC4::ENSG00000243725.2	0	+	55180994	55181994	0	2	500,300,	0,700,
chr1	55229687	55230687	gencode::PARS2::ENSG00000162396.5	0	-	55229687	55230687	0	2	444,500,	0,500,
chr1	55266940	55267440	gencode::TTC22::ENSG00000006555.6	0	-	55266940	55267440	0	1	500,	0,
chr1	55271235	55272274	gencode::C1orf177::ENSG00000162398.7	0	+	55271235	55272274	0	2	500,379,	0,660,
chr1	55341168	55353391	gencode::DHCR24::ENSG00000116133.7	0	-	55341168	55353391	0	5	444,446,307,78,500,	0,554,10813,11313,11723,
chr1	55445964	55446964	gencode::TMEM61::ENSG00000143001.4	0	+	55445964	55446964	0	2	500,209,	0,791,
chr1	55464105	55465105	gencode::BSND::ENSG00000162399.6	0	+	55464105	55465105	0	2	500,67,	0,933,
chr1	55504720	55506394	gencode::PCSK9::ENSG00000169174.9	0	+	55504720	55506394	0	3	500,175,316,	0,999,1358,
chr1	55680262	55681286	gencode::USP24::ENSG00000162402.8	0	-	55680262	55681286	0	2	198,500,	0,524,
chr1	57045241	57045741	gencode::PPAP2B::ENSG00000162407.8	0	-	57045241	57045741	0	1	500,	0,
chr1	57110494	57111494	gencode::PRKAA2::ENSG00000162409.6	0	+	57110494	57111494	0	2	500,338,	0,662,
chr1	57284544	57285544	gencode::C1orf168::ENSG00000187889.8	0	-	57284544	57285544	0	2	408,500,	0,500,
chr1	57319978	57320978	gencode::C8A::ENSG00000157131.10	0	+	57319978	57320978	0	2	500,325,	0,675,
chr1	57431188	57432310	gencode::C8B::ENSG00000021852.8	0	-	57431188	57432310	0	2	339,500,	0,622,
chr1	57756237	58716711	gencode::DAB1::ENSG00000173406.11	0	-	57756237	58716711	0	6	396,398,370,500,198,500,	0,603,132992,133492,959474,959974,
chr1	59011952	59012972	gencode::OMA1::ENSG00000162600.7	0	-	59011952	59012972	0	2	420,500,	0,520,
chr1	59043166	59043666	gencode::TACSTD2::ENSG00000184292.5	0	-	59043166	59043666	0	1	500,	0,
chr1	59165264	59166264	gencode::MYSM1::ENSG00000162601.5	0	-	59165264	59166264	0	2	390,500,	0,500,
chr1	59249785	59250285	gencode::JUN::ENSG00000177606.5	0	-	59249785	59250285	0	1	500,	0,
chr1	59762152	60020089	gencode::FGGY::ENSG00000172456.12	0	+	59762152	60020089	0	7	500,338,500,408,500,162,188,	0,672,13106,13698,256937,257479,257749,
chr1	60280032	60282803	gencode::HOOK1::ENSG00000134709.6	0	+	60280032	60282803	0	4	500,178,500,411,	0,822,1771,2360,
chr1	60391962	60392962	gencode::CYP2J2::ENSG00000134716.5	0	-	60391962	60392962	0	2	244,500,	0,500,
chr1	60473913	60539942	gencode::C1orf87::ENSG00000162598.9	0	-	60473913	60539942	0	4	404,500,451,500,	0,500,64995,65529,
chr1	61330430	61870247	gencode::NFIA::ENSG00000162599.11	0	+	61330430	61870247	0	9	500,290,500,143,500,258,433,500,291,	0,710,212015,212872,216603,217291,218062,538817,539526,
chr1	62190305	62191595	gencode::TM2D1::ENSG00000162604.8	0	-	62190305	62191595	0	2	319,500,	0,790,
chr1	62207648	62439539	gencode::INADL::ENSG00000132849.14	0	+	62207648	62439539	0	6	500,419,500,398,500,425,	0,581,209835,210437,230891,231466,
chr1	62660002	62661002	gencode::L1TD1::ENSG00000240563.1	0	+	62660002	62661002	0	2	500,407,	0,593,
chr1	62728596	62785585	gencode::KANK4::ENSG00000132854.14	0	-	62728596	62785585	0	5	165,500,410,302,500,	0,500,9867,55876,56489,
chr1	62901474	62902325	gencode::USP1::ENSG00000162607.8	0	+	62901474	62902325	0	2	500,90,	0,761,
chr1	63062657	63063157	gencode::ANGPTL3::ENSG00000132855.4	0	+	63062657	63063157	0	1	500,	0,
chr1	63072936	63073436	gencode::AL138847.1::ENSG00000269624.1	0	+	63072936	63073436	0	1	500,	0,
chr1	63153453	63154469	gencode::DOCK7::ENSG00000116641.11	0	-	63153453	63154469	0	2	442,500,	0,516,
chr1	63249305	63250305	gencode::ATG4C::ENSG00000125703.10	0	+	63249305	63250305	0	2	500,359,	0,641,
chr1	63788229	63788729	gencode::FOXD3::ENSG00000187140.4	0	+	63788229	63788729	0	1	500,	0,
chr1	63832760	63836940	gencode::ALG6::ENSG00000088035.11	0	+	63832760	63836940	0	4	500,400,499,208,	0,600,3180,3972,
chr1	63988351	63989386	gencode::ITGB3BP::ENSG00000142856.12	0	-	63988351	63989386	0	3	446,174,79,	0,535,956,
chr1	63988560	63989560	gencode::EFCAB7::ENSG00000203965.8	0	+	63988560	63989560	0	3	237,174,253,	0,326,747,
chr1	64014087	64015137	gencode::DLEU2L::ENSG00000116652.5	0	+	64014087	64015137	0	2	500,91,	0,959,
chr1	64058446	64088763	gencode::PGM1::ENSG00000079739.11	0	+	64058446	64088763	0	4	500,72,162,500,	0,961,1371,29817,
chr1	64239192	64590716	gencode::ROR1::ENSG00000185483.7	0	+	64239192	64590716	0	4	500,32,500,375,	0,989,350524,351149,
chr1	64668989	64669989	gencode::UBE2U::ENSG00000177414.9	0	+	64668989	64669989	0	2	500,188,	0,812,
chr1	64935927	64936974	gencode::CACHD1::ENSG00000158966.9	0	+	64935927	64936974	0	2	500,347,	0,700,
chr1	65210277	65244246	gencode::RAVER2::ENSG00000162437.10	0	+	65210277	65244246	0	4	500,171,57,469,	0,829,32969,33500,
chr1	65431687	65432687	gencode::JAK1::ENSG00000162434.7	0	-	65431687	65432687	0	2	326,500,	0,500,
chr1	65612731	65614385	gencode::AK4::ENSG00000162433.10	0	+	65612731	65614385	0	5	500,2,64,143,148,	0,619,717,1011,1506,
chr1	65729923	65775727	gencode::DNAJC6::ENSG00000116675.11	0	+	65729923	65775727	0	4	500,319,500,104,	0,694,44804,45700,
chr1	65885747	66031728	gencode::LEPR::ENSG00000116678.14	0	+	65885747	66031728	0	4	500,477,498,438,	0,678,144981,145543,
chr1	65885769	65886769	gencode::LEPROT::ENSG00000213625.4	0	+	65885769	65886769	0	2	478,344,	0,656,
chr1	66257696	66820064	gencode::PDE4B::ENSG00000184588.13	0	+	66257696	66820064	0	7	500,381,428,456,500,500,500,	0,619,120801,121345,199908,539490,561868,
chr1	66998565	67160376	gencode::SGIP1::ENSG00000118473.17	0	+	66998565	67160376	0	6	500,182,465,411,243,187,	0,527,792,1488,161311,161624,
chr1	67142210	67143210	gencode::AL139147.1::ENSG00000248458.2	0	-	67142210	67143210	0	2	446,429,	0,571,
chr1	67217642	67218642	gencode::TCTEX1D1::ENSG00000152760.5	0	+	67217642	67218642	0	2	500,373,	0,627,
chr1	67266439	67267439	gencode::INSL5::ENSG00000172410.4	0	-	67266439	67267439	0	2	288,500,	0,500,
chr1	67372199	67391070	gencode::WDR78::ENSG00000152763.12	0	-	67372199	67391070	0	5	402,500,319,7,290,	0,500,17824,18371,18581,
chr1	67390077	67396425	gencode::MIER1::ENSG00000198160.10	0	+	67390077	67396425	0	5	265,7,369,500,340,	0,493,703,5348,6008,
chr1	67518230	67520282	gencode::SLC35D1::ENSG00000116704.6	0	-	67518230	67520282	0	5	221,94,500,209,500,	0,312,500,1052,1552,
chr1	67592444	67698035	gencode::C1orf141::ENSG00000203963.7	0	-	67592444	67698035	0	6	402,500,471,500,491,500,	0,500,7695,8195,104591,105091,
chr1	67631582	67673848	gencode::IL23R::ENSG00000162594.10	0	+	67631582	67673848	0	4	500,442,500,465,	0,644,41266,41801,
chr1	67772546	67774136	gencode::IL12RB2::ENSG00000081985.6	0	+	67772546	67774136	0	2	500,484,	0,1106,
chr1	67895555	67896598	gencode::SERBP1::ENSG00000142864.10	0	-	67895555	67896598	0	2	113,500,	0,543,
chr1	68150243	68151383	gencode::GADD45A::ENSG00000116717.7	0	+	68150243	68151383	0	2	500,160,	0,980,
chr1	68298650	68299650	gencode::GNG12::ENSG00000172380.5	0	-	68298650	68299650	0	2	374,500,	0,500,
chr1	68515960	68517814	gencode::DIRAS3::ENSG00000162595.4	0	-	68515960	68517814	0	4	268,81,423,500,	0,523,722,1354,
chr1	68697706	68698766	gencode::WLS::ENSG00000116729.9	0	-	68697706	68698766	0	2	168,500,	0,560,
chr1	68915142	68916142	gencode::RPE65::ENSG00000116745.6	0	-	68915142	68916142	0	2	433,500,	0,500,
chr1	68962297	68963404	gencode::DEPDC1::ENSG00000024526.12	0	-	68962297	68963404	0	2	335,500,	0,607,
chr1	70033580	70226369	gencode::LRRC7::ENSG00000033122.14	0	+	70033580	70226369	0	4	500,306,500,291,	0,746,191777,192498,
chr1	70670803	70671803	gencode::LRRC40::ENSG00000066557.5	0	-	70670803	70671803	0	3	267,61,338,	0,500,662,
chr1	70670864	70696775	gencode::SRSF11::ENSG00000116754.9	0	+	70670864	70696775	0	6	206,61,452,500,120,45,	0,439,601,15780,16660,25866,
chr1	70820417	70820917	gencode::ANKRD13C::ENSG00000118454.8	0	-	70820417	70820917	0	2	70,24,	0,476,
chr1	70820417	70821134	gencode::HHLA3::ENSG00000197568.9	0	+	70820417	70821134	0	2	70,241,	0,476,
chr1	70876400	70877565	gencode::CTH::ENSG00000116761.7	0	+	70876400	70877565	0	2	500,297,	0,868,
chr1	71513491	71513991	gencode::PTGER3::ENSG00000050628.16	0	-	71513491	71513991	0	1	500,	0,
chr1	71546194	71547480	gencode::ZRANB2::ENSG00000132485.8	0	-	71546194	71547480	0	2	426,500,	0,786,
chr1	72566113	72748917	gencode::NEGR1::ENSG00000172260.9	0	-	72566113	72748917	0	4	312,500,328,500,	0,500,181558,182304,
chr1	74648868	74664371	gencode::LRRIQ3::ENSG00000162620.11	0	-	74648868	74664371	0	5	249,498,346,24,259,	0,502,14463,15003,15244,
chr1	74663395	74664450	gencode::FPGT::ENSG00000254685.2	0	+	74663395	74664450	0	3	282,24,338,	0,476,717,
chr1	74663418	74664447	gencode::FPGT-TNNI3K::ENSG00000259030.2	0	+	74663418	74664447	0	3	259,24,335,	0,453,694,
chr1	74663446	74701584	gencode::TNNI3K::ENSG00000116783.10	0	+	74663446	74701584	0	5	231,24,334,500,407,	0,425,666,37138,37731,
chr1	74948533	74978798	gencode::LRRC53::ENSG00000162621.5	0	-	74948533	74978798	0	4	410,472,409,500,	0,528,29265,29765,
chr1	75100039	75139922	gencode::C1orf173::ENSG00000178965.9	0	-	75100039	75139922	0	4	307,500,256,500,	0,500,38883,39383,
chr1	75198202	75199592	gencode::CRYZ::ENSG00000116791.9	0	-	75198202	75199592	0	2	435,488,	0,902,
chr1	75198335	75199430	gencode::TYW3::ENSG00000162623.11	0	+	75198335	75199430	0	2	302,326,	0,769,
chr1	75593618	75601066	gencode::LHX8::ENSG00000162624.10	0	+	75593618	75601066	0	4	500,323,500,425,	0,677,6448,7023,
chr1	75861821	76077301	gencode::SLC44A5::ENSG00000137968.12	0	-	75861821	76077301	0	4	444,500,453,500,	0,500,214448,214980,
chr1	76189535	76190964	gencode::ACADM::ENSG00000117054.9	0	+	76189535	76190964	0	2	500,460,	0,969,
chr1	76251378	76252415	gencode::RABGGTB::ENSG00000137955.11	0	+	76251378	76252415	0	2	500,454,	0,583,
chr1	76262066	76263066	gencode::MSH4::ENSG00000057468.6	0	+	76262066	76263066	0	2	500,150,	0,850,
chr1	76398116	76398616	gencode::ASB17::ENSG00000154007.6	0	-	76398116	76398616	0	1	500,	0,
chr1	76539903	76540903	gencode::ST6GALNAC3::ENSG00000184005.9	0	+	76539903	76540903	0	2	500,332,	0,668,
chr1	77332625	77333625	gencode::ST6GALNAC5::ENSG00000117069.10	0	+	77332625	77333625	0	2	500,248,	0,752,
chr1	77684611	77685615	gencode::PIGK::ENSG00000142892.10	0	-	77684611	77685615	0	2	381,500,	0,504,
chr1	77747235	77998291	gencode::AK5::ENSG00000154027.14	0	+	77747235	77998291	0	4	500,226,500,264,	0,825,250056,250792,
chr1	78147843	78149604	gencode::ZZZ3::ENSG00000036549.8	0	-	78147843	78149604	0	3	424,601,500,	0,500,1261,
chr1	78210647	78226037	gencode::USP33::ENSG00000077254.10	0	-	78210647	78226037	0	4	456,361,288,500,	0,639,14390,14890,
chr1	78244808	78245833	gencode::FAM73A::ENSG00000180488.10	0	+	78244808	78245833	0	2	500,410,	0,615,
chr1	78353699	78354812	gencode::NEXN::ENSG00000162614.14	0	+	78353699	78354812	0	2	500,366,	0,747,
chr1	78444245	78445276	gencode::FUBP1::ENSG00000162613.12	0	-	78444245	78445276	0	2	321,500,	0,531,
chr1	78470037	78471037	gencode::DNAJB4::ENSG00000162616.8	0	+	78470037	78471037	0	2	500,30,	0,970,
chr1	78511085	78512085	gencode::GIPC2::ENSG00000137960.5	0	+	78511085	78512085	0	2	500,65,	0,935,
chr1	78769067	78957256	gencode::PTGFR::ENSG00000122420.5	0	+	78769067	78957256	0	4	500,450,500,333,	0,550,187189,187856,
chr1	79085587	79086629	gencode::IFI44L::ENSG00000137959.11	0	+	79085587	79086629	0	2	500,371,	0,671,
chr1	79115015	79115868	gencode::IFI44::ENSG00000137965.6	0	+	79115015	79115868	0	2	500,276,	0,577,
chr1	79471903	79472903	gencode::ELTD1::ENSG00000162618.8	0	-	79471903	79472903	0	2	412,500,	0,500,
chr1	81771350	82266581	gencode::LPHN2::ENSG00000117114.15	0	+	81771350	82266581	0	6	500,154,500,459,500,382,	0,846,393604,394145,494231,494849,
chr1	84464315	84465315	gencode::TTLL7::ENSG00000137941.12	0	-	84464315	84465315	0	2	296,500,	0,500,
chr1	84543244	84631148	gencode::PRKACB::ENSG00000142875.15	0	+	84543244	84631148	0	7	500,270,500,220,500,270,450,	0,812,66209,66989,86320,86863,87454,
chr1	84763548	84811018	gencode::SAMD13::ENSG00000203943.4	0	+	84763548	84811018	0	11	500,296,500,411,500,634,340,98,243,500,363,	0,704,1192,1781,3240,4151,4827,5237,5424,46470,47107,
chr1	84863714	84874412	gencode::DNASE2B::ENSG00000137976.7	0	+	84863714	84874412	0	4	500,340,500,209,	0,660,9698,10489,
chr1	84944441	84945449	gencode::RPF1::ENSG00000117133.6	0	+	84944441	84945449	0	2	500,255,	0,753,
chr1	84972248	84972748	gencode::GNG5::ENSG00000174021.6	0	-	84972248	84972748	0	1	500,	0,
chr1	85039647	85040647	gencode::CTBS::ENSG00000117151.8	0	-	85039647	85040647	0	2	272,500,	0,500,
chr1	85096931	85101203	gencode::C1orf180::ENSG00000180869.3	0	-	85096931	85101203	0	4	359,500,409,500,	0,500,3272,3772,
chr1	85155472	85156740	gencode::SSX2IP::ENSG00000117155.12	0	-	85155472	85156740	0	2	362,500,	0,768,
chr1	85331842	85359396	gencode::LPAR3::ENSG00000171517.5	0	-	85331842	85359396	0	3	500,300,500,	0,26554,27054,
chr1	85462123	85463295	gencode::MCOLN2::ENSG00000153898.8	0	-	85462123	85463295	0	3	353,65,500,	0,500,672,
chr1	85464329	85528503	gencode::WDR63::ENSG00000162643.8	0	+	85464329	85528503	0	4	500,306,500,332,	0,694,63165,63842,
chr1	85513629	85514653	gencode::MCOLN3::ENSG00000055732.8	0	-	85513629	85514653	0	2	447,500,	0,524,
chr1	85666729	85667229	gencode::SYDE2::ENSG00000097096.8	0	-	85666729	85667229	0	1	500,	0,
chr1	85724816	85725825	gencode::C1orf52::ENSG00000162642.9	0	-	85724816	85725825	0	2	222,500,	0,509,
chr1	85742773	85743273	gencode::BCL10::ENSG00000142867.8	0	-	85742773	85743273	0	1	500,	0,
chr1	85869680	86044433	gencode::DDAH1::ENSG00000153904.14	0	-	85869680	86044433	0	7	381,500,409,156,500,231,500,	0,500,60087,60587,61147,173753,174253,
chr1	86045943	86046943	gencode::CYR61::ENSG00000142871.11	0	+	86045943	86046943	0	2	500,211,	0,789,
chr1	86174116	86174616	gencode::ZNHIT6::ENSG00000117174.6	0	-	86174116	86174616	0	1	500,	0,
chr1	86621621	86622946	gencode::COL24A1::ENSG00000171502.10	0	-	86621621	86622946	0	2	400,500,	0,825,
chr1	86861160	86862523	gencode::ODF2L::ENSG00000122417.11	0	-	86861160	86862523	0	3	465,53,500,	0,500,863,
chr1	86889268	86890268	gencode::CLCA2::ENSG00000137975.7	0	+	86889268	86890268	0	2	500,150,	0,850,
chr1	86933550	86935025	gencode::CLCA1::ENSG00000016490.11	0	+	86933550	86935025	0	3	500,249,207,	0,593,1268,
chr1	87012260	87013425	gencode::CLCA4::ENSG00000016602.8	0	+	87012260	87013425	0	2	500,462,	0,703,
chr1	87169758	87171077	gencode::SH3GLB1::ENSG00000097033.10	0	+	87169758	87171077	0	2	500,421,	0,898,
chr1	87379309	87380330	gencode::SEP15::ENSG00000183291.11	0	-	87379309	87380330	0	2	399,282,	0,739,
chr1	87380048	87459264	gencode::HS2ST1::ENSG00000153936.12	0	+	87380048	87459264	0	4	282,11,427,452,	0,797,78216,78764,
chr1	87458191	87459191	gencode::RP5-1052I5.2::ENSG00000267561.1	0	+	87458191	87459191	0	2	500,379,	0,621,
chr1	87793650	87797693	gencode::LMO4::ENSG00000143013.8	0	+	87793650	87797693	0	3	500,500,194,	0,3200,3849,
chr1	89149404	89247227	gencode::PKN2::ENSG00000065243.14	0	+	89149404	89247227	0	4	500,442,500,381,	0,909,96823,97442,
chr1	89356801	89357801	gencode::GTF2B::ENSG00000137947.7	0	-	89356801	89357801	0	2	362,500,	0,500,
chr1	89457787	89459104	gencode::CCBL2::ENSG00000137944.12	0	-	89457787	89459104	0	2	478,461,	0,856,
chr1	89457955	89459143	gencode::RBMXL1::ENSG00000213516.5	0	-	89457955	89459143	0	2	310,500,	0,688,
chr1	89488065	89489065	gencode::GBP3::ENSG00000117226.7	0	-	89488065	89489065	0	2	299,500,	0,500,
chr1	89530543	89531543	gencode::GBP1::ENSG00000117228.9	0	-	89530543	89531543	0	2	297,500,	0,500,
chr1	89591297	89592297	gencode::GBP2::ENSG00000162645.8	0	-	89591297	89592297	0	2	246,500,	0,500,
chr1	89641223	89642223	gencode::GBP7::ENSG00000213512.1	0	-	89641223	89642223	0	2	378,500,	0,500,
chr1	89664115	89665115	gencode::GBP4::ENSG00000162654.8	0	-	89664115	89665115	0	2	360,500,	0,500,
chr1	89736046	89739044	gencode::GBP5::ENSG00000154451.10	0	-	89736046	89739044	0	4	389,499,88,500,	0,501,1998,2498,
chr1	89829116	89830118	gencode::GBP6::ENSG00000183347.13	0	+	89829116	89830118	0	2	500,430,	0,572,
chr1	89989961	90034299	gencode::LRRC8B::ENSG00000197147.8	0	+	89989961	90034299	0	5	500,378,500,127,245,	0,622,43338,43907,44093,
chr1	90098130	90099130	gencode::LRRC8C::ENSG00000171488.10	0	+	90098130	90099130	0	2	500,247,	0,753,
chr1	90286090	90287979	gencode::LRRC8D::ENSG00000171492.10	0	+	90286090	90287979	0	3	500,627,233,	0,762,1656,
chr1	90460173	90461226	gencode::ZNF326::ENSG00000162664.12	0	+	90460173	90461226	0	2	500,392,	0,661,
chr1	91182794	91183294	gencode::BARHL2::ENSG00000143032.7	0	-	91182794	91183294	0	1	500,	0,
chr1	91486514	91488329	gencode::ZNF644::ENSG00000122482.16	0	-	91486514	91488329	0	3	313,514,500,	0,516,1315,
chr1	91869878	91870926	gencode::HFM1::ENSG00000162669.11	0	-	91869878	91870926	0	2	474,500,	0,548,
chr1	91965907	91967164	gencode::CDC7::ENSG00000097046.8	0	+	91965907	91967164	0	3	500,157,302,	0,600,955,
chr1	92326650	92372392	gencode::TGFBR3::ENSG00000069702.6	0	-	92326650	92372392	0	5	375,447,145,500,500,	0,553,24637,25137,45242,
chr1	92414427	92418218	gencode::BRDT::ENSG00000137948.14	0	+	92414427	92418218	0	4	500,187,500,401,	0,814,2791,3390,
chr1	92495038	92496038	gencode::EPHX4::ENSG00000172031.6	0	+	92495038	92496038	0	2	500,169,	0,831,
chr1	92545361	92546594	gencode::BTBD8::ENSG00000189195.5	0	+	92545361	92546594	0	2	500,315,	0,918,
chr1	92632041	92633108	gencode::KIAA1107::ENSG00000069712.9	0	+	92632041	92633108	0	2	500,409,	0,658,
chr1	92682996	92684088	gencode::C1orf146::ENSG00000203910.4	0	+	92682996	92684088	0	2	500,481,	0,611,
chr1	92764021	92765021	gencode::RPAP2::ENSG00000122484.8	0	+	92764021	92765021	0	2	458,316,	0,684,
chr1	92764033	92765044	gencode::GLMN::ENSG00000174842.12	0	-	92764033	92765044	0	2	446,339,	0,672,
chr1	92949145	92952933	gencode::GFI1::ENSG00000162676.7	0	-	92949145	92952933	0	5	144,500,440,652,500,	0,366,1983,2483,3288,
chr1	93257451	93258461	gencode::EVI5::ENSG00000067208.10	0	-	93257451	93258461	0	2	447,500,	0,510,
chr1	93297081	93298081	gencode::RPL5::ENSG00000122406.8	0	+	93297081	93298081	0	2	500,405,	0,595,
chr1	93426557	93427557	gencode::FAM69A::ENSG00000154511.7	0	-	93426557	93427557	0	2	373,500,	0,500,
chr1	93544291	93545367	gencode::MTF2::ENSG00000143033.13	0	+	93544291	93545367	0	2	500,277,	0,799,
chr1	93644975	93645475	gencode::CCDC18::ENSG00000122483.13	0	+	93644975	93645475	0	1	500,	0,
chr1	93645318	93646785	gencode::TMED5::ENSG00000117500.8	0	-	93645318	93646785	0	2	157,344,	0,1123,
chr1	93810944	93811444	gencode::DR1::ENSG00000117505.8	0	+	93810944	93811444	0	1	500,	0,
chr1	93913187	93914338	gencode::FNBP1L::ENSG00000137942.12	0	+	93913187	93914338	0	2	500,474,	0,677,
chr1	94050192	94313206	gencode::BCAR3::ENSG00000137936.12	0	-	94050192	94313206	0	9	334,500,247,500,234,225,500,417,500,	0,500,28962,29462,96234,96734,97193,262014,262514,
chr1	94344262	94345262	gencode::DNTTIP2::ENSG00000067334.9	0	-	94344262	94345262	0	2	368,500,	0,500,
chr1	94374466	94375466	gencode::GCLM::ENSG00000023909.5	0	-	94374466	94375466	0	2	125,500,	0,500,
chr1	94476681	94587188	gencode::ABCA4::ENSG00000198691.7	0	-	94476681	94587188	0	7	134,194,500,399,500,352,500,	0,262,500,7047,7547,109500,110007,
chr1	94702621	94703689	gencode::ARHGAP29::ENSG00000137962.8	0	-	94702621	94703689	0	2	347,500,	0,568,
chr1	94883432	94884534	gencode::ABCD3::ENSG00000117528.7	0	+	94883432	94884534	0	2	500,388,	0,714,
chr1	95006693	95007856	gencode::F3::ENSG00000117525.9	0	-	95006693	95007856	0	2	397,500,	0,663,
chr1	95285397	95286705	gencode::SLC44A3::ENSG00000143036.12	0	+	95285397	95286705	0	4	500,140,221,91,	0,639,884,1217,
chr1	95390837	95393334	gencode::CNN3::ENSG00000117519.11	0	-	95390837	95393334	0	4	349,500,253,500,	0,500,1301,1997,
chr1	95538001	95539001	gencode::ALG14::ENSG00000172339.9	0	-	95538001	95539001	0	2	315,500,	0,500,
chr1	95582393	95583393	gencode::TMEM56::ENSG00000152078.5	0	+	95582393	95583393	0	2	500,218,	0,782,
chr1	95583175	95583978	gencode::RP11-57H12.6::ENSG00000271092.1	0	+	95583175	95583978	0	2	303,329,	0,474,
chr1	95699210	95700266	gencode::RWDD3::ENSG00000122481.12	0	+	95699210	95700266	0	2	500,393,	0,663,
chr1	96457044	96457544	gencode::RP11-147C23.1::ENSG00000237435.4	0	+	96457044	96457544	0	1	500,	0,
chr1	97186838	97188772	gencode::PTBP2::ENSG00000117569.14	0	+	97186838	97188772	0	3	500,842,417,	0,592,1517,
chr1	98386053	98387105	gencode::DPYD::ENSG00000188641.8	0	-	98386053	98387105	0	2	384,500,	0,552,
chr1	99126735	99127778	gencode::SNX7::ENSG00000162627.12	0	+	99126735	99127778	0	2	500,309,	0,734,
chr1	99469949	99471088	gencode::LPPR5::ENSG00000117598.7	0	-	99469949	99471088	0	2	39,500,	0,639,
chr1	99729008	99764919	gencode::LPPR4::ENSG00000117600.8	0	+	99729008	99764919	0	4	500,118,500,131,	0,1221,34911,35780,
chr1	100110998	100112248	gencode::PALMD::ENSG00000099260.6	0	+	100110998	100112248	0	2	500,328,	0,922,
chr1	100230849	100231849	gencode::FRRS1::ENSG00000156869.8	0	-	100230849	100231849	0	2	1,500,	0,500,
chr1	100315139	100326765	gencode::AGL::ENSG00000162688.11	0	+	100315139	100326765	0	7	500,71,72,348,389,464,500,	0,834,1317,1543,2586,3122,11126,
chr1	100434844	100436592	gencode::SLC35A3::ENSG00000117620.8	0	+	100434844	100436592	0	3	500,372,390,	0,876,1358,
chr1	100503152	100504152	gencode::HIAT1::ENSG00000156875.9	0	+	100503152	100504152	0	2	500,278,	0,722,
chr1	100597944	100599011	gencode::SASS6::ENSG00000156876.8	0	-	100597944	100599011	0	3	359,194,138,	0,567,929,
chr1	100598205	100599270	gencode::TRMT13::ENSG00000122435.5	0	+	100598205	100599270	0	3	98,194,397,	0,306,668,
chr1	100643271	100644271	gencode::LRRC39::ENSG00000122477.8	0	-	100643271	100644271	0	2	417,500,	0,500,
chr1	100714876	100715890	gencode::DBT::ENSG00000137992.10	0	-	100714876	100715890	0	2	447,500,	0,514,
chr1	100731262	100732077	gencode::RTCA::ENSG00000137996.8	0	+	100731262	100732077	0	2	500,99,	0,716,
chr1	100810083	100819004	gencode::CDC14A::ENSG00000079335.13	0	+	100810083	100819004	0	4	500,342,500,443,	0,658,7439,8478,
chr1	101003192	101004192	gencode::GPR88::ENSG00000181656.6	0	+	101003192	101004192	0	2	500,132,	0,868,
chr1	101184797	101185819	gencode::VCAM1::ENSG00000162692.6	0	+	101184797	101185819	0	2	500,337,	0,685,
chr1	101359868	101362054	gencode::EXTL2::ENSG00000162694.9	0	-	101359868	101362054	0	3	318,77,154,	0,1686,2032,
chr1	101361554	101362309	gencode::SLC30A7::ENSG00000162695.7	0	+	101361554	101362309	0	3	77,223,80,	0,346,675,
chr1	101455260	101455618	gencode::AC093157.1::ENSG00000269175.1	0	+	101455260	101455618	0	1	358,	0,
chr1	101460206	101491828	gencode::DPH5::ENSG00000117543.15	0	-	101460206	101491828	0	5	457,499,43,194,500,	0,501,30613,30818,31122,
chr1	101701943	101702943	gencode::S1PR1::ENSG00000170989.8	0	+	101701943	101702943	0	2	500,286,	0,714,
chr1	102302085	102463086	gencode::OLFM3::ENSG00000118733.12	0	-	102302085	102463086	0	6	347,500,369,500,215,500,	0,500,9944,10515,160001,160501,
chr1	103573535	103574552	gencode::COL11A1::ENSG00000060718.14	0	-	103573535	103574552	0	2	91,500,	0,517,
chr1	104067812	104069092	gencode::RNPC3::ENSG00000185946.11	0	+	104067812	104069092	0	2	500,206,	0,1074,
chr1	104159498	104160498	gencode::AMY2A::ENSG00000243480.3	0	+	104159498	104160498	0	2	500,266,	0,734,
chr1	104197876	104198876	gencode::AMY1A::ENSG00000237763.5	0	+	104197876	104198876	0	2	500,324,	0,676,
chr1	104238412	104239576	gencode::AMY1B::ENSG00000174876.12	0	-	104238412	104239576	0	2	249,500,	0,664,
chr1	104292527	104293527	gencode::AMY1C::ENSG00000187733.6	0	+	104292527	104293527	0	2	500,266,	0,734,
chr1	107598766	107599266	gencode::PRMT6::ENSG00000198890.6	0	+	107598766	107599266	0	1	500,	0,
chr1	107682128	107691715	gencode::NTNG1::ENSG00000162631.14	0	+	107682128	107691715	0	4	500,618,396,252,	0,695,1636,9335,
chr1	108230626	108508266	gencode::VAV3::ENSG00000134215.11	0	-	108230626	108508266	0	4	374,500,310,500,	0,500,276349,277140,
chr1	108734940	108743971	gencode::SLC25A24::ENSG00000085491.11	0	-	108734940	108743971	0	3	175,500,500,	0,500,8531,
chr1	108786189	108787189	gencode::NBPF4::ENSG00000196427.9	0	-	108786189	108787189	0	3	14,98,500,	0,231,500,
chr1	108917920	108993408	gencode::NBPF6::ENSG00000186086.12	0	+	108917920	108993408	0	5	500,315,500,98,5,	0,685,74483,75168,75483,
chr1	109102210	109103210	gencode::FAM102B::ENSG00000162636.11	0	+	109102210	109103210	0	2	500,21,	0,979,
chr1	109203177	109204648	gencode::HENMT1::ENSG00000162639.11	0	-	109203177	109204648	0	3	405,59,500,	0,567,971,
chr1	109234444	109234944	gencode::PRPF38B::ENSG00000134186.7	0	+	109234444	109234944	0	1	500,	0,
chr1	109254778	109256566	gencode::FNDC7::ENSG00000143107.4	0	+	109254778	109256566	0	3	500,446,413,	0,842,1375,
chr1	109288809	109289809	gencode::STXBP3::ENSG00000116266.6	0	+	109288809	109289809	0	2	500,399,	0,601,
chr1	109395391	109506606	gencode::AKNAD1::ENSG00000162641.14	0	-	109395391	109506606	0	5	448,342,500,374,495,	0,3815,4325,110215,110720,
chr1	109417471	109420102	gencode::GPSM2::ENSG00000121957.8	0	+	109417471	109420102	0	4	500,465,254,250,	0,535,1631,2381,
chr1	109492560	109506611	gencode::CLCC1::ENSG00000121940.11	0	-	109492560	109506611	0	4	368,498,408,500,	0,512,13012,13551,
chr1	109584108	109585350	gencode::WDR47::ENSG00000085433.11	0	-	109584108	109585350	0	2	373,500,	0,742,
chr1	109618124	109619124	gencode::TAF13::ENSG00000197780.5	0	-	109618124	109619124	0	2	416,500,	0,500,
chr1	109631924	109632424	gencode::TMEM167B::ENSG00000215717.5	0	+	109631924	109632424	0	1	500,	0,
chr1	109654869	109656979	gencode::C1orf194::ENSG00000179902.8	0	-	109654869	109656979	0	5	349,500,273,143,19,	0,508,1110,1610,2091,
chr1	109656122	109657276	gencode::KIAA1324::ENSG00000116299.12	0	+	109656122	109657276	0	3	130,143,316,	0,357,838,
chr1	109756039	109757103	gencode::SARS::ENSG00000031698.8	0	+	109756039	109757103	0	2	500,351,	0,713,
chr1	109792140	109792640	gencode::CELSR2::ENSG00000143126.7	0	+	109792140	109792640	0	1	500,	0,
chr1	109825237	109826308	gencode::PSRC1::ENSG00000134222.12	0	-	109825237	109826308	0	3	62,234,500,	0,176,571,
chr1	109849163	109850163	gencode::MYBPHL::ENSG00000221986.2	0	-	109849163	109850163	0	2	303,500,	0,500,
chr1	109935479	109941073	gencode::SORT1::ENSG00000134243.7	0	-	109935479	109941073	0	4	167,500,133,500,	0,500,4594,5094,
chr1	109968473	109969562	gencode::PSMA5::ENSG00000143106.8	0	-	109968473	109969562	0	2	448,500,	0,589,
chr1	110008679	110009678	gencode::SYPL2::ENSG00000143028.7	0	+	110008679	110009678	0	2	500,157,	0,842,
chr1	110026060	110027060	gencode::ATXN7L2::ENSG00000162650.11	0	+	110026060	110027060	0	2	500,356,	0,644,
chr1	110036173	110037139	gencode::CYB561D1::ENSG00000174151.10	0	+	110036173	110037139	0	2	500,228,	0,738,
chr1	110051804	110052860	gencode::AMIGO1::ENSG00000181754.6	0	-	110051804	110052860	0	2	235,500,	0,556,
chr1	110081993	110082993	gencode::GPR61::ENSG00000156097.8	0	+	110081993	110082993	0	2	500,416,	0,584,
chr1	110090732	110091732	gencode::GNAI3::ENSG00000065135.7	0	+	110090732	110091732	0	2	500,270,	0,730,
chr1	110155179	110156179	gencode::GNAT2::ENSG00000134183.7	0	-	110155179	110156179	0	2	193,500,	0,500,
chr1	110161958	110168719	gencode::AMPD2::ENSG00000116337.11	0	+	110161958	110168719	0	8	500,373,305,500,222,203,162,303,	0,944,1932,3977,4755,5761,6099,6458,
chr1	110198202	110199331	gencode::GSTM4::ENSG00000168765.11	0	+	110198202	110199331	0	2	500,282,	0,847,
chr1	110210143	110211213	gencode::GSTM2::ENSG00000213366.8	0	+	110210143	110211213	0	3	500,269,89,	0,632,981,
chr1	110229941	110230979	gencode::GSTM1::ENSG00000134184.8	0	+	110229941	110230979	0	3	500,256,110,	0,592,928,
chr1	110254363	110255237	gencode::GSTM5::ENSG00000134201.6	0	+	110254363	110255237	0	2	500,265,	0,609,
chr1	110282638	110284884	gencode::GSTM3::ENSG00000134202.6	0	-	110282638	110284884	0	4	221,434,635,500,	0,500,1022,1746,
chr1	110306026	110307149	gencode::EPS8L3::ENSG00000198758.6	0	-	110306026	110307149	0	2	415,500,	0,623,
chr1	110452732	110454107	gencode::CSF1::ENSG00000184371.9	0	+	110452732	110454107	0	2	500,421,	0,954,
chr1	110526807	110547254	gencode::AHCYL1::ENSG00000168710.13	0	+	110526807	110547254	0	4	500,11,500,179,	0,989,19445,20268,
chr1	110573698	110577740	gencode::STRIP1::ENSG00000143093.10	0	+	110573698	110577740	0	4	500,434,500,299,	0,566,3039,3743,
chr1	110612822	110613822	gencode::ALX3::ENSG00000156150.6	0	-	110612822	110613822	0	2	133,500,	0,500,
chr1	110654561	110655061	gencode::UBL4B::ENSG00000186150.3	0	+	110654561	110655061	0	1	500,	0,
chr1	110692607	110693607	gencode::SLC6A17::ENSG00000197106.6	0	+	110692607	110693607	0	2	500,100,	0,900,
chr1	110753594	110754094	gencode::KCNC4::ENSG00000116396.9	0	+	110753594	110754094	0	1	500,	0,
chr1	110880627	110881127	gencode::RBM15::ENSG00000162775.10	0	+	110880627	110881127	0	1	500,	0,
chr1	110933148	110934204	gencode::SLC16A4::ENSG00000168679.13	0	-	110933148	110934204	0	2	336,500,	0,556,
chr1	110948547	110951064	gencode::LAMTOR5::ENSG00000134248.9	0	-	110948547	110951064	0	3	390,500,500,	0,500,2017,
chr1	110993321	110994321	gencode::PROK1::ENSG00000143125.5	0	+	110993321	110994321	0	2	500,409,	0,591,
chr1	111061797	111062297	gencode::KCNA10::ENSG00000143105.5	0	-	111061797	111062297	0	1	500,	0,
chr1	111147845	111174596	gencode::KCNA2::ENSG00000177301.9	0	-	111147845	111174596	0	7	165,501,500,319,500,418,500,	0,501,1130,1706,2206,25751,26251,
chr1	111217655	111218155	gencode::KCNA3::ENSG00000177272.7	0	-	111217655	111218155	0	1	500,	0,
chr1	111415274	111416275	gencode::CD53::ENSG00000143119.8	0	+	111415274	111416275	0	2	500,403,	0,598,
chr1	111495583	111507201	gencode::LRIF1::ENSG00000121931.11	0	-	111495583	111507201	0	3	500,153,500,	0,10504,11118,
chr1	111681748	111683347	gencode::CEPT1::ENSG00000134255.9	0	+	111681748	111683347	0	3	372,9,416,	0,1090,1183,
chr1	111682838	111683338	gencode::DRAM2::ENSG00000156171.10	0	-	111682838	111683338	0	2	9,407,	0,93,
chr1	111742811	111747531	gencode::DENND2D::ENSG00000162777.12	0	-	111742811	111747531	0	4	201,81,384,500,	0,500,3720,4220,
chr1	111742892	111772941	gencode::CHI3L2::ENSG00000064886.9	0	+	111742892	111772941	0	6	120,81,500,387,500,436,	0,419,26839,27501,28921,29613,
chr1	111832983	111853598	gencode::CHIA::ENSG00000134216.14	0	+	111832983	111853598	0	4	500,463,500,482,	0,591,19512,20133,
chr1	111888409	111889741	gencode::PIFO::ENSG00000173947.9	0	+	111888409	111889741	0	3	500,234,68,	0,886,1264,
chr1	111969634	111970899	gencode::OVGP1::ENSG00000085465.11	0	-	111969634	111970899	0	3	47,182,500,	0,500,765,
chr1	111991057	111992605	gencode::ATP5F1::ENSG00000116459.6	0	+	111991057	111992605	0	4	181,129,251,108,	0,371,1148,1440,
chr1	111991428	111992498	gencode::WDR77::ENSG00000116455.9	0	-	111991428	111992498	0	3	129,251,1,	0,777,1069,
chr1	112015913	112016990	gencode::C1orf162::ENSG00000143110.7	0	+	112015913	112016990	0	2	500,336,	0,741,
chr1	112045610	112107084	gencode::ADORA3::ENSG00000121933.13	0	-	112045610	112107084	0	4	14,500,381,500,	0,772,60474,60974,
chr1	112084339	112163268	gencode::RAP1A::ENSG00000116473.10	0	+	112084339	112163268	0	5	500,206,500,210,297,	0,794,77565,78219,78632,
chr1	112281485	112298946	gencode::FAM212B::ENSG00000197852.8	0	-	112281485	112298946	0	3	320,500,97,	0,561,17364,
chr1	112297426	112303325	gencode::DDX20::ENSG00000064703.7	0	+	112297426	112303325	0	4	500,171,500,113,	0,1423,5092,5786,
chr1	112525422	112532277	gencode::KCND3::ENSG00000171385.5	0	-	112525422	112532277	0	3	496,90,500,	0,5855,6355,
chr1	112938302	112939302	gencode::CTTNBP2NL::ENSG00000143079.10	0	+	112938302	112939302	0	2	500,406,	0,594,
chr1	113008662	113051399	gencode::WNT2B::ENSG00000134245.13	0	+	113008662	113051399	0	3	500,340,500,	0,1553,42237,
chr1	113160339	113162540	gencode::ST7L::ENSG00000007341.14	0	-	113160339	113162540	0	3	287,564,33,	0,500,2168,
chr1	113161294	113161403	gencode::CAPZA1::ENSG00000116489.8	0	+	113161294	113161403	0	1	109,	0,
chr1	113216542	113217866	gencode::MOV10::ENSG00000155363.14	0	+	113216542	113217866	0	3	500,13,193,	0,811,1131,
chr1	113249178	113250556	gencode::RHOC::ENSG00000155366.12	0	-	113249178	113250556	0	2	173,500,	0,878,
chr1	113253477	113254477	gencode::RP11-426L16.10::ENSG00000271810.1	0	-	113253477	113254477	0	3	150,190,469,	0,218,531,
chr1	113255093	113258599	gencode::PPM1J::ENSG00000155367.11	0	-	113255093	113258599	0	3	270,438,500,	0,562,3006,
chr1	113262540	113263698	gencode::FAM19A3::ENSG00000184599.9	0	+	113262540	113263698	0	2	500,440,	0,718,
chr1	113498975	113499475	gencode::SLC16A1::ENSG00000155380.7	0	-	113498975	113499475	0	1	500,	0,
chr1	113615330	113616330	gencode::LRIG2::ENSG00000198799.7	0	+	113615330	113616330	0	2	500,61,	0,939,
chr1	113932870	113934110	gencode::MAGI3::ENSG00000081026.14	0	+	113932870	113934110	0	2	500,137,	0,1103,
chr1	114301003	114302598	gencode::PHTF1::ENSG00000116793.11	0	-	114301003	114302598	0	2	275,500,	0,1095,
chr1	114355098	114355598	gencode::RSBN1::ENSG00000081019.9	0	-	114355098	114355598	0	1	500,	0,
chr1	114413820	114414881	gencode::PTPN22::ENSG00000134242.11	0	-	114413820	114414881	0	2	336,500,	0,561,
chr1	114429497	114430669	gencode::BCL2L15::ENSG00000188761.7	0	-	114429497	114430669	0	2	371,500,	0,672,
chr1	114446950	114447762	gencode::AP4B1::ENSG00000134262.8	0	-	114446950	114447762	0	2	274,70,	0,742,
chr1	114447692	114447762	gencode::DCLRE1B::ENSG00000118655.4	0	+	114447692	114447762	0	1	70,	0,
chr1	114471313	114497747	gencode::HIPK1::ENSG00000163349.17	0	+	114471313	114497747	0	8	500,175,417,500,350,500,689,353,	0,843,1250,21953,22603,24685,25243,26081,
chr1	114521562	114522951	gencode::OLFML3::ENSG00000116774.7	0	+	114521562	114522951	0	3	500,340,201,	0,692,1188,
chr1	114694562	114697041	gencode::SYT6::ENSG00000134207.10	0	-	114694562	114697041	0	4	275,180,690,500,	0,500,977,1979,
chr1	115005548	115054281	gencode::TRIM33::ENSG00000197323.6	0	-	115005548	115054281	0	4	175,171,368,500,	0,312,632,48233,
chr1	115123760	115124760	gencode::BCAS2::ENSG00000116752.5	0	-	115123760	115124760	0	3	157,103,500,	0,254,500,
chr1	115212156	115213232	gencode::DENND2C::ENSG00000175984.10	0	-	115212156	115213232	0	2	445,500,	0,576,
chr1	115237707	115238739	gencode::AMPD1::ENSG00000116748.15	0	-	115237707	115238739	0	2	361,500,	0,532,
chr1	115259015	115259533	gencode::NRAS::ENSG00000213281.4	0	-	115259015	115259533	0	2	261,18,	0,500,
chr1	115292311	115301148	gencode::CSDE1::ENSG00000009307.11	0	-	115292311	115301148	0	4	128,481,458,500,	0,519,7774,8337,
chr1	115322838	115323806	gencode::SIKE1::ENSG00000052723.7	0	-	115322838	115323806	0	2	217,500,	0,468,
chr1	115396923	115398253	gencode::SYCP1::ENSG00000198765.7	0	+	115396923	115398253	0	4	500,112,155,58,	0,718,981,1272,
chr1	115571914	115576483	gencode::TSHB::ENSG00000134200.2	0	+	115571914	115576483	0	4	500,431,497,336,	0,569,3569,4233,
chr1	115631553	115632621	gencode::TSPAN2::ENSG00000134198.5	0	-	115631553	115632621	0	2	429,500,	0,568,
chr1	115880357	115881357	gencode::NGF::ENSG00000134259.3	0	-	115880357	115881357	0	2	465,500,	0,500,
chr1	116184073	116194522	gencode::VANGL1::ENSG00000173218.10	0	+	116184073	116194522	0	5	500,540,420,373,415,	0,636,1256,9449,10034,
chr1	116310835	116311902	gencode::CASQ2::ENSG00000118729.10	0	-	116310835	116311902	0	2	91,500,	0,567,
chr1	116386538	116387038	gencode::NHLH2::ENSG00000177551.5	0	-	116386538	116387038	0	1	500,	0,
chr1	116518618	116519734	gencode::SLC22A15::ENSG00000163393.8	0	+	116518618	116519734	0	2	500,397,	0,719,
chr1	116653875	116654875	gencode::MAB21L3::ENSG00000173212.4	0	+	116653875	116654875	0	2	500,442,	0,558,
chr1	116915381	116926491	gencode::ATP1A1::ENSG00000163399.11	0	+	116915381	116926491	0	5	500,340,123,500,314,	0,767,1484,10110,10796,
chr1	116926218	116927218	gencode::AL136376.1::ENSG00000269279.1	0	-	116926218	116927218	0	2	413,470,	0,530,
chr1	117113148	117114161	gencode::CD58::ENSG00000116815.11	0	-	117113148	117114161	0	2	374,500,	0,513,
chr1	117208553	117210875	gencode::IGSF3::ENSG00000143061.13	0	-	117208553	117210875	0	3	350,423,500,	0,1261,1822,
chr1	117236233	117237233	gencode::C1orf137::ENSG00000203864.1	0	+	117236233	117237233	0	2	500,412,	0,588,
chr1	117296506	117297250	gencode::CD2::ENSG00000116824.4	0	+	117296506	117297250	0	2	500,73,	0,671,
chr1	117452178	117453178	gencode::PTGFRN::ENSG00000134247.9	0	+	117452178	117453178	0	2	500,302,	0,698,
chr1	117543881	117544933	gencode::CD101::ENSG00000134256.8	0	+	117543881	117544933	0	2	500,449,	0,603,
chr1	117602424	117603424	gencode::TTF2::ENSG00000116830.7	0	+	117602424	117603424	0	3	500,76,243,	0,574,757,
chr1	117664384	117665709	gencode::TRIM45::ENSG00000134253.5	0	-	117664384	117665709	0	2	34,500,	0,825,
chr1	117715388	117754056	gencode::VTCN1::ENSG00000134258.12	0	-	117715388	117754056	0	6	418,500,279,500,394,500,	0,500,30570,31070,37661,38168,
chr1	117909570	117910070	gencode::MAN1A2::ENSG00000198162.8	0	+	117909570	117910070	0	1	500,	0,
chr1	118148055	118149055	gencode::FAM46C::ENSG00000183508.4	0	+	118148055	118149055	0	2	500,278,	0,722,
chr1	118471706	118472753	gencode::GDAP2::ENSG00000196505.6	0	-	118471706	118472753	0	3	362,89,346,	0,547,701,
chr1	118471842	118472890	gencode::WDR3::ENSG00000065183.11	0	+	118471842	118472890	0	3	226,89,483,	0,411,565,
chr1	118727346	118728346	gencode::SPAG17::ENSG00000155761.9	0	-	118727346	118728346	0	2	345,500,	0,500,
chr1	119529928	119532679	gencode::TBX15::ENSG00000092607.9	0	-	119529928	119532679	0	4	283,500,296,500,	0,500,1751,2251,
chr1	119682447	119683794	gencode::WARS2::ENSG00000116874.7	0	-	119682447	119683794	0	3	441,228,500,	0,500,847,
chr1	119910931	119911960	gencode::HAO2::ENSG00000116882.10	0	+	119910931	119911960	0	2	500,433,	0,596,
chr1	119957053	119958206	gencode::HSD3B2::ENSG00000203859.5	0	+	119957053	119958206	0	3	500,124,20,	0,774,1133,
chr1	120049325	120050440	gencode::HSD3B1::ENSG00000203857.5	0	+	120049325	120050440	0	3	500,53,194,	0,562,921,
chr1	120189896	120190896	gencode::ZNF697::ENSG00000143067.4	0	-	120189896	120190896	0	2	415,500,	0,500,
chr1	120254009	120262249	gencode::PHGDH::ENSG00000092621.7	0	+	120254009	120262249	0	3	500,224,500,	0,776,7740,
chr1	120311017	120312028	gencode::HMGCS2::ENSG00000134240.7	0	-	120311017	120312028	0	2	344,500,	0,511,
chr1	120350928	120354783	gencode::REG4::ENSG00000134193.10	0	-	120350928	120354783	0	5	395,161,101,326,500,	0,560,899,2775,3355,
chr1	120439118	120439618	gencode::ADAM30::ENSG00000134249.6	0	-	120439118	120439618	0	1	500,	0,
chr1	120596339	120612740	gencode::NOTCH2::ENSG00000134250.13	0	-	120596339	120612740	0	4	392,500,205,500,	0,500,15401,15901,
chr1	120838504	120839004	gencode::FAM72B::ENSG00000188610.8	0	+	120838504	120839004	0	1	500,	0,
chr1	120935394	120936437	gencode::FCGR1B::ENSG00000198019.8	0	-	120935394	120936437	0	3	51,391,500,	0,76,543,
chr1	143767881	143768381	gencode::PPIAL4G::ENSG00000236334.1	0	-	143767881	143768381	0	1	500,	0,
chr1	143913143	143913643	gencode::FAM72D::ENSG00000215784.4	0	-	143913143	143913643	0	1	500,	0,
chr1	144146307	144220626	gencode::NBPF8::ENSG00000162825.12	0	+	144146307	144220626	0	10	500,284,460,293,500,387,500,460,500,445,	0,716,4749,5419,26354,26967,68579,69119,73319,73874,
chr1	144339237	144339737	gencode::AL592284.1::ENSG00000231360.2	0	+	144339237	144339737	0	1	500,	0,
chr1	144364246	144364746	gencode::PPIAL4B::ENSG00000255854.1	0	-	144364246	144364746	0	1	500,	0,
chr1	144811243	144812442	gencode::NBPF9::ENSG00000168614.13	0	+	144811243	144812442	0	2	500,483,	0,716,
chr1	144932552	145076686	gencode::PDE4DIP::ENSG00000178104.15	0	-	144932552	145076686	0	7	500,248,500,316,500,226,500,	0,61788,62470,106719,107450,142849,143634,
chr1	144988808	144989308	gencode::AL590452.1::ENSG00000268172.1	0	+	144988808	144989308	0	1	500,	0,
chr1	145208618	145225098	gencode::NOTCH2NL::ENSG00000213240.7	0	+	145208618	145225098	0	4	500,180,500,394,	0,820,15480,16086,
chr1	145289271	145293870	gencode::NBPF10::ENSG00000163386.16	0	+	145289271	145293870	0	5	500,363,500,98,288,	0,637,3342,3999,4311,
chr1	145412594	145413778	gencode::HFE2::ENSG00000168509.13	0	+	145412594	145413778	0	2	500,350,	0,834,
chr1	145437968	145438468	gencode::TXNIP::ENSG00000117289.7	0	+	145437968	145438468	0	1	500,	0,
chr1	145469887	145470507	gencode::POLR3GL::ENSG00000121851.8	0	-	145469887	145470507	0	2	432,120,	0,500,
chr1	145470007	145471007	gencode::ANKRD34A::ENSG00000181039.7	0	+	145470007	145471007	0	3	312,120,99,	0,380,901,
chr1	145476584	145477584	gencode::LIX1L::ENSG00000152022.7	0	+	145476584	145477584	0	2	500,132,	0,868,
chr1	145507097	145508132	gencode::RBM8A::ENSG00000131795.8	0	+	145507097	145508132	0	3	500,278,55,	0,638,980,
chr1	145515751	145517059	gencode::PEX11B::ENSG00000131779.6	0	+	145515751	145517059	0	3	500,101,400,	0,707,908,
chr1	145524390	145525534	gencode::ITGA10::ENSG00000143127.8	0	+	145524390	145525534	0	2	500,415,	0,729,
chr1	145548729	145549743	gencode::ANKRD35::ENSG00000198483.8	0	+	145548729	145549743	0	2	500,386,	0,628,
chr1	145574789	145576523	gencode::PIAS3::ENSG00000131788.11	0	+	145574789	145576523	0	3	500,582,419,	0,617,1315,
chr1	145589057	145589939	gencode::NUDT17::ENSG00000186364.7	0	-	145589057	145589939	0	2	176,500,	0,382,
chr1	145610384	145611437	gencode::POLR3C::ENSG00000186141.4	0	-	145610384	145611437	0	3	357,98,94,	0,553,959,
chr1	145610535	145611535	gencode::RNF115::ENSG00000121848.9	0	+	145610535	145611535	0	3	206,98,192,	0,402,808,
chr1	145706361	145716114	gencode::CD160::ENSG00000117281.11	0	-	145706361	145716114	0	4	322,500,458,500,	0,500,8704,9253,
chr1	145727223	145743762	gencode::PDZK1::ENSG00000174827.9	0	+	145727223	145743762	0	4	500,473,500,427,	0,528,15539,16112,
chr1	145825950	145827603	gencode::GPR89A::ENSG00000117262.14	0	-	145825950	145827603	0	3	435,435,500,	0,500,1153,
chr1	145883367	145884367	gencode::GPR89C::ENSG00000196644.8	0	+	145883367	145884367	0	2	500,367,	0,633,
chr1	146040468	146083265	gencode::NBPF11::ENSG00000152042.13	0	-	146040468	146083265	0	8	419,413,302,479,467,491,27,500,	0,587,13526,14047,27216,27786,41665,42297,
chr1	146373045	146456995	gencode::NBPF12::ENSG00000186275.7	0	+	146373045	146456995	0	19	500,172,229,491,406,491,290,493,330,500,439,472,351,361,462,372,451,361,462,	0,709,1281,10975,11569,31050,31760,46478,47148,66418,66979,68634,69283,73425,73963,78179,78728,82950,83488,
chr1	146643546	146644623	gencode::PRKAB2::ENSG00000131791.6	0	-	146643546	146644623	0	3	19,257,500,	0,202,577,
chr1	146696401	146697730	gencode::FMO5::ENSG00000131781.8	0	-	146696401	146697730	0	2	83,500,	0,829,
chr1	146713790	146714855	gencode::CHD1L::ENSG00000131778.13	0	+	146713790	146714855	0	2	500,373,	0,692,
chr1	147012681	147013681	gencode::BCL9::ENSG00000116128.5	0	+	147012681	147013681	0	2	500,235,	0,765,
chr1	147141864	147143118	gencode::ACP6::ENSG00000162836.7	0	-	147141864	147143118	0	2	85,500,	0,754,
chr1	147232185	147245984	gencode::GJA5::ENSG00000143140.6	0	-	147232185	147245984	0	4	419,500,369,500,	0,500,12799,13299,
chr1	147374445	147380069	gencode::GJA8::ENSG00000121634.4	0	+	147374445	147380069	0	3	500,456,487,	0,544,5137,
chr1	147400005	147401005	gencode::GPR89B::ENSG00000188092.10	0	+	147400005	147401005	0	2	500,312,	0,688,
chr1	147599049	147610581	gencode::NBPF24::ENSG00000203836.7	0	-	147599049	147610581	0	5	60,98,476,406,500,	0,274,524,10532,11032,
chr1	147631928	147632928	gencode::BX842679.1::ENSG00000269647.1	0	-	147631928	147632928	0	2	38,500,	0,500,
chr1	147955419	147955919	gencode::PPIAL4A::ENSG00000255963.1	0	-	147955419	147955919	0	1	500,	0,
chr1	148025348	148026348	gencode::NBPF14::ENSG00000122497.13	0	-	148025348	148026348	0	2	410,500,	0,500,
chr1	148202536	148203036	gencode::PPIAL4D::ENSG00000256374.1	0	-	148202536	148203036	0	1	500,	0,
chr1	148346429	148347551	gencode::NBPF20::ENSG00000203832.6	0	-	148346429	148347551	0	2	150,500,	0,622,
chr1	148560342	148561489	gencode::NBPF15::ENSG00000243452.3	0	+	148560342	148561489	0	2	500,372,	0,775,
chr1	148738942	148739942	gencode::NBPF16::ENSG00000203827.7	0	+	148738942	148739942	0	3	500,98,31,	0,657,969,
chr1	149400042	149401042	gencode::HIST2H3PS2::ENSG00000203818.6	0	-	149400042	149401042	0	2	88,500,	0,500,
chr1	149459049	149460049	gencode::FAM72C::ENSG00000203817.5	0	-	149459049	149460049	0	2	373,500,	0,500,
chr1	149552502	149553002	gencode::PPIAL4C::ENSG00000198161.5	0	+	149552502	149553002	0	1	500,	0,
chr1	149675477	149675977	gencode::AL358813.2::ENSG00000203815.2	0	+	149675477	149675977	0	1	500,	0,
chr1	149753745	149754244	gencode::FCGR1A::ENSG00000150337.9	0	+	149753745	149754244	0	1	499,	0,
chr1	149783928	149784428	gencode::HIST2H2BF::ENSG00000203814.5	0	-	149783928	149784428	0	1	500,	0,
chr1	149784736	149785736	gencode::HIST2H3D::ENSG00000183598.3	0	-	149784736	149785736	0	2	89,500,	0,500,
chr1	149803726	149804226	gencode::HIST2H4A::ENSG00000183941.8	0	+	149803726	149804226	0	1	500,	0,
chr1	149812765	149813265	gencode::HIST2H3C::ENSG00000203811.1	0	-	149812765	149813265	0	1	500,	0,
chr1	149814478	149814978	gencode::HIST2H2AA3::ENSG00000183558.5	0	-	149814478	149814978	0	1	500,	0,
chr1	149822142	149822642	gencode::HIST2H2AA4::ENSG00000203812.2	0	+	149822142	149822642	0	1	500,	0,
chr1	149823680	149824180	gencode::HIST2H3A::ENSG00000203852.3	0	+	149823680	149824180	0	1	500,	0,
chr1	149832714	149833214	gencode::HIST2H4B::ENSG00000182217.7	0	-	149832714	149833214	0	1	500,	0,
chr1	149858232	149859018	gencode::HIST2H2AC::ENSG00000184260.4	0	+	149858232	149859018	0	2	292,57,	0,729,
chr1	149858232	149858524	gencode::HIST2H2BE::ENSG00000184678.8	0	-	149858232	149858524	0	1	292,	0,
chr1	149858961	149871393	gencode::BOLA1::ENSG00000178096.8	0	+	149858961	149871393	0	4	57,264,361,108,	0,714,11688,12324,
chr1	149858966	149859966	gencode::HIST2H2AB::ENSG00000184270.3	0	-	149858966	149859966	0	2	52,291,	0,709,
chr1	149888893	149889934	gencode::SV2A::ENSG00000159164.5	0	-	149888893	149889934	0	2	395,500,	0,541,
chr1	149900236	149900543	gencode::SF3B4::ENSG00000143368.9	0	-	149900236	149900543	0	1	307,	0,
chr1	149907743	149909291	gencode::MTMR11::ENSG00000014914.15	0	-	149907743	149909291	0	3	301,229,500,	0,500,1048,
chr1	149982125	149983125	gencode::OTUD7B::ENSG00000163113.10	0	-	149982125	149983125	0	2	269,500,	0,500,
chr1	150038868	150040363	gencode::VPS45::ENSG00000136631.8	0	+	150038868	150040363	0	2	500,354,	0,1141,
chr1	150120872	150122669	gencode::PLEKHO1::ENSG00000023902.9	0	+	150120872	150122669	0	3	500,129,190,	0,1106,1607,
chr1	150206526	150209004	gencode::ANP32E::ENSG00000143401.10	0	-	150206526	150209004	0	4	398,500,275,500,	0,500,1277,1978,
chr1	150229053	150229553	gencode::CA14::ENSG00000118298.6	0	+	150229053	150229553	0	1	500,	0,
chr1	150240099	150245682	gencode::C1orf54::ENSG00000118292.4	0	+	150240099	150245682	0	6	14,163,70,83,283,414,	0,92,430,4502,4719,5169,
chr1	150241703	150242203	gencode::APH1A::ENSG00000117362.8	0	-	150241703	150242203	0	1	500,	0,
chr1	150254452	150255228	gencode::C1orf51::ENSG00000159208.11	0	+	150254452	150255228	0	2	500,198,	0,578,
chr1	150265788	150266339	gencode::MRPS21::ENSG00000187145.10	0	+	150265788	150266339	0	2	500,19,	0,532,
chr1	150293424	150294501	gencode::PRPF3::ENSG00000117360.8	0	+	150293424	150294501	0	2	500,458,	0,619,
chr1	150336625	150337686	gencode::RPRD2::ENSG00000163125.11	0	+	150336625	150337686	0	2	500,289,	0,772,
chr1	150459386	150460331	gencode::TARS2::ENSG00000143374.10	0	+	150459386	150460331	0	2	500,337,	0,608,
chr1	150480078	150481082	gencode::ECM1::ENSG00000143369.10	0	+	150480078	150481082	0	2	473,325,	0,679,
chr1	150521383	150525016	gencode::ADAMTSL4::ENSG00000143382.9	0	+	150521383	150525016	0	5	500,318,60,196,230,	0,594,1371,2984,3403,
chr1	150521396	150522295	gencode::AL356356.1::ENSG00000225996.2	0	+	150521396	150522295	0	2	487,318,	0,581,
chr1	150533469	150534469	gencode::ADAMTSL4-AS1::ENSG00000203804.3	0	-	150533469	150534469	0	2	10,500,	0,500,
chr1	150552066	150552566	gencode::MCL1::ENSG00000143384.8	0	-	150552066	150552566	0	1	500,	0,
chr1	150601092	150602572	gencode::ENSA::ENSG00000143420.13	0	-	150601092	150602572	0	3	442,271,500,	0,524,980,
chr1	150669000	150670130	gencode::GOLPH3L::ENSG00000143457.6	0	-	150669000	150670130	0	2	465,500,	0,630,
chr1	150692852	150693861	gencode::HORMAD1::ENSG00000143452.11	0	-	150692852	150693861	0	2	425,500,	0,509,
chr1	150737768	150738933	gencode::CTSS::ENSG00000163131.6	0	-	150737768	150738933	0	2	403,500,	0,665,
chr1	150780299	150781299	gencode::CTSK::ENSG00000143387.8	0	-	150780299	150781299	0	2	388,500,	0,500,
chr1	150848555	150849744	gencode::ARNT::ENSG00000143437.16	0	-	150848555	150849744	0	2	461,500,	0,689,
chr1	150898314	150899399	gencode::SETDB1::ENSG00000143379.8	0	+	150898314	150899399	0	2	500,404,	0,681,
chr1	150941088	150947979	gencode::CERS2::ENSG00000143418.15	0	-	150941088	150947979	0	4	303,479,152,500,	0,521,5852,6391,
chr1	150953992	150954960	gencode::ANXA9::ENSG00000143412.5	0	+	150953992	150954960	0	2	500,103,	0,865,
chr1	150978461	150981351	gencode::FAM63A::ENSG00000143409.11	0	-	150978461	150981351	0	7	113,60,500,380,101,174,20,	0,264,872,1880,2390,2688,2870,
chr1	150980452	150997717	gencode::PRUNE::ENSG00000143363.11	0	+	150980452	150997717	0	6	269,101,174,174,367,444,	0,399,697,879,16265,16821,
chr1	151008545	151009590	gencode::BNIPL::ENSG00000163141.14	0	+	151008545	151009590	0	2	500,346,	0,699,
chr1	151020076	151020215	gencode::C1orf56::ENSG00000143443.9	0	+	151020076	151020215	0	1	139,	0,
chr1	151029733	151030233	gencode::MLLT11::ENSG00000213190.2	0	+	151029733	151030233	0	1	500,	0,
chr1	151042301	151043079	gencode::CDC42SE1::ENSG00000197622.8	0	-	151042301	151043079	0	2	436,278,	0,500,
chr1	151042579	151061133	gencode::GABPB2::ENSG00000143458.7	0	+	151042579	151061133	0	5	158,278,167,500,358,	0,222,833,17554,18196,
chr1	151119087	151119587	gencode::SEMA6C::ENSG00000143434.11	0	-	151119087	151119587	0	1	500,	0,
chr1	151128604	151129604	gencode::TNFAIP8L2::ENSG00000163154.5	0	+	151128604	151129604	0	2	500,404,	0,596,
chr1	151138424	151138924	gencode::LYSMD1::ENSG00000163155.7	0	-	151138424	151138924	0	2	93,243,	0,257,
chr1	151138424	151138944	gencode::SCNM1::ENSG00000163156.7	0	+	151138424	151138944	0	2	93,263,	0,257,
chr1	151147957	151148937	gencode::TMOD4::ENSG00000163157.10	0	-	151147957	151148937	0	2	440,480,	0,500,
chr1	151162134	151163134	gencode::VPS72::ENSG00000163159.7	0	-	151162134	151163134	0	2	344,500,	0,500,
chr1	151170527	151207420	gencode::PIP5K1A::ENSG00000143398.15	0	+	151170527	151207420	0	3	500,250,446,	0,35893,36447,
chr1	151226678	151227684	gencode::PSMD4::ENSG00000159352.11	0	+	151226678	151227684	0	2	500,398,	0,608,
chr1	151253905	151254905	gencode::RP11-126K1.2::ENSG00000232671.2	0	-	151253905	151254905	0	3	111,385,32,	0,500,968,
chr1	151254405	151255290	gencode::ZNF687::ENSG00000143373.13	0	+	151254405	151255290	0	2	385,417,	0,468,
chr1	151298224	151300691	gencode::PI4KB::ENSG00000143393.12	0	-	151298224	151300691	0	4	421,373,357,500,	0,627,1163,1967,
chr1	151319227	151320333	gencode::RFX5::ENSG00000143390.13	0	-	151319227	151320333	0	2	457,500,	0,606,
chr1	151344676	151345709	gencode::SELENBP1::ENSG00000143416.16	0	-	151344676	151345709	0	2	435,500,	0,533,
chr1	151371509	151372454	gencode::PSMB4::ENSG00000159377.6	0	+	151371509	151372454	0	2	500,249,	0,696,
chr1	151414180	151432441	gencode::POGZ::ENSG00000143442.17	0	-	151414180	151432441	0	4	374,497,470,500,	0,503,16975,17761,
chr1	151483372	151484372	gencode::CGN::ENSG00000143375.10	0	+	151483372	151484372	0	2	500,379,	0,621,
chr1	151512280	151513284	gencode::TUFT1::ENSG00000143367.11	0	+	151512280	151513284	0	2	500,380,	0,624,
chr1	151584057	151611831	gencode::SNX27::ENSG00000143376.8	0	+	151584057	151611831	0	4	500,67,500,234,	0,933,26774,27540,
chr1	151679886	151689790	gencode::CELF3::ENSG00000159409.10	0	-	151679886	151689790	0	5	94,139,473,321,500,	0,240,527,8142,9404,
chr1	151682408	151682908	gencode::AL589765.1::ENSG00000240510.2	0	+	151682408	151682908	0	1	500,	0,
chr1	151682408	151694512	gencode::RIIAD1::ENSG00000178796.8	0	+	151682408	151694512	0	3	500,500,414,	0,11104,11690,
chr1	151734978	151739630	gencode::OAZ3::ENSG00000143450.10	0	+	151734978	151739630	0	4	466,155,10,264,	0,667,1065,4388,
chr1	151735645	151736053	gencode::MRPL9::ENSG00000143436.6	0	-	151735645	151736053	0	2	155,10,	0,398,
chr1	151762406	151764392	gencode::TDRKH::ENSG00000182134.11	0	-	151762406	151764392	0	3	447,285,500,	0,592,1486,
chr1	151798067	151804848	gencode::RORC::ENSG00000143365.12	0	-	151798067	151804848	0	4	336,500,472,500,	0,500,5659,6281,
chr1	151812533	151813533	gencode::C2CD4D::ENSG00000225556.1	0	-	151812533	151813533	0	2	143,500,	0,500,
chr1	151825673	151826673	gencode::THEM5::ENSG00000196407.7	0	-	151825673	151826673	0	2	243,500,	0,500,
chr1	151881613	151882784	gencode::THEM4::ENSG00000159445.8	0	-	151881613	151882784	0	2	220,500,	0,671,
chr1	151964554	151967366	gencode::S100A10::ENSG00000197747.4	0	-	151964554	151967366	0	3	442,500,500,	0,500,2312,
chr1	152009011	152010011	gencode::S100A11::ENSG00000163191.5	0	-	152009011	152010011	0	2	375,500,	0,500,
chr1	152061040	152062040	gencode::TCHHL1::ENSG00000182898.3	0	-	152061040	152062040	0	2	453,500,	0,500,
chr1	152086056	152087056	gencode::TCHH::ENSG00000159450.8	0	-	152086056	152087056	0	2	360,500,	0,500,
chr1	152131204	152132204	gencode::RPTN::ENSG00000215853.3	0	-	152131204	152132204	0	2	453,500,	0,500,
chr1	152196169	152197169	gencode::HRNR::ENSG00000197915.5	0	-	152196169	152197169	0	2	447,500,	0,500,
chr1	152297179	152298179	gencode::FLG::ENSG00000143631.10	0	-	152297179	152298179	0	2	483,500,	0,500,
chr1	152331982	152332982	gencode::FLG2::ENSG00000143520.6	0	-	152331982	152332982	0	2	447,500,	0,500,
chr1	152386239	152387239	gencode::CRNN::ENSG00000143536.7	0	-	152386239	152387239	0	2	448,500,	0,500,
chr1	152482819	152483819	gencode::LCE5A::ENSG00000186207.4	0	+	152482819	152483819	0	2	500,343,	0,657,
chr1	152486477	152487477	gencode::CRCT1::ENSG00000169509.5	0	+	152486477	152487477	0	2	500,447,	0,553,
chr1	152538748	152539748	gencode::LCE3E::ENSG00000185966.3	0	-	152538748	152539748	0	2	463,500,	0,500,
chr1	152552480	152553480	gencode::LCE3D::ENSG00000163202.4	0	-	152552480	152553480	0	2	462,500,	0,500,
chr1	152572637	152573637	gencode::LCE3C::ENSG00000244057.2	0	+	152572637	152573637	0	2	500,75,	0,925,
chr1	152585786	152586786	gencode::LCE3B::ENSG00000187238.5	0	+	152585786	152586786	0	2	500,212,	0,788,
chr1	152595079	152596079	gencode::LCE3A::ENSG00000185962.1	0	-	152595079	152596079	0	2	230,500,	0,500,
chr1	152635371	152636371	gencode::LCE2D::ENSG00000187223.3	0	+	152635371	152636371	0	2	500,464,	0,536,
chr1	152647270	152659098	gencode::LCE2B::ENSG00000159455.7	0	+	152647270	152659098	0	4	500,464,500,464,	0,536,10828,11364,
chr1	152647270	152648270	gencode::LCE2C::ENSG00000187180.3	0	+	152647270	152648270	0	2	500,464,	0,536,
chr1	152670339	152671339	gencode::LCE2A::ENSG00000187173.3	0	+	152670339	152671339	0	2	500,467,	0,533,
chr1	152680135	152682022	gencode::LCE4A::ENSG00000187170.4	0	+	152680135	152682022	0	3	500,650,55,	0,737,1832,
chr1	152691497	152691997	gencode::C1orf68::ENSG00000198854.4	0	+	152691497	152691997	0	1	500,	0,
chr1	152730005	152732034	gencode::KPRP::ENSG00000203786.5	0	+	152730005	152732034	0	3	500,468,498,	0,532,1531,
chr1	152748347	152748847	gencode::LCE1F::ENSG00000240386.2	0	+	152748347	152748847	0	1	500,	0,
chr1	152758189	152759252	gencode::LCE1E::ENSG00000186226.7	0	+	152758189	152759252	0	2	500,411,	0,652,
chr1	152768726	152769726	gencode::LCE1D::ENSG00000172155.7	0	+	152768726	152769726	0	2	500,477,	0,523,
chr1	152777976	152779607	gencode::LCE1C::ENSG00000197084.4	0	-	152777976	152779607	0	3	478,467,500,	0,631,1131,
chr1	152783946	152784446	gencode::LCE1B::ENSG00000196734.6	0	+	152783946	152784446	0	1	500,	0,
chr1	152799448	152799948	gencode::LCE1A::ENSG00000186844.4	0	+	152799448	152799948	0	1	500,	0,
chr1	152814843	152815843	gencode::LCE6A::ENSG00000235942.2	0	+	152814843	152815843	0	2	500,354,	0,646,
chr1	152850292	152851292	gencode::SMCP::ENSG00000163206.5	0	+	152850292	152851292	0	2	500,368,	0,632,
chr1	152880520	152881522	gencode::IVL::ENSG00000163207.5	0	+	152880520	152881522	0	2	500,455,	0,547,
chr1	152942641	152943641	gencode::SPRR4::ENSG00000184148.3	0	+	152942641	152943641	0	2	500,469,	0,531,
chr1	152956056	152957685	gencode::SPRR1A::ENSG00000169474.3	0	+	152956056	152957685	0	3	500,453,479,	0,547,1150,
chr1	152973722	152975475	gencode::SPRR3::ENSG00000163209.10	0	+	152973722	152975475	0	4	500,475,80,311,	0,549,1274,1442,
chr1	153003177	153004800	gencode::SPRR1B::ENSG00000169469.7	0	+	153003177	153004800	0	3	500,452,479,	0,548,1144,
chr1	153013094	153014907	gencode::SPRR2D::ENSG00000163216.6	0	-	153013094	153014907	0	4	46,294,549,500,	0,163,500,1313,
chr1	153029513	153030513	gencode::SPRR2A::ENSG00000241794.1	0	-	153029513	153030513	0	2	431,500,	0,500,
chr1	153043336	153114427	gencode::SPRR2B::ENSG00000196805.6	0	-	153043336	153114427	0	4	702,500,473,500,	0,748,70091,70591,
chr1	153066501	153079160	gencode::SPRR2E::ENSG00000203785.4	0	-	153066501	153079160	0	4	456,500,442,500,	0,500,11659,12159,
chr1	153085491	153086491	gencode::SPRR2F::ENSG00000244094.1	0	-	153085491	153086491	0	2	456,500,	0,500,
chr1	153122845	153123845	gencode::SPRR2G::ENSG00000159516.8	0	-	153122845	153123845	0	2	480,500,	0,500,
chr1	153175418	153176418	gencode::LELP1::ENSG00000203784.2	0	+	153175418	153176418	0	2	500,409,	0,591,
chr1	153189559	153190559	gencode::PRR9::ENSG00000203783.4	0	+	153189559	153190559	0	2	500,462,	0,538,
chr1	153231675	153232675	gencode::LOR::ENSG00000203782.5	0	+	153231675	153232675	0	2	500,464,	0,536,
chr1	153282694	153283694	gencode::PGLYRP3::ENSG00000159527.3	0	-	153282694	153283694	0	2	390,500,	0,500,
chr1	153320522	153321816	gencode::PGLYRP4::ENSG00000163218.10	0	-	153320522	153321816	0	2	479,500,	0,794,
chr1	153329829	153330742	gencode::S100A9::ENSG00000163220.10	0	+	153329829	153330742	0	2	500,383,	0,530,
chr1	153347625	153348625	gencode::S100A12::ENSG00000163221.7	0	-	153347625	153348625	0	2	400,500,	0,500,
chr1	153363035	153364164	gencode::S100A8::ENSG00000143546.5	0	-	153363035	153364164	0	3	295,62,500,	0,417,629,
chr1	153388499	153390919	gencode::S100A7A::ENSG00000184330.7	0	+	153388499	153390919	0	4	500,657,663,218,	0,542,1257,2202,
chr1	153411925	153412925	gencode::S100A7L2::ENSG00000197364.6	0	-	153411925	153412925	0	2	482,500,	0,500,
chr1	153431850	153433677	gencode::S100A7::ENSG00000143556.4	0	-	153431850	153433677	0	3	441,731,500,	0,500,1327,
chr1	153508191	153509220	gencode::S100A6::ENSG00000197956.5	0	-	153508191	153509220	0	3	71,11,500,	0,220,529,
chr1	153512683	153514741	gencode::S100A5::ENSG00000196420.3	0	-	153512683	153514741	0	5	411,500,117,109,500,	0,487,1058,1266,1558,
chr1	153517039	153523112	gencode::S100A4::ENSG00000196154.7	0	-	153517039	153523112	0	7	88,144,404,230,500,426,500,	0,248,500,957,1322,5073,5573,
chr1	153521102	153522348	gencode::S100A3::ENSG00000188015.5	0	-	153521102	153522348	0	3	399,52,500,	0,500,746,
chr1	153536709	153540866	gencode::S100A2::ENSG00000196754.6	0	-	153536709	153540866	0	6	500,461,834,500,451,500,	0,809,1632,2522,3157,3657,
chr1	153580298	153586059	gencode::S100A16::ENSG00000188643.6	0	-	153580298	153586059	0	7	174,92,500,59,500,366,500,	0,357,500,1015,1522,4761,5261,
chr1	153587914	153589962	gencode::S100A14::ENSG00000189334.4	0	-	153587914	153589962	0	5	388,292,3,493,500,	0,500,851,919,1548,
chr1	153599024	153607068	gencode::S100A13::ENSG00000189171.9	0	-	153599024	153607068	0	8	400,88,212,325,157,241,363,247,	0,500,720,1052,1691,1950,7044,7797,
chr1	153599901	153601397	gencode::S100A1::ENSG00000160678.7	0	+	153599901	153601397	0	4	55,325,157,423,	0,175,814,1073,
chr1	153606024	153611317	gencode::CHTOP::ENSG00000160679.8	0	+	153606024	153611317	0	6	407,234,481,433,500,391,	0,797,2540,3107,4035,4902,
chr1	153630629	153631611	gencode::SNAPIN::ENSG00000143553.6	0	+	153630629	153631611	0	2	500,247,	0,735,
chr1	153642958	153644024	gencode::ILF2::ENSG00000143621.12	0	-	153642958	153644024	0	2	433,500,	0,566,
chr1	153650612	153651112	gencode::NPR1::ENSG00000169418.9	0	+	153650612	153651112	0	1	500,	0,
chr1	153700042	153723829	gencode::INTS3::ENSG00000143624.9	0	+	153700042	153723829	0	3	500,500,112,	0,22787,23675,
chr1	153746555	153746829	gencode::SLC27A3::ENSG00000143554.9	0	+	153746555	153746829	0	1	274,	0,
chr1	153894951	153895951	gencode::GATAD2B::ENSG00000143614.7	0	-	153894951	153895951	0	2	255,500,	0,500,
chr1	153918672	153919672	gencode::DENND4B::ENSG00000198837.5	0	-	153918672	153919672	0	2	102,500,	0,500,
chr1	153930552	153931574	gencode::CRTC2::ENSG00000160741.12	0	-	153930552	153931574	0	2	266,473,	0,549,
chr1	153935951	153940688	gencode::SLC39A1::ENSG00000143570.13	0	-	153935951	153940688	0	6	17,22,367,171,157,26,	0,97,230,3737,4237,4711,
chr1	153939845	153941218	gencode::CREB3L4::ENSG00000143578.11	0	+	153939845	153941218	0	5	14,157,50,207,41,	0,343,817,943,1332,
chr1	153949614	153950664	gencode::JTB::ENSG00000143543.10	0	-	153949614	153950664	0	2	29,500,	0,550,
chr1	153958328	153959328	gencode::RAB13::ENSG00000143545.4	0	-	153958328	153959328	0	2	258,500,	0,500,
chr1	153962734	153963588	gencode::RPS27::ENSG00000177954.7	0	+	153962734	153963588	0	2	500,308,	0,546,
chr1	154028842	154127783	gencode::NUP210L::ENSG00000143552.5	0	-	154028842	154127783	0	4	446,417,223,191,	0,583,98250,98750,
chr1	154150159	154165187	gencode::TPM3::ENSG00000143549.15	0	-	154150159	154165187	0	6	428,500,366,500,341,500,	0,500,4936,5525,13875,14528,
chr1	154178309	154179181	gencode::C1orf189::ENSG00000163263.6	0	-	154178309	154179181	0	2	439,372,	0,500,
chr1	154192154	154198057	gencode::UBAP2L::ENSG00000143569.14	0	+	154192154	154198057	0	7	155,239,93,220,438,500,366,	0,261,568,950,1299,4903,5537,
chr1	154192509	154193604	gencode::C1orf43::ENSG00000143612.14	0	-	154192509	154193604	0	4	145,93,220,151,	0,213,595,944,
chr1	154244486	154245643	gencode::HAX1::ENSG00000143575.10	0	+	154244486	154245643	0	2	500,389,	0,768,
chr1	154293091	154294095	gencode::AQP10::ENSG00000143595.8	0	+	154293091	154294095	0	2	500,357,	0,647,
chr1	154297801	154301774	gencode::ATP8B2::ENSG00000143515.12	0	+	154297801	154301774	0	6	227,348,500,239,624,221,	0,379,1974,2538,2849,3752,
chr1	154377168	154378198	gencode::IL6R::ENSG00000160712.8	0	+	154377168	154378198	0	2	500,6,	0,1024,
chr1	154474589	154474694	gencode::SHE::ENSG00000169291.5	0	-	154474589	154474694	0	1	105,	0,
chr1	154474589	154475947	gencode::TDRD10::ENSG00000163239.8	0	+	154474589	154475947	0	2	105,440,	0,918,
chr1	154530609	154531609	gencode::UBE2Q1::ENSG00000160714.5	0	-	154530609	154531609	0	2	91,500,	0,500,
chr1	154539756	154540756	gencode::CHRNB2::ENSG00000160716.4	0	+	154539756	154540756	0	2	500,170,	0,830,
chr1	154580182	154600974	gencode::ADAR::ENSG00000160710.11	0	-	154580182	154600974	0	4	283,500,388,500,	0,500,19758,20292,
chr1	154584566	154585566	gencode::AL606500.1::ENSG00000268141.1	0	+	154584566	154585566	0	3	500,99,376,	0,516,624,
chr1	154831819	154843256	gencode::KCNN3::ENSG00000143603.14	0	-	154831819	154843256	0	5	349,500,127,500,500,	0,500,8476,8976,10937,
chr1	154908967	154909967	gencode::PMVK::ENSG00000163344.5	0	-	154908967	154909967	0	2	97,500,	0,500,
chr1	154928080	154929097	gencode::PBXIP1::ENSG00000163346.12	0	-	154928080	154929097	0	2	462,500,	0,517,
chr1	154933724	154934773	gencode::PYGO2::ENSG00000163348.3	0	-	154933724	154934773	0	3	223,137,261,	0,500,788,
chr1	154942502	154947128	gencode::SHC1::ENSG00000160691.14	0	-	154942502	154947128	0	4	3,500,369,276,	0,721,3850,4350,
chr1	154946628	154947674	gencode::CKS1B::ENSG00000173207.8	0	+	154946628	154947674	0	3	93,276,284,	0,224,762,
chr1	154955327	154961516	gencode::FLAD1::ENSG00000160688.14	0	+	154955327	154961516	0	2	500,28,	0,6161,
chr1	154965587	154966063	gencode::LENEP::ENSG00000163352.5	0	+	154965587	154966063	0	1	476,	0,
chr1	154974626	154986923	gencode::ZBTB7B::ENSG00000160685.9	0	+	154974626	154986923	0	5	500,130,373,65,352,	0,538,795,11797,11945,
chr1	155005742	155006757	gencode::DCST2::ENSG00000163354.10	0	-	155005742	155006757	0	4	165,42,113,182,	0,515,590,833,
chr1	155005799	155006908	gencode::DCST1::ENSG00000163357.6	0	+	155005799	155006908	0	4	108,42,113,333,	0,458,533,776,
chr1	155023406	155024327	gencode::ADAM15::ENSG00000143537.9	0	+	155023406	155024327	0	2	355,384,	0,537,
chr1	155035706	155036736	gencode::EFNA4::ENSG00000243364.3	0	+	155035706	155036736	0	2	500,322,	0,708,
chr1	155035723	155051884	gencode::EFNA3::ENSG00000143590.9	0	+	155035723	155051884	0	4	483,309,500,337,	0,691,15124,15824,
chr1	155035723	155036723	gencode::EFNA3::ENSG00000251246.1	0	+	155035723	155036723	0	2	483,309,	0,691,
chr1	155099435	155100851	gencode::EFNA1::ENSG00000169242.7	0	+	155099435	155100851	0	2	500,304,	0,1112,
chr1	155107333	155108772	gencode::SLC50A1::ENSG00000169241.13	0	+	155107333	155108772	0	3	486,167,303,	0,825,1136,
chr1	155112883	155113571	gencode::DPM3::ENSG00000179085.7	0	-	155112883	155113571	0	2	81,500,	0,188,
chr1	155145370	155146309	gencode::KRTCAP2::ENSG00000163463.7	0	-	155145370	155146309	0	2	324,348,	0,591,
chr1	155145372	155146942	gencode::TRIM46::ENSG00000163462.13	0	+	155145372	155146942	0	3	322,392,425,	0,589,1145,
chr1	155159369	155160195	gencode::RP11-201K10.3::ENSG00000273088.1	0	-	155159369	155160195	0	3	329,76,141,	0,483,685,
chr1	155162158	155163206	gencode::MUC1::ENSG00000185499.12	0	-	155162158	155163206	0	2	416,500,	0,548,
chr1	155171362	155178208	gencode::THBS3::ENSG00000169231.9	0	-	155171362	155178208	0	5	383,142,95,398,500,	0,545,832,5826,6346,
chr1	155177989	155179537	gencode::MTX1::ENSG00000173171.10	0	+	155177989	155179537	0	2	500,412,	0,1136,
chr1	155210517	155214990	gencode::GBA::ENSG00000177628.11	0	-	155210517	155214990	0	4	357,500,333,500,	0,549,3444,3973,
chr1	155224251	155225678	gencode::FAM189B::ENSG00000160767.16	0	-	155224251	155225678	0	2	190,500,	0,927,
chr1	155231550	155232658	gencode::SCAMP3::ENSG00000116521.6	0	-	155231550	155232658	0	2	324,437,	0,671,
chr1	155242578	155248001	gencode::CLK2::ENSG00000176444.14	0	-	155242578	155248001	0	4	411,500,325,340,	0,729,4423,5083,
chr1	155246873	155247873	gencode::HCN3::ENSG00000143630.5	0	+	155246873	155247873	0	2	453,212,	0,788,
chr1	155270292	155271725	gencode::PKLR::ENSG00000143627.13	0	-	155270292	155271725	0	3	377,292,500,	0,500,933,
chr1	155278038	155279206	gencode::FDPS::ENSG00000160752.10	0	+	155278038	155279206	0	2	500,337,	0,831,
chr1	155290186	155294867	gencode::RUSC1::ENSG00000160753.11	0	+	155290186	155294867	0	5	11,229,433,500,131,	0,271,598,3041,4550,
chr1	155531823	155533098	gencode::ASH1L::ENSG00000116539.6	0	-	155531823	155533098	0	3	118,83,500,	0,661,775,
chr1	155579478	155580531	gencode::MSTO1::ENSG00000125459.10	0	+	155579478	155580531	0	3	500,88,178,	0,647,875,
chr1	155645962	155659291	gencode::YY1AP1::ENSG00000163374.15	0	-	155645962	155659291	0	7	374,423,172,83,153,57,255,	0,577,11623,12402,12603,12829,13074,
chr1	155657257	155659384	gencode::DAP3::ENSG00000132676.11	0	+	155657257	155659384	0	5	500,83,153,57,348,	0,1107,1308,1534,1779,
chr1	155826472	155829691	gencode::GON4L::ENSG00000116580.14	0	-	155826472	155829691	0	5	475,500,401,108,103,	0,614,2219,2719,3116,
chr1	155828799	155829846	gencode::SYT11::ENSG00000132718.7	0	+	155828799	155829846	0	3	293,108,258,	0,392,789,
chr1	155880206	155881695	gencode::RIT1::ENSG00000143622.6	0	-	155880206	155881695	0	5	32,145,69,325,500,	0,93,391,500,989,
chr1	155903664	155904690	gencode::KIAA0907::ENSG00000132680.6	0	-	155903664	155904690	0	2	460,500,	0,526,
chr1	155910979	155911479	gencode::RXFP4::ENSG00000173080.4	0	+	155910979	155911479	0	1	500,	0,
chr1	155941611	155960364	gencode::ARHGEF2::ENSG00000116584.13	0	-	155941611	155960364	0	7	432,500,404,202,500,415,500,	0,500,5840,6340,6707,17753,18253,
chr1	155990180	155991250	gencode::SSR2::ENSG00000163479.9	0	-	155990180	155991250	0	2	335,500,	0,570,
chr1	156023085	156024085	gencode::UBQLN4::ENSG00000160803.7	0	-	156023085	156024085	0	2	297,500,	0,500,
chr1	156024042	156025051	gencode::LAMTOR2::ENSG00000116586.7	0	+	156024042	156025051	0	2	500,301,	0,708,
chr1	156030450	156031450	gencode::RAB25::ENSG00000132698.9	0	+	156030450	156031450	0	2	500,214,	0,786,
chr1	156051289	156052289	gencode::MEX3A::ENSG00000254726.2	0	-	156051289	156052289	0	2	44,500,	0,500,
chr1	156051868	156097093	gencode::LMNA::ENSG00000160789.15	0	+	156051868	156097093	0	7	500,280,500,500,329,80,385,	0,588,32092,43582,44148,44576,44840,
chr1	156119309	156124661	gencode::SEMA4A::ENSG00000196189.8	0	+	156119309	156124661	0	5	500,423,500,604,151,	0,577,3508,4248,5201,
chr1	156163379	156164406	gencode::SLC25A44::ENSG00000160785.9	0	+	156163379	156164406	0	2	500,366,	0,661,
chr1	156182587	156183299	gencode::PMF1-BGLAP::ENSG00000260238.1	0	+	156182587	156183299	0	2	185,330,	0,382,
chr1	156182587	156183297	gencode::PMF1::ENSG00000160783.15	0	+	156182587	156183297	0	2	185,328,	0,382,
chr1	156211252	156212252	gencode::BGLAP::ENSG00000242252.1	0	+	156211252	156212252	0	2	500,164,	0,836,
chr1	156217425	156218381	gencode::PAQR6::ENSG00000160781.11	0	-	156217425	156218381	0	2	278,500,	0,456,
chr1	156252116	156253120	gencode::SMG5::ENSG00000198952.7	0	-	156252116	156253120	0	3	279,118,262,	0,504,742,
chr1	156252238	156254569	gencode::TMEM79::ENSG00000163472.14	0	+	156252238	156254569	0	5	157,118,385,500,370,	0,382,620,1331,1961,
chr1	156264963	156265963	gencode::C1orf85::ENSG00000198715.7	0	-	156264963	156265963	0	2	351,500,	0,500,
chr1	156269428	156269928	gencode::VHLL::ENSG00000189030.8	0	-	156269428	156269928	0	1	500,	0,
chr1	156306604	156309192	gencode::TSACC::ENSG00000163467.7	0	+	156306604	156309192	0	9	263,71,123,22,149,37,20,35,474,	0,429,738,978,1189,1652,1794,2053,2114,
chr1	156307582	156308756	gencode::CCT3::ENSG00000163468.10	0	-	156307582	156308756	0	5	360,37,20,35,38,	0,674,816,1075,1136,
chr1	156338502	156339502	gencode::RHBG::ENSG00000132677.8	0	+	156338502	156339502	0	2	500,273,	0,727,
chr1	156398684	156399684	gencode::C1orf61::ENSG00000125462.12	0	-	156398684	156399684	0	2	481,500,	0,500,
chr1	156452722	156471120	gencode::MEF2D::ENSG00000116604.13	0	-	156452722	156471120	0	6	306,498,410,500,246,500,	0,502,7169,7669,17307,17898,
chr1	156541832	156542832	gencode::IQGAP3::ENSG00000183856.6	0	-	156541832	156542832	0	2	450,500,	0,500,
chr1	156549018	156551150	gencode::TTC24::ENSG00000187862.7	0	+	156549018	156551150	0	3	500,466,494,	0,534,1638,
chr1	156561053	156562069	gencode::APOA1BP::ENSG00000163382.7	0	+	156561053	156562069	0	3	500,110,66,	0,727,950,
chr1	156570762	156571775	gencode::GPATCH4::ENSG00000160818.12	0	-	156570762	156571775	0	2	436,500,	0,513,
chr1	156588585	156589585	gencode::HAPLN2::ENSG00000132702.8	0	+	156588585	156589585	0	2	500,256,	0,744,
chr1	156611239	156612534	gencode::BCAN::ENSG00000132692.14	0	+	156611239	156612534	0	2	500,465,	0,830,
chr1	156647189	156647689	gencode::NES::ENSG00000132688.10	0	-	156647189	156647689	0	1	500,	0,
chr1	156674893	156676039	gencode::CRABP2::ENSG00000143320.4	0	-	156674893	156676039	0	3	273,105,500,	0,500,646,
chr1	156699009	156699091	gencode::ISG20L2::ENSG00000143319.12	0	-	156699009	156699091	0	1	82,	0,
chr1	156699009	156702316	gencode::RRNAD1::ENSG00000143303.7	0	+	156699009	156702316	0	3	242,464,49,	0,2307,3258,
chr1	156710380	156711423	gencode::MRPL24::ENSG00000143314.8	0	-	156710380	156711423	0	2	421,500,	0,543,
chr1	156720585	156722740	gencode::HDGF::ENSG00000143321.14	0	-	156720585	156722740	0	4	453,47,291,500,	0,500,951,1655,
chr1	156736791	156737291	gencode::PRCC::ENSG00000143294.10	0	+	156736791	156737291	0	1	500,	0,
chr1	156785015	156831185	gencode::NTRK1::ENSG00000198400.7	0	+	156785015	156831185	0	5	432,163,59,500,245,	0,617,873,45091,45925,
chr1	156786126	156787154	gencode::SH2D2A::ENSG00000027869.7	0	-	156786126	156787154	0	2	338,500,	0,528,
chr1	156828310	156829310	gencode::INSRR::ENSG00000027644.4	0	-	156828310	156829310	0	2	16,500,	0,500,
chr1	156863011	156864022	gencode::PEAR1::ENSG00000187800.9	0	+	156863011	156864022	0	2	500,391,	0,620,
chr1	156889941	156890941	gencode::LRRC71::ENSG00000160838.9	0	+	156889941	156890941	0	2	500,184,	0,816,
chr1	156918306	157015662	gencode::ARHGEF11::ENSG00000132694.14	0	-	156918306	157015662	0	3	56,500,500,	0,500,96856,
chr1	157069172	157070100	gencode::ETV3L::ENSG00000253831.1	0	-	157069172	157070100	0	2	83,500,	0,428,
chr1	157107659	157108766	gencode::ETV3::ENSG00000117036.7	0	-	157107659	157108766	0	2	446,500,	0,607,
chr1	157521680	157522810	gencode::FCRL5::ENSG00000143297.14	0	-	157521680	157522810	0	2	439,500,	0,630,
chr1	157567370	157568370	gencode::FCRL4::ENSG00000163518.6	0	-	157567370	157568370	0	2	331,500,	0,500,
chr1	157670028	157671147	gencode::FCRL3::ENSG00000160856.16	0	-	157670028	157671147	0	3	218,72,500,	0,349,619,
chr1	157737564	157747422	gencode::FCRL2::ENSG00000132704.11	0	-	157737564	157747422	0	3	500,421,500,	0,8845,9358,
chr1	157789350	157790395	gencode::FCRL1::ENSG00000163534.10	0	-	157789350	157790395	0	2	444,500,	0,545,
chr1	157811088	157812088	gencode::CD5L::ENSG00000073754.5	0	-	157811088	157812088	0	2	373,500,	0,500,
chr1	157962562	158056969	gencode::KIRREL::ENSG00000183853.13	0	+	157962562	158056969	0	4	500,410,414,431,	0,962,93407,93976,
chr1	158149236	158150236	gencode::CD1D::ENSG00000158473.6	0	+	158149236	158150236	0	2	500,282,	0,718,
chr1	158223426	158223926	gencode::CD1A::ENSG00000158477.6	0	+	158223426	158223926	0	1	500,	0,
chr1	158259075	158260075	gencode::CD1C::ENSG00000158481.8	0	+	158259075	158260075	0	2	500,158,	0,842,
chr1	158300854	158301821	gencode::CD1B::ENSG00000158485.6	0	-	158300854	158301821	0	2	296,500,	0,467,
chr1	158322753	158324164	gencode::CD1E::ENSG00000158488.11	0	+	158322753	158324164	0	3	500,167,326,	0,565,1085,
chr1	158369256	158369756	gencode::OR10T2::ENSG00000186306.1	0	-	158369256	158369756	0	1	500,	0,
chr1	158390656	158391156	gencode::OR10K2::ENSG00000180708.4	0	-	158390656	158391156	0	1	500,	0,
chr1	158434771	158435271	gencode::OR10K1::ENSG00000173285.2	0	+	158434771	158435271	0	1	500,	0,
chr1	158449167	158449667	gencode::OR10R2::ENSG00000198965.3	0	+	158449167	158449667	0	1	500,	0,
chr1	158517895	158518395	gencode::OR6Y1::ENSG00000197532.1	0	-	158517895	158518395	0	1	500,	0,
chr1	158533394	158533894	gencode::OR6P1::ENSG00000186440.1	0	-	158533394	158533894	0	1	500,	0,
chr1	158549689	158550189	gencode::OR10X1::ENSG00000186400.3	0	-	158549689	158550189	0	1	500,	0,
chr1	158575728	158576228	gencode::OR10Z1::ENSG00000198967.3	0	+	158575728	158576228	0	1	500,	0,
chr1	158655988	158656988	gencode::SPTA1::ENSG00000163554.7	0	-	158655988	158656988	0	2	293,500,	0,500,
chr1	158670486	158670986	gencode::OR6K2::ENSG00000196171.2	0	-	158670486	158670986	0	1	500,	0,
chr1	158687953	158688453	gencode::OR6K3::ENSG00000203757.1	0	-	158687953	158688453	0	1	500,	0,
chr1	158724009	158724509	gencode::OR6K6::ENSG00000180433.4	0	+	158724009	158724509	0	1	500,	0,
chr1	158736492	158736992	gencode::OR6N1::ENSG00000197403.2	0	-	158736492	158736992	0	1	500,	0,
chr1	158747425	158747925	gencode::OR6N2::ENSG00000188340.1	0	-	158747425	158747925	0	1	500,	0,
chr1	158800606	158801606	gencode::MNDA::ENSG00000163563.7	0	+	158800606	158801606	0	2	500,257,	0,743,
chr1	158900841	158901857	gencode::PYHIN1::ENSG00000163564.10	0	+	158900841	158901857	0	2	500,289,	0,727,
chr1	158979181	158984970	gencode::IFI16::ENSG00000163565.14	0	+	158979181	158984970	0	4	500,346,478,233,	0,772,4789,5556,
chr1	159046191	159047191	gencode::AIM2::ENSG00000163568.9	0	-	159046191	159047191	0	2	229,500,	0,500,
chr1	159140898	159141898	gencode::CADM3::ENSG00000162706.8	0	+	159140898	159141898	0	2	500,253,	0,747,
chr1	159173262	159175200	gencode::DARC::ENSG00000213088.5	0	+	159173262	159175200	0	2	806,428,	0,1510,
chr1	159259003	159272625	gencode::FCER1A::ENSG00000179639.6	0	+	159259003	159272625	0	4	500,458,468,414,	0,542,12622,13208,
chr1	159284449	159284949	gencode::OR10J3::ENSG00000196266.4	0	-	159284449	159284949	0	1	500,	0,
chr1	159409011	159409511	gencode::OR10J1::ENSG00000196184.7	0	+	159409011	159409511	0	1	500,	0,
chr1	159505842	159506342	gencode::OR10J5::ENSG00000184155.7	0	-	159505842	159506342	0	1	500,	0,
chr1	159557114	159557888	gencode::APCS::ENSG00000132703.3	0	+	159557114	159557888	0	2	500,111,	0,663,
chr1	159683930	159684879	gencode::CRP::ENSG00000132693.8	0	-	159683930	159684879	0	2	282,500,	0,449,
chr1	159750221	159751292	gencode::DUSP23::ENSG00000158716.4	0	+	159750221	159751292	0	2	500,133,	0,938,
chr1	159769801	159772713	gencode::FCRL6::ENSG00000181036.9	0	+	159769801	159772713	0	4	500,396,500,466,	0,604,1905,2446,
chr1	159796039	159797100	gencode::SLAMF8::ENSG00000158714.6	0	+	159796039	159797100	0	2	500,370,	0,691,
chr1	159824818	159825637	gencode::C1orf204::ENSG00000188004.5	0	-	159824818	159825637	0	2	145,500,	0,319,
chr1	159831947	159832947	gencode::VSIG8::ENSG00000243284.1	0	-	159831947	159832947	0	2	313,500,	0,500,
chr1	159867559	159870453	gencode::CCDC19::ENSG00000213085.5	0	-	159867559	159870453	0	4	294,500,430,500,	0,500,1894,2394,
chr1	159879659	159880659	gencode::AL590560.1::ENSG00000269620.1	0	-	159879659	159880659	0	2	224,500,	0,500,
chr1	159893007	159896022	gencode::TAGLN2::ENSG00000158710.10	0	-	159893007	159896022	0	5	216,774,500,215,500,	0,500,1334,2015,2515,
chr1	159914886	159915886	gencode::IGSF9::ENSG00000085552.12	0	-	159914886	159915886	0	2	474,500,	0,500,
chr1	159923510	159924544	gencode::SLAMF9::ENSG00000162723.5	0	-	159923510	159924544	0	2	369,500,	0,534,
chr1	160001783	160002283	gencode::PIGM::ENSG00000143315.5	0	-	160001783	160002283	0	1	500,	0,
chr1	160039538	160040538	gencode::KCNJ10::ENSG00000177807.6	0	-	160039538	160040538	0	2	271,500,	0,500,
chr1	160050859	160051859	gencode::KCNJ9::ENSG00000162728.4	0	+	160050859	160051859	0	2	500,370,	0,630,
chr1	160067979	160068979	gencode::IGSF8::ENSG00000162729.9	0	-	160067979	160068979	0	2	217,500,	0,500,
chr1	160085062	160086066	gencode::ATP1A2::ENSG00000018625.10	0	+	160085062	160086066	0	2	500,401,	0,603,
chr1	160120859	160147700	gencode::ATP1A4::ENSG00000132681.12	0	+	160120859	160147700	0	3	500,500,244,	0,25841,26597,
chr1	160159784	160168464	gencode::CASQ1::ENSG00000143318.8	0	+	160159784	160168464	0	4	500,23,500,348,	0,1038,7715,8332,
chr1	160174626	160175710	gencode::PEA15::ENSG00000162734.8	0	+	160174626	160175710	0	2	500,396,	0,688,
chr1	160231715	160255420	gencode::DCAF8::ENSG00000132716.14	0	-	160231715	160255420	0	4	189,500,422,484,	0,576,22705,23221,
chr1	160254416	160255436	gencode::PEX19::ENSG00000162735.14	0	-	160254416	160255436	0	2	426,500,	0,520,
chr1	160254420	160255420	gencode::DCAF8::ENSG00000258465.2	0	-	160254420	160255420	0	2	422,484,	0,516,
chr1	160312538	160313690	gencode::COPA::ENSG00000122218.10	0	-	160312538	160313690	0	2	380,417,	0,735,
chr1	160312561	160320398	gencode::NCSTN::ENSG00000162736.11	0	+	160312561	160320398	0	7	357,402,384,103,261,430,356,	0,712,1318,1845,2057,6901,7481,
chr1	160336356	160337356	gencode::NHLH1::ENSG00000171786.5	0	+	160336356	160337356	0	2	500,227,	0,773,
chr1	160369875	160370875	gencode::VANGL2::ENSG00000162738.5	0	+	160369875	160370875	0	2	500,214,	0,786,
chr1	160492532	160493552	gencode::SLAMF6::ENSG00000162739.9	0	-	160492532	160493552	0	2	399,500,	0,520,
chr1	160548763	160549806	gencode::CD84::ENSG00000066294.10	0	-	160548763	160549806	0	2	416,500,	0,543,
chr1	160616311	160617585	gencode::SLAMF1::ENSG00000117090.10	0	-	160616311	160617585	0	2	346,500,	0,774,
chr1	160681093	160682141	gencode::CD48::ENSG00000117091.5	0	-	160681093	160682141	0	2	376,500,	0,548,
chr1	160708538	160709580	gencode::SLAMF7::ENSG00000026751.12	0	+	160708538	160709580	0	2	500,432,	0,610,
chr1	160765363	160766476	gencode::LY9::ENSG00000122224.13	0	+	160765363	160766476	0	2	500,373,	0,740,
chr1	160831990	160833192	gencode::CD244::ENSG00000122223.8	0	-	160831990	160833192	0	2	414,500,	0,702,
chr1	160854460	160855460	gencode::ITLN1::ENSG00000179914.4	0	-	160854460	160855460	0	3	147,173,500,	0,215,500,
chr1	160924089	160925089	gencode::ITLN2::ENSG00000158764.6	0	-	160924089	160925089	0	3	85,272,500,	0,153,500,
chr1	160990386	160991638	gencode::F11R::ENSG00000158769.13	0	-	160990386	160991638	0	2	411,500,	0,752,
chr1	161008019	161009040	gencode::TSTD1::ENSG00000215845.6	0	-	161008019	161009040	0	3	319,148,260,	0,500,761,
chr1	161012674	161016267	gencode::USF1::ENSG00000158773.10	0	-	161012674	161016267	0	6	381,497,468,500,388,500,	0,478,1557,2057,2583,3093,
chr1	161035154	161036154	gencode::AL591806.1::ENSG00000268154.1	0	+	161035154	161036154	0	3	500,135,211,	0,545,789,
chr1	161038956	161040260	gencode::ARHGAP30::ENSG00000186517.9	0	-	161038956	161040260	0	2	359,500,	0,804,
chr1	161045772	161059889	gencode::PVRL4::ENSG00000143217.7	0	-	161045772	161059889	0	4	370,500,116,500,	0,500,13117,13617,
chr1	161067683	161068183	gencode::KLHDC9::ENSG00000162755.9	0	+	161067683	161068183	0	1	500,	0,
chr1	161087390	161088407	gencode::NIT1::ENSG00000158793.9	0	+	161087390	161088407	0	2	349,64,	0,953,
chr1	161087401	161088401	gencode::PFDN2::ENSG00000143256.4	0	-	161087401	161088401	0	2	338,58,	0,942,
chr1	161100127	161102978	gencode::DEDD::ENSG00000158796.12	0	-	161100127	161102978	0	5	475,488,422,82,500,	0,512,1629,2129,2351,
chr1	161123041	161124041	gencode::UFC1::ENSG00000143222.7	0	+	161123041	161124041	0	2	500,129,	0,871,
chr1	161128753	161129826	gencode::USP21::ENSG00000143258.11	0	+	161128753	161129826	0	2	500,356,	0,717,
chr1	161135699	161136800	gencode::PPOX::ENSG00000143224.13	0	+	161135699	161136800	0	3	500,163,74,	0,765,1027,
chr1	161146907	161147787	gencode::B4GALT3::ENSG00000158850.10	0	-	161146907	161147787	0	2	303,500,	0,380,
chr1	161168846	161169346	gencode::ADAMTS4::ENSG00000158859.9	0	-	161168846	161169346	0	2	258,31,	0,469,
chr1	161168846	161172661	gencode::NDUFS2::ENSG00000158864.8	0	+	161168846	161172661	0	4	258,289,498,389,	0,469,2590,3426,
chr1	161184568	161185586	gencode::FCER1G::ENSG00000158869.6	0	+	161184568	161185586	0	2	500,424,	0,594,
chr1	161189659	161190659	gencode::AL590714.1::ENSG00000268387.1	0	+	161189659	161190659	0	3	500,1,170,	0,517,830,
chr1	161192698	161193921	gencode::APOA2::ENSG00000158874.7	0	-	161192698	161193921	0	4	7,295,72,500,	0,144,519,723,
chr1	161195292	161196593	gencode::TOMM40L::ENSG00000158882.8	0	+	161195292	161196593	0	3	500,165,197,	0,636,1104,
chr1	161205855	161208592	gencode::NR1I3::ENSG00000143257.7	0	-	161205855	161208592	0	4	391,465,437,500,	0,535,1536,2237,
chr1	161228016	161229016	gencode::PCP4L1::ENSG00000248485.1	0	+	161228016	161229016	0	2	500,241,	0,759,
chr1	161276761	161280262	gencode::MPZ::ENSG00000158887.11	0	-	161276761	161280262	0	4	284,500,364,500,	0,500,2501,3001,
chr1	161283546	161284677	gencode::SDHC::ENSG00000143252.10	0	+	161283546	161284677	0	2	500,460,	0,671,
chr1	161337164	161338164	gencode::C1orf192::ENSG00000188931.3	0	-	161337164	161338164	0	2	465,500,	0,500,
chr1	161474719	161475719	gencode::FCGR2A::ENSG00000143226.9	0	+	161474719	161475719	0	2	500,375,	0,625,
chr1	161493535	161494035	gencode::HSPA6::ENSG00000173110.6	0	+	161493535	161494035	0	1	500,	0,
chr1	161519318	161601417	gencode::FCGR3A::ENSG00000203747.5	0	-	161519318	161601417	0	5	166,500,500,425,259,	0,500,1095,81099,81840,
chr1	161550600	161633450	gencode::FCGR2B::ENSG00000072694.14	0	+	161550600	161633450	0	4	500,384,500,305,	0,741,81836,82545,
chr1	161564842	161565842	gencode::FCGR2C::ENSG00000244682.3	0	+	161564842	161565842	0	2	500,78,	0,922,
chr1	161600496	161602253	gencode::FCGR3B::ENSG00000162747.5	0	-	161600496	161602253	0	3	346,515,500,	0,662,1257,
chr1	161676261	161677584	gencode::FCRLA::ENSG00000132185.12	0	+	161676261	161677584	0	2	500,449,	0,874,
chr1	161690852	161692956	gencode::FCRLB::ENSG00000162746.10	0	+	161690852	161692956	0	6	500,89,210,492,281,155,	0,601,790,1096,1643,1949,
chr1	161719059	161720059	gencode::DUSP12::ENSG00000081721.7	0	+	161719059	161720059	0	2	500,122,	0,878,
chr1	161735583	161736583	gencode::ATF6::ENSG00000118217.5	0	+	161735583	161736583	0	2	500,349,	0,651,
chr1	161954522	161994144	gencode::OLFML2B::ENSG00000162745.6	0	-	161954522	161994144	0	4	69,500,114,500,	0,500,38408,39122,
chr1	162039063	162332772	gencode::NOS1AP::ENSG00000198929.8	0	+	162039063	162332772	0	2	500,500,	0,293209,
chr1	162335361	162335696	gencode::RP11-565P22.6::ENSG00000254706.1	0	+	162335361	162335696	0	1	335,	0,
chr1	162346160	162347160	gencode::C1orf111::ENSG00000171722.7	0	-	162346160	162347160	0	2	315,500,	0,500,
chr1	162348130	162352019	gencode::C1orf226::ENSG00000239887.3	0	+	162348130	162352019	0	4	500,307,500,9,	0,693,2889,3880,
chr1	162381416	162382416	gencode::SH2D1B::ENSG00000198574.4	0	-	162381416	162382416	0	2	254,500,	0,500,
chr1	162466540	162468132	gencode::UHMK1::ENSG00000152332.11	0	+	162466540	162468132	0	3	500,506,72,	0,548,1520,
chr1	162530822	162536326	gencode::UAP1::ENSG00000117143.9	0	+	162530822	162536326	0	4	500,253,473,186,	0,747,4504,5318,
chr1	162601754	162602759	gencode::DDR2::ENSG00000162733.12	0	+	162601754	162602759	0	2	500,336,	0,669,
chr1	162760012	162761078	gencode::HSD17B7::ENSG00000132196.9	0	+	162760012	162761078	0	2	500,451,	0,615,
chr1	162838051	162839105	gencode::C1orf110::ENSG00000185860.9	0	-	162838051	162839105	0	2	389,500,	0,554,
chr1	163038064	163042333	gencode::RGS4::ENSG00000117152.9	0	+	163038064	163042333	0	6	500,150,330,500,247,42,	0,720,1256,3269,3871,4227,
chr1	163172125	163187926	gencode::RGS5::ENSG00000143248.8	0	-	163172125	163187926	0	4	454,500,387,500,	0,778,14801,15301,
chr1	163291189	163292243	gencode::NUF2::ENSG00000143228.8	0	+	163291189	163292243	0	2	500,239,	0,815,
chr1	164527936	164762228	gencode::PBX1::ENSG00000185630.14	0	+	164527936	164762228	0	7	500,103,128,500,407,500,251,	0,832,1316,66806,67399,233292,234041,
chr1	165324483	165326452	gencode::LMX1A::ENSG00000162761.10	0	-	165324483	165326452	0	4	235,321,111,500,	0,500,995,1469,
chr1	165413933	165414933	gencode::RXRG::ENSG00000143171.8	0	-	165413933	165414933	0	2	146,500,	0,500,
chr1	165512743	165513243	gencode::LRRC52::ENSG00000162763.3	0	+	165512743	165513243	0	1	500,	0,
chr1	165599597	165601976	gencode::MGST3::ENSG00000143198.8	0	+	165599597	165601976	0	4	500,767,84,463,	0,935,1784,1916,
chr1	165667045	165668600	gencode::ALDH9A1::ENSG00000143149.8	0	-	165667045	165668600	0	3	439,67,500,	0,500,1055,
chr1	165737613	165797492	gencode::TMCO1::ENSG00000143183.12	0	-	165737613	165797492	0	4	303,500,212,321,	0,804,58879,59558,
chr1	165796267	165864806	gencode::UCK2::ENSG00000143179.8	0	+	165796267	165864806	0	3	437,387,500,	0,904,68039,
chr1	166028709	166029209	gencode::AL626787.1::ENSG00000267884.1	0	-	166028709	166029209	0	1	500,	0,
chr1	166135958	166136706	gencode::FAM78B::ENSG00000188859.5	0	-	166135958	166136706	0	2	127,500,	0,248,
chr1	166808180	166809825	gencode::POGK::ENSG00000143157.7	0	+	166808180	166809825	0	3	500,482,140,	0,663,1505,
chr1	166845064	166846064	gencode::TADA1::ENSG00000152382.5	0	-	166845064	166846064	0	2	330,500,	0,500,
chr1	166944061	166945219	gencode::ILDR2::ENSG00000143195.8	0	-	166944061	166945219	0	2	396,500,	0,658,
chr1	166957845	166958971	gencode::MAEL::ENSG00000143194.8	0	+	166957845	166958971	0	2	500,248,	0,878,
chr1	167059368	167060368	gencode::GPA33::ENSG00000143167.7	0	-	167059368	167060368	0	2	111,500,	0,500,
chr1	167062781	167064586	gencode::DUSP27::ENSG00000198842.5	0	+	167062781	167064586	0	4	500,143,386,388,	0,652,901,1417,
chr1	167189565	167298780	gencode::POU2F1::ENSG00000143190.17	0	+	167189565	167298780	0	4	500,445,500,235,	0,632,108215,108980,
chr1	167487275	167488347	gencode::CD247::ENSG00000198821.6	0	-	167487275	167488347	0	2	367,500,	0,572,
chr1	167522504	167523504	gencode::CREG1::ENSG00000143162.7	0	-	167522504	167523504	0	2	118,500,	0,500,
chr1	167598829	167600136	gencode::RCSD1::ENSG00000198771.6	0	+	167598829	167600136	0	2	500,468,	0,839,
chr1	167690686	167691888	gencode::MPZL1::ENSG00000197965.7	0	+	167690686	167691888	0	2	500,407,	0,795,
chr1	167882827	167883953	gencode::ADCY10::ENSG00000143199.13	0	-	167882827	167883953	0	2	384,500,	0,626,
chr1	167904778	167906778	gencode::MPC2::ENSG00000143158.6	0	-	167904778	167906778	0	3	190,620,500,	0,500,1500,
chr1	167905398	167906555	gencode::DCAF6::ENSG00000143164.11	0	+	167905398	167906555	0	2	500,277,	0,880,
chr1	168073667	168107321	gencode::GPR161::ENSG00000143147.10	0	-	168073667	168107321	0	5	45,500,124,497,500,	0,500,31454,32236,33154,
chr1	168147670	168148792	gencode::TIPRL::ENSG00000143155.8	0	+	168147670	168148792	0	2	500,371,	0,751,
chr1	168194687	168195754	gencode::SFT2D2::ENSG00000213064.5	0	+	168194687	168195754	0	2	500,372,	0,695,
chr1	168249777	168250777	gencode::TBX19::ENSG00000143178.8	0	+	168249777	168250777	0	2	500,244,	0,756,
chr1	168512735	168513735	gencode::XCL2::ENSG00000143185.3	0	-	168512735	168513735	0	2	404,500,	0,500,
chr1	168545210	168546210	gencode::XCL1::ENSG00000143184.4	0	+	168545210	168546210	0	2	500,272,	0,728,
chr1	168698002	168699002	gencode::DPT::ENSG00000143196.4	0	-	168698002	168699002	0	2	103,500,	0,500,
chr1	169074434	169080335	gencode::ATP1B1::ENSG00000143153.8	0	+	169074434	169080335	0	6	500,505,500,335,500,392,	0,621,2251,2916,4901,5509,
chr1	169336684	169337705	gencode::NME7::ENSG00000143156.9	0	-	169336684	169337705	0	3	259,2,123,	0,521,898,
chr1	169336707	169337707	gencode::BLZF1::ENSG00000117475.9	0	+	169336707	169337707	0	3	236,2,125,	0,498,875,
chr1	169396155	169430407	gencode::CCDC181::ENSG00000117477.8	0	-	169396155	169430407	0	4	368,500,81,500,	0,557,33252,33752,
chr1	169454669	169455741	gencode::SLC19A2::ENSG00000117479.8	0	-	169454669	169455741	0	2	129,500,	0,572,
chr1	169555219	169556326	gencode::F5::ENSG00000198734.6	0	-	169555219	169556326	0	2	245,500,	0,607,
chr1	169598814	169599931	gencode::SELP::ENSG00000174175.12	0	-	169598814	169599931	0	2	493,500,	0,617,
chr1	169680339	169681339	gencode::SELL::ENSG00000188404.4	0	-	169680339	169681339	0	2	295,500,	0,500,
chr1	169702300	169703720	gencode::SELE::ENSG00000007908.11	0	-	169702300	169703720	0	3	414,306,500,	0,503,920,
chr1	169763330	169764549	gencode::METTL18::ENSG00000171806.7	0	-	169763330	169764549	0	4	441,123,73,193,	0,500,777,1026,
chr1	169763680	169764549	gencode::C1orf112::ENSG00000000460.12	0	+	169763680	169764549	0	4	91,123,73,193,	0,150,427,676,
chr1	169857529	169863593	gencode::SCYL3::ENSG00000000457.9	0	-	169857529	169863593	0	4	285,496,350,500,	0,504,5047,5564,
chr1	169994542	170044336	gencode::KIFAP3::ENSG00000075945.8	0	-	169994542	170044336	0	5	419,500,500,345,500,	0,500,43516,48687,49294,
chr1	170114641	170115641	gencode::METTL11B::ENSG00000203740.3	0	+	170114641	170115641	0	2	500,237,	0,763,
chr1	170500769	170501771	gencode::GORAB::ENSG00000120370.8	0	+	170500769	170501771	0	2	500,344,	0,658,
chr1	170631774	170632274	gencode::PRRX1::ENSG00000116132.7	0	+	170631774	170632274	0	1	500,	0,
chr1	170904111	170905166	gencode::MROH9::ENSG00000117501.10	0	+	170904111	170905166	0	2	500,436,	0,619,
chr1	171059517	171060545	gencode::FMO3::ENSG00000007933.8	0	+	171059517	171060545	0	2	500,421,	0,607,
chr1	171106740	171107740	gencode::FMO6P::ENSG00000117507.4	0	+	171106740	171107740	0	2	500,256,	0,744,
chr1	171153846	171154844	gencode::FMO2::ENSG00000094963.9	0	+	171153846	171154844	0	2	500,344,	0,654,
chr1	171217137	171227595	gencode::FMO1::ENSG00000010932.11	0	+	171217137	171227595	0	4	500,425,500,235,	0,627,9458,10223,
chr1	171282872	171283872	gencode::FMO4::ENSG00000076258.5	0	+	171282872	171283872	0	2	500,318,	0,682,
chr1	171454150	171455194	gencode::PRRC2C::ENSG00000117523.11	0	+	171454150	171455194	0	2	500,318,	0,726,
chr1	171621823	171622323	gencode::MYOC::ENSG00000034971.10	0	-	171621823	171622323	0	1	500,	0,
chr1	171710702	171711887	gencode::VAMP4::ENSG00000117533.10	0	-	171710702	171711887	0	2	345,500,	0,685,
chr1	171750287	171751341	gencode::METTL13::ENSG00000010165.15	0	+	171750287	171751341	0	2	500,79,	0,975,
chr1	171810120	171811168	gencode::DNM3::ENSG00000197959.9	0	+	171810120	171811168	0	2	500,209,	0,839,
chr1	172389327	172422532	gencode::C1orf105::ENSG00000180999.6	0	+	172389327	172422532	0	4	500,325,500,201,	0,721,32205,33004,
chr1	172413230	172413730	gencode::PIGC::ENSG00000135845.5	0	-	172413230	172413730	0	1	500,	0,
chr1	172500988	172502856	gencode::SUCO::ENSG00000094975.9	0	+	172500988	172502856	0	3	500,371,217,	0,955,1651,
chr1	172627653	172628153	gencode::FASLG::ENSG00000117560.6	0	+	172627653	172628153	0	1	500,	0,
chr1	173019556	173020603	gencode::TNFSF18::ENSG00000120337.7	0	-	173019556	173020603	0	2	322,500,	0,547,
chr1	173174197	173176952	gencode::TNFSF4::ENSG00000117586.6	0	-	173174197	173176952	0	4	250,500,208,500,	0,500,1755,2255,
chr1	173445904	173446904	gencode::PRDX6::ENSG00000117592.8	0	+	173445904	173446904	0	2	500,271,	0,729,
chr1	173571689	173572733	gencode::SLC9C2::ENSG00000162753.10	0	-	173571689	173572733	0	2	198,500,	0,544,
chr1	173638501	173639501	gencode::ANKRD45::ENSG00000183831.6	0	-	173638501	173639501	0	2	452,500,	0,500,
chr1	173683608	173684622	gencode::KLHL20::ENSG00000076321.6	0	+	173683608	173684622	0	2	500,403,	0,611,
chr1	173792770	173793640	gencode::CENPL::ENSG00000120334.11	0	-	173792770	173793640	0	3	291,3,180,	0,500,690,
chr1	173793270	173793640	gencode::DARS2::ENSG00000117593.8	0	+	173793270	173793640	0	2	3,180,	0,190,
chr1	173836719	173838593	gencode::ZBTB37::ENSG00000185278.10	0	+	173836719	173838593	0	4	500,97,515,333,	0,676,826,1541,
chr1	173886016	173887016	gencode::SERPINC1::ENSG00000117601.9	0	-	173886016	173887016	0	2	338,500,	0,500,
chr1	173961702	173991935	gencode::RC3H1::ENSG00000135870.7	0	-	173961702	173991935	0	4	188,435,296,500,	0,573,29233,29733,
chr1	174128047	174934404	gencode::RABGAP1L::ENSG00000152061.17	0	+	174128047	174934404	0	14	500,357,500,152,374,500,500,449,500,330,450,332,500,280,	0,750,541115,541958,542238,640522,715048,715599,716136,716806,718030,718698,805357,806077,
chr1	174416711	174417211	gencode::GPR52::ENSG00000203737.2	0	+	174416711	174417211	0	1	500,	0,
chr1	174967799	174969848	gencode::CACYBP::ENSG00000116161.13	0	+	174967799	174969848	0	4	500,41,15,111,	0,1028,1534,1938,
chr1	174992061	174993061	gencode::MRPS14::ENSG00000120333.4	0	-	174992061	174993061	0	2	436,500,	0,500,
chr1	175036493	175037493	gencode::TNN::ENSG00000120332.11	0	+	175036493	175037493	0	2	500,420,	0,580,
chr1	175161390	175162579	gencode::KIAA0040::ENSG00000235750.5	0	-	175161390	175162579	0	3	383,64,500,	0,539,689,
chr1	175712252	175713406	gencode::TNR::ENSG00000116147.12	0	-	175712252	175713406	0	2	107,500,	0,654,
chr1	176175614	176177129	gencode::RFWD2::ENSG00000143207.15	0	-	176175614	176177129	0	2	91,500,	0,1015,
chr1	176431806	176432806	gencode::PAPPA2::ENSG00000116183.6	0	+	176431806	176432806	0	2	500,250,	0,750,
chr1	177133319	177134524	gencode::ASTN1::ENSG00000152092.11	0	-	177133319	177134524	0	2	208,500,	0,705,
chr1	177140132	177141132	gencode::BRINP2::ENSG00000198797.6	0	+	177140132	177141132	0	2	500,262,	0,738,
chr1	177938550	177939848	gencode::SEC16B::ENSG00000120341.14	0	-	177938550	177939848	0	3	466,272,500,	0,500,798,
chr1	178062363	178311105	gencode::RASAL2::ENSG00000075391.12	0	+	178062363	178311105	0	3	500,500,360,	0,247742,248382,
chr1	178481711	178482778	gencode::TEX35::ENSG00000240021.5	0	+	178481711	178482778	0	2	500,390,	0,677,
chr1	178511386	178514345	gencode::C1orf220::ENSG00000213057.4	0	+	178511386	178514345	0	4	500,364,452,180,	0,636,2169,2779,
chr1	178511449	178512449	gencode::C1ORF220::ENSG00000184909.8	0	+	178511449	178512449	0	2	437,427,	0,573,
chr1	178693799	178694878	gencode::RALGPS2::ENSG00000116191.13	0	+	178693799	178694878	0	2	500,322,	0,757,
chr1	178839657	178840687	gencode::ANGPTL1::ENSG00000116194.8	0	-	178839657	178840687	0	2	216,500,	0,530,
chr1	178994530	178995530	gencode::FAM20B::ENSG00000116199.7	0	+	178994530	178995530	0	2	500,295,	0,705,
chr1	179050011	179051720	gencode::TOR3A::ENSG00000186283.9	0	+	179050011	179051720	0	2	500,196,	0,1513,
chr1	179111679	179199319	gencode::ABL2::ENSG00000143322.15	0	-	179111679	179199319	0	4	386,500,341,500,	0,545,86353,87140,
chr1	179262424	179263436	gencode::SOAT1::ENSG00000057252.8	0	+	179262424	179263436	0	2	500,363,	0,649,
chr1	179334354	179335375	gencode::AXDND1::ENSG00000162779.16	0	+	179334354	179335375	0	2	500,238,	0,783,
chr1	179457305	179458305	gencode::AL160286.1::ENSG00000269064.1	0	-	179457305	179458305	0	2	430,500,	0,500,
chr1	179544568	179545587	gencode::NPHS2::ENSG00000116218.8	0	-	179544568	179545587	0	2	155,500,	0,519,
chr1	179560247	179561442	gencode::TDRD5::ENSG00000162782.11	0	+	179560247	179561442	0	3	500,222,180,	0,555,1015,
chr1	179711797	179712797	gencode::FAM163A::ENSG00000143340.6	0	+	179711797	179712797	0	2	500,237,	0,763,
chr1	179833811	179834568	gencode::IFRG15::ENSG00000258664.1	0	-	179833811	179834568	0	2	104,257,	0,500,
chr1	179846510	179847438	gencode::TOR1AIP2::ENSG00000169905.8	0	-	179846510	179847438	0	2	315,500,	0,428,
chr1	179850676	179852330	gencode::TOR1AIP1::ENSG00000143337.14	0	+	179850676	179852330	0	2	500,216,	0,1438,
chr1	179923372	179924372	gencode::CEP350::ENSG00000135837.11	0	+	179923372	179924372	0	2	500,93,	0,907,
chr1	180123468	180124531	gencode::QSOX1::ENSG00000116260.12	0	+	180123468	180124531	0	2	500,222,	0,841,
chr1	180198920	180199920	gencode::LHX4::ENSG00000121454.4	0	+	180198920	180199920	0	2	500,178,	0,822,
chr1	180472089	180472589	gencode::ACBD6::ENSG00000135847.5	0	-	180472089	180472589	0	1	500,	0,
chr1	180600639	180601667	gencode::XPR1::ENSG00000143324.9	0	+	180600639	180601667	0	2	500,259,	0,769,
chr1	180881824	180897782	gencode::KIAA1614::ENSG00000135835.6	0	+	180881824	180897782	0	4	500,393,500,71,	0,607,14958,15887,
chr1	180941194	180941860	gencode::AL162431.1::ENSG00000234237.2	0	+	180941194	180941860	0	2	500,153,	0,513,
chr1	180991505	180992547	gencode::STX6::ENSG00000135823.9	0	-	180991505	180992547	0	2	267,500,	0,542,
chr1	181002566	181003638	gencode::MR1::ENSG00000153029.10	0	+	181002566	181003638	0	2	500,426,	0,646,
chr1	181057137	181057637	gencode::IER5::ENSG00000162783.8	0	+	181057137	181057637	0	1	500,	0,
chr1	181452215	181453380	gencode::CACNA1E::ENSG00000198216.6	0	+	181452215	181453380	0	2	500,232,	0,933,
chr1	182030347	182031347	gencode::ZNF648::ENSG00000179930.5	0	-	182030347	182031347	0	2	353,500,	0,500,
chr1	182361341	182361841	gencode::GLUL::ENSG00000135821.12	0	-	182361341	182361841	0	1	500,	0,
chr1	182369751	182370251	gencode::TEDDM1::ENSG00000203730.2	0	-	182369751	182370251	0	1	500,	0,
chr1	182418780	182419780	gencode::RGSL1::ENSG00000121446.13	0	+	182418780	182419780	0	2	500,465,	0,535,
chr1	182556108	182558891	gencode::RNASEL::ENSG00000135828.7	0	-	182556108	182558891	0	3	500,408,500,	0,1783,2283,
chr1	182573043	182574043	gencode::RGS16::ENSG00000143333.6	0	-	182573043	182574043	0	2	305,500,	0,500,
chr1	182640488	182642549	gencode::RGS8::ENSG00000135824.8	0	-	182640488	182642549	0	3	301,887,500,	0,576,1561,
chr1	182758403	182763984	gencode::NPL::ENSG00000135838.9	0	+	182758403	182763984	0	6	500,468,471,470,500,408,	0,539,2490,3020,4581,5173,
chr1	182808003	182809003	gencode::DHX9::ENSG00000135829.12	0	+	182808003	182809003	0	2	500,410,	0,590,
chr1	182920619	182923005	gencode::SHCBP1L::ENSG00000157060.10	0	-	182920619	182923005	0	3	450,500,500,	0,500,1886,
chr1	182992094	182992594	gencode::LAMC1::ENSG00000135862.5	0	+	182992094	182992594	0	1	500,	0,
chr1	183154872	183155922	gencode::LAMC2::ENSG00000058085.10	0	+	183154872	183155922	0	2	500,354,	0,696,
chr1	183273509	183388237	gencode::NMNAT2::ENSG00000157064.6	0	-	183273509	183388237	0	4	293,500,78,500,	0,500,113728,114228,
chr1	183441005	183442161	gencode::SMG7::ENSG00000116698.16	0	+	183441005	183442161	0	2	500,375,	0,781,
chr1	183559216	183560511	gencode::NCF2::ENSG00000116701.10	0	-	183559216	183560511	0	3	72,233,500,	0,523,795,
chr1	183604317	183605219	gencode::ARPC5::ENSG00000162704.11	0	-	183604317	183605219	0	2	332,327,	0,575,
chr1	183604892	183774789	gencode::RGL1::ENSG00000143344.11	0	+	183604892	183774789	0	4	327,105,500,329,	0,746,168861,169568,
chr1	183621948	183622948	gencode::APOBEC4::ENSG00000173627.6	0	-	183621948	183622948	0	2	256,500,	0,500,
chr1	183915752	184007363	gencode::COLGALT2::ENSG00000198756.6	0	-	183915752	184007363	0	4	500,500,115,500,	0,17882,90359,91111,
chr1	184020310	184021379	gencode::TSEN15::ENSG00000198860.7	0	+	184020310	184021379	0	2	500,353,	0,716,
chr1	184355691	184356691	gencode::C1orf21::ENSG00000116667.8	0	+	184355691	184356691	0	2	500,187,	0,813,
chr1	184723201	184724547	gencode::EDEM3::ENSG00000116406.14	0	-	184723201	184724547	0	2	419,500,	0,846,
chr1	184943182	184944182	gencode::FAM129A::ENSG00000135842.12	0	-	184943182	184944182	0	2	249,500,	0,500,
chr1	185013995	185015157	gencode::RNF2::ENSG00000121481.6	0	+	185013995	185015157	0	2	500,374,	0,788,
chr1	185126116	185126790	gencode::SWT1::ENSG00000116668.8	0	+	185126116	185126790	0	2	95,342,	0,332,
chr1	185126116	185126616	gencode::TRMT1L::ENSG00000121486.7	0	-	185126116	185126616	0	2	95,168,	0,332,
chr1	185279759	185286961	gencode::IVNS1ABP::ENSG00000116679.11	0	-	185279759	185286961	0	4	465,483,121,500,	0,697,6202,6702,
chr1	185703182	185704182	gencode::HMCN1::ENSG00000143341.7	0	+	185703182	185704182	0	2	500,1,	0,999,
chr1	186264904	186265910	gencode::PRG4::ENSG00000116690.7	0	+	186264904	186265910	0	2	500,483,	0,523,
chr1	186343957	186344889	gencode::TPR::ENSG00000047410.9	0	-	186343957	186344889	0	2	50,432,	0,500,
chr1	186344457	186349417	gencode::C1orf27::ENSG00000157181.10	0	+	186344457	186349417	0	4	432,392,479,399,	0,651,3960,4561,
chr1	186365408	186366408	gencode::AL596220.1::ENSG00000268662.1	0	-	186365408	186366408	0	3	353,34,500,	0,405,500,
chr1	186369203	186369703	gencode::OCLM::ENSG00000262180.1	0	+	186369203	186369703	0	1	500,	0,
chr1	186415137	186430754	gencode::PDC::ENSG00000116703.12	0	-	186415137	186430754	0	7	418,426,401,672,474,434,500,	0,574,2219,2719,3480,14617,15117,
chr1	186649059	186650059	gencode::PTGS2::ENSG00000073756.7	0	-	186649059	186650059	0	2	309,500,	0,500,
chr1	186797584	186798621	gencode::PLA2G4A::ENSG00000116711.8	0	+	186797584	186798621	0	2	500,452,	0,585,
chr1	190444442	190447259	gencode::BRINP3::ENSG00000162670.8	0	-	190444442	190447259	0	4	465,500,316,500,	0,500,1817,2317,
chr1	192127086	192128086	gencode::RGS18::ENSG00000150681.5	0	+	192127086	192128086	0	2	500,198,	0,802,
chr1	192285621	192286621	gencode::RGS21::ENSG00000253148.1	0	+	192285621	192286621	0	2	500,384,	0,616,
chr1	192544356	192545402	gencode::RGS1::ENSG00000090104.7	0	+	192544356	192545402	0	2	500,341,	0,705,
chr1	192604774	192605781	gencode::RGS13::ENSG00000127074.10	0	+	192604774	192605781	0	2	500,332,	0,675,
chr1	192777670	192778670	gencode::RGS2::ENSG00000116741.6	0	+	192777670	192778670	0	2	500,357,	0,643,
chr1	193027967	193029737	gencode::UCHL5::ENSG00000116750.9	0	-	193027967	193029737	0	2	345,383,	0,1387,
chr1	193028051	193038145	gencode::TROVE2::ENSG00000116747.8	0	+	193028051	193038145	0	3	261,332,500,	0,1303,9594,
chr1	193074061	193075744	gencode::GLRX2::ENSG00000023572.4	0	-	193074061	193075744	0	3	330,83,500,	0,500,1183,
chr1	193090646	193091646	gencode::CDC73::ENSG00000134371.9	0	+	193090646	193091646	0	2	500,183,	0,817,
chr1	193155784	193156284	gencode::B3GALT2::ENSG00000162630.5	0	-	193155784	193156284	0	1	500,	0,
chr1	196576989	196578855	gencode::KCNT2::ENSG00000162687.12	0	-	196576989	196578855	0	2	353,500,	0,1366,
chr1	196620507	196621685	gencode::CFH::ENSG00000000971.11	0	+	196620507	196621685	0	2	500,378,	0,800,
chr1	196743424	196744445	gencode::CFHR3::ENSG00000116785.9	0	+	196743424	196744445	0	2	500,369,	0,652,
chr1	196788386	196789410	gencode::CFHR1::ENSG00000244414.2	0	+	196788386	196789410	0	2	500,376,	0,648,
chr1	196788397	196913410	gencode::CFHR2::ENSG00000080910.7	0	+	196788397	196913410	0	4	489,363,500,340,	0,637,124004,124673,
chr1	196818870	196857732	gencode::CFHR4::ENSG00000134365.8	0	+	196818870	196857732	0	4	500,398,500,392,	0,602,37773,38470,
chr1	196946166	196947185	gencode::CFHR5::ENSG00000134389.8	0	+	196946166	196947185	0	2	500,331,	0,688,
chr1	197035897	197036897	gencode::F13B::ENSG00000143278.3	0	-	197035897	197036897	0	2	390,500,	0,500,
chr1	197103774	197116324	gencode::ASPM::ENSG00000066279.12	0	-	197103774	197116324	0	3	449,400,500,	0,600,12050,
chr1	197169672	197170172	gencode::ZBTB41::ENSG00000177888.7	0	-	197169672	197170172	0	1	500,	0,
chr1	197170091	197383458	gencode::CRB1::ENSG00000134376.10	0	+	197170091	197383458	0	10	500,371,500,428,500,354,500,332,500,326,	0,629,66778,67523,131739,132385,158852,159520,212367,213041,
chr1	197704267	197744955	gencode::DENND1B::ENSG00000213047.7	0	-	197704267	197744955	0	4	446,339,444,500,	0,661,39555,40188,
chr1	197871276	197872276	gencode::C1orf53::ENSG00000203724.6	0	+	197871276	197872276	0	2	500,231,	0,769,
chr1	197881120	197886503	gencode::LHX9::ENSG00000143355.11	0	+	197881120	197886503	0	4	500,443,500,500,	0,571,3346,4883,
chr1	198125592	198126750	gencode::NEK7::ENSG00000151414.10	0	+	198125592	198126750	0	2	500,342,	0,816,
chr1	198509304	198510575	gencode::ATP6V1G3::ENSG00000151418.7	0	-	198509304	198510575	0	3	392,137,500,	0,561,771,
chr1	198607645	198608726	gencode::PTPRC::ENSG00000081237.14	0	+	198607645	198608726	0	3	500,84,253,	0,624,828,
chr1	199996229	200012216	gencode::NR5A2::ENSG00000116833.9	0	+	199996229	200012216	0	4	500,200,500,121,	0,812,14987,15866,
chr1	200378853	200379684	gencode::ZNF281::ENSG00000162702.7	0	-	200378853	200379684	0	2	218,500,	0,331,
chr1	200589362	200590362	gencode::KIF14::ENSG00000118193.7	0	-	200589362	200590362	0	2	174,500,	0,500,
chr1	200638497	200639597	gencode::DDX59::ENSG00000118197.9	0	-	200638497	200639597	0	2	395,500,	0,600,
chr1	200708185	200709406	gencode::CAMSAP2::ENSG00000118200.10	0	+	200708185	200709406	0	2	500,310,	0,911,
chr1	200841582	200842082	gencode::GPR25::ENSG00000170128.2	0	+	200841582	200842082	0	1	500,	0,
chr1	200859968	200864448	gencode::C1orf106::ENSG00000163362.6	0	+	200859968	200864448	0	4	500,137,500,231,	0,863,3480,4249,
chr1	200992036	200993328	gencode::KIF21B::ENSG00000116852.10	0	-	200992036	200993328	0	2	432,500,	0,792,
chr1	201081079	201082194	gencode::CACNA1S::ENSG00000081248.6	0	-	201081079	201082194	0	2	234,500,	0,615,
chr1	201085007	201096812	gencode::ASCL5::ENSG00000232237.2	0	-	201085007	201096812	0	3	289,397,500,	0,10805,11305,
chr1	201123568	201141202	gencode::TMEM9::ENSG00000116857.12	0	-	201123568	201141202	0	4	2,500,413,500,	0,61,16634,17134,
chr1	201159452	201160452	gencode::IGFN1::ENSG00000163395.12	0	+	201159452	201160452	0	2	500,415,	0,585,
chr1	201252079	201253330	gencode::PKP1::ENSG00000081277.7	0	+	201252079	201253330	0	2	500,296,	0,955,
chr1	201341882	201347390	gencode::TNNT2::ENSG00000118194.14	0	-	201341882	201347390	0	5	327,99,351,459,500,	0,341,649,4407,5008,
chr1	201368176	201369236	gencode::LAD1::ENSG00000159166.9	0	-	201368176	201369236	0	2	218,500,	0,560,
chr1	201390346	201399494	gencode::TNNI1::ENSG00000159173.14	0	-	201390346	201399494	0	5	452,270,500,330,500,	0,528,803,8148,8648,
chr1	201438365	201438865	gencode::PHLDA3::ENSG00000174307.5	0	-	201438365	201438865	0	1	500,	0,
chr1	201465201	201479084	gencode::CSRP1::ENSG00000159176.9	0	-	201465201	201479084	0	8	116,113,500,282,228,345,478,500,	0,233,500,10266,10766,11341,12883,13383,
chr1	201591512	201592012	gencode::AC096677.1::ENSG00000269690.1	0	+	201591512	201592012	0	1	500,	0,
chr1	201592738	201709495	gencode::NAV1::ENSG00000134369.11	0	+	201592738	201709495	0	4	362,500,500,289,	0,24138,115757,116468,
chr1	201797768	201798768	gencode::IPO9::ENSG00000198700.5	0	+	201797768	201798768	0	2	500,266,	0,734,
chr1	201857335	201858335	gencode::SHISA4::ENSG00000198892.6	0	+	201857335	201858335	0	2	500,138,	0,862,
chr1	201915715	201916215	gencode::LMOD1::ENSG00000163431.11	0	-	201915715	201916215	0	1	500,	0,
chr1	201924118	201925118	gencode::TIMM17A::ENSG00000134375.6	0	+	201924118	201925118	0	2	500,436,	0,564,
chr1	201951251	201952279	gencode::RNPEP::ENSG00000176393.6	0	+	201951251	201952279	0	2	500,36,	0,992,
chr1	201976572	201977072	gencode::ELF3::ENSG00000163435.11	0	+	201976572	201977072	0	1	500,	0,
chr1	202091485	202091985	gencode::GPR37L1::ENSG00000170075.8	0	+	202091485	202091985	0	1	500,	0,
chr1	202113369	202114369	gencode::ARL8A::ENSG00000143862.3	0	-	202113369	202114369	0	2	206,500,	0,500,
chr1	202129119	202131209	gencode::PTPN7::ENSG00000143851.11	0	-	202129119	202131209	0	2	551,500,	0,1590,
chr1	202162528	202183782	gencode::LGR6::ENSG00000133067.13	0	+	202162528	202183782	0	6	500,197,500,358,500,415,	0,803,9835,10477,20254,20839,
chr1	202310608	202311608	gencode::UBE2T::ENSG00000077152.5	0	-	202310608	202311608	0	2	412,500,	0,500,
chr1	202317326	202432370	gencode::PPP1R12B::ENSG00000077157.16	0	+	202317326	202432370	0	4	500,83,500,143,	0,946,114044,114901,
chr1	202612081	202680045	gencode::SYT2::ENSG00000143858.7	0	-	202612081	202680045	0	4	322,500,338,500,	0,500,66964,67464,
chr1	202777046	202779098	gencode::KDM5B::ENSG00000117139.12	0	-	202777046	202779098	0	2	181,500,	0,1552,
chr1	202788893	202792382	gencode::RP11-480I12.4::ENSG00000184774.6	0	+	202788893	202792382	0	3	500,378,498,	0,622,2991,
chr1	202857763	202858763	gencode::RABIF::ENSG00000183155.4	0	-	202857763	202858763	0	2	335,500,	0,500,
chr1	202877789	202898227	gencode::KLHL12::ENSG00000117153.11	0	-	202877789	202898227	0	6	346,500,324,500,379,500,	0,500,18101,18601,19438,19938,
chr1	202926917	202928200	gencode::ADIPOR1::ENSG00000159346.8	0	-	202926917	202928200	0	3	393,83,500,	0,600,783,
chr1	202936028	202936908	gencode::CYB5R1::ENSG00000159348.8	0	-	202936028	202936908	0	2	288,500,	0,380,
chr1	202976013	202977013	gencode::TMEM183A::ENSG00000163444.7	0	+	202976013	202977013	0	3	500,195,20,	0,691,980,
chr1	202995125	203020310	gencode::PPFIA4::ENSG00000143847.11	0	+	202995125	203020310	0	8	500,370,500,109,201,400,277,500,	0,630,7986,8594,8785,18968,19564,24685,
chr1	203055164	203055664	gencode::MYOG::ENSG00000122180.4	0	-	203055164	203055664	0	1	500,	0,
chr1	203059281	203097910	gencode::ADORA1::ENSG00000163485.11	0	+	203059281	203097910	0	5	500,417,500,345,348,	0,583,36411,37777,38281,
chr1	203144441	203145441	gencode::MYBPH::ENSG00000133055.4	0	-	203144441	203145441	0	3	11,85,500,	0,150,500,
chr1	203155377	203156377	gencode::CHI3L1::ENSG00000133048.8	0	-	203155377	203156377	0	3	64,249,500,	0,98,500,
chr1	203198299	203199299	gencode::CHIT1::ENSG00000133063.11	0	-	203198299	203199299	0	2	438,500,	0,500,
chr1	203274163	203275163	gencode::BTG2::ENSG00000159388.5	0	+	203274163	203275163	0	2	500,285,	0,715,
chr1	203320117	203321117	gencode::FMOD::ENSG00000122176.10	0	-	203320117	203321117	0	2	41,500,	0,500,
chr1	203444455	203445455	gencode::PRELP::ENSG00000188783.5	0	+	203444455	203445455	0	2	500,387,	0,613,
chr1	203462770	203463770	gencode::OPTC::ENSG00000188770.5	0	+	203462770	203463770	0	2	500,423,	0,577,
chr1	203595188	203651867	gencode::ATP2B4::ENSG00000058668.10	0	+	203595188	203651867	0	3	500,78,431,	0,1161,56248,
chr1	203733803	203734804	gencode::LAX1::ENSG00000122188.8	0	+	203733803	203734804	0	2	500,20,	0,981,
chr1	203764298	203784532	gencode::ZC3H11A::ENSG00000058673.11	0	+	203764298	203784532	0	4	500,409,500,430,	0,626,19234,19804,
chr1	203764936	203765418	gencode::ZBED6::ENSG00000257315.1	0	+	203764936	203765418	0	1	482,	0,
chr1	203830242	203833252	gencode::SNRPE::ENSG00000182004.8	0	+	203830242	203833252	0	4	500,399,500,397,	0,601,2010,2613,
chr1	204042231	204043231	gencode::SOX13::ENSG00000143842.10	0	+	204042231	204043231	0	2	500,390,	0,610,
chr1	204109890	204121807	gencode::ETNK2::ENSG00000143845.10	0	-	204109890	204121807	0	8	260,50,303,184,103,500,198,500,	0,500,697,5693,6004,6193,10632,11417,
chr1	204134950	204135965	gencode::REN::ENSG00000143839.12	0	-	204134950	204135965	0	2	371,500,	0,515,
chr1	204165114	204166114	gencode::KISS1::ENSG00000170498.7	0	-	204165114	204166114	0	2	387,500,	0,500,
chr1	204182720	204183720	gencode::GOLT1A::ENSG00000174567.7	0	-	204182720	204183720	0	2	287,500,	0,500,
chr1	204328544	204329544	gencode::PLEKHA6::ENSG00000143850.8	0	-	204328544	204329544	0	2	275,500,	0,500,
chr1	204380919	204381419	gencode::PPP1R15B::ENSG00000158615.8	0	-	204380919	204381419	0	1	500,	0,
chr1	204459061	204460052	gencode::PIK3C2B::ENSG00000133056.9	0	-	204459061	204460052	0	2	132,500,	0,491,
chr1	204485010	204495146	gencode::MDM4::ENSG00000198625.8	0	+	204485010	204495146	0	4	500,479,492,420,	0,629,9107,9716,
chr1	204591333	204655361	gencode::LRRN2::ENSG00000170382.7	0	-	204591333	204655361	0	3	500,464,500,	0,62648,63528,
chr1	204797281	204913878	gencode::NFASC::ENSG00000163531.11	0	+	204797281	204913878	0	8	500,410,500,275,498,389,498,342,	0,631,42177,42902,91978,92589,115572,116255,
chr1	205011824	205012824	gencode::CNTN2::ENSG00000184144.5	0	+	205011824	205012824	0	2	500,300,	0,700,
chr1	205053645	205054145	gencode::TMEM81::ENSG00000174529.6	0	-	205053645	205054145	0	1	500,	0,
chr1	205090643	205091643	gencode::RBBP5::ENSG00000117222.9	0	-	205090643	205091643	0	2	337,500,	0,500,
chr1	205180194	205181227	gencode::DSTYK::ENSG00000133059.12	0	-	205180194	205181227	0	2	202,500,	0,533,
chr1	205196803	205225828	gencode::TMCC2::ENSG00000133069.10	0	+	205196803	205225828	0	7	500,157,300,500,426,500,282,	0,1098,1455,18444,19018,28025,28743,
chr1	205290383	205291383	gencode::NUAK2::ENSG00000163545.7	0	-	205290383	205291383	0	2	140,500,	0,500,
chr1	205312923	205326666	gencode::KLHDC8A::ENSG00000162873.10	0	-	205312923	205326666	0	5	336,222,452,74,500,	0,665,12283,13116,13243,
chr1	205389202	205419559	gencode::LEMD1::ENSG00000186007.5	0	-	205389202	205419559	0	6	378,498,433,500,434,500,	0,502,1480,2012,29357,29857,
chr1	205473222	205474226	gencode::CDK18::ENSG00000117266.11	0	+	205473222	205474226	0	2	500,218,	0,786,
chr1	205537604	205538684	gencode::MFSD4::ENSG00000174514.8	0	+	205537604	205538684	0	2	500,255,	0,825,
chr1	205600590	205601590	gencode::ELK4::ENSG00000158711.9	0	-	205600590	205601590	0	2	167,500,	0,500,
chr1	205649087	205650087	gencode::SLC45A3::ENSG00000158715.5	0	-	205649087	205650087	0	2	432,500,	0,500,
chr1	205718904	205719904	gencode::NUCKS1::ENSG00000069275.12	0	-	205718904	205719904	0	2	178,500,	0,500,
chr1	205743861	205745087	gencode::RAB7L1::ENSG00000117280.8	0	-	205743861	205745087	0	2	97,500,	0,726,
chr1	205781804	205782804	gencode::SLC41A1::ENSG00000133065.6	0	-	205781804	205782804	0	2	129,500,	0,500,
chr1	205818745	205819745	gencode::PM20D1::ENSG00000162877.8	0	-	205818745	205819745	0	2	284,500,	0,500,
chr1	205904450	205913088	gencode::SLC26A9::ENSG00000174502.14	0	-	205904450	205913088	0	4	371,482,402,500,	0,518,7638,8138,
chr1	206136736	206138456	gencode::FAM72A::ENSG00000196550.6	0	+	206136736	206138456	0	3	500,276,306,	0,752,1414,
chr1	206223475	206223975	gencode::AVPR1B::ENSG00000198049.5	0	+	206223475	206223975	0	1	500,	0,
chr1	206288647	206289147	gencode::C1orf186::ENSG00000196533.6	0	-	206288647	206289147	0	1	500,	0,
chr1	206316958	206318105	gencode::CTSE::ENSG00000196188.6	0	+	206316958	206318105	0	2	500,459,	0,688,
chr1	206556865	206557867	gencode::SRGAP2::ENSG00000163486.8	0	+	206556865	206557867	0	2	500,434,	0,568,
chr1	206643290	206644337	gencode::IKBKE::ENSG00000143466.9	0	+	206643290	206644337	0	2	500,294,	0,753,
chr1	206670561	206671561	gencode::C1orf147::ENSG00000162888.4	0	-	206670561	206671561	0	2	363,500,	0,500,
chr1	206680378	206730492	gencode::RASSF5::ENSG00000136653.15	0	+	206680378	206730492	0	2	500,500,	0,49614,
chr1	206785312	206786404	gencode::EIF2D::ENSG00000143486.11	0	-	206785312	206786404	0	2	325,500,	0,592,
chr1	206808380	206809673	gencode::DYRK3::ENSG00000143479.11	0	+	206808380	206809673	0	3	500,46,102,	0,747,1191,
chr1	206857788	206858881	gencode::MAPKAPK2::ENSG00000162889.6	0	+	206857788	206858881	0	2	500,26,	0,1067,
chr1	206945339	206946339	gencode::IL10::ENSG00000136634.5	0	-	206945339	206946339	0	2	274,500,	0,500,
chr1	206971714	207002721	gencode::IL19::ENSG00000142224.11	0	+	206971714	207002721	0	4	500,361,500,248,	0,639,30007,30759,
chr1	207038198	207039641	gencode::IL20::ENSG00000162891.6	0	+	207038198	207039641	0	3	500,120,283,	0,835,1160,
chr1	207070287	207071288	gencode::IL24::ENSG00000162892.11	0	+	207070287	207071288	0	3	500,111,65,	0,675,936,
chr1	207094712	207095843	gencode::FAIM3::ENSG00000162894.7	0	-	207094712	207095843	0	2	448,500,	0,631,
chr1	207119311	207120311	gencode::PIGR::ENSG00000162896.5	0	-	207119311	207120311	0	2	367,500,	0,500,
chr1	207142994	207144470	gencode::FCAMR::ENSG00000162897.10	0	-	207142994	207144470	0	2	435,500,	0,976,
chr1	207205592	207206601	gencode::C1orf116::ENSG00000182795.12	0	-	207205592	207206601	0	2	329,500,	0,509,
chr1	207223070	207238848	gencode::PFKFB2::ENSG00000123836.10	0	+	207223070	207238848	0	8	230,102,279,442,499,395,500,341,	0,3034,3255,3643,4474,5079,14778,15437,
chr1	207223922	207226825	gencode::YOD1::ENSG00000180667.6	0	-	207223922	207226825	0	6	108,500,447,536,279,112,	0,500,1158,1748,2403,2791,
chr1	207261686	207263386	gencode::C4BPB::ENSG00000123843.8	0	+	207261686	207263386	0	3	500,289,450,	0,607,1250,
chr1	207277106	207278106	gencode::C4BPA::ENSG00000123838.6	0	+	207277106	207278106	0	2	500,329,	0,671,
chr1	207494352	207495592	gencode::CD55::ENSG00000196352.9	0	+	207494352	207495592	0	2	500,380,	0,860,
chr1	207627074	207628209	gencode::CR2::ENSG00000117322.12	0	+	207627074	207628209	0	2	500,386,	0,749,
chr1	207669001	207670112	gencode::CR1::ENSG00000203710.6	0	+	207669001	207670112	0	2	500,377,	0,734,
chr1	207818018	207819018	gencode::CR1L::ENSG00000197721.12	0	+	207818018	207819018	0	2	500,341,	0,659,
chr1	207924901	207925967	gencode::CD46::ENSG00000117335.14	0	+	207924901	207925967	0	2	500,311,	0,755,
chr1	208063837	208085247	gencode::CD34::ENSG00000174059.12	0	-	208063837	208085247	0	3	500,383,500,	0,20124,20910,
chr1	208417665	208418165	gencode::PLXNA2::ENSG00000076356.6	0	-	208417665	208418165	0	1	500,	0,
chr1	209756561	209757573	gencode::CAMK1G::ENSG00000008118.5	0	+	209756561	209757573	0	2	500,294,	0,718,
chr1	209824179	209826311	gencode::LAMB3::ENSG00000196878.8	0	-	209824179	209826311	0	4	80,912,37,500,	0,500,1495,1632,
chr1	209848264	209848995	gencode::G0S2::ENSG00000123689.5	0	+	209848264	209848995	0	2	500,99,	0,632,
chr1	209859009	209878690	gencode::HSD11B1::ENSG00000117594.5	0	+	209859009	209878690	0	4	500,417,500,313,	0,623,18681,19368,
chr1	209928876	209942459	gencode::TRAF3IP3::ENSG00000009790.10	0	+	209928876	209942459	0	8	500,367,500,141,440,153,500,452,	0,780,2466,3325,4008,4855,12456,13131,
chr1	209957404	209958404	gencode::C1orf74::ENSG00000162757.3	0	-	209957404	209958404	0	2	316,500,	0,500,
chr1	209978889	209979965	gencode::IRF6::ENSG00000117595.6	0	-	209978889	209979965	0	2	400,500,	0,576,
chr1	210000851	210001851	gencode::DIEXF::ENSG00000117597.13	0	+	210000851	210001851	0	2	500,334,	0,666,
chr1	210111037	210126397	gencode::SYT14::ENSG00000143469.12	0	+	210111037	210126397	0	4	500,471,498,294,	0,587,14516,15066,
chr1	210405643	210406643	gencode::SERTAD4::ENSG00000082497.7	0	+	210405643	210406643	0	2	500,285,	0,715,
chr1	210501095	210613426	gencode::HHAT::ENSG00000054392.8	0	+	210501095	210613426	0	6	500,519,193,314,500,327,	0,635,1355,1734,111331,112004,
chr1	211306815	211307957	gencode::KCNH1::ENSG00000143473.7	0	-	211306815	211307957	0	2	391,500,	0,642,
chr1	211432120	211433816	gencode::RCOR3::ENSG00000117625.9	0	+	211432120	211433816	0	3	500,246,308,	0,950,1388,
chr1	211499456	211520205	gencode::TRAF5::ENSG00000082512.10	0	+	211499456	211520205	0	5	500,151,445,500,439,	0,561,777,19749,20310,
chr1	211666259	211666759	gencode::RD3::ENSG00000198570.5	0	-	211666259	211666759	0	1	500,	0,
chr1	211752084	211752584	gencode::SLC30A1::ENSG00000170385.9	0	-	211752084	211752584	0	1	500,	0,
chr1	211848399	211849460	gencode::NEK2::ENSG00000117650.8	0	-	211848399	211849460	0	2	324,500,	0,561,
chr1	212003580	212004614	gencode::LPGAT1::ENSG00000123684.8	0	-	212003580	212004614	0	2	332,500,	0,534,
chr1	212208362	212209384	gencode::INTS7::ENSG00000143493.8	0	-	212208362	212209384	0	3	321,34,98,	0,522,924,
chr1	212208418	212209591	gencode::DTL::ENSG00000143476.13	0	+	212208418	212209591	0	3	265,34,305,	0,466,868,
chr1	212458378	212475647	gencode::PPP2R5A::ENSG00000066027.7	0	+	212458378	212475647	0	3	500,500,211,	0,16269,17058,
chr1	212587737	212588743	gencode::TMEM206::ENSG00000065600.8	0	-	212587737	212588743	0	2	324,500,	0,506,
chr1	212605728	212606728	gencode::NENF::ENSG00000117691.5	0	+	212605728	212606728	0	2	500,264,	0,736,
chr1	212738196	212788863	gencode::ATF3::ENSG00000162772.12	0	+	212738196	212788863	0	6	500,369,500,482,494,258,	0,631,43315,44078,49667,50409,
chr1	212797288	212797788	gencode::FAM71A::ENSG00000162771.6	0	+	212797288	212797788	0	1	500,	0,
chr1	212872827	212873827	gencode::BATF3::ENSG00000123685.4	0	-	212872827	212873827	0	2	185,500,	0,500,
chr1	212964423	212965624	gencode::NSL1::ENSG00000117697.10	0	-	212964423	212965624	0	3	446,45,293,	0,701,908,
chr1	212964669	212965747	gencode::TATDN3::ENSG00000203705.6	0	+	212964669	212965747	0	3	200,45,416,	0,455,662,
chr1	213020491	213021491	gencode::C1orf227::ENSG00000185523.6	0	-	213020491	213021491	0	2	428,500,	0,500,
chr1	213031096	213031596	gencode::FLVCR1::ENSG00000162769.8	0	+	213031096	213031596	0	1	500,	0,
chr1	213123361	213125384	gencode::VASH2::ENSG00000143494.11	0	+	213123361	213125384	0	3	500,594,222,	0,723,1801,
chr1	213188320	213189668	gencode::ANGEL2::ENSG00000174606.8	0	-	213188320	213189668	0	3	168,132,500,	0,500,848,
chr1	213224088	213225103	gencode::RPS6KC1::ENSG00000136643.7	0	+	213224088	213225103	0	2	500,250,	0,765,
chr1	214160773	214169809	gencode::PROX1::ENSG00000117707.11	0	+	214160773	214169809	0	3	500,293,431,	0,1293,8605,
chr1	214454075	214455075	gencode::SMYD2::ENSG00000143499.9	0	+	214454075	214455075	0	2	500,303,	0,697,
chr1	214637646	214725066	gencode::PTPN14::ENSG00000152104.7	0	-	214637646	214725066	0	4	324,344,457,500,	0,656,86420,86920,
chr1	214776037	214777037	gencode::CENPF::ENSG00000117724.8	0	+	214776037	214777037	0	2	500,371,	0,629,
chr1	215178697	215257078	gencode::KCNK2::ENSG00000082482.9	0	+	215178697	215257078	0	4	500,397,500,302,	0,603,77269,78079,
chr1	215740234	215741234	gencode::KCTD3::ENSG00000136636.8	0	+	215740234	215741234	0	2	500,121,	0,879,
chr1	216596238	216597238	gencode::USH2A::ENSG00000042781.8	0	-	216596238	216597238	0	2	315,500,	0,500,
chr1	216896295	217311597	gencode::ESRRG::ENSG00000196482.12	0	-	216896295	217311597	0	12	288,500,73,500,409,498,460,500,399,500,410,500,	0,500,81914,82414,216217,216722,353436,353978,366152,366681,414301,414802,
chr1	217803924	217804924	gencode::GPATCH2::ENSG00000092978.6	0	-	217803924	217804924	0	3	331,241,134,	0,500,866,
chr1	217804165	217805165	gencode::SPATA17::ENSG00000162814.6	0	+	217804165	217805165	0	3	90,241,375,	0,259,625,
chr1	218458128	218459128	gencode::RRP15::ENSG00000067533.5	0	+	218458128	218459128	0	2	500,329,	0,671,
chr1	218519076	218519576	gencode::TGFB2::ENSG00000092969.7	0	+	218519076	218519576	0	1	500,	0,
chr1	218682937	218683937	gencode::C1orf143::ENSG00000228208.2	0	+	218682937	218683937	0	2	500,406,	0,594,
chr1	219346685	219347716	gencode::LYPLAL1::ENSG00000143353.7	0	+	219346685	219347716	0	2	500,391,	0,640,
chr1	220101993	220132489	gencode::SLC30A10::ENSG00000196660.6	0	-	220101993	220132489	0	3	500,418,500,	0,29496,29996,
chr1	220219500	220220500	gencode::EPRS::ENSG00000136628.13	0	-	220219500	220220500	0	2	182,500,	0,500,
chr1	220262614	220264304	gencode::BPNT1::ENSG00000162813.13	0	-	220262614	220264304	0	3	369,331,500,	0,681,1190,
chr1	220266943	220267954	gencode::IARS2::ENSG00000067704.8	0	+	220266943	220267954	0	2	500,127,	0,884,
chr1	220445296	220446296	gencode::RAB3GAP2::ENSG00000118873.11	0	-	220445296	220446296	0	2	266,500,	0,500,
chr1	220607523	220608523	gencode::AC096644.1::ENSG00000224867.2	0	-	220607523	220608523	0	3	157,269,500,	0,189,500,
chr1	220701067	220702398	gencode::MARK1::ENSG00000116141.11	0	+	220701067	220702398	0	2	500,181,	0,1150,
chr1	220862686	220863186	gencode::C1orf115::ENSG00000162817.6	0	+	220862686	220863186	0	1	500,	0,
chr1	220921110	220922175	gencode::MARC2::ENSG00000117791.11	0	+	220921110	220922175	0	2	500,28,	0,1037,
chr1	220959600	220960600	gencode::MARC1::ENSG00000186205.8	0	+	220959600	220960600	0	2	500,37,	0,963,
chr1	221051198	221054533	gencode::HLX::ENSG00000136630.11	0	+	221051198	221054533	0	2	500,450,	0,2885,
chr1	221910802	221916018	gencode::DUSP10::ENSG00000143507.13	0	-	221910802	221916018	0	3	500,359,500,	0,4159,4716,
chr1	222720945	222721945	gencode::HHIPL2::ENSG00000143512.8	0	-	222720945	222721945	0	2	118,500,	0,500,
chr1	222762627	222763775	gencode::TAF1A::ENSG00000143498.13	0	-	222762627	222763775	0	2	439,500,	0,648,
chr1	222790927	222818144	gencode::MIA3::ENSG00000154305.12	0	+	222790927	222818144	0	4	500,362,500,214,	0,660,26217,27003,
chr1	222885270	222887026	gencode::AIDA::ENSG00000186063.8	0	-	222885270	222887026	0	4	277,28,191,266,	0,596,1256,1490,
chr1	222885394	222887236	gencode::BROX::ENSG00000162819.7	0	+	222885394	222887236	0	4	153,28,191,476,	0,472,1132,1366,
chr1	222910057	222911148	gencode::FAM177B::ENSG00000197520.6	0	+	222910057	222911148	0	2	500,482,	0,609,
chr1	223045112	223102265	gencode::DISP1::ENSG00000154309.7	0	+	223045112	223102265	0	4	500,336,500,351,	0,664,56153,56802,
chr1	223307598	223311129	gencode::TLR5::ENSG00000187554.7	0	-	223307598	223311129	0	5	130,195,390,388,500,	0,228,610,2531,3031,
chr1	223537544	223538044	gencode::SUSD4::ENSG00000143502.10	0	-	223537544	223538044	0	1	500,	0,
chr1	223566214	223566714	gencode::C1orf65::ENSG00000178395.5	0	+	223566214	223566714	0	1	500,	0,
chr1	223852848	223853925	gencode::CAPN8::ENSG00000203697.7	0	-	223852848	223853925	0	2	261,500,	0,577,
chr1	223888794	223900033	gencode::CAPN2::ENSG00000162909.13	0	+	223888794	223900033	0	3	500,259,500,	0,741,10739,
chr1	223987928	224034174	gencode::TP53BP2::ENSG00000143514.12	0	-	223987928	224034174	0	4	471,414,221,500,	0,586,45204,45746,
chr1	224215871	224216871	gencode::AC138393.1::ENSG00000269358.1	0	-	224215871	224216871	0	3	142,304,500,	0,171,500,
chr1	224301288	224302312	gencode::FBXO28::ENSG00000143756.7	0	+	224301288	224302312	0	2	500,212,	0,812,
chr1	224370372	224371467	gencode::DEGS1::ENSG00000143753.8	0	+	224370372	224371467	0	2	500,345,	0,750,
chr1	224517340	224518589	gencode::NVL::ENSG00000143748.13	0	-	224517340	224518589	0	2	430,500,	0,749,
chr1	224544051	224545094	gencode::CNIH4::ENSG00000143771.7	0	+	224544051	224545094	0	2	500,397,	0,646,
chr1	224621307	224622501	gencode::WDR26::ENSG00000162923.10	0	-	224621307	224622501	0	2	76,500,	0,694,
chr1	224803494	224803994	gencode::CNIH3::ENSG00000143786.3	0	+	224803494	224803994	0	1	500,	0,
chr1	225083463	225140904	gencode::DNAH14::ENSG00000185842.10	0	+	225083463	225140904	0	6	500,394,360,344,498,421,	0,606,33392,34076,56408,57020,
chr1	225599903	225600403	gencode::AC092811.1::ENSG00000203691.2	0	+	225599903	225600403	0	2	250,54,	0,446,
chr1	225615237	225617019	gencode::LBR::ENSG00000143815.10	0	-	225615237	225617019	0	3	416,668,500,	0,500,1282,
chr1	225839918	225841344	gencode::ENAH::ENSG00000154380.12	0	-	225839918	225841344	0	2	467,500,	0,926,
chr1	225965030	225966136	gencode::SRP9::ENSG00000143742.8	0	+	225965030	225966136	0	2	500,420,	0,686,
chr1	225997296	226013554	gencode::EPHX1::ENSG00000143819.8	0	+	225997296	226013554	0	4	500,423,500,307,	0,577,15258,15951,
chr1	226053948	226070569	gencode::TMEM63A::ENSG00000196187.7	0	-	226053948	226070569	0	5	323,361,83,432,500,	0,500,917,15621,16121,
chr1	226076346	226077346	gencode::LEFTY1::ENSG00000243709.1	0	-	226076346	226077346	0	2	168,500,	0,500,
chr1	226111473	226112459	gencode::PYCR2::ENSG00000143811.12	0	-	226111473	226112459	0	2	268,481,	0,505,
chr1	226111478	226112478	gencode::RP4-559A3.7::ENSG00000255835.1	0	-	226111478	226112478	0	2	263,500,	0,500,
chr1	226128583	226129689	gencode::LEFTY2::ENSG00000143768.7	0	-	226128583	226129689	0	2	5,500,	0,606,
chr1	226186532	226187532	gencode::SDE2::ENSG00000143751.9	0	-	226186532	226187532	0	2	359,500,	0,500,
chr1	226249051	226251677	gencode::H3F3A::ENSG00000163041.5	0	+	226249051	226251677	0	4	500,581,400,500,	0,746,1463,2126,
chr1	226373931	226374931	gencode::ACBD3::ENSG00000182827.8	0	-	226373931	226374931	0	2	157,500,	0,500,
chr1	226410818	226411818	gencode::MIXL1::ENSG00000185155.7	0	+	226410818	226411818	0	2	500,41,	0,959,
chr1	226496455	226497934	gencode::LIN9::ENSG00000183814.11	0	-	226496455	226497934	0	2	352,500,	0,979,
chr1	226595183	226596280	gencode::PARP1::ENSG00000143799.8	0	-	226595183	226596280	0	2	325,500,	0,597,
chr1	226736000	226737000	gencode::C1orf95::ENSG00000203685.5	0	+	226736000	226737000	0	2	500,191,	0,809,
chr1	226925366	226927524	gencode::ITPKB::ENSG00000143772.5	0	-	226925366	226927524	0	3	293,375,500,	0,998,1658,
chr1	227057763	227072823	gencode::PSEN2::ENSG00000143801.12	0	+	227057763	227072823	0	7	500,608,361,321,419,500,438,	0,589,1344,10083,10664,14060,14622,
chr1	227084736	227153881	gencode::ADCK3::ENSG00000163050.12	0	+	227084736	227153881	0	5	500,500,392,256,441,	0,42750,43366,68377,68704,
chr1	227504383	227506675	gencode::CDC42BPA::ENSG00000143776.14	0	-	227504383	227506675	0	2	320,500,	0,1792,
chr1	227750743	227751743	gencode::ZNF678::ENSG00000181450.13	0	+	227750743	227751743	0	2	500,316,	0,684,
chr1	227915857	227922696	gencode::SNAP47::ENSG00000143740.10	0	+	227915857	227922696	0	4	500,368,153,177,	0,632,6339,6662,
chr1	227922612	227923612	gencode::JMJD4::ENSG00000081692.8	0	-	227922612	227923612	0	2	84,410,	0,590,
chr1	228002893	228003788	gencode::PRSS38::ENSG00000185888.5	0	+	228002893	228003788	0	2	500,221,	0,674,
chr1	228135099	228136099	gencode::WNT9A::ENSG00000143816.7	0	-	228135099	228136099	0	2	392,500,	0,500,
chr1	228194251	228195282	gencode::WNT3A::ENSG00000154342.4	0	+	228194251	228195282	0	2	500,380,	0,651,
chr1	228269860	228271350	gencode::ARF1::ENSG00000143761.9	0	+	228269860	228271350	0	3	500,297,273,	0,693,1217,
chr1	228290752	228291663	gencode::C1orf35::ENSG00000143793.8	0	-	228290752	228291663	0	2	80,500,	0,411,
chr1	228295843	228297513	gencode::MRPL55::ENSG00000162910.14	0	-	228295843	228297513	0	3	90,91,500,	0,913,1170,
chr1	228327162	228333654	gencode::GUK1::ENSG00000143774.12	0	+	228327162	228333654	0	7	500,66,466,500,73,500,302,	0,700,904,4366,5293,5492,6190,
chr1	228337052	228338052	gencode::GJC2::ENSG00000198835.3	0	+	228337052	228338052	0	2	500,342,	0,658,
chr1	228352713	228353515	gencode::IBA57-AS1::ENSG00000203684.5	0	-	228352713	228353515	0	2	459,302,	0,500,
chr1	228353015	228362750	gencode::IBA57::ENSG00000181873.8	0	+	228353015	228362750	0	6	157,302,155,500,77,18,	0,198,845,8735,9298,9717,
chr1	228395330	228444850	gencode::OBSCN::ENSG00000154358.15	0	+	228395330	228444850	0	4	500,472,499,221,	0,558,48520,49299,
chr1	228400861	228401861	gencode::C1orf145::ENSG00000162913.9	0	-	228400861	228401861	0	2	259,448,	0,552,
chr1	228593605	228595041	gencode::TRIM11::ENSG00000154370.9	0	-	228593605	228595041	0	2	247,500,	0,936,
chr1	228603730	228604958	gencode::TRIM17::ENSG00000162931.7	0	-	228603730	228604958	0	2	355,500,	0,728,
chr1	228612526	228613526	gencode::HIST3H3::ENSG00000168148.3	0	-	228612526	228613526	0	2	19,500,	0,500,
chr1	228645060	228645807	gencode::HIST3H2A::ENSG00000181218.4	0	-	228645060	228645807	0	2	4,247,	0,500,
chr1	228645560	228646307	gencode::HIST3H2BB::ENSG00000196890.3	0	+	228645560	228646307	0	2	247,48,	0,699,
chr1	228674261	228674761	gencode::RNF187::ENSG00000168159.9	0	+	228674261	228674761	0	1	500,	0,
chr1	228870323	228870823	gencode::RHOU::ENSG00000116574.4	0	+	228870323	228870823	0	1	500,	0,
chr1	229384882	229385382	gencode::TMEM78::ENSG00000177800.2	0	+	229384882	229385382	0	1	500,	0,
chr1	229406378	229407378	gencode::RAB4A::ENSG00000168118.7	0	+	229406378	229407378	0	2	500,259,	0,741,
chr1	229475880	229479235	gencode::CCSAP::ENSG00000154429.6	0	-	229475880	229479235	0	5	265,500,79,392,500,	0,500,1884,2384,2855,
chr1	229569341	229570345	gencode::ACTA1::ENSG00000143632.10	0	-	229569341	229570345	0	2	407,500,	0,504,
chr1	229643573	229644603	gencode::NUP133::ENSG00000069248.9	0	-	229643573	229644603	0	2	239,500,	0,530,
chr1	229694442	229694942	gencode::ABCB10::ENSG00000135776.4	0	-	229694442	229694942	0	1	500,	0,
chr1	229749729	229762294	gencode::TAF5L::ENSG00000135801.5	0	-	229749729	229762294	0	5	174,495,412,186,189,	0,505,11488,12065,12376,
chr1	229761480	229762480	gencode::URB2::ENSG00000135763.5	0	+	229761480	229762480	0	3	149,186,375,	0,314,625,
chr1	230193035	230203517	gencode::GALNT2::ENSG00000143641.8	0	+	230193035	230203517	0	4	500,208,500,362,	0,792,9420,10120,
chr1	230512867	230561975	gencode::PGBD5::ENSG00000177614.5	0	-	230512867	230561975	0	4	374,500,366,500,	0,524,48108,48608,
chr1	230777737	230814875	gencode::COG2::ENSG00000135775.9	0	+	230777737	230814875	0	6	500,130,268,500,131,75,	0,689,1051,36138,36788,37063,
chr1	230849543	230850543	gencode::AGT::ENSG00000135744.7	0	-	230849543	230850543	0	2	286,500,	0,500,
chr1	230882629	230883678	gencode::CAPN9::ENSG00000135773.8	0	+	230882629	230883678	0	2	500,221,	0,828,
chr1	230991282	231005835	gencode::C1orf198::ENSG00000119280.12	0	-	230991282	231005835	0	8	129,155,500,24,156,128,163,500,	0,184,500,12617,13117,13381,13780,14053,
chr1	231114084	231115107	gencode::TTC13::ENSG00000143643.8	0	-	231114084	231115107	0	3	219,187,80,	0,523,943,
chr1	231114294	231115339	gencode::ARV1::ENSG00000173409.9	0	+	231114294	231115339	0	3	9,187,312,	0,313,733,
chr1	231175492	231176492	gencode::FAM89A::ENSG00000182118.5	0	-	231175492	231176492	0	2	172,500,	0,500,
chr1	231297357	231297857	gencode::TRIM67::ENSG00000119283.11	0	+	231297357	231297857	0	1	500,	0,
chr1	231376413	231377424	gencode::C1orf131::ENSG00000143633.8	0	-	231376413	231377424	0	3	354,31,220,	0,511,791,
chr1	231376455	231377457	gencode::GNPAT::ENSG00000116906.7	0	+	231376455	231377457	0	3	312,31,253,	0,469,749,
chr1	231474352	231474501	gencode::SPRTN::ENSG00000010072.11	0	+	231474352	231474501	0	1	149,	0,
chr1	231560790	231561290	gencode::EGLN1::ENSG00000135766.8	0	-	231560790	231561290	0	1	500,	0,
chr1	231663898	231664898	gencode::TSNAX::ENSG00000116918.9	0	+	231663898	231664898	0	2	500,324,	0,676,
chr1	231762060	231763060	gencode::DISC1::ENSG00000162946.16	0	+	231762060	231763060	0	2	500,378,	0,622,
chr1	232597663	232697804	gencode::SIPA1L2::ENSG00000116991.6	0	-	232597663	232697804	0	5	273,500,456,408,500,	0,500,53693,99141,99641,
chr1	232940142	232940642	gencode::MAP10::ENSG00000212916.3	0	+	232940142	232940642	0	1	500,	0,
chr1	233085869	233086885	gencode::NTPCR::ENSG00000135778.7	0	+	233085869	233086885	0	2	500,393,	0,623,
chr1	233194264	233431959	gencode::PCNXL2::ENSG00000135749.14	0	-	233194264	233431959	0	6	500,309,95,401,110,500,	0,159069,159415,159668,236695,237195,
chr1	233463013	233512028	gencode::MLK4::ENSG00000143674.6	0	+	233463013	233512028	0	3	500,500,214,	0,48015,48801,
chr1	233749249	233765852	gencode::KCNK1::ENSG00000135750.10	0	+	233749249	233765852	0	3	500,500,190,	0,15603,16413,
chr1	234040178	234350516	gencode::SLC35F3::ENSG00000183780.8	0	+	234040178	234350516	0	4	500,300,500,194,	0,700,309338,310144,
chr1	234508701	234509428	gencode::COA6::ENSG00000168275.10	0	+	234508701	234509428	0	2	500,2,	0,725,
chr1	234614849	234615349	gencode::TARBP1::ENSG00000059588.5	0	-	234614849	234615349	0	1	500,	0,
chr1	234745271	234745771	gencode::IRF2BP2::ENSG00000168264.6	0	-	234745271	234745771	0	1	500,	0,
chr1	235291751	235292751	gencode::TOMM20::ENSG00000173726.6	0	-	235291751	235292751	0	2	156,500,	0,500,
chr1	235324071	235325272	gencode::RBM34::ENSG00000188739.10	0	-	235324071	235325272	0	3	134,102,500,	0,313,701,
chr1	235490164	235492330	gencode::GGPS1::ENSG00000152904.7	0	+	235490164	235492330	0	6	62,187,266,218,69,235,	0,121,651,1370,1651,1931,
chr1	235490302	235491884	gencode::ARID4B::ENSG00000054267.16	0	-	235490302	235491884	0	4	170,266,218,69,	0,513,1232,1513,
chr1	235530174	235531244	gencode::TBCE::ENSG00000116957.8	0	+	235530174	235531244	0	2	500,375,	0,695,
chr1	235667222	235668281	gencode::B3GALNT2::ENSG00000162885.8	0	-	235667222	235668281	0	2	216,500,	0,559,
chr1	235758279	235814554	gencode::GNG4::ENSG00000168243.6	0	-	235758279	235814554	0	5	418,466,166,553,500,	0,534,54514,55014,55775,
chr1	236029720	236047372	gencode::LYST::ENSG00000143669.9	0	-	236029720	236047372	0	4	414,500,112,500,	0,500,16652,17152,
chr1	236227909	236228962	gencode::NID1::ENSG00000116962.10	0	-	236227909	236228962	0	2	243,500,	0,553,
chr1	236305331	236306343	gencode::GPR137B::ENSG00000077585.9	0	+	236305331	236306343	0	2	500,5,	0,1007,
chr1	236444785	236445819	gencode::ERO1LB::ENSG00000086619.9	0	-	236444785	236445819	0	2	194,500,	0,534,
chr1	236557077	236559215	gencode::EDARADD::ENSG00000186197.8	0	+	236557077	236559215	0	4	500,270,500,253,	0,730,1138,1885,
chr1	236681038	236689870	gencode::LGALS8::ENSG00000116977.14	0	+	236681038	236689870	0	8	500,135,270,448,517,338,395,453,	0,548,764,5200,6325,7004,7832,8379,
chr1	236767429	236768304	gencode::HEATR1::ENSG00000119285.6	0	-	236767429	236768304	0	2	290,500,	0,375,
chr1	236849253	236895049	gencode::ACTN2::ENSG00000077522.8	0	+	236849253	236895049	0	4	500,206,481,433,	0,848,44796,45363,
chr1	236958109	236959481	gencode::MTR::ENSG00000116984.8	0	+	236958109	236959481	0	2	500,442,	0,930,
chr1	237167218	237168218	gencode::MT1HL1::ENSG00000244020.2	0	-	237167218	237168218	0	2	184,500,	0,500,
chr1	237205004	237434296	gencode::RYR2::ENSG00000198626.11	0	+	237205004	237434296	0	7	500,133,500,464,316,171,378,	0,867,225395,225931,228292,228619,228914,
chr1	238053594	238054594	gencode::ZP4::ENSG00000116996.5	0	-	238053594	238054594	0	2	164,500,	0,500,
chr1	238108575	238109075	gencode::MTRNR2L11::ENSG00000270188.1	0	-	238108575	238109075	0	1	500,	0,
chr1	239791872	239792872	gencode::CHRM3::ENSG00000133019.7	0	+	239791872	239792872	0	2	500,31,	0,969,
chr1	240254679	240620781	gencode::FMN2::ENSG00000155816.15	0	+	240254679	240620781	0	4	500,500,223,500,	0,153411,154188,365602,
chr1	240643004	240644004	gencode::AL646016.1::ENSG00000268365.1	0	-	240643004	240644004	0	2	472,500,	0,500,
chr1	240774949	240775949	gencode::GREM2::ENSG00000180875.4	0	-	240774949	240775949	0	2	232,500,	0,500,
chr1	241307368	241521030	gencode::RGS7::ENSG00000182901.11	0	-	241307368	241521030	0	8	369,500,363,500,420,448,481,500,	0,500,64150,64650,211208,211760,212347,213162,
chr1	241682561	241683561	gencode::FH::ENSG00000091483.6	0	-	241682561	241683561	0	2	327,500,	0,500,
chr1	241694933	241696204	gencode::KMO::ENSG00000117009.7	0	+	241694933	241696204	0	2	500,404,	0,867,
chr1	241799232	241799732	gencode::CHML::ENSG00000203668.1	0	-	241799232	241799732	0	1	500,	0,
chr1	241803163	241804201	gencode::OPN3::ENSG00000054277.8	0	-	241803163	241804201	0	2	18,500,	0,538,
chr1	241815079	241816079	gencode::WDR64::ENSG00000162843.13	0	+	241815079	241816079	0	2	500,146,	0,854,
chr1	242010981	242012632	gencode::EXO1::ENSG00000174371.12	0	+	242010981	242012632	0	4	500,373,80,112,	0,676,1350,1539,
chr1	242161924	242162875	gencode::MAP1LC3C::ENSG00000197769.5	0	-	242161924	242162875	0	3	151,115,500,	0,211,451,
chr1	242612284	242688498	gencode::PLD5::ENSG00000180287.12	0	-	242612284	242688498	0	5	369,500,67,76,500,	0,500,75036,75536,75714,
chr1	243320123	243419123	gencode::CEP170::ENSG00000143702.11	0	-	243320123	243419123	0	5	500,452,500,487,500,	0,5997,6497,97729,98500,
chr1	243387557	243388475	gencode::AC092782.1::ENSG00000269795.1	0	+	243387557	243388475	0	2	500,371,	0,547,
chr1	243418819	243419871	gencode::SDCCAG8::ENSG00000054282.11	0	+	243418819	243419871	0	2	500,327,	0,725,
chr1	244006038	244013930	gencode::AKT3::ENSG00000117020.12	0	-	244006038	244013930	0	5	386,257,500,409,500,	0,548,848,6892,7392,
chr1	244214084	244215084	gencode::ZBTB18::ENSG00000179456.9	0	+	244214084	244215084	0	2	500,336,	0,664,
chr1	244227131	244227631	gencode::AL590483.1::ENSG00000268146.1	0	+	244227131	244227631	0	1	500,	0,
chr1	244515436	244516436	gencode::C1orf100::ENSG00000173728.6	0	+	244515436	244516436	0	2	500,398,	0,602,
chr1	244615436	244615936	gencode::ADSS::ENSG00000035687.9	0	-	244615436	244615936	0	1	500,	0,
chr1	244624177	244625212	gencode::C1orf101::ENSG00000179397.13	0	+	244624177	244625212	0	2	500,414,	0,621,
chr1	244815736	244816904	gencode::DESI2::ENSG00000121644.14	0	+	244815736	244816904	0	2	500,245,	0,923,
chr1	244998123	244999417	gencode::COX20::ENSG00000203667.5	0	+	244998123	244999417	0	2	500,357,	0,937,
chr1	245027844	245028344	gencode::HNRNPU::ENSG00000153187.12	0	-	245027844	245028344	0	1	500,	0,
chr1	245134390	245134890	gencode::RP11-156E8.1::ENSG00000272195.1	0	-	245134390	245134890	0	1	500,	0,
chr1	245317786	245674803	gencode::KIF26B::ENSG00000162849.11	0	+	245317786	245674803	0	3	500,500,371,	0,356017,356646,
chr1	246580214	246671114	gencode::SMYD3::ENSG00000185420.14	0	-	246580214	246671114	0	4	381,500,334,500,	0,500,89805,90400,
chr1	246729063	246730126	gencode::TFB2M::ENSG00000162851.6	0	-	246729063	246730126	0	3	62,121,33,	0,563,1030,
chr1	246729626	246730262	gencode::CNST::ENSG00000162852.9	0	+	246729626	246730262	0	2	121,169,	0,467,
chr1	246886848	246887348	gencode::SCCPDH::ENSG00000143653.9	0	+	246886848	246887348	0	1	500,	0,
chr1	247094165	247095226	gencode::AHCTF1::ENSG00000153207.10	0	-	247094165	247095226	0	2	263,500,	0,561,
[truncated: 18,052 more rows]

## Sheet: gc19_pc.ss.gene.bed
chr1	135802	137620	gencode::AL627309.1::ENSG00000237683.5	0	-	135802	137620	0	2	2,2,	0,1816,
chr1	738618	739120	gencode::AL669831.1::ENSG00000269831.1	0	-	738618	739120	0	4	2,2,2,2,	0,167,194,500,
chr1	818058	819960	gencode::AL645608.2::ENSG00000269308.1	0	+	818058	819960	0	4	2,2,2,2,	0,1435,1455,1900,
chr1	861180	879287	gencode::SAMD11::ENSG00000187634.6	0	+	861180	879287	0	23	2,2,2,2,2,2,2,2,2,2,2,2,2,2,2,2,2,2,2,2,2,2,2,	0,4352,5236,5289,9969,10096,13237,13329,13472,13660,15341,15506,16333,16451,16607,16688,16756,17258,17450,17577,17895,18008,18105,
chr1	861406	865998	gencode::AL645608.1::ENSG00000268179.1	0	-	861406	865998	0	6	2,2,2,2,2,2,	0,1846,1855,4313,4581,4590,
chr1	880180	894594	gencode::NOC2L::ENSG00000188976.6	0	-	880180	894594	0	36	2,2,2,2,2,2,2,2,2,2,2,2,2,2,2,2,2,2,2,2,2,2,2,2,2,2,2,2,2,2,2,2,2,2,2,2,	0,254,346,715,853,1370,1486,1599,1745,3328,3432,3687,3803,6324,6438,7197,7339,7609,7800,8372,8488,8979,9092,9201,9282,11120,11213,11292,11415,12091,12225,12296,12473,14126,14281,14412,
chr1	896180	900342	gencode::KLHL17::ENSG00000187961.9	0	+	896180	900342	0	22	2,2,2,2,2,2,2,2,2,2,2,2,2,2,2,2,2,2,2,2,2,2,	0,490,752,826,950,1023,1247,1552,1671,1901,2117,2306,2453,2534,2704,3117,3208,3304,3380,3546,3730,4160,
chr1	901994	909821	gencode::PLEKHN1::ENSG00000187583.6	0	+	901994	909821	0	28	2,2,2,2,2,2,2,2,2,2,2,2,2,2,2,2,2,2,2,2,2,2,2,2,2,2,2,2,	0,87,189,3660,3809,3904,3987,4069,4392,4460,4594,4707,4790,5458,5536,5671,5810,6244,6396,6569,6712,6883,7026,7216,7437,7699,7750,7825,
chr1	911649	917444	gencode::C1orf170::ENSG00000187642.5	0	-	911649	917444	0	8	2,2,2,2,2,2,2,2,	0,227,355,2609,4388,4865,4904,5793,
chr1	934812	935071	gencode::HES4::ENSG00000188290.6	0	-	934812	935071	0	4	2,2,2,2,	0,91,181,257,
chr1	948956	949363	gencode::ISG15::ENSG00000187608.5	0	+	948956	949363	0	2	2,2,	0,405,
chr1	955753	990203	gencode::AGRN::ENSG00000188157.9	0	+	955753	990203	0	70	2,2,2,2,2,2,2,2,2,2,2,2,2,2,2,2,2,2,2,2,2,2,2,2,2,2,2,2,2,2,2,2,2,2,2,2,2,2,2,2,2,2,2,2,2,2,2,2,2,2,2,2,2,2,2,2,2,2,2,2,2,2,2,2,2,2,2,2,2,2,	0,1825,2089,14901,14951,20289,20507,20797,21024,21102,21329,21580,21789,22863,23084,23162,23359,23447,23650,23733,23884,23958,24066,24785,24904,24983,25150,25357,25503,25588,25715,25784,25892,26021,26362,26444,26584,26951,27081,27197,27314,27400,27522,27636,27992,28491,28686,28860,29078,29190,29422,29527,29664,29857,29956,30051,30218,30350,30464,30877,30996,31077,31272,31352,31442,33377,33604,340…
chr1	1007955	1009395	gencode::RNF223::ENSG00000237330.2	0	-	1007955	1009395	0	2	2,2,	0,1438,
chr1	1018367	1051439	gencode::C1orf159::ENSG00000131591.13	0	-	1018367	1051439	0	24	2,2,2,2,2,2,2,2,2,2,2,2,2,2,2,2,2,2,2,2,2,2,2,2,	0,925,1396,1519,2261,2323,2888,3025,4149,4217,4512,4610,7363,7441,7886,7996,8482,8578,9001,9116,22966,32032,32088,33070,
chr1	1109306	1132817	gencode::TTLL10::ENSG00000162571.9	0	+	1109306	1132817	0	31	2,2,2,2,2,2,2,2,2,2,2,2,2,2,2,2,2,2,2,2,2,2,2,2,2,2,2,2,2,2,2,	0,337,356,395,495,563,5260,5407,5728,5811,5927,6105,6414,6554,6675,6802,6934,7812,7889,8432,8520,8947,9121,9991,10165,11040,22671,22790,23164,23260,23509,
chr1	1139348	1141764	gencode::TNFRSF18::ENSG00000186891.9	0	-	1139348	1141764	0	8	2,2,2,2,2,2,2,2,	0,63,268,428,518,1399,1524,2414,
chr1	1147005	1149362	gencode::TNFRSF4::ENSG00000186827.6	0	-	1147005	1149362	0	12	2,2,2,2,2,2,2,2,2,2,2,2,	0,76,207,314,513,1010,1079,1364,1468,2035,2160,2355,
chr1	1153184	1167271	gencode::SDF4::ENSG00000078808.12	0	-	1153184	1167271	0	13	2,2,2,2,2,2,2,2,2,2,2,2,2,	0,651,829,962,1123,2926,5437,5553,6025,6164,10661,11142,14085,
chr1	1178026	1181893	gencode::FAM132A::ENSG00000184163.3	0	-	1178026	1181893	0	14	2,2,2,2,2,2,2,2,2,2,2,2,2,2,	0,186,267,413,506,795,906,1305,1459,1542,1629,1732,1851,3865,
chr1	1190867	1209045	gencode::UBE2J2::ENSG00000160087.16	0	-	1190867	1209045	0	17	2,2,2,2,2,2,2,2,2,2,2,2,2,2,2,2,2,	0,555,638,1502,1643,1718,1823,7856,7899,9293,9343,10608,12243,12372,12505,18009,18176,
chr1	1216046	1226633	gencode::SCNN1D::ENSG00000162572.15	0	+	1216046	1226633	0	34	2,2,2,2,2,2,2,2,2,2,2,2,2,2,2,2,2,2,2,2,2,2,2,2,2,2,2,2,2,2,2,2,2,2,	0,557,631,742,944,1573,1649,3309,3424,4902,4998,5257,5612,6099,6309,6440,6633,6839,6930,7004,7170,7270,7371,9602,9722,9808,9889,9968,10028,10226,10287,10396,10474,10585,
chr1	1229088	1243148	gencode::ACAP3::ENSG00000131584.14	0	-	1229088	1243148	0	46	2,2,2,2,2,2,2,2,2,2,2,2,2,2,2,2,2,2,2,2,2,2,2,2,2,2,2,2,2,2,2,2,2,2,2,2,2,2,2,2,2,2,2,2,2,2,	0,112,225,379,491,691,920,1007,1108,1736,1846,2025,2230,2304,2401,2500,2572,2714,2925,4111,4225,4302,4405,4659,4713,4856,4971,5634,5648,6120,6197,6262,6360,6447,6494,6798,6984,8277,8338,9211,9267,9451,9573,10375,10435,14058,
chr1	1244100	1246709	gencode::PUSL1::ENSG00000169972.7	0	+	1244100	1246709	0	14	2,2,2,2,2,2,2,2,2,2,2,2,2,2,	0,192,252,363,553,731,883,958,1131,1911,1968,2186,2351,2607,
chr1	1247304	1259960	gencode::CPSF3L::ENSG00000127054.14	0	-	1247304	1259960	0	38	2,2,2,2,2,2,2,2,2,2,2,2,2,2,2,2,2,2,2,2,2,2,2,2,2,2,2,2,2,2,2,2,2,2,2,2,2,2,	0,91,223,299,444,513,577,666,776,860,1025,1108,1200,1582,1668,1805,1997,2181,2374,2441,2897,3038,3477,3514,3593,3694,7369,7600,8529,8605,9069,9169,9981,10060,10965,11254,11363,12654,
chr1	1260482	1262620	gencode::GLTPD1::ENSG00000224051.2	0	+	1260482	1262620	0	4	2,2,2,2,	0,1731,1930,2136,
chr1	1266916	1268885	gencode::TAS1R3::ENSG00000169962.4	0	+	1266916	1268885	0	10	2,2,2,2,2,2,2,2,2,2,	0,99,402,485,1270,1382,1588,1720,1843,1967,
chr1	1271895	1284275	gencode::DVL1::ENSG00000107404.13	0	-	1271895	1284275	0	28	2,2,2,2,2,2,2,2,2,2,2,2,2,2,2,2,2,2,2,2,2,2,2,2,2,2,2,2,	0,1459,1668,1751,1921,2004,2138,2769,2924,3064,3134,3218,3297,3520,3662,3729,3801,3892,3988,5149,5290,5535,5641,5845,5969,6171,6243,12378,
chr1	1288712	1296621	gencode::MXRA8::ENSG00000162576.12	0	-	1288712	1296621	0	20	2,2,2,2,2,2,2,2,2,2,2,2,2,2,2,2,2,2,2,2,	0,297,513,614,695,774,858,900,1019,1177,1347,1820,1909,2013,2115,2420,3346,3372,5121,7907,
chr1	1309282	1310533	gencode::AURKAIP1::ENSG00000175756.9	0	-	1309282	1310533	0	8	2,2,2,2,2,2,2,2,	0,95,543,800,888,1092,1170,1249,
chr1	1322962	1334398	gencode::CCNL2::ENSG00000221978.7	0	-	1322962	1334398	0	23	2,2,2,2,2,2,2,2,2,2,2,2,2,2,2,2,2,2,2,2,2,2,2,	0,192,287,369,483,2645,2789,2874,2981,3181,3283,5094,5221,5811,5878,7809,7932,7955,10648,10760,11012,11089,11434,
chr1	1335069	1335984	gencode::RP4-758J18.2::ENSG00000224870.3	0	+	1335069	1335984	0	4	2,2,2,2,	0,466,614,913,
chr1	1337636	1342510	gencode::MRPL20::ENSG00000242485.1	0	-	1337636	1342510	0	5	2,2,2,2,2,	0,3630,4650,4763,4872,
chr1	1354929	1356512	gencode::ANKRD65::ENSG00000235098.4	0	-	1354929	1356512	0	6	2,2,2,2,2,2,	0,500,1043,1245,1456,1581,
chr1	1361765	1362933	gencode::TMEM88B::ENSG00000205116.3	0	+	1361765	1362933	0	2	2,2,	0,1166,
chr1	1371201	1374460	gencode::VWA1::ENSG00000179403.10	0	+	1371201	1374460	0	4	2,2,2,2,	0,1103,1663,3257,
chr1	1386138	1403763	gencode::ATAD3C::ENSG00000215915.5	0	+	1386138	1403763	0	22	2,2,2,2,2,2,2,2,2,2,2,2,2,2,2,2,2,2,2,2,2,2,	0,1285,1364,1604,1676,3584,3742,4699,4761,5030,5158,5464,5591,6368,6422,8400,8473,9989,10159,11839,11950,17623,
chr1	1407469	1430864	gencode::ATAD3B::ENSG00000160072.15	0	+	1407469	1430864	0	31	2,2,2,2,2,2,2,2,2,2,2,2,2,2,2,2,2,2,2,2,2,2,2,2,2,2,2,2,2,2,2,	0,5182,5261,6552,6656,6957,7019,8775,8847,10046,10214,10453,10573,10955,12924,13082,13690,13749,14018,14146,14452,14579,15771,15825,17112,17185,18165,18335,18471,18582,23393,
chr1	1447853	1469305	gencode::ATAD3A::ENSG00000197785.9	0	+	1447853	1469305	0	31	2,2,2,2,2,2,2,2,2,2,2,2,2,2,2,2,2,2,2,2,2,2,2,2,2,2,2,2,2,2,2,	0,217,3536,3615,4691,4939,5240,5302,6445,6517,7665,7833,8072,8144,10268,10426,11035,11094,11363,11491,11797,11924,12764,12818,13985,14058,15219,15389,16747,16858,21450,
chr1	1470887	1475799	gencode::TMEM240::ENSG00000205090.4	0	-	1470887	1475799	0	8	2,2,2,2,2,2,2,2,	0,79,290,4174,4283,4780,4848,4910,
chr1	1477547	1509857	gencode::SSU72::ENSG00000160075.10	0	-	1477547	1509857	0	7	2,2,2,2,2,2,2,	0,1699,1820,2693,2835,22749,32308,
chr1	1551013	1565671	gencode::MIB2::ENSG00000197530.8	0	+	1551013	1565671	0	40	2,2,2,2,2,2,2,2,2,2,2,2,2,2,2,2,2,2,2,2,2,2,2,2,2,2,2,2,2,2,2,2,2,2,2,2,2,2,2,2,	0,467,872,981,2082,7753,8066,8138,8312,9159,9268,9355,9552,9650,9795,9910,10020,11014,11121,11201,11366,11438,11574,11660,11811,12037,12196,12383,12546,12637,12766,12853,13089,13497,13678,13749,13933,14003,14071,14656,
chr1	1567753	1569826	gencode::MMP23B::ENSG00000189409.8	0	+	1567753	1569826	0	12	2,2,2,2,2,2,2,2,2,2,2,2,	0,406,539,604,981,1371,1538,1612,1725,1825,1954,2071,
chr1	1571218	1588824	gencode::CDK11B::ENSG00000248333.3	0	-	1571218	1588824	0	45	2,2,2,2,2,2,2,2,2,2,2,2,2,2,2,2,2,2,2,2,2,2,2,2,2,2,2,2,2,2,2,2,2,2,2,2,2,2,2,2,2,2,2,2,2,	0,78,270,474,625,823,942,1038,1148,1222,1346,1549,1657,1903,2027,2641,2734,4417,4595,5188,5256,5802,5963,6046,6144,6526,6651,9266,9447,9600,9651,9719,9786,9913,10027,10093,10112,10138,10191,10251,10321,15602,15720,17485,17604,
chr1	1597458	1623887	gencode::SLC35E2B::ENSG00000189339.7	0	-	1597458	1623887	0	18	2,2,2,2,2,2,2,2,2,2,2,2,2,2,2,2,2,2,	0,2305,2453,3642,3717,4076,4132,5487,5610,9441,9571,10042,10180,10356,10827,24954,25374,26427,
chr1	1634438	1655696	gencode::CDK11A::ENSG00000008128.18	0	-	1634438	1655696	0	40	2,2,2,2,2,2,2,2,2,2,2,2,2,2,2,2,2,2,2,2,2,2,2,2,2,2,2,2,2,2,2,2,2,2,2,2,2,2,2,2,	0,78,270,474,625,822,941,1037,1147,1221,1345,1548,1656,1902,2026,2640,2733,4407,4585,5178,5246,5792,5953,6036,6134,6477,6641,9262,9428,13344,13479,16326,16456,18594,18712,19586,19635,19706,19832,21256,
chr1	1656861	1677162	gencode::SLC35E2::ENSG00000215790.2	0	-	1656861	1677162	0	13	2,2,2,2,2,2,2,2,2,2,2,2,2,	0,7101,9265,9413,12896,13026,13497,13635,13811,14282,18826,19246,20299,
chr1	1684499	1711343	gencode::NADK::ENSG00000008130.11	0	-	1684499	1711343	0	29	2,2,2,2,2,2,2,2,2,2,2,2,2,2,2,2,2,2,2,2,2,2,2,2,2,2,2,2,2,	0,504,589,988,1148,1221,1323,1481,1638,2311,2416,3195,3283,3440,3597,4044,4250,5302,6038,6183,6671,6842,8889,8975,12165,12386,25226,25683,26842,
chr1	1718492	1822258	gencode::GNB1::ENSG00000078369.13	0	-	1718492	1822258	0	22	2,2,2,2,2,2,2,2,2,2,2,2,2,2,2,2,2,2,2,2,2,2,	0,266,384,1997,2216,3339,3543,6189,6258,17363,17528,19419,19485,28700,28809,30781,30822,38341,38446,52134,52185,103764,
chr1	1846746	1848585	gencode::CALML6::ENSG00000169885.5	0	+	1846746	1848585	0	10	2,2,2,2,2,2,2,2,2,2,	0,375,428,1131,1308,1442,1589,1664,1767,1837,
chr1	1849601	1850620	gencode::TMEM52::ENSG00000178821.8	0	-	1849601	1850620	0	7	2,2,2,2,2,2,2,	0,88,728,772,880,926,1017,
chr1	1919572	1935139	gencode::C1orf222::ENSG00000142609.13	0	-	1919572	1935139	0	8	2,2,2,2,2,2,2,2,	0,376,522,753,840,2754,2842,15565,
chr1	1950930	1961421	gencode::GABRD::ENSG00000187730.6	0	+	1950930	1961421	0	16	2,2,2,2,2,2,2,2,2,2,2,2,2,2,2,2,	0,5448,5563,5840,5910,6024,6247,8083,8168,8661,8801,9617,9775,10057,10271,10489,
chr1	2005368	2116360	gencode::PRKCZ::ENSG00000067606.11	0	+	2005368	2116360	0	29	2,2,2,2,2,2,2,2,2,2,2,2,2,2,2,2,2,2,2,2,2,2,2,2,2,2,2,2,2,	0,30966,61330,61418,70278,70412,72095,72179,74940,74995,76858,77049,82063,82163,95586,95675,98123,98261,98369,98459,99965,100087,100822,100904,101292,101384,110651,110769,110990,
chr1	2116952	2130192	gencode::C1orf86::ENSG00000162585.12	0	-	2116952	2130192	0	16	2,2,2,2,2,2,2,2,2,2,2,2,2,2,2,2,	0,488,736,1322,1693,4268,7329,7462,8123,8397,8482,8620,9172,12491,12629,13238,
chr1	2161174	2238015	gencode::SKI::ENSG00000157933.9	0	+	2161174	2238015	0	12	2,2,2,2,2,2,2,2,2,2,2,2,	0,73240,73368,73547,73665,74102,74367,74555,74850,76282,76515,76839,
chr1	2253018	2322896	gencode::MORN1::ENSG00000116151.9	0	-	2253018	2322896	0	27	2,2,2,2,2,2,2,2,2,2,2,2,2,2,2,2,2,2,2,2,2,2,2,2,2,2,2,	0,2515,2564,14887,14969,15135,15271,33885,35850,36019,37010,37136,50899,51012,52879,52978,63396,63486,64225,64318,65837,65950,66657,66758,68343,68417,69876,
chr1	2323397	2334473	gencode::RER1::ENSG00000157916.14	0	+	2323397	2334473	0	12	2,2,2,2,2,2,2,2,2,2,2,2,	0,3823,3913,5155,5262,7454,7556,8896,8977,10136,10384,11074,
chr1	2337273	2343829	gencode::PEX10::ENSG00000157911.5	0	-	2337273	2343829	0	10	2,2,2,2,2,2,2,2,2,2,	0,647,785,883,1121,2615,3024,4534,4617,6554,
chr1	2399101	2435360	gencode::PLCH2::ENSG00000149527.13	0	+	2399101	2435360	0	43	2,2,2,2,2,2,2,2,2,2,2,2,2,2,2,2,2,2,2,2,2,2,2,2,2,2,2,2,2,2,2,2,2,2,2,2,2,2,2,2,2,2,2,	0,9050,10811,10960,12069,12316,12518,12650,16783,16956,19242,19338,19508,19714,19933,20056,21542,21716,22095,22205,23527,23673,27191,27286,27823,27908,28942,29042,29163,29348,29837,29947,30858,30985,31079,31166,31419,31568,31976,32058,34447,35952,36257,
chr1	2440499	2457902	gencode::PANK4::ENSG00000157881.9	0	-	2440499	2457902	0	36	2,2,2,2,2,2,2,2,2,2,2,2,2,2,2,2,2,2,2,2,2,2,2,2,2,2,2,2,2,2,2,2,2,2,2,2,	0,799,870,994,1097,1615,1722,2275,2327,2565,2623,3825,3979,4939,5029,5291,5406,6499,6657,9101,9204,9453,9537,10080,10264,10738,10894,11259,11354,11660,11846,12038,12255,12655,12740,17401,
chr1	2461188	2461549	gencode::HES5::ENSG00000197921.5	0	-	2461188	2461549	0	4	2,2,2,2,	0,94,262,359,
chr1	2487700	2494586	gencode::TNFRSF14::ENSG00000157873.13	0	+	2487700	2494586	0	17	2,2,2,2,2,2,2,2,2,2,2,2,2,2,2,2,2,	0,321,472,1462,1573,2079,2207,3559,3717,4360,4453,5230,5409,5554,6601,6635,6884,
chr1	2518387	2520848	gencode::FAM213B::ENSG00000157870.10	0	+	2518387	2520848	0	12	2,2,2,2,2,2,2,2,2,2,2,2,	0,140,347,790,844,1385,1505,1599,1677,1971,2092,2459,
chr1	2522528	2564304	gencode::MMEL1::ENSG00000142606.11	0	-	2522528	2564304	0	46	2,2,2,2,2,2,2,2,2,2,2,2,2,2,2,2,2,2,2,2,2,2,2,2,2,2,2,2,2,2,2,2,2,2,2,2,2,2,2,2,2,2,2,2,2,2,	0,465,544,840,938,1563,1631,1741,1877,2722,2844,3293,3354,3698,3804,4184,4270,4917,5018,5469,5600,7115,7211,7562,7701,12792,12884,13055,13192,14466,14534,15156,15277,15882,15980,18247,18330,18578,18742,20189,20251,21035,21115,38239,38432,41774,
chr1	2568003	2718141	gencode::TTC34::ENSG00000215912.7	0	-	2568003	2718141	0	19	2,2,2,2,2,2,2,2,2,2,2,2,2,2,2,2,2,2,2,	0,3533,3596,4767,5331,7697,7914,8726,8999,132148,132317,134378,134585,136040,136268,138062,149330,149430,150136,
chr1	2985860	3350240	gencode::PRDM16::ENSG00000142611.12	0	+	2985860	3350240	0	34	2,2,2,2,2,2,2,2,2,2,2,2,2,2,2,2,2,2,2,2,2,2,2,2,2,2,2,2,2,2,2,2,2,2,	0,116826,117178,174788,174841,315850,315990,325193,325198,327192,327297,333492,333702,335440,335590,336196,336352,342085,343504,345261,345351,348529,348701,349368,349448,356282,356454,356752,356929,361573,361812,362667,362844,364378,
chr1	3371375	3397011	gencode::ARHGEF16::ENSG00000130762.10	0	+	3371375	3397011	0	29	2,2,2,2,2,2,2,2,2,2,2,2,2,2,2,2,2,2,2,2,2,2,2,2,2,2,2,2,2,	0,8252,8861,11334,11382,12354,12526,14066,14125,14619,14782,16980,18264,18419,18579,18711,19894,19971,21156,21251,23061,23215,23610,23801,24703,24779,24998,25102,25634,
chr1	3407153	3527701	gencode::MEGF6::ENSG00000162591.11	0	-	3407153	3527701	0	73	2,2,2,2,2,2,2,2,2,2,2,2,2,2,2,2,2,2,2,2,2,2,2,2,2,2,2,2,2,2,2,2,2,2,2,2,2,2,2,2,2,2,2,2,2,2,2,2,2,2,2,2,2,2,2,2,2,2,2,2,2,2,2,2,2,2,2,2,2,2,2,2,2,	0,320,370,2047,2178,3179,3310,3404,3535,3779,3910,4021,4152,5298,5429,6063,6194,6396,6530,6641,6772,7779,7910,8106,8237,8546,8677,8996,9127,9204,9335,10041,10175,10374,10505,10585,10719,11204,11332,14616,14753,14830,14967,15516,15647,17203,17334,17966,18100,18483,18656,19278,19403,20191,20313,20958,21098,21414,21539,23958,24083,24810,24938,33532,33657,40488,89233,89340,104746,104858,111874,112011…
chr1	3541837	3544972	gencode::TPRG1L::ENSG00000158109.10	0	+	3541837	3544972	0	8	2,2,2,2,2,2,2,2,	0,148,242,437,616,2224,2380,3133,
chr1	3547681	3566494	gencode::WRAP73::ENSG00000116213.11	0	-	3547681	3566494	0	21	2,2,2,2,2,2,2,2,2,2,2,2,2,2,2,2,2,2,2,2,2,	0,540,1093,1221,2278,2386,3877,3957,4040,4177,4824,4913,5875,5981,7630,7705,15546,15665,16288,16443,18811,
chr1	3569205	3649310	gencode::TP73::ENSG00000078900.10	0	+	3569205	3649310	0	28	2,2,2,2,2,2,2,2,2,2,2,2,2,2,2,2,2,2,2,2,2,2,2,2,2,2,2,2,	0,29689,29789,30416,30539,38303,45510,54905,55150,69377,69566,70710,70828,74471,74583,74984,75129,75485,75576,76683,76807,77356,77507,78283,78424,78819,78915,80103,
chr1	3669363	3687964	gencode::CCDC27::ENSG00000162592.4	0	+	3669363	3687964	0	22	2,2,2,2,2,2,2,2,2,2,2,2,2,2,2,2,2,2,2,2,2,2,	0,1316,1442,2655,2768,3931,4091,8479,8631,9818,9913,10306,10675,10904,11037,13733,13813,14431,14646,16981,17088,18599,
chr1	3689405	3692358	gencode::SMIM1::ENSG00000235169.3	0	+	3689405	3692358	0	5	2,2,2,2,2,	0,219,340,2455,2951,
chr1	3697900	3712425	gencode::LRRC47::ENSG00000130764.5	0	-	3697900	3712425	0	12	2,2,2,2,2,2,2,2,2,2,2,2,	0,173,265,1322,1427,2657,2775,3748,3867,5510,5974,14523,
chr1	3732081	3773452	gencode::CEP104::ENSG00000116198.8	0	-	3732081	3773452	0	43	2,2,2,2,2,2,2,2,2,2,2,2,2,2,2,2,2,2,2,2,2,2,2,2,2,2,2,2,2,2,2,2,2,2,2,2,2,2,2,2,2,2,2,	0,760,853,7654,7724,7904,8045,10238,10349,10850,10919,11188,11227,13746,13856,14271,14480,15526,15705,18342,18518,19405,19575,20975,21175,21772,22002,23444,23602,24088,24259,27806,29387,29466,29769,29834,31955,32096,33088,33264,36775,36904,41369,
chr1	3774281	3800070	gencode::DFFB::ENSG00000169598.11	0	+	3774281	3800070	0	15	2,2,2,2,2,2,2,2,2,2,2,2,2,2,2,	0,998,1127,2700,7923,8092,8283,10254,10336,11885,12058,14752,14855,15294,25787,
chr1	3806637	3816735	gencode::C1orf174::ENSG00000198912.6	0	-	3806637	3816735	0	6	2,2,2,2,2,2,	0,493,984,2807,2923,10096,
chr1	4715514	4842604	gencode::AJAP1::ENSG00000196581.6	0	+	4715514	4842604	0	11	2,2,2,2,2,2,2,2,2,2,2,	0,56443,57245,114396,114486,116823,117071,118970,119104,121944,127088,
chr1	5923465	6052303	gencode::NPHP4::ENSG00000131697.13	0	-	5923465	6052303	0	58	2,2,2,2,2,2,2,2,2,2,2,2,2,2,2,2,2,2,2,2,2,2,2,2,2,2,2,2,2,2,2,2,2,2,2,2,2,2,2,2,2,2,2,2,2,2,2,2,2,2,2,2,2,2,2,2,2,2,	0,482,628,930,1112,1694,1868,2965,3053,3622,3710,4332,4491,9844,9930,11063,11252,11466,11695,13685,13893,16706,16834,23878,24061,27460,27623,41209,41399,41884,42078,42224,42378,43707,43817,45744,45808,64241,64382,69739,69924,83696,83825,84662,84846,89292,89431,98386,98544,103891,103958,105679,105854,114862,115008,122747,122922,128836,
chr1	6051616	6159882	gencode::KCNAB2::ENSG00000069424.10	0	+	6051616	6159882	0	40	2,2,2,2,2,2,2,2,2,2,2,2,2,2,2,2,2,2,2,2,2,2,2,2,2,2,2,2,2,2,2,2,2,2,2,2,2,2,2,2,	0,1232,34889,43238,48958,49089,50272,50316,54627,59952,60198,81196,81242,82174,82214,90636,90718,93645,93692,95908,95955,97449,97495,98830,98919,99704,99751,102841,102929,103764,103887,103971,104068,104562,104570,105077,105200,105710,106926,108264,
chr1	6101386	6101388	gencode::AL035406.1::ENSG00000268332.1	0	-	6101386	6101388	0	1	2,	0,
chr1	6165487	6240004	gencode::CHD5::ENSG00000116254.13	0	-	6165487	6240004	0	82	2,2,2,2,2,2,2,2,2,2,2,2,2,2,2,2,2,2,2,2,2,2,2,2,2,2,2,2,2,2,2,2,2,2,2,2,2,2,2,2,2,2,2,2,2,2,2,2,2,2,2,2,2,2,2,2,2,2,2,2,2,2,2,2,2,2,2,2,2,2,2,2,2,2,2,2,2,2,2,2,2,2,	0,804,860,965,1082,1186,1352,4365,4563,4964,5099,6345,6456,6710,6850,7479,7571,15675,15810,16064,16146,18518,18680,19087,19234,19670,19806,20094,20185,20336,20431,21142,21319,22616,22791,23069,23182,23408,23642,24774,24901,26201,26321,28698,28832,29288,29432,29800,29976,31087,31211,31298,31438,36698,36901,36984,37178,38393,38504,38594,38728,40782,40996,41235,41444,43424,43648,43816,43985,45602,45…
chr1	6241546	6260548	gencode::RPL22::ENSG00000116251.5	0	-	6241546	6260548	0	8	2,2,2,2,2,2,2,2,	0,5330,11441,11568,16163,16270,18073,19000,
chr1	6266362	6279295	gencode::RNF207::ENSG00000158286.8	0	+	6266362	6279295	0	34	2,2,2,2,2,2,2,2,2,2,2,2,2,2,2,2,2,2,2,2,2,2,2,2,2,2,2,2,2,2,2,2,2,2,	0,231,424,1074,1209,2576,2723,2810,2894,2963,3041,3109,3237,3619,3668,3918,3993,4065,4136,4565,4636,4716,4816,5562,5751,5926,6114,6377,6431,6761,6881,11984,12067,12931,
chr1	6285322	6295776	gencode::ICMT::ENSG00000116237.11	0	-	6285322	6295776	0	9	2,2,2,2,2,2,2,2,2,	0,6637,6857,8209,8381,9249,9621,9712,10452,
chr1	6304301	6305169	gencode::HES3::ENSG00000173673.7	0	+	6304301	6305169	0	6	2,2,2,2,2,2,	0,107,205,304,388,866,
chr1	6310063	6320884	gencode::GPR153::ENSG00000158292.6	0	-	6310063	6320884	0	10	2,2,2,2,2,2,2,2,2,2,	0,434,621,1332,1527,3712,4144,4544,5011,10819,
chr1	6324755	6453316	gencode::ACOT7::ENSG00000097021.15	0	-	6324755	6453316	0	20	2,2,2,2,2,2,2,2,2,2,2,2,2,2,2,2,2,2,2,2,	0,16404,16591,30166,30285,42187,53794,53883,62601,62718,68779,68873,74735,74894,85051,85171,94128,95872,120796,128559,
chr1	6473342	6484537	gencode::HES2::ENSG00000069812.7	0	-	6473342	6484537	0	8	2,2,2,2,2,2,2,2,	0,5871,6058,6322,6420,6491,6561,11193,
chr1	6485309	6520058	gencode::ESPN::ENSG00000187017.10	0	+	6485309	6520058	0	25	2,2,2,2,2,2,2,2,2,2,2,2,2,2,2,2,2,2,2,2,2,2,2,2,2,	0,2974,3170,15002,15191,15374,15559,15682,15816,19229,19433,20412,20686,22868,23389,23842,26351,26499,26581,26847,31932,32014,32109,32123,34747,
chr1	6521822	6526128	gencode::TNFRSF25::ENSG00000215788.5	0	-	6521822	6526128	0	18	2,2,2,2,2,2,2,2,2,2,2,2,2,2,2,2,2,2,	0,229,412,864,904,1098,1208,1300,1385,2610,2691,2787,2957,3323,3460,3675,3798,4304,
chr1	6527632	6579504	gencode::PLEKHG5::ENSG00000171680.16	0	-	6527632	6579504	0	48	2,2,2,2,2,2,2,2,2,2,2,2,2,2,2,2,2,2,2,2,2,2,2,2,2,2,2,2,2,2,2,2,2,2,2,2,2,2,2,2,2,2,2,2,2,2,2,2,	0,250,1014,1467,1669,1760,1878,1969,2104,2661,2783,2931,3071,3160,3312,3415,3528,3913,4065,4183,4236,4952,5050,5411,5602,5676,5882,6438,6592,6876,7015,7472,7566,7887,7950,8356,8464,9954,10086,17749,18261,22870,24062,28918,28997,29384,29745,51870,
chr1	6586063	6614166	gencode::NOL9::ENSG00000162408.10	0	-	6586063	6614166	0	22	2,2,2,2,2,2,2,2,2,2,2,2,2,2,2,2,2,2,2,2,2,2,	0,690,826,2988,3168,5962,6076,6457,6757,7274,7438,15824,15924,18820,18919,19039,19177,23565,23695,24390,24612,28101,
chr1	6615624	6638712	gencode::TAS1R1::ENSG00000173662.15	0	+	6615624	6638712	0	10	2,2,2,2,2,2,2,2,2,2,	0,15342,15651,19064,19828,20848,21063,21383,21506,23086,
chr1	6640196	6648975	gencode::ZBTB48::ENSG00000204859.7	0	+	6640196	6648975	0	20	2,2,2,2,2,2,2,2,2,2,2,2,2,2,2,2,2,2,2,2,	0,402,1163,1919,2163,5780,5894,6556,6651,7066,7155,7339,7496,7921,8060,8139,8306,8617,8708,8777,
chr1	6653718	6674509	gencode::KLHL21::ENSG00000162413.12	0	-	6653718	6674509	0	7	2,2,2,2,2,2,2,	0,452,1899,5386,5794,8136,20789,
chr1	6674165	6681470	gencode::PHF13::ENSG00000116273.5	0	+	6674165	6681470	0	6	2,2,2,2,2,2,	0,2649,2753,5695,6232,7303,
chr1	6685014	6694079	gencode::THAP3::ENSG00000041988.11	0	+	6685014	6694079	0	11	2,2,2,2,2,2,2,2,2,2,2,	0,193,338,3542,3737,5331,5399,7413,7541,7839,9063,
chr1	6694844	6761788	gencode::DNAJC11::ENSG00000007923.11	0	-	6694844	6761788	0	32	2,2,2,2,2,2,2,2,2,2,2,2,2,2,2,2,2,2,2,2,2,2,2,2,2,2,2,2,2,2,2,2,	0,916,1330,1462,2411,2556,2660,2720,3508,3580,5115,5273,9771,9890,10254,10342,11002,11194,16742,16818,18042,18167,19124,19255,32922,33026,43607,43683,46121,46253,46446,66942,
chr1	6845635	7826518	gencode::CAMTA1::ENSG00000171735.14	0	+	6845635	7826518	0	48	2,2,2,2,2,2,2,2,2,2,2,2,2,2,2,2,2,2,2,2,2,2,2,2,2,2,2,2,2,2,2,2,2,2,2,2,2,2,2,2,2,2,2,2,2,2,2,2,	0,21405,21513,34603,34675,39514,39635,86179,102076,305726,305796,463913,464051,682252,682326,854822,854978,876148,876291,877775,879624,885333,885462,892021,892158,946870,947024,950766,950965,951353,951434,951677,951995,952381,952907,959257,959447,960267,960516,962132,962206,965621,965817,966881,966958,970060,970093,980881,
chr1	7831445	7839685	gencode::VAMP3::ENSG00000049245.8	0	+	7831445	7839685	0	9	2,2,2,2,2,2,2,2,2,	0,1813,2054,2126,5772,5933,6730,6784,8238,
chr1	7844436	7902731	gencode::PER3::ENSG00000049246.10	0	+	7844436	7902731	0	41	2,2,2,2,2,2,2,2,2,2,2,2,2,2,2,2,2,2,2,2,2,2,2,2,2,2,2,2,2,2,2,2,2,2,2,2,2,2,2,2,2,	0,275,629,1062,1210,2342,2460,3666,3870,9578,9632,14146,14297,16734,16815,18668,18777,19313,24514,24622,25514,25645,26059,26212,34906,35044,35736,35863,36088,36264,42101,42334,42739,43439,45455,45785,51383,51569,52620,52773,58293,
chr1	7904010	7913366	gencode::UTS2::ENSG00000049247.9	0	-	7904010	7913366	0	11	2,2,2,2,2,2,2,2,2,2,2,	0,2739,2816,3932,5687,5733,6859,6972,8948,9168,9354,
chr1	7980983	8000843	gencode::TNFRSF9::ENSG00000049249.4	0	-	7980983	8000843	0	14	2,2,2,2,2,2,2,2,2,2,2,2,2,2,	0,12236,12373,14087,14220,16764,16833,17267,17407,17795,17905,18969,19155,19858,
chr1	8021795	8044953	gencode::PARK7::ENSG00000116288.8	0	+	8021795	8044953	0	15	2,2,2,2,2,2,2,2,2,2,2,2,2,2,2,	0,58,346,366,1025,1140,3586,3690,7607,7669,9156,9228,15914,16003,23156,
chr1	8064618	8086217	gencode::ERRFI1::ENSG00000116285.8	0	-	8064618	8086217	0	6	2,2,2,2,2,2,	0,9838,10826,10934,11134,21597,
chr1	8378246	8403806	gencode::SLC45A1::ENSG00000162426.10	0	+	8378246	8403806	0	16	2,2,2,2,2,2,2,2,2,2,2,2,2,2,2,2,	0,6117,6540,7109,7204,7629,7856,12020,12750,17248,17404,19627,19806,21304,21512,25558,
chr1	8415180	8877218	gencode::RERE::ENSG00000142599.13	0	-	8415180	8877218	0	48	2,2,2,2,2,2,2,2,2,2,2,2,2,2,2,2,2,2,2,2,2,2,2,2,2,2,2,2,2,2,2,2,2,2,2,2,2,2,2,2,2,2,2,2,2,2,2,2,	0,296,479,977,1126,3073,3796,4641,4866,4989,6370,6640,6756,7560,7724,8933,9135,9623,9718,10689,10854,67604,67687,68438,110802,110903,139940,140042,142282,142409,153503,153554,170635,186090,186197,201351,201450,202294,202402,259437,259565,269186,269259,300849,301320,437280,437467,462036,
chr1	8921488	8938638	gencode::ENO1::ENSG00000074800.9	0	-	8921488	8938638	0	22	2,2,2,2,2,2,2,2,2,2,2,2,2,2,2,2,2,2,2,2,2,2,	0,1455,1516,1803,1914,2459,2663,3853,4053,4847,5072,5685,5821,6556,6628,9020,9081,10459,10557,13392,13488,17148,
chr1	9006024	9034680	gencode::CA6::ENSG00000131686.10	0	+	9006024	9034680	0	16	2,2,2,2,2,2,2,2,2,2,2,2,2,2,2,2,	0,3295,3477,5455,11169,11320,12942,13037,16619,16691,21691,21851,24899,25016,28379,28654,
chr1	9063577	9086353	gencode::SLC2A7::ENSG00000197241.3	0	-	9063577	9086353	0	22	2,2,2,2,2,2,2,2,2,2,2,2,2,2,2,2,2,2,2,2,2,2,	0,1231,1361,3789,3867,6622,6726,10004,10117,11160,11350,11596,11724,14702,14857,15688,15815,19397,19560,21455,21556,22774,
chr1	9097848	9129562	gencode::SLC2A5::ENSG00000142583.13	0	-	9097848	9129562	0	22	2,2,2,2,2,2,2,2,2,2,2,2,2,2,2,2,2,2,2,2,2,2,	0,105,235,639,717,1036,1140,1760,1873,2008,2198,2272,2400,4148,9818,9945,11308,19656,19819,20360,20461,31712,
chr1	9164693	9188703	gencode::GPR157::ENSG00000180758.10	0	-	9164693	9188703	0	6	2,2,2,2,2,2,	0,849,1046,6639,6855,24008,
chr1	9295125	9323567	gencode::H6PD::ENSG00000049239.8	0	+	9295125	9323567	0	9	2,2,2,2,2,2,2,2,2,	0,4952,9856,10495,11897,12017,26990,27262,28440,
chr1	9353130	9427506	gencode::SPSB1::ENSG00000171621.9	0	+	9353130	9427506	0	5	2,2,2,2,2,	0,58539,62669,63514,74374,
chr1	9599806	9642356	gencode::SLC25A33::ENSG00000171612.6	0	+	9599806	9642356	0	12	2,2,2,2,2,2,2,2,2,2,2,2,	0,13875,14057,27533,27613,30507,30610,33595,33664,40203,40486,42548,
chr1	9649101	9673043	gencode::TMEM201::ENSG00000188807.8	0	+	9649101	9673043	0	19	2,2,2,2,2,2,2,2,2,2,2,2,2,2,2,2,2,2,2,	0,6844,6967,7813,8010,9403,9582,12059,12411,13023,18511,18746,20794,20868,21460,21762,22707,22847,23940,
chr1	9711860	9786966	gencode::PIK3CD::ENSG00000171608.11	0	+	9711860	9786966	0	47	2,2,2,2,2,2,2,2,2,2,2,2,2,2,2,2,2,2,2,2,2,2,2,2,2,2,2,2,2,2,2,2,2,2,2,2,2,2,2,2,2,2,2,2,2,2,2,	0,39662,39769,58478,58619,58794,63736,63967,64044,64276,64635,64817,65154,65306,65732,65824,66356,66889,67113,68116,68215,68307,68440,68629,68859,68937,69107,69322,69446,69639,69956,70058,70170,70351,70439,70554,70723,70804,71320,71490,72164,72290,72471,72619,72999,73134,75104,
chr1	9714101	9714255	gencode::C1orf200::ENSG00000179840.5	0	-	9714101	9714255	0	2	2,2,	0,152,
chr1	9790763	9883700	gencode::CLSTN1::ENSG00000171603.12	0	-	9790763	9883700	0	36	2,2,2,2,2,2,2,2,2,2,2,2,2,2,2,2,2,2,2,2,2,2,2,2,2,2,2,2,2,2,2,2,2,2,2,2,	0,498,685,1053,1191,2693,2841,3264,3437,4240,4469,4759,4910,5177,5337,6790,6849,10386,10551,13176,13300,13687,13938,18753,18941,19056,19208,20765,20976,24406,24604,25773,25805,42564,42689,92935,
chr1	9910638	9970152	gencode::CTNNBIP1::ENSG00000178585.10	0	-	9910638	9970152	0	14	2,2,2,2,2,2,2,2,2,2,2,2,2,2,	0,39,196,20604,20697,21386,21508,27322,27409,27557,33122,33158,42426,59512,
chr1	9990515	10003406	gencode::LZIC::ENSG00000162441.7	0	-	9990515	10003406	0	16	2,2,2,2,2,2,2,2,2,2,2,2,2,2,2,2,	0,1431,1515,2343,2441,4302,4403,5032,5170,6059,6170,12164,12221,12325,12789,12889,
chr1	10003573	10042358	gencode::NMNAT1::ENSG00000173614.9	0	+	10003573	10042358	0	9	2,2,2,2,2,2,2,2,2,	0,28500,28673,32074,32260,37513,37655,37738,38783,
chr1	10057389	10075839	gencode::RBP7::ENSG00000162444.11	0	+	10057389	10075839	0	6	2,2,2,2,2,2,	0,10236,10417,10839,10943,18448,
chr1	10093752	10239952	gencode::UBE4B::ENSG00000130939.14	0	+	10093752	10239952	0	55	2,2,2,2,2,2,2,2,2,2,2,2,2,2,2,2,2,2,2,2,2,2,2,2,2,2,2,2,2,2,2,2,2,2,2,2,2,2,2,2,2,2,2,2,2,2,2,2,2,2,2,2,2,2,2,	0,38331,38520,38757,61764,61902,67411,67501,69251,69398,71819,72050,72500,72889,83762,83906,85816,85919,88265,88382,93097,93183,95695,95754,96803,96922,97018,97119,98672,98788,101291,101492,103370,103511,111243,111345,113266,113396,115487,115588,117629,117867,124659,124788,127445,127592,134439,134576,137441,137635,144947,145136,145719,145868,146198,
chr1	10270936	10438396	gencode::KIF1B::ENSG00000054523.12	0	+	10270936	10438396	0	100	2,2,2,2,2,2,2,2,2,2,2,2,2,2,2,2,2,2,2,2,2,2,2,2,2,2,2,2,2,2,2,2,2,2,2,2,2,2,2,2,2,2,2,2,2,2,2,2,2,2,2,2,2,2,2,2,2,2,2,2,2,2,2,2,2,2,2,2,2,2,2,2,2,2,2,2,2,2,2,2,2,2,2,2,2,2,2,2,2,2,2,2,2,2,2,2,2,2,2,2,	0,860,20119,21369,21556,45366,45445,47612,47794,51024,51092,56499,56680,57271,57385,60621,60701,61360,61428,62133,62153,64547,64625,65440,65521,67105,67250,68216,68260,71441,71655,80201,80283,81166,81244,84205,84287,84779,84888,85701,85787,86016,86199,86293,86368,92282,109162,109258,110828,110979,113003,113184,113877,114017,115230,115481,123639,123760,125776,125864,126193,126325,126490,126655,128…
chr1	10459182	10479686	gencode::PGD::ENSG00000142657.16	0	+	10459182	10479686	0	25	2,2,2,2,2,2,2,2,2,2,2,2,2,2,2,2,2,2,2,2,2,2,2,2,2,	0,205,501,579,1265,1447,3943,4011,5033,5154,8943,9015,12290,12427,13934,14126,17859,17992,18248,18384,19698,19800,20289,20414,20502,
chr1	10490625	10511433	gencode::APITD1-CORT::ENSG00000251503.3	0	+	10490625	10511433	0	8	2,2,2,2,2,2,2,2,	0,3271,3397,4086,4122,9776,9845,20806,
chr1	10490625	10511433	gencode::APITD1::ENSG00000175279.17	0	+	10490625	10511433	0	9	2,2,2,2,2,2,2,2,2,	0,3271,3397,4086,4122,9776,9845,11694,20806,
chr1	10510379	10511433	gencode::CORT::ENSG00000241563.2	0	+	10510379	10511433	0	2	2,2,	0,1052,
chr1	10521759	10532379	gencode::DFFA::ENSG00000160049.7	0	-	10521759	10532379	0	9	2,2,2,2,2,2,2,2,2,	0,1507,1726,1918,5485,5630,7472,7636,10618,
chr1	10535059	10689587	gencode::PEX14::ENSG00000142655.8	0	+	10535059	10689587	0	16	2,2,2,2,2,2,2,2,2,2,2,2,2,2,2,2,	0,20269,20319,61208,61295,124233,124364,143327,143415,148014,148119,149335,149435,152267,152361,154526,
chr1	10700116	10856620	gencode::CASZ1::ENSG00000130940.10	0	-	10700116	10856620	0	39	2,2,2,2,2,2,2,2,2,2,2,2,2,2,2,2,2,2,2,2,2,2,2,2,2,2,2,2,2,2,2,2,2,2,2,2,2,2,2,	0,2797,2941,3098,3252,4855,5029,6066,6267,8080,9008,9133,9221,9378,10630,10696,10879,11017,13315,14159,14357,14532,15587,15754,16584,16677,18446,18517,19640,20477,25021,25512,53812,53853,65430,65485,120639,120798,156502,
chr1	11006798	11042068	gencode::C1orf127::ENSG00000175262.10	0	-	11006798	11042068	0	24	2,2,2,2,2,2,2,2,2,2,2,2,2,2,2,2,2,2,2,2,2,2,2,2,	0,899,2103,2880,3073,7275,7401,8246,8445,10279,10366,10841,11012,11970,12011,17384,17530,19614,19741,23226,23348,29412,29515,35268,
chr1	11072800	11083249	gencode::TARDBP::ENSG00000120948.11	0	+	11072800	11083249	0	11	2,2,2,2,2,2,2,2,2,2,2,	0,970,1222,4098,4264,5987,6130,7683,7856,9378,10447,
chr1	11087705	11107259	gencode::MASP2::ENSG00000009724.12	0	-	11087705	11107259	0	21	2,2,2,2,2,2,2,2,2,2,2,2,2,2,2,2,2,2,2,2,2,	0,2525,2602,3097,3234,7177,7258,10042,10163,15224,15374,15688,15887,17305,17757,17891,18905,19085,19240,19471,19552,
chr1	11114942	11119833	gencode::SRM::ENSG00000116649.5	0	-	11114942	11119833	0	14	2,2,2,2,2,2,2,2,2,2,2,2,2,2,	0,74,199,893,1041,1123,1209,1716,1872,3912,4007,4337,4460,4889,
chr1	11126805	11159777	gencode::EXOSC10::ENSG00000171824.9	0	-	11126805	11159777	0	45	2,2,2,2,2,2,2,2,2,2,2,2,2,2,2,2,2,2,2,2,2,2,2,2,2,2,2,2,2,2,2,2,2,2,2,2,2,2,2,2,2,2,2,2,2,	0,1257,1336,1894,1958,2808,2982,4149,4225,5336,5423,7183,7260,7480,7578,10091,10200,10903,12960,13074,13748,13801,14013,14164,14331,14490,15937,16130,20697,20843,21049,21162,21372,21450,23803,23920,24263,24431,24742,24849,29007,29133,31269,31408,32970,
chr1	11167557	11322501	gencode::MTOR::ENSG00000198793.8	0	-	11167557	11322501	0	114	2,2,2,2,2,2,2,2,2,2,2,2,2,2,2,2,2,2,2,2,2,2,2,2,2,2,2,2,2,2,2,2,2,2,2,2,2,2,2,2,2,2,2,2,2,2,2,2,2,2,2,2,2,2,2,2,2,2,2,2,2,2,2,2,2,2,2,2,2,2,2,2,2,2,2,2,2,2,2,2,2,2,2,2,2,2,2,2,2,2,2,2,2,2,2,2,2,2,2,2,2,2,2,2,2,2,2,2,2,2,2,2,2,2,	0,678,786,1787,1870,2146,2229,5349,5417,6815,6953,7310,7387,7893,7968,9501,9586,13743,13868,14476,14626,16995,17133,19119,19296,19507,19644,20121,20306,20501,20626,20951,21052,21352,21451,22235,22338,23026,23277,25577,25697,26848,26966,31801,31935,32030,32158,37145,37255,37465,37545,39173,39291,42623,42726,49649,49791,59939,60017,91755,91903,92038,92203,97058,97203,101809,101958,103311,103406,104…
chr1	11250012	11254910	gencode::ANGPTL7::ENSG00000171819.4	0	+	11250012	11254910	0	8	2,2,2,2,2,2,2,2,	0,2312,2415,3622,3819,4503,4704,4896,
chr1	11334117	11354929	gencode::UBIAD1::ENSG00000120942.9	0	+	11334117	11354929	0	3	2,2,2,	0,11581,20810,
chr1	11539429	11596380	gencode::PTCHD2::ENSG00000204624.6	0	+	11539429	11596380	0	43	2,2,2,2,2,2,2,2,2,2,2,2,2,2,2,2,2,2,2,2,2,2,2,2,2,2,2,2,2,2,2,2,2,2,2,2,2,2,2,2,2,2,2,	0,21615,22716,23303,23525,35015,35154,35994,36131,36626,36789,38088,38230,39980,40131,40344,40508,41312,41476,44567,44683,45801,45940,47276,47463,50181,50314,50412,50587,51532,51661,52190,52338,54455,55006,55168,55495,55501,55636,55752,56103,56272,56949,
chr1	11708885	11714375	gencode::FBXO2::ENSG00000116661.9	0	-	11708885	11714375	0	10	2,2,2,2,2,2,2,2,2,2,	0,256,397,948,1046,1114,1246,1635,2006,5488,
chr1	11714638	11721186	gencode::FBXO44::ENSG00000132879.9	0	+	11714638	11721186	0	14	2,2,2,2,2,2,2,2,2,2,2,2,2,2,	0,371,744,1086,1118,1222,1519,3683,3812,3949,4047,4152,4290,6546,
chr1	11724312	11733671	gencode::FBXO6::ENSG00000116663.6	0	+	11724312	11733671	0	10	2,2,2,2,2,2,2,2,2,2,	0,4398,4689,7008,7137,7670,7768,9019,9157,9357,
chr1	11734873	11751469	gencode::MAD2L2::ENSG00000116670.10	0	-	11734873	11751469	0	20	2,2,2,2,2,2,2,2,2,2,2,2,2,2,2,2,2,2,2,2,	0,263,358,839,915,1227,1324,1990,2132,2724,2798,5534,5655,5743,5797,6220,6622,6919,7200,16594,
chr1	11751910	11779640	gencode::DRAXIN::ENSG00000162490.6	0	+	11751910	11779640	0	12	2,2,2,2,2,2,2,2,2,2,2,2,	0,14393,14856,17419,17612,19995,20112,20484,20576,23263,23355,27728,
chr1	11796292	11810133	gencode::AGTRAP::ENSG00000177674.11	0	+	11796292	11810133	0	12	2,2,2,2,2,2,2,2,2,2,2,2,	0,8295,8333,9565,9602,9889,9988,11202,11310,12177,12375,13839,
chr1	11822331	11849326	gencode::C1orf167::ENSG00000215910.3	0	+	11822331	11849326	0	41	2,2,2,2,2,2,2,2,2,2,2,2,2,2,2,2,2,2,2,2,2,2,2,2,2,2,2,2,2,2,2,2,2,2,2,2,2,2,2,2,2,	0,2054,2208,3580,4302,4459,4687,4811,4944,4990,5800,6045,9247,9362,9805,9985,13158,13336,14187,14364,16383,16542,16649,16806,17525,17736,19912,20059,21897,22319,22871,23015,25111,25219,25596,25773,25872,26104,26375,26472,26993,
chr1	11850955	11865944	gencode::MTHFR::ENSG00000177000.6	0	-	11850955	11865944	0	25	2,2,2,2,2,2,2,2,2,2,2,2,2,2,2,2,2,2,2,2,2,2,2,2,2,	0,306,428,1377,1481,3006,3191,3457,3640,3828,3965,4197,4450,5305,5501,9311,9424,10260,10501,11980,12231,12504,13634,14479,14987,
chr1	11866406	11900199	gencode::CLCN6::ENSG00000011021.17	0	+	11866406	11900199	0	44	2,2,2,2,2,2,2,2,2,2,2,2,2,2,2,2,2,2,2,2,2,2,2,2,2,2,2,2,2,2,2,2,2,2,2,2,2,2,2,2,2,2,2,2,	0,779,841,9494,9562,10263,10331,13136,13205,14010,16343,16452,17355,17484,18134,18204,19804,19865,20737,20872,21754,21870,22106,22275,22844,22973,27163,27289,27525,27681,27884,28046,28132,28241,29615,29804,30647,30807,30991,31150,31983,32093,32183,33791,
chr1	11906071	11908137	gencode::NPPA::ENSG00000175206.6	0	-	11906071	11908137	0	5	2,2,2,2,2,	0,1096,1425,1545,2064,
chr1	11917728	11918758	gencode::NPPB::ENSG00000120937.8	0	-	11917728	11918758	0	4	2,2,2,2,	0,540,798,1028,
chr1	11980389	11985261	gencode::KIAA2013::ENSG00000116685.11	0	-	11980389	11985261	0	3	2,2,2,	0,3157,4870,
chr1	11994912	12034709	gencode::PLOD1::ENSG00000083444.12	0	+	11994912	12034709	0	38	2,2,2,2,2,2,2,2,2,2,2,2,2,2,2,2,2,2,2,2,2,2,2,2,2,2,2,2,2,2,2,2,2,2,2,2,2,2,	0,9664,9807,13118,13212,14915,15051,15499,15665,17765,17880,19972,20038,22059,22159,22984,23088,23658,23792,25788,25912,28674,28781,29317,29445,29786,29930,30622,30738,31393,31461,32129,32236,35812,35961,38014,38142,39795,
chr1	12040541	12071552	gencode::MFN2::ENSG00000116688.12	0	+	12040541	12071552	0	36	2,2,2,2,2,2,2,2,2,2,2,2,2,2,2,2,2,2,2,2,2,2,2,2,2,2,2,2,2,2,2,2,2,2,2,2,	0,1483,1630,8678,8859,12068,12206,15669,15834,16810,16937,18283,18394,18501,18611,20914,21070,21282,21352,21495,21619,23505,23634,24022,24129,24338,24443,25224,25447,26051,26209,26566,26765,29105,29242,31009,
chr1	12079609	12091778	gencode::MIIP::ENSG00000116691.6	0	+	12079609	12091778	0	18	2,2,2,2,2,2,2,2,2,2,2,2,2,2,2,2,2,2,	0,2090,2288,2540,2890,3278,3365,9478,9589,9668,9729,10210,10342,10473,10572,11711,11851,12167,
chr1	12123718	12202343	gencode::TNFRSF8::ENSG00000120949.10	0	+	12123718	12202343	0	28	2,2,2,2,2,2,2,2,2,2,2,2,2,2,2,2,2,2,2,2,2,2,2,2,2,2,2,2,	0,20800,20890,33437,33556,40715,40870,45902,45995,46377,46543,48234,48353,51913,52068,59620,59716,60051,60166,62287,62391,62519,62575,71924,71952,74565,74775,78623,
chr1	12227226	12266796	gencode::TNFRSF1B::ENSG00000028137.12	0	+	12227226	12266796	0	19	2,2,2,2,2,2,2,2,2,2,2,2,2,2,2,2,2,2,2,	0,21624,21726,23785,23916,24602,24754,25176,25259,25355,25691,25929,26783,26863,27412,27449,34795,35002,39568,
chr1	12290177	12568946	gencode::VPS13D::ENSG00000048707.9	0	+	12290177	12568946	0	141	2,2,2,2,2,2,2,2,2,2,2,2,2,2,2,2,2,2,2,2,2,2,2,2,2,2,2,2,2,2,2,2,2,2,2,2,2,2,2,2,2,2,2,2,2,2,2,2,2,2,2,2,2,2,2,2,2,2,2,2,2,2,2,2,2,2,2,2,2,2,2,2,2,2,2,2,2,2,2,2,2,2,2,2,2,2,2,2,2,2,2,2,2,2,2,2,2,2,2,2,2,2,2,2,2,2,2,2,2,2,2,2,2,2,2,2,2,2,2,2,2,2,2,2,2,2,2,2,2,2,2,2,2,2,2,2,2,2,2,2,2,	0,4068,4243,12390,12470,14123,14316,14414,14497,19100,19219,23599,23706,26210,26383,26864,26967,27812,27983,30570,30674,30825,31029,31778,31960,36758,36891,37722,37800,38583,38756,40871,41004,42880,43015,45702,47918,49376,49530,52582,53616,58100,58193,60875,61004,63401,63584,69079,69264,74383,74608,78308,78521,81331,81505,81690,81805,83992,84207,87949,88217,89374,89510,91686,91844,92413,92626,935…
chr1	12628453	12677158	gencode::DHRS3::ENSG00000162496.4	0	-	12628453	12677158	0	10	2,2,2,2,2,2,2,2,2,2,	0,4300,4428,10290,10531,10865,10987,12095,12241,48703,
chr1	12704733	12725971	gencode::AADACL4::ENSG00000204518.2	0	+	12704733	12725971	0	6	2,2,2,2,2,2,	0,6406,6625,17066,17132,21236,
chr1	12776347	12785188	gencode::AADACL3::ENSG00000188984.7	0	+	12776347	12785188	0	6	2,2,2,2,2,2,	0,3127,3346,4535,4601,8839,
chr1	12806489	12820702	gencode::C1orf158::ENSG00000157330.5	0	+	12806489	12820702	0	6	2,2,2,2,2,2,	0,9158,9274,12751,12931,14211,
chr1	12835297	12837153	gencode::PRAMEF12::ENSG00000116726.4	0	+	12835297	12837153	0	4	2,2,2,2,	0,386,964,1854,
chr1	12851623	12855586	gencode::PRAMEF1::ENSG00000116721.9	0	+	12851623	12855586	0	7	2,2,2,2,2,2,2,	0,1726,2040,2438,3019,3495,3961,
chr1	12885361	12891209	gencode::PRAMEF11::ENSG00000204513.5	0	-	12885361	12891209	0	6	2,2,2,2,2,2,	0,1744,2328,2993,3303,5846,
chr1	12908323	12908533	gencode::HNRNPCL1::ENSG00000179172.7	0	-	12908323	12908533	0	2	2,2,	0,208,
chr1	12917002	12921075	gencode::PRAMEF2::ENSG00000120952.4	0	+	12917002	12921075	0	6	2,2,2,2,2,2,	0,1835,2149,2543,3124,4071,
chr1	12939926	12945970	gencode::PRAMEF4::ENSG00000243073.3	0	-	12939926	12945970	0	6	2,2,2,2,2,2,	0,1746,2330,2994,3305,6042,
chr1	12953305	12958046	gencode::PRAMEF10::ENSG00000187545.5	0	-	12953305	12958046	0	6	2,2,2,2,2,2,	0,1109,1690,2084,2398,4739,
chr1	12976507	12979671	gencode::PRAMEF7::ENSG00000204510.1	0	+	12976507	12979671	0	6	2,2,2,2,2,2,	0,978,1292,1672,2250,3162,
chr1	12999066	13117673	gencode::PRAMEF6::ENSG00000232423.3	0	-	12999066	13117673	0	14	2,2,2,2,2,2,2,2,2,2,2,2,2,2,	0,1745,2329,2993,3304,6114,8274,110333,112077,112661,113325,113636,116446,118605,
chr1	13035835	13037807	gencode::PRAMEF22::ENSG00000204508.3	0	+	13035835	13037807	0	4	2,2,2,2,	0,384,965,1970,
chr1	13217249	13218999	gencode::PRAMEF26::ENSG00000229571.2	0	-	13217249	13218999	0	2	2,2,	0,1748,
chr1	13329406	13331378	gencode::PRAMEF3::ENSG00000204503.5	0	-	13329406	13331378	0	4	2,2,2,2,	0,1005,1586,1970,
chr1	13359896	13368171	gencode::PRAMEF5::ENSG00000204502.2	0	+	13359896	13368171	0	6	2,2,2,2,2,2,	0,4970,5281,5945,6529,8273,
chr1	13387543	13390707	gencode::PRAMEF8::ENSG00000182330.6	0	-	13387543	13390707	0	6	2,2,2,2,2,2,	0,912,1490,1870,2184,3162,
chr1	13421253	13427297	gencode::PRAMEF9::ENSG00000204501.2	0	+	13421253	13427297	0	6	2,2,2,2,2,2,	0,2731,3042,3711,4295,6042,
chr1	13448608	13452578	gencode::PRAMEF13::ENSG00000204495.3	0	-	13448608	13452578	0	6	2,2,2,2,2,2,	0,949,1530,1939,2253,3968,
chr1	13475262	13477235	gencode::PRAMEF18::ENSG00000204491.2	0	-	13475262	13477235	0	4	2,2,2,2,	0,1006,1587,1971,
chr1	13495570	13497569	gencode::PRAMEF16::ENSG00000204488.3	0	+	13495570	13497569	0	4	2,2,2,2,	0,394,975,1997,
chr1	13516160	13526311	gencode::PRAMEF21::ENSG00000204486.3	0	+	13516160	13526311	0	6	2,2,2,2,2,2,	0,5806,6099,7574,8155,10149,
chr1	13642050	13648094	gencode::PRAMEF15::ENSG00000157358.7	0	+	13642050	13648094	0	6	2,2,2,2,2,2,	0,2731,3042,3711,4295,6042,
chr1	13669463	13673433	gencode::PRAMEF14::ENSG00000204481.6	0	-	13669463	13673433	0	7	2,2,2,2,2,2,2,	0,949,1530,1939,2253,2333,3968,
chr1	13696098	13698071	gencode::PRAMEF19::ENSG00000204480.6	0	-	13696098	13698071	0	4	2,2,2,2,	0,1006,1587,1971,
chr1	13716404	13718403	gencode::PRAMEF17::ENSG00000204479.4	0	+	13716404	13718403	0	4	2,2,2,2,	0,394,975,1997,
chr1	13737001	13747171	gencode::PRAMEF20::ENSG00000204478.5	0	+	13737001	13747171	0	6	2,2,2,2,2,2,	0,5804,6097,7593,8174,10168,
chr1	13802567	13839457	gencode::LRRC38::ENSG00000162494.5	0	-	13802567	13839457	0	2	2,2,	0,36888,
chr1	13910595	13942399	gencode::PDPN::ENSG00000162493.12	0	+	13910595	13942399	0	16	2,2,2,2,2,2,2,2,2,2,2,2,2,2,2,2,	0,88,241,1468,1539,11724,11884,23070,23206,26284,26416,29584,29625,30197,30311,31802,
chr1	14026795	14149653	gencode::PRDM2::ENSG00000116731.18	0	+	14026795	14149653	0	22	2,2,2,2,2,2,2,2,2,2,2,2,2,2,2,2,2,2,2,2,2,2,	0,5345,15238,15314,30697,30817,32476,32582,41702,41857,49058,49187,68815,68873,72775,72888,78115,82531,86212,116124,116270,122856,
chr1	14925406	15440966	gencode::KAZN::ENSG00000189337.11	0	+	14925406	15440966	0	32	2,2,2,2,2,2,2,2,2,2,2,2,2,2,2,2,2,2,2,2,2,2,2,2,2,2,2,2,2,2,2,2,	0,70,313,325662,331134,347263,361771,361965,435836,435975,445076,445249,457178,457370,461259,461392,464659,464712,466717,495267,495475,495902,496023,502630,502864,504446,504550,505110,505279,513514,513631,515558,
chr1	15479280	15545821	gencode::TMEM51::ENSG00000171729.9	0	+	15479280	15545821	0	7	2,2,2,2,2,2,2,	0,1170,57703,57778,62108,62647,66539,
chr1	15490957	15497676	gencode::C1orf195::ENSG00000204464.3	0	-	15490957	15497676	0	3	2,2,2,	0,4316,6717,
chr1	15573891	15723792	gencode::FHAD1::ENSG00000142621.15	0	+	15573891	15723792	0	67	2,2,2,2,2,2,2,2,2,2,2,2,2,2,2,2,2,2,2,2,2,2,2,2,2,2,2,2,2,2,2,2,2,2,2,2,2,2,2,2,2,2,2,2,2,2,2,2,2,2,2,2,2,2,2,2,2,2,2,2,2,2,2,2,2,2,2,	0,4373,4482,24925,25134,42001,42271,49286,49398,53807,54046,58424,61215,61341,65659,65792,68980,69072,70426,70533,77054,77164,79661,79747,80879,81034,81948,94338,94498,97685,97795,98018,98128,101644,101754,105479,105589,110712,110888,113080,113308,115244,115331,118429,118538,120065,120227,121972,122107,127104,127236,128205,128335,133303,133401,133833,134056,134630,134798,136409,136535,140653,1407…
chr1	15736775	15755088	gencode::EFHD2::ENSG00000142634.8	0	+	15736775	15755088	0	6	2,2,2,2,2,2,	0,15589,15739,16868,17005,18311,
chr1	15765000	15773069	gencode::CTRC::ENSG00000162438.7	0	+	15765000	15773069	0	14	2,2,2,2,2,2,2,2,2,2,2,2,2,2,	0,1793,1887,1986,2086,3940,4068,4911,5050,6098,6246,7089,7244,8067,
chr1	15783288	15798484	gencode::CELA2A::ENSG00000142615.7	0	+	15783288	15798484	0	14	2,2,2,2,2,2,2,2,2,2,2,2,2,2,	0,290,381,4765,4865,5937,6068,6590,6729,9203,9351,10590,10745,15194,
chr1	15802660	15817789	gencode::CELA2B::ENSG00000215704.5	0	+	15802660	15817789	0	14	2,2,2,2,2,2,2,2,2,2,2,2,2,2,	0,289,380,4930,5030,6097,6228,7096,7235,9733,9881,11117,11272,15127,
chr1	15819530	15851077	gencode::CASP9::ENSG00000132906.13	0	-	15819530	15851077	0	16	2,2,2,2,2,2,2,2,2,2,2,2,2,2,2,2,	0,966,2235,2417,11573,11723,12952,13044,13861,14040,14835,14872,25072,25360,31031,31545,
chr1	15853453	15894272	gencode::DNAJC16::ENSG00000116138.8	0	+	15853453	15894272	0	27	2,2,2,2,2,2,2,2,2,2,2,2,2,2,2,2,2,2,2,2,2,2,2,2,2,2,2,	0,2127,2314,7276,7345,9514,9856,17438,17625,19806,19913,21309,21470,32565,32698,35181,35367,36968,37153,37322,37401,38958,39041,39121,40138,40311,40817,
chr1	15900219	15911190	gencode::AGMAT::ENSG00000116771.5	0	-	15900219	15911190	0	12	2,2,2,2,2,2,2,2,2,2,2,2,	0,1030,1117,3958,4140,5132,5330,6367,6418,9466,9671,10969,
chr1	15944303	15986331	gencode::DDI2::ENSG00000197312.7	0	+	15944303	15986331	0	18	2,2,2,2,2,2,2,2,2,2,2,2,2,2,2,2,2,2,	0,8858,8990,12514,12753,15628,15757,20496,20626,25711,25842,31909,32015,33895,34087,38806,38871,42026,
chr1	16011113	16060291	gencode::PLEKHM2::ENSG00000116786.7	0	+	16011113	16060291	0	38	2,2,2,2,2,2,2,2,2,2,2,2,2,2,2,2,2,2,2,2,2,2,2,2,2,2,2,2,2,2,2,2,2,2,2,2,2,2,	0,31616,31725,32086,32198,33272,33374,33917,34007,35113,35302,36708,36770,40696,40927,42393,43214,43458,43530,43646,43739,44048,44115,44481,44572,45176,45311,45911,46104,46571,46639,47268,47430,47729,47911,47991,48110,49176,
chr1	16063358	16065718	gencode::SLC25A34::ENSG00000162461.7	0	+	16063358	16065718	0	8	2,2,2,2,2,2,2,2,	0,1063,1131,1227,1382,1728,1865,2358,
chr1	16069142	16074040	gencode::TMEM82::ENSG00000162460.6	0	+	16069142	16074040	0	10	2,2,2,2,2,2,2,2,2,2,	0,185,260,370,547,1510,1933,4217,4407,4896,
chr1	16083227	16111042	gencode::FBLIM1::ENSG00000162458.8	0	+	16083227	16111042	0	19	2,2,2,2,2,2,2,2,2,2,2,2,2,2,2,2,2,2,2,	0,1439,1597,2116,7758,7761,7953,8229,8501,10641,10831,11793,11898,13674,13846,17883,20435,20555,27813,
chr1	16174645	16265790	gencode::SPEN::ENSG00000065526.6	0	+	16174645	16265790	0	28	2,2,2,2,2,2,2,2,2,2,2,2,2,2,2,2,2,2,2,2,2,2,2,2,2,2,2,2,	0,24663,24986,28049,28528,61168,61331,62948,63151,67975,68129,70773,70901,71251,71367,72717,72833,74096,74199,79938,88116,89010,89495,89659,89856,90565,90726,91143,
chr1	16268747	16302477	gencode::ZBTB17::ENSG00000116809.7	0	-	16268747	16302477	0	29	2,2,2,2,2,2,2,2,2,2,2,2,2,2,2,2,2,2,2,2,2,2,2,2,2,2,2,2,2,	0,76,189,274,486,809,942,1144,1267,1344,1463,1553,1643,2348,2442,2587,2682,2950,3460,3588,3899,4064,4680,4871,6036,6245,30784,30873,33728,
chr1	16330880	16332413	gencode::C1orf64::ENSG00000183888.4	0	+	16330880	16332413	0	2	2,2,	0,1531,
chr1	16342254	16345628	gencode::HSPB7::ENSG00000173641.13	0	-	16342254	16345628	0	6	2,2,2,2,2,2,	0,1312,1463,1604,1825,3372,
chr1	16348413	16360105	gencode::CLCNKA::ENSG00000186510.7	0	+	16348413	16360105	0	40	2,2,2,2,2,2,2,2,2,2,2,2,2,2,2,2,2,2,2,2,2,2,2,2,2,2,2,2,2,2,2,2,2,2,2,2,2,2,2,2,	0,70,145,692,801,1879,2010,2842,2973,4187,4329,4615,4695,4776,4857,5389,5517,5900,5987,6097,6201,6840,6927,7205,7381,7810,7882,8044,8157,8540,8756,9789,9925,10282,10373,10522,10608,11249,11338,11690,
chr1	16370375	16383363	gencode::CLCNKB::ENSG00000184908.13	0	+	16370375	16383363	0	37	2,2,2,2,2,2,2,2,2,2,2,2,2,2,2,2,2,2,2,2,2,2,2,2,2,2,2,2,2,2,2,2,2,2,2,2,2,	0,603,712,1675,1806,2652,2783,4022,4164,4460,4540,4621,4702,5365,5735,5822,5932,6036,6633,6720,6992,7168,7595,7667,7827,7940,8315,8531,9756,9892,11552,11643,11792,11878,12539,12628,12986,
chr1	16385212	16399915	gencode::FAM131C::ENSG00000185519.8	0	-	16385212	16399915	0	12	2,2,2,2,2,2,2,2,2,2,2,2,	0,774,887,1149,1334,3379,3475,3779,3817,4801,4919,14701,
chr1	16451815	16482342	gencode::EPHA2::ENSG00000142627.9	0	-	16451815	16482342	0	32	2,2,2,2,2,2,2,2,2,2,2,2,2,2,2,2,2,2,2,2,2,2,2,2,2,2,2,2,2,2,2,2,	0,4111,4269,4903,5099,6398,6550,6741,6953,7055,7119,7857,8048,8158,8286,8537,8595,9145,9247,9713,9869,10332,10450,12530,12865,12952,13110,23055,23727,25573,25643,30525,
chr1	16525239	16538996	gencode::ARHGEF19::ENSG00000142632.12	0	-	16525239	16538996	0	30	2,2,2,2,2,2,2,2,2,2,2,2,2,2,2,2,2,2,2,2,2,2,2,2,2,2,2,2,2,2,	0,403,510,3035,3117,3669,3830,6012,6175,6340,6432,6604,6681,6791,6923,7184,7339,7433,7596,8201,8466,8775,8854,8928,9033,9197,9481,9896,10339,13755,
chr1	16555558	16555977	gencode::C1orf134::ENSG00000204377.3	0	-	16555558	16555977	0	2	2,2,	0,417,
chr1	16558792	16563125	gencode::RSG1::ENSG00000132881.7	0	-	16558792	16563125	0	8	2,2,2,2,2,2,2,2,	0,210,349,593,720,1312,1467,4331,
chr1	16578280	16678749	gencode::FBXO42::ENSG00000037637.6	0	-	16578280	16678749	0	18	2,2,2,2,2,2,2,2,2,2,2,2,2,2,2,2,2,2,	0,500,619,1308,1367,1847,1946,3923,4036,4818,4974,42995,43132,54015,54134,63381,63650,100467,
chr1	16693803	16721532	gencode::SZRD1::ENSG00000055070.12	0	+	16693803	16721532	0	6	2,2,2,2,2,2,	0,24064,24116,25917,26174,27727,
chr1	16725317	16763622	gencode::SPATA21::ENSG00000187144.7	0	-	16725317	16763622	0	31	2,2,2,2,2,2,2,2,2,2,2,2,2,2,2,2,2,2,2,2,2,2,2,2,2,2,2,2,2,2,2,	0,519,699,1895,2070,4902,5022,5143,5217,6142,6282,10293,10381,10776,11221,11953,12093,22684,22735,23086,23149,26388,26699,26909,29039,29193,32418,32600,33965,34102,38303,
chr1	16767348	16786271	gencode::NECAP2::ENSG00000157191.15	0	+	16767348	16786271	0	16	2,2,2,2,2,2,2,2,2,2,2,2,2,2,2,2,	0,2776,2879,7014,7121,7204,7288,8237,8348,10982,11162,14962,15040,17986,18197,18921,
chr1	16890681	16939832	gencode::NBPF1::ENSG00000219481.6	0	-	16890681	16939832	0	56	2,2,2,2,2,2,2,2,2,2,2,2,2,2,2,2,2,2,2,2,2,2,2,2,2,2,2,2,2,2,2,2,2,2,2,2,2,2,2,2,2,2,2,2,2,2,2,2,2,2,2,2,2,2,2,2,	0,618,732,1444,1619,2219,2273,2990,3165,3790,3844,4884,5050,8953,9007,10298,10506,10968,11043,12078,12295,13128,13233,15004,15216,16556,16770,17231,17306,18355,18572,19405,19510,21300,21512,22861,23075,23536,23611,24660,24877,25710,25815,27658,27870,27970,28127,29252,29381,30403,30475,30742,30823,44319,44593,49149,
chr1	17248573	17298854	gencode::CROCC::ENSG00000058453.12	0	+	17248573	17298854	0	72	2,2,2,2,2,2,2,2,2,2,2,2,2,2,2,2,2,2,2,2,2,2,2,2,2,2,2,2,2,2,2,2,2,2,2,2,2,2,2,2,2,2,2,2,2,2,2,2,2,2,2,2,2,2,2,2,2,2,2,2,2,2,2,2,2,2,2,2,2,2,2,2,	0,582,720,2244,2401,7765,7953,8043,8129,8205,8269,8348,8516,9210,9319,14556,14795,15560,15659,16319,16405,16828,17064,17813,18015,22019,22204,23381,23528,24178,24327,24680,24913,26250,26446,26718,26848,28872,29044,31221,31403,32142,32279,32653,32799,33231,33472,33916,34078,36502,36672,38677,39052,43642,43814,43918,44041,44327,44493,46122,46340,47035,47262,47704,47856,48172,48375,48555,48689,49384…
chr1	17301518	17307081	gencode::MFAP2::ENSG00000117122.9	0	-	17301518	17307081	0	16	2,2,2,2,2,2,2,2,2,2,2,2,2,2,2,2,	0,243,319,617,707,1475,1522,1682,1771,1871,1900,2083,2175,3211,3291,5561,
chr1	17312853	17338223	gencode::ATP13A2::ENSG00000159363.13	0	-	17312853	17338223	0	56	2,2,2,2,2,2,2,2,2,2,2,2,2,2,2,2,2,2,2,2,2,2,2,2,2,2,2,2,2,2,2,2,2,2,2,2,2,2,2,2,2,2,2,2,2,2,2,2,2,2,2,2,2,2,2,2,	0,102,274,444,598,685,911,1777,1876,1961,2116,3330,3412,3526,3645,3766,3929,5373,5500,5648,5771,5882,6044,6125,6223,7268,7477,9615,9806,9893,9942,10025,10138,10659,10817,13650,13784,13885,13954,14039,14176,15673,15745,15935,16015,17971,18053,18331,18463,18653,18714,19013,19198,19323,19420,25368,
chr1	17345453	17380442	gencode::SDHB::ENSG00000117118.5	0	-	17345453	17380442	0	14	2,2,2,2,2,2,2,2,2,2,2,2,2,2,	0,3647,3772,5012,5116,8788,8907,9639,9778,14099,14187,25800,25930,34987,
chr1	17395772	17445774	gencode::PADI2::ENSG00000117115.8	0	-	17395772	17445774	0	29	2,2,2,2,2,2,2,2,2,2,2,2,2,2,2,2,2,2,2,2,2,2,2,2,2,2,2,2,2,	0,808,939,2126,2214,5576,5672,6399,6546,10138,13265,13375,14446,14560,15319,15425,17241,17422,23128,23256,24287,24407,26629,26693,33707,33782,35598,35784,50000,
chr1	17531804	17570504	gencode::PADI1::ENSG00000142623.8	0	+	17531804	17570504	0	31	2,2,2,2,2,2,2,2,2,2,2,2,2,2,2,2,2,2,2,2,2,2,2,2,2,2,2,2,2,2,2,	0,16978,17161,18309,18384,19055,19119,20499,20619,20721,20849,23313,23488,23636,23742,24773,24899,25260,25370,27507,27661,28129,32002,32149,33304,33400,34392,34474,35323,35451,38698,
chr1	17575724	17609340	gencode::PADI3::ENSG00000142619.4	0	+	17575724	17609340	0	30	2,2,2,2,2,2,2,2,2,2,2,2,2,2,2,2,2,2,2,2,2,2,2,2,2,2,2,2,2,2,	0,10346,10529,12901,12976,16427,16491,17487,17607,18605,18733,21001,21182,21647,21753,21835,21949,24108,24218,25403,25557,27287,27434,27542,27647,31118,31200,31439,31567,33614,
chr1	17634809	17690016	gencode::PADI4::ENSG00000159339.9	0	+	17634809	17690016	0	31	2,2,2,2,2,2,2,2,2,2,2,2,2,2,2,2,2,2,2,2,2,2,2,2,2,2,2,2,2,2,2,	0,22652,22835,25626,25695,26007,27842,27912,29721,29841,31371,31499,33626,33807,33982,34088,37711,37825,39624,39734,46216,46373,47666,47813,48040,48145,50521,50594,50963,51094,55205,
chr1	17655529	17675981	gencode::AC004824.2::ENSG00000269468.1	0	-	17655529	17675981	0	10	2,2,2,2,2,2,2,2,2,2,	0,2594,2690,8685,8755,13814,13859,13862,13886,20450,
chr1	17735690	17766040	gencode::RCC2::ENSG00000179051.9	0	-	17735690	17766040	0	24	2,2,2,2,2,2,2,2,2,2,2,2,2,2,2,2,2,2,2,2,2,2,2,2,	0,777,857,2925,3000,3876,3984,4340,4523,7283,7452,11517,11634,13006,13097,13508,13642,16344,16490,19909,20005,29033,29328,30348,
chr1	17866445	18023342	gencode::ARHGEF10L::ENSG00000074964.12	0	+	17866445	18023342	0	59	2,2,2,2,2,2,2,2,2,2,2,2,2,2,2,2,2,2,2,2,2,2,2,2,2,2,2,2,2,2,2,2,2,2,2,2,2,2,2,2,2,2,2,2,2,2,2,2,2,2,2,2,2,2,2,2,2,2,2,	0,40600,40682,47507,47695,48493,48529,62174,62268,63555,63641,67849,68027,73105,73224,76141,76252,78572,79386,79495,81911,81991,83043,83225,84434,84553,86003,86098,87377,87553,92368,92516,94595,94612,94882,95066,97935,98053,98609,98739,99879,100249,100352,108601,108725,114683,114772,115926,116152,116601,116758,124494,124645,147620,147797,151167,155205,155330,156895,
chr1	18081999	18152261	gencode::ACTL8::ENSG00000117148.6	0	+	18081999	18152261	0	4	2,2,2,2,	0,67478,67852,70260,
chr1	18434692	18704749	gencode::IGSF21::ENSG00000117154.7	0	+	18434692	18704749	0	18	2,2,2,2,2,2,2,2,2,2,2,2,2,2,2,2,2,2,	0,119697,119812,183665,183789,226691,226812,253914,254032,257022,257499,268109,268197,268599,268794,269192,269233,270055,
chr1	18958182	19071307	gencode::PAX7::ENSG00000009709.7	0	+	18958182	19071307	0	15	2,2,2,2,2,2,2,2,2,2,2,2,2,2,2,	0,2612,2850,3420,3552,4546,4683,60063,60265,68962,69130,71403,71608,103941,113123,
chr1	19167021	19185972	gencode::TAS1R2::ENSG00000179002.5	0	-	19167021	19185972	0	10	2,2,2,2,2,2,2,2,2,2,	0,1199,1325,8811,9023,13683,14459,16801,17104,18949,
chr1	19198284	19228955	gencode::ALDH4A1::ENSG00000159423.12	0	-	19198284	19228955	0	31	2,2,2,2,2,2,2,2,2,2,2,2,2,2,2,2,2,2,2,2,2,2,2,2,2,2,2,2,2,2,2,	0,1011,1167,2670,2791,3589,3713,4522,4677,5415,5465,5623,5822,7507,7583,9907,10097,11331,11408,11486,11638,13680,13838,14671,14721,17569,17664,18219,18315,18901,30669,
chr1	19235160	19282161	gencode::IFFO2::ENSG00000169991.6	0	-	19235160	19282161	0	16	2,2,2,2,2,2,2,2,2,2,2,2,2,2,2,2,	0,1673,1806,2715,2810,3294,3417,8234,8376,9693,9836,11009,11107,12392,12455,46999,
chr1	19401390	19536566	gencode::UBR4::ENSG00000127481.10	0	-	19401390	19536566	0	214	2,2,2,2,2,2,2,2,2,2,2,2,2,2,2,2,2,2,2,2,2,2,2,2,2,2,2,2,2,2,2,2,2,2,2,2,2,2,2,2,2,2,2,2,2,2,2,2,2,2,2,2,2,2,2,2,2,2,2,2,2,2,2,2,2,2,2,2,2,2,2,2,2,2,2,2,2,2,2,2,2,2,2,2,2,2,2,2,2,2,2,2,2,2,2,2,2,2,2,2,2,2,2,2,2,2,2,2,2,2,2,2,2,2,2,2,2,2,2,2,2,2,2,2,2,2,2,2,2,2,2,2,2,2,2,2,2,2,2,2,2,2,2,2,2,2,2,2,2,2,2,2,2,2,2,2,2,2,2,2,2,2,2,2,2,2,2,2,2,2,2,2,2,2,2,2,2,2,2,2,2,2,2,2,2,2,2,2,2,2,2,2,2,2,2,2,2,2,2,2…	0,1841,2006,2886,2951,3077,3170,6450,9605,9802,11246,11374,11780,11925,12917,13033,13860,14081,17920,18022,18414,18590,19050,19243,20007,20129,20646,20756,21624,21754,22294,22384,24698,24781,25477,25677,26621,26745,29185,29361,29686,29770,30149,30293,30834,30946,31670,31830,31938,32070,35197,35327,35481,35568,35843,35936,37625,37971,38800,38931,39174,39912,40053,40499,40741,42322,42518,42924,4301…
chr1	19545976	19577908	gencode::EMC1::ENSG00000127463.9	0	-	19545976	19577908	0	43	2,2,2,2,2,2,2,2,2,2,2,2,2,2,2,2,2,2,2,2,2,2,2,2,2,2,2,2,2,2,2,2,2,2,2,2,2,2,2,2,2,2,2,	0,84,216,1279,1366,3139,3352,3911,4087,7828,7968,11359,11481,11776,11940,13139,13291,13451,13653,15645,15770,17657,17756,18532,18657,19310,19375,19746,19820,20333,20503,20812,20964,21531,21660,22860,22991,24129,24225,24465,24533,25548,31930,
chr1	19578357	19585174	gencode::MRTO4::ENSG00000053372.4	0	+	19578357	19585174	0	14	2,2,2,2,2,2,2,2,2,2,2,2,2,2,	0,2916,2977,4082,4188,5198,5282,5588,5658,5967,6121,6611,6690,6815,
chr1	19593955	19600354	gencode::AKR7L::ENSG00000211454.9	0	-	19593955	19600354	0	8	2,2,2,2,2,2,2,2,	0,1108,1240,2987,3094,3284,3474,6397,
chr1	19609386	19614989	gencode::AKR7A3::ENSG00000162482.4	0	-	19609386	19614989	0	12	2,2,2,2,2,2,2,2,2,2,2,2,	0,1101,1233,1791,1893,2123,2222,2993,3100,3290,3480,5601,
chr1	19630880	19638320	gencode::AKR7A2::ENSG00000053371.8	0	-	19630880	19638320	0	12	2,2,2,2,2,2,2,2,2,2,2,2,	0,1629,1761,2613,2715,2925,3024,3769,3876,4066,4256,7438,
chr1	19638852	19655065	gencode::PQLC2::ENSG00000040487.8	0	+	19638852	19655065	0	16	2,2,2,2,2,2,2,2,2,2,2,2,2,2,2,2,	0,368,531,5239,5483,12272,12404,13134,13224,13884,14029,14170,14265,14866,15054,16211,
chr1	19666111	19811929	gencode::CAPZB::ENSG00000077549.13	0	-	19666111	19811929	0	21	2,2,2,2,2,2,2,2,2,2,2,2,2,2,2,2,2,2,2,2,2,	0,3132,3247,4738,4817,5567,5635,17015,17134,17802,17946,38920,39036,45885,46009,80041,80133,109214,109713,144570,145816,
chr1	19923603	19952880	gencode::MINOS1::ENSG00000173436.9	0	+	19923603	19952880	0	6	2,2,2,2,2,2,	0,24988,25038,26362,26474,29275,
chr1	19923603	19983358	gencode::MINOS1-NBL1::ENSG00000270136.1	0	+	19923603	19983358	0	6	2,2,2,2,2,2,	0,57899,58090,58211,58325,59753,
chr1	19969891	19983358	gencode::NBL1::ENSG00000158747.9	0	+	19969891	19983358	0	7	2,2,2,2,2,2,2,	0,1049,11611,11802,11923,12037,13465,
chr1	19992960	20005411	gencode::HTR6::ENSG00000158748.3	0	+	19992960	20005411	0	4	2,2,2,2,	0,12097,12258,12449,
chr1	20009207	20126347	gencode::TMCO4::ENSG00000162542.9	0	-	20009207	20126347	0	32	2,2,2,2,2,2,2,2,2,2,2,2,2,2,2,2,2,2,2,2,2,2,2,2,2,2,2,2,2,2,2,2,	0,730,11717,11837,18051,18171,54655,54742,57107,57246,58060,58227,62815,62937,63739,63885,64446,64546,72917,73052,87825,87855,88591,88768,97863,98052,104309,104403,115420,115501,116457,117138,
chr1	20209227	20234062	gencode::OTUD3::ENSG00000169914.5	0	+	20209227	20234062	0	14	2,2,2,2,2,2,2,2,2,2,2,2,2,2,	0,7648,7799,11631,11746,14803,14928,21530,21664,22154,22253,23695,23882,24833,
chr1	20246942	20250012	gencode::PLA2G2E::ENSG00000188784.4	0	-	20246942	20250012	0	6	2,2,2,2,2,2,	0,1846,1955,2165,2306,3068,
chr1	20302336	20306854	gencode::PLA2G2A::ENSG00000188257.6	0	-	20302336	20306854	0	10	2,2,2,2,2,2,2,2,2,2,	0,2169,2278,2534,2681,2888,3036,3734,3847,4516,
chr1	20396958	20417060	gencode::PLA2G5::ENSG00000127472.6	0	+	20396958	20417060	0	8	2,2,2,2,2,2,2,2,	0,14353,14405,15615,15762,19321,19430,20100,
chr1	20440752	20445951	gencode::PLA2G2D::ENSG00000117215.10	0	-	20440752	20445951	0	6	2,2,2,2,2,2,	0,1245,1354,2071,2218,5197,
chr1	20466036	20474682	gencode::PLA2G2F::ENSG00000158786.4	0	+	20466036	20474682	0	8	2,2,2,2,2,2,2,2,	0,620,675,3900,4047,5034,5146,8644,
chr1	20490650	20503816	gencode::PLA2G2C::ENSG00000187980.6	0	-	20490650	20503816	0	5	2,2,2,2,2,	0,8634,8740,10847,13164,
chr1	20512646	20517039	gencode::UBXN10::ENSG00000162543.5	0	+	20512646	20517039	0	2	2,2,	0,4391,
chr1	20617581	20680249	gencode::VWA5B1::ENSG00000158816.11	0	+	20617581	20680249	0	44	2,2,2,2,2,2,2,2,2,2,2,2,2,2,2,2,2,2,2,2,2,2,2,2,2,2,2,2,2,2,2,2,2,2,2,2,2,2,2,2,2,2,2,2,	0,19485,19652,21745,21900,23231,23504,26439,26587,27499,27633,28291,28418,32265,32444,36799,36912,39089,39294,39778,39895,41675,41863,45212,45398,46555,46748,46884,51341,51521,51988,52305,54365,54505,57157,57288,58007,59065,59142,59766,59838,60964,61084,62666,
chr1	20810212	20811706	gencode::CAMK2N1::ENSG00000162545.5	0	-	20810212	20811706	0	2	2,2,	0,1492,
chr1	20827912	20834397	gencode::MUL1::ENSG00000090432.5	0	-	20827912	20834397	0	6	2,2,2,2,2,2,	0,647,770,1800,1890,6483,
chr1	20915776	20944944	gencode::CDA::ENSG00000158825.5	0	+	20915776	20944944	0	6	2,2,2,2,2,2,	0,15642,15756,24556,24616,29166,
chr1	20960428	20976926	gencode::PINK1::ENSG00000158828.5	0	+	20960428	20976926	0	14	2,2,2,2,2,2,2,2,2,2,2,2,2,2,	0,3904,4194,5954,6057,10552,10737,11622,11788,14567,14697,15057,15296,16496,
chr1	20979021	20987689	gencode::DDOST::ENSG00000244038.5	0	-	20979021	20987689	0	20	2,2,2,2,2,2,2,2,2,2,2,2,2,2,2,2,2,2,2,2,	0,90,199,320,443,1096,1246,1692,1843,2083,2179,2909,3006,3145,3251,3570,3659,8350,8463,8666,
chr1	20991255	21043968	gencode::KIF17::ENSG00000117245.8	0	-	20991255	21043968	0	29	2,2,2,2,2,2,2,2,2,2,2,2,2,2,2,2,2,2,2,2,2,2,2,2,2,2,2,2,2,	0,1449,1569,5656,5729,7173,7434,17888,18122,20044,20258,21281,21364,22623,23182,25423,25573,33614,33726,39682,40137,44874,45066,48689,48793,50728,50877,52584,52711,
chr1	21048488	21058673	gencode::SH2D5::ENSG00000189410.7	0	-	21048488	21058673	0	18	2,2,2,2,2,2,2,2,2,2,2,2,2,2,2,2,2,2,	0,758,920,1628,1739,2085,2256,2398,2640,3922,4071,5003,5080,5525,5608,5960,6091,10183,
chr1	21071584	21113141	gencode::HP1BP3::ENSG00000127483.13	0	-	21071584	21113141	0	26	2,2,2,2,2,2,2,2,2,2,2,2,2,2,2,2,2,2,2,2,2,2,2,2,2,2,	0,449,565,2450,2564,4629,4791,12072,12165,20283,20440,22490,22573,25836,25982,28357,28519,30914,31503,31659,34718,34820,35251,35449,41420,41555,
chr1	21133993	21503214	gencode::EIF4G3::ENSG00000075151.15	0	-	21133993	21503214	0	80	2,2,2,2,2,2,2,2,2,2,2,2,2,2,2,2,2,2,2,2,2,2,2,2,2,2,2,2,2,2,2,2,2,2,2,2,2,2,2,2,2,2,2,2,2,2,2,2,2,2,2,2,2,2,2,2,2,2,2,2,2,2,2,2,2,2,2,2,2,2,2,2,2,2,2,2,2,2,2,2,	0,3235,3384,5655,5739,9889,10038,17597,17698,20114,20198,21644,21772,33353,33528,41912,42030,43755,43978,46057,46177,47475,47571,49900,49997,52882,53017,54725,54832,56973,57212,57613,57762,71820,72020,78698,78871,85116,85229,86136,87865,88001,92194,92443,97380,97471,133756,133895,133988,134830,142500,142611,161971,162096,165499,165599,172831,172948,173545,173727,174885,174908,190098,190133,195210…
chr1	21546624	21671868	gencode::ECE1::ENSG00000117298.10	0	-	21546624	21671868	0	35	2,2,2,2,2,2,2,2,2,2,2,2,2,2,2,2,2,2,2,2,2,2,2,2,2,2,2,2,2,2,2,2,2,2,2,	0,1613,1711,5116,5309,7025,7095,7797,7910,13424,13530,15716,15796,16612,16713,18000,18113,24855,24972,27087,27232,35813,36007,37391,37459,38559,38708,40137,40261,52565,52780,59057,69936,70230,125242,
chr1	21766841	21809635	gencode::NBPF3::ENSG00000142794.14	0	+	21766841	21809635	0	34	2,2,2,2,2,2,2,2,2,2,2,2,2,2,2,2,2,2,2,2,2,2,2,2,2,2,2,2,2,2,2,2,2,2,	0,4597,4871,25736,25808,26645,26961,28090,28237,28337,28549,30281,30386,31218,31435,32492,32567,33029,33237,34549,34603,37718,37959,38998,39052,39700,39875,40579,40633,41246,41421,42133,42187,42792,
chr1	21836010	21903875	gencode::ALPL::ENSG00000162551.9	0	+	21836010	21903875	0	24	2,2,2,2,2,2,2,2,2,2,2,2,2,2,2,2,2,2,2,2,2,2,2,2,	0,41911,44458,44625,51106,51228,51577,51695,53590,53767,54521,54699,58584,58730,60785,60857,64145,64282,65226,66213,66407,67002,67124,67863,
chr1	21923757	21995746	gencode::RAP1GAP::ENSG00000076864.15	0	-	21923757	21995746	0	54	2,2,2,2,2,2,2,2,2,2,2,2,2,2,2,2,2,2,2,2,2,2,2,2,2,2,2,2,2,2,2,2,2,2,2,2,2,2,2,2,2,2,2,2,2,2,2,2,2,2,2,2,2,2,	0,419,464,694,800,1133,1238,2227,2353,4417,4533,5537,5649,6391,6648,8799,8933,10946,11086,11583,11672,12308,12382,12853,13011,14185,14317,14449,14552,14759,14845,15909,15965,16361,16442,16719,16825,20039,20227,20667,20708,21758,21808,22748,22786,25072,29037,29133,52494,52532,54512,67944,68053,71987,
chr1	22005932	22109316	gencode::USP48::ENSG00000090686.11	0	-	22005932	22109316	0	50	2,2,2,2,2,2,2,2,2,2,2,2,2,2,2,2,2,2,2,2,2,2,2,2,2,2,2,2,2,2,2,2,2,2,2,2,2,2,2,2,2,2,2,2,2,2,2,2,2,2,	0,1366,1395,7749,7800,10532,10660,15624,15782,22056,22163,24070,24179,24820,24953,26285,26398,26684,26748,27025,27150,27302,27468,35947,36018,41594,41727,42208,42325,44456,49280,50262,50393,57004,57186,67625,67710,68696,68832,72065,72176,73085,73212,73550,73680,77104,77263,78221,78344,103382,
chr1	22139029	22150402	gencode::LDLRAD2::ENSG00000187942.7	0	+	22139029	22150402	0	10	2,2,2,2,2,2,2,2,2,2,	0,1859,2287,3404,3538,8911,9075,9663,9897,11371,
chr1	22149981	22263647	gencode::HSPG2::ENSG00000142798.12	0	-	22149981	22263647	0	194	2,2,2,2,2,2,2,2,2,2,2,2,2,2,2,2,2,2,2,2,2,2,2,2,2,2,2,2,2,2,2,2,2,2,2,2,2,2,2,2,2,2,2,2,2,2,2,2,2,2,2,2,2,2,2,2,2,2,2,2,2,2,2,2,2,2,2,2,2,2,2,2,2,2,2,2,2,2,2,2,2,2,2,2,2,2,2,2,2,2,2,2,2,2,2,2,2,2,2,2,2,2,2,2,2,2,2,2,2,2,2,2,2,2,2,2,2,2,2,2,2,2,2,2,2,2,2,2,2,2,2,2,2,2,2,2,2,2,2,2,2,2,2,2,2,2,2,2,2,2,2,2,2,2,2,2,2,2,2,2,2,2,2,2,2,2,2,2,2,2,2,2,2,2,2,2,2,2,2,2,2,2,2,2,2,2,2,2,2,2,2,2,2,2,	0,125,231,630,716,815,888,1046,1127,1213,1291,4372,4431,4539,4664,4764,4938,5344,5591,5892,6116,6502,6603,7491,7602,7724,7836,7972,8074,8161,8308,9004,9118,9777,9896,9976,10126,10325,10437,11188,11457,12049,12149,13311,13518,15334,15597,15880,16062,16331,16529,17610,17797,18048,18185,18511,18654,18748,18892,19279,19433,19806,19950,20657,20811,22617,22767,22957,23111,23863,24004,24198,24352,24467,…
chr1	22303575	22315754	gencode::CELA3B::ENSG00000219073.3	0	+	22303575	22315754	0	14	2,2,2,2,2,2,2,2,2,2,2,2,2,2,	0,1284,1372,3739,3839,3953,4090,6609,6748,7104,7249,9446,9601,12177,
chr1	22328210	22338942	gencode::CELA3A::ENSG00000142789.15	0	+	22328210	22338942	0	13	2,2,2,2,2,2,2,2,2,2,2,2,2,	0,1283,1371,3727,3827,3942,5158,5297,5653,5798,7985,8140,10730,
chr1	22379235	22417920	gencode::CDC42::ENSG00000070831.11	0	+	22379235	22417920	0	15	2,2,2,2,2,2,2,2,2,2,2,2,2,2,2,	0,21349,21477,25684,25841,25961,26139,28977,29052,33694,33806,33924,34124,37198,38683,
chr1	22447010	22470224	gencode::WNT4::ENSG00000162552.10	0	-	22447010	22470224	0	9	2,2,2,2,2,2,2,2,2,	0,691,836,925,1059,9096,9334,22326,23212,
chr1	22778497	22852694	gencode::ZBTB40::ENSG00000184677.12	0	+	22778497	22852694	0	36	2,2,2,2,2,2,2,2,2,2,2,2,2,2,2,2,2,2,2,2,2,2,2,2,2,2,2,2,2,2,2,2,2,2,2,2,	0,652,942,37873,38641,39393,39529,49485,49680,50292,50437,54042,54237,55994,56133,56523,56727,57093,57229,59172,59343,59669,60130,60917,61126,65293,65460,68054,68271,69489,69654,70370,70459,72211,72440,74195,
chr1	22890123	22928119	gencode::EPHA8::ENSG00000070886.6	0	+	22890123	22928119	0	33	2,2,2,2,2,2,2,2,2,2,2,2,2,2,2,2,2,2,2,2,2,2,2,2,2,2,2,2,2,2,2,2,2,	0,3,99,5656,5723,12584,13250,22847,23005,25238,29693,29820,29891,30056,31597,31693,32473,32543,33679,33846,34043,34231,34518,34582,35205,35417,37028,37180,37265,37458,37667,37843,37994,
chr1	22963195	22965325	gencode::C1QA::ENSG00000173372.12	0	+	22963195	22965325	0	4	2,2,2,2,	0,905,1077,2128,
chr1	22970207	22973719	gencode::C1QC::ENSG00000159189.7	0	+	22970207	22973719	0	6	2,2,2,2,2,2,	0,23,172,294,490,3510,
chr1	22979796	22987304	gencode::C1QB::ENSG00000173369.11	0	+	22979796	22987304	0	4	2,2,2,2,	0,6134,6340,7506,
chr1	23037536	23240150	gencode::EPHB2::ENSG00000133216.12	0	+	23037536	23240150	0	32	2,2,2,2,2,2,2,2,2,2,2,2,2,2,2,2,2,2,2,2,2,2,2,2,2,2,2,2,2,2,2,2,	0,64201,70375,70442,73346,74033,151991,152149,153831,154169,171313,171440,180083,181835,182003,184426,184537,185365,185435,194941,195066,195664,195914,196907,197125,197976,198128,199336,199532,201398,202416,202612,
chr1	23280517	23291782	gencode::LACTBL1::ENSG00000215906.4	0	-	23280517	23291782	0	10	2,2,2,2,2,2,2,2,2,2,	0,1294,1402,4658,4896,5915,6075,9080,9192,11263,
chr1	23337594	23342264	gencode::C1orf234::ENSG00000227868.2	0	-	23337594	23342264	0	4	2,2,2,2,	0,2779,2944,4668,
chr1	23346440	23409671	gencode::KDM1A::ENSG00000004487.11	0	+	23346440	23409671	0	42	2,2,2,2,2,2,2,2,2,2,2,2,2,2,2,2,2,2,2,2,2,2,2,2,2,2,2,2,2,2,2,2,2,2,2,2,2,2,2,2,2,2,	0,10519,10687,24477,24539,30437,30573,33811,33892,35119,35214,35982,36091,37534,37618,39123,39220,39397,39411,46110,46124,48589,48734,49111,49204,51275,51412,52174,52250,53342,53456,57278,57413,59040,59230,59603,59720,61496,61626,62270,62419,63229,
chr1	23415546	23503983	gencode::LUZP1::ENSG00000169641.9	0	-	23415546	23503983	0	10	2,2,2,2,2,2,2,2,2,2,	0,1845,2134,5327,19966,20074,20155,79710,79971,88435,
chr1	23517006	23519569	gencode::HTR1D::ENSG00000179546.3	0	-	23517006	23519569	0	2	2,2,	0,2561,
chr1	23637559	23670703	gencode::HNRNPR::ENSG00000125944.14	0	-	23637559	23670703	0	21	2,2,2,2,2,2,2,2,2,2,2,2,2,2,2,2,2,2,2,2,2,	0,132,256,2484,2636,7414,7631,10459,10597,12487,12666,22449,22565,26685,26795,27421,27542,29783,29951,29954,33142,
chr1	23689714	23694560	gencode::ZNF436::ENSG00000125945.10	0	-	23689714	23694560	0	5	2,2,2,2,2,	0,3818,3947,4749,4844,
chr1	23697629	23698005	gencode::C1orf213::ENSG00000249087.3	0	+	23697629	23698005	0	2	2,2,	0,374,
chr1	23707967	23751057	gencode::TCEA3::ENSG00000204219.5	0	-	23707967	23751057	0	21	2,2,2,2,2,2,2,2,2,2,2,2,2,2,2,2,2,2,2,2,2,	0,2869,2943,5796,5945,12402,12559,16068,16127,16315,16481,22686,27187,27252,35772,35916,36427,36535,37600,37665,43088,
chr1	23756423	23810497	gencode::ASAP3::ENSG00000088280.14	0	-	23756423	23810497	0	48	2,2,2,2,2,2,2,2,2,2,2,2,2,2,2,2,2,2,2,2,2,2,2,2,2,2,2,2,2,2,2,2,2,2,2,2,2,2,2,2,2,2,2,2,2,2,2,2,	0,1102,1195,1763,1988,3144,3342,3492,3602,3693,3763,4321,4439,4600,4688,5918,6098,6627,6724,6978,7114,7197,7390,7491,7542,8814,8904,9228,9300,11169,11281,11454,11543,11722,11800,12253,12341,12568,12705,21546,21598,22764,22841,25948,26096,26189,26264,54072,
chr1	23836640	23857033	gencode::E2F2::ENSG00000007968.6	0	-	23836640	23857033	0	12	2,2,2,2,2,2,2,2,2,2,2,2,	0,6184,6379,8865,8982,10762,10923,11686,11908,14232,14340,20391,
chr1	23884906	23885617	gencode::ID3::ENSG00000117318.8	0	-	23884906	23885617	0	4	2,2,2,2,	0,517,604,709,
chr1	23954027	23966878	gencode::MDS2::ENSG00000197880.4	0	+	23954027	23966878	0	12	2,2,2,2,2,2,2,2,2,2,2,2,	0,241,461,967,1060,1941,2020,11569,11714,12140,12258,12849,
chr1	24018319	24022833	gencode::RPL11::ENSG00000142676.8	0	+	24018319	24022833	0	10	2,2,2,2,2,2,2,2,2,2,	0,777,930,1975,2084,2828,2962,3966,4079,4512,
chr1	24070068	24086001	gencode::TCEB3::ENSG00000011007.8	0	+	24070068	24086001	0	20	2,2,2,2,2,2,2,2,2,2,2,2,2,2,2,2,2,2,2,2,	0,5440,5499,6261,6370,7264,8452,8826,8940,10519,10677,10782,10882,12262,12445,12693,12807,13372,13547,15931,
chr1	24105203	24113764	gencode::PITHD1::ENSG00000057757.5	0	+	24105203	24113764	0	11	2,2,2,2,2,2,2,2,2,2,2,	0,722,768,1148,1228,6598,6959,7066,7599,7710,8559,
chr1	24117740	24121171	gencode::LYPLA2::ENSG00000011009.6	0	+	24117740	24121171	0	17	2,2,2,2,2,2,2,2,2,2,2,2,2,2,2,2,2,	0,1404,1510,1755,1789,1898,1966,2452,2502,2607,2680,2810,2886,2971,3174,3350,3429,
chr1	24122497	24126876	gencode::GALE::ENSG00000117308.10	0	-	24122497	24126876	0	22	2,2,2,2,2,2,2,2,2,2,2,2,2,2,2,2,2,2,2,2,2,2,	0,141,258,499,579,687,775,866,935,1024,1140,1685,1864,2107,2223,2605,2723,2877,3005,3356,3429,4377,
chr1	24129054	24164553	gencode::HMGCL::ENSG00000117305.10	0	-	24129054	24164553	0	19	2,2,2,2,2,2,2,2,2,2,2,2,2,2,2,2,2,2,2,	0,1833,1961,5568,5759,8169,8235,11623,11774,14108,14206,14909,15019,17943,18029,22789,23517,23619,35497,
chr1	24172345	24194387	gencode::FUCA1::ENSG00000179163.11	0	-	24172345	24194387	0	14	2,2,2,2,2,2,2,2,2,2,2,2,2,2,	0,216,318,2791,2984,8502,8705,13940,14048,17276,17416,19633,19770,22040,
chr1	24202152	24285412	gencode::CNR2::ENSG00000188822.6	0	-	24202152	24285412	0	5	2,2,2,2,2,	0,37581,73761,73840,83258,
chr1	24286488	24287929	gencode::PNRC2::ENSG00000189266.7	0	+	24286488	24287929	0	5	2,2,2,2,2,	0,928,932,1136,1439,
chr1	24294213	24306680	gencode::SRSF10::ENSG00000188529.10	0	-	24294213	24306680	0	12	2,2,2,2,2,2,2,2,2,2,2,2,	0,233,3716,3847,3903,4124,4289,7248,7354,10987,11094,12465,
chr1	24384117	24438520	gencode::MYOM3::ENSG00000142661.14	0	-	24384117	24438520	0	74	2,2,2,2,2,2,2,2,2,2,2,2,2,2,2,2,2,2,2,2,2,2,2,2,2,2,2,2,2,2,2,2,2,2,2,2,2,2,2,2,2,2,2,2,2,2,2,2,2,2,2,2,2,2,2,2,2,2,2,2,2,2,2,2,2,2,2,2,2,2,2,2,2,2,	0,1294,1352,3430,3455,3643,3682,4316,4482,5496,5607,5862,5903,6442,6532,8374,8432,8436,8477,9387,9467,10340,10402,10593,10740,13487,13626,14339,14386,16530,16642,17689,17848,18529,18646,22386,22567,23700,23829,24371,24561,24963,25087,26838,27012,29014,29200,31908,32038,32435,32491,33167,33369,34544,34688,35317,35481,37223,37363,37812,37859,40293,40384,42050,42148,48290,48450,49443,49605,50363,504…
chr1	24448227	24469529	gencode::IL22RA1::ENSG00000142677.3	0	-	24448227	24469529	0	12	2,2,2,2,2,2,2,2,2,2,2,2,	0,1562,1686,6401,6542,12471,12649,15391,15572,16842,16977,21300,
chr1	24484381	24514291	gencode::IFNLR1::ENSG00000185436.7	0	-	24484381	24514291	0	11	2,2,2,2,2,2,2,2,2,2,2,	0,1291,1580,1742,3793,11523,11710,22837,22963,29297,29908,
chr1	24646058	24690674	gencode::GRHL3::ENSG00000158055.11	0	+	24646058	24690674	0	33	2,2,2,2,2,2,2,2,2,2,2,2,2,2,2,2,2,2,2,2,2,2,2,2,2,2,2,2,2,2,2,2,2,	0,179,3549,11855,12044,15074,15138,16911,17259,17507,17583,18065,18221,18421,18535,20097,20194,22544,22705,23123,23204,23321,23457,25326,25363,26982,27073,27897,27985,30487,30554,34803,44614,
chr1	24685109	24741400	gencode::STPG1::ENSG00000001460.13	0	-	24685109	24741400	0	17	2,2,2,2,2,2,2,2,2,2,2,2,2,2,2,2,2,	0,2229,2422,11052,11220,15080,15191,21031,21204,25280,25384,32939,33060,42697,42837,55052,56289,
chr1	24742394	24795475	gencode::NIPAL3::ENSG00000001461.12	0	+	24742394	24795475	0	26	2,2,2,2,2,2,2,2,2,2,2,2,2,2,2,2,2,2,2,2,2,2,2,2,2,2,	0,3384,3736,17197,17309,24265,24336,26148,26322,29278,29340,33574,33722,37501,37600,38147,40231,40369,42981,43072,44574,44640,48119,48216,50097,53079,
chr1	24829640	24861582	gencode::RCAN3::ENSG00000117602.7	0	+	24829640	24861582	0	8	2,2,2,2,2,2,2,2,	0,11161,11417,28065,28241,29930,30104,31940,
chr1	24882660	24932096	gencode::NCMAP::ENSG00000184454.6	0	+	24882660	24932096	0	6	2,2,2,2,2,2,	0,39252,39343,44768,44855,49434,
chr1	24969838	24998672	gencode::SRRM1::ENSG00000133226.12	0	+	24969838	24998672	0	36	2,2,2,2,2,2,2,2,2,2,2,2,2,2,2,2,2,2,2,2,2,2,2,2,2,2,2,2,2,2,2,2,2,2,2,2,	0,2634,2726,3317,3442,5509,5682,6621,6739,8059,8265,9084,9281,9563,9685,10956,10996,11505,11782,17369,17452,17960,18049,19310,19457,19833,19877,23465,23578,25773,26240,26770,26968,28036,28248,28832,
chr1	25072116	25167263	gencode::CLIC4::ENSG00000169504.10	0	+	25072116	25167263	0	10	2,2,2,2,2,2,2,2,2,2,	0,52114,52226,68466,68594,81382,81491,94232,94416,95145,
chr1	25229157	25291326	gencode::RUNX3::ENSG00000020633.14	0	-	25229157	25291326	0	12	2,2,2,2,2,2,2,2,2,2,2,2,	0,4590,4751,16571,16678,24905,25064,26371,26918,61845,62002,62167,
chr1	25549922	25558934	gencode::SYF2::ENSG00000117614.5	0	-	25549922	25558934	0	12	2,2,2,2,2,2,2,2,2,2,2,2,	0,1568,1669,4008,4101,4684,4804,5564,5692,8670,8780,9010,
chr1	25569196	25573799	gencode::C1orf63::ENSG00000117616.13	0	-	25569196	25573799	0	11	2,2,2,2,2,2,2,2,2,2,2,	0,842,928,1716,1771,1793,2442,2596,3736,4324,4601,
chr1	25599186	25655388	gencode::RHD::ENSG00000187010.14	0	+	25599186	25655388	0	20	2,2,2,2,2,2,2,2,2,2,2,2,2,2,2,2,2,2,2,2,	0,11875,12064,17943,18096,28248,28398,28822,28991,30624,30764,33898,34034,34949,35121,44302,44384,49191,49267,56200,
chr1	25664947	25687150	gencode::TMEM50A::ENSG00000183726.6	0	+	25664947	25687150	0	12	2,2,2,2,2,2,2,2,2,2,2,2,	0,2015,2123,4502,4617,13167,13237,14423,14518,18334,18397,22201,
chr1	25689044	25756430	gencode::RHCE::ENSG00000188672.12	0	-	25689044	25756430	0	23	2,2,2,2,2,2,2,2,2,2,2,2,2,2,2,2,2,2,2,2,2,2,2,	0,7911,7987,12793,12875,23155,23291,26420,26560,28193,28362,29438,29588,40040,40193,46127,46316,48784,48925,58083,66397,66496,67384,
chr1	25757669	25824754	gencode::TMEM57::ENSG00000204178.5	0	+	25757669	25824754	0	20	2,2,2,2,2,2,2,2,2,2,2,2,2,2,2,2,2,2,2,2,	0,15581,15725,17627,17756,23078,23204,25472,25653,27210,27714,52935,53096,54432,54617,57992,58115,60229,60406,67083,
chr1	25870277	25893338	gencode::LDLRAP1::ENSG00000157978.7	0	+	25870277	25893338	0	16	2,2,2,2,2,2,2,2,2,2,2,2,2,2,2,2,	0,10133,10278,11071,11186,13364,13481,18855,18930,19281,19367,19872,20005,21384,21421,23059,
chr1	25944828	26110153	gencode::MAN1C1::ENSG00000117643.10	0	+	25944828	26110153	0	25	2,2,2,2,2,2,2,2,2,2,2,2,2,2,2,2,2,2,2,2,2,2,2,2,2,	0,35902,36029,68100,68199,91808,128328,128446,130915,130998,135144,135241,140252,140372,145534,145630,153317,153435,159765,159987,162600,162775,164245,164363,165323,
chr1	26126904	26142038	gencode::SEPN1::ENSG00000162430.12	0	+	26126904	26142038	0	26	2,2,2,2,2,2,2,2,2,2,2,2,2,2,2,2,2,2,2,2,2,2,2,2,2,2,	0,627,747,1600,1704,4726,4862,8164,8376,8610,8737,9267,9407,11038,11122,11275,11466,12271,12379,13215,13228,13465,13580,13661,13765,15132,
chr1	26146520	26158411	gencode::MTFR1L::ENSG00000117640.13	0	+	26146520	26158411	0	14	2,2,2,2,2,2,2,2,2,2,2,2,2,2,	0,974,2987,3099,3589,3612,3719,6270,6382,6583,6797,9477,9801,11889,
chr1	26158649	26185770	gencode::AUNIP::ENSG00000127423.6	0	-	26158649	26185770	0	5	2,2,2,2,2,	0,3688,5252,5396,27119,
chr1	26190352	26197099	gencode::PAQR7::ENSG00000182749.5	0	-	26190352	26197099	0	2	2,2,	0,6745,
chr1	26212360	26233278	gencode::STMN1::ENSG00000117632.16	0	-	26212360	26233278	0	12	2,2,2,2,2,2,2,2,2,2,2,2,	0,15218,15619,15813,17769,17944,18792,18869,19177,19980,20517,20916,
chr1	26288574	26324515	gencode::PAFAH2::ENSG00000158006.9	0	-	26288574	26324515	0	21	2,2,2,2,2,2,2,2,2,2,2,2,2,2,2,2,2,2,2,2,2,	0,10472,10629,12394,12567,14596,14690,20278,20394,21860,22004,22374,22445,26145,26244,27362,27518,28641,28780,28838,35939,
chr1	26349916	26361655	gencode::EXTL1::ENSG00000158008.5	0	+	26349916	26361655	0	20	2,2,2,2,2,2,2,2,2,2,2,2,2,2,2,2,2,2,2,2,	0,5765,5861,6172,6282,7048,7170,7704,7839,8032,8141,8968,9060,9801,9890,10268,10431,11408,11579,11737,
chr1	26365796	26372337	gencode::SLC30A2::ENSG00000158014.10	0	-	26365796	26372337	0	14	2,2,2,2,2,2,2,2,2,2,2,2,2,2,	0,469,606,2392,2500,3241,3403,4090,4246,4990,5139,5689,5912,6539,
chr1	26378374	26393826	gencode::TRIM63::ENSG00000158022.6	0	-	26378374	26393826	0	16	2,2,2,2,2,2,2,2,2,2,2,2,2,2,2,2,	0,2007,2081,5317,5444,5742,5767,6504,6740,8380,8478,9280,9451,14382,14557,15450,
chr1	26438406	26448327	gencode::PDIK1L::ENSG00000175087.5	0	+	26438406	26448327	0	6	2,2,2,2,2,2,	0,542,735,2374,2678,9919,
chr1	26485617	26487702	gencode::FAM110D::ENSG00000197245.4	0	+	26485617	26487702	0	2	2,2,	0,2083,
chr1	26496674	26496908	gencode::ZNF593::ENSG00000142684.7	0	+	26496674	26496908	0	2	2,2,	0,232,
chr1	26504090	26515769	gencode::CNKSR1::ENSG00000142675.13	0	+	26504090	26515769	0	40	2,2,2,2,2,2,2,2,2,2,2,2,2,2,2,2,2,2,2,2,2,2,2,2,2,2,2,2,2,2,2,2,2,2,2,2,2,2,2,2,	0,2851,3011,3113,3297,4255,4342,4759,4803,4878,4985,5595,5657,5744,5836,6127,6231,6469,6542,6612,6688,6799,6908,6983,7013,7412,7587,9566,9642,9809,9883,10632,10708,10840,10904,10996,11098,11170,11354,11677,
chr1	26517331	26528979	gencode::CATSPER4::ENSG00000188782.3	0	+	26517331	26528979	0	18	2,2,2,2,2,2,2,2,2,2,2,2,2,2,2,2,2,2,	0,444,590,2944,3048,6843,6943,7114,7237,7443,7579,9041,9218,9987,10201,10511,10679,11646,
chr1	26560801	26603623	gencode::CEP85::ENSG00000130695.9	0	+	26560801	26603623	0	26	2,2,2,2,2,2,2,2,2,2,2,2,2,2,2,2,2,2,2,2,2,2,2,2,2,2,	0,5449,5528,9853,10008,20858,21555,23284,23420,23830,23950,25304,25492,34170,34325,35147,35304,36701,36797,37708,37761,40651,40761,42222,42450,42820,
chr1	26606694	26607548	gencode::SH3BGRL3::ENSG00000142669.9	0	+	26606694	26607548	0	3	2,2,2,	0,559,852,
chr1	26609060	26633197	gencode::UBXN11::ENSG00000158062.16	0	-	26609060	26633197	0	30	2,2,2,2,2,2,2,2,2,2,2,2,2,2,2,2,2,2,2,2,2,2,2,2,2,2,2,2,2,2,	0,77,220,292,368,1570,1676,1790,1913,2972,3251,3468,11633,11762,14347,14426,14855,14912,15390,15493,18354,18455,19122,19153,20241,20349,20471,20598,24020,24135,
chr1	26644562	26646661	gencode::CD52::ENSG00000169442.4	0	+	26644562	26646661	0	2	2,2,	0,2097,
chr1	26648547	26670235	gencode::AIM1L::ENSG00000176092.9	0	-	26648547	26670235	0	36	2,2,2,2,2,2,2,2,2,2,2,2,2,2,2,2,2,2,2,2,2,2,2,2,2,2,2,2,2,2,2,2,2,2,2,2,	0,105,267,2093,2254,6150,6276,6675,6817,9430,9562,14036,14151,14279,14314,14547,14676,14782,14924,15194,15323,15479,15618,15953,15991,16292,16421,17231,17373,20695,20827,20988,21103,21187,21237,21686,
chr1	26688513	26699159	gencode::ZNF683::ENSG00000176083.13	0	-	26688513	26699159	0	13	2,2,2,2,2,2,2,2,2,2,2,2,2,	0,91,153,1001,1132,2507,3204,5568,5775,6433,6560,6563,10644,
chr1	26737413	26755586	gencode::LIN28A::ENSG00000131914.6	0	+	26737413	26755586	0	8	2,2,2,2,2,2,2,2,	0,461,660,14378,14565,15317,17665,18171,
chr1	26758867	26795382	gencode::DHDDS::ENSG00000117682.12	0	+	26758867	26795382	0	16	2,2,2,2,2,2,2,2,2,2,2,2,2,2,2,2,	0,512,632,5789,5908,10352,10497,13937,14056,15180,15977,25412,25529,27658,27768,36513,
chr1	26799118	26801603	gencode::HMGN2::ENSG00000198830.6	0	+	26799118	26801603	0	10	2,2,2,2,2,2,2,2,2,2,	0,853,900,1073,1105,1455,1508,1942,2040,2483,
chr1	26856474	26900569	gencode::RPS6KA1::ENSG00000117676.9	0	+	26856474	26900569	0	45	2,2,2,2,2,2,2,2,2,2,2,2,2,2,2,2,2,2,2,2,2,2,2,2,2,2,2,2,2,2,2,2,2,2,2,2,2,2,2,2,2,2,2,2,2,	0,1455,6939,6986,13238,16052,16881,17000,17203,17287,21411,21494,21658,21740,23405,23514,24228,24268,24610,24755,25165,25238,25551,25642,26668,26735,27012,27117,28821,28954,30740,30868,31059,31151,31519,31680,41463,41627,41863,41942,42190,42310,43238,43378,44093,
chr1	27024031	27105513	gencode::ARID1A::ENSG00000117713.13	0	+	27024031	27105513	0	38	2,2,2,2,2,2,2,2,2,2,2,2,2,2,2,2,2,2,2,2,2,2,2,2,2,2,2,2,2,2,2,2,2,2,2,2,2,2,	0,32108,32323,33609,34064,35133,35252,63313,63556,63841,63933,64609,64779,65430,65745,68678,68826,68914,69026,70247,70459,73576,73786,74957,75092,75269,75447,75803,75956,76037,76177,76259,76358,76786,77680,78034,78167,81480,
chr1	27114759	27124053	gencode::PIGV::ENSG00000060642.6	0	+	27114759	27124053	0	8	2,2,2,2,2,2,2,2,	0,126,551,2488,2625,5842,6966,9292,
chr1	27153630	27180216	gencode::ZDHHC18::ENSG00000204160.7	0	+	27153630	27180216	0	14	2,2,2,2,2,2,2,2,2,2,2,2,2,2,	0,5305,5468,21466,21618,23159,23299,23416,23467,23987,24092,25611,25726,26584,
chr1	27206240	27216176	gencode::GPN2::ENSG00000142751.10	0	-	27206240	27216176	0	9	2,2,2,2,2,2,2,2,2,	0,4408,4541,6221,6384,6725,9217,9376,9934,
chr1	27217717	27226482	gencode::GPATCH3::ENSG00000198746.8	0	-	27217717	27226482	0	12	2,2,2,2,2,2,2,2,2,2,2,2,	0,1182,1312,1441,1565,2160,2222,3007,3184,6072,6499,8763,
chr1	27238577	27239899	gencode::NR0B2::ENSG00000131910.4	0	-	27238577	27239899	0	2	2,2,	0,1320,
chr1	27248420	27272620	gencode::NUDC::ENSG00000090273.9	0	+	27248420	27272620	0	16	2,2,2,2,2,2,2,2,2,2,2,2,2,2,2,2,	0,2157,2237,19525,19731,19821,19889,20728,20847,20939,21136,23458,23544,23636,23757,24198,
chr1	27276642	27286840	gencode::C1orf172::ENSG00000175707.7	0	-	27276642	27286840	0	6	2,2,2,2,2,2,	0,528,605,1188,2261,10196,
chr1	27321103	27326337	gencode::TRNP1::ENSG00000253368.3	0	+	27321103	27326337	0	2	2,2,	0,5232,
chr1	27333448	27338897	gencode::FAM46B::ENSG00000158246.7	0	-	27333448	27338897	0	2	2,2,	0,5447,
chr1	27427135	27480473	gencode::SLC9A1::ENSG00000090020.6	0	-	27427135	27480473	0	21	2,2,2,2,2,2,2,2,2,2,2,2,2,2,2,2,2,2,2,2,2,	0,556,631,1078,1182,1369,1486,1738,1914,2026,2099,2576,2668,5443,7001,7221,8880,9133,13179,13642,53336,
chr1	27561442	27632676	gencode::WDTC1::ENSG00000142784.11	0	+	27561442	27632676	0	30	2,2,2,2,2,2,2,2,2,2,2,2,2,2,2,2,2,2,2,2,2,2,2,2,2,2,2,2,2,2,	0,26002,26151,28198,28284,47285,47334,48384,48498,52720,52910,57261,57446,59068,59165,59560,59678,61372,61450,62094,62205,62984,63160,66272,66510,68667,68844,70047,70242,71232,
chr1	27648882	27661869	gencode::TMEM222::ENSG00000186501.10	0	+	27648882	27661869	0	10	2,2,2,2,2,2,2,2,2,2,	0,8326,8413,9676,9710,11564,11663,11757,11890,12985,
chr1	27668641	27680203	gencode::SYTL1::ENSG00000142765.13	0	+	27668641	27680203	0	28	2,2,2,2,2,2,2,2,2,2,2,2,2,2,2,2,2,2,2,2,2,2,2,2,2,2,2,2,	0,3144,3375,5268,5419,5655,5730,5814,5862,6927,7002,7245,7348,7499,7615,7819,7982,8236,8335,8641,8802,9105,9186,9303,9405,11130,11338,11560,
chr1	27681960	27693229	gencode::MAP3K6::ENSG00000142733.10	0	-	27681960	27693229	0	58	2,2,2,2,2,2,2,2,2,2,2,2,2,2,2,2,2,2,2,2,2,2,2,2,2,2,2,2,2,2,2,2,2,2,2,2,2,2,2,2,2,2,2,2,2,2,2,2,2,2,2,2,2,2,2,2,2,2,	0,197,276,554,630,916,1031,1118,1280,1537,1645,1928,2107,2239,2407,2709,2850,2947,3142,3237,3397,3945,4053,4386,4525,4769,4899,5233,5369,5449,5539,5685,5783,5874,5926,6048,6158,6233,6398,6619,6781,7169,7284,7379,7552,7970,8079,8445,8616,8732,8925,9189,9215,9301,9443,10786,11214,11267,
chr1	27695968	27701218	gencode::FCN3::ENSG00000142748.8	0	-	27695968	27701218	0	14	2,2,2,2,2,2,2,2,2,2,2,2,2,2,	0,1116,1253,1363,1495,3656,3786,4008,4043,4485,4532,4876,4974,5248,
chr1	27705999	27709641	gencode::CD164L2::ENSG00000174950.6	0	-	27705999	27709641	0	8	2,2,2,2,2,2,2,2,	0,686,2268,2315,2890,2988,3158,3640,
chr1	27719241	27720297	gencode::GPR3::ENSG00000181773.6	0	+	27719241	27720297	0	2	2,2,	0,1054,
chr1	27734840	27816496	gencode::WASF2::ENSG00000158195.6	0	-	27734840	27816496	0	16	2,2,2,2,2,2,2,2,2,2,2,2,2,2,2,2,	0,1343,1860,4223,4381,6484,6617,7636,7756,9927,10083,10612,10749,20428,20603,81654,
chr1	27861427	27929907	gencode::AHDC1::ENSG00000126705.9	0	-	27861427	27929907	0	13	2,2,2,2,2,2,2,2,2,2,2,2,2,	0,12342,17273,17973,18013,18155,18269,18374,23386,23614,23787,23967,68478,
chr1	27939633	27961575	gencode::FGR::ENSG00000000938.8	0	-	27939633	27961575	0	25	2,2,2,2,2,2,2,2,2,2,2,2,2,2,2,2,2,2,2,2,2,2,2,2,2,	0,94,228,1305,1461,1725,1804,2309,2491,2564,2722,3732,3884,4068,4174,8434,8535,9917,10022,10566,10807,11964,12029,12921,21940,
chr1	27992986	27998633	gencode::IFI6::ENSG00000126709.10	0	-	27992986	27998633	0	8	2,2,2,2,2,2,2,2,	0,1748,1900,1980,2060,2743,2871,5645,
chr1	28052672	28087005	gencode::FAM76A::ENSG00000009780.11	0	+	28052672	28087005	0	17	2,2,2,2,2,2,2,2,2,2,2,2,2,2,2,2,2,	0,1308,1375,4068,4172,6439,6496,7867,8022,18490,18650,22904,22993,29031,29169,33362,34331,
chr1	28099936	28148741	gencode::STX12::ENSG00000117758.9	0	+	28099936	28148741	0	16	2,2,2,2,2,2,2,2,2,2,2,2,2,2,2,2,	0,16134,16206,20105,20207,28250,28390,36818,36864,38735,38843,44423,44498,46222,46307,48803,
chr1	28157402	28176603	gencode::PPP1R8::ENSG00000117751.13	0	+	28157402	28176603	0	14	2,2,2,2,2,2,2,2,2,2,2,2,2,2,	0,355,475,1862,1925,7805,7961,10120,10343,12292,12439,16134,16201,19199,
chr1	28199176	28212377	gencode::THEMIS2::ENSG00000130775.11	0	+	28199176	28212377	0	10	2,2,2,2,2,2,2,2,2,2,	0,3920,4063,6976,7389,9303,10378,12627,12786,13199,
chr1	28218758	28241137	gencode::RPA2::ENSG00000117748.5	0	-	28218758	28241137	0	15	2,2,2,2,2,2,2,2,2,2,2,2,2,2,2,	0,1762,1859,2040,2150,4755,4874,5383,5460,14678,14794,14931,15035,21813,22377,
chr1	28261755	28284986	gencode::SMPDL3B::ENSG00000130768.10	0	+	28261755	28284986	0	13	2,2,2,2,2,2,2,2,2,2,2,2,2,	0,9985,10201,13818,13918,17968,18114,19107,19282,20437,20620,20702,23229,
chr1	28286873	28293013	gencode::XKR8::ENSG00000158156.7	0	+	28286873	28293013	0	4	2,2,2,2,	0,3132,3331,6138,
chr1	28301057	28415034	gencode::EYA3::ENSG00000158161.11	0	-	28301057	28415034	0	35	2,2,2,2,2,2,2,2,2,2,2,2,2,2,2,2,2,2,2,2,2,2,2,2,2,2,2,2,2,2,2,2,2,2,2,	0,2843,3825,3928,13986,14110,15148,15265,18851,19014,22771,22832,25411,25503,29787,29873,36398,36540,38562,38748,42605,42693,53240,53380,60995,61134,64290,64359,68022,68104,73834,73880,83445,83548,113975,
chr1	28477570	28520232	gencode::PTAFR::ENSG00000169403.7	0	-	28477570	28520232	0	4	2,2,2,2,	0,25530,25614,42660,
chr1	28527030	28527104	gencode::AL353354.1::ENSG00000215902.1	0	-	28527030	28527104	0	2	2,2,	0,72,
chr1	28527881	28559431	gencode::DNAJC8::ENSG00000126698.6	0	-	28527881	28559431	0	16	2,2,2,2,2,2,2,2,2,2,2,2,2,2,2,2,	0,2374,2452,3885,3979,6969,7043,8599,8696,9198,9267,13567,13626,27549,27653,31548,
chr1	28562781	28573099	gencode::ATPIF1::ENSG00000130770.13	0	+	28562781	28573099	0	5	2,2,2,2,2,	0,88,1488,1564,10316,
chr1	28586448	28607226	gencode::SESN2::ENSG00000130766.4	0	+	28586448	28607226	0	18	2,2,2,2,2,2,2,2,2,2,2,2,2,2,2,2,2,2,	0,9243,9311,11734,11934,12344,12529,12641,12856,13418,13571,14100,14221,14885,15078,19157,19304,20776,
chr1	28655691	28662304	gencode::MED18::ENSG00000130772.9	0	+	28655691	28662304	0	6	2,2,2,2,2,2,	0,1414,1555,5234,5906,6611,
chr1	28696336	28823045	gencode::PHACTR4::ENSG00000204138.8	0	+	28696336	28823045	0	27	2,2,2,2,2,2,2,2,2,2,2,2,2,2,2,2,2,2,2,2,2,2,2,2,2,2,2,	0,37582,37638,68605,89257,89433,90384,90467,95857,96024,96554,96943,103727,104327,106280,106467,110624,110780,119343,119401,121124,121188,121823,121963,123188,123267,126707,
chr1	28832596	28864343	gencode::RCC1::ENSG00000180198.11	0	+	28832596	28864343	0	28	2,2,2,2,2,2,2,2,2,2,2,2,2,2,2,2,2,2,2,2,2,2,2,2,2,2,2,2,	0,2041,2076,2743,2817,2821,10638,10783,12224,23771,23855,24436,24531,25716,25906,26084,26266,28963,29062,29171,29296,29784,29942,30175,30297,30660,30815,31745,
chr1	28879649	28904011	gencode::TRNAU1AP::ENSG00000180098.5	0	+	28879649	28904011	0	16	2,2,2,2,2,2,2,2,2,2,2,2,2,2,2,2,	0,500,600,7493,7595,8206,8261,11563,11697,14154,14276,18036,18201,18727,18763,24360,
chr1	28918911	28920205	gencode::RAB42::ENSG00000188060.6	0	+	28918911	28920205	0	2	2,2,	0,1292,
chr1	28930086	28969503	gencode::TAF12::ENSG00000120656.7	0	-	28930086	28969503	0	11	2,2,2,2,2,2,2,2,2,2,2,	0,1795,1886,9670,9787,14376,14456,18337,18591,39078,39415,
chr1	28995351	29040584	gencode::GMEB1::ENSG00000162419.8	0	+	28995351	29040584	0	19	2,2,2,2,2,2,2,2,2,2,2,2,2,2,2,2,2,2,2,	0,14741,14744,14901,21232,21347,22743,22870,24100,24206,28085,28245,33596,33730,35350,35490,41678,41803,45231,
chr1	29063321	29095440	gencode::YTHDF2::ENSG00000198492.10	0	+	29063321	29095440	0	10	2,2,2,2,2,2,2,2,2,2,	0,235,338,846,873,1447,1529,5591,7177,32117,
chr1	29139122	29189253	gencode::OPRD1::ENSG00000116329.6	0	+	29139122	29189253	0	4	2,2,2,2,	0,46341,46693,50129,
chr1	29213722	29443330	gencode::EPB41::ENSG00000159023.14	0	+	29213722	29443330	0	43	2,2,2,2,2,2,2,2,2,2,2,2,2,2,2,2,2,2,2,2,2,2,2,2,2,2,2,2,2,2,2,2,2,2,2,2,2,2,2,2,2,2,2,	0,6627,27558,100218,100695,102143,102225,106117,106332,110002,110109,124652,124697,128479,128557,131011,131232,143187,143277,145880,146035,148613,148713,152041,152216,165891,166102,171376,171435,171598,171642,173209,173274,177769,210594,210725,222123,222227,225155,225238,228486,228593,229606,
chr1	29448360	29450367	gencode::TMEM200B::ENSG00000253304.1	0	-	29448360	29450367	0	3	2,2,2,	0,513,2005,
chr1	29475738	29508157	gencode::SRSF4::ENSG00000116350.11	0	-	29475738	29508157	0	10	2,2,2,2,2,2,2,2,2,2,	0,874,966,5467,5684,10145,10260,11146,11291,32417,
chr1	29520691	29557242	gencode::MECR::ENSG00000116353.11	0	-	29520691	29557242	0	19	2,2,2,2,2,2,2,2,2,2,2,2,2,2,2,2,2,2,2,	0,1759,1834,2016,2079,6334,6410,7761,7866,8949,9054,12580,12726,21823,21957,22406,22506,22633,36549,
chr1	29563229	29652110	gencode::PTPRU::ENSG00000060656.15	0	+	29563229	29652110	0	64	2,2,2,2,2,2,2,2,2,2,2,2,2,2,2,2,2,2,2,2,2,2,2,2,2,2,2,2,2,2,2,2,2,2,2,2,2,2,2,2,2,2,2,2,2,2,2,2,2,2,2,2,2,2,2,2,2,2,2,2,2,2,2,2,	0,18555,18689,21785,22059,22541,22625,22729,22847,23150,23327,23890,24186,38728,39039,42292,42404,42736,42940,43319,43424,45956,46232,47220,47259,48011,48152,52963,52995,55149,55309,67135,67328,68054,68132,68632,68711,68856,68876,70409,70429,74024,74063,74736,74836,74923,75042,75832,75989,78652,78790,79282,79434,81028,81204,83965,84108,86651,86779,86911,87071,88471,88609,88879,
chr1	31186478	31196304	gencode::MATN1::ENSG00000162510.5	0	-	31186478	31196304	0	14	2,2,2,2,2,2,2,2,2,2,2,2,2,2,	0,613,696,1523,1678,2275,2694,3156,3284,5101,5326,7771,8120,9824,
chr1	31206764	31230505	gencode::LAPTM5::ENSG00000162511.7	0	-	31206764	31230505	0	14	2,2,2,2,2,2,2,2,2,2,2,2,2,2,	0,1253,1348,3684,3782,5020,5145,5889,6020,7720,7799,8536,8632,23739,
chr1	31346224	31381295	gencode::SDC3::ENSG00000162512.11	0	-	31346224	31381295	0	7	2,2,2,2,2,2,2,	0,917,1211,3172,5243,5363,35069,
chr1	31406189	31538535	gencode::PUM1::ENSG00000134644.11	0	-	31406189	31538535	0	43	2,2,2,2,2,2,2,2,2,2,2,2,2,2,2,2,2,2,2,2,2,2,2,2,2,2,2,2,2,2,2,2,2,2,2,2,2,2,2,2,2,2,2,	0,3298,3493,7806,7930,8653,8781,12001,12141,16782,16919,18889,19021,20369,20639,31329,31568,32637,32936,33822,33968,35009,35150,41306,41460,46717,46824,47967,48063,59045,59318,61709,61878,72508,72689,73649,73760,95451,95522,125859,126235,132271,132344,
chr1	31654559	31712340	gencode::NKAIN1::ENSG00000084628.5	0	-	31654559	31712340	0	12	2,2,2,2,2,2,2,2,2,2,2,2,	0,145,229,815,878,2102,2302,3532,3615,6335,6475,57779,
chr1	31732968	31769457	gencode::SNRNP40::ENSG00000060688.8	0	-	31732968	31769457	0	19	2,2,2,2,2,2,2,2,2,2,2,2,2,2,2,2,2,2,2,	0,831,1055,1405,1511,7747,7811,9034,11255,11378,21250,21375,29130,29298,31789,31885,33095,33227,36487,
chr1	31769922	31836878	gencode::ZCCHC17::ENSG00000121766.10	0	+	31769922	31836878	0	17	2,2,2,2,2,2,2,2,2,2,2,2,2,2,2,2,2,	0,138,12966,13089,21089,21161,22031,22091,40097,40200,41879,41973,49562,49743,51751,51899,66954,
chr1	31838786	31845788	gencode::FABP3::ENSG00000121769.3	0	-	31838786	31845788	0	6	2,2,2,2,2,2,	0,1451,1555,3443,3618,7000,
chr1	31882699	31906910	gencode::SERINC2::ENSG00000168528.7	0	+	31882699	31906910	0	20	2,2,2,2,2,2,2,2,2,2,2,2,2,2,2,2,2,2,2,2,	0,530,583,3452,4212,13838,14002,14828,15021,15475,15557,15921,16061,16799,16971,19123,19216,23112,23333,24209,
chr1	32042196	32052439	gencode::TINAGL1::ENSG00000142910.11	0	+	32042196	32052439	0	23	2,2,2,2,2,2,2,2,2,2,2,2,2,2,2,2,2,2,2,2,2,2,2,	0,536,863,2606,2672,3690,6551,6646,6863,6980,8080,8206,8288,8441,8553,8745,8842,8890,9155,9281,10112,10160,10241,
chr1	32083482	32098036	gencode::HCRTR1::ENSG00000121764.7	0	+	32083482	32098036	0	17	2,2,2,2,2,2,2,2,2,2,2,2,2,2,2,2,2,	0,872,935,1167,1510,1648,1829,2959,3205,3593,3711,5639,5868,7113,7237,8906,14552,
chr1	32096443	32110441	gencode::PEF1::ENSG00000162517.8	0	-	32096443	32110441	0	8	2,2,2,2,2,2,2,2,	0,1796,2314,2472,4101,4377,4680,13996,
chr1	32118454	32169437	gencode::COL16A1::ENSG00000084636.13	0	-	32118454	32169437	0	147	2,2,2,2,2,2,2,2,2,2,2,2,2,2,2,2,2,2,2,2,2,2,2,2,2,2,2,2,2,2,2,2,2,2,2,2,2,2,2,2,2,2,2,2,2,2,2,2,2,2,2,2,2,2,2,2,2,2,2,2,2,2,2,2,2,2,2,2,2,2,2,2,2,2,2,2,2,2,2,2,2,2,2,2,2,2,2,2,2,2,2,2,2,2,2,2,2,2,2,2,2,2,2,2,2,2,2,2,2,2,2,2,2,2,2,2,2,2,2,2,2,2,2,2,2,2,2,2,2,2,2,2,2,2,2,2,2,2,2,2,2,2,2,2,2,2,2,	0,743,823,1011,1190,1936,2005,2458,2649,3544,3591,4177,4215,5632,5724,6058,6111,7729,7785,8210,8266,8558,8605,8804,8851,9478,9534,9731,9805,12316,12381,12727,12765,13026,13082,13181,13228,14719,14775,15309,15365,15946,16002,17746,17793,18759,18806,19560,19649,19740,19784,19868,19987,20045,20083,22151,22186,22402,22458,26832,26948,26998,27186,27248,28049,28078,28167,28214,30078,30149,30338,30394,3…
chr1	32193206	32229484	gencode::BAI2::ENSG00000121753.8	0	-	32193206	32229484	0	65	2,2,2,2,2,2,2,2,2,2,2,2,2,2,2,2,2,2,2,2,2,2,2,2,2,2,2,2,2,2,2,2,2,2,2,2,2,2,2,2,2,2,2,2,2,2,2,2,2,2,2,2,2,2,2,2,2,2,2,2,2,2,2,2,2,	0,417,476,574,675,990,1028,3192,3814,4507,4549,4909,5007,5364,5538,7575,7676,7972,8060,8219,8288,8713,8785,8965,9118,9821,9926,10044,10150,10592,10721,10979,11025,11224,11332,11700,12030,12318,12429,12502,12573,12739,12936,13765,13874,14016,14120,14192,14362,14445,14612,15230,15397,16585,16752,17040,17126,28391,29210,29593,29676,29774,29906,31713,36276,
chr1	32256892	32281561	gencode::SPOCD1::ENSG00000134668.8	0	-	32256892	32281561	0	30	2,2,2,2,2,2,2,2,2,2,2,2,2,2,2,2,2,2,2,2,2,2,2,2,2,2,2,2,2,2,	0,921,1110,1384,1476,1984,2137,2453,2606,2830,2944,5296,5424,6913,7032,7148,7310,8107,8194,8515,8572,8722,8850,9147,9326,10370,10414,22657,24081,24667,
chr1	32374561	32403587	gencode::PTP4A2::ENSG00000184007.13	0	-	32374561	32403587	0	10	2,2,2,2,2,2,2,2,2,2,	0,1075,1152,2733,2866,6932,7027,10007,10698,29024,
chr1	32479978	32508127	gencode::KHDRBS1::ENSG00000121774.13	0	+	32479978	32508127	0	16	2,2,2,2,2,2,2,2,2,2,2,2,2,2,2,2,	0,15918,16045,17144,17263,18808,18957,22530,22666,23455,23659,24172,24242,25135,25196,28147,
chr1	32538652	32568031	gencode::TMEM39B::ENSG00000121775.13	0	+	32538652	32568031	0	18	2,2,2,2,2,2,2,2,2,2,2,2,2,2,2,2,2,2,	0,1897,2026,2549,2771,3510,3595,3709,3795,4110,4267,18618,18621,18960,21730,21920,27388,29377,
chr1	32573735	32636307	gencode::KPNA6::ENSG00000025800.9	0	+	32573735	32636307	0	28	2,2,2,2,2,2,2,2,2,2,2,2,2,2,2,2,2,2,2,2,2,2,2,2,2,2,2,2,	0,360,34890,46451,46587,48716,48811,49209,49311,50130,50227,51263,51397,52478,52569,53810,53912,54224,54390,55098,55179,57968,58096,59032,59162,61745,61926,62570,
chr1	32645377	32660502	gencode::TXLNA::ENSG00000084652.11	0	+	32645377	32660502	0	20	2,2,2,2,2,2,2,2,2,2,2,2,2,2,2,2,2,2,2,2,	0,535,738,1463,1801,4746,4840,8175,8348,10276,10473,12532,12654,12878,12955,13429,13524,14286,14384,15123,
chr1	32666310	32670794	gencode::CCDC28B::ENSG00000160050.10	0	+	32666310	32670794	0	9	2,2,2,2,2,2,2,2,2,	0,1201,1390,3167,3336,3474,3670,3886,4482,
chr1	32671564	32672840	gencode::IQCC::ENSG00000160051.7	0	+	32671564	32672840	0	8	2,2,2,2,2,2,2,2,	0,188,334,543,798,1036,1157,1274,
chr1	32674960	32681402	gencode::DCDC2B::ENSG00000222046.2	0	+	32674960	32681402	0	16	2,2,2,2,2,2,2,2,2,2,2,2,2,2,2,2,	0,1910,1964,2399,2478,2708,2842,3128,3277,3392,3434,5435,5573,6078,6184,6440,
chr1	32681882	32687907	gencode::TMEM234::ENSG00000160055.15	0	-	32681882	32687907	0	10	2,2,2,2,2,2,2,2,2,2,	0,100,236,666,1070,4847,4916,5583,5737,6023,
chr1	32688045	32696715	gencode::EIF3I::ENSG00000084623.7	0	+	32688045	32696715	0	20	2,2,2,2,2,2,2,2,2,2,2,2,2,2,2,2,2,2,2,2,	0,91,186,1587,1677,1963,2031,3724,3876,3956,4086,6052,6165,6280,6372,6688,6764,8480,8575,8668,
chr1	32713283	32713971	gencode::FAM167B::ENSG00000183615.5	0	+	32713283	32713971	0	2	2,2,	0,686,
chr1	32716972	32751114	gencode::LCK::ENSG00000182866.12	0	+	32716972	32751114	0	23	2,2,2,2,2,2,2,2,2,2,2,2,2,2,2,2,2,2,2,2,2,2,2,	0,22855,22951,23063,23363,23712,23947,24048,24195,24301,24540,24692,24963,25118,25233,25415,28207,28376,28467,28623,28705,28839,34140,
chr1	32757819	32798617	gencode::HDAC1::ENSG00000116478.7	0	+	32757819	32798617	0	27	2,2,2,2,2,2,2,2,2,2,2,2,2,2,2,2,2,2,2,2,2,2,2,2,2,2,2,	0,219,10400,10515,24444,24564,32258,32335,34718,34859,35315,35459,36847,36942,38357,38468,38547,38690,39253,39364,39455,39588,39869,40024,40480,40531,40796,
chr1	32800698	32801547	gencode::MARCKSL1::ENSG00000175130.6	0	-	32800698	32801547	0	2	2,2,	0,847,
chr1	32827136	32827558	gencode::FAM229A::ENSG00000225828.1	0	-	32827136	32827558	0	4	2,2,2,2,	0,192,341,420,
chr1	32828447	32829195	gencode::TSSK3::ENSG00000162526.6	0	+	32828447	32829195	0	2	2,2,	0,746,
chr1	32832255	32860004	gencode::BSDC1::ENSG00000160058.14	0	-	32832255	32860004	0	20	2,2,2,2,2,2,2,2,2,2,2,2,2,2,2,2,2,2,2,2,	0,1896,2684,9605,10087,11313,11394,11558,11629,12067,12185,14557,14614,17173,17394,20122,20241,27423,27486,27747,
chr1	32930706	32950701	gencode::ZBTB8B::ENSG00000273274.1	0	+	32930706	32950701	0	6	2,2,2,2,2,2,	0,5476,6510,15783,15964,19993,
chr1	33005173	33065687	gencode::ZBTB8A::ENSG00000160062.10	0	+	33005173	33065687	0	8	2,2,2,2,2,2,2,2,	0,13884,13968,53356,54182,55479,55651,60512,
chr1	33087549	33116033	gencode::ZBTB8OS::ENSG00000176261.11	0	-	33087549	33116033	0	12	2,2,2,2,2,2,2,2,2,2,2,2,	0,5557,5596,9876,9931,11694,11779,12000,12124,12817,12844,28482,
chr1	33116923	33146126	gencode::RBBP4::ENSG00000162521.14	0	+	33116923	33146126	0	24	2,2,2,2,2,2,2,2,2,2,2,2,2,2,2,2,2,2,2,2,2,2,2,2,	0,110,589,739,6102,6250,16900,17076,17414,17532,17647,17810,17906,18035,18161,18241,21125,21204,21317,21377,21466,21579,28315,29201,
chr1	33147461	33168208	gencode::SYNC::ENSG00000162520.10	0	-	33147461	33168208	0	8	2,2,2,2,2,2,2,2,	0,2147,2229,2395,2522,13002,14184,20745,
chr1	33207790	33238465	gencode::KIAA1522::ENSG00000162522.6	0	+	33207790	33238465	0	14	2,2,2,2,2,2,2,2,2,2,2,2,2,2,	0,11991,23638,25595,25768,25870,25928,26460,26586,27481,27597,27688,30252,30673,
chr1	33241692	33282788	gencode::YARS::ENSG00000134684.6	0	-	33241692	33282788	0	24	2,2,2,2,2,2,2,2,2,2,2,2,2,2,2,2,2,2,2,2,2,2,2,2,	0,3288,3432,3991,4187,4954,5054,6310,6448,10268,10356,10846,10984,15068,15163,21669,21752,30388,30520,34497,34675,34817,34966,41094,
chr1	33283200	33321524	gencode::S100PBP::ENSG00000116497.13	0	+	33283200	33321524	0	16	2,2,2,2,2,2,2,2,2,2,2,2,2,2,2,2,	0,90,7711,7830,8496,9331,10391,10482,12362,12468,16432,16462,17263,35477,35567,38322,
chr1	33329900	33337994	gencode::FNDC5::ENSG00000160097.11	0	-	33329900	33337994	0	10	2,2,2,2,2,2,2,2,2,2,	0,498,3451,3543,3888,4089,4580,4698,6351,8092,
chr1	33352116	33359365	gencode::HPCA::ENSG00000121905.5	0	+	33352116	33359365	0	6	2,2,2,2,2,2,	0,2360,2761,7006,7114,7247,
chr1	33360480	33366823	gencode::TMEM54::ENSG00000121900.14	0	-	33360480	33366823	0	10	2,2,2,2,2,2,2,2,2,2,	0,423,560,673,864,1028,1090,3244,3440,6341,
chr1	33402860	33429651	gencode::RNF19B::ENSG00000116514.12	0	-	33402860	33429651	0	17	2,2,2,2,2,2,2,2,2,2,2,2,2,2,2,2,2,	0,50,1135,1269,4990,5200,6757,6900,8252,8369,9140,9305,10960,11107,12307,12515,26789,
chr1	33476434	33502336	gencode::AK2::ENSG00000004455.12	0	-	33476434	33502336	0	14	2,2,2,2,2,2,2,2,2,2,2,2,2,2,	0,1238,1289,2569,3686,3761,9328,10531,10628,10757,10870,13606,13734,25900,
chr1	33546895	33585644	gencode::ADC::ENSG00000142920.12	0	+	33546895	33585644	0	24	2,2,2,2,2,2,2,2,2,2,2,2,2,2,2,2,2,2,2,2,2,2,2,2,	0,91,94,214,304,518,881,1060,2657,2833,10753,10928,11985,12122,13251,13419,15410,15575,16710,16885,20536,36605,36822,38747,
chr1	33613328	33646625	gencode::TRIM62::ENSG00000116525.9	0	-	33613328	33646625	0	9	2,2,2,2,2,2,2,2,2,	0,10523,10641,11958,12217,17741,17839,28678,33295,
chr1	33722255	33764530	gencode::ZNF362::ENSG00000160094.10	0	+	33722255	33764530	0	16	2,2,2,2,2,2,2,2,2,2,2,2,2,2,2,2,	0,13830,13958,19443,19509,19691,19940,23467,23803,24930,25157,38280,38361,38490,38651,42273,
chr1	33773054	33786676	gencode::A3GALT2::ENSG00000184389.8	0	-	33773054	33786676	0	7	2,2,2,2,2,2,2,	0,4596,5045,5137,5351,5437,13620,
chr1	33790620	33895781	gencode::PHC2::ENSG00000134686.12	0	-	33790620	33895781	0	30	2,2,2,2,2,2,2,2,2,2,2,2,2,2,2,2,2,2,2,2,2,2,2,2,2,2,2,2,2,2,	0,942,3848,4127,5049,5193,6326,6443,7253,7385,9068,9273,24575,29379,29547,29816,30234,42094,42409,43514,43603,45399,45566,45995,46075,47267,47428,50344,50574,105159,
chr1	33938288	33959817	gencode::ZSCAN20::ENSG00000121903.10	0	+	33938288	33959817	0	14	2,2,2,2,2,2,2,2,2,2,2,2,2,2,	0,4,6489,7018,15774,15963,16424,16503,16827,16914,18334,20496,20927,21527,
chr1	33982170	34630511	gencode::CSMD2::ENSG00000121904.13	0	-	33982170	34630511	0	145	2,2,2,2,2,2,2,2,2,2,2,2,2,2,2,2,2,2,2,2,2,2,2,2,2,2,2,2,2,2,2,2,2,2,2,2,2,2,2,2,2,2,2,2,2,2,2,2,2,2,2,2,2,2,2,2,2,2,2,2,2,2,2,2,2,2,2,2,2,2,2,2,2,2,2,2,2,2,2,2,2,2,2,2,2,2,2,2,2,2,2,2,2,2,2,2,2,2,2,2,2,2,2,2,2,2,2,2,2,2,2,2,2,2,2,2,2,2,2,2,2,2,2,2,2,2,2,2,2,2,2,2,2,2,2,2,2,2,2,2,2,2,2,2,2,	0,2892,3107,3239,3380,4890,4980,6734,6849,8309,8473,10623,10688,16477,16659,17223,17337,20449,20525,20863,21039,23952,24128,24557,24739,26147,26326,29464,29649,33604,33780,41161,41352,42727,42903,51020,51271,52801,52977,54959,55156,55933,56121,60723,60914,64180,64329,67069,67260,69931,70047,70515,70598,75919,83671,84292,84440,85796,85976,88709,88900,94468,94680,97931,98050,100333,100405,100926,10…
chr1	34326491	34328465	gencode::HMGB4::ENSG00000176256.6	0	+	34326491	34328465	0	6	2,2,2,2,2,2,	0,312,448,1580,1635,1972,
chr1	34632772	34684286	gencode::C1orf94::ENSG00000142698.10	0	+	34632772	34684286	0	13	2,2,2,2,2,2,2,2,2,2,2,2,2,	0,10938,30051,30742,33598,33861,34910,35088,40983,41063,45036,45235,51512,
chr1	35220796	35222907	gencode::GJB5::ENSG00000189280.3	0	+	35220796	35222907	0	2	2,2,	0,2109,
chr1	35225389	35226533	gencode::GJB4::ENSG00000189433.5	0	+	35225389	35226533	0	2	2,2,	0,1142,
chr1	35247379	35250338	gencode::GJB3::ENSG00000188910.7	0	+	35247379	35250338	0	3	2,2,2,	0,664,2957,
chr1	35258669	35259797	gencode::GJA4::ENSG00000187513.8	0	+	35258669	35259797	0	2	2,2,	0,1126,
chr1	35321583	35325277	gencode::SMIM12::ENSG00000163866.8	0	-	35321583	35325277	0	8	2,2,2,2,2,2,2,2,	0,571,757,1201,2855,3470,3667,3692,
chr1	35331902	35395051	gencode::DLGAP3::ENSG00000116544.7	0	-	35331902	35395051	0	22	2,2,2,2,2,2,2,2,2,2,2,2,2,2,2,2,2,2,2,2,2,2,	0,744,890,1232,1326,2301,2788,18674,18762,19174,19490,19768,19984,33365,33440,33764,33972,37973,39133,41051,41136,63147,
chr1	35447720	35450798	gencode::ZMYM6NB::ENSG00000243749.1	0	-	35447720	35450798	0	4	2,2,2,2,	0,1645,1828,3076,
chr1	35449548	35497415	gencode::ZMYM6::ENSG00000163867.12	0	-	35449548	35497415	0	33	2,2,2,2,2,2,2,2,2,2,2,2,2,2,2,2,2,2,2,2,2,2,2,2,2,2,2,2,2,2,2,2,2,	0,4988,8284,8440,20018,20058,21182,21325,23001,23151,24802,24977,26497,26650,26808,27089,27940,28058,28481,28634,30747,30941,31038,31215,35655,36433,36520,46597,46766,47317,47390,47681,47865,
chr1	35545043	35578577	gencode::ZMYM1::ENSG00000197056.5	0	+	35545043	35578577	0	20	2,2,2,2,2,2,2,2,2,2,2,2,2,2,2,2,2,2,2,2,	0,13949,13999,14469,14641,16374,16449,17872,18124,24850,25027,25112,25327,30849,31005,32327,32470,32642,32688,33532,
chr1	35650194	35657822	gencode::SFPQ::ENSG00000116560.6	0	-	35650194	35657822	0	18	2,2,2,2,2,2,2,2,2,2,2,2,2,2,2,2,2,2,	0,2405,2529,2607,2658,3377,3497,4407,4494,4590,4789,5902,6000,6098,6402,6745,6936,7626,
chr1	35734686	35885070	gencode::ZMYM4::ENSG00000146463.7	0	+	35734686	35885070	0	58	2,2,2,2,2,2,2,2,2,2,2,2,2,2,2,2,2,2,2,2,2,2,2,2,2,2,2,2,2,2,2,2,2,2,2,2,2,2,2,2,2,2,2,2,2,2,2,2,2,2,2,2,2,2,2,2,2,2,	0,56272,56320,89837,90361,92106,92170,92531,92704,100941,101028,101284,101542,112171,112348,112458,112673,116354,116507,116986,117104,117915,118193,118366,118519,119822,119997,120860,121013,123124,123267,123559,123599,124507,124654,127464,127585,128289,128460,129325,129381,129776,129958,130394,130491,135935,136109,136285,136383,138920,139074,144884,144998,146378,146629,149355,149487,150382,
chr1	35900682	36022807	gencode::KIAA0319L::ENSG00000142687.13	0	-	35900682	36022807	0	41	2,2,2,2,2,2,2,2,2,2,2,2,2,2,2,2,2,2,2,2,2,2,2,2,2,2,2,2,2,2,2,2,2,2,2,2,2,2,2,2,2,	0,5963,6057,7162,7255,7822,7947,9077,9222,13089,13251,14783,14924,15274,15428,16544,16695,18473,18608,19278,19404,19530,20929,21160,25221,25356,27537,27632,31524,31614,35779,35879,39721,39825,43882,44131,71528,72054,119266,119438,122123,
chr1	36023484	36030827	gencode::NCDN::ENSG00000020129.11	0	+	36023484	36030827	0	14	2,2,2,2,2,2,2,2,2,2,2,2,2,2,	0,270,340,1221,1364,2440,3411,4506,4750,5316,5543,5881,6026,7341,
chr1	36039205	36059994	gencode::TFAP2E::ENSG00000116819.6	0	+	36039205	36059994	0	12	2,2,2,2,2,2,2,2,2,2,2,2,	0,320,805,1342,1396,14723,14948,16323,16444,17027,17171,20787,
chr1	36068975	36106942	gencode::PSMB2::ENSG00000126067.7	0	-	36068975	36106942	0	10	2,2,2,2,2,2,2,2,2,2,	0,1856,1908,5869,6034,27897,27970,32933,33058,37965,
chr1	36181927	36184307	gencode::C1orf216::ENSG00000142686.7	0	-	36181927	36184307	0	2	2,2,	0,2378,
chr1	36186581	36235447	gencode::CLSPN::ENSG00000092853.9	0	-	36186581	36235447	0	49	2,2,2,2,2,2,2,2,2,2,2,2,2,2,2,2,2,2,2,2,2,2,2,2,2,2,2,2,2,2,2,2,2,2,2,2,2,2,2,2,2,2,2,2,2,2,2,2,2,	0,15626,15931,16095,16356,16441,17009,17117,17472,17602,18153,18277,18382,18549,22158,22261,22472,22550,24468,24582,25783,26012,26924,27081,27422,27624,28484,28551,28650,28831,30267,30526,32762,32956,39359,39936,40113,40224,41015,41090,41421,41501,42177,42341,43283,43734,44235,44346,48864,
chr1	36274036	36319097	gencode::AGO4::ENSG00000134698.10	0	+	36274036	36319097	0	34	2,2,2,2,2,2,2,2,2,2,2,2,2,2,2,2,2,2,2,2,2,2,2,2,2,2,2,2,2,2,2,2,2,2,	0,8444,8612,14424,14547,16875,17059,17241,17380,17488,17625,18310,18400,22989,23139,23374,23496,23619,23750,23999,24135,25552,25739,27396,27558,32727,33045,33178,33315,41719,41823,42416,42618,45059,
chr1	36335504	36385099	gencode::AGO1::ENSG00000092847.6	0	+	36335504	36385099	0	37	2,2,2,2,2,2,2,2,2,2,2,2,2,2,2,2,2,2,2,2,2,2,2,2,2,2,2,2,2,2,2,2,2,2,2,2,2,	0,13543,18521,18707,22651,22774,23191,23375,23768,23907,24131,24268,24409,24499,25216,25366,31568,31690,32042,32167,32298,32434,37029,37216,43936,44098,44278,44371,45442,45639,47687,47824,48416,48520,49149,49351,49593,
chr1	36396399	36521237	gencode::AGO3::ENSG00000126070.14	0	+	36396399	36521237	0	41	2,2,2,2,2,2,2,2,2,2,2,2,2,2,2,2,2,2,2,2,2,2,2,2,2,2,2,2,2,2,2,2,2,2,2,2,2,2,2,2,2,	0,428,647,14891,15065,36154,36277,41223,41434,42574,42713,51820,51914,53669,73540,73677,77889,77979,78096,78246,78674,78796,82829,82954,83114,83250,96313,96500,103373,103535,105376,105469,108989,109186,109506,109643,112646,112750,124145,124347,124836,
chr1	36549750	36553573	gencode::TEKT2::ENSG00000092850.7	0	+	36549750	36553573	0	18	2,2,2,2,2,2,2,2,2,2,2,2,2,2,2,2,2,2,	0,718,928,1011,1139,1684,1892,2552,2698,2779,2896,3052,3162,3287,3433,3576,3658,3821,
chr1	36554716	36558697	gencode::ADPRHL2::ENSG00000116863.10	0	+	36554716	36558697	0	10	2,2,2,2,2,2,2,2,2,2,	0,2126,2225,2500,2710,2792,2979,3304,3407,3979,
chr1	36565088	36590657	gencode::COL8A2::ENSG00000171812.6	0	-	36565088	36590657	0	6	2,2,2,2,2,2,	0,560,771,16218,16265,25567,
chr1	36602923	36614937	gencode::TRAPPC3::ENSG00000054116.7	0	-	36602923	36614937	0	12	2,2,2,2,2,2,2,2,2,2,2,2,	0,471,656,759,910,2395,2497,2744,2844,11767,11935,12012,
chr1	36622064	36645848	gencode::MAP7D1::ENSG00000116871.11	0	+	36622064	36645848	0	33	2,2,2,2,2,2,2,2,2,2,2,2,2,2,2,2,2,2,2,2,2,2,2,2,2,2,2,2,2,2,2,2,2,	0,14505,14852,15047,15118,15998,16164,16898,17015,18432,18545,19733,20118,20231,20379,21111,21407,21738,21953,22133,22219,22360,22455,22562,22796,22852,23046,23094,23200,23293,23408,23604,23782,
chr1	36690106	36769396	gencode::THRAP3::ENSG00000054118.9	0	+	36690106	36769396	0	24	2,2,2,2,2,2,2,2,2,2,2,2,2,2,2,2,2,2,2,2,2,2,2,2,	0,463,597,34874,34979,58025,58195,61860,62765,64552,65259,66866,67041,68090,68204,69343,69430,72075,72265,76378,76579,77045,77191,79288,
chr1	36772025	36786656	gencode::SH3D21::ENSG00000214193.5	0	+	36772025	36786656	0	30	2,2,2,2,2,2,2,2,2,2,2,2,2,2,2,2,2,2,2,2,2,2,2,2,2,2,2,2,2,2,	0,171,331,415,481,740,861,1090,1183,1343,1401,1491,1539,1682,1785,1962,2051,3121,3166,12644,12740,12833,12888,13015,13112,13248,14374,14488,14554,14629,
chr1	36788326	36789493	gencode::EVA1B::ENSG00000142694.6	0	-	36788326	36789493	0	4	2,2,2,2,	0,243,342,1165,
chr1	36789670	36793320	gencode::RP11-268J15.5::ENSG00000116883.8	0	+	36789670	36793320	0	2	2,2,	0,3648,
chr1	36807574	36851323	gencode::STK40::ENSG00000196182.6	0	-	36807574	36851323	0	21	2,2,2,2,2,2,2,2,2,2,2,2,2,2,2,2,2,2,2,2,2,	0,1475,1884,2006,2144,2291,6724,6842,12388,12443,13230,13460,16263,16409,16761,16864,19245,19367,25872,26111,43747,
chr1	36859754	36863367	gencode::LSM10::ENSG00000181817.5	0	-	36859754	36863367	0	2	2,2,	0,3611,
chr1	36883856	36915858	gencode::OSCP1::ENSG00000116885.14	0	-	36883856	36915858	0	22	2,2,2,2,2,2,2,2,2,2,2,2,2,2,2,2,2,2,2,2,2,2,	0,733,799,2218,2360,3892,3964,4510,4641,5105,5211,10220,13544,13627,14164,14334,20498,20655,22561,25746,25778,32000,
chr1	36921526	36929746	gencode::MRPS15::ENSG00000116898.7	0	-	36921526	36929746	0	14	2,2,2,2,2,2,2,2,2,2,2,2,2,2,	0,259,453,1995,2056,4764,4851,5336,5387,6160,6238,7878,7925,8218,
chr1	36931801	36948411	gencode::CSF3R::ENSG00000119535.13	0	-	36931801	36948411	0	33	2,2,2,2,2,2,2,2,2,2,2,2,2,2,2,2,2,2,2,2,2,2,2,2,2,2,2,2,2,2,2,2,2,	0,708,1027,1111,1355,1451,1619,1762,1872,2021,2953,3057,3449,3640,5230,5446,5863,5939,6035,6191,6314,6486,7232,7422,7561,7687,9174,9473,13230,13316,15275,15337,16608,
chr1	37267646	37499594	gencode::GRIK3::ENSG00000163873.5	0	-	37267646	37499594	0	29	2,2,2,2,2,2,2,2,2,2,2,2,2,2,2,2,2,2,2,2,2,2,2,2,2,2,2,2,2,	0,3192,4056,4281,15012,15232,17688,17809,23555,23781,39688,39894,48263,48379,51567,51677,57060,57206,57796,57972,67700,67756,70140,70324,78586,78846,88872,89051,231946,
chr1	37940230	37948337	gencode::ZC3H12A::ENSG00000163874.8	0	+	37940230	37948337	0	10	2,2,2,2,2,2,2,2,2,2,	0,827,1310,5658,5800,6969,7206,7802,7911,8105,
chr1	37959415	37980257	gencode::MEAF6::ENSG00000163875.11	0	-	37959415	37980257	0	16	2,2,2,2,2,2,2,2,2,2,2,2,2,2,2,2,	0,293,2068,2104,2730,2790,2890,2922,7987,8182,15461,15509,15638,15728,19606,20840,
chr1	38003613	38019606	gencode::SNIP1::ENSG00000163877.9	0	-	38003613	38019606	0	6	2,2,2,2,2,2,	0,2142,2743,14630,14735,15991,
chr1	38022676	38030626	gencode::DNALI1::ENSG00000163879.9	0	+	38022676	38030626	0	10	2,2,2,2,2,2,2,2,2,2,	0,525,673,2249,2421,4479,4660,5003,5170,7948,
chr1	38032608	38061359	gencode::GNL2::ENSG00000134697.8	0	-	38032608	38061359	0	30	2,2,2,2,2,2,2,2,2,2,2,2,2,2,2,2,2,2,2,2,2,2,2,2,2,2,2,2,2,2,	0,663,757,1265,1350,1841,2295,7333,7449,7655,7816,8585,8692,9418,9549,15213,15329,15768,15929,16857,16926,20301,20488,23696,23838,25702,25799,26752,26839,28749,
chr1	38077349	38100237	gencode::RSPO1::ENSG00000169218.9	0	-	38077349	38100237	0	19	2,2,2,2,2,2,2,2,2,2,2,2,2,2,2,2,2,2,2,	0,6,69,76,1244,2024,2215,2504,2656,4804,4998,17888,18209,18272,20164,20345,20607,20676,22886,
chr1	38148832	38156005	gencode::C1orf109::ENSG00000116922.10	0	-	38148832	38156005	0	10	2,2,2,2,2,2,2,2,2,2,	0,156,277,3110,3292,6443,6723,6726,7053,7171,
chr1	38158250	38173993	gencode::CDCA8::ENSG00000134690.6	0	+	38158250	38173993	0	20	2,2,2,2,2,2,2,2,2,2,2,2,2,2,2,2,2,2,2,2,	0,95,206,324,455,3329,3372,6324,6399,7855,7943,9173,9240,10671,10769,12860,12989,14397,14486,15741,
chr1	38179695	38230632	gencode::EPHA10::ENSG00000183317.12	0	-	38179695	38230632	0	39	2,2,2,2,2,2,2,2,2,2,2,2,2,2,2,2,2,2,2,2,2,2,2,2,2,2,2,2,2,2,2,2,2,2,2,2,2,2,2,	0,705,867,1829,1974,4463,4635,4793,5388,5584,5883,6035,6325,6531,6757,6821,7634,7822,7980,8273,9015,9143,9285,9349,13076,13187,17385,17559,21231,21367,38850,39203,40189,40347,42510,48060,48759,48826,50935,
chr1	38260404	38265238	gencode::MANEAL::ENSG00000185090.10	0	+	38260404	38265238	0	7	2,2,2,2,2,2,2,	0,900,1002,1114,2009,2088,4832,
chr1	38269669	38273463	gencode::YRDC::ENSG00000196449.3	0	-	38269669	38273463	0	8	2,2,2,2,2,2,2,2,	0,302,447,2857,2979,3101,3218,3792,
chr1	38273978	38274649	gencode::C1orf122::ENSG00000197982.12	0	+	38273978	38274649	0	3	2,2,2,	0,426,669,
chr1	38281238	38325202	gencode::MTF1::ENSG00000188786.9	0	-	38281238	38325202	0	20	2,2,2,2,2,2,2,2,2,2,2,2,2,2,2,2,2,2,2,2,	0,1850,1916,6552,7150,8141,8246,16676,16756,19510,19649,20102,20178,23056,23190,24351,24592,41682,42143,43962,
chr1	38292262	38293872	gencode::AL929472.1::ENSG00000230610.1	0	-	38292262	38293872	0	2	2,2,	0,1608,
chr1	38328102	38412661	gencode::INPP5B::ENSG00000204084.8	0	-	38328102	38412661	0	46	2,2,2,2,2,2,2,2,2,2,2,2,2,2,2,2,2,2,2,2,2,2,2,2,2,2,2,2,2,2,2,2,2,2,2,2,2,2,2,2,2,2,2,2,2,2,	0,1879,1993,3328,3458,4026,4113,6068,6184,10497,10735,11560,11725,13173,13286,15755,15893,16062,17652,17764,20374,20488,23205,23395,24455,24574,24918,25035,25810,25914,27124,27294,28925,29024,69623,78255,78368,81207,81239,81363,81463,83323,83420,83819,83904,84557,
chr1	38423935	38455541	gencode::SF3A3::ENSG00000183431.7	0	-	38423935	38455541	0	32	2,2,2,2,2,2,2,2,2,2,2,2,2,2,2,2,2,2,2,2,2,2,2,2,2,2,2,2,2,2,2,2,	0,1854,1912,9778,9871,11088,11201,11305,11472,18618,18690,20454,20564,20722,20792,21199,21270,22320,22461,23463,23548,25903,25997,26441,26516,29307,29415,29518,29573,31282,31332,31604,
chr1	38463231	38471028	gencode::FHL3::ENSG00000183386.5	0	-	38463231	38471028	0	10	2,2,2,2,2,2,2,2,2,2,	0,122,311,401,573,1412,1589,1695,1873,7795,
chr1	38478537	38489216	gencode::UTP11L::ENSG00000183520.7	0	+	38478537	38489216	0	14	2,2,2,2,2,2,2,2,2,2,2,2,2,2,	0,3491,3555,4800,4905,5596,5712,6191,6287,6385,6518,9831,9944,10677,
chr1	39305376	39325081	gencode::RRAGC::ENSG00000116954.7	0	-	39305376	39325081	0	12	2,2,2,2,2,2,2,2,2,2,2,2,	0,6232,6383,11908,12053,12667,12784,16001,16203,17172,17378,19703,
chr1	39330386	39347103	gencode::GJA9::ENSG00000131233.8	0	-	39330386	39347103	0	11	2,2,2,2,2,2,2,2,2,2,2,	0,2163,2295,2845,2896,8301,8376,8878,9195,11479,16715,
chr1	39330386	39338962	gencode::MYCBP::ENSG00000214114.4	0	-	39330386	39338962	0	8	2,2,2,2,2,2,2,2,	0,2163,2295,2845,2896,8301,8376,8574,
chr1	39352355	39407353	gencode::RHBDL2::ENSG00000158315.6	0	-	39352355	39407353	0	15	2,2,2,2,2,2,2,2,2,2,2,2,2,2,2,	0,1277,1341,6478,6541,9283,9386,24636,24751,29027,32281,32654,39268,42709,54996,
chr1	39457272	39469716	gencode::AKIRIN1::ENSG00000174574.11	0	+	39457272	39469716	0	8	2,2,2,2,2,2,2,2,	0,6568,6711,9369,9506,11744,11818,12442,
chr1	39492070	39500063	gencode::NDUFS5::ENSG00000168653.6	0	+	39492070	39500063	0	5	2,2,2,2,2,	0,4,2322,2542,7991,
chr1	39547215	39951209	gencode::MACF1::ENSG00000127603.19	0	+	39547215	39951209	0	209	2,2,2,2,2,2,2,2,2,2,2,2,2,2,2,2,2,2,2,2,2,2,2,2,2,2,2,2,2,2,2,2,2,2,2,2,2,2,2,2,2,2,2,2,2,2,2,2,2,2,2,2,2,2,2,2,2,2,2,2,2,2,2,2,2,2,2,2,2,2,2,2,2,2,2,2,2,2,2,2,2,2,2,2,2,2,2,2,2,2,2,2,2,2,2,2,2,2,2,2,2,2,2,2,2,2,2,2,2,2,2,2,2,2,2,2,2,2,2,2,2,2,2,2,2,2,2,2,2,2,2,2,2,2,2,2,2,2,2,2,2,2,2,2,2,2,2,2,2,2,2,2,2,2,2,2,2,2,2,2,2,2,2,2,2,2,2,2,2,2,2,2,2,2,2,2,2,2,2,2,2,2,2,2,2,2,2,2,2,2,2,2,2,2,2,2,2,2,2,2…	0,1817,1874,2621,2895,21157,123588,149636,149700,168468,168560,170300,170398,172752,172832,176390,176485,200662,201643,201758,201863,201972,202520,202642,202787,202885,203537,203667,203751,203847,204058,204215,205740,206019,210364,210495,211220,211300,211912,212076,213500,213607,214241,214339,216074,216202,218664,218819,221378,221535,228024,228153,228699,228885,229285,229457,233967,234148,234845,…
chr1	39957997	39991320	gencode::BMP8A::ENSG00000183682.7	0	+	39957997	39991320	0	12	2,2,2,2,2,2,2,2,2,2,2,2,	0,18846,19038,19428,19579,29048,29245,30075,30157,30679,30792,33321,
chr1	40026794	40041430	gencode::PABPC4::ENSG00000090621.9	0	-	40026794	40041430	0	30	2,2,2,2,2,2,2,2,2,2,2,2,2,2,2,2,2,2,2,2,2,2,2,2,2,2,2,2,2,2,	0,560,665,948,1081,1198,1294,2489,2619,2711,2800,3298,3420,3561,3651,3981,4256,6626,6724,7677,7817,8470,8567,8738,8880,10109,10227,11268,11464,14634,
chr1	40092852	40105217	gencode::HEYL::ENSG00000163909.6	0	-	40092852	40105217	0	9	2,2,2,2,2,2,2,2,2,	0,3044,3128,4313,4399,5466,5535,5729,12363,
chr1	40125158	40137575	gencode::NT5C1A::ENSG00000116981.3	0	-	40125158	40137575	0	10	2,2,2,2,2,2,2,2,2,2,	0,1590,1777,3823,3948,6032,6164,6580,6750,12415,
chr1	40148405	40156977	gencode::HPCAL4::ENSG00000116983.8	0	-	40148405	40156977	0	6	2,2,2,2,2,2,	0,1201,1419,1706,1878,8570,
chr1	40204603	40228325	gencode::PPIE::ENSG00000084072.12	0	+	40204603	40228325	0	20	2,2,2,2,2,2,2,2,2,2,2,2,2,2,2,2,2,2,2,2,	0,1231,1332,2432,2478,2961,2990,4282,4366,4890,4993,6441,6567,9969,10157,13976,14121,14353,23583,23720,
chr1	40226240	40253823	gencode::BMP8B::ENSG00000116985.6	0	-	40226240	40253823	0	13	2,2,2,2,2,2,2,2,2,2,2,2,2,	0,2521,2634,3223,4052,4249,4278,4440,13737,13888,14278,14470,27581,
chr1	40307585	40348989	gencode::TRIT1::ENSG00000043514.11	0	-	40307585	40348989	0	21	2,2,2,2,2,2,2,2,2,2,2,2,2,2,2,2,2,2,2,2,2,	0,2185,2305,2615,2727,5304,5384,5632,5747,6070,6184,8203,8348,9836,10815,10963,11881,12155,15361,15504,41402,
chr1	40363642	40367479	gencode::MYCL::ENSG00000116990.9	0	-	40363642	40367479	0	3	2,2,2,	0,3473,3835,
chr1	40421057	40435176	gencode::MFSD2A::ENSG00000168389.13	0	+	40421057	40435176	0	26	2,2,2,2,2,2,2,2,2,2,2,2,2,2,2,2,2,2,2,2,2,2,2,2,2,2,	0,1699,1836,3274,3440,9823,9949,10083,10164,10469,10629,11213,11306,11423,11547,11698,11784,12240,12326,12416,12531,12946,13092,13181,13360,14117,
chr1	40506455	40537121	gencode::CAP1::ENSG00000131236.12	0	+	40506455	40537121	0	26	2,2,2,2,2,2,2,2,2,2,2,2,2,2,2,2,2,2,2,2,2,2,2,2,2,2,	0,18,18548,18551,18675,19281,19387,20949,21029,23441,23587,23688,23776,25429,25537,26754,26934,28904,29091,29373,29499,29644,29729,30050,30196,30664,
chr1	40539855	40562786	gencode::PPT1::ENSG00000131238.12	0	-	40539855	40562786	0	17	2,2,2,2,2,2,2,2,2,2,2,2,2,2,2,2,2,	0,2656,2730,4374,4475,6211,6304,7998,15224,15329,17143,17216,17859,17989,18212,18324,22929,
chr1	40627308	40701463	gencode::RLF::ENSG00000117000.8	0	+	40627308	40701463	0	14	2,2,2,2,2,2,2,2,2,2,2,2,2,2,	0,27416,27573,29133,29217,33993,34128,40773,40978,60935,61074,69878,70022,74153,
chr1	40713902	40716954	gencode::TMCO2::ENSG00000188800.5	0	+	40713902	40716954	0	2	2,2,	0,3050,
chr1	40724066	40758116	gencode::ZMPSTE24::ENSG00000084073.4	0	+	40724066	40758116	0	18	2,2,2,2,2,2,2,2,2,2,2,2,2,2,2,2,2,2,	0,2442,2591,9389,9478,10022,10141,11578,11733,13497,13641,22946,23133,27528,27635,32457,32603,34048,
chr1	40767053	40782794	gencode::COL9A2::ENSG00000049089.9	0	-	40767053	40782794	0	62	2,2,2,2,2,2,2,2,2,2,2,2,2,2,2,2,2,2,2,2,2,2,2,2,2,2,2,2,2,2,2,2,2,2,2,2,2,2,2,2,2,2,2,2,2,2,2,2,2,2,2,2,2,2,2,2,2,2,2,2,2,2,	0,428,508,1237,1428,1747,1804,2146,2295,2423,2458,2544,2591,2680,2718,2936,3010,3092,3148,3410,3466,4331,4387,4759,4806,6062,6118,6319,6375,6808,6864,8554,8610,8727,8783,8880,8936,9330,9386,9709,9765,9846,9905,10116,10166,10278,10334,10675,10731,11072,11098,11190,11228,11347,11403,12821,12886,12968,13006,14206,14283,15739,
chr1	40862562	40887647	gencode::SMAP2::ENSG00000084070.7	0	+	40862562	40887647	0	18	2,2,2,2,2,2,2,2,2,2,2,2,2,2,2,2,2,2,	0,9843,9979,11760,11848,12864,12945,16123,16212,17266,17350,18379,18491,19283,19451,19887,20206,25083,
chr1	40915847	40928092	gencode::ZFP69B::ENSG00000187801.10	0	+	40915847	40928092	0	11	2,2,2,2,2,2,2,2,2,2,2,	0,478,487,913,4025,4113,6767,6896,7166,7264,12243,
chr1	40943566	40960592	gencode::ZFP69::ENSG00000187815.5	0	+	40943566	40960592	0	11	2,2,2,2,2,2,2,2,2,2,2,	0,1139,1436,1594,3866,3960,11191,11320,11632,11730,17024,
chr1	40974549	40980186	gencode::EXO5::ENSG00000164002.7	0	+	40974549	40980186	0	6	2,2,2,2,2,2,	0,571,748,853,913,5635,
chr1	40997459	41012233	gencode::ZNF684::ENSG00000117010.11	0	+	40997459	41012233	0	9	2,2,2,2,2,2,2,2,2,	0,1353,1394,8796,8925,9825,9923,12607,14772,
chr1	41092401	41131065	gencode::RIMS3::ENSG00000117016.5	0	-	41092401	41131065	0	15	2,2,2,2,2,2,2,2,2,2,2,2,2,2,2,	0,2078,2220,2539,2643,6337,6452,9184,9328,14977,15227,20936,21033,21113,38662,
chr1	41157539	41236068	gencode::NFYC::ENSG00000066136.15	0	+	41157539	41236068	0	35	2,2,2,2,2,2,2,2,2,2,2,2,2,2,2,2,2,2,2,2,2,2,2,2,2,2,2,2,2,2,2,2,2,2,2,	0,333,3736,3878,17749,20528,20602,20817,20954,29736,29837,31338,31407,31819,31925,43883,46966,47081,55664,55738,57703,57819,61281,61379,66251,66427,71018,71179,74726,74836,75048,75107,77486,77548,78527,
chr1	41250079	41303982	gencode::KCNQ4::ENSG00000117013.10	0	+	41250079	41303982	0	26	2,2,2,2,2,2,2,2,2,2,2,2,2,2,2,2,2,2,2,2,2,2,2,2,2,2,	0,32855,32948,33754,33883,34095,34273,34937,35065,35465,35578,35755,35853,37904,37995,39687,39851,46674,46897,48604,48706,50557,50691,53255,53387,53901,
chr1	41445501	41477329	gencode::CTPS1::ENSG00000171793.9	0	+	41445501	41477329	0	36	2,2,2,2,2,2,2,2,2,2,2,2,2,2,2,2,2,2,2,2,2,2,2,2,2,2,2,2,2,2,2,2,2,2,2,2,	0,2165,3446,3627,4989,5162,7540,7643,8762,8881,11333,11419,11933,12016,16085,17562,17697,21197,21288,22328,22425,23282,23347,26219,26265,27617,27716,28827,28885,28962,29061,29613,29760,30329,30425,31826,
chr1	41481900	41487294	gencode::SLFNL1::ENSG00000171790.11	0	-	41481900	41487294	0	12	2,2,2,2,2,2,2,2,2,2,2,2,	0,1003,1149,1404,1928,3995,4550,4633,4705,5299,5385,5392,
chr1	41493991	41707730	gencode::SCMH1::ENSG00000010803.12	0	-	41493991	41707730	0	35	2,2,2,2,2,2,2,2,2,2,2,2,2,2,2,2,2,2,2,2,2,2,2,2,2,2,2,2,2,2,2,2,2,2,2,	0,262,407,5661,5729,9040,9222,18085,18279,20368,20571,42273,42402,46897,47132,84961,85207,88600,88691,114556,114793,123292,123365,124277,124422,131403,131614,132553,132579,133042,133113,134457,157799,157931,213737,
chr1	41828016	41847287	gencode::FOXO6::ENSG00000204060.4	0	+	41828016	41847287	0	2	2,2,	0,19269,
chr1	41945173	41950208	gencode::EDN2::ENSG00000127129.5	0	-	41945173	41950208	0	8	2,2,2,2,2,2,2,2,	0,1590,1691,2961,3086,4542,4701,5033,
chr1	41976937	42384083	gencode::HIVEP3::ENSG00000127124.9	0	-	41976937	42384083	0	16	2,2,2,2,2,2,2,2,2,2,2,2,2,2,2,2,	0,1547,2484,7133,7222,13466,13644,64275,64423,68468,74052,117480,117681,189647,189729,407144,
chr1	42619211	42621205	gencode::GUCA2B::ENSG00000044012.3	0	+	42619211	42621205	0	4	2,2,2,2,	0,1137,1326,1992,
chr1	42628641	42630308	gencode::GUCA2A::ENSG00000197273.3	0	-	42628641	42630308	0	4	2,2,2,2,	0,430,640,1665,
chr1	42645496	42801296	gencode::FOXJ3::ENSG00000198815.4	0	-	42645496	42801296	0	30	2,2,2,2,2,2,2,2,2,2,2,2,2,2,2,2,2,2,2,2,2,2,2,2,2,2,2,2,2,2,	0,2089,2199,8909,9103,9475,9579,11475,11894,15062,15239,19274,19405,25934,26038,48055,48141,85287,85364,98520,98847,131222,131285,135518,135630,143856,144002,155097,155231,155798,
chr1	42846768	42880154	gencode::RIMKLA::ENSG00000177181.10	0	+	42846768	42880154	0	8	2,2,2,2,2,2,2,2,	0,18304,18537,23411,23500,28884,29090,33384,
chr1	42896529	42921558	gencode::ZMYND12::ENSG00000066185.8	0	-	42896529	42921558	0	14	2,2,2,2,2,2,2,2,2,2,2,2,2,2,	0,2282,2430,4413,4527,5560,5685,8995,9167,17606,17780,19057,19201,25027,
chr1	42922170	42925273	gencode::PPCS::ENSG00000127125.7	0	+	42922170	42925273	0	4	2,2,2,2,	0,574,745,3101,
chr1	42929328	43119488	gencode::CCDC30::ENSG00000186409.10	0	+	42929328	43119488	0	47	2,2,2,2,2,2,2,2,2,2,2,2,2,2,2,2,2,2,2,2,2,2,2,2,2,2,2,2,2,2,2,2,2,2,2,2,2,2,2,2,2,2,2,2,2,2,2,	0,9462,9646,16801,16909,19003,19159,26498,26572,33438,33556,35158,35259,57503,57599,71229,71332,72816,72944,75513,75653,79173,81750,81922,92496,92748,102636,102818,113360,113572,117700,117857,125661,125826,147318,147433,173577,173721,178813,178952,181033,181150,182475,182660,189716,189786,190158,
chr1	43124183	43142254	gencode::PPIH::ENSG00000171960.6	0	+	43124183	43142254	0	18	2,2,2,2,2,2,2,2,2,2,2,2,2,2,2,2,2,2,	0,329,396,713,858,1007,1054,2347,2392,6348,6443,7465,7555,8032,8075,8836,8928,18069,
chr1	43148402	43167651	gencode::YBX1::ENSG00000065978.13	0	+	43148402	43167651	0	14	2,2,2,2,2,2,2,2,2,2,2,2,2,2,	0,669,735,10756,10792,13465,13557,13908,14213,14446,14531,18047,18315,19247,
chr1	43200805	43205511	gencode::CLDN19::ENSG00000164007.6	0	-	43200805	43205511	0	7	2,2,2,2,2,2,2,	0,896,3092,3179,3284,3451,4704,
chr1	43212523	43232177	gencode::LEPRE1::ENSG00000117385.11	0	-	43212523	43232177	0	27	2,2,2,2,2,2,2,2,2,2,2,2,2,2,2,2,2,2,2,2,2,2,2,2,2,2,2,	0,560,868,946,1345,1465,3331,3484,5419,5517,5682,5812,8014,8138,8310,8365,8693,8785,10928,11070,11997,12131,12346,12538,15468,15623,19652,
chr1	43233061	43263768	gencode::C1orf50::ENSG00000164008.9	0	+	43233061	43263768	0	19	2,2,2,2,2,2,2,2,2,2,2,2,2,2,2,2,2,2,2,	0,116,234,6153,6170,6259,7344,7478,7816,8132,22403,22544,25412,25512,26208,26354,27020,27223,30705,
chr1	43272984	43282860	gencode::CCDC23::ENSG00000177868.7	0	-	43272984	43282860	0	7	2,2,2,2,2,2,2,	0,79,187,9115,9267,9438,9874,
chr1	43282924	43308187	gencode::ERMAP::ENSG00000164010.9	0	+	43282924	43308187	0	22	2,2,2,2,2,2,2,2,2,2,2,2,2,2,2,2,2,2,2,2,2,2,	0,8367,8485,13188,13280,13512,13862,17782,17901,18476,18511,19902,19937,21645,21668,22777,22800,22896,22925,23014,23043,25261,
chr1	43312328	43316620	gencode::ZNF691::ENSG00000164011.13	0	+	43312328	43316620	0	8	2,2,2,2,2,2,2,2,	0,2631,2756,2905,3085,3999,4086,4290,
chr1	43392912	43424304	gencode::SLC2A1::ENSG00000117394.15	0	-	43392912	43424304	0	18	2,2,2,2,2,2,2,2,2,2,2,2,2,2,2,2,2,2,	0,361,567,1688,1792,1966,2073,2282,2349,2539,2629,2794,3625,3802,3965,15982,16080,31390,
chr1	43610968	43621876	gencode::FAM183A::ENSG00000186973.6	0	+	43610968	43621876	0	7	2,2,2,2,2,2,2,	0,2787,5461,5523,7528,7634,10906,
chr1	43630164	43637950	gencode::EBNA1BP2::ENSG00000117395.6	0	-	43630164	43637950	0	18	2,2,2,2,2,2,2,2,2,2,2,2,2,2,2,2,2,2,	0,147,312,2330,2426,2664,2742,4443,4535,6260,6386,6983,7158,7390,7476,7557,7648,7784,
chr1	43638124	43719647	gencode::WDR65::ENSG00000243710.3	0	+	43638124	43719647	0	44	2,2,2,2,2,2,2,2,2,2,2,2,2,2,2,2,2,2,2,2,2,2,2,2,2,2,2,2,2,2,2,2,2,2,2,2,2,2,2,2,2,2,2,2,	0,276,279,457,9078,9397,11135,11424,12693,12903,14251,14406,25097,25239,26025,26193,26934,27050,34264,34479,37287,42799,42963,46926,47084,48916,49012,49649,49842,50368,50544,51590,51751,54527,54673,60052,60171,61823,61960,62039,62185,70771,70906,81521,
chr1	43735756	43738248	gencode::TMEM125::ENSG00000179178.6	0	+	43735756	43738248	0	7	2,2,2,2,2,2,2,	0,498,593,708,2096,2254,2490,
chr1	43748778	43751223	gencode::C1orf210::ENSG00000253313.1	0	-	43748778	43751223	0	5	2,2,2,2,2,	0,142,261,2334,2443,
chr1	43766800	43788321	gencode::TIE1::ENSG00000066056.9	0	+	43766800	43788321	0	45	2,2,2,2,2,2,2,2,2,2,2,2,2,2,2,2,2,2,2,2,2,2,2,2,2,2,2,2,2,2,2,2,2,2,2,2,2,2,2,2,2,2,2,2,2,	0,3719,4036,4101,4214,5708,5866,6010,6144,6300,6443,6664,6795,7739,7854,8002,8256,8403,10539,10700,10862,11002,11173,11472,12003,12296,12646,12839,16067,16280,16432,16545,16750,16943,18103,18219,18327,18400,20137,20180,20264,20363,20484,20586,21519,
chr1	43803598	43818188	gencode::MPL::ENSG00000117400.10	0	+	43803598	43818188	0	21	2,2,2,2,2,2,2,2,2,2,2,2,2,2,2,2,2,2,2,2,2,	0,169,304,612,793,1341,1642,2034,2199,2457,2586,8515,8702,8862,9007,10913,11075,11333,14286,14376,14588,
chr1	43824677	43828621	gencode::CDC20::ENSG00000117399.9	0	+	43824677	43828621	0	20	2,2,2,2,2,2,2,2,2,2,2,2,2,2,2,2,2,2,2,2,	0,158,390,481,632,716,815,960,1091,1184,1383,1490,1587,1724,1955,2111,2239,3186,3306,3942,
chr1	43829808	43833585	gencode::ELOVL1::ENSG00000066322.8	0	-	43829808	43833585	0	14	2,2,2,2,2,2,2,2,2,2,2,2,2,2,	0,184,323,402,510,598,657,788,871,1046,1239,1424,1486,3775,
chr1	43850223	43855429	gencode::MED8::ENSG00000159479.12	0	-	43850223	43855429	0	14	2,2,2,2,2,2,2,2,2,2,2,2,2,2,	0,554,1423,1674,2034,2118,2303,2446,2948,3095,3755,3876,3937,5204,
chr1	43855666	43916007	gencode::SZT2::ENSG00000198198.9	0	+	43855666	43916007	0	141	2,2,2,2,2,2,2,2,2,2,2,2,2,2,2,2,2,2,2,2,2,2,2,2,2,2,2,2,2,2,2,2,2,2,2,2,2,2,2,2,2,2,2,2,2,2,2,2,2,2,2,2,2,2,2,2,2,2,2,2,2,2,2,2,2,2,2,2,2,2,2,2,2,2,2,2,2,2,2,2,2,2,2,2,2,2,2,2,2,2,2,2,2,2,2,2,2,2,2,2,2,2,2,2,2,2,2,2,2,2,2,2,2,2,2,2,2,2,2,2,2,2,2,2,2,2,2,2,2,2,2,2,2,2,2,2,2,2,2,2,2,	0,13179,13307,13603,13779,14382,14555,16285,25084,25218,25962,26106,26537,26646,29736,29949,30155,30328,30751,30988,31176,31308,32085,32230,32482,32637,32771,32888,33101,33321,34219,34437,34786,34867,35115,35212,35476,35647,35837,35954,36040,36156,36717,36814,37058,37184,37283,37450,37532,37739,38005,38123,38242,38491,39705,39849,40013,40108,40313,40394,40498,40794,40951,41095,41267,41377,41462,4…
chr1	43916982	43919265	gencode::HYI::ENSG00000178922.12	0	-	43916982	43919265	0	15	2,2,2,2,2,2,2,2,2,2,2,2,2,2,2,	0,233,334,406,484,536,621,702,891,1008,1589,1693,2072,2186,2281,
chr1	43996761	44087605	gencode::PTPRF::ENSG00000142949.12	0	+	43996761	44087605	0	68	2,2,2,2,2,2,2,2,2,2,2,2,2,2,2,2,2,2,2,2,2,2,2,2,2,2,2,2,2,2,2,2,2,2,2,2,2,2,2,2,2,2,2,2,2,2,2,2,2,2,2,2,2,2,2,2,2,2,2,2,2,2,2,2,2,2,2,2,	0,7105,7187,13938,14076,22399,22547,22707,22851,38497,38688,47717,47830,57638,57910,59879,60463,60719,60858,61364,61511,66655,66963,67627,67823,70978,71007,72323,72443,72518,73099,73810,73910,74097,74353,74436,74532,75147,75368,75721,75878,78290,78408,81675,81710,82525,82625,86352,86478,86643,86821,87537,87659,87955,88112,88195,88483,88587,88768,89002,89131,89361,89489,89745,89902,90004,90142,908…
chr1	44115923	44169900	gencode::KDM4A::ENSG00000066135.8	0	+	44115923	44169900	0	42	2,2,2,2,2,2,2,2,2,2,2,2,2,2,2,2,2,2,2,2,2,2,2,2,2,2,2,2,2,2,2,2,2,2,2,2,2,2,2,2,2,2,	0,2882,3061,5336,5514,10043,10160,12639,12835,15441,15493,16197,16303,16699,16839,17517,17767,18845,19047,21250,21623,33429,33552,38659,38843,40590,40797,41241,41320,42001,42059,43739,43850,44454,44642,47588,47761,53362,53484,53765,53860,53975,
chr1	44173364	44395803	gencode::ST3GAL3::ENSG00000126091.15	0	+	44173364	44395803	0	24	2,2,2,2,2,2,2,2,2,2,2,2,2,2,2,2,2,2,2,2,2,2,2,2,	0,28537,28732,84406,84456,107196,107241,117036,117200,130524,130619,186688,186785,190540,190606,191473,191597,191846,192035,212709,212858,213087,213236,222437,
chr1	44399557	44401973	gencode::ARTN::ENSG00000117407.12	0	+	44399557	44401973	0	7	2,2,2,2,2,2,2,	0,224,375,1702,1767,1831,2414,
chr1	44413356	44433257	gencode::IPO13::ENSG00000117408.6	0	+	44413356	44433257	0	37	2,2,2,2,2,2,2,2,2,2,2,2,2,2,2,2,2,2,2,2,2,2,2,2,2,2,2,2,2,2,2,2,2,2,2,2,2,	0,1730,2469,8633,8776,8873,9017,9123,9292,9508,9631,9715,9865,10290,10474,10555,10584,10774,10911,11059,11205,12562,12645,13189,13329,13479,13578,16582,16637,18957,19037,19098,19243,19335,19628,19812,19899,
chr1	44435994	44438086	gencode::DPH2::ENSG00000132768.9	0	+	44435994	44438086	0	10	2,2,2,2,2,2,2,2,2,2,	0,271,386,641,867,1062,1748,1833,2012,2090,
chr1	44440969	44443652	gencode::ATP6V0B::ENSG00000117410.9	0	+	44440969	44443652	0	13	2,2,2,2,2,2,2,2,2,2,2,2,2,	0,500,551,790,876,1002,1082,1290,1362,1473,1527,1726,2681,
chr1	44445183	44455969	gencode::B4GALT2::ENSG00000117411.12	0	+	44445183	44455969	0	14	2,2,2,2,2,2,2,2,2,2,2,2,2,2,	0,535,1103,1595,1962,2175,2413,5351,5544,5764,5889,6003,6110,10784,
chr1	44457676	44461609	gencode::CCDC24::ENSG00000159214.8	0	+	44457676	44461609	0	14	2,2,2,2,2,2,2,2,2,2,2,2,2,2,	0,205,383,516,635,1880,1960,3101,3158,3594,3666,3771,3852,3931,
chr1	44463411	44496977	gencode::SLC6A9::ENSG00000196517.7	0	-	44463411	44496977	0	28	2,2,2,2,2,2,2,2,2,2,2,2,2,2,2,2,2,2,2,2,2,2,2,2,2,2,2,2,	0,113,286,3025,3316,3422,3559,3648,3888,4571,4677,4770,4907,5111,5246,10611,10884,12223,12357,12984,13143,13819,13983,18652,19305,26506,26623,33564,
chr1	44584660	44598909	gencode::KLF17::ENSG00000171872.4	0	+	44584660	44598909	0	6	2,2,2,2,2,2,	0,10362,11208,11521,11768,14247,
chr1	44679199	44686230	gencode::DMAP1::ENSG00000178028.9	0	+	44679199	44686230	0	21	2,2,2,2,2,2,2,2,2,2,2,2,2,2,2,2,2,2,2,2,2,	0,179,219,331,820,914,1173,1371,4781,4942,5058,5228,5526,5714,5876,5950,6276,6351,6487,6782,7029,
chr1	44687312	44820563	gencode::ERI3::ENSG00000117419.10	0	-	44687312	44820563	0	17	2,2,2,2,2,2,2,2,2,2,2,2,2,2,2,2,2,	0,26296,26398,63192,63267,86667,86761,91526,91588,97985,98104,101082,117402,117682,131207,131285,133249,
chr1	44871198	45116375	gencode::RNF220::ENSG00000187147.13	0	+	44871198	45116375	0	29	2,2,2,2,2,2,2,2,2,2,2,2,2,2,2,2,2,2,2,2,2,2,2,2,2,2,2,2,2,	0,4,6452,7196,18613,208636,208771,217213,217261,220768,220872,226814,226859,230016,230140,230501,230636,239169,239268,239466,239555,239692,239750,239962,244132,244243,244354,244431,245175,
chr1	45102129	45140002	gencode::TMEM53::ENSG00000126106.9	0	-	45102129	45140002	0	6	2,2,2,2,2,2,	0,8900,18752,23714,23838,37871,
chr1	45140545	45190962	gencode::C1orf228::ENSG00000198520.6	0	+	45140545	45190962	0	24	2,2,2,2,2,2,2,2,2,2,2,2,2,2,2,2,2,2,2,2,2,2,2,2,	0,13320,13446,14800,15030,22226,22297,23187,23356,26047,26246,29213,29300,49246,49371,49444,49519,49663,49795,49886,49966,50260,50344,50415,
chr1	45205674	45232768	gencode::KIF2C::ENSG00000142945.8	0	+	45205674	45232768	0	42	2,2,2,2,2,2,2,2,2,2,2,2,2,2,2,2,2,2,2,2,2,2,2,2,2,2,2,2,2,2,2,2,2,2,2,2,2,2,2,2,2,2,	0,908,1005,6444,6757,7379,7483,7647,7698,10437,10562,13127,13252,13728,13831,14745,14843,15924,15981,16070,16235,17551,17644,17903,17969,18044,18138,19201,19346,20275,20482,20587,20700,21911,21981,22341,22449,22540,22656,26821,26947,27092,
chr1	45241272	45244247	gencode::RPS8::ENSG00000142937.7	0	+	45241272	45244247	0	10	2,2,2,2,2,2,2,2,2,2,	0,431,540,1072,1174,2011,2189,2397,2529,2973,
chr1	45250155	45253225	gencode::BEST4::ENSG00000142959.4	0	-	45250155	45253225	0	16	2,2,2,2,2,2,2,2,2,2,2,2,2,2,2,2,	0,143,300,419,502,622,822,1113,1193,1588,1745,1977,2213,2886,2983,3068,
chr1	45266345	45271158	gencode::PLK3::ENSG00000173846.8	0	+	45266345	45271158	0	28	2,2,2,2,2,2,2,2,2,2,2,2,2,2,2,2,2,2,2,2,2,2,2,2,2,2,2,2,	0,164,274,360,479,946,1078,1169,1259,2084,2182,2279,2480,2592,2718,2924,3018,3255,3351,3487,3573,3663,3828,3974,4106,4590,4706,4811,
chr1	45272347	45272455	gencode::TCTEX1D4::ENSG00000188396.2	0	-	45272347	45272455	0	2	2,2,	0,106,
chr1	45274578	45279309	gencode::BTBD19::ENSG00000222009.4	0	+	45274578	45279309	0	16	2,2,2,2,2,2,2,2,2,2,2,2,2,2,2,2,	0,1304,1520,1645,1701,3130,3192,3549,3616,4087,4158,4229,4363,4465,4593,4729,
chr1	45286376	45308532	gencode::PTCH2::ENSG00000117425.9	0	-	45286376	45308532	0	43	2,2,2,2,2,2,2,2,2,2,2,2,2,2,2,2,2,2,2,2,2,2,2,2,2,2,2,2,2,2,2,2,2,2,2,2,2,2,2,2,2,2,2,	0,1965,2362,2464,2536,2681,5543,5683,5781,6064,6195,6378,6460,6605,6695,7010,7136,7487,7589,7710,7799,7927,8275,8370,8450,8608,8695,8829,8907,9057,9202,9326,10141,10339,10999,11093,11268,11340,11445,11637,21140,21335,22154,
chr1	45316675	45452164	gencode::EIF2B3::ENSG00000070785.12	0	-	45316675	45452164	0	21	2,2,2,2,2,2,2,2,2,2,2,2,2,2,2,2,2,2,2,2,2,	0,6698,6804,23823,24612,24692,28812,29005,30606,30736,46349,46441,75622,75736,90500,90662,127309,127457,130015,130174,135487,
chr1	45469248	45476560	gencode::HECTD3::ENSG00000126107.10	0	-	45469248	45476560	0	39	2,2,2,2,2,2,2,2,2,2,2,2,2,2,2,2,2,2,2,2,2,2,2,2,2,2,2,2,2,2,2,2,2,2,2,2,2,2,2,	0,90,164,276,360,481,558,669,801,1021,1230,2215,2307,2418,2540,3113,3219,3372,3439,3640,3695,3834,4019,4661,4957,5125,5565,5650,5790,5906,5989,6107,6407,6545,6622,6717,6967,7130,7310,
chr1	45477957	45481008	gencode::UROD::ENSG00000126088.8	0	+	45477957	45481008	0	18	2,2,2,2,2,2,2,2,2,2,2,2,2,2,2,2,2,2,	0,619,734,848,930,1004,1069,1306,1506,1621,1785,2151,2291,2448,2551,2652,2721,3049,
chr1	45484988	45671427	gencode::ZSWIM5::ENSG00000162415.6	0	-	45484988	45671427	0	26	2,2,2,2,2,2,2,2,2,2,2,2,2,2,2,2,2,2,2,2,2,2,2,2,2,2,	0,747,831,1306,1472,14993,15153,16369,16507,16720,16983,19617,19757,21073,21222,23900,24079,31755,31937,39290,39443,40780,40931,68562,68921,186437,
chr1	45795109	45805890	gencode::MUTYH::ENSG00000132781.13	0	-	45795109	45805890	0	34	2,2,2,2,2,2,2,2,2,2,2,2,2,2,2,2,2,2,2,2,2,2,2,2,2,2,2,2,2,2,2,2,2,2,	0,1076,1120,1742,1897,1980,2119,2221,2412,2583,2649,2726,2873,2951,3051,3134,3250,3323,3397,3478,3522,3657,3733,3845,3887,3973,4166,4951,5074,9067,9219,10459,10536,10779,
chr1	45805976	45808753	gencode::TOE1::ENSG00000132773.7	0	+	45805976	45808753	0	14	2,2,2,2,2,2,2,2,2,2,2,2,2,2,	0,766,911,996,1039,1166,1265,1642,1803,2077,2339,2536,2698,2775,
chr1	45811230	45956523	gencode::TESK2::ENSG00000070759.12	0	-	45811230	45956523	0	23	2,2,2,2,2,2,2,2,2,2,2,2,2,2,2,2,2,2,2,2,2,2,2,	0,316,436,1132,1221,1418,1504,2048,2135,2357,2442,9742,9891,40351,40402,53422,68206,68312,76164,76288,112003,112313,145291,
chr1	45960838	45965203	gencode::CCDC163P::ENSG00000236624.4	0	-	45960838	45965203	0	9	2,2,2,2,2,2,2,2,2,	0,249,307,1457,2130,2217,4176,4277,4363,
chr1	45966085	45974467	gencode::MMACHC::ENSG00000132763.10	0	+	45966085	45974467	0	6	2,2,2,2,2,2,	0,6940,7137,7796,7951,8380,
chr1	45977086	45987500	gencode::PRDX1::ENSG00000117450.9	0	-	45977086	45987500	0	11	2,2,2,2,2,2,2,2,2,2,2,	0,3090,3223,3456,3581,4237,4393,7521,7640,10192,10412,
chr1	46016827	46035562	gencode::AKR1A1::ENSG00000117448.9	0	+	46016827	46035562	0	17	2,2,2,2,2,2,2,2,2,2,2,2,2,2,2,2,2,	0,1278,1408,10631,10723,15411,15533,15711,16824,17022,17327,17529,17769,17844,17985,18074,18733,
chr1	46049877	46083732	gencode::NASP::ENSG00000132780.12	0	+	46049877	46083732	0	30	2,2,2,2,2,2,2,2,2,2,2,2,2,2,2,2,2,2,2,2,2,2,2,2,2,2,2,2,2,2,	0,7015,7065,16177,16252,18047,18160,20728,20811,22274,22386,23113,24132,28961,29043,29888,29976,30085,30161,30805,30996,31097,31266,32129,32188,32418,32498,33255,33386,33853,
chr1	46086105	46089407	gencode::CCDC17::ENSG00000159588.10	0	-	46086105	46089407	0	24	2,2,2,2,2,2,2,2,2,2,2,2,2,2,2,2,2,2,2,2,2,2,2,2,	0,287,400,467,680,845,1051,1202,1302,1441,1562,1805,1915,2113,2234,2315,2401,2519,2684,2781,3006,3121,3219,3300,
chr1	46094080	46152083	gencode::GPBP1L1::ENSG00000159592.6	0	-	46094080	46152083	0	24	2,2,2,2,2,2,2,2,2,2,2,2,2,2,2,2,2,2,2,2,2,2,2,2,	0,1165,1270,2071,2198,5078,5239,5685,5828,11799,11995,14016,14091,26132,26421,26779,26911,30617,30734,31773,32817,57165,57212,58001,
chr1	46153947	46158875	gencode::TMEM69::ENSG00000159596.6	0	+	46153947	46158875	0	4	2,2,2,2,	0,2696,2835,4926,
chr1	46165862	46216268	gencode::IPP::ENSG00000197429.6	0	-	46165862	46216268	0	16	2,2,2,2,2,2,2,2,2,2,2,2,2,2,2,2,	0,14053,14276,16702,16827,19010,19150,27438,27608,29421,29579,40708,41142,45927,46271,50404,
chr1	46269744	46500209	gencode::MAST2::ENSG00000086015.16	0	+	46269744	46500209	0	56	2,2,2,2,2,2,2,2,2,2,2,2,2,2,2,2,2,2,2,2,2,2,2,2,2,2,2,2,2,2,2,2,2,2,2,2,2,2,2,2,2,2,2,2,2,2,2,2,2,2,2,2,2,2,2,2,	0,20358,20508,25364,25509,78289,78323,155311,155405,193649,193727,198730,198811,202166,202323,204221,204299,206655,206867,215521,215625,217875,218010,218835,218899,219158,219246,219697,219908,221602,221743,223656,223791,224693,224861,225391,225495,225756,225881,226054,226166,226532,226689,226932,227218,227316,227513,228103,228332,228521,228646,229727,229866,229998,230194,230463,
chr1	46509543	46641899	gencode::PIK3R3::ENSG00000117461.10	0	-	46509543	46641899	0	24	2,2,2,2,2,2,2,2,2,2,2,2,2,2,2,2,2,2,2,2,2,2,2,2,	0,2044,2217,2677,2754,11921,12100,18055,18200,22180,22308,23037,23220,33641,33742,36768,36879,87837,87844,87973,88085,88825,88910,132354,
chr1	46641081	46651157	gencode::TSPAN1::ENSG00000117472.5	0	+	46641081	46651157	0	16	2,2,2,2,2,2,2,2,2,2,2,2,2,2,2,2,	0,5114,5249,5688,5755,8779,8988,9182,9259,9373,9474,9548,9706,9813,9899,10074,
chr1	46654652	46664007	gencode::POMGNT1::ENSG00000085998.9	0	-	46654652	46664007	0	45	2,2,2,2,2,2,2,2,2,2,2,2,2,2,2,2,2,2,2,2,2,2,2,2,2,2,2,2,2,2,2,2,2,2,2,2,2,2,2,2,2,2,2,2,2,	0,259,377,475,587,871,1009,1490,1537,1737,1804,3115,3243,3325,3456,3535,3610,3917,3978,4191,4235,4322,4408,4581,4659,4872,4945,5291,5421,5570,5671,5861,5981,6828,6944,7029,7097,7748,7869,7987,8104,8325,8719,8891,9353,
chr1	46669296	46685370	gencode::LURAP1::ENSG00000171357.5	0	+	46669296	46685370	0	2	2,2,	0,16072,
chr1	46713418	46743743	gencode::RAD54L::ENSG00000085999.7	0	+	46713418	46743743	0	36	2,2,2,2,2,2,2,2,2,2,2,2,2,2,2,2,2,2,2,2,2,2,2,2,2,2,2,2,2,2,2,2,2,2,2,2,	0,595,662,763,852,2251,2373,10937,11000,12215,12353,12793,12865,12978,13269,13512,13639,19710,19863,22910,23039,24717,24794,24923,25056,25606,25719,25875,26001,26389,26470,26789,26971,30068,30234,30323,
chr1	46744756	46768795	gencode::LRRC41::ENSG00000132128.12	0	-	46744756	46768795	0	18	2,2,2,2,2,2,2,2,2,2,2,2,2,2,2,2,2,2,	0,95,173,405,530,1105,1206,1309,1476,2038,2301,6275,7415,18476,18549,19197,19286,24037,
chr1	46769492	46782223	gencode::UQCRH::ENSG00000173660.7	0	+	46769492	46782223	0	6	2,2,2,2,2,2,	0,5278,5307,6332,6496,12729,
chr1	46806591	46827241	gencode::NSUN4::ENSG00000117481.6	0	+	46806591	46827241	0	12	2,2,2,2,2,2,2,2,2,2,2,2,	0,401,578,3879,4225,5999,6156,11946,12109,19782,19909,20648,
chr1	46860215	46879118	gencode::FAAH::ENSG00000117480.11	0	+	46860215	46879118	0	28	2,2,2,2,2,2,2,2,2,2,2,2,2,2,2,2,2,2,2,2,2,2,2,2,2,2,2,2,	0,7545,7661,10468,10605,10826,10962,11042,11251,11492,11535,11698,11825,13913,14041,14555,14655,15852,15954,16268,16311,17066,17108,17597,17708,18529,18677,18901,
chr1	46972836	46977714	gencode::DMBX1::ENSG00000197587.6	0	+	46972836	46977714	0	6	2,2,2,2,2,2,	0,3294,3490,3768,4119,4876,
chr1	47013481	47016736	gencode::KNCN::ENSG00000162456.5	0	-	47013481	47016736	0	6	2,2,2,2,2,2,	0,1381,1458,2122,2193,3253,
chr1	47024472	47082382	gencode::MKNK1::ENSG00000079277.15	0	-	47024472	47082382	0	27	2,2,2,2,2,2,2,2,2,2,2,2,2,2,2,2,2,2,2,2,2,2,2,2,2,2,2,	0,1431,1477,2675,2842,3846,4043,6238,6336,9640,9698,12614,12739,13260,13367,16220,17772,17854,21827,24425,24529,27071,35310,35480,45382,45424,57908,
chr1	47075356	47082382	gencode::MOB3C::ENSG00000142961.10	0	-	47075356	47082382	0	6	2,2,2,2,2,2,	0,315,520,3217,5284,7024,
chr1	47101642	47133728	gencode::ATPAF1::ENSG00000123472.8	0	-	47101642	47133728	0	19	2,2,2,2,2,2,2,2,2,2,2,2,2,2,2,2,2,2,2,	0,7221,7331,9188,9286,16608,16658,17844,17897,22154,22219,22714,22767,27860,27953,29283,29394,29674,32084,
chr1	47124409	47183574	gencode::EFCAB14::ENSG00000159658.6	0	-	47124409	47183574	0	23	2,2,2,2,2,2,2,2,2,2,2,2,2,2,2,2,2,2,2,2,2,2,2,	0,6516,6627,19899,24560,24688,25751,25865,28044,28133,29613,29807,30847,30954,33087,33200,37811,37912,49166,49314,57555,57706,59163,
chr1	47137643	47138544	gencode::TEX38::ENSG00000186118.7	0	+	47137643	47138544	0	2	2,2,	0,899,
chr1	47264933	47284302	gencode::CYP4B1::ENSG00000142973.8	0	+	47264933	47284302	0	22	2,2,2,2,2,2,2,2,2,2,2,2,2,2,2,2,2,2,2,2,2,2,	0,11544,11688,11876,11923,13232,13362,14218,14345,14645,14802,14945,15054,15810,16003,17784,17920,18701,18768,18867,18952,19367,
chr1	47394951	47406910	gencode::CYP4A11::ENSG00000187048.8	0	-	47394951	47406910	0	23	2,2,2,2,2,2,2,2,2,2,2,2,2,2,2,2,2,2,2,2,2,2,2,	0,759,1031,3558,3701,3768,4664,4852,4894,5087,5171,5282,5717,5875,6241,6368,7382,7512,8020,8067,8714,8858,11957,
chr1	47427428	47515671	gencode::CYP4X1::ENSG00000186377.6	0	+	47427428	47515671	0	23	2,2,2,2,2,2,2,2,2,2,2,2,2,2,2,2,2,2,2,2,2,2,2,	0,62238,68231,68375,69677,69724,71482,71612,74047,74177,74258,74415,76901,77010,77583,77776,84708,84844,86806,86873,87663,87748,88241,
chr1	47533339	47583437	gencode::CYP4Z1::ENSG00000186160.4	0	+	47533339	47583437	0	22	2,2,2,2,2,2,2,2,2,2,2,2,2,2,2,2,2,2,2,2,2,2,	0,952,1096,12953,13000,14664,14794,16950,17077,17154,17311,26896,27002,31424,31617,38458,38594,47859,47926,48980,49065,50096,
chr1	47603352	47614273	gencode::CYP4A22::ENSG00000162365.7	0	+	47603352	47614273	0	21	2,2,2,2,2,2,2,2,2,2,2,2,2,2,2,2,2,2,2,2,2,	0,3097,3241,3888,3935,4425,4555,5586,5713,6079,6236,6674,6783,6867,7060,7102,7290,8183,8250,8394,10919,
chr1	47649715	47656371	gencode::PDZK1IP1::ENSG00000162366.3	0	-	47649715	47656371	0	8	2,2,2,2,2,2,2,2,	0,956,1054,3273,3384,5820,5969,6654,
chr1	47685846	47697328	gencode::TAL1::ENSG00000162367.7	0	-	47685846	47697328	0	8	2,2,2,2,2,2,2,2,	0,3827,3930,5266,5715,9019,9177,11480,
chr1	47717594	47779707	gencode::STIL::ENSG00000123473.11	0	-	47717594	47779707	0	34	2,2,2,2,2,2,2,2,2,2,2,2,2,2,2,2,2,2,2,2,2,2,2,2,2,2,2,2,2,2,2,2,2,2,	0,8364,8617,10978,11194,17710,17944,20151,20319,28316,29287,30420,30537,35626,35738,37510,37663,41533,41622,43840,43926,47980,48230,49636,49826,50309,50424,52964,53074,58351,58440,61023,61234,62111,
chr1	47799788	47842375	gencode::CMPK1::ENSG00000162368.9	0	+	47799788	47842375	0	11	2,2,2,2,2,2,2,2,2,2,2,	0,24179,34350,34499,38836,38991,40790,40869,41078,41177,42585,
chr1	48231778	48462359	gencode::TRABD2B::ENSG00000269113.3	0	-	48231778	48462359	0	12	2,2,2,2,2,2,2,2,2,2,2,2,	0,9061,9333,12345,12438,28477,28654,35364,35513,227925,228491,230579,
chr1	48688570	48713006	gencode::SLC5A9::ENSG00000117834.8	0	+	48688570	48713006	0	28	2,2,2,2,2,2,2,2,2,2,2,2,2,2,2,2,2,2,2,2,2,2,2,2,2,2,2,2,	0,1823,1897,5949,6056,6202,6279,6394,6561,7699,7807,8644,8727,9045,9253,9466,9604,10754,10864,12828,12981,14778,14949,16421,16639,19556,19718,24434,
chr1	48764565	48937629	gencode::SPATA6::ENSG00000132122.7	0	-	48764565	48937629	0	24	2,2,2,2,2,2,2,2,2,2,2,2,2,2,2,2,2,2,2,2,2,2,2,2,	0,6891,6985,56774,56876,60690,60877,86413,86456,96371,96461,100455,100751,104906,104989,112568,112695,114214,114258,152656,152707,154098,154238,173062,
chr1	48999965	50489434	gencode::AGBL4::ENSG00000186094.12	0	-	48999965	50489434	0	27	2,2,2,2,2,2,2,2,2,2,2,2,2,2,2,2,2,2,2,2,2,2,2,2,2,2,2,	0,594,623,5346,5445,52708,52873,56537,56692,100311,119041,119158,128856,128948,146526,283929,332895,332937,511288,511507,711474,711571,1163017,1163144,1317100,1317225,1489467,
chr1	49193715	49242277	gencode::BEND5::ENSG00000162373.8	0	-	49193715	49242277	0	10	2,2,2,2,2,2,2,2,2,2,	0,8193,8409,14577,14728,30854,31241,33291,33427,48560,
chr1	50513854	50666480	gencode::ELAVL4::ENSG00000162374.12	0	+	50513854	50666480	0	16	2,2,2,2,2,2,2,2,2,2,2,2,2,2,2,2,	0,55818,58211,61016,61782,96772,97015,128904,129010,145580,145736,147376,147604,149244,149285,152624,
chr1	50885406	50888787	gencode::DMRTA2::ENSG00000142700.7	0	-	50885406	50888787	0	4	2,2,2,2,	0,1241,1810,3379,
chr1	50907195	51425812	gencode::FAF1::ENSG00000185104.15	0	-	50907195	51425812	0	39	2,2,2,2,2,2,2,2,2,2,2,2,2,2,2,2,2,2,2,2,2,2,2,2,2,2,2,2,2,2,2,2,2,2,2,2,2,2,2,	0,33938,34156,49062,49142,50195,50278,93843,93934,98066,98205,125551,125708,141092,141176,142126,142192,143159,143288,154595,154693,170805,213916,214005,264260,264368,297337,297431,303158,303252,346474,346682,360105,360154,416403,416474,518241,518330,518615,
chr1	51426475	51439564	gencode::CDKN2C::ENSG00000123080.6	0	+	51426475	51439564	0	6	2,2,2,2,2,2,	0,7130,9096,9552,9694,13087,
chr1	51567921	51613138	gencode::C1orf185::ENSG00000204006.4	0	+	51567921	51613138	0	9	2,2,2,2,2,2,2,2,2,	0,110,10212,10320,16414,16552,43472,43511,45215,
chr1	51702551	51736822	gencode::RNF11::ENSG00000123091.4	0	+	51702551	51736822	0	4	2,2,2,2,	0,33074,33246,34269,
chr1	51753952	51810662	gencode::TTC39A::ENSG00000085831.11	0	-	51753952	51810662	0	37	2,2,2,2,2,2,2,2,2,2,2,2,2,2,2,2,2,2,2,2,2,2,2,2,2,2,2,2,2,2,2,2,2,2,2,2,2,	0,556,675,1722,1839,2231,2345,6108,6231,7890,9508,13289,13453,14136,14223,14293,14801,14912,16798,16866,17694,17796,20978,21150,22971,23041,23836,23915,24529,24663,33438,33545,33835,41756,42154,42871,56708,
chr1	51822518	51984870	gencode::EPS15::ENSG00000085832.12	0	-	51822518	51984870	0	49	2,2,2,2,2,2,2,2,2,2,2,2,2,2,2,2,2,2,2,2,2,2,2,2,2,2,2,2,2,2,2,2,2,2,2,2,2,2,2,2,2,2,2,2,2,2,2,2,2,	0,4322,4509,7017,7182,9104,9183,37532,37601,42183,42319,44069,44107,45586,45679,46570,46686,49056,49262,51286,51486,52686,52850,64937,65012,66359,83498,83586,88040,88199,90111,90259,91197,91289,104242,104304,106824,106952,108412,108480,111624,111722,114841,114891,116010,116102,124424,124468,162350,
chr1	52042928	52253386	gencode::OSBPL9::ENSG00000117859.14	0	+	52042928	52253386	0	57	2,2,2,2,2,2,2,2,2,2,2,2,2,2,2,2,2,2,2,2,2,2,2,2,2,2,2,2,2,2,2,2,2,2,2,2,2,2,2,2,2,2,2,2,2,2,2,2,2,2,2,2,2,2,2,2,2,	0,20865,20937,37046,37163,39615,39965,74732,74785,92175,92256,92558,136744,136823,152745,152868,162884,162955,168277,168375,169451,169501,171110,171142,172886,172939,179061,179102,183431,183524,184608,184715,188563,188725,194811,194926,195346,195467,199574,199662,203905,204079,205300,205387,206656,206769,207005,207071,207183,207326,208549,208630,209267,209361,210094,210232,210456,
chr1	52255105	52344333	gencode::NRD1::ENSG00000078618.15	0	-	52255105	52344333	0	68	2,2,2,2,2,2,2,2,2,2,2,2,2,2,2,2,2,2,2,2,2,2,2,2,2,2,2,2,2,2,2,2,2,2,2,2,2,2,2,2,2,2,2,2,2,2,2,2,2,2,2,2,2,2,2,2,2,2,2,2,2,2,2,2,2,2,2,2,	0,132,224,1097,1216,1464,1557,2142,2228,2610,2665,2941,2991,5036,5177,5387,5421,5622,5775,8813,8978,11120,11250,14378,14531,16074,16128,17358,17480,19879,19968,20845,20971,22558,22665,24599,24656,25115,25176,25257,25380,26876,26956,28630,28702,30364,30440,32062,32122,34228,34353,35851,35949,38360,38436,44581,44737,46695,46779,46933,47005,48051,48187,50790,51081,88547,88839,89226,
chr1	52385786	52456223	gencode::RAB3B::ENSG00000169213.6	0	-	52385786	52456223	0	8	2,2,2,2,2,2,2,2,	0,13201,13328,17177,17298,56773,57003,70435,
chr1	52486684	52520671	gencode::TXNDC12::ENSG00000117862.7	0	-	52486684	52520671	0	13	2,2,2,2,2,2,2,2,2,2,2,2,2,	0,2476,2562,3495,3567,6260,6336,7563,7618,13039,20522,20585,33985,
chr1	52522051	52552383	gencode::BTF3L4::ENSG00000134717.13	0	+	52522051	52552383	0	9	2,2,2,2,2,2,2,2,2,	0,3453,3522,8443,8559,26958,27162,29730,30330,
chr1	52608075	52811731	gencode::ZFYVE9::ENSG00000157077.10	0	+	52608075	52811731	0	36	2,2,2,2,2,2,2,2,2,2,2,2,2,2,2,2,2,2,2,2,2,2,2,2,2,2,2,2,2,2,2,2,2,2,2,2,	0,73963,74071,90765,90873,95082,97192,121367,121469,124249,124428,126057,126229,132058,132181,136086,136211,139255,139413,151047,151274,153489,153574,161415,161522,190362,190515,192282,192365,195366,195531,197720,197828,202362,202541,203654,
chr1	52818895	52831740	gencode::CC2D1B::ENSG00000154222.10	0	-	52818895	52831740	0	49	2,2,2,2,2,2,2,2,2,2,2,2,2,2,2,2,2,2,2,2,2,2,2,2,2,2,2,2,2,2,2,2,2,2,2,2,2,2,2,2,2,2,2,2,2,2,2,2,2,	0,292,424,1231,1382,1475,1614,1716,2172,2226,2382,2443,2545,2621,2960,3079,3158,3219,3775,3903,4300,4475,4555,4693,5105,5238,5460,5535,5801,5934,6024,6134,6233,6311,6479,6660,6848,7010,7198,7326,7748,7909,8287,8393,9376,9523,11326,11411,12843,
chr1	52839047	52869917	gencode::ORC1::ENSG00000085840.8	0	-	52839047	52869917	0	33	2,2,2,2,2,2,2,2,2,2,2,2,2,2,2,2,2,2,2,2,2,2,2,2,2,2,2,2,2,2,2,2,2,	0,1432,1522,2052,2224,8264,8386,10042,10194,10452,10562,11172,11346,11783,11887,12474,12574,15064,15262,15839,15946,20065,20428,22668,22989,24307,24488,27984,28114,28751,28850,28853,30868,
chr1	52870551	52882319	gencode::PRPF38A::ENSG00000134748.12	0	+	52870551	52882319	0	18	2,2,2,2,2,2,2,2,2,2,2,2,2,2,2,2,2,2,	0,798,960,3687,3811,6233,6321,7632,7745,8997,9112,9739,9768,9880,9980,10456,10507,11766,
chr1	52889674	53018602	gencode::ZCCHC11::ENSG00000134744.9	0	-	52889674	53018602	0	57	2,2,2,2,2,2,2,2,2,2,2,2,2,2,2,2,2,2,2,2,2,2,2,2,2,2,2,2,2,2,2,2,2,2,2,2,2,2,2,2,2,2,2,2,2,2,2,2,2,2,2,2,2,2,2,2,2,	0,1344,1505,7008,7458,11360,11463,12750,12976,14215,14333,21782,21867,21952,22002,22260,22440,22585,22665,34331,34447,37129,37221,37508,37614,37707,37767,41065,41171,44176,44265,47947,48100,50827,51533,53703,53880,57418,57633,57799,57921,64904,65033,66727,66799,69606,69660,71422,71513,73001,73181,85591,85710,92052,101558,102371,128926,
chr1	53068219	53073933	gencode::GPX7::ENSG00000116157.5	0	+	53068219	53073933	0	4	2,2,2,2,	0,4134,4398,5712,
chr1	53099347	53122461	gencode::FAM159A::ENSG00000182183.10	0	+	53099347	53122461	0	4	2,2,2,2,	0,9185,9327,23112,
chr1	53153840	53163892	gencode::SELRC1::ENSG00000162377.4	0	-	53153840	53163892	0	4	2,2,2,2,	0,4556,4699,10050,
chr1	53192355	53287110	gencode::ZYG11B::ENSG00000162378.8	0	+	53192355	53287110	0	28	2,2,2,2,2,2,2,2,2,2,2,2,2,2,2,2,2,2,2,2,2,2,2,2,2,2,2,2,	0,29772,29940,44334,45091,53167,53310,58191,58370,63317,63384,69606,69708,70048,70101,75133,75297,75406,75456,78785,78841,86850,87050,87174,87229,89846,89946,94753,
chr1	53308645	53358453	gencode::ZYG11A::ENSG00000203995.5	0	+	53308645	53358453	0	26	2,2,2,2,2,2,2,2,2,2,2,2,2,2,2,2,2,2,2,2,2,2,2,2,2,2,	0,11489,11657,14022,14776,17755,17898,21005,21184,23527,23594,24563,24665,24751,24804,34706,34870,34949,34996,38495,38692,42857,42921,43980,44080,49806,
chr1	53362269	53392780	gencode::ECHDC2::ENSG00000121310.12	0	-	53362269	53392780	0	23	2,2,2,2,2,2,2,2,2,2,2,2,2,2,2,2,2,2,2,2,2,2,2,	0,837,887,2574,2627,8046,8236,8434,8493,10014,11268,11357,14966,15056,15123,15193,17295,17498,18531,18695,24953,25322,30509,
chr1	53393137	53516280	gencode::SCP2::ENSG00000116171.12	0	+	53393137	53516280	0	31	2,2,2,2,2,2,2,2,2,2,2,2,2,2,2,2,2,2,2,2,2,2,2,2,2,2,2,2,2,2,2,	0,14328,14388,20541,20615,23287,23421,27272,27339,34035,34164,47301,47367,49215,49304,50749,50902,52928,53078,60561,60671,65790,87422,87578,100501,100606,111449,111581,120390,120472,123141,
chr1	53527980	53550184	gencode::PODN::ENSG00000174348.9	0	+	53527980	53550184	0	24	2,2,2,2,2,2,2,2,2,2,2,2,2,2,2,2,2,2,2,2,2,2,2,2,	0,1059,1251,4501,4559,7490,7859,9224,9320,12295,12362,13551,13663,14879,15038,15374,15492,16054,16714,18417,18568,19670,19880,22202,
chr1	53553899	53607986	gencode::SLC1A7::ENSG00000162383.7	0	-	53553899	53607986	0	21	2,2,2,2,2,2,2,2,2,2,2,2,2,2,2,2,2,2,2,2,2,	0,647,752,1570,1707,2382,2579,4324,4560,5231,5333,15116,15341,17502,17547,20407,26528,26746,46120,46202,54085,
chr1	53662767	53678935	gencode::CPT2::ENSG00000157184.5	0	+	53662767	53678935	0	8	2,2,2,2,2,2,2,2,	0,3621,3704,5225,5334,12917,14224,16166,
chr1	53680408	53686241	gencode::C1orf123::ENSG00000162384.9	0	-	53680408	53686241	0	14	2,2,2,2,2,2,2,2,2,2,2,2,2,2,	0,1252,1320,2043,2123,3433,3467,3675,3759,4128,4187,5522,5608,5831,
chr1	53692816	53704032	gencode::MAGOH::ENSG00000162385.6	0	-	53692816	53704032	0	8	2,2,2,2,2,2,2,2,	0,1725,1810,6395,6508,8430,8491,11214,
chr1	53712728	53793460	gencode::LRP8::ENSG00000157193.10	0	-	53712728	53793460	0	37	2,2,2,2,2,2,2,2,2,2,2,2,2,2,2,2,2,2,2,2,2,2,2,2,2,2,2,2,2,2,2,2,2,2,2,2,2,	0,2321,2500,3631,3806,8058,8129,10181,10408,11260,11415,13405,13549,15009,15151,15387,15508,17110,17340,19414,19591,23969,24097,24168,24290,28572,28697,29633,30022,33528,33659,42508,42633,79814,79936,80199,80730,
chr1	53925703	53932267	gencode::DMRTB1::ENSG00000143006.7	0	+	53925703	53932267	0	6	2,2,2,2,2,2,	0,1440,1615,4604,4817,6562,
chr1	53972449	54199576	gencode::GLIS1::ENSG00000174332.3	0	-	53972449	54199576	0	18	2,2,2,2,2,2,2,2,2,2,2,2,2,2,2,2,2,2,	0,2341,2511,3070,3251,7846,8005,13855,13990,17998,18111,23012,23176,87329,88214,93322,93502,227125,
chr1	54233706	54303877	gencode::NDC1::ENSG00000058804.10	0	-	54233706	54303877	0	34	2,2,2,2,2,2,2,2,2,2,2,2,2,2,2,2,2,2,2,2,2,2,2,2,2,2,2,2,2,2,2,2,2,2,	0,4293,4456,19122,19225,21097,21163,25193,25246,28653,28771,28863,29111,32657,32815,35892,35976,38389,38484,39620,39758,41659,41713,50935,51046,57762,57903,59963,60140,64454,64558,67464,67587,70169,
chr1	54317943	54356223	gencode::YIPF1::ENSG00000058799.9	0	-	54317943	54356223	0	22	2,2,2,2,2,2,2,2,2,2,2,2,2,2,2,2,2,2,2,2,2,2,	0,2781,7783,7883,13927,14112,14485,14654,19099,19218,26042,26132,26369,26452,30840,31006,36634,36716,36971,37193,37440,38278,
chr1	54360220	54375603	gencode::DIO1::ENSG00000211452.6	0	+	54360220	54375603	0	6	2,2,2,2,2,2,	0,10116,10262,11545,11747,15381,
chr1	54382789	54411227	gencode::HSPB11::ENSG00000081870.7	0	-	54382789	54411227	0	9	2,2,2,2,2,2,2,2,2,	0,4651,6831,11253,11324,13029,22866,22981,28436,
chr1	54412222	54433337	gencode::LRRC42::ENSG00000116212.10	0	+	54412222	54433337	0	16	2,2,2,2,2,2,2,2,2,2,2,2,2,2,2,2,	0,1236,1272,5434,5923,11597,11731,13804,13925,15482,15573,15744,15860,19744,19831,21113,
chr1	54474803	54483764	gencode::LDLRAD1::ENSG00000203985.6	0	-	54474803	54483764	0	10	2,2,2,2,2,2,2,2,2,2,	0,1149,1280,3010,3150,5103,5234,8243,8297,8959,
chr1	54497978	54519028	gencode::TMEM59::ENSG00000116209.7	0	-	54497978	54519028	0	14	2,2,2,2,2,2,2,2,2,2,2,2,2,2,	0,4302,4413,8448,8532,9416,9500,11065,11220,13481,14959,15067,20692,21048,
chr1	54519431	54561957	gencode::TCEANC2::ENSG00000116205.6	0	+	54519431	54561957	0	7	2,2,2,2,2,2,2,	0,766,14995,15139,34836,35032,42524,
chr1	54605779	54618516	gencode::CDCP2::ENSG00000157211.10	0	-	54605779	54618516	0	6	2,2,2,2,2,2,	0,989,1327,4357,4707,12735,
chr1	54640495	54665648	gencode::CYB5RL::ENSG00000215883.5	0	-	54640495	54665648	0	15	2,2,2,2,2,2,2,2,2,2,2,2,2,2,2,	0,4324,4530,9336,9443,11356,11464,12827,12917,16074,20594,20893,21544,21669,25151,
chr1	54666262	54690797	gencode::MRPL37::ENSG00000116221.11	0	+	54666262	54690797	0	13	2,2,2,2,2,2,2,2,2,2,2,2,2,	0,4426,4612,4703,4821,9354,9542,11909,12069,15549,15755,17580,24533,
chr1	54692833	54871625	gencode::SSBP3::ENSG00000157216.11	0	-	54692833	54871625	0	35	2,2,2,2,2,2,2,2,2,2,2,2,2,2,2,2,2,2,2,2,2,2,2,2,2,2,2,2,2,2,2,2,2,2,2,	0,1092,1196,1286,1317,1585,1666,11966,12039,13742,13799,14311,14349,15001,15052,16072,16139,24453,24532,24631,24700,29964,30026,30906,30989,54275,54367,174698,174785,177413,177477,177695,177770,178286,178790,
chr1	55014015	55100360	gencode::ACOT11::ENSG00000162390.13	0	+	55014015	55100360	0	33	2,2,2,2,2,2,2,2,2,2,2,2,2,2,2,2,2,2,2,2,2,2,2,2,2,2,2,2,2,2,2,2,2,	0,36310,36520,37490,37562,44201,44264,45596,45697,46211,46349,48914,49073,50951,51073,52924,53071,54324,54382,55526,55595,56001,56087,56731,56867,58789,58923,59597,59726,60612,82389,82544,86343,
chr1	55075614	55088950	gencode::FAM151A::ENSG00000162391.7	0	-	55075614	55088950	0	14	2,2,2,2,2,2,2,2,2,2,2,2,2,2,	0,468,614,1662,1804,2542,2769,4756,4918,6076,6231,9920,10066,13334,
chr1	55107641	55175618	gencode::MROH7::ENSG00000184313.15	0	+	55107641	55175618	0	49	2,2,2,2,2,2,2,2,2,2,2,2,2,2,2,2,2,2,2,2,2,2,2,2,2,2,2,2,2,2,2,2,2,2,2,2,2,2,2,2,2,2,2,2,2,2,2,2,2,	0,9978,10015,10882,12189,23196,23272,26883,26969,28526,28608,28829,28961,31120,31218,31730,31837,32045,32183,36771,36886,37292,37471,37920,38077,40685,40826,44287,44480,50453,50593,53405,53522,55682,55722,58098,58350,58493,59172,59354,60119,60277,60652,60777,64464,64569,67043,67108,67975,
chr1	55181692	55207083	gencode::TTC4::ENSG00000243725.2	0	+	55181692	55207083	0	18	2,2,2,2,2,2,2,2,2,2,2,2,2,2,2,2,2,2,	0,578,698,1470,1634,5141,5221,6653,6780,12324,12413,15464,15681,17607,17691,21560,21645,25389,
chr1	55224863	55230133	gencode::PARS2::ENSG00000162396.5	0	-	55224863	55230133	0	2	2,2,	0,5268,
chr1	55247452	55266269	gencode::TTC22::ENSG00000006555.6	0	-	55247452	55266269	0	13	2,2,2,2,2,2,2,2,2,2,2,2,2,	0,543,698,3865,4201,4365,5175,5296,5929,6047,6260,6318,18815,
chr1	55271893	55307473	gencode::C1orf177::ENSG00000162398.7	0	+	55271893	55307473	0	20	2,2,2,2,2,2,2,2,2,2,2,2,2,2,2,2,2,2,2,2,	0,773,863,1303,1470,1666,1791,5571,5711,5823,5969,7591,7755,8691,8819,10766,10902,35393,35482,35578,
chr1	55318059	55352561	gencode::DHCR24::ENSG00000116133.7	0	-	55318059	55352561	0	17	2,2,2,2,2,2,2,2,2,2,2,2,2,2,2,2,2,	0,1045,1226,1648,1848,12914,13060,18961,19227,22704,22825,23553,23661,31229,31387,34229,34500,
chr1	55446753	55457508	gencode::TMEM61::ENSG00000143001.4	0	+	55446753	55457508	0	4	2,2,2,2,	0,5014,5366,10753,
chr1	55465036	55473886	gencode::BSND::ENSG00000162399.6	0	+	55465036	55473886	0	6	2,2,2,2,2,2,	0,5656,5753,7631,7909,8848,
chr1	55505717	55529041	gencode::PCSK9::ENSG00000169174.9	0	+	55505717	55529041	0	25	2,2,2,2,2,2,2,2,2,2,2,2,2,2,2,2,2,2,2,2,2,2,2,2,2,	0,359,3796,3990,6476,6602,11145,11409,12231,12367,12603,12747,15946,16145,17284,17470,17989,18165,18452,18603,19439,19619,21328,21512,23322,
chr1	55534780	55680462	gencode::USP24::ENSG00000162402.8	0	-	55534780	55680462	0	134	2,2,2,2,2,2,2,2,2,2,2,2,2,2,2,2,2,2,2,2,2,2,2,2,2,2,2,2,2,2,2,2,2,2,2,2,2,2,2,2,2,2,2,2,2,2,2,2,2,2,2,2,2,2,2,2,2,2,2,2,2,2,2,2,2,2,2,2,2,2,2,2,2,2,2,2,2,2,2,2,2,2,2,2,2,2,2,2,2,2,2,2,2,2,2,2,2,2,2,2,2,2,2,2,2,2,2,2,2,2,2,2,2,2,2,2,2,2,2,2,2,2,2,2,2,2,2,2,2,2,2,2,2,2,	0,2704,2817,3207,3296,3676,3754,4718,4799,6347,6416,8125,8193,9428,9544,10428,10552,12212,12317,14162,14257,14662,14781,16832,16931,20517,20633,22913,23019,23711,23809,24827,24980,26145,26289,27388,27515,27842,28065,28488,28610,28833,28977,29366,29451,30661,30762,31729,31857,32474,32596,34766,34913,37036,37156,38129,38323,41075,41139,51486,51649,52326,52399,54337,54495,55359,55521,56210,56441,565…
chr1	56962348	57044550	gencode::PPAP2B::ENSG00000162407.8	0	-	56962348	57044550	0	10	2,2,2,2,2,2,2,2,2,2,	0,15297,15476,27144,27204,27598,27878,40276,40436,82200,
chr1	57111154	57173147	gencode::PRKAA2::ENSG00000162409.6	0	+	57111154	57173147	0	16	2,2,2,2,2,2,2,2,2,2,2,2,2,2,2,2,	0,28897,29041,45910,46006,46874,47021,48281,48371,50451,50678,58487,58994,60608,60737,61991,
chr1	57185365	57284954	gencode::C1orf168::ENSG00000187889.8	0	-	57185365	57284954	0	38	2,2,2,2,2,2,2,2,2,2,2,2,2,2,2,2,2,2,2,2,2,2,2,2,2,2,2,2,2,2,2,2,2,2,2,2,2,2,	0,327,363,478,637,3893,3989,6802,6891,17392,17455,18930,18961,21002,21103,22466,22529,24331,24374,24457,24574,31349,31511,34144,34243,36201,36235,39021,39058,48134,48246,67480,67516,69278,69442,72361,73111,99587,
chr1	57320651	57383237	gencode::C8A::ENSG00000157131.10	0	+	57320651	57383237	0	20	2,2,2,2,2,2,2,2,2,2,2,2,2,2,2,2,2,2,2,2,	0,12628,12724,19968,20115,21081,21231,26464,26656,28500,28703,30946,31189,51686,51814,52975,53135,57422,57647,62584,
chr1	57395231	57431529	gencode::C8B::ENSG00000021852.8	0	-	57395231	57431529	0	26	2,2,2,2,2,2,2,2,2,2,2,2,2,2,2,2,2,2,2,2,2,2,2,2,2,2,	0,2249,2320,3774,3930,11288,11454,14135,14266,16260,16503,19994,20194,22487,22622,25125,25269,27208,27352,29968,30099,30459,30618,34211,34435,36296,
chr1	57463801	58715911	gencode::DAB1::ENSG00000173406.11	0	-	57463801	58715911	0	36	2,2,2,2,2,2,2,2,2,2,2,2,2,2,2,2,2,2,2,2,2,2,2,2,2,2,2,2,2,2,2,2,2,2,2,2,	0,12549,12662,13014,13144,16752,17303,25400,25511,27850,27915,35255,35305,35392,35445,64753,64815,71229,71297,72933,73391,73513,74152,74286,138412,138513,147159,147301,292832,293037,425798,651460,651536,885867,886033,1252108,
chr1	58939640	59012374	gencode::OMA1::ENSG00000162600.7	0	-	58939640	59012374	0	17	2,2,2,2,2,2,2,2,2,2,2,2,2,2,2,2,2,	0,7206,32089,32241,53290,53367,56630,56761,59982,60092,60187,60363,62542,62773,64824,65342,72732,
chr1	59125827	59165656	gencode::MYSM1::ENSG00000162601.5	0	-	59125827	59165656	0	38	2,2,2,2,2,2,2,2,2,2,2,2,2,2,2,2,2,2,2,2,2,2,2,2,2,2,2,2,2,2,2,2,2,2,2,2,2,2,	0,1012,1072,1248,1356,5341,5476,6880,7071,7689,7766,8474,8527,8826,8883,11712,11803,13415,13495,15319,15425,16768,16901,21627,22390,24995,25096,28880,28961,30068,30094,30182,30262,32703,32776,34971,35052,39827,
chr1	59762822	60228174	gencode::FGGY::ENSG00000172456.12	0	+	59762822	60228174	0	34	2,2,2,2,2,2,2,2,2,2,2,2,2,2,2,2,2,2,2,2,2,2,2,2,2,2,2,2,2,2,2,2,2,2,	0,13026,24383,24600,42805,42919,49094,49248,81596,81687,159808,159926,215158,215289,256807,256971,257077,310650,310760,328835,328899,341075,341225,344127,344201,363066,363143,370130,370253,376886,376983,460778,460842,465350,
chr1	60280852	60338466	gencode::HOOK1::ENSG00000134709.6	0	+	60280852	60338466	0	43	2,2,2,2,2,2,2,2,2,2,2,2,2,2,2,2,2,2,2,2,2,2,2,2,2,2,2,2,2,2,2,2,2,2,2,2,2,2,2,2,2,2,2,	0,1538,6675,6763,13597,13672,16980,17033,18222,18357,20162,20232,21690,21755,25125,25211,28249,28418,31862,32005,33132,33336,33890,34003,43245,43335,43802,43865,45005,45148,47601,47697,49449,49486,49980,50065,50689,50792,53067,53171,55859,55930,57612,
chr1	60359501	60392208	gencode::CYP2J2::ENSG00000134716.5	0	-	60359501	60392208	0	16	2,2,2,2,2,2,2,2,2,2,2,2,2,2,2,2,	0,7133,7274,11039,11229,13954,14098,15952,16131,17776,17939,18330,18482,22106,22271,32705,
chr1	60456505	60539361	gencode::C1orf87::ENSG00000162598.9	0	-	60456505	60539361	0	23	2,2,2,2,2,2,2,2,2,2,2,2,2,2,2,2,2,2,2,2,2,2,2,	0,6773,6983,10241,10323,17812,19556,19623,34565,34665,42640,42808,47156,47274,49081,49347,50155,50298,64368,64605,81701,81837,82854,
chr1	61331138	61920974	gencode::NFIA::ENSG00000162599.11	0	+	61331138	61920974	0	23	2,2,2,2,2,2,2,2,2,2,2,2,2,2,2,2,2,2,2,2,2,2,2,	0,212162,216581,217292,217352,222680,223214,412051,412119,467043,467120,486981,487101,493678,493808,517768,517899,538816,541093,541261,560996,561090,589834,
chr1	62147022	62190626	gencode::TM2D1::ENSG00000162604.8	0	-	62147022	62190626	0	13	2,2,2,2,2,2,2,2,2,2,2,2,2,	0,2064,2196,13344,13420,18924,19581,19675,27976,28087,42360,42436,43602,
chr1	62208227	62626579	gencode::INADL::ENSG00000132849.14	0	+	62208227	62626579	0	86	2,2,2,2,2,2,2,2,2,2,2,2,2,2,2,2,2,2,2,2,2,2,2,2,2,2,2,2,2,2,2,2,2,2,2,2,2,2,2,2,2,2,2,2,2,2,2,2,2,2,2,2,2,2,2,2,2,2,2,2,2,2,2,2,2,2,2,2,2,2,2,2,2,2,2,2,2,2,2,2,2,2,2,2,2,2,	0,20300,20359,20455,20624,23721,23918,26725,26867,28873,29071,32648,32779,45196,45417,48790,48892,52909,53003,54729,54873,59065,59214,62890,62969,65916,65975,80387,80524,84864,85028,91096,91230,113472,113684,118993,119112,121680,122078,132685,132811,141679,141853,157025,157099,158724,158904,165814,165927,172029,172109,185172,185274,209856,230885,247610,247809,275298,275392,295419,295494,308408,30…
chr1	62660593	62675454	gencode::L1TD1::ENSG00000240563.1	0	+	62660593	62675454	0	6	2,2,2,2,2,2,	0,1511,1607,11595,12715,14859,
chr1	62704053	62784776	gencode::KANK4::ENSG00000132854.14	0	-	62704053	62784776	0	18	2,2,2,2,2,2,2,2,2,2,2,2,2,2,2,2,2,2,	0,9088,9291,14683,14828,24708,24930,28348,28438,29903,30124,33094,33208,34820,36706,43165,43253,80721,
chr1	62902233	62915916	gencode::USP1::ENSG00000162607.8	0	+	62902233	62915916	0	17	2,2,2,2,2,2,2,2,2,2,2,2,2,2,2,2,2,	0,838,3234,3475,4923,5046,5630,5737,6594,6757,8173,8867,10776,10949,11900,12104,13681,
chr1	62921127	63153897	gencode::DOCK7::ENSG00000116641.11	0	-	62921127	63153897	0	99	2,2,2,2,2,2,2,2,2,2,2,2,2,2,2,2,2,2,2,2,2,2,2,2,2,2,2,2,2,2,2,2,2,2,2,2,2,2,2,2,2,2,2,2,2,2,2,2,2,2,2,2,2,2,2,2,2,2,2,2,2,2,2,2,2,2,2,2,2,2,2,2,2,2,2,2,2,2,2,2,2,2,2,2,2,2,2,2,2,2,2,2,2,2,2,2,2,2,2,	0,2079,2249,18523,18632,19749,19895,20248,20487,20608,20700,22241,22378,31939,31956,33475,33609,37245,37391,38816,39011,40122,40225,40880,41041,49171,49326,50223,50360,52503,52602,55118,55217,57985,58150,58257,58442,72692,72849,73818,73990,80034,80176,82432,82605,84086,84202,84293,84436,87149,87247,88197,88289,89488,89583,97273,97445,100366,100533,103530,103764,106158,106247,121803,121907,123369,…
chr1	63063732	63070303	gencode::ANGPTL3::ENSG00000132855.4	0	+	63063732	63070303	0	12	2,2,2,2,2,2,2,2,2,2,2,2,	0,632,745,3018,3135,3705,3821,4221,4319,5905,6174,6569,
chr1	63249896	63329662	gencode::ATG4C::ENSG00000125703.10	0	+	63249896	63329662	0	21	2,2,2,2,2,2,2,2,2,2,2,2,2,2,2,2,2,2,2,2,2,	0,48,19491,19637,20944,21030,32347,32583,34777,35110,36911,36984,44812,44951,49810,49891,50548,50627,57200,57322,79764,
chr1	63833358	63902493	gencode::ALG6::ENSG00000088035.11	0	+	63833358	63902493	0	28	2,2,2,2,2,2,2,2,2,2,2,2,2,2,2,2,2,2,2,2,2,2,2,2,2,2,2,2,	0,3081,3372,28823,28910,34564,34656,36763,36854,38627,38712,39372,39439,43450,43644,44236,44374,46371,46459,48183,48270,51680,51753,61043,61114,61238,61439,69133,
chr1	63906774	63988799	gencode::ITGB3BP::ENSG00000142856.12	0	-	63906774	63988799	0	19	2,2,2,2,2,2,2,2,2,2,2,2,2,2,2,2,2,2,2,	0,5700,5753,6511,12812,12871,13274,13370,13784,13865,37658,37730,48977,49115,67422,67467,68959,69078,82023,
chr1	63989305	64038112	gencode::EFCAB7::ENSG00000203965.8	0	+	63989305	64038112	0	26	2,2,2,2,2,2,2,2,2,2,2,2,2,2,2,2,2,2,2,2,2,2,2,2,2,2,	0,1935,2125,8183,8397,9033,9122,9817,10015,10458,10582,22279,22423,28088,28200,31721,31881,33477,33613,38072,38223,44673,44885,47384,47494,48805,
chr1	64014803	64015159	gencode::DLEU2L::ENSG00000116652.5	0	+	64014803	64015159	0	4	2,2,2,2,	0,93,241,354,
chr1	64059405	64125256	gencode::PGM1::ENSG00000079739.11	0	+	64059405	64125256	0	22	2,2,2,2,2,2,2,2,2,2,2,2,2,2,2,2,2,2,2,2,2,2,	0,410,30026,35688,35853,36205,36354,37920,38048,41092,41285,42497,42654,44948,45066,54780,54918,57932,58118,60595,60732,65849,
chr1	64240179	64643110	gencode::ROR1::ENSG00000185483.7	0	+	64240179	64643110	0	16	2,2,2,2,2,2,2,2,2,2,2,2,2,2,2,2,	0,234795,234869,275181,275471,276176,276209,350160,362870,363000,365610,365930,367906,384482,384696,402929,
chr1	64669799	64709812	gencode::UBE2U::ENSG00000177414.9	0	+	64669799	64709812	0	16	2,2,2,2,2,2,2,2,2,2,2,2,2,2,2,2,	0,1520,1604,2645,2740,6623,6723,10696,10816,16740,16791,28442,28533,37533,37617,40011,
chr1	64936625	65157005	gencode::CACHD1::ENSG00000158966.9	0	+	64936625	65157005	0	52	2,2,2,2,2,2,2,2,2,2,2,2,2,2,2,2,2,2,2,2,2,2,2,2,2,2,2,2,2,2,2,2,2,2,2,2,2,2,2,2,2,2,2,2,2,2,2,2,2,2,2,2,	0,79649,79714,111211,111362,131861,131970,158410,158539,161654,161801,163099,163318,170875,171027,176856,177092,181216,181368,182813,182939,183741,183861,187760,187931,192750,192895,193553,193737,195112,195225,200619,200744,202213,202315,202403,202522,204456,204619,204952,205041,205950,206069,207214,207368,208650,208814,210313,210393,211060,211164,220378,
chr1	65211104	65296521	gencode::RAVER2::ENSG00000162437.10	0	+	65211104	65296521	0	22	2,2,2,2,2,2,2,2,2,2,2,2,2,2,2,2,2,2,2,2,2,2,	0,23232,23301,32199,32671,35956,36150,43964,44093,57552,57640,59310,59417,59567,59684,61782,62053,67314,67428,69280,69419,85415,
chr1	65300340	65432015	gencode::JAK1::ENSG00000162434.7	0	-	65300340	65432015	0	48	2,2,2,2,2,2,2,2,2,2,2,2,2,2,2,2,2,2,2,2,2,2,2,2,2,2,2,2,2,2,2,2,2,2,2,2,2,2,2,2,2,2,2,2,2,2,2,2,	0,736,849,1438,1558,3272,3447,3805,3932,4943,5138,6585,6682,6791,6944,9404,9558,10094,10232,10853,10983,11989,12079,12872,13018,16144,16253,20849,21041,22996,23122,25445,25605,30127,30315,32206,32551,34651,34817,38710,38866,44365,44491,48617,48818,51599,51684,131673,
chr1	65613348	65691745	gencode::AK4::ENSG00000162433.10	0	+	65613348	65691745	0	12	2,2,2,2,2,2,2,2,2,2,2,2,	0,98,392,610,887,43042,43164,71086,71261,77084,77205,78395,
chr1	65730615	65878606	gencode::DNAJC6::ENSG00000116675.11	0	+	65730615	65878606	0	39	2,2,2,2,2,2,2,2,2,2,2,2,2,2,2,2,2,2,2,2,2,2,2,2,2,2,2,2,2,2,2,2,2,2,2,2,2,2,2,	0,45006,80676,80791,99700,99853,100950,101002,101113,101264,114467,114592,119258,119394,120777,120974,121877,121997,123401,123483,124321,124517,124612,124695,127496,127933,129963,130100,133878,133949,136826,136948,140935,141201,143706,143851,146315,146494,147989,
chr1	65886423	66101873	gencode::LEPR::ENSG00000116678.14	0	+	65886423	66101873	0	41	2,2,2,2,2,2,2,2,2,2,2,2,2,2,2,2,2,2,2,2,2,2,2,2,2,2,2,2,2,2,2,2,2,2,2,2,2,2,2,2,2,	0,4560,4638,144803,144865,149730,150062,151583,151709,171914,172125,175705,175853,177917,178064,180649,180942,181100,181220,184295,184497,188010,188161,189204,189366,189471,189556,195265,195484,197221,197406,199185,199283,200610,200718,202163,202241,205380,209459,212409,215448,
chr1	65886423	65897485	gencode::LEPROT::ENSG00000213625.4	0	+	65886423	65897485	0	6	2,2,2,2,2,2,	0,4560,4638,9119,9308,11060,
chr1	66258313	66837995	gencode::PDE4B::ENSG00000184588.13	0	+	66258313	66837995	0	33	2,2,2,2,2,2,2,2,2,2,2,2,2,2,2,2,2,2,2,2,2,2,2,2,2,2,2,2,2,2,2,2,2,	0,120612,120726,125964,126205,200512,454827,455024,465014,465053,465160,465233,473405,473457,539990,562264,562894,562990,568982,569163,570535,570636,570774,570941,573034,573136,575063,575220,575310,575435,576154,576339,579680,
chr1	66999090	67208755	gencode::SGIP1::ENSG00000118473.17	0	+	66999090	67208755	0	56	2,2,2,2,2,2,2,2,2,2,2,2,2,2,2,2,2,2,2,2,2,2,2,2,2,2,2,2,2,2,2,2,2,2,2,2,2,2,2,2,2,2,2,2,2,2,2,2,2,2,2,2,2,2,2,2,	0,265,836,961,92437,92503,99660,99687,100670,100756,102534,102608,106367,106426,109400,109457,110134,110312,127103,127117,134120,134134,137585,137612,138534,138588,139871,139959,143594,143689,146268,146345,148459,148962,150697,150780,155738,155868,156780,156909,161029,161097,162086,185884,185998,195854,196012,200338,200473,205925,206130,207248,207315,207862,208029,209663,
chr1	67132650	67142658	gencode::AL139147.1::ENSG00000248458.2	0	-	67132650	67142658	0	2	2,2,	0,10006,
chr1	67218267	67242933	gencode::TCTEX1D1::ENSG00000152760.5	0	+	67218267	67242933	0	8	2,2,2,2,2,2,2,2,	0,2069,2193,17800,17894,23692,23819,24664,
chr1	67263928	67266729	gencode::INSL5::ENSG00000172410.4	0	-	67263928	67266729	0	2	2,2,	0,2799,
chr1	67279863	67390344	gencode::WDR78::ENSG00000152763.12	0	-	67279863	67390344	0	30	2,2,2,2,2,2,2,2,2,2,2,2,2,2,2,2,2,2,2,2,2,2,2,2,2,2,2,2,2,2,	0,8178,8337,12637,12866,13629,13730,19402,19526,19808,19968,21443,21597,23616,26286,26491,33301,33498,47964,48122,57329,60598,60757,76971,77086,79046,79233,91195,92738,110479,
chr1	67390778	67452085	gencode::MIER1::ENSG00000198160.10	0	+	67390778	67452085	0	30	2,2,2,2,2,2,2,2,2,2,2,2,2,2,2,2,2,2,2,2,2,2,2,2,2,2,2,2,2,2,	0,1044,1147,3789,3792,3868,5305,14930,14957,21052,32961,33125,33753,33888,34581,34648,37990,38065,45710,45864,46557,46641,47799,47896,51497,51627,56681,56823,59474,61305,
chr1	67470131	67519493	gencode::SLC35D1::ENSG00000116704.6	0	-	67470131	67519493	0	23	2,2,2,2,2,2,2,2,2,2,2,2,2,2,2,2,2,2,2,2,2,2,2,	0,3999,4634,4719,15918,15999,17084,17154,37785,37880,42814,42919,45331,45402,45982,46056,47561,47631,48320,48409,48505,48541,49360,
chr1	67559287	67697528	gencode::C1orf141::ENSG00000203963.7	0	-	67559287	67697528	0	15	2,2,2,2,2,2,2,2,2,2,2,2,2,2,2,	0,1628,1817,2645,2717,21745,21860,32145,32305,33559,33653,37535,37623,41323,138239,
chr1	67632224	67724160	gencode::IL23R::ENSG00000162594.10	0	+	67632224	67724160	0	21	2,2,2,2,2,2,2,2,2,2,2,2,2,2,2,2,2,2,2,2,2,	0,1548,1649,2798,3097,16292,16418,34193,34356,40366,40514,41157,53030,53189,70169,70261,73635,73740,89293,89386,91934,
chr1	67773650	67861229	gencode::IL12RB2::ENSG00000081985.6	0	+	67773650	67861229	0	32	2,2,2,2,2,2,2,2,2,2,2,2,2,2,2,2,2,2,2,2,2,2,2,2,2,2,2,2,2,2,2,2,	0,5943,6033,12363,12477,13632,13922,18765,18882,20230,20417,21617,21762,22690,22843,30654,30736,42900,43122,59855,60058,64466,64567,64655,64816,72016,72156,78609,78702,82059,82161,87577,
chr1	67878946	67895670	gencode::SERBP1::ENSG00000142864.10	0	-	67878946	67895670	0	14	2,2,2,2,2,2,2,2,2,2,2,2,2,2,	0,1900,2076,6743,6923,10934,11059,11622,11714,11817,11960,12869,13022,16722,
chr1	68151221	68153343	gencode::GADD45A::ENSG00000116717.7	0	+	68151221	68153343	0	6	2,2,2,2,2,2,	0,484,588,809,1049,2120,
chr1	68171259	68299026	gencode::GNG12::ENSG00000172380.5	0	-	68171259	68299026	0	6	2,2,2,2,2,2,	0,2015,2136,71879,71931,127765,
chr1	68513045	68517107	gencode::DIRAS3::ENSG00000162595.4	0	-	68513045	68517107	0	6	2,2,2,2,2,2,	0,3183,3436,3519,3635,4060,
chr1	68564436	68697876	gencode::WLS::ENSG00000116729.9	0	-	68564436	68697876	0	22	2,2,2,2,2,2,2,2,2,2,2,2,2,2,2,2,2,2,2,2,2,2,	0,27582,39024,39180,45813,45899,47113,47259,49380,49446,49807,49907,51432,51603,54761,54900,56343,56507,60367,60494,95474,133438,
chr1	68895610	68915577	gencode::RPE65::ENSG00000116745.6	0	-	68895610	68915577	0	26	2,2,2,2,2,2,2,2,2,2,2,2,2,2,2,2,2,2,2,2,2,2,2,2,2,2,	0,1135,1249,1352,1449,1541,1658,8257,8389,9012,9154,9261,9396,9631,9715,10923,11073,14601,14745,14846,14956,16780,16933,18694,18779,19965,
chr1	68942752	68962634	gencode::DEPDC1::ENSG00000024526.12	0	-	68942752	68962634	0	22	2,2,2,2,2,2,2,2,2,2,2,2,2,2,2,2,2,2,2,2,2,2,	0,715,903,2072,2251,4368,4543,4974,5828,6878,7021,9865,9915,11302,11435,11844,11965,12380,12539,17358,17626,19880,
chr1	70034324	70587462	gencode::LRRC7::ENSG00000033122.14	0	+	70034324	70587462	0	55	2,2,2,2,2,2,2,2,2,2,2,2,2,2,2,2,2,2,2,2,2,2,2,2,2,2,2,2,2,2,2,2,2,2,2,2,2,2,2,2,2,2,2,2,2,2,2,2,2,2,2,2,2,2,2,	0,109737,109837,147498,147577,191547,191752,223399,223519,257104,257185,266136,266228,269583,269642,304823,362863,362929,411735,411812,417598,417745,425917,425992,443153,443285,444330,444448,447821,447893,450075,450177,452361,452488,454482,454733,459527,459730,467477,467591,467800,467983,469469,471152,475310,475453,484382,484504,507433,507657,521083,521178,539108,539185,553136,
chr1	70611588	70671072	gencode::LRRC40::ENSG00000066557.5	0	-	70611588	70671072	0	28	2,2,2,2,2,2,2,2,2,2,2,2,2,2,2,2,2,2,2,2,2,2,2,2,2,2,2,2,	0,2579,2767,5220,5300,6525,6638,9781,9891,13422,13533,27557,27605,27714,27804,29902,30077,32943,33088,35178,35304,38877,39009,41357,41433,43184,43368,59482,
chr1	70671463	70716290	gencode::SRSF11::ENSG00000116754.9	0	+	70671463	70716290	0	29	2,2,2,2,2,2,2,2,2,2,2,2,2,2,2,2,2,2,2,2,2,2,2,2,2,2,2,2,2,	0,15829,15832,16059,22639,22775,24774,24838,25312,26076,26195,26597,28913,29008,29718,29770,31642,31772,33656,33740,38901,39035,41035,41127,44169,44267,44582,44723,44825,
chr1	70728530	70819661	gencode::ANKRD13C::ENSG00000118454.8	0	-	70728530	70819661	0	24	2,2,2,2,2,2,2,2,2,2,2,2,2,2,2,2,2,2,2,2,2,2,2,2,	0,8006,8109,11870,11971,13915,13997,29538,29702,33280,33414,37914,38061,43374,43443,50895,50943,52631,52719,62003,62110,73208,73252,91129,
chr1	70820891	70850940	gencode::HHLA3::ENSG00000197568.9	0	+	70820891	70850940	0	7	2,2,2,2,2,2,2,	0,11116,11120,11233,11329,12406,30047,
chr1	70877266	70904783	gencode::CTH::ENSG00000116761.7	0	+	70877266	70904783	0	22	2,2,2,2,2,2,2,2,2,2,2,2,2,2,2,2,2,2,2,2,2,2,	0,4370,4454,6351,6449,9980,10092,12699,12833,18208,18268,18731,18811,20497,20652,22242,22366,23539,23594,27102,27243,27515,
chr1	71318542	71512363	gencode::PTGER3::ENSG00000050628.16	0	-	71318542	71512363	0	12	2,2,2,2,2,2,2,2,2,2,2,2,	0,31224,33416,33469,100200,100901,100930,118874,121435,121529,159625,193819,
[truncated: 17,920 more rows]

## Sheet: gc19_pc.3utr.gene.bed
chr1	134900	138529	gencode::AL627309.1::ENSG00000237683.5	0	-	134900	138529	0	2	902,909,	0,2720,
[truncated: 19,345 more rows]

## Sheet: gc19_pc.5utr.gene.bed
chr1	139309	139379	gencode::AL627309.1::ENSG00000237683.5	0	-	139309	139379	0	1	70,	0,
[truncated: 19,077 more rows]

[truncated: 1 more sheets: gc19_pc.cds.gene.bed]
