# Supplementary material for: Non-coding cancer driver candidates identified with a sample- and position-specific model of the somatic mutation rate
Source: eLife journal article supplement (doi:10.7554/elife.21778), 2017-03-31
Supplement: supp [file elife-21778-supp-v2.zip › elife_poa_e21778_Supplementary_File_5.xlsx]

## Sheet: legend
General description
various expression analyses: results and data
Sheet number	Sheet name	Information
2	TCGA505_expr_results	For each of the top-25 ncdDetect candidates of each non-coding element type (promoters, splice sites, 5' UTRs or 3' UTRs), a p-value is given per cancer type, stating if there is a difference in expression levels between mutated and non-mutated samples. The sign in front of the p-value indicates the direction of expression level change. The ananlyses are based on the 505 whole genome TCGA samples
3	TCGAexome_expr_results	For each of the top-25 ncdDetect candidates of each non-coding element type (promoters, splice sites, 5' UTRs or 3' UTRs), a p-value is given per cancer type, stating if there is a difference in expression levels between mutated and non-mutated samples. The ananlyses are based on the TCGA exome samples
4	TCGA505_UDGstat_SMUG1.UNG_exp	For each of the 505 whole genome TCGA samples, the calculated value of the uracil-DNA glycosylase (UDG) statistic is provided along with expression values for the SMUG1 and UNG genes
5	TCGAexome_UDGstat_SMUG1.UNG_exp	For each of the TCGA exome samples, the calculated value of the uracil-DNA glycosylase (UDG) statistic is provided along with expression values for the SMUG1 and UNG genes
6	TCGA505_UDGstat_SMUG1.UNG_res	Various analyses of SMUG1 and UNG expression and UDG statistic for the 505 whole genome TCGA samples
7	TCGAexome_UDGstat_SMUG1.UNG_res	Various analyses of SMUG1 and UNG expression and UDG statistic for the TCGA exome samples
Column keys for sheets 2 and 3
element_type	promoter (prom), splice site (ss), 3' UTR (utr3), 5' UTR (utr5) or protein-coding exon (cds)
element_id	candidate id
cancer type	a column for each specific cancer type
fishers_pval	p-values combined across cancer types with Fisher's method
qval	q-value after correcting for multiple testing (Benjamini-Hochberg approach)
Column keys for sheet 4
sample_id	sample id for each of the 505 whole genome TCGA samples
cancer_type	cancer type
n_mut_total	number of mutations observed for each sample
UDG_statistic	the value of the calculated uracil-DNA glycosylase deficiency signature statistic
smug1_log2expression	SMUG1 gene expression values (log2 RPKM)
ung_log2expression	UNG gene expression values (log2 RPKM)
Column keys for sheet 5
sample_id	sample id for each of the TCGA exome samples
cancer_type	cancer type
n_mut_total	number of mutations observed for each sample
UDG_statistic	the value of the calculated uracil-DNA glycosylase deficiency signature statistic
smug1_log2expression	SMUG1 gene expression values (log2 RSEM)
ung_log2expression	UNG gene expression values (log2 RSEM)
TCGA505_sample	indicator that equals one if the sample is also present in the 505 whole genome TCGA sample set
Column keys for sheets 6 and 7
test_description	brief text describing the test performed (sheet 6 analyses are based on the 505 whole genome TCGA samples, and sheet 7 analyses are based on the TCGA exome samples)
cancer type	a column for each specific cancer type
fishers_pval	p-values combined across cancer types with Fisher's method

## Sheet: TCGA505_expr_results
element_type	element_id	GBM	LUAD	LUSC	BRCA	KIRC	UCEC	CRC	HNSC	THCA	BLCA	PRAD	LGG	SKCM	KICH	fishers_pval	qval
prom	gencode::ADRB3::ENSG00000188778.3	NA	NA	NA	-0.487849	-0.598038	-0.436573	0.00744458	NA	-0.797814	NA	NA	NA	0.842016	0.460753	0.297325	0.595421
prom	gencode::AL645608.2::ENSG00000269308.1	NA	NA	NA	NA	NA	NA	NA	NA	NA	NA	NA	NA	NA	NA	NA	NA
prom	gencode::ATP10D::ENSG00000145246.9	NA	0.565217	NA	NA	0.206897	-0.291043	0.562595	-0.962963	NA	0.21535	NA	NA	0.159317	NA	0.396766	0.659454
prom	gencode::BRDT::ENSG00000137948.14	NA	-0.224946	0.269725	NA	NA	NA	0.018971	NA	NA	-0.0593561	NA	NA	0.013344	NA	0.00193184	0.0631068
prom	gencode::C21orf119::ENSG00000256073.2	NA	NA	-0.935602	0.51598	NA	NA	NA	NA	NA	NA	NA	NA	-0.0790031	NA	0.366194	0.659454
prom	gencode::C6orf62::ENSG00000112308.8	NA	0.0434783	-0.405933	0.480538	NA	0.6679	NA	NA	-0.941176	NA	NA	NA	0.073248	NA	0.205555	0.570777
prom	gencode::CCL26::ENSG00000006606.4	-0.0740741	-0.821201	-0.984637	-1	NA	-0.270159	-0.295984	-0.666667	NA	0.102586	NA	NA	0.252048	-0.560179	0.460246	0.693909
prom	gencode::FRG2B::ENSG00000225899.3	0.00444719	-0.263815	-0.576315	-0.802709	NA	-0.753312	-0.684821	0.279655	-0.172006	NA	-0.709815	NA	0.975488	NA	0.280744	0.595421
prom	gencode::HLA-DRB5::ENSG00000198502.5	NA	-0.720998	0.0953089	-0.290081	0.44208	0.29264	-0.794425	-0.0307806	-0.918807	-0.0116343	NA	NA	0.0309065	0.12544	0.0122772	0.160446
prom	gencode::KDM5A::ENSG00000073614.7	NA	NA	NA	NA	NA	NA	-0.199645	NA	NA	NA	NA	NA	-0.356057	0.4	0.309862	0.595421
prom	gencode::KLHL11::ENSG00000178502.5	NA	NA	NA	NA	NA	-0.538221	0.438919	NA	NA	NA	NA	NA	0.578947	0.0379504	0.230288	0.570777
prom	gencode::LRRC45::ENSG00000169683.3	NA	NA	NA	NA	NA	NA	NA	NA	NA	NA	NA	NA	0.356783	-0.8	0.643286	0.785701
prom	gencode::MUC12::ENSG00000205277.5	0.889534	-0.746389	-0.868687	-0.97475	NA	-0.0543759	-0.752613	-0.503296	NA	-1	0.4	0.555556	-0.724794	NA	0.944491	0.984682
prom	gencode::MUC3A::ENSG00000169894.13	NA	-1	-0.244444	-0.200852	0.206897	-0.210086	-0.809524	NA	NA	NA	0.0822484	NA	0.191713	1	0.278324	0.595421
prom	gencode::NME8::ENSG00000086288.7	0.940773	NA	-0.554497	NA	NA	-0.0668355	0.531238	NA	-0.475364	NA	NA	NA	-0.445327	NA	0.52183	0.730563
prom	gencode::OR7G3::ENSG00000170920.2	NA	-1	-0.753072	-0.671188	-0.773102	NA	-0.810181	-0.755405	-1	NA	NA	NA	-0.906186	NA	0.999807	1
prom	gencode::PLEKHS1::ENSG00000148735.10	NA	-0.442292	-0.203897	-0.514765	NA	0.0969145	-0.959084	NA	-0.701149	-0.887853	NA	NA	0.0378708	NA	0.301758	0.595421
prom	gencode::PRAMEF4::ENSG00000243073.3	0.0011529	-0.699684	NA	NA	-0.673059	-0.392591	0.0172447	-0.659269	-0.83591	-0.434249	NA	NA	0.0596253	NA	0.0144001	0.160446
prom	gencode::RNF219::ENSG00000152193.7	NA	NA	0.533333	0.028097	-0.681386	0.0425532	0.549459	-0.726313	0.352941	-0.190476	NA	NA	0.678958	0.0848095	0.099642	0.375574
prom	gencode::SMUG1::ENSG00000123415.10	NA	NA	NA	0.12073	NA	NA	-0.209059	NA	NA	NA	NA	NA	-0.333242	NA	0.144617	0.472415
prom	gencode::SPATC1L::ENSG00000160284.10	NA	-0.652174	-0.682286	-0.110913	0.25332	0.12766	0.199287	-0.00124406	NA	NA	NA	NA	NA	0.294505	0.0102111	0.160446
prom	gencode::TERT::ENSG00000164362.14	0.0110306	-0.706446	-0.177782	NA	NA	NA	NA	NA	3.30017e-05	-0.809405	NA	0.00134387	-0.883013	NA	1.47498e-05	0.00144548
prom	gencode::TM4SF18::ENSG00000163762.2	NA	NA	0.203882	NA	-0.649498	NA	-0.302606	-0.888889	NA	NA	NA	NA	-1	0.666667	0.824285	0.887691
prom	gencode::TRAIP::ENSG00000183763.4	NA	-0.913043	NA	-0.488552	NA	0.723404	0.47619	NA	NA	0.277796	NA	NA	-0.830131	NA	0.878011	0.935272
prom	gencode::WDR74::ENSG00000133316.11	NA	-0.25276	0.0261156	0.426826	NA	-0.0906568	-0.373734	-0.0360283	NA	NA	NA	NA	0.256046	NA	0.0147349	0.160446
ss	gencode::ABCG8::ENSG00000143921.6	NA	NA	NA	NA	NA	NA	NA	NA	NA	NA	NA	NA	0.649406	NA	0.649406	0.785701
ss	gencode::ARL11::ENSG00000152213.3	NA	NA	NA	NA	NA	NA	-1	NA	NA	NA	NA	NA	NA	NA	1	1
ss	gencode::CDKN2A::ENSG00000147889.12	NA	NA	NA	NA	NA	NA	NA	NA	NA	NA	NA	NA	-0.517781	NA	0.517781	0.730563
ss	gencode::CLCF1::ENSG00000175505.9	NA	NA	NA	NA	NA	NA	-0.904762	NA	NA	NA	NA	NA	NA	NA	0.904762	0.953405
ss	gencode::GJA3::ENSG00000121743.3	NA	NA	NA	-0.492844	NA	NA	NA	NA	NA	NA	NA	NA	NA	NA	0.492844	0.730563
ss	gencode::ITGA11::ENSG00000137809.12	NA	-0.304348	-0.711111	-0.691404	0.62069	NA	NA	NA	NA	NA	NA	NA	NA	NA	0.783627	0.859423
ss	gencode::KLHDC10::ENSG00000128607.9	NA	NA	NA	NA	NA	0.0839087	NA	NA	NA	NA	NA	NA	NA	NA	0.0839087	0.34741
ss	gencode::MARCH1::ENSG00000145416.9	NA	NA	NA	-0.539566	NA	-0.255319	NA	NA	NA	NA	NA	NA	0.157895	NA	0.264395	0.595421
ss	gencode::NF1::ENSG00000196712.12	-0.0740741	-0.591304	-0.767677	NA	NA	NA	NA	NA	NA	NA	NA	NA	-0.157895	NA	0.233151	0.570777
ss	gencode::NPPB::ENSG00000120937.8	NA	NA	NA	NA	NA	NA	NA	NA	NA	NA	NA	NA	0.416475	NA	0.416475	0.662678
ss	gencode::OSBPL11::ENSG00000144909.7	NA	NA	NA	NA	NA	NA	0.392567	NA	NA	NA	NA	NA	NA	NA	0.392567	0.659454
ss	gencode::PAK7::ENSG00000101349.12	NA	NA	NA	NA	NA	NA	0.0358338	NA	NA	NA	NA	NA	-0.236695	NA	0.0489381	0.310185
ss	gencode::PBRM1::ENSG00000163939.14	NA	NA	NA	NA	0.768473	NA	0.392567	NA	NA	-0.285714	NA	NA	-0.105263	NA	0.309298	0.595421
ss	gencode::PGLYRP4::ENSG00000163218.10	NA	0.403748	NA	NA	NA	NA	NA	NA	NA	NA	NA	NA	NA	NA	0.403748	0.659454
ss	gencode::PTEN::ENSG00000171862.5	NA	NA	NA	-0.563682	-0.551724	NA	NA	NA	NA	NA	NA	NA	NA	NA	0.674233	0.80579
ss	gencode::SKA3::ENSG00000165480.11	NA	NA	0.205567	NA	NA	NA	NA	NA	NA	NA	NA	NA	NA	NA	0.205567	0.570777
ss	gencode::STK11::ENSG00000118046.10	NA	-0.439072	NA	NA	NA	NA	NA	NA	NA	NA	NA	NA	NA	NA	0.439072	0.672329
ss	gencode::SYNGR3::ENSG00000127561.10	NA	NA	NA	NA	NA	NA	NA	NA	NA	NA	NA	NA	-0.578947	NA	0.578947	0.758051
ss	gencode::TAS1R1::ENSG00000173662.15	NA	NA	NA	NA	NA	NA	NA	NA	NA	NA	NA	NA	-0.385609	NA	0.385609	0.659454
ss	gencode::TCN2::ENSG00000185339.4	NA	NA	NA	NA	NA	-0.0111008	NA	NA	NA	NA	NA	NA	NA	NA	0.0111008	0.160446
ss	gencode::TGFB1::ENSG00000105329.5	NA	0.521739	NA	NA	NA	NA	-0.714286	NA	NA	NA	NA	NA	NA	NA	0.740519	0.849401
ss	gencode::THTPA::ENSG00000259431.1	NA	NA	NA	NA	NA	NA	-0.761905	NA	NA	NA	NA	NA	NA	NA	0.761905	0.854369
ss	gencode::TP53::ENSG00000141510.11	-0.962963	-0.608696	-0.113131	-0.0238818	NA	NA	NA	NA	NA	NA	NA	-0.333333	-0.0526316	NA	0.0506425	0.310185
ss	gencode::VHL::ENSG00000134086.7	NA	NA	NA	NA	-1	NA	NA	NA	NA	NA	NA	NA	NA	NA	1	1
ss	gencode::XCL1::ENSG00000143184.4	NA	NA	-0.0191172	NA	NA	NA	NA	NA	NA	NA	NA	NA	NA	NA	0.0191172	0.187348
utr3	gencode::AC008964.1::ENSG00000269215.1	NA	NA	NA	NA	NA	NA	NA	NA	NA	NA	NA	NA	NA	NA	NA	NA
utr3	gencode::AC145676.2::ENSG00000249852.1	NA	-0.678619	-0.111818	NA	NA	0.475629	0.165342	-0.274775	NA	NA	NA	NA	-0.329223	NA	0.238794	0.570777
utr3	gencode::ADAM28::ENSG00000042980.8	-0.797321	-0.956522	0.476566	0.263275	NA	0.444033	0.00431437	NA	NA	-0.285714	NA	NA	0.163761	NA	0.105122	0.378198
utr3	gencode::ARMC4::ENSG00000169126.11	NA	-0.939953	0.0734492	NA	NA	NA	-0.782514	NA	NA	NA	NA	NA	-0.198247	NA	0.336164	0.633539
utr3	gencode::C1QTNF7::ENSG00000163145.8	NA	-0.330948	-0.583838	0.248162	0.590633	-0.29632	0.011401	NA	NA	0.0857143	NA	NA	-0.145187	NA	0.0384533	0.289878
utr3	gencode::C1orf61::ENSG00000125462.12	NA	-0.29162	NA	NA	NA	-0.182391	0.218979	NA	NA	NA	NA	NA	-0.377285	NA	0.210058	0.570777
utr3	gencode::C7::ENSG00000112936.14	-0.444444	NA	0.0448528	NA	NA	0.356282	-0.364703	NA	NA	NA	NA	NA	0.105798	NA	0.088625	0.34741
utr3	gencode::C9orf170::ENSG00000204446.2	NA	-0.5695	-0.194317	NA	NA	-0.0133306	0.0718072	NA	NA	NA	NA	NA	-0.623872	NA	0.0372107	0.289878
utr3	gencode::CDH12::ENSG00000154162.9	NA	NA	-0.804244	-0.214053	NA	-0.855829	0.00379345	-0.652876	NA	-0.93417	NA	NA	-0.855203	NA	0.296525	0.595421
utr3	gencode::DRD5::ENSG00000169676.4	NA	NA	NA	NA	NA	-0.581274	0.732375	NA	NA	NA	NA	NA	NA	NA	0.789266	0.859423
utr3	gencode::EDN3::ENSG00000124205.11	NA	-1	-0.255227	NA	NA	-0.561096	-0.00474447	-0.291577	NA	NA	NA	NA	-0.302801	NA	0.0783891	0.34741
utr3	gencode::ELOVL3::ENSG00000119915.4	NA	NA	-0.891467	NA	NA	NA	-1	NA	NA	-0.666667	NA	NA	0.144501	NA	0.767188	0.854369
utr3	gencode::FAHD2B::ENSG00000144199.7	NA	-0.0543829	NA	-0.0462793	NA	NA	-0.761905	-0.823641	NA	NA	NA	-0.162878	NA	NA	0.0854089	0.34741
utr3	gencode::INA::ENSG00000148798.5	NA	NA	-0.0591228	0.1488	NA	0.268101	0.00100849	NA	NA	NA	NA	NA	-1	NA	0.00387988	0.095057
utr3	gencode::LGSN::ENSG00000146166.12	-0.174778	-0.850456	-0.442308	-0.253205	NA	-0.0669112	-0.680552	-0.158849	NA	-0.172957	NA	NA	-0.0553379	NA	0.0727105	0.34741
utr3	gencode::LRTM1::ENSG00000144771.7	NA	NA	NA	NA	-0.66589	-0.243174	0.91072	-0.346769	NA	-0.464143	NA	NA	-0.596286	0.0109906	0.228684	0.570777
utr3	gencode::MUC19::ENSG00000205592.9	0.29326	0.130628	0.444144	-0.0350824	-0.435664	-0.6683	0.63013	0.13624	-0.907567	-0.777975	NA	-0.573555	0.771082	-0.791898	0.517837	0.730563
utr3	gencode::MYO5B::ENSG00000167306.14	-0.409975	-0.219666	-0.230165	-0.0587768	0.0689655	-0.136069	-0.550281	-0.0408915	NA	0.285714	0.5	0.368643	-0.905524	NA	0.0498029	0.310185
utr3	gencode::PAFAH1B2::ENSG00000168092.9	NA	-0.173913	-0.533333	-0.827395	-0.783274	0.0457074	0.000285513	0.531396	NA	-0.952381	NA	NA	-0.480797	NA	0.0292252	0.26037
utr3	gencode::PRSS3::ENSG00000010438.12	-0.889534	NA	NA	-0.43521	NA	NA	NA	NA	NA	NA	NA	NA	-0.198688	-0.8	0.694573	0.820099
utr3	gencode::PSG6::ENSG00000170848.11	NA	-0.0644922	-0.421592	-0.689339	NA	-0.761096	-0.528042	0.213776	NA	-0.604773	NA	NA	-0.826597	NA	0.580141	0.758051
utr3	gencode::SEC14L1::ENSG00000129657.10	NA	0.217391	-0.0848485	-0.673252	0.827586	-0.896122	0.120084	-0.814815	0.764706	NA	NA	NA	-0.246799	-0.380952	0.503133	0.730563
utr3	gencode::SERPINB3::ENSG00000057149.10	NA	NA	-0.755556	NA	NA	-0.26835	-0.545647	NA	NA	0.190476	NA	NA	0.294203	NA	0.426007	0.662678
utr3	gencode::SGCZ::ENSG00000185053.8	NA	-0.866566	NA	NA	NA	-0.619413	-0.423842	0.0094316	NA	NA	NA	NA	0.392751	NA	0.165918	0.508124
utr3	gencode::TBC1D22A::ENSG00000054611.9	-0.341045	0.80147	NA	0.016439	NA	0.854764	0.110508	NA	0.938416	NA	-0.5	NA	0.284495	-0.0270901	0.0833301	0.34741
utr5	gencode::C16orf59::ENSG00000162062.10	NA	NA	NA	NA	NA	NA	NA	NA	NA	NA	NA	NA	0.723524	NA	0.723524	0.844112
utr5	gencode::C19orf53::ENSG00000104979.4	NA	NA	0.0444444	NA	NA	-0.595745	NA	NA	NA	NA	NA	NA	-0.566918	NA	0.21037	0.570777
utr5	gencode::CAST::ENSG00000153113.19	NA	NA	-0.0558456	-0.120731	0.0689655	NA	0.392567	-0.814815	NA	NA	NA	NA	0.342614	NA	0.0715839	0.34741
utr5	gencode::CD1A::ENSG00000158477.6	NA	0.434783	-0.375877	0.159234	NA	-1	-0.23155	0.740741	NA	-0.380952	NA	NA	-0.447636	NA	0.571809	0.758051
utr5	gencode::CDH10::ENSG00000040731.6	NA	-0.761592	0.220739	NA	NA	-0.318511	-0.59351	NA	NA	-0.151348	NA	NA	-0.324046	NA	0.374301	0.659454
utr5	gencode::CGB5::ENSG00000189052.6	NA	-0.879183	NA	NA	NA	NA	-0.478708	0.108257	0.245053	NA	NA	NA	0.178425	NA	0.256868	0.595421
utr5	gencode::COL21A1::ENSG00000124749.12	NA	NA	NA	-0.745346	NA	NA	-0.961046	NA	NA	NA	NA	-1	0.933335	NA	0.999205	1
utr5	gencode::CRP::ENSG00000132693.8	NA	NA	NA	NA	NA	0.0605367	0.255391	NA	NA	NA	NA	NA	-0.35333	NA	0.108057	0.378198
utr5	gencode::DHRS1::ENSG00000157379.9	NA	NA	NA	NA	NA	-0.851064	0.739252	NA	NA	-0.761905	-0.00771681	0.162878	-0.774468	NA	0.223367	0.570777
utr5	gencode::DHX16::ENSG00000204560.5	-0.222222	NA	-0.977778	NA	NA	NA	NA	-0.666667	NA	NA	NA	NA	-0.281661	NA	0.602728	0.777201
utr5	gencode::ERGIC3::ENSG00000125991.14	NA	NA	NA	NA	NA	NA	NA	NA	NA	NA	NA	NA	-0.420104	NA	0.420104	0.662678
utr5	gencode::EVI2A::ENSG00000126860.7	NA	-0.0869565	NA	NA	NA	-0.831355	0.0414359	-0.814815	NA	NA	NA	NA	NA	NA	0.149831	0.473658
utr5	gencode::KIAA1737::ENSG00000198894.3	NA	-0.652174	NA	NA	NA	NA	NA	-0.0740741	NA	NA	NA	NA	-0.8671	NA	0.385623	0.659454
utr5	gencode::MALSU1::ENSG00000156928.4	NA	NA	-0.977778	NA	NA	NA	NA	NA	NA	NA	NA	NA	0.275527	NA	0.622739	0.777465
utr5	gencode::MAP1S::ENSG00000130479.6	NA	NA	NA	NA	NA	-0.93617	NA	NA	NA	NA	NA	NA	0.278793	NA	0.611581	0.777465
utr5	gencode::MRPL36::ENSG00000171421.8	NA	-0.130812	NA	NA	NA	NA	0.00488984	0.118747	NA	NA	NA	0.0539724	0.118753	NA	0.00121363	0.0594677
utr5	gencode::MTG2::ENSG00000101181.13	NA	-0.565217	-0.266667	NA	NA	NA	NA	NA	-0.411765	NA	NA	0.732026	NA	NA	0.626732	0.777465
utr5	gencode::MTRNR2L13::ENSG00000270394.1	-0.755216	0.549808	-0.535346	NA	NA	-0.758455	-0.773695	NA	NA	NA	0.086998	NA	-0.155812	NA	0.55221	0.75162
utr5	gencode::NDUFB9::ENSG00000147684.3	NA	NA	-0.133333	NA	NA	NA	NA	NA	NA	NA	NA	NA	0.599492	NA	0.281887	0.595421
utr5	gencode::PRKAG1::ENSG00000181929.7	NA	NA	NA	NA	NA	NA	NA	NA	0.176471	-0.666667	NA	NA	0.0534243	NA	0.118915	0.40185
utr5	gencode::SDHD::ENSG00000204370.4	NA	NA	NA	NA	NA	NA	NA	NA	NA	NA	NA	NA	-0.54439	NA	0.54439	0.751411
utr5	gencode::SIRPD::ENSG00000125900.8	NA	-0.677083	0.203495	NA	NA	0.0250858	0.61374	NA	NA	0.0726009	NA	NA	0.41805	NA	0.0815123	0.34741
utr5	gencode::TBC1D12::ENSG00000108239.8	NA	0.651298	NA	0.120731	NA	-0.851064	NA	NA	-0.941176	0.533333	NA	NA	NA	NA	0.745392	0.849401
utr5	gencode::TBC1D29::ENSG00000266733.1	NA	NA	-0.35906	-0.6213	NA	0.432027	-0.255074	NA	NA	0.154095	NA	0.334927	-0.50804	NA	0.399401	0.659454
utr5	gencode::WDR74::ENSG00000133316.11	-0.148148	0.467148	-0.0284365	NA	0.0131045	NA	0.725418	-0.962963	NA	-0.920128	NA	NA	NA	NA	0.0783057	0.34741

## Sheet: TCGAexome_expr_results
element_type	element_id	ACC	BLCA	BRCA	CESC	CHOL	COAD	DLBC	GBM	HNSC	KICH	KIRC	KIRP	LGG	LIHC	LUAD	LUSC	MESO	OV	PAAD	PCPG	PRAD	READ	SARC	SKCM	TGCT	THCA	THYM	UCEC	UCS	UVM	fishers_pval	qval
prom	gencode::ADRB3::ENSG00000188778.3	NA	NA	NA	NA	NA	NA	NA	NA	NA	NA	NA	NA	NA	NA	NA	NA	NA	NA	NA	NA	NA	NA	NA	NA	NA	NA	NA	NA	NA	NA	NA	NA
prom	gencode::AL645608.2::ENSG00000269308.1	NA	NA	NA	NA	NA	NA	NA	NA	NA	NA	NA	NA	NA	NA	NA	NA	NA	NA	NA	NA	NA	NA	NA	NA	NA	NA	NA	NA	NA	NA	NA	NA
prom	gencode::ATP10D::ENSG00000145246.9	NA	NA	NA	NA	NA	NA	NA	NA	NA	NA	NA	NA	NA	NA	NA	NA	NA	NA	NA	NA	NA	NA	NA	NA	NA	NA	NA	NA	NA	NA	NA	NA
prom	gencode::BRDT::ENSG00000137948.14	NA	NA	NA	NA	NA	NA	NA	NA	NA	NA	NA	NA	NA	NA	NA	NA	NA	NA	NA	NA	NA	NA	NA	NA	NA	NA	NA	NA	NA	NA	NA	NA
prom	gencode::C21orf119::ENSG00000256073.2	NA	NA	NA	NA	NA	NA	NA	NA	NA	NA	NA	NA	NA	NA	NA	NA	NA	NA	NA	NA	NA	NA	NA	NA	NA	NA	NA	NA	NA	NA	NA	NA
prom	gencode::C6orf62::ENSG00000112308.8	NA	NA	NA	NA	NA	NA	NA	NA	NA	NA	NA	NA	NA	NA	NA	NA	NA	NA	NA	NA	NA	NA	NA	NA	NA	NA	NA	NA	NA	NA	NA	NA
prom	gencode::CCL26::ENSG00000006606.4	NA	NA	0.51973	NA	NA	NA	NA	NA	NA	NA	NA	NA	NA	NA	NA	NA	NA	NA	NA	NA	NA	NA	NA	NA	NA	NA	NA	NA	NA	NA	0.51973	0.8989
prom	gencode::FRG2B::ENSG00000225899.3	NA	NA	NA	NA	NA	NA	NA	NA	0.647031	NA	NA	NA	NA	NA	NA	NA	NA	NA	NA	NA	NA	NA	NA	NA	NA	NA	NA	NA	NA	NA	0.647031	0.92721
prom	gencode::HLA-DRB5::ENSG00000198502.5	NA	NA	0.29981	NA	NA	NA	NA	NA	0.282129	NA	NA	NA	NA	0.97393	NA	NA	NA	NA	NA	NA	NA	NA	NA	NA	NA	0.172109	NA	0.162271	NA	NA	0.275205	0.746984
prom	gencode::KDM5A::ENSG00000073614.7	NA	NA	NA	NA	NA	NA	NA	NA	NA	NA	NA	NA	NA	NA	NA	NA	NA	NA	NA	NA	NA	NA	NA	NA	NA	NA	NA	NA	NA	NA	NA	NA
prom	gencode::KLHL11::ENSG00000178502.5	NA	NA	NA	NA	NA	NA	NA	NA	NA	NA	NA	NA	NA	NA	NA	NA	NA	NA	NA	NA	NA	NA	NA	NA	NA	NA	NA	NA	NA	NA	NA	NA
prom	gencode::LRRC45::ENSG00000169683.3	NA	NA	NA	NA	NA	NA	NA	NA	NA	NA	NA	NA	NA	NA	NA	NA	NA	NA	NA	NA	NA	NA	NA	NA	NA	NA	NA	NA	NA	NA	NA	NA
prom	gencode::MUC12::ENSG00000205277.5	NA	NA	NA	NA	NA	NA	NA	NA	NA	NA	NA	NA	NA	NA	NA	NA	NA	NA	NA	NA	NA	NA	NA	NA	NA	NA	NA	NA	NA	NA	NA	NA
prom	gencode::MUC3A::ENSG00000169894.13	NA	NA	NA	NA	NA	NA	NA	NA	NA	NA	NA	NA	NA	NA	NA	NA	NA	NA	NA	NA	NA	NA	NA	NA	NA	NA	NA	NA	NA	NA	NA	NA
prom	gencode::NME8::ENSG00000086288.7	NA	NA	NA	NA	NA	NA	NA	NA	NA	NA	NA	NA	NA	NA	NA	NA	NA	NA	NA	NA	NA	NA	NA	NA	NA	NA	NA	NA	NA	NA	NA	NA
prom	gencode::OR7G3::ENSG00000170920.2	NA	NA	NA	NA	NA	NA	NA	NA	NA	NA	NA	NA	NA	NA	NA	NA	NA	NA	NA	NA	NA	NA	NA	NA	NA	NA	NA	NA	NA	NA	NA	NA
prom	gencode::PLEKHS1::ENSG00000148735.10	NA	NA	NA	NA	NA	NA	NA	NA	NA	NA	NA	NA	NA	NA	NA	NA	NA	NA	NA	NA	NA	NA	NA	NA	NA	NA	NA	NA	NA	NA	NA	NA
prom	gencode::PRAMEF4::ENSG00000243073.3	NA	NA	NA	NA	NA	NA	NA	NA	NA	NA	NA	NA	NA	NA	NA	NA	NA	NA	NA	NA	NA	NA	NA	NA	NA	NA	NA	NA	NA	NA	NA	NA
prom	gencode::RNF219::ENSG00000152193.7	NA	NA	0.268867	NA	NA	NA	NA	NA	NA	NA	NA	NA	NA	NA	NA	NA	NA	NA	NA	NA	NA	NA	NA	NA	NA	NA	NA	NA	NA	NA	0.268867	0.746984
prom	gencode::SMUG1::ENSG00000123415.10	NA	NA	NA	NA	NA	NA	NA	NA	NA	NA	NA	NA	NA	NA	NA	NA	NA	NA	NA	NA	NA	NA	NA	NA	NA	NA	NA	NA	NA	NA	NA	NA
prom	gencode::SPATC1L::ENSG00000160284.10	NA	NA	NA	NA	NA	NA	NA	NA	NA	NA	NA	NA	NA	NA	NA	NA	NA	NA	NA	NA	NA	NA	NA	NA	NA	NA	NA	NA	NA	NA	NA	NA
prom	gencode::TERT::ENSG00000164362.14	NA	NA	NA	NA	NA	NA	NA	NA	NA	NA	NA	NA	NA	NA	NA	NA	NA	NA	NA	NA	NA	NA	NA	NA	NA	NA	NA	NA	NA	NA	NA	NA
prom	gencode::TM4SF18::ENSG00000163762.2	NA	NA	NA	NA	NA	NA	NA	NA	NA	NA	NA	NA	NA	NA	NA	NA	NA	NA	NA	NA	NA	NA	NA	NA	NA	NA	NA	NA	NA	NA	NA	NA
prom	gencode::TRAIP::ENSG00000183763.4	NA	NA	NA	NA	NA	NA	NA	NA	NA	NA	NA	NA	NA	NA	NA	NA	NA	NA	NA	NA	NA	NA	NA	NA	NA	NA	NA	NA	NA	NA	NA	NA
prom	gencode::WDR74::ENSG00000133316.11	NA	NA	NA	NA	NA	NA	NA	NA	NA	NA	NA	NA	NA	NA	0.889804	NA	NA	NA	NA	NA	NA	NA	NA	NA	NA	NA	NA	NA	NA	NA	0.889804	0.939237
ss	gencode::ABCG8::ENSG00000143921.6	NA	NA	NA	NA	NA	NA	NA	NA	0.717741	NA	NA	NA	NA	NA	0.776083	NA	NA	NA	NA	NA	NA	NA	NA	NA	NA	NA	NA	NA	NA	NA	0.882967	0.939237
ss	gencode::ARL11::ENSG00000152213.3	NA	NA	NA	NA	NA	NA	NA	NA	NA	NA	NA	NA	NA	NA	NA	NA	NA	NA	0.546304	NA	NA	NA	NA	NA	NA	NA	NA	NA	NA	NA	0.546304	0.8989
ss	gencode::CDKN2A::ENSG00000147889.12	NA	0.690388	NA	NA	NA	NA	NA	NA	0.470644	NA	NA	NA	0.495434	0.94417	0.431501	NA	NA	NA	NA	NA	NA	NA	NA	0.586844	NA	NA	NA	NA	NA	NA	0.887944	0.939237
ss	gencode::CLCF1::ENSG00000175505.9	NA	NA	NA	NA	NA	NA	NA	NA	NA	NA	NA	NA	NA	NA	NA	NA	NA	NA	NA	NA	NA	NA	NA	NA	NA	NA	NA	NA	NA	NA	NA	NA
ss	gencode::GJA3::ENSG00000121743.3	NA	NA	NA	NA	NA	NA	NA	NA	NA	NA	NA	NA	NA	NA	NA	NA	NA	NA	NA	NA	NA	NA	NA	NA	NA	NA	NA	NA	NA	NA	NA	NA
ss	gencode::ITGA11::ENSG00000137809.12	NA	NA	NA	NA	NA	NA	NA	NA	NA	NA	NA	NA	NA	NA	NA	NA	NA	NA	NA	NA	NA	NA	NA	NA	NA	0.304894	NA	NA	NA	NA	0.304894	0.755608
ss	gencode::KLHDC10::ENSG00000128607.9	NA	NA	NA	NA	NA	NA	NA	NA	NA	NA	0.32567	NA	NA	NA	NA	NA	NA	NA	NA	NA	NA	NA	NA	NA	NA	NA	NA	NA	NA	NA	0.32567	0.773467
ss	gencode::MARCH1::ENSG00000145416.9	NA	NA	NA	NA	NA	NA	NA	NA	NA	NA	NA	NA	NA	NA	NA	NA	NA	NA	NA	NA	NA	NA	NA	NA	NA	NA	NA	NA	NA	NA	NA	NA
ss	gencode::NF1::ENSG00000196712.12	NA	NA	NA	0.703585	NA	NA	NA	NA	NA	NA	NA	NA	0.0683374	0.877559	0.751414	NA	NA	NA	NA	0.37856	NA	NA	NA	0.522438	NA	0.0859161	NA	NA	NA	NA	0.37457	0.832524
ss	gencode::NPPB::ENSG00000120937.8	NA	NA	NA	NA	NA	NA	NA	NA	NA	NA	NA	NA	NA	NA	0.776083	NA	NA	NA	NA	NA	NA	NA	NA	NA	NA	NA	NA	NA	NA	NA	0.776083	0.92721
ss	gencode::OSBPL11::ENSG00000144909.7	NA	NA	NA	NA	NA	NA	NA	NA	NA	NA	NA	NA	NA	NA	NA	NA	NA	NA	NA	NA	NA	NA	NA	NA	NA	NA	NA	NA	NA	NA	NA	NA
ss	gencode::PAK7::ENSG00000101349.12	NA	NA	NA	NA	NA	NA	NA	NA	0.0798032	NA	NA	NA	NA	NA	0.461014	NA	NA	NA	NA	NA	NA	NA	NA	NA	NA	NA	NA	NA	NA	NA	0.158291	0.746984
ss	gencode::PBRM1::ENSG00000163939.14	NA	0.433492	NA	NA	NA	NA	NA	NA	NA	0.185249	0.919008	0.126266	NA	NA	0.57708	NA	NA	NA	0.766688	NA	NA	NA	NA	0.540974	NA	NA	NA	NA	NA	NA	0.589348	0.907914
ss	gencode::PGLYRP4::ENSG00000163218.10	NA	0.201001	NA	NA	NA	NA	NA	NA	NA	NA	NA	NA	NA	NA	NA	NA	NA	NA	NA	NA	NA	NA	NA	0.166099	NA	NA	NA	NA	NA	NA	0.146886	0.746984
ss	gencode::PTEN::ENSG00000171862.5	NA	NA	0.0963447	0.0594421	NA	NA	NA	NA	0.0870858	NA	NA	NA	NA	0.107251	NA	NA	NA	NA	NA	NA	0.332288	NA	NA	0.110426	NA	NA	NA	NA	0.523329	NA	0.0161802	0.307423
ss	gencode::SKA3::ENSG00000165480.11	NA	NA	NA	NA	NA	NA	NA	NA	0.539056	NA	NA	NA	NA	NA	NA	NA	NA	NA	0.275781	NA	NA	NA	NA	NA	NA	0.0229486	NA	0.344776	NA	NA	0.0960391	0.68636
ss	gencode::STK11::ENSG00000118046.10	NA	NA	NA	NA	NA	NA	NA	NA	NA	NA	NA	NA	NA	NA	0.00131704	NA	NA	NA	NA	NA	NA	NA	NA	NA	NA	NA	NA	NA	NA	NA	0.00131704	0.0375358
ss	gencode::SYNGR3::ENSG00000127561.10	NA	NA	NA	NA	NA	NA	NA	NA	NA	NA	NA	NA	NA	NA	NA	NA	NA	NA	NA	NA	NA	NA	NA	NA	NA	NA	NA	NA	NA	NA	NA	NA
ss	gencode::TAS1R1::ENSG00000173662.15	NA	NA	NA	NA	NA	NA	NA	NA	NA	NA	NA	NA	NA	NA	NA	NA	NA	NA	NA	NA	NA	NA	NA	NA	NA	NA	NA	NA	NA	NA	NA	NA
ss	gencode::TCN2::ENSG00000185339.4	NA	NA	NA	NA	NA	NA	NA	NA	NA	NA	NA	NA	NA	NA	NA	NA	NA	NA	NA	NA	NA	NA	NA	NA	NA	NA	NA	NA	NA	NA	NA	NA
ss	gencode::TGFB1::ENSG00000105329.5	NA	NA	NA	NA	NA	NA	NA	NA	NA	NA	NA	NA	NA	NA	NA	NA	NA	NA	NA	NA	NA	NA	NA	NA	NA	NA	NA	NA	NA	NA	NA	NA
ss	gencode::THTPA::ENSG00000259431.1	NA	NA	NA	NA	NA	NA	NA	NA	NA	NA	NA	NA	NA	NA	NA	NA	NA	NA	NA	NA	NA	NA	NA	NA	NA	NA	NA	NA	NA	NA	NA	NA
ss	gencode::TP53::ENSG00000141510.11	0.606585	0.0324387	0.00497491	NA	NA	NA	NA	NA	0.0158466	0.905866	0.0238357	NA	0.195845	0.095972	0.0673389	NA	NA	NA	0.922482	NA	0.0629468	NA	NA	NA	NA	NA	NA	NA	0.703334	NA	0.000405263	0.0231
ss	gencode::VHL::ENSG00000134086.7	NA	NA	NA	NA	NA	NA	NA	NA	NA	NA	0.829991	NA	NA	NA	NA	NA	NA	NA	NA	NA	NA	NA	NA	NA	NA	NA	NA	NA	NA	NA	0.829991	0.929812
ss	gencode::XCL1::ENSG00000143184.4	NA	NA	NA	NA	NA	NA	NA	NA	NA	NA	NA	NA	NA	NA	NA	NA	NA	NA	NA	NA	NA	NA	NA	NA	NA	NA	NA	NA	NA	NA	NA	NA
utr3	gencode::AC008964.1::ENSG00000269215.1	NA	NA	NA	NA	NA	NA	NA	NA	NA	NA	NA	NA	NA	NA	NA	NA	NA	NA	NA	NA	NA	NA	NA	NA	NA	NA	NA	NA	NA	NA	NA	NA
utr3	gencode::AC145676.2::ENSG00000249852.1	NA	NA	NA	NA	NA	NA	NA	NA	NA	NA	NA	NA	NA	NA	NA	NA	NA	NA	NA	NA	NA	NA	NA	NA	NA	NA	NA	NA	NA	NA	NA	NA
utr3	gencode::ADAM28::ENSG00000042980.8	NA	NA	NA	0.139904	NA	NA	NA	NA	NA	0.606283	NA	NA	NA	NA	NA	NA	NA	NA	NA	NA	0.461048	NA	NA	NA	NA	NA	NA	0.828719	NA	NA	0.551956	0.8989
utr3	gencode::ARMC4::ENSG00000169126.11	NA	0.0827393	NA	0.228113	NA	NA	NA	NA	NA	NA	NA	NA	NA	NA	NA	NA	NA	NA	NA	NA	NA	NA	NA	0.712099	NA	NA	NA	NA	NA	NA	0.196164	0.746984
utr3	gencode::C1QTNF7::ENSG00000163145.8	NA	0.170023	0.386001	NA	NA	NA	NA	NA	NA	NA	NA	NA	NA	NA	NA	NA	NA	NA	NA	NA	NA	NA	NA	NA	NA	NA	NA	NA	NA	NA	0.244385	0.746984
utr3	gencode::C1orf61::ENSG00000125462.12	NA	NA	NA	0.191937	NA	NA	NA	NA	0.679209	NA	NA	NA	NA	NA	NA	NA	NA	NA	NA	NA	NA	NA	NA	NA	NA	NA	NA	NA	NA	NA	0.395973	0.832524
utr3	gencode::C7::ENSG00000112936.14	NA	NA	NA	NA	NA	NA	NA	NA	NA	NA	NA	NA	NA	0.80457	NA	NA	NA	NA	NA	NA	NA	NA	NA	NA	NA	NA	NA	NA	NA	NA	0.80457	0.929812
utr3	gencode::C9orf170::ENSG00000204446.2	NA	0.390151	NA	NA	NA	NA	NA	NA	NA	NA	NA	0.520989	NA	NA	0.443381	NA	NA	NA	NA	NA	NA	NA	NA	0.0953038	NA	NA	NA	NA	NA	NA	0.300765	0.755608
utr3	gencode::CDH12::ENSG00000154162.9	NA	0.170263	NA	0.0401869	NA	NA	NA	NA	0.549403	NA	0.958609	NA	0.5289	NA	0.969164	NA	NA	NA	0.517375	0.399872	0.700444	NA	NA	NA	NA	0.294831	NA	NA	NA	NA	0.528714	0.8989
utr3	gencode::DRD5::ENSG00000169676.4	0.639447	NA	NA	0.308519	NA	NA	NA	NA	NA	NA	NA	NA	NA	NA	0.0493759	NA	NA	NA	NA	NA	NA	NA	NA	NA	NA	NA	NA	NA	NA	NA	0.159327	0.746984
utr3	gencode::EDN3::ENSG00000124205.11	NA	0.645409	NA	NA	NA	NA	NA	NA	NA	NA	NA	NA	NA	NA	0.498536	NA	NA	NA	NA	NA	NA	NA	NA	NA	NA	NA	NA	NA	NA	NA	0.686619	0.92721
utr3	gencode::ELOVL3::ENSG00000119915.4	NA	NA	NA	NA	NA	NA	NA	NA	NA	NA	NA	NA	NA	NA	NA	NA	NA	NA	0.0937356	NA	NA	NA	NA	NA	NA	NA	NA	NA	NA	NA	0.0937356	0.68636
utr3	gencode::FAHD2B::ENSG00000144199.7	NA	NA	NA	NA	NA	NA	NA	NA	NA	NA	NA	NA	NA	NA	0.698184	NA	NA	NA	0.983484	NA	NA	NA	NA	NA	NA	0.108049	NA	0.478562	NA	NA	0.571944	0.905579
utr3	gencode::INA::ENSG00000148798.5	NA	NA	NA	0.654364	NA	NA	NA	NA	NA	NA	NA	NA	NA	NA	NA	NA	NA	NA	NA	NA	NA	NA	NA	NA	NA	NA	NA	NA	NA	NA	0.654364	0.92721
utr3	gencode::LGSN::ENSG00000146166.12	NA	NA	NA	NA	NA	NA	NA	NA	0.00381941	NA	0.225224	NA	0.589211	NA	0.891306	NA	NA	NA	NA	NA	0.700367	NA	NA	NA	NA	NA	NA	NA	NA	NA	0.0963312	0.68636
utr3	gencode::LRTM1::ENSG00000144771.7	NA	NA	NA	NA	NA	NA	NA	NA	NA	NA	NA	NA	NA	0.880943	NA	NA	NA	NA	NA	NA	NA	NA	NA	1	NA	NA	NA	NA	NA	NA	0.992613	0.992613
utr3	gencode::MUC19::ENSG00000205592.9	NA	NA	NA	NA	NA	NA	NA	NA	NA	NA	NA	NA	NA	NA	NA	NA	NA	NA	NA	NA	NA	NA	NA	NA	NA	NA	NA	NA	NA	NA	NA	NA
utr3	gencode::MYO5B::ENSG00000167306.14	NA	NA	NA	NA	NA	NA	NA	NA	0.183012	NA	NA	NA	NA	NA	NA	NA	NA	NA	NA	NA	NA	NA	NA	NA	NA	NA	NA	NA	NA	NA	0.183012	0.746984
utr3	gencode::PAFAH1B2::ENSG00000168092.9	NA	NA	NA	0.780809	NA	NA	NA	NA	NA	NA	NA	NA	NA	NA	NA	NA	NA	NA	NA	NA	NA	NA	NA	NA	NA	NA	NA	NA	NA	NA	0.780809	0.92721
utr3	gencode::PRSS3::ENSG00000010438.12	NA	NA	0.34799	0.0441161	NA	NA	NA	NA	0.0557778	0.683367	NA	NA	0.781267	0.450473	NA	NA	NA	NA	0.106244	0.79959	NA	NA	NA	0.364546	NA	0.416684	NA	0.88337	0.121029	0.656194	0.228631	0.746984
utr3	gencode::PSG6::ENSG00000170848.11	NA	0.733964	NA	NA	NA	NA	NA	NA	0.57467	NA	NA	NA	NA	0.925505	NA	NA	NA	NA	NA	NA	NA	NA	NA	NA	NA	NA	NA	NA	NA	NA	0.930282	0.946894
utr3	gencode::SEC14L1::ENSG00000129657.10	NA	0.690388	NA	0.147585	NA	NA	NA	NA	0.118903	NA	0.4579	NA	0.610335	0.049197	0.431501	NA	NA	NA	0.0797911	0.685601	0.891642	NA	NA	0.965622	NA	0.496303	NA	NA	0.927354	NA	0.422849	0.832524
utr3	gencode::SERPINB3::ENSG00000057149.10	NA	NA	NA	0.968291	NA	NA	NA	NA	NA	NA	NA	NA	NA	NA	0.195482	NA	NA	NA	0.740454	NA	NA	NA	NA	0.487479	NA	NA	NA	NA	NA	NA	0.717725	0.92721
utr3	gencode::SGCZ::ENSG00000185053.8	NA	NA	NA	NA	NA	NA	NA	NA	0.653872	NA	NA	NA	0.0599628	NA	0.726107	NA	NA	NA	NA	NA	NA	NA	NA	0.907624	NA	NA	NA	NA	NA	NA	0.503405	0.8989
utr3	gencode::TBC1D22A::ENSG00000054611.9	NA	NA	NA	0.0730046	NA	NA	NA	NA	NA	NA	NA	NA	0.950082	NA	0.759204	NA	NA	NA	0.330515	NA	NA	NA	NA	NA	NA	NA	NA	NA	NA	NA	0.423565	0.832524
utr5	gencode::C16orf59::ENSG00000162062.10	NA	NA	NA	NA	NA	NA	NA	NA	NA	NA	NA	NA	NA	NA	NA	NA	NA	NA	NA	NA	NA	NA	NA	NA	NA	NA	NA	NA	NA	NA	NA	NA
utr5	gencode::C19orf53::ENSG00000104979.4	NA	NA	NA	NA	NA	NA	NA	NA	NA	NA	NA	NA	NA	NA	NA	NA	NA	NA	NA	NA	NA	NA	NA	NA	NA	NA	NA	NA	NA	NA	NA	NA
utr5	gencode::CAST::ENSG00000153113.19	NA	NA	NA	NA	NA	NA	NA	NA	NA	NA	NA	NA	NA	NA	NA	NA	NA	NA	NA	NA	NA	NA	NA	0.0894756	NA	NA	NA	NA	NA	NA	0.0894756	0.68636
utr5	gencode::CD1A::ENSG00000158477.6	NA	NA	NA	NA	NA	NA	NA	NA	NA	NA	NA	NA	NA	0.304751	0.114803	NA	NA	NA	0.104124	NA	NA	NA	NA	0.865016	NA	NA	NA	NA	NA	NA	0.173941	0.746984
utr5	gencode::CDH10::ENSG00000040731.6	NA	NA	NA	NA	NA	NA	NA	NA	0.677373	NA	0.631579	NA	NA	NA	0.40074	NA	NA	NA	NA	NA	NA	NA	NA	0.00407546	NA	NA	NA	NA	0.18864	NA	0.0572247	0.68636
utr5	gencode::CGB5::ENSG00000189052.6	NA	0.9461	NA	NA	NA	NA	NA	NA	0.168927	NA	NA	NA	NA	0.786888	0.428639	NA	NA	NA	0.520073	NA	NA	NA	NA	NA	NA	NA	NA	NA	NA	NA	0.711347	0.92721
utr5	gencode::COL21A1::ENSG00000124749.12	NA	NA	NA	NA	NA	NA	NA	NA	NA	NA	NA	NA	NA	NA	NA	NA	NA	NA	NA	NA	NA	NA	NA	NA	NA	NA	NA	NA	NA	NA	NA	NA
utr5	gencode::CRP::ENSG00000132693.8	NA	0.57238	NA	NA	NA	NA	NA	NA	NA	NA	NA	NA	NA	0.516379	0.592109	NA	NA	NA	NA	NA	NA	NA	NA	0.675512	NA	NA	NA	NA	NA	NA	0.831937	0.929812
utr5	gencode::DHRS1::ENSG00000157379.9	NA	NA	NA	NA	NA	NA	NA	NA	NA	NA	NA	NA	NA	NA	NA	NA	NA	NA	NA	NA	NA	NA	NA	NA	NA	NA	NA	NA	NA	NA	NA	NA
utr5	gencode::DHX16::ENSG00000204560.5	NA	NA	NA	0.637393	NA	NA	NA	NA	NA	NA	NA	0.246583	NA	NA	NA	NA	NA	NA	NA	NA	NA	NA	NA	NA	NA	NA	NA	NA	NA	NA	0.448002	0.851204
utr5	gencode::ERGIC3::ENSG00000125991.14	NA	NA	NA	NA	NA	NA	NA	NA	0.59576	NA	NA	NA	NA	NA	NA	NA	NA	NA	NA	NA	NA	NA	NA	0.655231	NA	NA	NA	NA	NA	NA	0.757566	0.92721
utr5	gencode::EVI2A::ENSG00000126860.7	NA	NA	NA	NA	NA	NA	NA	NA	NA	NA	NA	NA	NA	NA	NA	NA	NA	NA	NA	NA	NA	NA	NA	NA	NA	NA	NA	NA	NA	NA	NA	NA
utr5	gencode::KIAA1737::ENSG00000198894.3	NA	NA	NA	NA	0.722222	NA	NA	NA	NA	NA	NA	NA	NA	NA	0.55212	NA	NA	NA	NA	NA	NA	NA	NA	NA	NA	NA	NA	NA	NA	NA	0.765372	0.92721
utr5	gencode::MALSU1::ENSG00000156928.4	NA	NA	NA	NA	NA	NA	NA	NA	NA	NA	NA	NA	NA	NA	NA	NA	NA	NA	NA	NA	NA	NA	NA	NA	NA	NA	NA	NA	NA	NA	NA	NA
utr5	gencode::MAP1S::ENSG00000130479.6	NA	NA	NA	NA	NA	NA	NA	NA	NA	NA	NA	NA	NA	NA	NA	NA	NA	NA	NA	NA	NA	NA	NA	NA	NA	NA	NA	NA	NA	NA	NA	NA
utr5	gencode::MRPL36::ENSG00000171421.8	NA	NA	NA	NA	NA	NA	NA	NA	NA	NA	NA	NA	NA	NA	NA	NA	NA	NA	NA	NA	NA	NA	NA	NA	NA	NA	NA	NA	NA	NA	NA	NA
utr5	gencode::MTG2::ENSG00000101181.13	NA	NA	NA	NA	NA	NA	NA	NA	NA	NA	NA	NA	NA	NA	NA	NA	NA	NA	NA	NA	NA	NA	NA	NA	NA	NA	NA	NA	NA	NA	NA	NA
utr5	gencode::MTRNR2L13::ENSG00000270394.1	NA	NA	NA	NA	NA	NA	NA	NA	NA	NA	NA	NA	NA	NA	NA	NA	NA	NA	NA	NA	NA	NA	NA	NA	NA	NA	NA	NA	NA	NA	NA	NA
utr5	gencode::NDUFB9::ENSG00000147684.3	NA	NA	NA	0.0888697	NA	NA	NA	NA	0.333361	NA	NA	NA	NA	NA	0.275952	NA	NA	NA	NA	NA	NA	NA	NA	0.517964	NA	NA	NA	NA	NA	NA	0.205755	0.746984
utr5	gencode::PRKAG1::ENSG00000181929.7	NA	NA	NA	0.528461	0.777778	NA	NA	NA	0.280464	NA	0.441417	NA	NA	0.256596	0.248968	NA	NA	NA	NA	NA	NA	NA	NA	0.0454579	NA	NA	NA	NA	NA	NA	0.223689	0.746984
utr5	gencode::SDHD::ENSG00000204370.4	NA	0.487859	NA	NA	NA	NA	NA	NA	0.316687	NA	NA	0.684641	NA	NA	0.163834	NA	NA	NA	NA	NA	NA	NA	NA	NA	NA	NA	NA	NA	NA	NA	0.422736	0.832524
utr5	gencode::SIRPD::ENSG00000125900.8	NA	NA	NA	NA	NA	NA	NA	NA	NA	NA	NA	NA	NA	NA	NA	NA	NA	NA	NA	NA	NA	NA	NA	NA	NA	0.739036	NA	NA	NA	NA	0.739036	0.92721
utr5	gencode::TBC1D12::ENSG00000108239.8	NA	0.305721	NA	0.496662	NA	NA	NA	NA	0.803017	NA	NA	NA	NA	NA	0.661359	NA	NA	NA	NA	NA	NA	NA	NA	NA	NA	0.415501	NA	NA	NA	NA	0.744918	0.92721
utr5	gencode::TBC1D29::ENSG00000266733.1	NA	0.700184	0.6137	0.77388	NA	NA	NA	NA	0.00846346	NA	NA	NA	NA	NA	0.46758	NA	NA	NA	0.594212	NA	0.681427	NA	NA	NA	NA	0.0589364	NA	0.697089	NA	NA	0.2569	0.746984
utr5	gencode::WDR74::ENSG00000133316.11	NA	NA	NA	NA	NA	NA	NA	NA	0.778704	NA	NA	NA	NA	NA	NA	NA	NA	NA	NA	NA	NA	NA	NA	NA	NA	NA	NA	NA	0.784451	NA	0.911943	0.945104

## Sheet: TCGA505_UDGstat_SMUG1.UNG_exp
sample_id	cancer_type	n_mut_total	UDG_statistic	smug1_log2expression	ung_log2expression
TCGA-02-2483-01A	GBM	6764	0.158782	3.76458	5.21948
TCGA-02-2485-01A	GBM	7234	0.168372	2.99386	4.93946
TCGA-05-4389-01A	LUAD	18834	0.183232	4.81527	5.00724
TCGA-05-4395-01A	LUAD	42138	0.204495	4.56888	4.82146
TCGA-05-4396-01A	LUAD	42692	0.153401	4.32452	3.94411
TCGA-05-4397-01A	LUAD	104299	0.166147	4.32524	5.41021
TCGA-05-4398-01A	LUAD	76047	0.136139	4.03747	4.51954
TCGA-05-4420-01A	LUAD	32198	0.134543	4.30867	5.45296
TCGA-05-4422-01A	LUAD	5238	0.272241	3.67491	4.79784
TCGA-05-4432-01A	LUAD	50402	0.150788	4.37016	4.86478
TCGA-05-5429-01A	LUAD	10582	0.169061	4.06609	4.50805
TCGA-06-0125-01A	GBM	9936	0.184481	3.35769	4.74534
TCGA-06-0157-01A	GBM	6210	0.191787	3.31701	5.16241
TCGA-06-0190-01A	GBM	6264	0.167944	3.0229	4.47379
TCGA-06-0686-01A	GBM	8930	0.199664	3.8491	4.10777
TCGA-06-0744-01A	GBM	11921	0.17725	3.37337	5.08717
TCGA-06-0745-01A	GBM	9063	0.179852	4.62877	4.88166
TCGA-06-2557-01A	GBM	7264	0.201542	3.52845	4.47774
TCGA-06-2570-01A	GBM	4247	0.194019	3.49313	4.32955
TCGA-06-5411-01A	GBM	9116	0.169153	3.76967	4.1639
TCGA-06-5415-01A	GBM	7790	0.150449	3.84599	5.66038
TCGA-14-1034-01A	GBM	8446	0.20933	3.38929	5.37473
TCGA-14-1823-01A	GBM	6069	0.175812	4.3817	4.82166
TCGA-14-2554-01A	GBM	10607	0.141322	4.50672	4.85873
TCGA-15-1444-01A	GBM	8877	0.133716	4.35283	4.30881
TCGA-18-3408-01A	LUSC	11880	0.213468	3.54942	5.01855
TCGA-18-3415-01A	LUSC	26225	0.255291	4.22172	4.6573
TCGA-18-4721-01A	LUSC	21931	0.17856	3.848	5.74149
TCGA-19-2620-01A	GBM	10375	0.16241	3.11703	4.8542
TCGA-19-2624-01A	GBM	4983	0.215332	2.96292	4.10894
TCGA-19-2629-01A	GBM	6409	0.162896	4.15567	4.79722
TCGA-19-5960-01A	GBM	7687	0.181605	3.36625	5.22763
TCGA-21-1076-01A	LUSC	23497	0.155552	2.93263	4.40858
TCGA-21-1078-01A	LUSC	5561	0.334113	3.8516	5.10341
TCGA-21-1082-01A	LUSC	41447	0.166815	3.76256	5.67937
TCGA-21-5782-01A	LUSC	50893	0.177176	3.85689	5.28007
TCGA-22-1016-01A	LUSC	40578	0.140988	3.49685	5.05897
TCGA-22-5477-01A	LUSC	24617	0.280944	4.60057	5.63729
TCGA-22-5492-01A	LUSC	40249	0.152998	3.35713	5.21335
TCGA-26-5132-01A	GBM	11338	0.176839	2.83734	4.86617
TCGA-26-5135-01A	GBM	12855	0.184753	4.09753	3.82955
TCGA-27-1831-01A	GBM	5965	0.188433	4.00387	4.44976
TCGA-27-2523-01A	GBM	8158	0.174062	3.90034	4.7235
TCGA-27-2528-01A	GBM	12290	0.160456	3.27411	4.85015
TCGA-32-1970-01A	GBM	8781	0.15841	3.73433	4.9619
TCGA-33-4586-01A	LUSC	69276	0.147598	4.15113	5.48046
TCGA-34-2596-01A	LUSC	42244	0.17683	3.70631	5.62524
TCGA-34-2600-01A	LUSC	46325	0.220313	4.02813	5.52027
TCGA-34-5240-01A	LUSC	31735	0.186639	4.38908	5.00297
TCGA-37-4135-01A	LUSC	54935	0.161008	4.42156	5.52074
TCGA-38-4630-01A	LUAD	50543	0.180915	4.68846	5.5564
TCGA-41-5651-01A	GBM	11171	0.169904	3.3083	5.32851
TCGA-43-3394-01A	LUSC	30274	0.154852	4.14983	5.40299
TCGA-43-3920-01A	LUSC	41506	0.199031	3.88333	4.1861
TCGA-43-5670-01A	LUSC	14515	0.254495	4.67818	4.20391
TCGA-44-2659-01A	LUAD	45131	0.123308	3.37114	3.35727
TCGA-44-2665-01A	LUAD	7562	0.243454	3.69788	4.14037
TCGA-44-2666-01A	LUAD	2883	0.243496	1.95791	4.75585
TCGA-44-6148-01A	LUAD	773	0.256145	2.95382	3.88645
TCGA-49-4486-01A	LUAD	10809	0.199093	4.14828	3.80498
TCGA-49-4510-01A	LUAD	6148	0.177293	5.34127	2.69109
TCGA-49-4512-01A	LUAD	2768	0.233743	3.60561	4.17057
TCGA-49-6742-01A	LUAD	29523	0.295973	4.4941	4.85499
TCGA-50-5066-01A	LUAD	143255	0.126816	3.6412	4.1076
TCGA-50-5930-01A	LUAD	135112	0.103292	3.47755	4.37553
TCGA-50-5932-01A	LUAD	13093	0.1581	3.22836	3.7148
TCGA-50-6591-01A	LUAD	6507	0.230982	2.60573	4.48253
TCGA-50-6597-01A	LUAD	6076	0.276169	3.7252	3.8801
TCGA-52-7812-01A	LUSC	53065	0.149496	4.10291	5.92046
TCGA-55-1594-01A	LUAD	14078	0.204646	4.34667	5.47913
TCGA-55-1596-01A	LUAD	27186	0.148128	4.57016	5.43766
TCGA-55-6972-01A	LUAD	35655	0.216323	3.88636	3.90256
TCGA-55-6982-01A	LUAD	5519	0.333213	3.21179	3.5399
TCGA-55-6984-01A	LUAD	2739	0.236218	2.54424	3.16912
TCGA-55-6986-01A	LUAD	1373	0.225055	3.21785	3.37698
TCGA-55-7281-01A	LUAD	53882	0.127445	3.78	3.83693
TCGA-55-8299-01A	LUAD	1734	0.204729	3.12466	3.48324
TCGA-56-1622-01A	LUSC	43734	0.15105	3.18808	4.80343
TCGA-56-7582-01A	LUSC	31538	0.208732	3.41238	5.7536
TCGA-60-2695-01A	LUSC	25826	0.155309	4.29624	5.71152
TCGA-60-2698-01A	LUSC	85369	0.228057	4.47093	4.39225
TCGA-60-2711-01A	LUSC	16263	0.180963	4.33321	5.66908
TCGA-60-2713-01A	LUSC	34703	0.165519	3.31179	4.97568
TCGA-60-2719-01A	LUSC	25262	0.167762	3.90804	5.62196
TCGA-60-2722-01A	LUSC	53069	0.198477	3.35952	4.98523
TCGA-60-2724-01A	LUSC	44113	0.170086	3.84348	5.03927
TCGA-64-1678-01A	LUAD	54416	0.13428	4.53412	4.26236
TCGA-66-2744-01A	LUSC	38222	0.172388	3.8267	4.71814
TCGA-66-2756-01A	LUSC	67703	0.132727	4.02777	6.26774
TCGA-66-2757-01A	LUSC	36040	0.149501	4.26176	6.48892
TCGA-66-2759-01A	LUSC	66634	0.16379	4.00099	5.81581
TCGA-66-2766-01A	LUSC	55318	0.21662	5.00702	5.05155
TCGA-66-2789-01A	LUSC	58441	0.167177	3.86948	4.86324
TCGA-66-2793-01A	LUSC	47756	0.155143	4.2891	5.98299
TCGA-66-2795-01A	LUSC	57564	0.157268	3.56255	5.31321
TCGA-67-3771-01A	LUAD	107652	0.187623	3.89724	3.91877
TCGA-67-3772-01A	LUAD	2053	0.249391	3.9925	3.71512
TCGA-67-6215-01A	LUAD	8177	0.137703	2.75125	3.65821
TCGA-68-7755-01A	LUSC	48173	0.185643	3.95084	5.47447
TCGA-68-8250-01A	LUSC	47153	0.135474	4.16583	4.36121
TCGA-73-4659-01A	LUAD	20876	0.138005	3.5493	4.43849
TCGA-75-5147-01A	LUAD	22651	0.143702	4.0982	5.18245
TCGA-75-6203-01A	LUAD	62803	0.127462	2.584	3.11137
TCGA-75-7030-01A	LUAD	1506	0.225764	2.89976	3.69455
TCGA-77-6843-01A	LUSC	22975	0.182764	4.06065	4.64074
TCGA-77-7139-01A	LUSC	29594	0.200142	3.42747	5.41843
TCGA-78-7146-01A	LUAD	37400	0.153396	3.45694	5.37288
TCGA-78-7156-01A	LUAD	31962	0.160753	3.22759	3.59419
TCGA-78-7158-01A	LUAD	38606	0.14648	2.61965	4.31564
TCGA-78-7535-01A	LUAD	21208	0.150462	4.19069	3.69432
TCGA-85-8277-01A	LUSC	43287	0.197796	3.39191	5.65941
TCGA-91-6840-01A	LUAD	14688	0.239788	3.43896	4.97062
TCGA-91-6847-01A	LUAD	7840	0.213776	3.16511	5.36338
TCGA-92-8064-01A	LUSC	28579	0.158613	3.62585	5.0654
TCGA-94-7943-01A	LUSC	16589	0.28109	4.31179	5.66289
TCGA-96-7545-01A	LUSC	16846	0.18497	3.23833	4.4268
TCGA-97-8171-01A	LUAD	6323	0.252412	4.08125	4.83693
TCGA-98-8022-01A	LUSC	31242	0.150599	3.82416	4.80828
TCGA-A1-A0SM-01A	BRCA	2649	0.230276	3.14029	4.00881
TCGA-A2-A04P-01A	BRCA	11617	0.179478	3.42774	4.32711
TCGA-A2-A04Q-01A	BRCA	1463	0.244019	3.56181	4.91001
TCGA-A2-A04T-01A	BRCA	9384	0.185955	3.69399	5.51674
TCGA-A2-A04X-01A	BRCA	4200	0.365714	4.17672	4.94659
TCGA-A2-A0CM-01A	BRCA	10102	0.277965	3.04492	4.86369
TCGA-A2-A0D0-01A	BRCA	8787	0.176169	3.09373	6.59011
TCGA-A2-A0D1-01A	BRCA	5846	0.295416	2.8486	4.03729
TCGA-A2-A0D2-01A	BRCA	8728	0.19088	2.49518	5.47528
TCGA-A2-A0D4-01A	BRCA	4357	0.210695	4.08823	5.44457
TCGA-A2-A0EY-01A	BRCA	17629	0.427024	3.80746	4.10014
TCGA-A2-A0YG-01A	BRCA	4163	0.236368	3.8477	5.16639
TCGA-A2-A259-01A	BRCA	2297	0.225512	2.70221	4.57337
TCGA-A2-A25B-01A	BRCA	7982	0.203082	4.03527	4.74238
TCGA-A2-A3KC-01A	BRCA	3096	0.226421	3.77716	4.96014
TCGA-A2-A3XX-01A	BRCA	3881	0.204071	3.19802	4.58988
TCGA-A2-A3Y0-01A	BRCA	12213	0.178744	4.39019	5.04247
TCGA-A3-3308-01A	KIRC	7812	0.227855	3.03545	4.07938
TCGA-A3-3324-01A	KIRC	5652	0.219568	2.87283	4.33178
TCGA-A3-3370-01A	KIRC	4860	0.242593	3.02059	4.51879
TCGA-A3-3372-01A	KIRC	7348	0.217202	2.7264	3.89947
TCGA-A3-3387-01A	KIRC	4456	0.212522	3.24215	4.46349
TCGA-A5-A0G9-01A	UCEC	19629	0.252636	3.55888	3.74868
TCGA-A5-A0GA-01A	UCEC	23877	0.293295	4.57568	4.9606
TCGA-A5-A0GE-01A	UCEC	4624	0.206747	4.2358	5.11682
TCGA-A5-A0GG-01A	UCEC	12360	0.28479	3.778	4.51973
TCGA-A5-A0GJ-01A	UCEC	15525	0.150596	4.37851	2.43616
TCGA-A6-2680-01A	CRC	12047	0.157301	2.91399	4.55949
TCGA-A6-2681-01A	CRC	13905	0.16361	3.11203	4.89356
TCGA-A6-2683-01A	CRC	23611	0.122104	2.29572	3.76118
TCGA-A6-3807-01A	CRC	7900	0.167722	3.09879	4.61164
TCGA-A6-6141-01A	CRC	196614	0.117194	3.40626	5.37855
TCGA-A6-6781-01A	CRC	108051	0.244237	3.26093	4.68717
TCGA-A7-A0CE-01A	BRCA	9654	0.169671	3.69977	5.68961
TCGA-A7-A13D-01A	BRCA	9164	0.191729	2.79286	4.51482
TCGA-A7-A26G-01A	BRCA	3800	0.213421	2.66993	4.42445
TCGA-A8-A075-01A	BRCA	7933	0.277953	3.60751	4.49025
TCGA-A8-A07B-01A	BRCA	7295	0.286909	1.91456	4.50545
TCGA-A8-A07I-01A	BRCA	5864	0.241473	2.80281	4.41183
TCGA-A8-A08B-01A	BRCA	4513	0.319078	3.36989	4.43176
TCGA-A8-A08L-01A	BRCA	23332	0.254286	4.19464	4.55839
TCGA-A8-A08S-01A	BRCA	5300	0.220566	3.87243	4.68134
TCGA-A8-A092-01A	BRCA	9040	0.304867	3.63297	6.31363
TCGA-A8-A094-01A	BRCA	18644	0.316348	3.02112	5.15263
TCGA-A8-A09I-01A	BRCA	11553	0.272397	4.19275	5.54303
TCGA-A8-A09X-01A	BRCA	3550	0.285352	3.7801	5.90439
TCGA-AA-3514-01A	CRC	15255	0.174172	2.67401	4.22165
TCGA-AA-3516-01A	CRC	150995	0.221948	3.24823	5.27367
TCGA-AA-3518-01A	CRC	75849	0.212317	3.01114	5.5464
TCGA-AA-3529-01A	CRC	16522	0.155853	3.76744	6.36634
TCGA-AA-3534-01A	CRC	12791	0.17309	3.37921	5.96657
TCGA-AA-3555-01A	CRC	244718	0.142078	3.16446	5.13381
TCGA-AA-3664-01A	CRC	20371	0.166609	2.90014	5.47577
TCGA-AA-3666-01A	CRC	24033	0.124204	2.82904	5.34756
TCGA-AA-3956-01A	CRC	14023	0.152678	3.01667	5.42025
TCGA-AA-3977-01A	CRC	724186	0.124189	3.16076	6.0016
TCGA-AA-3994-01A	CRC	19827	0.152318	3.18063	4.87961
TCGA-AA-A01R-01A	CRC	135481	0.210996	3.23005	5.15291
TCGA-AA-A01S-01A	CRC	9023	0.176327	3.25505	5.36989
TCGA-AA-A01T-01A	CRC	12955	0.174759	3.34682	4.07382
TCGA-AA-A01V-01A	CRC	18614	0.127592	3.24458	4.59604
TCGA-AA-A01X-01A	CRC	10142	0.176494	3.50665	5.58733
TCGA-AA-A02O-01A	CRC	22381	0.135204	4.1177	5.55784
TCGA-AA-A03F-01A	CRC	17081	0.166618	2.70199	3.91867
TCGA-AC-A2BK-01A	BRCA	14582	0.185297	3.27143	5.73931
TCGA-AD-6964-01A	CRC	88326	0.320721	3.78586	5.2854
TCGA-AF-2691-01A	CRC	15172	0.178421	3.12002	4.80069
TCGA-AF-3913-01A	CRC	14607	0.168002	2.63227	5.45878
TCGA-AG-3574-01A	CRC	11154	0.174198	3.97113	5.74157
TCGA-AG-3593-01A	CRC	19316	0.137451	3.18777	5.22354
TCGA-AG-3727-01A	CRC	13088	0.160147	2.37657	4.06893
TCGA-AG-3885-01A	CRC	11611	0.144001	3.14617	4.24595
TCGA-AG-3890-01A	CRC	12965	0.168222	3.85798	5.33303
TCGA-AG-3896-01A	CRC	12451	0.173641	3.39972	5.44308
TCGA-AG-3901-01A	CRC	7454	0.164207	3.13521	5.21214
TCGA-AG-4007-01A	CRC	19375	0.169239	3.48427	4.66414
TCGA-AG-4008-01A	CRC	12068	0.157358	3.51109	5.3428
TCGA-AG-4015-01A	CRC	13119	0.190335	3.14421	4.98007
TCGA-AG-A032-01A	CRC	8329	0.179613	3.05987	4.80002
TCGA-AJ-A23M-01A	UCEC	12101	0.213453	4.40572	5.49221
TCGA-AK-3454-01A	KIRC	5329	0.241133	2.92334	4.76144
TCGA-AK-3455-01A	KIRC	5761	0.242493	3.38267	4.59956
TCGA-AN-A04D-01A	BRCA	9989	0.177195	3.7229	6.05832
TCGA-AN-A0AT-01A	BRCA	10156	0.186589	3.07159	5.62889
TCGA-AN-A0XR-01A	BRCA	4203	0.218415	3.95187	4.70216
TCGA-AO-A03L-01A	BRCA	2913	0.23172	4.0895	4.89995
TCGA-AO-A03N-01B	BRCA	8647	0.336764	4.61282	5.43075
TCGA-AO-A0J2-01A	BRCA	9569	0.16219	4.04212	4.39032
TCGA-AO-A0J4-01A	BRCA	7664	0.192328	2.57701	4.78104
TCGA-AO-A0J6-01A	BRCA	13398	0.196447	2.74006	5.47346
TCGA-AO-A0JM-01A	BRCA	4219	0.209765	3.98003	4.38522
TCGA-AO-A124-01A	BRCA	18248	0.170484	3.13471	5.59589
TCGA-AO-A12H-01A	BRCA	2657	0.23598	3.72334	4.80178
TCGA-AP-A051-01A	UCEC	681339	0.334554	3.55471	4.47067
TCGA-AP-A052-01A	UCEC	4688	0.200725	4.25995	4.37226
TCGA-AP-A053-01A	UCEC	6077	0.217871	3.36611	4.51469
TCGA-AP-A054-01A	UCEC	125137	0.0955832	3.51866	6.29974
TCGA-AP-A05A-01A	UCEC	8305	0.205298	3.7941	5.21731
TCGA-AP-A05D-01A	UCEC	4681	0.211707	3.4272	3.52895
TCGA-AP-A0L8-01A	UCEC	11108	0.183201	3.35924	5.28644
TCGA-AP-A0L9-01A	UCEC	10749	0.217695	4.05094	4.45595
TCGA-AP-A0LD-01A	UCEC	51344	0.196479	3.96431	4.83966
TCGA-AP-A0LE-01A	UCEC	57625	0.260495	4.7667	4.91791
TCGA-AP-A0LF-01A	UCEC	14782	0.233527	4.06169	4.49633
TCGA-AP-A0LH-01A	UCEC	4943	0.218693	3.89908	4.69766
TCGA-AP-A0LI-01A	UCEC	9288	0.239233	3.83319	3.77631
TCGA-AP-A0LL-01A	UCEC	4600	0.22587	4.31216	2.84378
TCGA-AP-A0LO-01A	UCEC	7139	0.113741	3.41224	4.48974
TCGA-AQ-A04J-01A	BRCA	5323	0.174714	2.83086	4.84021
TCGA-AR-A0TX-01A	BRCA	22584	0.397007	3.80116	3.67322
TCGA-AR-A1AY-01A	BRCA	5866	0.207467	2.91686	5.95884
TCGA-AR-A24Z-01A	BRCA	5635	0.22307	3.34426	5.39431
TCGA-AR-A256-01A	BRCA	18780	0.186049	1.82293	5.58724
TCGA-AR-A2LK-01A	BRCA	4757	0.240488	3.66676	5.12615
TCGA-AX-A05S-01A	UCEC	40458	0.270997	3.48761	4.38294
TCGA-AX-A06B-01A	UCEC	4707	0.192267	3.21521	5.47709
TCGA-AX-A0J1-01A	UCEC	377695	0.414348	4.27001	4.02414
TCGA-AX-A1C8-01A	UCEC	6230	0.222793	3.90574	4.68061
TCGA-AX-A1CI-01A	UCEC	5023	0.20227	4.31441	3.78052
TCGA-AX-A2H5-01A	UCEC	8591	0.209754	4.10476	5.37983
TCGA-AZ-6601-01A	CRC	112644	0.241114	3.52732	5.8763
TCGA-B0-5094-01A	KIRC	7471	0.225137	3.34596	4.70321
TCGA-B0-5693-01A	KIRC	4765	0.224134	2.96292	4.03562
TCGA-B2-4099-01A	KIRC	6800	0.242794	3.30276	4.47242
TCGA-B2-4101-01A	KIRC	5812	0.239849	2.89879	4.04632
TCGA-B2-4102-01A	KIRC	5060	0.247233	3.05207	4.28947
TCGA-B5-A0K3-01A	UCEC	6102	0.199279	3.97159	4.95494
TCGA-B5-A11H-01A	UCEC	74029	0.292466	4.22643	4.45055
TCGA-B5-A11I-01A	UCEC	13181	0.207875	4.15153	5.41859
TCGA-B6-A0I1-01A	BRCA	7854	0.193405	3.57507	5.90342
TCGA-B6-A0I2-01A	BRCA	5508	0.228577	3.33842	4.94846
TCGA-B6-A0IJ-01A	BRCA	13826	0.200203	3.1117	4.18895
TCGA-B6-A0IQ-01A	BRCA	5140	0.193969	3.45773	5.31788
TCGA-B6-A0RE-01A	BRCA	9016	0.210736	2.93716	4.34419
TCGA-B6-A0RT-01A	BRCA	1365	0.232234	2.97067	4.70924
TCGA-B6-A0RU-01A	BRCA	4690	0.193817	2.49518	5.07643
TCGA-B6-A0WX-01A	BRCA	3982	0.203415	3.16253	4.04754
TCGA-BA-4076-01A	HNSC	69232	0.17476	3.72137	4.67237
TCGA-BA-4077-01B	HNSC	19322	0.355191	3.51627	5.55762
TCGA-BA-5153-01A	HNSC	4691	0.212748	3.49902	5.71655
TCGA-BA-A4IH-01A	HNSC	4495	0.311012	3.14339	5.32618
TCGA-BG-A18C-01A	UCEC	7010	0.186733	4.60958	4.66818
TCGA-BH-A0AV-01A	BRCA	7053	0.20034	2.79681	5.19613
TCGA-BH-A0B3-01A	BRCA	5061	0.214977	2.57265	5.44467
TCGA-BH-A0B9-01A	BRCA	4132	0.202323	4.34298	5.94708
TCGA-BH-A0BW-01A	BRCA	9985	0.207111	2.67785	5.19263
TCGA-BH-A0DG-01A	BRCA	2278	0.287533	3.3598	4.75766
TCGA-BH-A0DT-01A	BRCA	1546	0.208279	2.96864	4.67942
TCGA-BH-A0E0-01A	BRCA	4525	0.196243	3.72378	4.22527
TCGA-BH-A0EA-01A	BRCA	1975	0.271392	3.24428	4.70011
TCGA-BH-A0H0-01A	BRCA	3708	0.269417	3.20148	6.0378
TCGA-BH-A0H6-01A	BRCA	3062	0.246244	2.79743	4.60015
TCGA-BH-A0WA-01A	BRCA	7085	0.195766	3.11869	5.95045
TCGA-BH-A18R-01A	BRCA	3841	0.215569	4.14576	6.15759
TCGA-BH-A18U-01A	BRCA	7085	0.279323	3.73335	4.99009
TCGA-BH-A1FC-01A	BRCA	6538	0.232793	3.02751	7.02381
TCGA-BJ-A0Z2-01A	THCA	2600	0.242692	3.61235	4.02591
TCGA-BJ-A0ZB-01A	THCA	2692	0.232169	2.91896	4.09997
TCGA-BJ-A191-01A	THCA	3071	0.328232	3.54498	4.30495
TCGA-BJ-A28T-01A	THCA	451	0.27051	3.01507	4.28562
TCGA-BJ-A28V-01A	THCA	2189	0.26085	3.83845	4.8801
TCGA-BK-A0CC-01A	UCEC	7921	0.251862	2.85898	4.55471
TCGA-BK-A139-01A	UCEC	9553	0.173767	3.01185	3.78681
TCGA-BL-A13J-01A	BLCA	10751	0.288624	2.52381	4.80385
TCGA-BP-4781-01A	KIRC	7457	0.230119	3.18777	4.24054
TCGA-BP-4968-01A	KIRC	5332	0.23931	3.59574	4.18023
TCGA-BP-4977-01A	KIRC	3987	0.246551	3.31586	4.51185
TCGA-BP-5010-01A	KIRC	4121	0.213055	3.71447	3.72104
TCGA-BP-5168-01A	KIRC	9990	0.1996	2.93301	4.33092
TCGA-BS-A0TC-01A	UCEC	286066	0.0859592	3.80849	3.76596
TCGA-BS-A0TD-01A	UCEC	4854	0.203337	3.97984	3.69933
TCGA-BS-A0TE-01A	UCEC	38541	0.289977	4.51602	4.99467
TCGA-BS-A0TG-01A	UCEC	5290	0.191682	3.69075	4.45095
TCGA-BS-A0U9-01B	UCEC	5550	0.21045	3.84509	6.11101
TCGA-BS-A0V8-01A	UCEC	8418	0.185198	4.12085	4.36022
TCGA-BT-A20P-01A	BLCA	10001	0.276672	5.59126	5.65478
TCGA-BT-A20Q-01A	BLCA	8931	0.367932	4.20563	4.72808
TCGA-BT-A20T-01A	BLCA	27748	0.423598	4.30086	5.39691
TCGA-BT-A20V-01A	BLCA	9598	0.251823	4.2988	6.29041
TCGA-BT-A2LA-01A	BLCA	14445	0.318934	4.13225	5.26318
TCGA-BT-A3PH-01A	BLCA	38322	0.380852	4.56395	4.89045
TCGA-BT-A3PJ-01A	BLCA	42557	0.43222	3.48671	4.74491
TCGA-C8-A12L-01A	BRCA	9625	0.207065	3.25323	5.4916
TCGA-C8-A12Q-01A	BRCA	10795	0.421491	3.40108	4.32265
TCGA-C8-A130-01A	BRCA	4734	0.234474	3.76977	5.3734
TCGA-CA-6717-01A	CRC	1027245	0.107745	2.87066	5.46826
TCGA-CA-6718-01A	CRC	717991	0.0844217	2.90631	5.55139
TCGA-CF-A27C-01A	BLCA	15324	0.372227	4.16639	4.64461
TCGA-CF-A3MF-01A	BLCA	3748	0.185966	5.17983	4.92685
TCGA-CH-5750-01A	PRAD	3975	0.205535	2.83026	4.18023
TCGA-CH-5763-01A	PRAD	457	0.225383	2.64547	3.8477
TCGA-CH-5771-01A	PRAD	1412	0.224504	3.4665	3.97085
TCGA-CH-5788-01A	PRAD	3871	0.225781	3.62457	4.31513
TCGA-CH-5789-01A	PRAD	724	0.227901	3.07673	3.71831
TCGA-CJ-4639-01A	KIRC	5106	0.238151	3.12978	4.46382
TCGA-CJ-4885-01A	KIRC	6350	0.229921	3.04264	4.15551
TCGA-CJ-4899-01A	KIRC	4224	0.221828	2.8516	4.11086
TCGA-CJ-4918-01A	KIRC	5489	0.238841	2.79056	3.79857
TCGA-CJ-5682-01A	KIRC	8089	0.222154	3.42398	4.43476
TCGA-CJ-6033-01A	KIRC	5598	0.239371	3.59048	3.88
TCGA-CN-4737-01A	HNSC	4569	0.239659	3.53381	4.55109
TCGA-CN-4741-01A	HNSC	12268	0.284235	3.41183	5.37771
TCGA-CN-5365-01A	HNSC	6757	0.247299	3.87863	3.91236
TCGA-CN-5374-01A	HNSC	12423	0.362795	3.42183	5.10936
TCGA-CR-5249-01A	HNSC	3768	0.249469	3.37114	5.03659
TCGA-CR-5250-01A	HNSC	4875	0.286974	3.49838	5.81216
TCGA-CR-6467-01A	HNSC	4847	0.28038	3.96153	7.13772
TCGA-CR-6470-01A	HNSC	3062	0.271065	2.96828	5.69471
TCGA-CR-6472-01A	HNSC	43492	0.369976	3.81967	5.94993
TCGA-CR-6480-01A	HNSC	7505	0.421186	3.94963	5.48877
TCGA-CR-6482-01A	HNSC	3262	0.281729	2.91054	5.59875
TCGA-CR-6487-01A	HNSC	9050	0.327403	3.15267	5.97767
TCGA-CR-7385-01A	HNSC	3008	0.354721	3.63424	5.14062
TCGA-CR-7404-01A	HNSC	7662	0.422866	3.50348	5.6281
TCGA-CS-5395-01A	LGG	6211	0.168572	3.4079	4.65638
TCGA-CS-6668-01A	LGG	3196	0.284418	3.70531	3.88908
TCGA-CS-6669-01A	LGG	601	0.194676	3.33671	3.74631
TCGA-CV-5442-01A	HNSC	25809	0.429346	3.56973	4.27851
TCGA-CV-5443-01A	HNSC	5102	0.248726	3.87519	5.52917
TCGA-CV-6433-01A	HNSC	6586	0.262375	3.38571	5.4439
TCGA-CV-6961-01A	HNSC	40244	0.44019	3.37796	5.28374
TCGA-CV-7090-01A	HNSC	4633	0.254047	2.27023	4.10509
TCGA-CV-7100-01A	HNSC	3371	0.272323	3.46087	5.95417
TCGA-CV-7180-01A	HNSC	5991	0.228009	3.37851	4.76214
TCGA-CV-7255-01A	HNSC	9203	0.264696	3.07108	3.39177
TCGA-CV-7416-01A	HNSC	10129	0.246125	3.37184	4.05961
TCGA-CW-6087-01A	KIRC	2616	0.220183	3.29793	4.61536
TCGA-CW-6093-01A	KIRC	8638	0.230493	2.68661	4.03201
TCGA-CZ-4856-01A	KIRC	5848	0.234097	3.42304	5.02192
TCGA-CZ-5454-01A	KIRC	5391	0.246151	2.81455	3.6227
TCGA-CZ-5987-01A	KIRC	5907	0.245641	3.56291	4.9412
TCGA-D1-A16G-01A	UCEC	4847	0.255209	3.7967	4.69977
TCGA-D1-A17K-01A	UCEC	6374	0.202542	4.03254	4.35628
TCGA-D1-A1NU-01A	UCEC	12295	0.187719	4.53331	5.02139
TCGA-D3-A1Q1-06A	SKCM	7874	0.104394	3.76808	4.66965
TCGA-D3-A1Q5-06A	SKCM	73777	0.246866	3.49185	4.10106
TCGA-D3-A3MO-06A	SKCM	8232	0.212949	3.63981	4.24853
TCGA-D8-A27F-01A	BRCA	10045	0.167148	2.07656	5.12284
TCGA-D8-A27H-01A	BRCA	11613	0.189271	2.1776	4.35502
TCGA-D9-A148-06A	SKCM	46693	0.265415	4.11295	4.1534
TCGA-DA-A1HV-06A	SKCM	278080	0.324777	3.65363	4.71249
TCGA-DA-A1HW-06A	SKCM	57249	0.274782	3.77915	4.81394
TCGA-DA-A1HY-06A	SKCM	123389	0.258629	2.96088	3.976
TCGA-DA-A1I0-06A	SKCM	92910	0.288408	4.12367	4.73069
TCGA-DA-A1I2-06A	SKCM	23877	0.245718	3.72629	4.60928
TCGA-DA-A1I8-06A	SKCM	29261	0.23909	3.61506	3.64339
TCGA-DA-A1IC-06A	SKCM	144778	0.253353	2.86631	4.90492
TCGA-DA-A3F3-06A	SKCM	48023	0.278637	3.2211	4.41772
TCGA-DA-A3F5-06A	SKCM	45203	0.241378	3.77947	4.56882
TCGA-DA-A3F8-06A	SKCM	169375	0.299135	3.57265	4.24329
TCGA-DB-5278-01A	LGG	888	0.221847	3.52319	3.99603
TCGA-DE-A0Y3-01B	THCA	1472	0.252038	2.58159	3.92286
TCGA-DI-A1NN-01A	UCEC	5303	0.205355	3.96541	6.00153
TCGA-DJ-A13W-01A	THCA	1677	0.268336	4.5873	4.74163
TCGA-DJ-A1QL-01A	THCA	1632	0.26348	3.8674	4.59795
TCGA-DJ-A2Q2-01A	THCA	950	0.269474	2.8088	4.93843
TCGA-DJ-A3US-01A	THCA	1148	0.255226	3.19661	3.93017
TCGA-DK-A1A5-01A	BLCA	29392	0.405416	3.67875	5.51039
TCGA-DK-A1A6-01A	BLCA	32000	0.344219	4.06091	5.38312
TCGA-DK-A1AA-01A	BLCA	13177	0.284056	4.08636	5.0555
TCGA-DK-A1AE-01A	BLCA	13902	0.313408	3.69209	5.64287
TCGA-DK-A1AG-01A	BLCA	9680	0.36219	4.56468	5.14102
TCGA-DK-A3IL-01A	BLCA	17159	0.263768	4.26731	5.34149
TCGA-DU-5874-01A	LGG	4517	0.314589	3.95224	4.08398
TCGA-DU-6401-01A	LGG	2127	0.204984	2.73162	3.81404
TCGA-DU-7009-01A	LGG	2199	0.214643	3.55275	4.0291
TCGA-DU-7301-01A	LGG	3511	0.156935	3.01453	4.37893
TCGA-DV-5566-01A	KIRC	6111	0.258223	3.42102	4.59759
TCGA-E1-5318-01A	LGG	3014	0.254811	3.57737	4.11853
TCGA-E1-5319-01A	LGG	2001	0.252874	3.85728	4.01167
TCGA-E2-A109-01A	BRCA	9093	0.196855	3.63946	5.40769
TCGA-E2-A14P-01A	BRCA	8285	0.304888	3.38847	5.30845
TCGA-E2-A14X-01A	BRCA	2769	0.210184	2.57386	5.38498
TCGA-E2-A152-01A	BRCA	11885	0.313504	3.5272	4.96278
TCGA-E2-A156-01A	BRCA	2723	0.24495	3.3781	4.777
TCGA-E2-A15E-01A	BRCA	2857	0.218411	3.80529	4.23036
TCGA-E2-A15H-01A	BRCA	2492	0.221509	4.2245	4.7722
TCGA-E2-A15K-01A	BRCA	4666	0.257394	3.82802	4.84644
TCGA-E2-A1LG-01A	BRCA	11997	0.299908	3.21101	5.66911
TCGA-E2-A1LK-01A	BRCA	6003	0.196235	2.92714	5.40698
TCGA-E2-A1LL-01A	BRCA	6565	0.185377	3.39094	5.68274
TCGA-E6-A1LZ-01A	UCEC	12767	0.248923	5.85616	4.37219
TCGA-E8-A418-01A	THCA	3169	0.300095	3.13914	4.28998
TCGA-E9-A1NH-01A	BRCA	2694	0.235709	3.53767	4.07989
TCGA-EE-A185-06A	SKCM	40488	0.258719	4.30546	5.15157
TCGA-EE-A29B-06A	SKCM	98922	0.259184	3.67333	6.00935
TCGA-EE-A2A0-06A	SKCM	45403	0.240711	2.99077	4.8212
TCGA-EE-A2GN-06A	SKCM	63890	0.285506	3.58892	4.07151
TCGA-EE-A2GT-06A	SKCM	59466	0.26035	2.5787	3.89297
TCGA-EE-A2M5-06A	SKCM	377788	0.260162	3.71962	4.0804
TCGA-EE-A2MI-06A	SKCM	225517	0.293153	2.5967	3.8165
TCGA-EE-A3J5-06A	SKCM	336190	0.241905	3.64962	4.72339
TCGA-EE-A3JI-06A	SKCM	167073	0.267039	2.29396	3.70011
TCGA-EI-6917-01A	CRC	742096	0.183655	2.9824	5.82082
TCGA-EJ-5503-01A	PRAD	540	0.218519	3.36079	4.2394
TCGA-EJ-5506-01A	PRAD	546	0.247253	3.28214	4.26679
TCGA-EJ-7791-01A	PRAD	642	0.216511	3.56267	3.86661
TCGA-EL-A3CV-01A	THCA	732	0.270492	2.32682	3.80323
TCGA-EL-A3CX-01A	THCA	862	0.267981	4.24115	5.3036
TCGA-EL-A3H1-01A	THCA	2471	0.289357	3.68381	4.72563
TCGA-EL-A3MY-01A	THCA	2937	0.243105	2.7615	4.21054
TCGA-EL-A3T0-01A	THCA	738	0.216802	2.89705	4.10919
TCGA-EL-A3TB-01A	THCA	2446	0.217089	3.53506	4.63628
TCGA-EM-A22O-01A	THCA	2479	0.249697	3.24838	4.51115
TCGA-EM-A2CN-01A	THCA	2261	0.262716	3.9259	3.78795
TCGA-EM-A2CP-01A	THCA	728	0.291209	2.83329	4.3617
TCGA-EM-A2OV-01A	THCA	1504	0.242686	3.23955	5.01302
TCGA-EM-A2OW-01A	THCA	985	0.279188	3.09153	4.54418
TCGA-EM-A3AL-01A	THCA	1105	0.267873	3.70598	4.68263
TCGA-EM-A3AQ-01A	THCA	1272	0.245283	3.42237	3.83643
TCGA-EM-A3FQ-01A	THCA	657	0.283105	3.21257	4.02707
TCGA-EM-A3FR-01A	THCA	1191	0.246012	3.37337	4.33013
TCGA-EO-A1Y8-01A	UCEC	7312	0.249179	3.78775	4.71309
TCGA-ER-A19D-06A	SKCM	75307	0.271356	2.86433	4.37698
TCGA-ER-A19E-06A	SKCM	71921	0.242878	2.20883	4.56639
TCGA-ER-A19J-06A	SKCM	47155	0.277277	3.77294	4.62813
TCGA-ER-A19L-06A	SKCM	17655	0.2371	2.83127	3.8802
TCGA-ER-A19T-06A	SKCM	5314	0.13248	3.28969	3.62691
TCGA-ER-A2NF-06A	SKCM	4271	0.177242	3.30859	4.42136
TCGA-ER-A3ES-06A	SKCM	2848	0.146067	3.75382	4.86181
TCGA-ET-A3DV-01A	THCA	1961	0.241713	3.82253	5.02729
TCGA-EW-A1J5-01A	BRCA	39738	0.501837	3.76224	5.48967
TCGA-EW-A1P8-01A	BRCA	4107	0.21232	3.176	5.51806
TCGA-EW-A1PB-01A	BRCA	13828	0.276179	3.3886	4.7666
TCGA-EW-A1PC-01B	BRCA	15888	0.189325	4.02963	4.62714
TCGA-EW-A1PH-01A	BRCA	7253	0.207225	3.55311	4.29308
TCGA-EW-A3U0-01A	BRCA	12111	0.173396	2.8335	4.23481
TCGA-EY-A1GS-01A	UCEC	22036	0.367898	3.57592	4.27836
TCGA-EY-A1GW-01A	UCEC	6722	0.182981	4.11253	3.33928
TCGA-EZ-7264-01A	LGG	2885	0.252686	3.66789	3.99521
TCGA-FD-A3N5-01A	BLCA	35099	0.22824	3.07776	5.41839
TCGA-FD-A3N6-01A	BLCA	15091	0.26983	3.33557	4.28177
TCGA-FE-A233-01A	THCA	570	0.270175	2.61094	3.89191
TCGA-FE-A3PD-01A	THCA	1442	0.322469	3.24869	3.84449
TCGA-FG-5964-01A	LGG	3343	0.240203	3.66448	4.3233
TCGA-FG-8182-01A	LGG	1615	0.223529	3.00342	4.15299
TCGA-FK-A3S3-01A	THCA	1066	0.26454	3.23649	4.47028
TCGA-FK-A3SD-01A	THCA	1407	0.275764	3.47962	5.05502
TCGA-FK-A3SE-01A	THCA	1130	0.224779	2.69488	4.33685
TCGA-FS-A1ZD-06A	SKCM	40900	0.224254	3.0505	4.16936
TCGA-FS-A1ZK-06A	SKCM	206968	0.237259	3.54622	4.58075
TCGA-FS-A1ZP-06A	SKCM	93668	0.332461	3.45325	4.5174
TCGA-FS-A1ZU-06A	SKCM	7586	0.130767	3.46937	4.76474
TCGA-FT-A3EE-01A	BLCA	11606	0.313286	2.75638	4.42854
TCGA-FY-A2QD-01A	THCA	1100	0.260909	2.75446	4.74642
TCGA-G9-6336-01A	PRAD	762	0.238845	3.60075	3.93036
TCGA-G9-6365-01A	PRAD	2235	0.203579	3.18682	4.15372
TCGA-G9-6370-01A	PRAD	1018	0.230845	3.38294	4.21824
TCGA-G9-7522-01A	PRAD	774	0.217054	3.22805	3.78178
TCGA-GD-A2C5-01A	BLCA	18753	0.350984	4.06721	4.88059
TCGA-GI-A2C9-01A	BRCA	10466	0.17103	2.76765	4.37253
TCGA-GM-A2DF-01A	BRCA	1952	0.215164	3.73238	4.66744
TCGA-GM-A3XL-01A	BRCA	8255	0.217202	4.19069	5.37862
TCGA-GN-A262-06A	SKCM	61923	0.250182	4.05381	4.86205
TCGA-GN-A264-06A	SKCM	7815	0.137428	3.66903	4.95634
TCGA-GN-A266-06A	SKCM	639064	0.319394	2.66289	4.27746
TCGA-GN-A26A-06A	SKCM	50649	0.262907	4.56407	4.27128
TCGA-H4-A2HQ-01A	BLCA	43495	0.247776	3.92096	5.36936
TCGA-HC-7075-01A	PRAD	2804	0.224322	3.91207	3.92106
TCGA-HC-7079-01A	PRAD	492	0.262195	2.98623	4.43276
TCGA-HC-7233-01A	PRAD	3251	0.195017	3.55631	3.90285
TCGA-HC-7737-01A	PRAD	945	0.242328	3.53804	3.6837
TCGA-HC-7740-01A	PRAD	951	0.223975	3.3529	3.82059
TCGA-HC-7744-01A	PRAD	3191	0.206518	2.93433	4.48781
TCGA-HC-8258-01A	PRAD	905	0.266298	3.87184	4.01051
TCGA-HI-7169-01A	PRAD	2281	0.199912	3.51488	3.64708
TCGA-HT-7602-01A	LGG	983	0.173957	3.01006	4.02591
TCGA-HT-7689-01A	LGG	2832	0.186794	3.14975	4.5297
TCGA-HT-7695-01A	LGG	1635	0.234862	3.43883	3.76977
TCGA-HW-7486-01A	LGG	1355	0.253875	3.58195	3.80797
TCGA-HW-7487-01A	LGG	3013	0.223365	3.3529	4.18587
TCGA-KL-8323-01A	KICH	4008	0.226547	4.32142	4.89045
TCGA-KL-8325-01A	KICH	3156	0.237643	3.81742	4.55808
TCGA-KL-8341-01A	KICH	4543	0.261061	3.87381	4.26078
TCGA-KL-8342-01A	KICH	2632	0.241261	3.84107	4.70973
TCGA-KM-8440-01A	KICH	4913	0.23163	4.13636	4.89084
TCGA-KN-8418-01A	KICH	3192	0.252193	4.0691	4.85743
TCGA-KN-8424-01A	KICH	3238	0.239036	3.72148	4.72372
TCGA-KN-8429-01A	KICH	2206	0.238441	4.18872	4.72738
TCGA-KN-8434-01A	KICH	3110	0.26045	4.26123	4.82573
TCGA-KN-8435-01A	KICH	5146	0.248154	3.94092	4.31383
TCGA-KO-8406-01A	KICH	3498	0.243854	3.68919	4.29932
TCGA-KO-8407-01A	KICH	2817	0.238197	4.58796	4.53244
TCGA-KO-8411-01A	KICH	4364	0.240834	3.73205	4.31404
TCGA-KO-8416-01A	KICH	3472	0.230415	4.37573	4.86503
TCGA-KO-8417-01A	KICH	2770	0.253069	4.15437	4.87838
TCGA-L6-A4ET-01A	THCA	815	0.255215	3.37657	3.87686

## Sheet: TCGAexome_UDGstat_SMUG1.UNG_exp
sample_id	cancer_type	n_mut_total	UDG_statistic	smug1_log2expression	ung_log2expression	TCGA505_sample
TCGA-02-0047	GBM	NA	NA	9.07755	9.61071	0
TCGA-02-0055	GBM	NA	NA	8.72733	8.89471	0
TCGA-02-2483	GBM	NA	NA	9.48719	10.5592	1
TCGA-02-2485	GBM	NA	NA	8.55532	10.3363	1
TCGA-02-2486	GBM	NA	NA	9.64276	10.1811	0
TCGA-04-1348	OV	NA	NA	10.4343	10.5643	0
TCGA-04-1357	OV	NA	NA	9.50236	9.54698	0
TCGA-04-1362	OV	NA	NA	9.94775	10.6047	0
TCGA-04-1364	OV	NA	NA	9.62872	10.8925	0
TCGA-04-1365	OV	NA	NA	9.90971	11.5882	0
TCGA-04-1514	OV	NA	NA	9.29087	11.2905	0
TCGA-04-1519	OV	NA	NA	9.79778	10.8737	0
TCGA-05-4244	LUAD	207	0.193237	8.57567	9.62752	0
TCGA-05-4249	LUAD	319	0.15674	8.54981	9.94614	0
TCGA-05-4250	LUAD	354	0.186441	9.14473	10.4916	0
TCGA-05-4382	LUAD	1926	0.155763	9.66015	9.12551	0
TCGA-05-4384	LUAD	147	0.244898	9.38434	9.66072	0
TCGA-05-4389	LUAD	281	0.288256	10.4938	10.455	1
TCGA-05-4390	LUAD	555	0.145946	9.91252	10.6293	0
TCGA-05-4395	LUAD	277	0.274368	10.4866	10.5025	1
TCGA-05-4396	LUAD	508	0.104331	10.0579	9.39009	1
TCGA-05-4397	LUAD	836	0.202153	9.90277	10.7159	1
TCGA-05-4398	LUAD	786	0.187023	9.75972	9.95191	1
TCGA-05-4402	LUAD	175	0.365714	9.74435	10.1814	0
TCGA-05-4403	LUAD	136	0.213235	9.37781	9.39638	0
TCGA-05-4405	LUAD	444	0.173423	9.13929	9.43003	0
TCGA-05-4410	LUAD	1184	0.180743	8.90726	9.64054	0
TCGA-05-4415	LUAD	197	0.213198	8.99498	10.376	0
TCGA-05-4417	LUAD	299	0.123746	9.39826	9.7824	0
TCGA-05-4418	LUAD	281	0.220641	9.66291	10.493	0
TCGA-05-4420	LUAD	314	0.181529	10.0476	10.9217	1
TCGA-05-4422	LUAD	52	0.269231	9.43703	10.3082	1
TCGA-05-4424	LUAD	798	0.165414	9.2187	10.8401	0
TCGA-05-4425	LUAD	NA	NA	8.68406	9.84194	0
TCGA-05-4426	LUAD	48	0.25	8.41055	9.8709	0
TCGA-05-4427	LUAD	1080	0.168519	9.26807	9.89798	0
TCGA-05-4430	LUAD	311	0.138264	9.42233	10.2907	0
TCGA-05-4432	LUAD	705	0.190071	10.0651	10.2928	1
TCGA-05-4433	LUAD	39	0.205128	8.88738	8.54517	0
TCGA-05-4434	LUAD	57	0.385965	9.78682	10.0577	0
TCGA-05-5420	LUAD	97	0.206186	10.1709	10.5982	0
TCGA-05-5423	LUAD	156	0.160256	9.84572	9.65701	0
TCGA-05-5425	LUAD	639	0.169014	10.049	10.2338	0
TCGA-05-5428	LUAD	398	0.29397	9.9661	10.0832	0
TCGA-05-5429	LUAD	33	0.212121	9.90307	10.0691	1
TCGA-05-5715	LUAD	126	0.301587	9.71581	9.83654	0
TCGA-06-0125	GBM	NA	NA	8.91524	10.0539	1
TCGA-06-0129	GBM	NA	NA	9.06629	10.3461	0
TCGA-06-0130	GBM	NA	NA	8.7912	9.99816	0
TCGA-06-0132	GBM	NA	NA	9.26915	9.44922	0
TCGA-06-0138	GBM	NA	NA	9.61032	9.89425	0
TCGA-06-0141	GBM	NA	NA	9.19535	10.4276	0
TCGA-06-0157	GBM	NA	NA	8.98604	10.6023	1
TCGA-06-0158	GBM	NA	NA	8.95894	9.80267	0
TCGA-06-0168	GBM	NA	NA	9.26906	10.4922	0
TCGA-06-0174	GBM	NA	NA	9.23269	10.0109	0
TCGA-06-0178	GBM	NA	NA	9.83376	11.0162	0
TCGA-06-0184	GBM	NA	NA	8.83632	9.81292	0
TCGA-06-0187	GBM	NA	NA	8.87978	10.4288	0
TCGA-06-0190	GBM	NA	NA	8.72034	9.90507	1
TCGA-06-0210	GBM	NA	NA	9.24778	9.66311	0
TCGA-06-0219	GBM	NA	NA	10.6512	10.5718	0
TCGA-06-0238	GBM	NA	NA	9.81507	10.1499	0
TCGA-06-0644	GBM	NA	NA	8.65971	9.68027	0
TCGA-06-0645	GBM	NA	NA	8.96955	9.40846	0
TCGA-06-0646	GBM	NA	NA	9.18737	9.94602	0
TCGA-06-0649	GBM	NA	NA	10.0038	9.39037	0
TCGA-06-0686	GBM	NA	NA	9.54057	9.49691	1
TCGA-06-0743	GBM	NA	NA	9.64615	9.94964	0
TCGA-06-0744	GBM	NA	NA	8.96926	10.4705	1
TCGA-06-0745	GBM	NA	NA	10.3085	10.2935	1
TCGA-06-0747	GBM	NA	NA	8.74726	9.669	0
TCGA-06-0749	GBM	NA	NA	9.78598	9.75497	0
TCGA-06-0750	GBM	NA	NA	9.67866	9.96598	0
TCGA-06-0878	GBM	NA	NA	9.05837	10.0938	0
TCGA-06-0882	GBM	NA	NA	9.25847	10.0021	0
TCGA-06-1804	GBM	NA	NA	9.59691	10.1415	0
TCGA-06-2557	GBM	NA	NA	9.08325	9.75399	1
TCGA-06-2558	GBM	NA	NA	9.49529	10.1579	0
TCGA-06-2559	GBM	NA	NA	9.02219	9.96351	0
TCGA-06-2561	GBM	NA	NA	9.83929	10.507	0
TCGA-06-2562	GBM	NA	NA	9.25992	9.89426	0
TCGA-06-2563	GBM	NA	NA	8.50363	9.849	0
TCGA-06-2564	GBM	NA	NA	9.14592	9.82616	0
TCGA-06-2565	GBM	NA	NA	8.58629	9.55483	0
TCGA-06-2567	GBM	NA	NA	9.07171	10.7515	0
TCGA-06-2569	GBM	NA	NA	9.1528	10.4196	0
TCGA-06-2570	GBM	NA	NA	9.11305	9.64035	1
TCGA-06-5408	GBM	NA	NA	9.14434	10.6585	0
TCGA-06-5410	GBM	NA	NA	9.35664	9.77646	0
TCGA-06-5411	GBM	NA	NA	9.41528	9.53382	1
TCGA-06-5412	GBM	NA	NA	9.38883	10.0381	0
TCGA-06-5413	GBM	NA	NA	9.29556	10.7224	0
TCGA-06-5414	GBM	NA	NA	8.80489	9.74481	0
TCGA-06-5415	GBM	NA	NA	9.46246	11.0267	1
TCGA-06-5416	GBM	NA	NA	8.93868	10.1929	0
TCGA-06-5417	GBM	NA	NA	8.41618	9.75891	0
TCGA-06-5418	GBM	NA	NA	9.24782	9.78123	0
TCGA-06-5856	GBM	NA	NA	8.26931	9.95496	0
TCGA-06-5858	GBM	NA	NA	8.83222	9.74065	0
TCGA-06-5859	GBM	NA	NA	9.51005	10.7436	0
TCGA-08-0386	GBM	NA	NA	8.88112	10.292	0
TCGA-09-0364	OV	NA	NA	8.52056	11.9518	0
TCGA-09-0366	OV	NA	NA	9.64	10.9946	0
TCGA-09-0367	OV	NA	NA	9.13688	10.5584	0
TCGA-09-0369	OV	NA	NA	9.2675	11.8002	0
TCGA-09-1662	OV	NA	NA	9.30525	11.1041	0
TCGA-09-1666	OV	NA	NA	9.33632	10.5106	0
TCGA-09-1667	OV	NA	NA	9.40898	10.8266	0
TCGA-09-1668	OV	NA	NA	9.35684	10.8588	0
TCGA-09-1669	OV	NA	NA	9.63821	11.9805	0
TCGA-09-1670	OV	NA	NA	9.26983	11.0624	0
TCGA-09-1673	OV	NA	NA	8.84674	12.314	0
TCGA-09-1674	OV	NA	NA	10.2338	11.4664	0
TCGA-09-2044	OV	NA	NA	8.45908	10.9604	0
TCGA-09-2045	OV	NA	NA	8.90622	10.5633	0
TCGA-09-2048	OV	NA	NA	9.90963	11.3001	0
TCGA-09-2051	OV	NA	NA	9.09959	10.5009	0
TCGA-09-2054	OV	NA	NA	9.58798	11.4234	0
TCGA-09-2056	OV	NA	NA	9.63651	11.1789	0
TCGA-10-0928	OV	NA	NA	8.97485	11.422	0
TCGA-10-0936	OV	NA	NA	10.0426	10.8214	0
TCGA-12-0616	GBM	NA	NA	9.38514	9.76591	0
TCGA-12-0618	GBM	NA	NA	9.31799	9.73923	0
TCGA-12-0619	GBM	NA	NA	8.64517	9.64845	0
TCGA-12-0821	GBM	NA	NA	9.22169	10.0693	0
TCGA-12-1597	GBM	NA	NA	9.78078	10.0128	0
TCGA-12-3650	GBM	NA	NA	9.16828	10.2054	0
TCGA-12-3652	GBM	NA	NA	9.7372	9.98238	0
TCGA-12-3653	GBM	NA	NA	9.1474	10.456	0
TCGA-12-5295	GBM	NA	NA	9.77327	10.3472	0
TCGA-12-5299	GBM	NA	NA	9.07736	10.4045	0
TCGA-13-0730	OV	NA	NA	9.10286	10.8895	0
TCGA-13-0799	OV	NA	NA	9.87901	11.9965	0
TCGA-13-0800	OV	NA	NA	10.7664	11.7009	0
TCGA-13-0801	OV	NA	NA	10.1682	9.99269	0
TCGA-13-0890	OV	NA	NA	9.39574	11.1309	0
TCGA-13-0893	OV	NA	NA	9.35614	10.0585	0
TCGA-13-0897	OV	NA	NA	9.81923	10.7529	0
TCGA-13-0899	OV	NA	NA	10.3437	10.8248	0
TCGA-13-0913	OV	NA	NA	10.1213	9.89121	0
TCGA-13-0916	OV	NA	NA	9.89934	11.7484	0
TCGA-13-0920	OV	NA	NA	9.161	10.5358	0
TCGA-13-0924	OV	NA	NA	9.71962	11.3868	0
TCGA-13-1403	OV	NA	NA	9.44394	9.82684	0
TCGA-13-1405	OV	NA	NA	8.01216	9.79706	0
TCGA-13-1410	OV	NA	NA	8.93311	9.21077	0
TCGA-13-1481	OV	NA	NA	9.26888	10.3329	0
TCGA-13-1497	OV	NA	NA	9.68991	11.3048	0
TCGA-13-1498	OV	NA	NA	9.3753	10.0679	0
TCGA-13-1505	OV	NA	NA	9.30715	10.9882	0
TCGA-13-1506	OV	NA	NA	10.328	11.4826	0
TCGA-13-1507	OV	NA	NA	8.94508	9.67679	0
TCGA-13-1511	OV	NA	NA	8.87063	10.5478	0
TCGA-13-1512	OV	NA	NA	8.32007	10.0267	0
TCGA-13-2060	OV	NA	NA	11.5163	10.488	0
TCGA-14-0781	GBM	NA	NA	9.54717	9.64332	0
TCGA-14-0787	GBM	NA	NA	9.66155	10.753	0
TCGA-14-0789	GBM	NA	NA	8.82919	9.56134	0
TCGA-14-0790	GBM	NA	NA	9.51249	9.97462	0
TCGA-14-0817	GBM	NA	NA	9.0237	10.4575	0
TCGA-14-0871	GBM	NA	NA	7.82551	9.97039	0
TCGA-14-1034	GBM	NA	NA	8.98245	10.7249	1
TCGA-14-1823	GBM	NA	NA	10.2037	10.4127	1
TCGA-14-1825	GBM	NA	NA	9.40356	9.9778	0
TCGA-14-1829	GBM	NA	NA	10.0967	10.2713	0
TCGA-14-2554	GBM	NA	NA	10.2712	10.3947	1
TCGA-15-0742	GBM	NA	NA	9.54161	10.4674	0
TCGA-15-1444	GBM	NA	NA	10.02	9.70729	1
TCGA-16-0846	GBM	NA	NA	9.50966	10.0633	0
TCGA-16-1045	GBM	NA	NA	8.98631	10.7358	0
TCGA-17-Z000	LUAD	148	0.236486	NA	NA	0
TCGA-17-Z001	LUAD	225	0.195556	NA	NA	0
TCGA-17-Z002	LUAD	32	0.28125	NA	NA	0
TCGA-17-Z003	LUAD	297	0.205387	NA	NA	0
TCGA-17-Z004	LUAD	36	0.194444	NA	NA	0
TCGA-17-Z005	LUAD	146	0.205479	NA	NA	0
TCGA-17-Z007	LUAD	95	0.147368	NA	NA	0
TCGA-17-Z009	LUAD	82	0.195122	NA	NA	0
TCGA-17-Z010	LUAD	303	0.168317	NA	NA	0
TCGA-17-Z011	LUAD	124	0.241935	NA	NA	0
TCGA-17-Z013	LUAD	62	0.258065	NA	NA	0
TCGA-17-Z014	LUAD	465	0.191398	NA	NA	0
TCGA-17-Z015	LUAD	519	0.132948	NA	NA	0
TCGA-17-Z016	LUAD	297	0.16835	NA	NA	0
TCGA-17-Z017	LUAD	218	0.165138	NA	NA	0
TCGA-17-Z018	LUAD	254	0.106299	NA	NA	0
TCGA-17-Z019	LUAD	3	0.333333	NA	NA	0
TCGA-17-Z020	LUAD	152	0.322368	NA	NA	0
TCGA-17-Z021	LUAD	269	0.152416	NA	NA	0
TCGA-17-Z022	LUAD	1286	0.181182	NA	NA	0
TCGA-17-Z023	LUAD	416	0.170673	NA	NA	0
TCGA-17-Z025	LUAD	257	0.159533	NA	NA	0
TCGA-17-Z026	LUAD	1144	0.333916	NA	NA	0
TCGA-17-Z027	LUAD	115	0.217391	NA	NA	0
TCGA-17-Z028	LUAD	503	0.208748	NA	NA	0
TCGA-17-Z030	LUAD	602	0.167774	NA	NA	0
TCGA-17-Z031	LUAD	2398	0.123853	NA	NA	0
TCGA-17-Z032	LUAD	160	0.30625	NA	NA	0
TCGA-17-Z033	LUAD	208	0.278846	NA	NA	0
TCGA-17-Z036	LUAD	77	0.272727	NA	NA	0
TCGA-17-Z037	LUAD	146	0.226027	NA	NA	0
TCGA-17-Z041	LUAD	137	0.182482	NA	NA	0
TCGA-17-Z042	LUAD	485	0.156701	NA	NA	0
TCGA-17-Z043	LUAD	212	0.207547	NA	NA	0
TCGA-17-Z044	LUAD	117	0.222222	NA	NA	0
TCGA-17-Z045	LUAD	663	0.134238	NA	NA	0
TCGA-17-Z047	LUAD	35	0.228571	NA	NA	0
TCGA-17-Z048	LUAD	42	0.166667	NA	NA	0
TCGA-17-Z049	LUAD	598	0.175585	NA	NA	0
TCGA-17-Z050	LUAD	241	0.224066	NA	NA	0
TCGA-17-Z051	LUAD	248	0.197581	NA	NA	0
TCGA-17-Z052	LUAD	176	0.130682	NA	NA	0
TCGA-17-Z053	LUAD	372	0.217742	NA	NA	0
TCGA-17-Z054	LUAD	26	0.423077	NA	NA	0
TCGA-17-Z055	LUAD	1102	0.177858	NA	NA	0
TCGA-17-Z056	LUAD	704	0.245739	NA	NA	0
TCGA-17-Z057	LUAD	462	0.266234	NA	NA	0
TCGA-17-Z058	LUAD	310	0.196774	NA	NA	0
TCGA-17-Z059	LUAD	183	0.229508	NA	NA	0
TCGA-17-Z060	LUAD	326	0.196319	NA	NA	0
TCGA-17-Z061	LUAD	200	0.245	NA	NA	0
TCGA-17-Z062	LUAD	509	0.153242	NA	NA	0
TCGA-18-3406	LUSC	NA	NA	9.43817	10.346	0
TCGA-18-3407	LUSC	NA	NA	8.51508	9.80859	0
TCGA-18-3408	LUSC	NA	NA	9.36035	10.4868	1
TCGA-18-3409	LUSC	NA	NA	9.38082	10.2405	0
TCGA-18-3410	LUSC	NA	NA	9.91618	11.3889	0
TCGA-18-3411	LUSC	NA	NA	9.79223	10.7912	0
TCGA-18-3412	LUSC	NA	NA	10.4031	11.4631	0
TCGA-18-3414	LUSC	NA	NA	9.51452	10.4041	0
TCGA-18-3415	LUSC	NA	NA	10.0524	10.2267	1
TCGA-18-3416	LUSC	NA	NA	9.37725	11.0118	0
TCGA-18-3417	LUSC	NA	NA	9.60771	11.0228	0
TCGA-18-3419	LUSC	NA	NA	9.57754	10.6586	0
TCGA-18-3421	LUSC	NA	NA	9.54966	11.3066	0
TCGA-18-4083	LUSC	NA	NA	9.41648	11.5514	0
TCGA-18-4086	LUSC	NA	NA	9.42182	11.054	0
TCGA-18-4721	LUSC	NA	NA	9.49734	11.0929	1
TCGA-18-5592	LUSC	NA	NA	9.76315	10.1836	0
TCGA-18-5595	LUSC	NA	NA	8.52737	11.0747	0
TCGA-19-1390	GBM	NA	NA	8.72284	9.0575	0
TCGA-19-1787	GBM	NA	NA	9.18551	11.1295	0
TCGA-19-2619	GBM	NA	NA	9.0348	10.5262	0
TCGA-19-2620	GBM	NA	NA	8.82722	10.3649	1
TCGA-19-2624	GBM	NA	NA	8.56982	9.48265	1
TCGA-19-2625	GBM	NA	NA	9.86282	10.279	0
TCGA-19-2629	GBM	NA	NA	9.86217	10.1862	1
TCGA-19-4065	GBM	NA	NA	9.26954	9.83324	0
TCGA-19-5960	GBM	NA	NA	8.88344	10.572	1
TCGA-20-1682	OV	NA	NA	8.66583	10.9915	0
TCGA-20-1683	OV	NA	NA	9.01074	10.2424	0
TCGA-20-1684	OV	NA	NA	9.86094	11.2761	0
TCGA-20-1685	OV	NA	NA	9.61358	11.6352	0
TCGA-20-1687	OV	NA	NA	8.96335	9.48084	0
TCGA-21-1070	LUSC	NA	NA	9.63698	10.1903	0
TCGA-21-1071	LUSC	NA	NA	9.28685	10.8619	0
TCGA-21-1072	LUSC	NA	NA	9.2932	10.2961	0
TCGA-21-1075	LUSC	NA	NA	9.51224	10.8985	0
TCGA-21-1077	LUSC	NA	NA	9.53957	10.2553	0
TCGA-21-1078	LUSC	NA	NA	9.56282	10.5336	1
TCGA-21-1079	LUSC	NA	NA	9.54678	10.2489	0
TCGA-21-1080	LUSC	NA	NA	9.29234	10.7232	0
TCGA-21-1081	LUSC	NA	NA	8.64105	10.3898	0
TCGA-21-1082	LUSC	NA	NA	9.4423	11.0885	1
TCGA-21-1083	LUSC	NA	NA	10.088	11.8393	0
TCGA-21-5782	LUSC	NA	NA	9.80293	11.0354	1
TCGA-21-5783	LUSC	NA	NA	8.74509	10.8086	0
TCGA-21-5784	LUSC	NA	NA	9.78175	9.84834	0
TCGA-21-5786	LUSC	NA	NA	9.43492	11.2453	0
TCGA-21-5787	LUSC	NA	NA	8.46381	11.0793	0
TCGA-21-A5DI	LUSC	NA	NA	8.96177	9.97776	0
TCGA-22-0940	LUSC	NA	NA	9.84192	11.4928	0
TCGA-22-0944	LUSC	NA	NA	9.196	10.2444	0
TCGA-22-1000	LUSC	NA	NA	9.20385	10.005	0
TCGA-22-1002	LUSC	NA	NA	9.30432	10.7495	0
TCGA-22-1005	LUSC	NA	NA	9.75913	10.1159	0
TCGA-22-1011	LUSC	NA	NA	8.93445	10.2202	0
TCGA-22-1012	LUSC	NA	NA	9.5638	11.0666	0
TCGA-22-1016	LUSC	NA	NA	9.22901	10.5002	1
TCGA-22-1017	LUSC	NA	NA	9.51066	10.2355	0
TCGA-22-4591	LUSC	NA	NA	9.23382	10.7488	0
TCGA-22-4593	LUSC	NA	NA	9.29025	10.7114	0
TCGA-22-4594	LUSC	NA	NA	10.6559	10.3769	0
TCGA-22-4595	LUSC	NA	NA	9.06173	10.4122	0
TCGA-22-4596	LUSC	NA	NA	8.35503	9.50884	0
TCGA-22-4599	LUSC	NA	NA	9.34308	10.849	0
TCGA-22-4601	LUSC	NA	NA	9.15788	11.2993	0
TCGA-22-4604	LUSC	NA	NA	9.2909	11.178	0
TCGA-22-4605	LUSC	NA	NA	9.45306	10.0891	0
TCGA-22-4607	LUSC	NA	NA	9.50763	11.5763	0
TCGA-22-4609	LUSC	NA	NA	8.76283	10.1719	0
TCGA-22-4613	LUSC	NA	NA	9.58689	10.8384	0
TCGA-22-5471	LUSC	NA	NA	10.7013	11.5957	0
TCGA-22-5472	LUSC	NA	NA	8.75505	10.1602	0
TCGA-22-5473	LUSC	NA	NA	9.16329	10.3095	0
TCGA-22-5474	LUSC	NA	NA	9.31382	10.5261	0
TCGA-22-5477	LUSC	NA	NA	10.4218	11.103	1
TCGA-22-5478	LUSC	NA	NA	9.00955	9.85451	0
TCGA-22-5479	LUSC	NA	NA	8.87952	10.0499	0
TCGA-22-5480	LUSC	NA	NA	9.07627	10.336	0
TCGA-22-5481	LUSC	NA	NA	10.1625	11.4637	0
TCGA-22-5482	LUSC	NA	NA	9.23944	10.5116	0
TCGA-22-5483	LUSC	NA	NA	9.55185	11.0443	0
TCGA-22-5485	LUSC	NA	NA	9.36613	11.1018	0
TCGA-22-5489	LUSC	NA	NA	9.15751	10.418	0
TCGA-22-5491	LUSC	NA	NA	9.82522	11.7299	0
TCGA-22-5492	LUSC	NA	NA	8.98256	10.5364	1
TCGA-22-A5C4	LUSC	NA	NA	9.32472	10.6199	0
TCGA-23-1023	OV	NA	NA	9.00799	10.5818	0
TCGA-23-1026	OV	NA	NA	9.03666	10.2213	0
TCGA-23-1027	OV	NA	NA	9.62687	10.2796	0
TCGA-23-1029	OV	NA	NA	9.61321	10.6638	0
TCGA-23-1109	OV	NA	NA	9.65539	10.4618	0
TCGA-23-1111	OV	NA	NA	8.87614	10.5496	0
TCGA-23-1114	OV	NA	NA	9.81541	10.5344	0
TCGA-23-1120	OV	NA	NA	8.75891	9.83966	0
TCGA-23-1122	OV	NA	NA	9.56078	10.4128	0
TCGA-23-1123	OV	NA	NA	9.88628	10.1955	0
TCGA-23-1809	OV	NA	NA	8.69255	11.8778	0
TCGA-23-2077	OV	NA	NA	9.24746	9.82858	0
TCGA-23-2081	OV	NA	NA	9.49935	10.8194	0
TCGA-23-2084	OV	NA	NA	8.74643	11.4199	0
TCGA-24-0975	OV	NA	NA	9.27891	10.2387	0
TCGA-24-1103	OV	NA	NA	9.09755	10.7813	0
TCGA-24-1413	OV	NA	NA	9.69381	9.98813	0
TCGA-24-1416	OV	NA	NA	8.61933	10.776	0
TCGA-24-1417	OV	NA	NA	9.40675	10.5881	0
TCGA-24-1418	OV	NA	NA	9.4444	10.1523	0
TCGA-24-1419	OV	NA	NA	10.1893	10.8571	0
TCGA-24-1423	OV	NA	NA	9.49387	10.5422	0
TCGA-24-1424	OV	NA	NA	9.63581	11.151	0
TCGA-24-1427	OV	NA	NA	9.18286	11.0197	0
TCGA-24-1428	OV	NA	NA	9.20344	10.7695	0
TCGA-24-1430	OV	NA	NA	9.0778	10.6747	0
TCGA-24-1436	OV	NA	NA	8.2071	9.96852	0
TCGA-24-1467	OV	NA	NA	9.06934	10.5986	0
TCGA-24-1469	OV	NA	NA	10.5556	10.6526	0
TCGA-24-1474	OV	NA	NA	9.23899	11.8384	0
TCGA-24-1544	OV	NA	NA	9.87651	11.2828	0
TCGA-24-1548	OV	NA	NA	9.76858	11.4532	0
TCGA-24-1549	OV	NA	NA	8.82875	11.6581	0
TCGA-24-1550	OV	NA	NA	9.21384	9.94875	0
TCGA-24-1551	OV	NA	NA	8.31551	11.8611	0
TCGA-24-1552	OV	NA	NA	9.11843	10.6244	0
TCGA-24-1553	OV	NA	NA	9.04729	10.429	0
TCGA-24-1555	OV	NA	NA	9.44936	11.0894	0
TCGA-24-1556	OV	NA	NA	9.21075	11.5768	0
TCGA-24-1557	OV	NA	NA	9.64215	11.0054	0
TCGA-24-1558	OV	NA	NA	9.48141	11.3948	0
TCGA-24-1560	OV	NA	NA	9.88767	10.3895	0
TCGA-24-1562	OV	NA	NA	8.36172	11.1048	0
TCGA-24-1563	OV	NA	NA	9.18698	10.4433	0
TCGA-24-1564	OV	NA	NA	9.10621	9.88673	0
TCGA-24-1567	OV	NA	NA	9.89537	10.6315	0
TCGA-24-1603	OV	NA	NA	9.57498	11.7478	0
TCGA-24-1604	OV	NA	NA	8.84862	9.69662	0
TCGA-24-1616	OV	NA	NA	9.47795	11.0765	0
TCGA-24-1842	OV	NA	NA	9.15228	10.4428	0
TCGA-24-1843	OV	NA	NA	10.5002	11.0972	0
TCGA-24-1844	OV	NA	NA	9.26653	11.145	0
TCGA-24-1846	OV	NA	NA	9.78597	11.5485	0
TCGA-24-1847	OV	NA	NA	9.57336	10.2805	0
TCGA-24-1850	OV	NA	NA	9.29362	11.1053	0
TCGA-24-1924	OV	NA	NA	9.52895	10.3928	0
TCGA-24-1930	OV	NA	NA	9.62169	9.5108	0
TCGA-24-2019	OV	NA	NA	10.3357	11.0311	0
TCGA-24-2020	OV	NA	NA	9.8973	11.282	0
TCGA-24-2023	OV	NA	NA	8.01375	9.82374	0
TCGA-24-2024	OV	NA	NA	9.82607	10.9073	0
TCGA-24-2026	OV	NA	NA	8.97748	10.6521	0
TCGA-24-2027	OV	NA	NA	9.65709	10.2749	0
TCGA-24-2033	OV	NA	NA	9.12637	11.2717	0
TCGA-24-2035	OV	NA	NA	9.2072	9.98796	0
TCGA-24-2036	OV	NA	NA	8.06757	12.2635	0
TCGA-24-2038	OV	NA	NA	9.05254	10.8548	0
TCGA-24-2254	OV	NA	NA	8.32418	10.4438	0
TCGA-24-2261	OV	NA	NA	9.47849	11.1032	0
TCGA-24-2262	OV	NA	NA	8.45439	10.6019	0
TCGA-24-2267	OV	NA	NA	9.25805	10.0971	0
TCGA-24-2271	OV	NA	NA	9.17419	9.7686	0
TCGA-24-2281	OV	NA	NA	9.76204	11.1754	0
TCGA-24-2288	OV	NA	NA	9.75927	9.17237	0
TCGA-24-2290	OV	NA	NA	8.9462	10.6677	0
TCGA-24-2297	OV	NA	NA	9.70985	9.47293	0
TCGA-24-2298	OV	NA	NA	9.1164	10.7686	0
TCGA-25-1312	OV	NA	NA	9.33767	10.695	0
TCGA-25-1313	OV	NA	NA	8.30593	9.85224	0
TCGA-25-1314	OV	NA	NA	8.48566	10.0683	0
TCGA-25-1315	OV	NA	NA	9.69154	10.7165	0
TCGA-25-1316	OV	NA	NA	9.12613	10.0913	0
TCGA-25-1317	OV	NA	NA	8.91761	10.5523	0
TCGA-25-1318	OV	NA	NA	9.20045	9.96578	0
TCGA-25-1319	OV	NA	NA	10.7901	10.5893	0
TCGA-25-1321	OV	NA	NA	9.25634	10.3088	0
TCGA-25-1322	OV	NA	NA	9.17977	10.51	0
TCGA-25-1323	OV	NA	NA	9.51834	10.9011	0
TCGA-25-1324	OV	NA	NA	9.90439	12.0246	0
TCGA-25-1326	OV	NA	NA	9.7412	10.275	0
TCGA-25-1328	OV	NA	NA	8.60411	9.92562	0
TCGA-25-1329	OV	NA	NA	9.23984	10.5151	0
TCGA-25-1623	OV	NA	NA	8.65415	10.6155	0
TCGA-25-1625	OV	NA	NA	8.58166	9.58276	0
TCGA-25-1627	OV	NA	NA	9.4401	11.4373	0
TCGA-25-1630	OV	NA	NA	9.15378	11.0533	0
TCGA-25-1631	OV	NA	NA	9.19113	10.7723	0
TCGA-25-1632	OV	NA	NA	9.56303	10.3848	0
TCGA-25-1633	OV	NA	NA	9.53602	10.6766	0
TCGA-25-1634	OV	NA	NA	9.50189	10.7659	0
TCGA-25-1635	OV	NA	NA	9.15692	11.0342	0
TCGA-25-1870	OV	NA	NA	9.71465	10.5252	0
TCGA-25-1871	OV	NA	NA	9.9528	11.6336	0
TCGA-25-2391	OV	NA	NA	9.6846	10.4927	0
TCGA-25-2392	OV	NA	NA	9.14342	11.5008	0
TCGA-25-2393	OV	NA	NA	9.58019	11.5517	0
TCGA-25-2396	OV	NA	NA	9.87049	10.785	0
TCGA-25-2397	OV	NA	NA	8.09333	9.49404	0
TCGA-25-2399	OV	NA	NA	8.74017	10.9296	0
TCGA-25-2400	OV	NA	NA	9.97903	10.5912	0
TCGA-25-2404	OV	NA	NA	9.50625	10.6226	0
TCGA-25-2409	OV	NA	NA	8.89374	10.6609	0
TCGA-26-1442	GBM	NA	NA	9.22983	9.00827	0
TCGA-26-5132	GBM	NA	NA	8.41686	10.2042	1
TCGA-26-5133	GBM	NA	NA	9.72323	10.0607	0
TCGA-26-5134	GBM	NA	NA	9.29243	9.93591	0
TCGA-26-5135	GBM	NA	NA	9.72054	9.19961	1
TCGA-26-5136	GBM	NA	NA	9.15134	9.48166	0
TCGA-26-5139	GBM	NA	NA	8.85659	9.79626	0
TCGA-27-1830	GBM	NA	NA	9.15561	10.016	0
TCGA-27-1831	GBM	NA	NA	9.9287	10.1481	1
TCGA-27-1832	GBM	NA	NA	9.6971	11.0096	0
TCGA-27-1834	GBM	NA	NA	9.08022	9.99114	0
TCGA-27-1835	GBM	NA	NA	9.13603	10.2782	0
TCGA-27-1837	GBM	NA	NA	9.49721	9.47117	0
TCGA-27-2519	GBM	NA	NA	9.51139	10.2528	0
TCGA-27-2521	GBM	NA	NA	9.84053	11.1329	0
TCGA-27-2523	GBM	NA	NA	9.48268	10.0244	1
TCGA-27-2524	GBM	NA	NA	9.60466	10.6229	0
TCGA-27-2526	GBM	NA	NA	9.97869	10.4668	0
TCGA-27-2528	GBM	NA	NA	8.9261	10.2542	1
TCGA-28-1747	GBM	NA	NA	9.26358	10.2474	0
TCGA-28-1753	GBM	NA	NA	8.60785	9.65464	0
TCGA-28-2499	GBM	NA	NA	9.90118	10.474	0
TCGA-28-2509	GBM	NA	NA	8.8054	10.774	0
TCGA-28-2510	GBM	NA	NA	8.9245	9.47019	0
TCGA-28-2513	GBM	NA	NA	9.16509	9.94606	0
TCGA-28-2514	GBM	NA	NA	8.69577	9.38183	0
TCGA-28-5204	GBM	NA	NA	9.10075	10.5404	0
TCGA-28-5207	GBM	NA	NA	9.2144	10.9671	0
TCGA-28-5208	GBM	NA	NA	9.24735	10.3953	0
TCGA-28-5209	GBM	NA	NA	8.48369	10.2223	0
TCGA-28-5213	GBM	NA	NA	9.90763	10.347	0
TCGA-28-5215	GBM	NA	NA	9.11181	9.83727	0
TCGA-28-5216	GBM	NA	NA	9.24484	9.61182	0
TCGA-28-5218	GBM	NA	NA	8.45886	9.96695	0
TCGA-28-5220	GBM	NA	NA	9.45086	10.9077	0
TCGA-29-1688	OV	NA	NA	8.82889	10.7861	0
TCGA-29-1690	OV	NA	NA	9.35199	10.653	0
TCGA-29-1691	OV	NA	NA	9.48633	11.8882	0
TCGA-29-1693	OV	NA	NA	9.35482	10.913	0
TCGA-29-1694	OV	NA	NA	9.32848	9.45471	0
TCGA-29-1695	OV	NA	NA	9.58548	10.5546	0
TCGA-29-1696	OV	NA	NA	9.86752	10.7437	0
TCGA-29-1697	OV	NA	NA	9.69013	11.512	0
TCGA-29-1699	OV	NA	NA	9.78417	10.5805	0
TCGA-29-1701	OV	NA	NA	12.506	10.7979	0
TCGA-29-1702	OV	NA	NA	9.28927	9.90371	0
TCGA-29-1703	OV	NA	NA	9.18156	10.645	0
TCGA-29-1705	OV	NA	NA	9.18231	10.8298	0
TCGA-29-1710	OV	NA	NA	9.26314	9.61657	0
TCGA-29-1711	OV	NA	NA	8.79877	9.99564	0
TCGA-29-1761	OV	NA	NA	10.0183	11.1446	0
TCGA-29-1762	OV	NA	NA	9.92037	11.8178	0
TCGA-29-1763	OV	NA	NA	9.3348	10.5211	0
TCGA-29-1770	OV	NA	NA	8.16672	11.121	0
TCGA-29-1776	OV	NA	NA	9.44514	10.3469	0
TCGA-29-1778	OV	NA	NA	9.52883	10.9452	0
TCGA-29-1781	OV	NA	NA	9.45349	10.4821	0
TCGA-29-1783	OV	NA	NA	9.35653	10.2378	0
TCGA-29-1784	OV	NA	NA	10.0991	11.7448	0
TCGA-29-1785	OV	NA	NA	9.28448	10.9575	0
TCGA-29-2414	OV	NA	NA	10.0235	9.7853	0
TCGA-29-2425	OV	NA	NA	9.58436	10.1578	0
TCGA-29-2427	OV	NA	NA	9.02927	9.9401	0
TCGA-29-2428	OV	NA	NA	10.1566	10.6759	0
TCGA-2A-A8VL	PRAD	21	0.190476	9.12992	9.01256	0
TCGA-2A-A8VO	PRAD	27	0.37037	9.79215	9.20502	0
TCGA-2A-A8VT	PRAD	45	0.111111	8.50476	9.76889	0
TCGA-2A-A8VV	PRAD	19	0.263158	9.33161	9.68832	0
TCGA-2A-A8VX	PRAD	29	0.241379	10.0832	9.68258	0
TCGA-2A-A8W1	PRAD	26	0.192308	9.10606	9.98356	0
TCGA-2A-A8W3	PRAD	33	0.212121	8.69571	10.1585	0
TCGA-2A-AAYF	PRAD	NA	NA	9.74879	9.18467	0
TCGA-2A-AAYO	PRAD	NA	NA	9.91888	9.26099	0
TCGA-2A-AAYU	PRAD	NA	NA	9.22902	9.46155	0
TCGA-2E-A9G8	UCEC	NA	NA	10.3873	11.1381	0
TCGA-2F-A9KO	BLCA	NA	NA	10.0937	10.5409	0
TCGA-2F-A9KP	BLCA	NA	NA	9.55853	10.7881	0
TCGA-2F-A9KQ	BLCA	NA	NA	9.68701	11.302	0
TCGA-2F-A9KR	BLCA	NA	NA	9.94795	10.1912	0
TCGA-2F-A9KT	BLCA	NA	NA	10.0749	10.0628	0
TCGA-2F-A9KW	BLCA	NA	NA	9.83889	9.5352	0
TCGA-2G-AAEW	TGCT	NA	NA	8.8122	12.9299	0
TCGA-2G-AAEX	TGCT	NA	NA	9.30329	12.7935	0
TCGA-2G-AAF1	TGCT	NA	NA	9.46515	12.9656	0
TCGA-2G-AAF4	TGCT	NA	NA	9.90353	12.7657	0
TCGA-2G-AAF6	TGCT	NA	NA	9.24458	11.7061	0
TCGA-2G-AAF8	TGCT	NA	NA	9.71208	12.392	0
TCGA-2G-AAFE	TGCT	NA	NA	9.71717	13.2427	0
TCGA-2G-AAFG	TGCT	NA	NA	9.1485	11.6876	0
TCGA-2G-AAFH	TGCT	NA	NA	9.06763	12.7623	0
TCGA-2G-AAFI	TGCT	NA	NA	9.64071	12.4608	0
TCGA-2G-AAFJ	TGCT	NA	NA	8.97794	10.9506	0
TCGA-2G-AAFL	TGCT	NA	NA	9.61449	11.473	0
TCGA-2G-AAFM	TGCT	NA	NA	9.84988	11.5504	0
TCGA-2G-AAFN	TGCT	NA	NA	9.46356	12.0733	0
TCGA-2G-AAFO	TGCT	NA	NA	9.61335	11.5961	0
TCGA-2G-AAFV	TGCT	NA	NA	10.1226	11.6801	0
TCGA-2G-AAFY	TGCT	NA	NA	9.17073	11.7982	0
TCGA-2G-AAFZ	TGCT	NA	NA	9.73758	11.4279	0
TCGA-2G-AAG0	TGCT	NA	NA	9.2026	12.2047	0
TCGA-2G-AAG3	TGCT	NA	NA	8.68307	12.024	0
TCGA-2G-AAG5	TGCT	NA	NA	9.28139	9.91729	0
TCGA-2G-AAG6	TGCT	NA	NA	8.73529	10.07	0
TCGA-2G-AAG7	TGCT	NA	NA	9.10054	12.1885	0
TCGA-2G-AAG8	TGCT	NA	NA	9.85643	12.0499	0
TCGA-2G-AAG9	TGCT	NA	NA	9.36614	12.5747	0
TCGA-2G-AAGA	TGCT	NA	NA	9.76575	12.3361	0
TCGA-2G-AAGC	TGCT	NA	NA	8.95515	11.8583	0
TCGA-2G-AAGE	TGCT	NA	NA	9.01315	12.2816	0
TCGA-2G-AAGF	TGCT	NA	NA	9.32539	12.0648	0
TCGA-2G-AAGG	TGCT	NA	NA	9.32731	11.0573	0
TCGA-2G-AAGI	TGCT	NA	NA	9.30756	11.2036	0
TCGA-2G-AAGJ	TGCT	NA	NA	9.90599	12.2314	0
TCGA-2G-AAGK	TGCT	NA	NA	9.26783	11.9459	0
TCGA-2G-AAGM	TGCT	NA	NA	9.4397	11.4895	0
TCGA-2G-AAGN	TGCT	NA	NA	9.34917	12.8669	0
TCGA-2G-AAGO	TGCT	NA	NA	9.07707	12.2854	0
TCGA-2G-AAGP	TGCT	NA	NA	9.28787	10.9272	0
TCGA-2G-AAGS	TGCT	NA	NA	8.67935	11.4462	0
TCGA-2G-AAGT	TGCT	NA	NA	9.58717	11.0646	0
TCGA-2G-AAGV	TGCT	NA	NA	9.15453	10.0617	0
TCGA-2G-AAGW	TGCT	NA	NA	9.57037	12.0589	0
TCGA-2G-AAGX	TGCT	NA	NA	8.90217	10.6577	0
TCGA-2G-AAGY	TGCT	NA	NA	9.71309	10.1972	0
TCGA-2G-AAGZ	TGCT	NA	NA	8.96779	11.985	0
TCGA-2G-AAH0	TGCT	NA	NA	8.75023	13.1771	0
TCGA-2G-AAH2	TGCT	NA	NA	9.10471	11.3343	0
TCGA-2G-AAH3	TGCT	NA	NA	9.02587	12.0274	0
TCGA-2G-AAH4	TGCT	NA	NA	9.31931	10.5525	0
TCGA-2G-AAH8	TGCT	NA	NA	8.42903	12.9032	0
TCGA-2G-AAHA	TGCT	NA	NA	8.72156	12.5589	0
TCGA-2G-AAHC	TGCT	NA	NA	8.87293	11.9052	0
TCGA-2G-AAHG	TGCT	NA	NA	9.0651	12.3839	0
TCGA-2G-AAHL	TGCT	NA	NA	9.13975	12.6839	0
TCGA-2G-AAHN	TGCT	NA	NA	9.81308	12.7497	0
TCGA-2G-AAHP	TGCT	NA	NA	10.4754	12.8735	0
TCGA-2G-AAHT	TGCT	NA	NA	9.08806	12.8518	0
TCGA-2G-AAKD	TGCT	NA	NA	9.68206	12.1763	0
TCGA-2G-AAKG	TGCT	NA	NA	9.64121	11.8602	0
TCGA-2G-AAKH	TGCT	NA	NA	9.22223	11.8144	0
TCGA-2G-AAKL	TGCT	NA	NA	9.88021	12.3921	0
TCGA-2G-AAKM	TGCT	NA	NA	9.22102	12.0941	0
TCGA-2G-AAKO	TGCT	NA	NA	8.94616	12.3873	0
TCGA-2G-AAL5	TGCT	NA	NA	9.24754	11.0335	0
TCGA-2G-AAL7	TGCT	NA	NA	9.88093	12.4102	0
TCGA-2G-AALF	TGCT	NA	NA	10.1395	11.2697	0
TCGA-2G-AALG	TGCT	NA	NA	9.96692	10.7048	0
TCGA-2G-AALN	TGCT	NA	NA	9.89088	11.7938	0
TCGA-2G-AALO	TGCT	NA	NA	9.60306	10.353	0
TCGA-2G-AALP	TGCT	NA	NA	10.3835	12.6509	0
TCGA-2G-AALQ	TGCT	NA	NA	9.99269	10.8375	0
TCGA-2G-AALR	TGCT	NA	NA	9.58571	11.3761	0
TCGA-2G-AALS	TGCT	NA	NA	9.76796	11.3659	0
TCGA-2G-AALT	TGCT	NA	NA	9.26516	9.91639	0
TCGA-2G-AALW	TGCT	NA	NA	9.2609	10.1872	0
TCGA-2G-AALX	TGCT	NA	NA	9.20654	9.90758	0
TCGA-2G-AALY	TGCT	NA	NA	9.35562	11.7147	0
TCGA-2G-AALZ	TGCT	NA	NA	9.3465	10.1197	0
TCGA-2G-AAM2	TGCT	NA	NA	9.31334	12.357	0
TCGA-2G-AAM3	TGCT	NA	NA	9.21155	10.1741	0
TCGA-2G-AAM4	TGCT	NA	NA	9.38534	12.5544	0
TCGA-2H-A9GF	ESCA	388	0.275773	NA	NA	0
TCGA-2H-A9GH	ESCA	205	0.214634	NA	NA	0
TCGA-2H-A9GI	ESCA	274	0.193431	NA	NA	0
TCGA-2H-A9GJ	ESCA	185	0.281081	NA	NA	0
TCGA-2H-A9GK	ESCA	314	0.245223	NA	NA	0
TCGA-2H-A9GL	ESCA	277	0.137184	NA	NA	0
TCGA-2H-A9GM	ESCA	190	0.210526	NA	NA	0
TCGA-2H-A9GN	ESCA	176	0.238636	NA	NA	0
TCGA-2H-A9GO	ESCA	222	0.256757	NA	NA	0
TCGA-2H-A9GQ	ESCA	202	0.272277	NA	NA	0
TCGA-2H-A9GR	ESCA	402	0.131841	NA	NA	0
TCGA-2J-AAB1	PAAD	NA	NA	9.41146	9.53518	0
TCGA-2J-AAB4	PAAD	NA	NA	8.77799	9.05296	0
TCGA-2J-AAB6	PAAD	NA	NA	9.56474	9.08554	0
TCGA-2J-AAB8	PAAD	NA	NA	9.51817	8.91927	0
TCGA-2J-AAB9	PAAD	NA	NA	9.21899	9.32646	0
TCGA-2J-AABA	PAAD	NA	NA	8.9117	9.74377	0
TCGA-2J-AABE	PAAD	NA	NA	9.19271	9.44583	0
TCGA-2J-AABF	PAAD	NA	NA	9.3536	9.58489	0
TCGA-2J-AABH	PAAD	NA	NA	8.52027	9.13291	0
TCGA-2J-AABI	PAAD	NA	NA	8.51899	9.45031	0
TCGA-2J-AABK	PAAD	NA	NA	9.61504	9.51262	0
TCGA-2J-AABO	PAAD	NA	NA	9.6229	9.41	0
TCGA-2J-AABP	PAAD	NA	NA	9.15672	9.67129	0
TCGA-2J-AABR	PAAD	NA	NA	8.63536	9.17859	0
TCGA-2J-AABT	PAAD	NA	NA	8.76875	9.14391	0
TCGA-2J-AABU	PAAD	NA	NA	8.84768	9.77224	0
TCGA-2J-AABV	PAAD	NA	NA	9.74793	9.48489	0
TCGA-2K-A9WE	KIRP	NA	NA	9.39978	10.0983	0
TCGA-2L-AAQA	PAAD	221	0.208145	9.65886	9.68659	0
TCGA-2L-AAQE	PAAD	60	0.35	8.72951	9.23127	0
TCGA-2L-AAQI	PAAD	78	0.346154	9.43026	9.33254	0
TCGA-2L-AAQJ	PAAD	136	0.213235	9.414	9.25009	0
TCGA-2L-AAQL	PAAD	92	0.293478	9.94892	9.31107	0
TCGA-2L-AAQM	PAAD	77	0.25974	10.1107	9.51871	0
TCGA-2V-A95S	LIHC	NA	NA	10.3471	9.77967	0
TCGA-2W-A8YY	CESC	NA	NA	9.53484	10.5655	0
TCGA-2X-A9D5	TGCT	NA	NA	8.95325	12.2711	0
TCGA-2X-A9D6	TGCT	NA	NA	8.93668	12.5003	0
TCGA-2Y-A9GS	LIHC	NA	NA	9.24133	9.66223	0
TCGA-2Y-A9GT	LIHC	NA	NA	8.63054	9.20018	0
TCGA-2Y-A9GU	LIHC	NA	NA	9.35491	9.54733	0
TCGA-2Y-A9GV	LIHC	NA	NA	8.84888	9.17873	0
TCGA-2Y-A9GW	LIHC	NA	NA	9.20841	9.90942	0
TCGA-2Y-A9GX	LIHC	NA	NA	8.69328	9.60284	0
TCGA-2Y-A9GY	LIHC	NA	NA	9.90502	10.2189	0
TCGA-2Y-A9GZ	LIHC	NA	NA	9.37243	10.0046	0
TCGA-2Y-A9H0	LIHC	NA	NA	9.32187	11.2241	0
TCGA-2Y-A9H1	LIHC	NA	NA	10.3312	8.79085	0
TCGA-2Y-A9H2	LIHC	NA	NA	8.66303	10.4168	0
TCGA-2Y-A9H3	LIHC	NA	NA	10.7078	9.32517	0
TCGA-2Y-A9H4	LIHC	NA	NA	10.0983	9.81597	0
TCGA-2Y-A9H5	LIHC	NA	NA	9.27432	10.2714	0
TCGA-2Y-A9H6	LIHC	NA	NA	9.08776	9.72589	0
TCGA-2Y-A9H7	LIHC	NA	NA	10.4591	10.5652	0
TCGA-2Y-A9H8	LIHC	NA	NA	9.56833	10.5779	0
TCGA-2Y-A9H9	LIHC	NA	NA	8.96105	9.85502	0
TCGA-2Y-A9HA	LIHC	NA	NA	9.75899	9.8391	0
TCGA-2Y-A9HB	LIHC	NA	NA	8.96858	9.72162	0
TCGA-2Z-A9J1	KIRP	NA	NA	9.90761	10.4891	0
TCGA-2Z-A9J2	KIRP	NA	NA	9.88274	10.1372	0
TCGA-2Z-A9J3	KIRP	NA	NA	9.12435	9.98601	0
TCGA-2Z-A9J5	KIRP	NA	NA	9.83685	10.1383	0
TCGA-2Z-A9J6	KIRP	NA	NA	9.89788	10.4381	0
TCGA-2Z-A9J7	KIRP	NA	NA	10.1449	10.046	0
TCGA-2Z-A9J8	KIRP	NA	NA	9.12911	9.85935	0
TCGA-2Z-A9J9	KIRP	NA	NA	8.93083	9.95005	0
TCGA-2Z-A9JD	KIRP	NA	NA	8.79773	9.64629	0
TCGA-2Z-A9JE	KIRP	NA	NA	9.41328	10.0955	0
TCGA-2Z-A9JG	KIRP	NA	NA	9.82686	10.7115	0
TCGA-2Z-A9JI	KIRP	NA	NA	9.70946	10.1101	0
TCGA-2Z-A9JJ	KIRP	NA	NA	8.59601	9.36122	0
TCGA-2Z-A9JK	KIRP	NA	NA	9.41948	9.52497	0
TCGA-2Z-A9JL	KIRP	NA	NA	9.50315	10.0871	0
TCGA-2Z-A9JM	KIRP	NA	NA	9.93665	10.7056	0
TCGA-2Z-A9JN	KIRP	NA	NA	9.11023	10.4293	0
TCGA-2Z-A9JO	KIRP	NA	NA	9.38016	11.3085	0
TCGA-2Z-A9JP	KIRP	NA	NA	9.85711	9.77856	0
TCGA-2Z-A9JQ	KIRP	NA	NA	10.4265	9.34069	0
TCGA-2Z-A9JR	KIRP	NA	NA	9.10434	9.70698	0
TCGA-2Z-A9JS	KIRP	NA	NA	8.78564	10.048	0
TCGA-2Z-A9JT	KIRP	NA	NA	11.0084	10.3379	0
TCGA-30-1718	OV	NA	NA	8.88991	10.6404	0
TCGA-30-1855	OV	NA	NA	8.53545	10.6235	0
TCGA-30-1860	OV	NA	NA	9.55174	10.4569	0
TCGA-30-1862	OV	NA	NA	8.62228	10.0332	0
TCGA-30-1891	OV	NA	NA	9.03335	10.0966	0
TCGA-31-1944	OV	NA	NA	9.09464	10.2438	0
TCGA-31-1950	OV	NA	NA	10.8414	10.8144	0
TCGA-31-1951	OV	NA	NA	8.87198	10.2684	0
TCGA-31-1953	OV	NA	NA	7.93849	10.4103	0
TCGA-31-1956	OV	NA	NA	8.62403	10.143	0
TCGA-32-1970	GBM	NA	NA	9.35264	10.3054	1
TCGA-32-1980	GBM	NA	NA	9.10514	10.0947	0
TCGA-32-1982	GBM	NA	NA	9.00011	9.79311	0
TCGA-32-2615	GBM	NA	NA	8.76913	10.4499	0
TCGA-32-2616	GBM	NA	NA	9.3207	10.4143	0
TCGA-32-2632	GBM	NA	NA	9.09569	10.3478	0
TCGA-32-2634	GBM	NA	NA	9.30181	10.8451	0
TCGA-32-2638	GBM	NA	NA	8.94522	9.70954	0
TCGA-32-4213	GBM	NA	NA	9.47267	9.89125	0
TCGA-32-5222	GBM	NA	NA	9.27825	9.85971	0
TCGA-33-4532	LUSC	NA	NA	9.66148	11.607	0
TCGA-33-4533	LUSC	NA	NA	8.71148	10.0641	0
TCGA-33-4538	LUSC	NA	NA	9.80658	11.057	0
TCGA-33-4547	LUSC	NA	NA	9.56453	10.6672	0
TCGA-33-4566	LUSC	NA	NA	9.34385	10.3201	0
TCGA-33-4579	LUSC	NA	NA	8.8596	11.491	0
TCGA-33-4582	LUSC	NA	NA	10.3356	11.4522	0
TCGA-33-4583	LUSC	NA	NA	9.83344	10.8817	0
TCGA-33-4586	LUSC	NA	NA	9.92036	10.9799	1
TCGA-33-4587	LUSC	NA	NA	9.3977	11.4271	0
TCGA-33-4589	LUSC	NA	NA	10.4024	10.6757	0
TCGA-33-6737	LUSC	NA	NA	9.90357	9.77301	0
TCGA-33-6738	LUSC	NA	NA	9.58646	10.4124	0
TCGA-33-A4WN	LUSC	NA	NA	9.54767	10.9416	0
TCGA-33-A5GW	LUSC	NA	NA	9.89122	10.1047	0
TCGA-33-AAS8	LUSC	NA	NA	10.3789	10.7881	0
TCGA-33-AASB	LUSC	NA	NA	9.98492	10.0618	0
TCGA-33-AASD	LUSC	NA	NA	8.95409	10.3348	0
TCGA-33-AASI	LUSC	NA	NA	9.92896	10.9664	0
TCGA-33-AASJ	LUSC	NA	NA	9.6146	11.0921	0
TCGA-33-AASL	LUSC	NA	NA	10.067	10.3737	0
TCGA-34-2596	LUSC	NA	NA	9.48059	11.0883	1
TCGA-34-2600	LUSC	NA	NA	9.91905	11.0596	1
TCGA-34-2608	LUSC	NA	NA	9.28295	9.92964	0
TCGA-34-5231	LUSC	NA	NA	9.56019	11.4089	0
TCGA-34-5232	LUSC	NA	NA	9.62177	9.66577	0
TCGA-34-5234	LUSC	NA	NA	10.6582	9.64533	0
TCGA-34-5236	LUSC	NA	NA	9.16552	10.0144	0
TCGA-34-5239	LUSC	NA	NA	9.45217	10.5959	0
TCGA-34-5240	LUSC	NA	NA	10.1258	10.5277	1
TCGA-34-5241	LUSC	NA	NA	8.92313	11.0529	0
TCGA-34-5927	LUSC	NA	NA	9.47718	11.2229	0
TCGA-34-5928	LUSC	NA	NA	8.78488	9.94866	0
TCGA-34-5929	LUSC	NA	NA	9.61498	11.0721	0
TCGA-34-7107	LUSC	NA	NA	9.37565	11.1509	0
TCGA-34-8454	LUSC	NA	NA	9.30876	10.7558	0
TCGA-34-8455	LUSC	NA	NA	9.01072	10.247	0
TCGA-34-8456	LUSC	NA	NA	9.5853	10.427	0
TCGA-34-A5IX	LUSC	NA	NA	8.96903	9.94862	0
TCGA-35-3615	LUAD	145	0.310345	8.69655	8.96766	0
TCGA-35-4122	LUAD	360	0.227778	10.2155	10.9791	0
TCGA-35-4123	LUAD	319	0.166144	9.603	10.0911	0
TCGA-35-5375	LUAD	420	0.169048	10.0437	11.0445	0
TCGA-36-1568	OV	NA	NA	9.26456	10.7228	0
TCGA-36-1570	OV	NA	NA	9.31769	10.7254	0
TCGA-36-1571	OV	NA	NA	8.98412	11.0304	0
TCGA-36-1574	OV	NA	NA	9.31623	11.6978	0
TCGA-36-1575	OV	NA	NA	9.23116	11.1533	0
TCGA-36-1577	OV	NA	NA	9.58985	11.6757	0
TCGA-36-1578	OV	NA	NA	9.14193	10.1503	0
TCGA-36-1580	OV	NA	NA	9.28695	10.6987	0
TCGA-36-1581	OV	NA	NA	9.15738	9.88599	0
TCGA-37-3783	LUSC	NA	NA	10.5421	10.3657	0
TCGA-37-3789	LUSC	NA	NA	10.3325	10.4428	0
TCGA-37-3792	LUSC	NA	NA	9.33986	11.2439	0
TCGA-37-4129	LUSC	NA	NA	9.18706	8.90161	0
TCGA-37-4130	LUSC	NA	NA	10.9236	10.0953	0
TCGA-37-4132	LUSC	NA	NA	10.1429	11.1084	0
TCGA-37-4133	LUSC	NA	NA	10.0113	11.3321	0
TCGA-37-4135	LUSC	NA	NA	10.3571	11.2969	1
TCGA-37-4141	LUSC	NA	NA	9.03518	10.4115	0
TCGA-37-5819	LUSC	NA	NA	10.6745	11.0117	0
TCGA-37-A5EL	LUSC	NA	NA	9.73801	10.6143	0
TCGA-37-A5EM	LUSC	NA	NA	9.09227	9.70856	0
TCGA-37-A5EN	LUSC	NA	NA	10.1781	10.2408	0
TCGA-38-4625	LUAD	594	0.208754	8.45022	10.4912	0
TCGA-38-4626	LUAD	314	0.143312	8.57183	8.6141	0
TCGA-38-4627	LUAD	32	0.3125	9.44087	9.52043	0
TCGA-38-4628	LUAD	140	0.257143	11.2459	10.0768	0
TCGA-38-4629	LUAD	287	0.243902	9.18917	10.2577	0
TCGA-38-4630	LUAD	139	0.258993	10.4022	10.9656	1
TCGA-38-4631	LUAD	758	0.122691	10.7144	11.4247	0
TCGA-38-4632	LUAD	539	0.172542	9.41704	9.97595	0
TCGA-38-6178	LUAD	77	0.285714	8.92237	9.39649	0
TCGA-38-7271	LUAD	121	0.214876	8.92242	9.39391	0
TCGA-38-A44F	LUAD	18	0.333333	9.26112	9.37463	0
TCGA-39-5011	LUSC	NA	NA	9.69925	10.684	0
TCGA-39-5016	LUSC	NA	NA	9.14484	10.3849	0
TCGA-39-5019	LUSC	NA	NA	10.0572	11.2085	0
TCGA-39-5021	LUSC	NA	NA	9.55349	10.779	0
TCGA-39-5022	LUSC	NA	NA	9.61921	10.2043	0
TCGA-39-5024	LUSC	NA	NA	9.54842	10.4344	0
TCGA-39-5027	LUSC	NA	NA	10.0066	10.9315	0
TCGA-39-5028	LUSC	NA	NA	8.73958	10.0752	0
TCGA-39-5029	LUSC	NA	NA	9.21713	10.6591	0
TCGA-39-5030	LUSC	NA	NA	9.12192	10.4882	0
TCGA-39-5031	LUSC	NA	NA	9.2303	11.1578	0
TCGA-39-5034	LUSC	NA	NA	9.54959	9.96924	0
TCGA-39-5035	LUSC	NA	NA	8.77706	10.633	0
TCGA-39-5036	LUSC	NA	NA	10.5366	11.3535	0
TCGA-39-5037	LUSC	NA	NA	10.7409	11.3997	0
TCGA-39-5039	LUSC	NA	NA	9.28577	9.66309	0
TCGA-39-5040	LUSC	NA	NA	9.43163	10.5561	0
TCGA-3A-A9I5	PAAD	68	0.323529	10.6846	8.84293	0
TCGA-3A-A9I7	PAAD	58	0.275862	9.27423	9.25939	0
TCGA-3A-A9I9	PAAD	103	0.23301	9.65809	9.54993	0
TCGA-3A-A9IB	PAAD	79	0.202532	9.24764	9.58631	0
TCGA-3A-A9IC	PAAD	66	0.363636	8.82914	9.02374	0
TCGA-3A-A9IH	PAAD	97	0.278351	9.18568	9.55442	0
TCGA-3A-A9IJ	PAAD	84	0.27381	9.40007	9.0696	0
TCGA-3A-A9IL	PAAD	16	0.25	9.16557	8.96965	0
TCGA-3A-A9IN	PAAD	81	0.296296	8.96745	8.94227	0
TCGA-3A-A9IO	PAAD	51	0.411765	9.10832	9.22764	0
TCGA-3A-A9IR	PAAD	38	0.289474	8.63153	9.19801	0
TCGA-3A-A9IS	PAAD	73	0.410959	8.71827	9.41547	0
TCGA-3A-A9IU	PAAD	84	0.309524	9.4328	9.69078	0
TCGA-3A-A9IV	PAAD	NA	NA	9.22063	9.49313	0
TCGA-3A-A9IX	PAAD	NA	NA	8.85643	9.22365	0
TCGA-3A-A9IZ	PAAD	NA	NA	9.35047	9.47628	0
TCGA-3A-A9J0	PAAD	NA	NA	8.91657	9.2663	0
TCGA-3B-A9HI	SARC	NA	NA	9.06387	8.82828	0
TCGA-3B-A9HJ	SARC	NA	NA	8.96663	9.54822	0
TCGA-3B-A9HL	SARC	NA	NA	8.44831	9.46312	0
TCGA-3B-A9HO	SARC	NA	NA	9.15501	8.98768	0
TCGA-3B-A9HP	SARC	NA	NA	9.24758	9.29172	0
TCGA-3B-A9HQ	SARC	NA	NA	8.67611	8.54487	0
TCGA-3B-A9HR	SARC	NA	NA	8.27574	9.53732	0
TCGA-3B-A9HS	SARC	NA	NA	9.831	9.28271	0
TCGA-3B-A9HT	SARC	NA	NA	9.00296	9.82054	0
TCGA-3B-A9HU	SARC	NA	NA	8.65519	8.9676	0
TCGA-3B-A9HV	SARC	NA	NA	9.1314	9.93803	0
TCGA-3B-A9HX	SARC	NA	NA	9.15454	8.5625	0
TCGA-3B-A9HY	SARC	NA	NA	8.7114	9.24859	0
TCGA-3B-A9HZ	SARC	NA	NA	8.63072	7.88031	0
TCGA-3B-A9I0	SARC	NA	NA	9.67369	9.17748	0
TCGA-3B-A9I1	SARC	NA	NA	9.10476	10.2754	0
TCGA-3B-A9I3	SARC	NA	NA	8.98012	9.22421	0
TCGA-3C-AAAU	BRCA	NA	NA	8.70403	9.77839	0
TCGA-3C-AALI	BRCA	NA	NA	9.70039	10.0941	0
TCGA-3C-AALJ	BRCA	NA	NA	9.66108	9.95396	0
TCGA-3C-AALK	BRCA	NA	NA	9.66489	9.44874	0
TCGA-3E-AAAY	PAAD	51	0.176471	9.30129	9.34197	0
TCGA-3E-AAAZ	PAAD	73	0.356164	9.35743	9.60267	0
TCGA-3G-AB0O	THYM	NA	NA	9.14564	10.1676	0
TCGA-3G-AB0Q	THYM	NA	NA	9.12212	10.178	0
TCGA-3G-AB0T	THYM	NA	NA	9.87681	10.1685	0
TCGA-3G-AB14	THYM	NA	NA	9.74593	10.7076	0
TCGA-3G-AB19	THYM	NA	NA	8.64685	10.0014	0
TCGA-3H-AB3K	MESO	NA	NA	9.42201	9.41687	0
TCGA-3H-AB3L	MESO	NA	NA	9.24815	10.5906	0
TCGA-3H-AB3M	MESO	NA	NA	9.3059	10.2435	0
TCGA-3H-AB3O	MESO	NA	NA	9.06835	9.53893	0
TCGA-3H-AB3S	MESO	NA	NA	9.34442	10.0446	0
TCGA-3H-AB3T	MESO	NA	NA	8.66392	9.96528	0
TCGA-3H-AB3U	MESO	NA	NA	9.3553	10.7064	0
TCGA-3H-AB3X	MESO	NA	NA	9.37533	10.6451	0
TCGA-3K-AAZ8	LIHC	NA	NA	9.34187	9.63058	0
TCGA-3L-AA1B	COAD	NA	NA	9.22672	10.3843	0
TCGA-3Q-A9WF	THYM	NA	NA	9.14239	9.93714	0
TCGA-3R-A8YX	SARC	NA	NA	7.96035	9.94758	0
TCGA-3S-A8YW	THYM	NA	NA	11.3614	11.7291	0
TCGA-3S-AAYX	THYM	NA	NA	9.4124	10.2431	0
TCGA-3T-AA9L	THYM	NA	NA	9.38492	10.471	0
TCGA-3U-A98D	MESO	NA	NA	9.40263	10.2987	0
TCGA-3U-A98E	MESO	NA	NA	9.24478	9.2486	0
TCGA-3U-A98F	MESO	NA	NA	9.46347	9.38139	0
TCGA-3U-A98G	MESO	NA	NA	8.81589	8.76651	0
TCGA-3U-A98H	MESO	NA	NA	8.88827	9.83366	0
TCGA-3U-A98I	MESO	NA	NA	8.36146	10.0613	0
TCGA-3U-A98J	MESO	NA	NA	9.03087	10.1191	0
TCGA-3X-AAV9	CHOL	76	0.263158	9.83001	10.0805	0
TCGA-3X-AAVA	CHOL	53	0.188679	9.34449	10.1484	0
TCGA-3X-AAVB	CHOL	54	0.240741	8.97086	8.91383	0
TCGA-3X-AAVC	CHOL	74	0.337838	9.44296	10.05	0
TCGA-3X-AAVE	CHOL	59	0.237288	8.9555	9.78773	0
TCGA-3Z-A93Z	KIRC	NA	NA	9.1914	9.71523	0
TCGA-41-2571	GBM	NA	NA	9.00074	9.70348	0
TCGA-41-2572	GBM	NA	NA	9.21657	9.98862	0
TCGA-41-3915	GBM	NA	NA	9.05604	9.97242	0
TCGA-41-4097	GBM	NA	NA	8.96024	10.3264	0
TCGA-41-5651	GBM	NA	NA	8.86685	10.598	1
TCGA-43-2576	LUSC	NA	NA	10.1577	9.72804	0
TCGA-43-2578	LUSC	NA	NA	9.85163	11.3083	0
TCGA-43-2581	LUSC	NA	NA	8.81712	9.60744	0
TCGA-43-3394	LUSC	NA	NA	9.95985	10.8927	1
TCGA-43-3920	LUSC	NA	NA	9.66009	9.77368	1
TCGA-43-5668	LUSC	NA	NA	8.39794	10.006	0
TCGA-43-5670	LUSC	NA	NA	10.4875	9.74847	1
TCGA-43-6143	LUSC	NA	NA	9.36519	10.6974	0
TCGA-43-6647	LUSC	NA	NA	8.40612	9.59538	0
TCGA-43-6770	LUSC	NA	NA	9.0575	10.5071	0
TCGA-43-6771	LUSC	NA	NA	9.32058	10.0332	0
TCGA-43-6773	LUSC	NA	NA	9.37726	10.4782	0
TCGA-43-7656	LUSC	NA	NA	9.43862	10.9891	0
TCGA-43-7657	LUSC	NA	NA	9.06401	11.2019	0
TCGA-43-7658	LUSC	NA	NA	9.95439	11.4303	0
TCGA-43-8115	LUSC	NA	NA	8.95563	10.3646	0
TCGA-43-8116	LUSC	NA	NA	10.0471	11.2326	0
TCGA-43-8118	LUSC	NA	NA	9.13748	10.9018	0
TCGA-43-A474	LUSC	NA	NA	9.44813	9.99778	0
TCGA-43-A475	LUSC	NA	NA	9.03092	11.0238	0
TCGA-43-A56U	LUSC	NA	NA	8.6157	9.98672	0
TCGA-43-A56V	LUSC	NA	NA	9.31559	10.1579	0
TCGA-44-2655	LUAD	230	0.156522	9.94831	9.97528	0
TCGA-44-2656	LUAD	999	0.172172	9.23123	9.67317	0
TCGA-44-2657	LUAD	434	0.170507	8.88412	9.22559	0
TCGA-44-2659	LUAD	458	0.155022	9.04961	8.76956	1
TCGA-44-2661	LUAD	60	0.35	9.55674	8.85641	0
TCGA-44-2662	LUAD	260	0.319231	9.23154	9.89532	0
TCGA-44-2665	LUAD	81	0.296296	9.48732	9.63579	1
TCGA-44-2666	LUAD	66	0.272727	7.68376	10.1962	1
TCGA-44-2668	LUAD	437	0.180778	9.419	9.79689	0
TCGA-44-3396	LUAD	223	0.278027	9.84251	9.77705	0
TCGA-44-3398	LUAD	245	0.261224	9.05967	9.56121	0
TCGA-44-3918	LUAD	994	0.157948	9.65918	9.59731	0
TCGA-44-3919	LUAD	150	0.373333	9.28179	10.16	0
TCGA-44-4112	LUAD	471	0.140127	9.37908	9.89392	0
TCGA-44-5643	LUAD	139	0.223022	9.61926	11.4714	0
TCGA-44-5644	LUAD	970	0.140206	10.3017	10.0847	0
TCGA-44-5645	LUAD	36	0.25	8.89887	9.15553	0
TCGA-44-6144	LUAD	222	0.171171	NA	NA	0
TCGA-44-6145	LUAD	328	0.106707	8.87067	9.80596	0
TCGA-44-6146	LUAD	44	0.318182	9.3298	9.05049	0
TCGA-44-6147	LUAD	211	0.184834	8.23144	9.27663	0
TCGA-44-6148	LUAD	10	0.1	8.54655	9.24922	1
TCGA-44-6774	LUAD	311	0.131833	8.91113	8.92223	0
TCGA-44-6775	LUAD	79	0.35443	8.63948	9.35585	0
TCGA-44-6776	LUAD	209	0.172249	9.33822	8.55901	0
TCGA-44-6777	LUAD	403	0.225806	8.24567	8.94515	0
TCGA-44-6778	LUAD	389	0.174807	8.63605	10.0162	0
TCGA-44-6779	LUAD	105	0.247619	9.53058	9.51495	0
TCGA-44-7659	LUAD	156	0.205128	8.86532	9.27863	0
TCGA-44-7660	LUAD	399	0.152882	10.2695	10.7669	0
TCGA-44-7661	LUAD	295	0.210169	8.86599	9.89325	0
TCGA-44-7662	LUAD	589	0.169779	8.92123	9.42839	0
TCGA-44-7667	LUAD	466	0.145923	9.95248	11.6762	0
TCGA-44-7669	LUAD	453	0.163355	9.42218	10.969	0
TCGA-44-7670	LUAD	1093	0.177493	10.9527	10.2174	0
TCGA-44-7671	LUAD	234	0.188034	8.57699	8.88552	0
TCGA-44-7672	LUAD	168	0.14881	9.43038	9.48486	0
TCGA-44-8117	LUAD	772	0.139896	9.22485	9.28224	0
TCGA-44-8119	LUAD	646	0.154799	9.66111	10.1809	0
TCGA-44-8120	LUAD	615	0.157724	8.75023	8.98544	0
TCGA-44-A479	LUAD	298	0.16443	9.84278	9.59853	0
TCGA-44-A47A	LUAD	221	0.257919	9.56105	9.1795	0
TCGA-44-A47B	LUAD	49	0.22449	9.80391	9.8389	0
TCGA-44-A47F	LUAD	92	0.347826	NA	NA	0
TCGA-44-A47G	LUAD	78	0.25641	8.95913	8.84823	0
TCGA-44-A4SS	LUAD	480	0.1875	10.3588	9.56224	0
TCGA-44-A4SU	LUAD	156	0.25641	8.96866	9.12242	0
TCGA-46-3765	LUSC	NA	NA	9.64386	10.5428	0
TCGA-46-3766	LUSC	NA	NA	9.28344	9.71954	0
TCGA-46-3767	LUSC	NA	NA	9.15989	10.0945	0
TCGA-46-3768	LUSC	NA	NA	9.6601	11.3408	0
TCGA-46-3769	LUSC	NA	NA	10.497	9.95301	0
TCGA-46-6025	LUSC	NA	NA	9.30594	10.492	0
TCGA-46-6026	LUSC	NA	NA	9.6455	10.881	0
TCGA-49-4486	LUAD	278	0.374101	10.2841	9.66818	1
TCGA-49-4487	LUAD	409	0.168704	9.02648	10.2713	0
TCGA-49-4488	LUAD	313	0.140575	9.39111	9.55066	0
TCGA-49-4490	LUAD	68	0.367647	9.67782	9.15261	0
TCGA-49-4494	LUAD	201	0.174129	10.4662	10.3191	0
TCGA-49-4501	LUAD	74	0.283784	9.57606	9.4022	0
TCGA-49-4505	LUAD	221	0.162896	10.1388	9.80263	0
TCGA-49-4506	LUAD	137	0.167883	10.2637	9.14647	0
TCGA-49-4507	LUAD	217	0.184332	12.1896	10.249	0
TCGA-49-4510	LUAD	54	0.148148	11.3706	8.39594	1
TCGA-49-4512	LUAD	48	0.229167	9.3483	9.6246	1
TCGA-49-4514	LUAD	346	0.260116	10.8073	10.891	0
TCGA-49-6742	LUAD	309	0.33657	10.1877	10.2658	1
TCGA-49-6743	LUAD	814	0.272727	9.26388	9.38707	0
TCGA-49-6744	LUAD	279	0.143369	9.28477	9.37493	0
TCGA-49-6745	LUAD	150	0.433333	8.6806	9.59519	0
TCGA-49-6761	LUAD	185	0.318919	8.83782	9.59818	0
TCGA-49-6767	LUAD	499	0.154309	10.1461	10.5479	0
TCGA-49-AAQV	LUAD	NA	NA	9.23738	9.55239	0
TCGA-49-AAR0	LUAD	NA	NA	9.82226	9.20696	0
TCGA-49-AAR2	LUAD	NA	NA	10.7856	9.55048	0
TCGA-49-AAR3	LUAD	NA	NA	9.12281	10.2261	0
TCGA-49-AAR4	LUAD	NA	NA	9.55499	9.13712	0
TCGA-49-AAR9	LUAD	NA	NA	10.3409	10.9979	0
TCGA-49-AARE	LUAD	NA	NA	9.95788	10.4238	0
TCGA-49-AARN	LUAD	NA	NA	9.62762	9.0796	0
TCGA-49-AARO	LUAD	NA	NA	10.0128	9.69131	0
TCGA-49-AARQ	LUAD	NA	NA	9.48101	9.60275	0
TCGA-49-AARR	LUAD	NA	NA	8.80082	8.40002	0
TCGA-4A-A93W	KIRP	NA	NA	9.63538	9.6951	0
TCGA-4A-A93X	KIRP	NA	NA	9.57473	10.471	0
TCGA-4A-A93Y	KIRP	NA	NA	9.1061	9.55104	0
TCGA-4B-A93V	LUAD	NA	NA	9.53125	9.6053	0
TCGA-4C-A93U	THCA	NA	NA	8.8467	8.94047	0
TCGA-4E-A92E	UCEC	NA	NA	9.15859	9.63579	0
TCGA-4G-AAZO	CHOL	141	0.12766	8.77526	8.81708	0
TCGA-4G-AAZT	CHOL	43	0.255814	9.80187	9.9332	0
TCGA-4H-AAAK	BRCA	NA	NA	9.24105	10.066	0
TCGA-4J-AA1J	CESC	NA	NA	9.30912	10.2256	0
TCGA-4K-AA1G	TGCT	NA	NA	8.86502	12.895	0
TCGA-4K-AA1H	TGCT	NA	NA	8.92671	12.0683	0
TCGA-4K-AA1I	TGCT	NA	NA	9.26329	11.6468	0
TCGA-4K-AAAL	TGCT	NA	NA	9.87741	13.1042	0
TCGA-4L-AA1F	PRAD	NA	NA	8.82064	9.61291	0
TCGA-4N-A93T	COAD	NA	NA	9.26761	10.1454	0
TCGA-4P-AA8J	HNSC	NA	NA	9.61897	10.1888	0
TCGA-4R-AA8I	LIHC	NA	NA	9.95484	9.63541	0
TCGA-4T-AA8H	COAD	NA	NA	8.79137	10.4308	0
TCGA-4V-A9QI	THYM	NA	NA	9.58738	10.727	0
TCGA-4V-A9QJ	THYM	NA	NA	9.8687	11.0819	0
TCGA-4V-A9QL	THYM	NA	NA	9.15034	10.3312	0
TCGA-4V-A9QM	THYM	NA	NA	8.90788	10.3567	0
TCGA-4V-A9QN	THYM	NA	NA	10.1682	11.013	0
TCGA-4V-A9QR	THYM	NA	NA	9.75486	10.03	0
TCGA-4V-A9QS	THYM	NA	NA	9.37325	10.5293	0
TCGA-4V-A9QT	THYM	NA	NA	9.15003	10.6182	0
TCGA-4V-A9QU	THYM	NA	NA	9.54076	10.6687	0
TCGA-4V-A9QW	THYM	NA	NA	9.92817	9.90663	0
TCGA-4V-A9QX	THYM	NA	NA	9.34602	10.3349	0
TCGA-4X-A9F9	THYM	NA	NA	10.0927	9.79873	0
TCGA-4X-A9FA	THYM	NA	NA	9.10232	10.0126	0
TCGA-4X-A9FB	THYM	NA	NA	8.9262	10.3015	0
TCGA-4X-A9FC	THYM	NA	NA	9.08587	10.6631	0
TCGA-4X-A9FD	THYM	NA	NA	8.77239	10.4316	0
TCGA-4Z-AA7M	BLCA	NA	NA	9.73538	10.9432	0
TCGA-4Z-AA7N	BLCA	NA	NA	8.29303	9.44068	0
TCGA-4Z-AA7O	BLCA	NA	NA	9.81976	10.2002	0
TCGA-4Z-AA7Q	BLCA	NA	NA	9.91819	10.8437	0
TCGA-4Z-AA7R	BLCA	NA	NA	9.61254	10.376	0
TCGA-4Z-AA7S	BLCA	NA	NA	9.3408	10.863	0
TCGA-4Z-AA7W	BLCA	NA	NA	10.5459	9.86723	0
TCGA-4Z-AA7Y	BLCA	NA	NA	8.9289	10.4636	0
TCGA-4Z-AA80	BLCA	NA	NA	10.1275	11.3656	0
TCGA-4Z-AA81	BLCA	NA	NA	9.00885	10.277	0
TCGA-4Z-AA82	BLCA	NA	NA	9.61179	10.9255	0
TCGA-4Z-AA83	BLCA	NA	NA	9.39362	9.65335	0
TCGA-4Z-AA84	BLCA	NA	NA	8.26853	10.645	0
TCGA-4Z-AA86	BLCA	NA	NA	8.7656	10.66	0
TCGA-4Z-AA87	BLCA	NA	NA	9.48499	10.6278	0
TCGA-4Z-AA89	BLCA	NA	NA	9.99466	10.0919	0
TCGA-50-5044	LUAD	154	0.409091	9.33963	9.45983	0
TCGA-50-5045	LUAD	332	0.141566	9.6551	9.45921	0
TCGA-50-5049	LUAD	905	0.122652	8.88465	9.60448	0
TCGA-50-5051	LUAD	126	0.174603	9.77106	9.80018	0
TCGA-50-5055	LUAD	22	0.272727	9.54274	9.30959	0
TCGA-50-5066	LUAD	432	0.166667	9.55576	9.8121	1
TCGA-50-5068	LUAD	103	0.184466	9.90855	9.16214	0
TCGA-50-5072	LUAD	167	0.233533	10.0091	11.0742	0
TCGA-50-5930	LUAD	1121	0.127565	9.31018	9.90116	1
TCGA-50-5931	LUAD	312	0.169872	9.80403	11.5023	0
TCGA-50-5932	LUAD	76	0.223684	8.96818	9.15648	1
TCGA-50-5933	LUAD	537	0.199255	8.79252	9.97549	0
TCGA-50-5935	LUAD	120	0.425	9.17509	9.3984	0
TCGA-50-5936	LUAD	139	0.28777	8.28264	10.2995	0
TCGA-50-5939	LUAD	95	0.305263	8.90557	10.0853	0
TCGA-50-5941	LUAD	403	0.176179	8.83013	9.48902	0
TCGA-50-5942	LUAD	75	0.186667	8.52201	8.82016	0
TCGA-50-5944	LUAD	72	0.305556	8.77235	9.60167	0
TCGA-50-5946	LUAD	658	0.197568	10.0186	9.80182	0
TCGA-50-6590	LUAD	984	0.189024	9.11323	10.7405	0
TCGA-50-6591	LUAD	63	0.31746	8.31198	9.89242	1
TCGA-50-6592	LUAD	299	0.227425	9.88076	10.8311	0
TCGA-50-6593	LUAD	332	0.192771	8.92162	9.26326	0
TCGA-50-6594	LUAD	513	0.17154	10.1603	10.6349	0
TCGA-50-6595	LUAD	107	0.392523	9.49751	9.82967	0
TCGA-50-6597	LUAD	64	0.328125	9.56203	9.44205	1
TCGA-50-6673	LUAD	53	0.207547	9.41362	9.64749	0
TCGA-50-7109	LUAD	249	0.160643	9.59909	9.94108	0
TCGA-50-8457	LUAD	51	0.215686	8.56455	9.40085	0
TCGA-50-8459	LUAD	90	0.144444	9.01396	8.83993	0
TCGA-50-8460	LUAD	25	0.32	9.32059	9.64698	0
TCGA-51-4079	LUSC	NA	NA	9.30456	11.2223	0
TCGA-51-4080	LUSC	NA	NA	9.54258	11.4146	0
TCGA-51-4081	LUSC	NA	NA	8.90458	10.7062	0
TCGA-51-6867	LUSC	NA	NA	10.1853	11.2265	0
TCGA-52-7622	LUSC	NA	NA	9.46269	10.0977	0
TCGA-52-7809	LUSC	NA	NA	10.5644	10.5271	0
TCGA-52-7810	LUSC	NA	NA	9.73049	10.1158	0
TCGA-52-7811	LUSC	NA	NA	9.2179	10.4616	0
TCGA-52-7812	LUSC	NA	NA	9.75307	11.3333	1
TCGA-53-7624	LUAD	850	0.198824	10.2815	10.1527	0
TCGA-53-7626	LUAD	376	0.143617	9.03376	9.4257	0
TCGA-53-7813	LUAD	146	0.178082	10.1296	10.4425	0
TCGA-53-A4EZ	LUAD	508	0.169291	9.95281	11.413	0
TCGA-55-1592	LUAD	674	0.235905	8.88351	9.27877	0
TCGA-55-1594	LUAD	274	0.270073	10.0027	10.8572	1
TCGA-55-1595	LUAD	338	0.156805	10.4055	10.7857	0
TCGA-55-1596	LUAD	226	0.172566	10.2523	10.8447	1
TCGA-55-5899	LUAD	448	0.234375	9.37525	9.78063	0
TCGA-55-6543	LUAD	23	0.0434783	8.68625	9.11972	0
TCGA-55-6642	LUAD	133	0.150376	8.99202	9.8466	0
TCGA-55-6712	LUAD	171	0.321637	8.36162	9.82925	0
TCGA-55-6968	LUAD	596	0.322148	8.94666	10.8917	0
TCGA-55-6969	LUAD	503	0.163022	9.26212	10.0902	0
TCGA-55-6970	LUAD	170	0.241176	8.52283	9.59591	0
TCGA-55-6971	LUAD	83	0.289157	8.875	9.95878	0
TCGA-55-6972	LUAD	300	0.403333	9.65248	9.46479	1
TCGA-55-6975	LUAD	81	0.185185	9.4354	10.0227	0
TCGA-55-6978	LUAD	39	0.25641	8.65766	10.1624	0
TCGA-55-6979	LUAD	161	0.149068	8.64988	9.51187	0
TCGA-55-6980	LUAD	19	0.315789	8.64895	8.4554	0
TCGA-55-6981	LUAD	60	0.25	9.30282	9.6391	0
TCGA-55-6982	LUAD	258	0.430233	8.96212	9.08231	1
TCGA-55-6983	LUAD	113	0.221239	8.76051	9.65405	0
TCGA-55-6984	LUAD	15	0.533333	8.31333	8.65175	1
TCGA-55-6985	LUAD	480	0.141667	9.06762	9.8328	0
TCGA-55-6986	LUAD	20	0.55	8.95315	8.8637	1
TCGA-55-6987	LUAD	256	0.25	9.06423	9.73778	0
TCGA-55-7227	LUAD	168	0.178571	8.32492	8.8911	0
TCGA-55-7281	LUAD	473	0.20296	9.60849	9.39676	1
TCGA-55-7283	LUAD	241	0.26556	8.52717	9.68221	0
TCGA-55-7284	LUAD	57	0.245614	9.55109	9.31947	0
TCGA-55-7570	LUAD	378	0.21164	9.62168	10.6077	0
TCGA-55-7573	LUAD	54	0.296296	8.92953	8.80335	0
TCGA-55-7574	LUAD	297	0.276094	8.71399	9.28525	0
TCGA-55-7576	LUAD	402	0.18408	9.26588	10.0116	0
TCGA-55-7724	LUAD	257	0.214008	8.91578	10.2038	0
TCGA-55-7725	LUAD	145	0.172414	8.88475	9.326	0
TCGA-55-7726	LUAD	120	0.216667	9.28489	10.4486	0
TCGA-55-7727	LUAD	280	0.325	8.08999	9.30821	0
TCGA-55-7728	LUAD	98	0.163265	10.5179	8.72213	0
TCGA-55-7815	LUAD	143	0.174825	8.85776	9.53427	0
TCGA-55-7816	LUAD	10	0.2	8.88606	9.52844	0
TCGA-55-7903	LUAD	162	0.265432	9.15609	10.132	0
TCGA-55-7907	LUAD	1172	0.1843	9.18026	9.70433	0
TCGA-55-7910	LUAD	304	0.154605	10.2909	10.6422	0
TCGA-55-7911	LUAD	243	0.152263	8.48967	9.50234	0
TCGA-55-7913	LUAD	357	0.204482	10.048	10.645	0
TCGA-55-7914	LUAD	182	0.142857	8.14903	9.35243	0
TCGA-55-7994	LUAD	1559	0.167415	8.49687	9.77698	0
TCGA-55-7995	LUAD	668	0.19012	9.46553	10.3395	0
TCGA-55-8085	LUAD	275	0.334545	9.70335	9.9374	0
TCGA-55-8087	LUAD	46	0.369565	9.11173	9.37021	0
TCGA-55-8089	LUAD	1312	0.238567	8.77708	9.73053	0
TCGA-55-8090	LUAD	96	0.177083	9.12109	9.05038	0
TCGA-55-8091	LUAD	36	0.222222	8.68743	9.4991	0
TCGA-55-8092	LUAD	590	0.269492	9.88671	9.23124	0
TCGA-55-8094	LUAD	471	0.154989	9.64472	9.23361	0
TCGA-55-8096	LUAD	147	0.170068	10.0524	9.05955	0
TCGA-55-8097	LUAD	126	0.214286	9.22324	9.21063	0
TCGA-55-8203	LUAD	424	0.127358	9.51087	10.1159	0
TCGA-55-8204	LUAD	233	0.274678	8.66575	9.80896	0
TCGA-55-8205	LUAD	549	0.216758	8.99832	10.119	0
TCGA-55-8206	LUAD	36	0.277778	8.66982	9.03239	0
TCGA-55-8207	LUAD	332	0.165663	8.5291	9.23161	0
TCGA-55-8208	LUAD	490	0.336735	9.1215	9.71091	0
TCGA-55-8299	LUAD	333	0.207207	8.84402	8.89227	1
TCGA-55-8301	LUAD	351	0.17094	9.30142	9.34119	0
TCGA-55-8302	LUAD	688	0.172965	9.48836	10.0139	0
TCGA-55-8505	LUAD	40	0.225	9.95555	9.91121	0
TCGA-55-8506	LUAD	1645	0.164134	9.52452	9.41216	0
TCGA-55-8507	LUAD	954	0.162474	9.92058	9.99591	0
TCGA-55-8508	LUAD	179	0.189944	9.97215	8.85307	0
TCGA-55-8510	LUAD	326	0.159509	9.21937	9.17118	0
TCGA-55-8511	LUAD	596	0.208054	8.25591	8.92789	0
TCGA-55-8512	LUAD	38	0.263158	8.55767	9.07918	0
TCGA-55-8513	LUAD	4	0.5	8.87524	8.84995	0
TCGA-55-8514	LUAD	278	0.169065	8.82306	8.26558	0
TCGA-55-8614	LUAD	229	0.19214	8.93206	10.3275	0
TCGA-55-8615	LUAD	117	0.196581	10.1283	9.5727	0
TCGA-55-8616	LUAD	484	0.152893	8.91174	9.13706	0
TCGA-55-8619	LUAD	19	0.105263	8.40746	8.70795	0
TCGA-55-8620	LUAD	482	0.174274	9.58603	10.4884	0
TCGA-55-8621	LUAD	118	0.177966	9.05221	9.08246	0
TCGA-55-A48X	LUAD	410	0.190244	8.65719	9.00611	0
TCGA-55-A48Y	LUAD	365	0.419178	9.66622	10.4471	0
TCGA-55-A48Z	LUAD	51	0.27451	9.43157	9.3436	0
TCGA-55-A490	LUAD	1317	0.150342	10.0669	9.78975	0
TCGA-55-A491	LUAD	379	0.176781	9.73433	10.4886	0
TCGA-55-A492	LUAD	292	0.205479	10.3239	9.06506	0
TCGA-55-A493	LUAD	282	0.265957	9.65232	10.6854	0
TCGA-55-A494	LUAD	236	0.110169	9.92884	9.7723	0
TCGA-55-A4DF	LUAD	805	0.361491	9.13726	10.4164	0
TCGA-55-A4DG	LUAD	683	0.131772	8.60452	8.70822	0
TCGA-55-A57B	LUAD	NA	NA	8.2938	8.90447	0
TCGA-56-1622	LUSC	NA	NA	8.95845	10.2486	1
TCGA-56-5897	LUSC	NA	NA	8.89126	10.0594	0
TCGA-56-5898	LUSC	NA	NA	8.72264	9.57908	0
TCGA-56-6545	LUSC	NA	NA	8.91201	10.0751	0
TCGA-56-6546	LUSC	NA	NA	9.3284	11.1612	0
TCGA-56-7221	LUSC	NA	NA	9.62201	10.5674	0
TCGA-56-7222	LUSC	NA	NA	8.84433	10.7272	0
TCGA-56-7223	LUSC	NA	NA	9.755	10.6725	0
TCGA-56-7579	LUSC	NA	NA	9.07089	10.6349	0
TCGA-56-7580	LUSC	NA	NA	9.26128	10.848	0
TCGA-56-7582	LUSC	NA	NA	9.20572	11.2301	1
TCGA-56-7730	LUSC	NA	NA	9.99409	10.7359	0
TCGA-56-7731	LUSC	NA	NA	8.82122	10.0011	0
TCGA-56-7822	LUSC	NA	NA	9.29961	9.34926	0
TCGA-56-7823	LUSC	NA	NA	9.88956	11.1277	0
TCGA-56-8082	LUSC	NA	NA	9.35312	10.4738	0
TCGA-56-8083	LUSC	NA	NA	9.30325	10.4273	0
TCGA-56-8201	LUSC	NA	NA	9.0155	10.0541	0
TCGA-56-8304	LUSC	NA	NA	8.54903	11.1762	0
TCGA-56-8305	LUSC	NA	NA	10.3111	10.6471	0
TCGA-56-8307	LUSC	NA	NA	9.62702	11.1088	0
TCGA-56-8308	LUSC	NA	NA	9.77951	10.0408	0
TCGA-56-8309	LUSC	NA	NA	9.18323	9.98724	0
TCGA-56-8503	LUSC	NA	NA	9.41213	9.68061	0
TCGA-56-8504	LUSC	NA	NA	9.25238	10.7077	0
TCGA-56-8622	LUSC	NA	NA	9.58803	9.59652	0
TCGA-56-8623	LUSC	NA	NA	8.47378	8.94268	0
TCGA-56-8624	LUSC	NA	NA	8.98592	9.49096	0
TCGA-56-8625	LUSC	NA	NA	8.53781	10.3335	0
TCGA-56-8626	LUSC	NA	NA	9.08734	9.68868	0
TCGA-56-8628	LUSC	NA	NA	8.98535	9.67608	0
TCGA-56-8629	LUSC	NA	NA	10.5977	10.3043	0
TCGA-56-A49D	LUSC	NA	NA	8.87941	10.1367	0
TCGA-56-A4BW	LUSC	NA	NA	9.06119	10.7029	0
TCGA-56-A4BX	LUSC	NA	NA	9.36195	10.1985	0
TCGA-56-A4BY	LUSC	NA	NA	9.12561	10.6149	0
TCGA-56-A4ZJ	LUSC	NA	NA	8.95608	9.38436	0
TCGA-56-A4ZK	LUSC	NA	NA	9.06409	11.2769	0
TCGA-56-A5DR	LUSC	NA	NA	9.92023	10.8525	0
TCGA-56-A5DS	LUSC	NA	NA	9.31587	10.2581	0
TCGA-56-A62T	LUSC	NA	NA	9.96221	10.7195	0
TCGA-57-1582	OV	NA	NA	8.86	11.7936	0
TCGA-57-1583	OV	NA	NA	9.57476	11.4147	0
TCGA-57-1584	OV	NA	NA	9.74624	9.51555	0
TCGA-57-1993	OV	NA	NA	9.52317	11.5393	0
TCGA-57-1994	OV	NA	NA	9.94638	10.9765	0
TCGA-58-8386	LUSC	NA	NA	8.67268	9.7557	0
TCGA-58-8387	LUSC	NA	NA	10.1837	10.8506	0
TCGA-58-8388	LUSC	NA	NA	9.49167	10.6343	0
TCGA-58-8390	LUSC	NA	NA	9.54138	10.3707	0
TCGA-58-8391	LUSC	NA	NA	8.68966	10.8015	0
TCGA-58-8392	LUSC	NA	NA	9.77309	10.6035	0
TCGA-58-8393	LUSC	NA	NA	9.5899	10.2401	0
TCGA-58-A46J	LUSC	NA	NA	10.0302	10.871	0
TCGA-58-A46K	LUSC	NA	NA	9.81096	10.6716	0
TCGA-58-A46L	LUSC	NA	NA	9.94159	10.4397	0
TCGA-58-A46M	LUSC	NA	NA	9.08601	10.8897	0
TCGA-58-A46N	LUSC	NA	NA	8.63545	11.3664	0
TCGA-59-2348	OV	NA	NA	9.61639	10.6003	0
TCGA-59-2350	OV	NA	NA	9.64318	10.0058	0
TCGA-59-2351	OV	NA	NA	9.92997	11.3123	0
TCGA-59-2352	OV	NA	NA	9.42062	10.9052	0
TCGA-59-2355	OV	NA	NA	9.28523	10.0563	0
TCGA-59-2363	OV	NA	NA	8.78294	11.697	0
TCGA-5B-A90C	UCEC	NA	NA	9.06233	10.1625	0
TCGA-5C-A9VG	LIHC	NA	NA	9.59867	11.0337	0
TCGA-5C-A9VH	LIHC	NA	NA	9.45646	10.1043	0
TCGA-5C-AAPD	LIHC	NA	NA	10.1844	10.5849	0
TCGA-5G-A9ZZ	THYM	NA	NA	9.65917	10.0829	0
TCGA-5K-AAAP	THYM	NA	NA	9.30886	10.5015	0
TCGA-5L-AAT0	BRCA	NA	NA	9.14632	9.7243	0
TCGA-5L-AAT1	BRCA	NA	NA	9.65906	9.21068	0
TCGA-5M-AAT4	COAD	NA	NA	9.01221	10.5105	0
TCGA-5M-AAT5	COAD	NA	NA	9.54375	10.3337	0
TCGA-5M-AAT6	COAD	NA	NA	8.76515	10.7738	0
TCGA-5M-AATA	COAD	NA	NA	8.95484	10.9072	0
TCGA-5M-AATE	COAD	NA	NA	9.09934	10.06	0
TCGA-5N-A9KI	BLCA	NA	NA	9.45233	9.60335	0
TCGA-5N-A9KM	BLCA	NA	NA	10.2341	10.4794	0
TCGA-5P-A9JU	KIRP	NA	NA	9.58616	10.4122	0
TCGA-5P-A9JV	KIRP	NA	NA	9.10472	9.72004	0
TCGA-5P-A9JW	KIRP	NA	NA	9.6453	9.78299	0
TCGA-5P-A9JY	KIRP	NA	NA	9.65692	9.72248	0
TCGA-5P-A9JZ	KIRP	NA	NA	9.10463	9.84087	0
TCGA-5P-A9K0	KIRP	NA	NA	9.64341	10.6685	0
TCGA-5P-A9K2	KIRP	NA	NA	10.233	9.48194	0
TCGA-5P-A9K3	KIRP	NA	NA	9.94674	10.5966	0
TCGA-5P-A9K4	KIRP	NA	NA	9.26595	9.43588	0
TCGA-5P-A9K6	KIRP	NA	NA	9.32521	9.93988	0
TCGA-5P-A9K8	KIRP	NA	NA	9.47887	11.2838	0
TCGA-5P-A9K9	KIRP	NA	NA	10.0839	11.0207	0
TCGA-5P-A9KA	KIRP	NA	NA	9.29455	10.2682	0
TCGA-5P-A9KC	KIRP	NA	NA	9.53063	11.0445	0
TCGA-5P-A9KE	KIRP	NA	NA	9.25588	10.3127	0
TCGA-5P-A9KF	KIRP	NA	NA	9.45057	9.16836	0
TCGA-5P-A9KH	KIRP	NA	NA	9.30836	9.63784	0
TCGA-5R-AA1C	LIHC	NA	NA	9.23099	10.2045	0
TCGA-5R-AA1D	LIHC	NA	NA	8.07796	9.89005	0
TCGA-5R-AAAM	LIHC	NA	NA	8.77596	9.80938	0
TCGA-5S-A9Q8	UCEC	NA	NA	10.4576	9.23872	0
TCGA-5T-A9QA	BRCA	NA	NA	9.54268	11.8171	0
TCGA-5U-AB0D	THYM	NA	NA	11.445	9.03157	0
TCGA-5U-AB0E	THYM	NA	NA	9.67167	10.0194	0
TCGA-5U-AB0F	THYM	NA	NA	10.1784	9.89081	0
TCGA-5V-A9RR	THYM	NA	NA	10.0174	10.2681	0
TCGA-60-2695	LUSC	NA	NA	9.94305	11.0544	1
TCGA-60-2696	LUSC	NA	NA	8.87044	10.2053	0
TCGA-60-2697	LUSC	NA	NA	8.69055	9.48671	0
TCGA-60-2698	LUSC	NA	NA	10.1671	9.86177	1
TCGA-60-2703	LUSC	NA	NA	8.67341	10.4494	0
TCGA-60-2704	LUSC	NA	NA	8.84178	9.99851	0
TCGA-60-2706	LUSC	NA	NA	9.32685	11.4469	0
TCGA-60-2707	LUSC	NA	NA	8.93968	10.1852	0
TCGA-60-2708	LUSC	NA	NA	9.39115	10.8907	0
TCGA-60-2709	LUSC	NA	NA	9.0882	9.93822	0
TCGA-60-2710	LUSC	NA	NA	8.9731	11.3528	0
TCGA-60-2711	LUSC	NA	NA	10.0018	11.0803	1
TCGA-60-2712	LUSC	NA	NA	9.26767	10.0155	0
TCGA-60-2713	LUSC	NA	NA	8.97089	10.4125	1
TCGA-60-2714	LUSC	NA	NA	9.17832	9.61294	0
TCGA-60-2715	LUSC	NA	NA	8.96717	10.463	0
TCGA-60-2716	LUSC	NA	NA	8.81803	10.6668	0
TCGA-60-2719	LUSC	NA	NA	9.57966	11.0115	1
TCGA-60-2720	LUSC	NA	NA	9.53231	9.91222	0
TCGA-60-2721	LUSC	NA	NA	9.64344	10.3759	0
TCGA-60-2722	LUSC	NA	NA	9.14485	10.4807	1
TCGA-60-2723	LUSC	NA	NA	8.35479	10.1846	0
TCGA-60-2724	LUSC	NA	NA	9.67137	10.6072	1
TCGA-60-2725	LUSC	NA	NA	10.0271	10.6389	0
TCGA-60-2726	LUSC	NA	NA	10.0502	11.2444	0
TCGA-61-1721	OV	NA	NA	8.35873	9.5948	0
TCGA-61-1724	OV	NA	NA	9.36188	10.0622	0
TCGA-61-1725	OV	NA	NA	9.94672	11.2138	0
TCGA-61-1728	OV	NA	NA	9.71846	10.9704	0
TCGA-61-1733	OV	NA	NA	9.24052	10.7513	0
TCGA-61-1736	OV	NA	NA	8.88123	10.7582	0
TCGA-61-1738	OV	NA	NA	9.48511	10.7259	0
TCGA-61-1740	OV	NA	NA	9.45526	11.5309	0
TCGA-61-1741	OV	NA	NA	9.70341	11.4368	0
TCGA-61-1743	OV	NA	NA	9.73056	11.5353	0
TCGA-61-1900	OV	NA	NA	9.21904	11.1926	0
TCGA-61-1907	OV	NA	NA	10.0759	11.1418	0
TCGA-61-1910	OV	NA	NA	8.72984	11.3022	0
TCGA-61-1914	OV	NA	NA	10.0191	10.9629	0
TCGA-61-1917	OV	NA	NA	9.98704	11.4828	0
TCGA-61-1918	OV	NA	NA	8.906	10.5544	0
TCGA-61-1919	OV	NA	NA	8.83232	10.7838	0
TCGA-61-1995	OV	NA	NA	9.39755	11.3061	0
TCGA-61-1998	OV	NA	NA	9.46213	10.7447	0
TCGA-61-2000	OV	NA	NA	9.66642	11.3164	0
TCGA-61-2008	OV	NA	NA	7.62854	10.5287	0
TCGA-61-2009	OV	NA	NA	9.56867	10.6584	0
TCGA-61-2012	OV	NA	NA	9.67324	10.447	0
TCGA-61-2016	OV	NA	NA	9.62701	11.018	0
TCGA-61-2088	OV	NA	NA	10.3181	9.82513	0
TCGA-61-2092	OV	NA	NA	9.70913	10.5662	0
TCGA-61-2094	OV	NA	NA	9.10084	10.6856	0
TCGA-61-2097	OV	NA	NA	9.02103	10.3839	0
TCGA-61-2098	OV	NA	NA	9.90503	11.0243	0
TCGA-61-2102	OV	NA	NA	9.30002	10.009	0
TCGA-61-2104	OV	NA	NA	8.1615	10.1894	0
TCGA-61-2109	OV	NA	NA	9.38474	11.2708	0
TCGA-61-2110	OV	NA	NA	9.80374	10.5418	0
TCGA-61-2111	OV	NA	NA	8.84336	10.7674	0
TCGA-61-2113	OV	NA	NA	8.93225	10.3813	0
TCGA-62-8394	LUAD	148	0.25	9.64401	9.80558	0
TCGA-62-8395	LUAD	74	0.256757	9.38278	9.60545	0
TCGA-62-8397	LUAD	34	0.235294	9.366	8.78423	0
TCGA-62-8398	LUAD	92	0.271739	9.61205	10.0188	0
TCGA-62-8399	LUAD	541	0.227357	8.57456	10.0745	0
TCGA-62-8402	LUAD	62	0.306452	10.0976	9.9794	0
TCGA-62-A46O	LUAD	888	0.197072	10.1081	10.0682	0
TCGA-62-A46P	LUAD	287	0.114983	10.1151	9.13161	0
TCGA-62-A46R	LUAD	170	0.258824	8.87407	8.68186	0
TCGA-62-A46S	LUAD	122	0.245902	9.36738	8.44437	0
TCGA-62-A46U	LUAD	42	0.285714	8.91448	9.41336	0
TCGA-62-A46V	LUAD	54	0.296296	9.61675	9.96363	0
TCGA-62-A46Y	LUAD	35	0.142857	8.68309	8.91949	0
TCGA-62-A470	LUAD	104	0.173077	10.1615	9.34211	0
TCGA-62-A471	LUAD	109	0.376147	10.6448	10.4512	0
TCGA-62-A472	LUAD	55	0.254545	8.71385	9.80073	0
TCGA-63-5128	LUSC	NA	NA	8.97465	10.6821	0
TCGA-63-5131	LUSC	NA	NA	9.89992	10.593	0
TCGA-63-6202	LUSC	NA	NA	9.0762	9.50767	0
TCGA-63-7020	LUSC	NA	NA	8.9593	10.4179	0
TCGA-63-7021	LUSC	NA	NA	9.15702	10.1708	0
TCGA-63-7022	LUSC	NA	NA	8.76278	10.1185	0
TCGA-63-7023	LUSC	NA	NA	9.60787	11.1468	0
TCGA-63-A5M9	LUSC	NA	NA	9.95316	10.3381	0
TCGA-63-A5MB	LUSC	NA	NA	10.0931	10.3573	0
TCGA-63-A5MG	LUSC	NA	NA	8.86003	9.97427	0
TCGA-63-A5MH	LUSC	NA	NA	9.80232	10.5955	0
TCGA-63-A5MI	LUSC	NA	NA	8.22882	11.2259	0
TCGA-63-A5MJ	LUSC	NA	NA	9.57852	11.0031	0
TCGA-63-A5ML	LUSC	NA	NA	9.51587	10.875	0
TCGA-63-A5MM	LUSC	NA	NA	9.6048	10.1333	0
TCGA-63-A5MN	LUSC	NA	NA	9.06298	9.63114	0
TCGA-63-A5MP	LUSC	NA	NA	9.59501	10.365	0
TCGA-63-A5MR	LUSC	NA	NA	9.66569	10.989	0
TCGA-63-A5MS	LUSC	NA	NA	8.87861	9.48782	0
TCGA-63-A5MT	LUSC	NA	NA	9.22162	10.0362	0
TCGA-63-A5MU	LUSC	NA	NA	9.09838	10.9942	0
TCGA-63-A5MV	LUSC	NA	NA	9.23996	9.95878	0
TCGA-63-A5MW	LUSC	NA	NA	9.3815	9.99519	0
TCGA-63-A5MY	LUSC	NA	NA	9.56505	11.4438	0
TCGA-64-1676	LUAD	646	0.156347	10.7363	9.6102	0
TCGA-64-1677	LUAD	245	0.273469	10.1728	10.8594	0
TCGA-64-1678	LUAD	426	0.246479	10.6444	10.1486	1
TCGA-64-1679	LUAD	515	0.147573	9.0839	9.54263	0
TCGA-64-1680	LUAD	85	0.294118	9.51361	9.83495	0
TCGA-64-1681	LUAD	87	0.321839	9.42511	9.41674	0
TCGA-64-5774	LUAD	144	0.145833	10.0731	9.94949	0
TCGA-64-5775	LUAD	470	0.148936	8.72543	9.82105	0
TCGA-64-5778	LUAD	475	0.168421	9.22857	9.22733	0
TCGA-64-5779	LUAD	365	0.147945	10.0528	10.0901	0
TCGA-64-5781	LUAD	1148	0.190767	9.87187	9.17366	0
TCGA-64-5815	LUAD	177	0.225989	8.61177	9.34525	0
TCGA-66-2727	LUSC	NA	NA	9.07053	11.2116	0
TCGA-66-2734	LUSC	NA	NA	8.91232	10.0448	0
TCGA-66-2737	LUSC	NA	NA	9.73494	10.4857	0
TCGA-66-2742	LUSC	NA	NA	9.44311	10.5696	0
TCGA-66-2744	LUSC	NA	NA	9.62178	10.2324	1
TCGA-66-2753	LUSC	NA	NA	9.28997	10.4544	0
TCGA-66-2754	LUSC	NA	NA	10.2718	11.3233	0
TCGA-66-2755	LUSC	NA	NA	9.0702	11.1234	0
TCGA-66-2756	LUSC	NA	NA	9.64189	11.6317	1
TCGA-66-2757	LUSC	NA	NA	9.90164	11.8055	1
TCGA-66-2758	LUSC	NA	NA	9.87159	11.0535	0
TCGA-66-2759	LUSC	NA	NA	9.7538	11.3204	1
TCGA-66-2763	LUSC	NA	NA	8.9077	10.3777	0
TCGA-66-2765	LUSC	NA	NA	9.10674	10.4367	0
TCGA-66-2766	LUSC	NA	NA	10.8946	10.7073	1
TCGA-66-2767	LUSC	NA	NA	9.5591	11.4898	0
TCGA-66-2768	LUSC	NA	NA	10.0963	10.7183	0
TCGA-66-2769	LUSC	NA	NA	9.48657	10.2645	0
TCGA-66-2770	LUSC	NA	NA	9.23061	10.2274	0
TCGA-66-2771	LUSC	NA	NA	9.96326	10.8707	0
TCGA-66-2773	LUSC	NA	NA	8.80671	10.9184	0
TCGA-66-2777	LUSC	NA	NA	8.75565	10.8711	0
TCGA-66-2778	LUSC	NA	NA	10.9922	11.2553	0
TCGA-66-2780	LUSC	NA	NA	9.65734	10.8877	0
TCGA-66-2781	LUSC	NA	NA	10.1493	10.7464	0
TCGA-66-2782	LUSC	NA	NA	9.43864	10.7625	0
TCGA-66-2783	LUSC	NA	NA	9.02001	11.4094	0
TCGA-66-2785	LUSC	NA	NA	9.83934	10.4554	0
TCGA-66-2786	LUSC	NA	NA	9.33244	10.6432	0
TCGA-66-2787	LUSC	NA	NA	9.73001	10.7452	0
TCGA-66-2788	LUSC	NA	NA	8.71387	10.464	0
TCGA-66-2789	LUSC	NA	NA	9.59758	10.3758	1
TCGA-66-2790	LUSC	NA	NA	9.62065	11.3429	0
TCGA-66-2791	LUSC	NA	NA	9.54906	10.8657	0
TCGA-66-2792	LUSC	NA	NA	9.44483	11.0336	0
TCGA-66-2793	LUSC	NA	NA	9.88889	11.3162	1
TCGA-66-2794	LUSC	NA	NA	9.8242	11.6878	0
TCGA-66-2795	LUSC	NA	NA	9.58977	10.993	1
TCGA-66-2800	LUSC	NA	NA	10.0187	10.7712	0
TCGA-67-3770	LUAD	249	0.180723	10.1285	9.47656	0
TCGA-67-3771	LUAD	1288	0.260093	9.52769	9.27506	1
TCGA-67-3772	LUAD	65	0.246154	9.80369	9.29526	1
TCGA-67-3773	LUAD	99	0.191919	9.30393	9.03949	0
TCGA-67-3774	LUAD	174	0.275862	9.50796	8.76254	0
TCGA-67-4679	LUAD	284	0.179577	8.28344	9.12048	0
TCGA-67-6215	LUAD	128	0.203125	8.59183	9.21707	1
TCGA-67-6216	LUAD	49	0.428571	8.70075	9.78122	0
TCGA-67-6217	LUAD	207	0.217391	7.93024	8.73999	0
TCGA-68-7755	LUSC	NA	NA	9.68944	10.9195	1
TCGA-68-7756	LUSC	NA	NA	8.99749	10.6565	0
TCGA-68-7757	LUSC	NA	NA	9.33355	8.91965	0
TCGA-68-8250	LUSC	NA	NA	9.88362	9.79149	1
TCGA-68-8251	LUSC	NA	NA	9.86539	11.0392	0
TCGA-68-A59I	LUSC	NA	NA	9.20262	9.11176	0
TCGA-68-A59J	LUSC	NA	NA	8.96876	10.6912	0
TCGA-69-7760	LUAD	70	0.285714	10.3118	10.0966	0
TCGA-69-7761	LUAD	32	0.1875	9.24969	9.51315	0
TCGA-69-7763	LUAD	75	0.226667	8.42884	9.23725	0
TCGA-69-7764	LUAD	99	0.292929	9.14714	9.58478	0
TCGA-69-7765	LUAD	683	0.210835	8.63301	9.02057	0
TCGA-69-7973	LUAD	253	0.162055	9.21731	10.4546	0
TCGA-69-7974	LUAD	517	0.168279	8.44048	9.50609	0
TCGA-69-7978	LUAD	678	0.199115	8.66241	10.0836	0
TCGA-69-7979	LUAD	1458	0.150892	9.24173	9.93578	0
TCGA-69-7980	LUAD	835	0.183234	10.2021	10.3201	0
TCGA-69-8253	LUAD	155	0.174194	8.76912	8.86594	0
TCGA-69-8254	LUAD	80	0.1875	8.79017	8.84601	0
TCGA-69-8255	LUAD	288	0.211806	10.0192	10.4383	0
TCGA-69-8453	LUAD	NA	NA	8.81003	9.26103	0
TCGA-69-A59K	LUAD	505	0.164356	9.89859	9.78651	0
TCGA-6A-AB49	LUSC	NA	NA	10.1682	10.0648	0
TCGA-6D-AA2E	KIRC	NA	NA	9.20817	10.6642	0
TCGA-70-6722	LUSC	NA	NA	8.04858	10.1271	0
TCGA-70-6723	LUSC	NA	NA	9.40326	10.9962	0
TCGA-71-6725	LUAD	64	0.328125	9.09205	8.64953	0
TCGA-71-8520	LUAD	89	0.235955	8.95957	9.17605	0
TCGA-73-4658	LUAD	NA	NA	9.18271	9.33956	0
TCGA-73-4659	LUAD	208	0.168269	9.34054	9.9761	1
TCGA-73-4662	LUAD	242	0.165289	8.93718	9.56318	0
TCGA-73-4666	LUAD	396	0.156566	9.33969	10.7469	0
TCGA-73-4668	LUAD	583	0.149228	8.71061	9.722	0
TCGA-73-4670	LUAD	346	0.179191	10.9968	9.25416	0
TCGA-73-4675	LUAD	70	0.271429	9.73877	9.93004	0
TCGA-73-4676	LUAD	99	0.181818	9.15995	10.0967	0
TCGA-73-4677	LUAD	260	0.215385	8.65476	8.73527	0
TCGA-73-7498	LUAD	125	0.192	9.2041	8.83456	0
TCGA-73-7499	LUAD	89	0.303371	10.2141	10.2527	0
TCGA-73-A9RS	LUAD	NA	NA	9.96578	8.72293	0
TCGA-75-5122	LUAD	168	0.208333	8.85711	9.23886	0
TCGA-75-5125	LUAD	171	0.19883	9.5918	10.7578	0
TCGA-75-5126	LUAD	687	0.212518	9.4443	10.5584	0
TCGA-75-5146	LUAD	202	0.123762	9.65049	10.1244	0
TCGA-75-5147	LUAD	46	0.217391	9.7847	10.6136	1
TCGA-75-6203	LUAD	13	0.230769	8.41417	8.70553	1
TCGA-75-6205	LUAD	49	0.204082	8.18328	9.88921	0
TCGA-75-6206	LUAD	91	0.21978	8.51179	9.11652	0
TCGA-75-6207	LUAD	81	0.283951	9.39156	10.1601	0
TCGA-75-6211	LUAD	364	0.178571	9.95818	10.2444	0
TCGA-75-6212	LUAD	23	0.521739	8.73592	9.73328	0
TCGA-75-6214	LUAD	769	0.244473	8.79147	10.2334	0
TCGA-75-7025	LUAD	35	0.314286	8.90675	9.18599	0
TCGA-75-7027	LUAD	238	0.159664	9.52914	9.85423	0
TCGA-75-7030	LUAD	24	0.125	8.69189	9.22882	1
TCGA-75-7031	LUAD	225	0.208889	10.262	9.41076	0
TCGA-76-4925	GBM	NA	NA	9.71739	10.3111	0
TCGA-76-4926	GBM	NA	NA	9.46107	10.2834	0
TCGA-76-4927	GBM	NA	NA	9.0458	10.0114	0
TCGA-76-4928	GBM	NA	NA	9.19556	9.94156	0
TCGA-76-4929	GBM	NA	NA	9.76749	10.7931	0
TCGA-76-4931	GBM	NA	NA	9.39535	10.2496	0
TCGA-76-4932	GBM	NA	NA	9.66788	9.97865	0
TCGA-77-6842	LUSC	NA	NA	9.5524	10.5068	0
TCGA-77-6843	LUSC	NA	NA	9.73429	10.0491	1
TCGA-77-6844	LUSC	NA	NA	9.52962	10.5919	0
TCGA-77-6845	LUSC	NA	NA	9.29083	10.4231	0
TCGA-77-7138	LUSC	NA	NA	8.73407	10.7957	0
TCGA-77-7139	LUSC	NA	NA	9.22161	10.8506	1
TCGA-77-7140	LUSC	NA	NA	9.78555	10.6959	0
TCGA-77-7141	LUSC	NA	NA	9.00166	11.0293	0
TCGA-77-7142	LUSC	NA	NA	8.62658	10.3271	0
TCGA-77-7335	LUSC	NA	NA	9.30977	10.2646	0
TCGA-77-7337	LUSC	NA	NA	9.09021	10.9003	0
TCGA-77-7338	LUSC	NA	NA	9.33089	9.90479	0
TCGA-77-7463	LUSC	NA	NA	8.80022	11.0965	0
TCGA-77-7465	LUSC	NA	NA	9.95663	10.8369	0
TCGA-77-8007	LUSC	NA	NA	8.61253	9.67978	0
TCGA-77-8008	LUSC	NA	NA	9.24284	9.03001	0
TCGA-77-8009	LUSC	NA	NA	9.1501	10.6105	0
TCGA-77-8128	LUSC	NA	NA	9.42734	10.7355	0
TCGA-77-8130	LUSC	NA	NA	8.72478	9.39533	0
TCGA-77-8131	LUSC	NA	NA	8.33412	9.42267	0
TCGA-77-8133	LUSC	NA	NA	9.38474	10.7368	0
TCGA-77-8136	LUSC	NA	NA	9.08308	9.94373	0
TCGA-77-8138	LUSC	NA	NA	9.2185	9.95695	0
TCGA-77-8139	LUSC	NA	NA	9.1591	11.2717	0
TCGA-77-8140	LUSC	NA	NA	9.44357	10.5244	0
TCGA-77-8143	LUSC	NA	NA	9.46829	10.9883	0
TCGA-77-8144	LUSC	NA	NA	8.91416	11.2216	0
TCGA-77-8145	LUSC	NA	NA	9.07479	9.93378	0
TCGA-77-8146	LUSC	NA	NA	9.30742	10.4631	0
TCGA-77-8148	LUSC	NA	NA	9.66817	10.9319	0
TCGA-77-8150	LUSC	NA	NA	9.48036	11.6015	0
TCGA-77-8153	LUSC	NA	NA	9.39267	10.8327	0
TCGA-77-8154	LUSC	NA	NA	10.102	11.1631	0
TCGA-77-8156	LUSC	NA	NA	9.33895	9.7365	0
TCGA-77-A5FZ	LUSC	NA	NA	8.62653	9.07921	0
TCGA-77-A5G1	LUSC	NA	NA	9.39946	9.61985	0
TCGA-77-A5G3	LUSC	NA	NA	9.58961	11.1617	0
TCGA-77-A5G6	LUSC	NA	NA	8.83575	10.863	0
TCGA-77-A5G7	LUSC	NA	NA	10.1539	10.7873	0
TCGA-77-A5G8	LUSC	NA	NA	9.27636	10.4031	0
TCGA-77-A5GA	LUSC	NA	NA	9.61053	11.3019	0
TCGA-77-A5GB	LUSC	NA	NA	8.47119	10.1479	0
TCGA-77-A5GF	LUSC	NA	NA	9.25865	10.605	0
TCGA-77-A5GH	LUSC	NA	NA	8.7187	9.51588	0
TCGA-78-7143	LUAD	NA	NA	8.91936	9.40008	0
TCGA-78-7145	LUAD	193	0.15544	8.92798	9.9536	0
TCGA-78-7146	LUAD	370	0.224324	9.19738	10.8308	1
TCGA-78-7147	LUAD	362	0.254144	9.6782	10.4763	0
TCGA-78-7148	LUAD	225	0.151111	9.20263	10.0159	0
TCGA-78-7149	LUAD	176	0.352273	9.51082	9.32734	0
TCGA-78-7150	LUAD	425	0.298824	10.094	10.1373	0
TCGA-78-7152	LUAD	216	0.324074	8.41654	9.63445	0
TCGA-78-7153	LUAD	123	0.235772	9.42446	10.2116	0
TCGA-78-7154	LUAD	261	0.321839	9.16015	10.3472	0
TCGA-78-7155	LUAD	1465	0.145392	8.30101	10.6729	0
TCGA-78-7156	LUAD	367	0.305177	8.98362	9.09281	1
TCGA-78-7158	LUAD	243	0.193416	8.19245	9.73378	1
TCGA-78-7159	LUAD	305	0.140984	9.61069	10.0685	0
TCGA-78-7160	LUAD	46	0.23913	8.16524	9.74491	0
TCGA-78-7161	LUAD	192	0.1875	9.98127	9.16379	0
TCGA-78-7162	LUAD	97	0.28866	9.3069	9.38399	0
TCGA-78-7163	LUAD	22	0.181818	9.05636	8.7563	0
TCGA-78-7166	LUAD	225	0.164444	10.42	9.61921	0
TCGA-78-7167	LUAD	200	0.225	9.86456	8.51852	0
TCGA-78-7220	LUAD	836	0.211722	10.2118	9.79344	0
TCGA-78-7535	LUAD	183	0.15847	10.0003	9.19483	1
TCGA-78-7536	LUAD	610	0.17541	10.264	10.5791	0
TCGA-78-7537	LUAD	137	0.211679	8.70234	9.10964	0
TCGA-78-7539	LUAD	523	0.282983	9.83231	9.36394	0
TCGA-78-7540	LUAD	24	0.416667	10.0984	8.80539	0
TCGA-78-7542	LUAD	381	0.194226	8.16895	9.51802	0
TCGA-78-7633	LUAD	94	0.159574	9.40947	9.41496	0
TCGA-78-8640	LUAD	728	0.193681	9.30765	10.5054	0
TCGA-78-8648	LUAD	17	0.176471	8.80629	9.9525	0
TCGA-78-8655	LUAD	106	0.179245	9.57341	9.78704	0
TCGA-78-8660	LUAD	256	0.214844	9.59956	9.98307	0
TCGA-78-8662	LUAD	1171	0.166524	9.37172	8.91427	0
TCGA-79-5596	LUSC	NA	NA	9.73635	10.7886	0
TCGA-80-5607	LUAD	137	0.437956	8.63621	9.57288	0
TCGA-80-5608	LUAD	164	0.121951	10.1256	9.63308	0
TCGA-80-5611	LUAD	219	0.251142	9.0846	9.70371	0
TCGA-83-5908	LUAD	244	0.221311	9.0858	10.3724	0
TCGA-85-6175	LUSC	NA	NA	8.3678	9.46044	0
TCGA-85-6560	LUSC	NA	NA	8.28104	11.2685	0
TCGA-85-6561	LUSC	NA	NA	8.95851	10.0126	0
TCGA-85-6798	LUSC	NA	NA	9.09937	10.1427	0
TCGA-85-7696	LUSC	NA	NA	9.23643	10.5888	0
TCGA-85-7697	LUSC	NA	NA	9.7589	9.77925	0
TCGA-85-7698	LUSC	NA	NA	9.52948	10.6466	0
TCGA-85-7699	LUSC	NA	NA	8.91885	11.099	0
TCGA-85-7710	LUSC	NA	NA	9.73621	9.95894	0
TCGA-85-7843	LUSC	NA	NA	9.14925	11.0947	0
TCGA-85-7844	LUSC	NA	NA	8.83701	10.6681	0
TCGA-85-7950	LUSC	NA	NA	9.24424	10.7029	0
TCGA-85-8048	LUSC	NA	NA	9.59993	10.193	0
TCGA-85-8049	LUSC	NA	NA	8.67503	10.0195	0
TCGA-85-8052	LUSC	NA	NA	9.51795	11.0221	0
TCGA-85-8070	LUSC	NA	NA	10.0559	10.8553	0
TCGA-85-8071	LUSC	NA	NA	9.94594	10.9512	0
TCGA-85-8072	LUSC	NA	NA	9.55782	10.2921	0
TCGA-85-8276	LUSC	NA	NA	9.28631	10.4275	0
TCGA-85-8277	LUSC	NA	NA	9.11779	11.0653	1
TCGA-85-8287	LUSC	NA	NA	9.03259	10.2267	0
TCGA-85-8288	LUSC	NA	NA	8.99809	11.2684	0
TCGA-85-8350	LUSC	NA	NA	10.1882	11.0097	0
TCGA-85-8351	LUSC	NA	NA	9.25894	10.8622	0
TCGA-85-8352	LUSC	NA	NA	9.43457	10.9285	0
TCGA-85-8353	LUSC	NA	NA	9.02198	9.6979	0
TCGA-85-8354	LUSC	NA	NA	10.0329	10.4419	0
TCGA-85-8355	LUSC	NA	NA	9.02946	9.78103	0
TCGA-85-8479	LUSC	NA	NA	9.65691	10.1428	0
TCGA-85-8481	LUSC	NA	NA	9.04715	9.63097	0
TCGA-85-8580	LUSC	NA	NA	8.86206	10.8013	0
TCGA-85-8582	LUSC	NA	NA	8.76254	10.1795	0
TCGA-85-8584	LUSC	NA	NA	9.9489	11.4643	0
TCGA-85-8664	LUSC	NA	NA	10.0774	11.1408	0
TCGA-85-8666	LUSC	NA	NA	9.02564	10.6273	0
TCGA-85-A4CL	LUSC	NA	NA	10.2693	10.3779	0
TCGA-85-A4CN	LUSC	NA	NA	9.69396	10.4575	0
TCGA-85-A4JB	LUSC	NA	NA	8.95104	10.2829	0
TCGA-85-A4JC	LUSC	NA	NA	9.84667	10.5581	0
TCGA-85-A4PA	LUSC	NA	NA	8.90608	9.60062	0
TCGA-85-A4QQ	LUSC	NA	NA	9.12025	10.0576	0
TCGA-85-A4QR	LUSC	NA	NA	10.0952	11.0815	0
TCGA-85-A50M	LUSC	NA	NA	8.14209	9.18655	0
TCGA-85-A50Z	LUSC	NA	NA	8.67509	10.5316	0
TCGA-85-A510	LUSC	NA	NA	10.3652	11.2808	0
TCGA-85-A511	LUSC	NA	NA	9.09925	10.2883	0
TCGA-85-A512	LUSC	NA	NA	10.0474	10.7206	0
TCGA-85-A513	LUSC	NA	NA	8.41486	9.09905	0
TCGA-85-A53L	LUSC	NA	NA	9.63679	10.2976	0
TCGA-85-A5B5	LUSC	NA	NA	9.87317	10.2872	0
TCGA-86-6562	LUAD	68	0.25	9.64231	8.89628	0
TCGA-86-6851	LUAD	963	0.144341	8.94801	9.52239	0
TCGA-86-7701	LUAD	220	0.154545	9.55934	9.37244	0
TCGA-86-7711	LUAD	241	0.195021	9.08159	10.243	0
TCGA-86-7713	LUAD	151	0.198675	9.36451	10.4243	0
TCGA-86-7714	LUAD	87	0.252874	8.57584	9.28554	0
TCGA-86-7953	LUAD	54	0.222222	9.16947	10.7789	0
TCGA-86-7954	LUAD	244	0.22541	9.85719	9.99257	0
TCGA-86-7955	LUAD	317	0.201893	9.61489	9.78659	0
TCGA-86-8054	LUAD	219	0.178082	9.10197	10.3939	0
TCGA-86-8055	LUAD	60	0.266667	9.1132	9.42527	0
TCGA-86-8056	LUAD	316	0.313291	9.26021	9.12531	0
TCGA-86-8073	LUAD	1659	0.155515	8.95308	9.47046	0
TCGA-86-8074	LUAD	71	0.28169	8.94919	9.84988	0
TCGA-86-8075	LUAD	48	0.333333	9.13128	9.58583	0
TCGA-86-8076	LUAD	77	0.272727	8.96381	9.3123	0
TCGA-86-8278	LUAD	124	0.419355	8.96401	8.85997	0
TCGA-86-8279	LUAD	530	0.128302	8.75291	9.42253	0
TCGA-86-8280	LUAD	59	0.338983	8.69739	9.38318	0
TCGA-86-8281	LUAD	283	0.190813	9.35753	9.18012	0
TCGA-86-8358	LUAD	1087	0.152714	9.12843	11.1538	0
TCGA-86-8359	LUAD	160	0.18125	10.4478	9.5871	0
TCGA-86-8585	LUAD	562	0.176157	9.59857	10.1468	0
TCGA-86-8668	LUAD	35	0.2	8.12421	9.13762	0
TCGA-86-8669	LUAD	140	0.185714	10.1346	9.72816	0
TCGA-86-8671	LUAD	58	0.258621	8.85104	9.20093	0
TCGA-86-8672	LUAD	311	0.212219	9.52621	9.49052	0
TCGA-86-8673	LUAD	506	0.20751	9.88308	10.0882	0
TCGA-86-8674	LUAD	302	0.192053	9.94865	9.84136	0
TCGA-86-A456	LUAD	395	0.205063	8.94104	9.01217	0
TCGA-86-A4D0	LUAD	241	0.128631	10.0849	11.1944	0
TCGA-86-A4JF	LUAD	1344	0.265625	8.41201	10.0755	0
TCGA-86-A4P7	LUAD	76	0.368421	9.10279	9.27948	0
TCGA-86-A4P8	LUAD	2	0.5	8.52107	8.61631	0
TCGA-90-6837	LUSC	NA	NA	9.48966	10.0743	0
TCGA-90-7766	LUSC	NA	NA	9.29278	10.8494	0
TCGA-90-7767	LUSC	NA	NA	8.64942	10.7209	0
TCGA-90-7769	LUSC	NA	NA	9.7938	10.8239	0
TCGA-90-7964	LUSC	NA	NA	9.16193	10.3338	0
TCGA-90-A4ED	LUSC	NA	NA	9.01822	9.56199	0
TCGA-90-A4EE	LUSC	NA	NA	9.89901	11.2197	0
TCGA-90-A59Q	LUSC	NA	NA	9.34459	10.0745	0
TCGA-91-6828	LUAD	322	0.152174	9.14807	9.55882	0
TCGA-91-6829	LUAD	656	0.178354	8.53803	10.1196	0
TCGA-91-6830	LUAD	316	0.389241	9.43772	10.0211	0
TCGA-91-6831	LUAD	294	0.204082	9.51038	11.0785	0
TCGA-91-6835	LUAD	108	0.231481	8.99863	9.59753	0
TCGA-91-6836	LUAD	480	0.183333	9.80932	10.9816	0
TCGA-91-6840	LUAD	112	0.267857	9.17974	10.4216	1
TCGA-91-6847	LUAD	87	0.218391	8.7645	10.6377	1
TCGA-91-6848	LUAD	641	0.196568	9.06153	10.0097	0
TCGA-91-6849	LUAD	116	0.172414	9.01779	8.68108	0
TCGA-91-7771	LUAD	239	0.259414	9.49185	9.26142	0
TCGA-91-8496	LUAD	38	0.368421	9.39604	9.38271	0
TCGA-91-8497	LUAD	51	0.27451	9.20563	9.41456	0
TCGA-91-8499	LUAD	295	0.257627	9.88359	11.5461	0
TCGA-91-A4BC	LUAD	484	0.140496	9.41249	10.5626	0
TCGA-91-A4BD	LUAD	18	0.388889	9.34928	9.15219	0
TCGA-92-7340	LUSC	NA	NA	9.43332	10.6507	0
TCGA-92-7341	LUSC	NA	NA	8.40377	11.3719	0
TCGA-92-8063	LUSC	NA	NA	9.44916	11.0251	0
TCGA-92-8064	LUSC	NA	NA	9.26632	10.394	1
TCGA-92-8065	LUSC	NA	NA	9.7843	10.1131	0
TCGA-93-7347	LUAD	120	0.241667	8.65836	9.31371	0
TCGA-93-7348	LUAD	112	0.232143	9.66596	8.83615	0
TCGA-93-8067	LUAD	563	0.394316	9.9029	10.4488	0
TCGA-93-A4JN	LUAD	83	0.313253	8.63725	10.1994	0
TCGA-93-A4JO	LUAD	52	0.269231	8.70877	9.2172	0
TCGA-93-A4JP	LUAD	71	0.309859	8.71192	9.24538	0
TCGA-93-A4JQ	LUAD	148	0.256757	9.47013	9.86216	0
TCGA-94-7033	LUSC	NA	NA	10.0277	9.33115	0
TCGA-94-7557	LUSC	NA	NA	9.67312	10.8169	0
TCGA-94-7943	LUSC	NA	NA	10.0174	11.0701	1
TCGA-94-8035	LUSC	NA	NA	10.1461	11.08	0
TCGA-94-8490	LUSC	NA	NA	9.71018	11.063	0
TCGA-94-8491	LUSC	NA	NA	9.60534	10.3327	0
TCGA-94-A4VJ	LUSC	NA	NA	8.39786	9.49128	0
TCGA-94-A5I4	LUSC	NA	NA	9.58625	11.0139	0
TCGA-94-A5I6	LUSC	NA	NA	8.88357	10.5878	0
TCGA-95-7039	LUAD	1280	0.158594	9.1182	9.30736	0
TCGA-95-7043	LUAD	1110	0.155856	9.43001	9.87507	0
TCGA-95-7562	LUAD	371	0.132075	8.74512	10.5034	0
TCGA-95-7567	LUAD	929	0.155005	9.60113	9.669	0
TCGA-95-7944	LUAD	273	0.369963	9.14996	10.0897	0
TCGA-95-7947	LUAD	555	0.302703	9.21301	9.10026	0
TCGA-95-7948	LUAD	165	0.393939	9.28543	9.30807	0
TCGA-95-8039	LUAD	109	0.247706	9.21859	9.18746	0
TCGA-95-8494	LUAD	107	0.373832	9.55105	9.9124	0
TCGA-95-A4VK	LUAD	253	0.158103	9.34012	9.74234	0
TCGA-95-A4VN	LUAD	476	0.172269	7.90645	9.56206	0
TCGA-95-A4VP	LUAD	120	0.158333	10.1948	9.08354	0
TCGA-96-7544	LUSC	NA	NA	8.94788	10.2331	0
TCGA-96-7545	LUSC	NA	NA	9.03528	9.91276	1
TCGA-96-8169	LUSC	NA	NA	9.27543	9.9447	0
TCGA-96-8170	LUSC	NA	NA	9.36179	9.93667	0
TCGA-96-A4JK	LUSC	NA	NA	9.16984	10.9983	0
TCGA-96-A4JL	LUSC	NA	NA	9.43118	10.455	0
TCGA-97-7546	LUAD	285	0.161404	8.20401	9.06472	0
TCGA-97-7547	LUAD	193	0.222798	7.74165	8.72534	0
TCGA-97-7552	LUAD	39	0.179487	8.64863	9.11458	0
TCGA-97-7553	LUAD	53	0.283019	8.32647	9.28371	0
TCGA-97-7554	LUAD	460	0.18913	8.71325	9.30222	0
TCGA-97-7937	LUAD	472	0.144068	8.89389	9.65813	0
TCGA-97-7938	LUAD	415	0.149398	8.77102	9.45308	0
TCGA-97-7941	LUAD	105	0.266667	9.14481	9.02809	0
TCGA-97-8171	LUAD	53	0.264151	9.8059	10.34	1
TCGA-97-8172	LUAD	265	0.181132	9.27305	9.14539	0
TCGA-97-8174	LUAD	173	0.150289	8.55413	9.1083	0
TCGA-97-8175	LUAD	50	0.3	9.50089	9.31957	0
TCGA-97-8176	LUAD	157	0.280255	9.86383	10.3255	0
TCGA-97-8177	LUAD	72	0.291667	9.26373	9.69041	0
TCGA-97-8179	LUAD	170	0.135294	8.59576	9.08346	0
TCGA-97-8547	LUAD	66	0.348485	9.38365	9.26473	0
TCGA-97-8552	LUAD	26	0.307692	9.20069	8.34159	0
TCGA-97-A4LX	LUAD	188	0.143617	8.59664	9.12362	0
TCGA-97-A4M0	LUAD	381	0.2021	9.9572	9.02257	0
TCGA-97-A4M1	LUAD	48	0.229167	8.85958	8.78309	0
TCGA-97-A4M2	LUAD	31	0.193548	9.0493	9.02683	0
TCGA-97-A4M3	LUAD	205	0.165854	9.57032	9.83607	0
TCGA-97-A4M5	LUAD	158	0.43038	9.10614	9.18091	0
TCGA-97-A4M6	LUAD	38	0.342105	9.85146	8.58414	0
TCGA-97-A4M7	LUAD	311	0.157556	9.20149	9.65112	0
TCGA-98-7454	LUSC	NA	NA	8.64538	9.35695	0
TCGA-98-8020	LUSC	NA	NA	8.70166	10.2341	0
TCGA-98-8021	LUSC	NA	NA	9.2771	9.9178	0
TCGA-98-8022	LUSC	NA	NA	9.40689	10.1447	1
TCGA-98-8023	LUSC	NA	NA	9.97861	11.1076	0
TCGA-98-A538	LUSC	NA	NA	8.53862	10.6587	0
TCGA-98-A539	LUSC	NA	NA	9.42308	10.2332	0
TCGA-98-A53A	LUSC	NA	NA	8.64279	11.1894	0
TCGA-98-A53B	LUSC	NA	NA	9.37921	10.8815	0
TCGA-98-A53C	LUSC	NA	NA	8.77363	9.16204	0
TCGA-98-A53D	LUSC	NA	NA	8.11431	8.77344	0
TCGA-98-A53H	LUSC	NA	NA	8.63908	9.06972	0
TCGA-98-A53I	LUSC	NA	NA	9.58631	10.4114	0
TCGA-98-A53J	LUSC	NA	NA	9.24971	10.1883	0
TCGA-99-7458	LUAD	486	0.18107	7.90095	8.72589	0
TCGA-99-8025	LUAD	515	0.267961	9.20001	9.48401	0
TCGA-99-8028	LUAD	559	0.128801	9.49715	8.8787	0
TCGA-99-8032	LUAD	442	0.144796	9.79607	9.69961	0
TCGA-99-8033	LUAD	199	0.251256	9.50184	10.3878	0
TCGA-99-AA5R	LUAD	NA	NA	8.82781	8.92286	0
TCGA-A1-A0SB	BRCA	NA	NA	8.69509	9.86223	0
TCGA-A1-A0SD	BRCA	27	0.222222	9.32672	10.3583	0
TCGA-A1-A0SE	BRCA	19	0.210526	9.13038	9.44909	0
TCGA-A1-A0SF	BRCA	NA	NA	9.73051	9.39635	0
TCGA-A1-A0SG	BRCA	NA	NA	9.4209	10.0526	0
TCGA-A1-A0SH	BRCA	63	0.365079	9.18621	9.75589	0
TCGA-A1-A0SI	BRCA	NA	NA	9.17636	9.93358	0
TCGA-A1-A0SJ	BRCA	27	0.222222	8.22684	9.91489	0
TCGA-A1-A0SK	BRCA	105	0.219048	9.02153	11.938	0
TCGA-A1-A0SM	BRCA	19	0.105263	8.99285	9.59087	1
TCGA-A1-A0SN	BRCA	NA	NA	9.21891	10.3128	0
TCGA-A1-A0SO	BRCA	177	0.242938	9.02656	11.749	0
TCGA-A1-A0SP	BRCA	31	0.419355	8.88403	11.2764	0
TCGA-A1-A0SQ	BRCA	NA	NA	9.18724	10.6259	0
TCGA-A2-A04N	BRCA	20	0.1	9.11137	10.0333	0
TCGA-A2-A04P	BRCA	106	0.188679	9.25134	9.86427	1
TCGA-A2-A04Q	BRCA	12	0.333333	9.32668	10.3571	1
TCGA-A2-A04R	BRCA	83	0.180723	9.01371	10.0556	0
TCGA-A2-A04T	BRCA	NA	NA	9.51429	10.9621	1
TCGA-A2-A04U	BRCA	74	0.216216	9.64685	10.9464	0
TCGA-A2-A04V	BRCA	27	0.296296	9.28106	10.0698	0
TCGA-A2-A04W	BRCA	28	0.321429	9.75213	9.42704	0
TCGA-A2-A04X	BRCA	22	0.545455	9.92076	10.4063	1
TCGA-A2-A04Y	BRCA	41	0.170732	9.58587	10.2501	0
TCGA-A2-A0CK	BRCA	NA	NA	9.74718	9.5889	0
TCGA-A2-A0CL	BRCA	9	0.333333	8.68964	10.4261	0
TCGA-A2-A0CM	BRCA	54	0.240741	8.59355	10.1768	1
TCGA-A2-A0CO	BRCA	NA	NA	9.32569	9.09277	0
TCGA-A2-A0CP	BRCA	50	0.26	9.02823	9.79562	0
TCGA-A2-A0CQ	BRCA	36	0.166667	9.89297	9.71979	0
TCGA-A2-A0CR	BRCA	NA	NA	9.70971	9.58376	0
TCGA-A2-A0CS	BRCA	21	0.238095	9.54786	10.3797	0
TCGA-A2-A0CT	BRCA	71	0.295775	10.1125	10.7233	0
TCGA-A2-A0CU	BRCA	20	0.25	9.18368	9.77715	0
TCGA-A2-A0CV	BRCA	9	0.111111	8.89284	9.54215	0
TCGA-A2-A0CW	BRCA	59	0.271186	10.1333	11.3301	0
TCGA-A2-A0CX	BRCA	98	0.5	9.87584	11.1212	0
TCGA-A2-A0CY	BRCA	NA	NA	9.93987	11.2625	0
TCGA-A2-A0CZ	BRCA	14	0.214286	8.61261	9.21154	0
TCGA-A2-A0D0	BRCA	65	0.230769	8.89141	12.0818	1
TCGA-A2-A0D1	BRCA	54	0.314815	8.62591	9.5281	1
TCGA-A2-A0D2	BRCA	69	0.231884	8.16402	10.8504	1
TCGA-A2-A0D3	BRCA	16	0.1875	8.13025	10.2918	0
TCGA-A2-A0D4	BRCA	27	0.333333	9.76724	10.8049	1
TCGA-A2-A0EM	BRCA	22	0.318182	8.94514	10.1137	0
TCGA-A2-A0EN	BRCA	20	0.3	8.92025	9.10982	0
TCGA-A2-A0EO	BRCA	18	0.277778	9.02757	9.64812	0
TCGA-A2-A0EP	BRCA	NA	NA	8.82809	9.23281	0
TCGA-A2-A0EQ	BRCA	61	0.295082	8.8703	10.4103	0
TCGA-A2-A0ER	BRCA	25	0.24	8.27095	10.4491	0
TCGA-A2-A0ES	BRCA	7	0	8.67212	9.57708	0
TCGA-A2-A0ET	BRCA	26	0.153846	8.5699	10.6318	0
TCGA-A2-A0EU	BRCA	20	0.1	8.73181	10.8536	0
TCGA-A2-A0EV	BRCA	40	0.35	9.18687	9.74643	0
TCGA-A2-A0EW	BRCA	15	0.2	8.65885	9.35608	0
TCGA-A2-A0EX	BRCA	23	0.304348	9.18565	9.70174	0
TCGA-A2-A0EY	BRCA	137	0.459854	9.50879	9.50516	1
TCGA-A2-A0ST	BRCA	10	0.4	8.63752	9.80348	0
TCGA-A2-A0SU	BRCA	22	0.363636	9.38206	10.1116	0
TCGA-A2-A0SV	BRCA	33	0.30303	9.06125	10.6745	0
TCGA-A2-A0SW	BRCA	36	0.305556	9.62758	10.1237	0
TCGA-A2-A0SX	BRCA	33	0.212121	8.32557	10.4118	0
TCGA-A2-A0SY	BRCA	111	0.369369	8.59919	9.77127	0
TCGA-A2-A0T0	BRCA	127	0.19685	8.8238	10.0431	0
TCGA-A2-A0T1	BRCA	10	0.2	8.7975	10.5143	0
TCGA-A2-A0T2	BRCA	31	0.16129	8.30828	9.89121	0
TCGA-A2-A0T3	BRCA	39	0.25641	8.66855	10.1628	0
TCGA-A2-A0T4	BRCA	24	0.25	8.89286	10.4096	0
TCGA-A2-A0T5	BRCA	21	0.238095	9.17244	10.7635	0
TCGA-A2-A0T6	BRCA	27	0.296296	8.2033	9.48897	0
TCGA-A2-A0T7	BRCA	19	0.315789	8.91154	10.3065	0
TCGA-A2-A0YC	BRCA	15	0.0666667	8.98131	9.94176	0
TCGA-A2-A0YD	BRCA	28	0.5	9.15831	9.83923	0
TCGA-A2-A0YE	BRCA	NA	NA	9.00457	9.64682	0
TCGA-A2-A0YF	BRCA	18	0.111111	9.39493	10.0636	0
TCGA-A2-A0YG	BRCA	45	0.4	9.49632	10.5087	1
TCGA-A2-A0YH	BRCA	31	0.516129	9.78629	10.2985	0
TCGA-A2-A0YI	BRCA	7	0	8.57492	9.92654	0
TCGA-A2-A0YJ	BRCA	25	0.2	9.09483	10.2964	0
TCGA-A2-A0YK	BRCA	9	0.555556	8.66792	9.7416	0
TCGA-A2-A0YL	BRCA	5	0.4	8.68295	10.0051	0
TCGA-A2-A0YM	BRCA	53	0.245283	8.98871	10.7798	0
TCGA-A2-A0YT	BRCA	47	0.319149	9.53729	10.4485	0
TCGA-A2-A1FV	BRCA	NA	NA	8.94377	9.93213	0
TCGA-A2-A1FW	BRCA	NA	NA	9.8892	10.2771	0
TCGA-A2-A1FX	BRCA	NA	NA	9.25741	10.3387	0
TCGA-A2-A1FZ	BRCA	NA	NA	8.88665	9.46909	0
TCGA-A2-A1G0	BRCA	NA	NA	9.1837	9.14233	0
TCGA-A2-A1G1	BRCA	NA	NA	8.92404	10.3009	0
TCGA-A2-A1G4	BRCA	NA	NA	8.96628	10.5729	0
TCGA-A2-A1G6	BRCA	NA	NA	9.01498	9.57082	0
TCGA-A2-A259	BRCA	NA	NA	8.33482	9.92487	1
TCGA-A2-A25A	BRCA	NA	NA	9.20267	9.35511	0
TCGA-A2-A25B	BRCA	NA	NA	9.7694	10.1343	1
TCGA-A2-A25C	BRCA	NA	NA	9.44401	9.961	0
TCGA-A2-A25D	BRCA	NA	NA	9.61976	10.4201	0
TCGA-A2-A25E	BRCA	NA	NA	9.6001	10.8798	0
TCGA-A2-A25F	BRCA	NA	NA	8.35798	10.1418	0
TCGA-A2-A3KC	BRCA	NA	NA	9.38031	10.2378	1
TCGA-A2-A3KD	BRCA	NA	NA	8.19582	10.2715	0
TCGA-A2-A3XS	BRCA	NA	NA	9.34072	10.218	0
TCGA-A2-A3XT	BRCA	NA	NA	8.44196	10.5205	0
TCGA-A2-A3XU	BRCA	NA	NA	9.62416	10.8091	0
TCGA-A2-A3XV	BRCA	NA	NA	11.1458	9.48408	0
TCGA-A2-A3XW	BRCA	NA	NA	9.76538	10.3515	0
TCGA-A2-A3XX	BRCA	NA	NA	9.05877	10.025	1
TCGA-A2-A3XY	BRCA	NA	NA	8.41002	10.0404	0
TCGA-A2-A3XZ	BRCA	NA	NA	9.90486	10.1407	0
TCGA-A2-A3Y0	BRCA	NA	NA	10.2416	10.494	1
TCGA-A2-A4RW	BRCA	NA	NA	9.34591	10.0984	0
TCGA-A2-A4RX	BRCA	NA	NA	7.69564	9.86508	0
TCGA-A2-A4RY	BRCA	NA	NA	8.99808	9.43551	0
TCGA-A2-A4S0	BRCA	NA	NA	8.57507	10.3657	0
TCGA-A2-A4S1	BRCA	NA	NA	9.01014	8.82225	0
TCGA-A2-A4S2	BRCA	NA	NA	8.75277	9.31784	0
TCGA-A2-A4S3	BRCA	NA	NA	9.93994	10.9015	0
TCGA-A3-3306	KIRC	NA	NA	8.47407	9.00555	0
TCGA-A3-3307	KIRC	NA	NA	8.34328	9.70222	0
TCGA-A3-3308	KIRC	206	0.165049	8.68801	9.49697	1
TCGA-A3-3311	KIRC	55	0.272727	8.92751	10.3022	0
TCGA-A3-3313	KIRC	255	0.282353	8.74265	10.1754	0
TCGA-A3-3316	KIRC	277	0.33213	8.06624	9.51565	0
TCGA-A3-3317	KIRC	74	0.256757	8.79186	9.24889	0
TCGA-A3-3319	KIRC	209	0.315789	10.126	10.6105	0
TCGA-A3-3320	KIRC	211	0.222749	8.17909	9.75993	0
TCGA-A3-3322	KIRC	115	0.365217	8.00385	9.58167	0
TCGA-A3-3323	KIRC	47	0.255319	8.71176	9.60956	0
TCGA-A3-3324	KIRC	NA	NA	8.44058	9.63259	1
TCGA-A3-3325	KIRC	NA	NA	8.71143	10.1746	0
TCGA-A3-3326	KIRC	53	0.226415	8.48642	9.7172	0
TCGA-A3-3328	KIRC	NA	NA	9.2231	10.7067	0
TCGA-A3-3329	KIRC	NA	NA	8.46194	9.75818	0
TCGA-A3-3331	KIRC	135	0.207407	8.58521	9.63185	0
TCGA-A3-3335	KIRC	NA	NA	8.75383	9.8907	0
TCGA-A3-3343	KIRC	NA	NA	8.50817	9.59143	0
TCGA-A3-3346	KIRC	355	0.507042	9.17933	9.94557	0
TCGA-A3-3347	KIRC	NA	NA	9.29058	10.1645	0
TCGA-A3-3349	KIRC	NA	NA	8.87049	9.528	0
TCGA-A3-3351	KIRC	NA	NA	8.79955	9.38451	0
TCGA-A3-3352	KIRC	NA	NA	8.79963	10.0531	0
TCGA-A3-3357	KIRC	102	0.254902	8.73276	9.24303	0
TCGA-A3-3358	KIRC	NA	NA	9.20305	9.89526	0
TCGA-A3-3359	KIRC	NA	NA	8.73596	9.50896	0
TCGA-A3-3362	KIRC	NA	NA	8.8091	9.52244	0
TCGA-A3-3363	KIRC	440	0.365909	8.52854	10.3829	0
TCGA-A3-3365	KIRC	199	0.341709	8.19115	9.45576	0
TCGA-A3-3367	KIRC	82	0.207317	8.39808	9.66821	0
TCGA-A3-3370	KIRC	43	0.186047	8.63557	9.91206	1
TCGA-A3-3372	KIRC	99	0.252525	8.29059	9.2459	1
TCGA-A3-3373	KIRC	72	0.305556	8.44566	9.33857	0
TCGA-A3-3374	KIRC	470	0.319149	9.71893	10.8347	0
TCGA-A3-3376	KIRC	67	0.253731	8.40893	9.27658	0
TCGA-A3-3378	KIRC	151	0.258278	8.76898	9.52433	0
TCGA-A3-3380	KIRC	137	0.19708	9.0943	10.7026	0
TCGA-A3-3382	KIRC	290	0.248276	8.50501	9.45583	0
TCGA-A3-3383	KIRC	76	0.236842	9.51938	10.118	0
TCGA-A3-3385	KIRC	64	0.1875	8.7617	9.77695	0
TCGA-A3-3387	KIRC	NA	NA	8.87768	9.86464	1
TCGA-A3-A6NI	KIRC	NA	NA	9.76919	10.2447	0
TCGA-A3-A6NJ	KIRC	NA	NA	8.66022	9.16347	0
TCGA-A3-A6NL	KIRC	NA	NA	9.02875	9.22971	0
TCGA-A3-A6NN	KIRC	NA	NA	8.55736	9.73119	0
TCGA-A3-A8CQ	KIRC	NA	NA	8.6609	9.35195	0
TCGA-A3-A8OU	KIRC	NA	NA	8.99996	9.40811	0
TCGA-A3-A8OV	KIRC	NA	NA	9.32224	9.54965	0
TCGA-A3-A8OW	KIRC	NA	NA	8.92878	9.23424	0
TCGA-A3-A8OX	KIRC	NA	NA	8.84083	9.88209	0
TCGA-A4-7286	KIRP	44	0.159091	9.66588	10.3202	0
TCGA-A4-7287	KIRP	47	0.340426	9.86745	10.6018	0
TCGA-A4-7288	KIRP	76	0.171053	8.89856	10.2926	0
TCGA-A4-7583	KIRP	628	0.0191083	8.69841	9.91933	0
TCGA-A4-7584	KIRP	74	0.256757	9.3271	10.5271	0
TCGA-A4-7585	KIRP	74	0.189189	8.88469	9.57604	0
TCGA-A4-7732	KIRP	52	0.346154	10.0564	10.0479	0
TCGA-A4-7734	KIRP	48	0.208333	8.93184	9.6971	0
TCGA-A4-7828	KIRP	28	0.321429	9.12368	9.61665	0
TCGA-A4-7915	KIRP	33	0.393939	9.33749	10.1986	0
TCGA-A4-7996	KIRP	76	0.368421	8.46563	10.2019	0
TCGA-A4-7997	KIRP	78	0.282051	9.02842	10.106	0
TCGA-A4-8098	KIRP	79	0.189873	9.27511	10.6481	0
TCGA-A4-8310	KIRP	81	0.197531	9.58184	10.6155	0
TCGA-A4-8311	KIRP	53	0.188679	8.93578	9.49259	0
TCGA-A4-8312	KIRP	13	0.307692	9.36853	10.4351	0
TCGA-A4-8515	KIRP	64	0.1875	8.52234	9.98679	0
TCGA-A4-8516	KIRP	92	0.141304	9.49944	10.5624	0
TCGA-A4-8517	KIRP	74	0.216216	9.2378	10.7757	0
TCGA-A4-8518	KIRP	10	0.3	9.44457	10.8661	0
TCGA-A4-8630	KIRP	48	0.270833	8.65945	9.66464	0
TCGA-A4-A48D	KIRP	117	0.299145	8.70881	9.8676	0
TCGA-A4-A4ZT	KIRP	70	0.128571	9.45661	10.5218	0
TCGA-A4-A57E	KIRP	85	0.235294	9.59585	10.0511	0
TCGA-A4-A5DU	KIRP	39	0.153846	9.71932	10.442	0
TCGA-A4-A5XZ	KIRP	80	0.25	9.13509	10.5845	0
TCGA-A4-A5Y0	KIRP	53	0.188679	9.4103	9.93195	0
TCGA-A4-A5Y1	KIRP	81	0.296296	8.21318	10.4582	0
TCGA-A4-A6HP	KIRP	127	0.15748	10.1785	10.5184	0
TCGA-A4-A772	KIRP	NA	NA	9.65322	10.3691	0
TCGA-A4-A7UZ	KIRP	NA	NA	9.70914	9.53061	0
TCGA-A5-A0G3	UCEC	178	0.213483	NA	NA	0
TCGA-A5-A0G5	UCEC	362	0.256906	NA	NA	0
TCGA-A5-A0G9	UCEC	383	0.232376	NA	NA	1
TCGA-A5-A0GA	UCEC	450	0.215556	NA	NA	1
TCGA-A5-A0GB	UCEC	684	0.273392	NA	NA	0
TCGA-A5-A0GD	UCEC	209	0.172249	NA	NA	0
TCGA-A5-A0GE	UCEC	207	0.207729	NA	NA	1
TCGA-A5-A0GH	UCEC	473	0.283298	NA	NA	0
TCGA-A5-A0GI	UCEC	1022	0.253425	NA	NA	0
TCGA-A5-A0GJ	UCEC	141	0.22695	NA	NA	1
TCGA-A5-A0GM	UCEC	187	0.235294	NA	NA	0
TCGA-A5-A0GN	UCEC	186	0.241935	NA	NA	0
TCGA-A5-A0GP	UCEC	1498	0.143525	NA	NA	0
TCGA-A5-A0GQ	UCEC	261	0.191571	NA	NA	0
TCGA-A5-A0GU	UCEC	123	0.219512	NA	NA	0
TCGA-A5-A0GV	UCEC	166	0.228916	NA	NA	0
TCGA-A5-A0GW	UCEC	402	0.238806	NA	NA	0
TCGA-A5-A0GX	UCEC	231	0.268398	NA	NA	0
TCGA-A5-A0R6	UCEC	205	0.258537	NA	NA	0
TCGA-A5-A0R7	UCEC	219	0.228311	NA	NA	0
TCGA-A5-A0R8	UCEC	286	0.255245	NA	NA	0
TCGA-A5-A0R9	UCEC	197	0.177665	NA	NA	0
TCGA-A5-A0RA	UCEC	306	0.205882	NA	NA	0
TCGA-A5-A0VO	UCEC	357	0.215686	NA	NA	0
TCGA-A5-A0VP	UCEC	1382	0.186686	NA	NA	0
TCGA-A5-A0VQ	UCEC	357	0.322129	NA	NA	0
TCGA-A5-A1OH	UCEC	NA	NA	9.78403	10.0127	0
TCGA-A5-A2K2	UCEC	NA	NA	9.78442	10.1101	0
TCGA-A5-A2K3	UCEC	NA	NA	10.0336	9.90165	0
TCGA-A5-A2K4	UCEC	NA	NA	9.28428	9.89154	0
TCGA-A5-A2K5	UCEC	NA	NA	10.168	10.0509	0
TCGA-A5-A2K7	UCEC	NA	NA	9.20203	10.8728	0
TCGA-A5-A3LO	UCEC	NA	NA	9.44545	10.6172	0
TCGA-A5-A3LP	UCEC	NA	NA	8.97644	10.4413	0
TCGA-A5-A7WJ	UCEC	NA	NA	9.61567	9.94699	0
TCGA-A5-A7WK	UCEC	NA	NA	10.1022	10.1516	0
TCGA-A5-AB3J	UCEC	NA	NA	9.41728	9.44855	0
TCGA-A6-2675	COAD	NA	NA	8.6832	10.1011	0
TCGA-A6-2682	COAD	NA	NA	9.25013	10.8375	0
TCGA-A6-2684	COAD	NA	NA	8.90807	11.0128	0
TCGA-A6-2685	COAD	NA	NA	8.7351	10.385	0
TCGA-A6-2686	COAD	NA	NA	9.39413	11.2907	0
TCGA-A6-4105	COAD	NA	NA	9.41535	11.1999	0
TCGA-A6-5656	COAD	NA	NA	8.69635	10.3744	0
TCGA-A6-5657	COAD	NA	NA	8.66116	10.7267	0
TCGA-A6-5659	COAD	NA	NA	9.04249	10.7973	0
TCGA-A6-5660	COAD	NA	NA	8.76959	10.6912	0
TCGA-A6-5661	COAD	NA	NA	8.87684	10.7652	0
TCGA-A6-5662	COAD	NA	NA	9.41049	9.48994	0
TCGA-A6-5664	COAD	NA	NA	8.97301	10.9051	0
TCGA-A6-5665	COAD	NA	NA	8.81784	10.2037	0
TCGA-A6-5666	COAD	NA	NA	9.28551	11.0067	0
TCGA-A6-5667	COAD	NA	NA	8.96777	10.7256	0
[truncated: 7,711 more rows]

## Sheet: TCGA505_UDGstat_SMUG1.UNG_res
test_description	BLCA	BRCA	CRC	GBM	HNSC	KICH	KIRC	LGG	LUAD	LUSC	PRAD	SKCM	THCA	UCEC	fishers_pval
one-sided rank correlation betw. SMUG1 expr. and UDG_stat	0.561661	0.994619	0.948533	0.186842	0.673546	0.147445	0.793031	0.999939	0.170737	0.877078	0.751814	0.449934	0.559655	0.71528	0.937948
one-sided rank correlation betw. UNG expr. and UDG_stat	0.167304	0.0655539	0.527737	0.0985407	0.944435	0.0666556	0.887548	0.0984075	0.47037	0.098095	0.794605	0.226864	0.513761	0.444098	0.100704
one-sided rank correlation betw. product of SMUG1 and UNG expr. and UDG_stat	0.278992	0.695519	0.782266	0.0166839	0.967648	0.0666556	0.878244	0.927531	0.238159	0.44051	0.911548	0.388006	0.672042	0.553759	0.550283
one-sided wilcox. rank sum test, difference in UDG_stat level depending on SMUG1 mutation status	0.142857	0.203273	0.814348	0.888889	NA	NA	NA	NA	0.921739	NA	NA	0.0822426	NA	0.0212766	0.112779
one-sided wilcox. rank sum test, difference in UDG_stat level depending on SMUG1 mutation status (only including coding and splice site mutations)	NA	NA	0.904762	NA	NA	NA	NA	NA	NA	NA	NA	0.0526316	NA	0.0212766	0.03208

## Sheet: TCGAexome_UDGstat_SMUG1.UNG_res
test_description	ACC	BLCA	BRCA	CESC	CHOL	HNSC	KICH	KIRC	KIRP	LGG	LIHC	LUAD	PAAD	PCPG	PRAD	SKCM	THCA	UCEC	UCS	UVM	fishers_pval
one-sided rank correlation betw. SMUG1 expr. and UDG_stat	0.00115981	0.00105929	0.95927	0.386166	0.803024	0.801601	0.618693	0.833933	0.983554	0.991312	0.670587	0.0478547	0.344357	0.03725	0.77201	0.772219	0.505016	0.24881	0.780553	0.108407	0.0382957
one-sided rank correlation betw. UNG expr. and UDG_stat	0.0318481	0.292862	0.00615337	0.59705	0.516937	0.000914955	0.1742	0.771266	0.214584	0.205942	0.261995	0.0833942	0.0450184	0.235337	0.60659	0.938574	0.045843	0.84881	0.220447	0.291037	0.000514798
one-sided rank correlation betw. product of SMUG1 and UNG expr. and UDG_stat	0.000843367	0.00919887	0.310338	0.42775	0.635332	0.0153726	0.334535	0.920673	0.885902	0.848972	0.471819	0.0155387	0.158642	0.0522953	0.825443	0.942804	0.124482	0.702579	0.43348	0.161181	0.0024007
