# Supplementary material for: Non-coding cancer driver candidates identified with a sample- and position-specific model of the somatic mutation rate
Source: eLife journal article supplement (doi:10.7554/elife.21778), 2017-03-31
Supplement: supp [file elife-21778-supp-v2.zip › elife_poa_e21778_Supplementary_File_6.xlsx]

## Sheet: legend
General description
Results on correlation analysis between mutation status and survival data
For each element type, the top 50 ncdDetect candidates (or all significant) are analysed if more than four mutations are observed
Sheet number	Sheet name	Information
2	TCGA505_data_overview	overview of the 505 samples analysed in the 505 whole genome TCGA set
3	nc_TCGA505_survival_results	analysis of non-coding mutations (in either promoters, splice sites, 5' UTRs or 3' UTRs) from 505 whole genome TCGA samples
4	cds_TCGA505_survival_results	analysis of mutations in protein-coding exons from 505 whole genome TCGA samples
5	TCGAexome_data_overview	overview of the 5336 samples analysed in the TCGA exome data set (samples present in the 505 whole genome sample set have been removed)
6	nc_TCGAexome_survival_results	analysis of non-coding mutations (in either promoters, splice sites, 5' UTRs or 3' UTRs) from the 5336 TCGA exome samples
7	cds_TCGAexome_survival_results	analysis of mutations in protein-coding exons from the 5336 TCGA exome samples
Column keys for sheets 3, 4, 6, and 7
candidate	element id
element_type	promoter (prom), splice site (ss), 3' UTR (utr3), 5' UTR (utr5) or protein-coding exon (cds)
n_total_mutations_combined	number of observed mutations across cancer types and samples
n_types_combined	number of cancer types combined for Fisher's method
types_combined	cancer types combined for Fisher's method
combined_pvals	the cancer-type specific p-values that are combined with Fisher's method
fishers_pval	p-value obtained with Fisher's method
qval	q-value after correcting for multiple testing (Benjamini-Hochberg approach)
Column keys for sheets 2 and 5
cancer_type	the specific cancer type
all	the number of samples for each cancer type
mapped	the number of samples with clinical data
with_survival_data	the number of samples with survival data (clinical follow-up)
median_follow_up	the median follow up time (days)
mean_follow_up	the mean follow up time (days)
alive	the number of patients still alive at the end of the follow-up

## Sheet: TCGA505_data_overview
cancer_type	all	mapped	with_survival_data	median_follow_up	mean_follow_up	alive
BLCA	21	21	21	491	531	10
BRCA	96	96	96	1121	1494	16
COAD	42	28	28	573	678	8
GBM	26	26	26	464	512	22
HNSC	27	27	27	799	1151	10
KICH	15	15	15	2650	2373	3
KIRC	29	29	29	878	1310	9
LGG	18	18	18	1438	1579	6
LUAD	46	46	44	857	898	23
LUSC	45	45	45	835	1089	21
PRAD	20	20	20	1084	1042	0
SKCM	38	38	38	1394	2212	31
THCA	34	34	34	945	1207	2
UCEC	47	47	47	2000	1852	16

## Sheet: nc_TCGA505_survival_results
candidate	element_type	n_total_mutations_combined	n_types_combined	types_combined	combined_pvals	fishers_pval	qval
prom_gencode::HLA-DRB1::ENSG00000196126.6	prom	8	2	BRCA;LUAD	0.067954;0.000144	0.000122756	0.0196409
prom_gencode::ZNF717::ENSG00000227124.4	prom	13	2	BRCA;SKCM	0.00129;0.41271	0.00454827	0.363861
prom_gencode::OR1M1::ENSG00000170929.5	prom	5	1	UCEC	0.00704	0.00703689	0.372812
prom_gencode::PSG6::ENSG00000170848.11	prom	5	1	SKCM	0.00932	0.00932031	0.372812
utr3_gencode::MUC19::ENSG00000205592.9	utr3	65	7	BLCA;BRCA;COAD;LUAD;LUSC;SKCM;UCEC	0.794886;0.000264;0.111521;0.167077;0.977115;0.475989;0.397437	0.013049	0.417568
prom_gencode::FRG2B::ENSG00000225899.3	prom	31	6	BRCA;HNSC;LUAD;LUSC;SKCM;UCEC	0.84528;0.08102;0.60585;0.07451;0.40773;0.00433	0.0188805	0.430653
utr5_gencode::KCNK1::ENSG00000135750.10	utr5	4	1	SKCM	0.0192	0.0191726	0.430653
utr5_gencode::ZSCAN4::ENSG00000180532.6	utr5	5	1	COAD	0.0233	0.0232979	0.430653
prom_gencode::CD86::ENSG00000114013.11	prom	8	2	COAD;SKCM	0.0660;0.0667	0.0282789	0.430653
prom_gencode::ASXL2::ENSG00000143970.12	prom	9	1	SKCM	0.0302	0.0302369	0.430653
prom_gencode::ATP5H::ENSG00000167863.7	prom	5	1	SKCM	0.0311	0.0310511	0.430653
prom_gencode::OR51F2::ENSG00000176925.5	prom	4	1	SKCM	0.0339	0.0338787	0.430653
utr5_gencode::TBC1D29::ENSG00000266733.1	utr5	8	2	BRCA;SKCM	0.76181;0.00744	0.0349905	0.430653
prom_gencode::CDC20::ENSG00000117399.9	prom	8	1	SKCM	0.0447	0.0446583	0.510381
prom_gencode::ZNF324::ENSG00000083812.7	prom	8	1	SKCM	0.0545	0.0544642	0.572579
prom_gencode::C8orf44::ENSG00000213865.3	prom	7	1	SKCM	0.0573	0.0572579	0.572579
prom_gencode::MOCS3::ENSG00000124217.3	prom	4	1	SKCM	0.0615	0.0614692	0.577563
prom_gencode::BRDT::ENSG00000137948.14	prom	8	2	COAD;SKCM	0.3883;0.0322	0.0672598	0.577563
prom_gencode::TPTE::ENSG00000166157.12	prom	11	2	LUAD;SKCM	0.0311;0.4225	0.0700646	0.577563
utr5_gencode::ERGIC3::ENSG00000125991.14	utr5	4	1	SKCM	0.0741	0.0740929	0.577563
prom_gencode::OR4K17::ENSG00000176230.4	prom	4	1	SKCM	0.0758	0.0758052	0.577563
prom_gencode::C16orf91::ENSG00000174109.3	prom	4	1	SKCM	0.0857	0.0857427	0.623584
prom_gencode::PLEKHS1::ENSG00000148735.10	prom	15	3	BLCA;BRCA;SKCM	0.0551;0.4453;0.1711	0.0900517	0.626447
prom_gencode::GLYAT::ENSG00000149124.6	prom	11	2	COAD;LUSC	0.3182;0.0728	0.110431	0.679459
prom_gencode::TERT::ENSG00000164362.14	prom	68	5	BLCA;GBM;LGG;SKCM;THCA	0.3104;0.0730;0.6429;0.4455;0.0627	0.111238	0.679459
utr3_gencode::PSG6::ENSG00000170848.11	utr3	4	1	COAD	0.114	0.114014	0.679459
prom_gencode::RP11-67H2.1::ENSG00000253207.3	prom	9	2	LUAD;SKCM	0.0435;0.5612	0.115131	0.679459
prom_gencode::RNF219::ENSG00000152193.7	prom	8	2	HNSC;KICH	0.0657;0.3877	0.118905	0.679459
utr5_gencode::SDHD::ENSG00000204370.4	utr5	6	1	SKCM	0.129	0.129161	0.712615
utr3_gencode::LGSN::ENSG00000146166.12	utr3	18	3	COAD;LUSC;SKCM	0.525;0.078;0.188	0.136403	0.723687
prom_gencode::WDR74::ENSG00000133316.11	prom	14	3	BRCA;COAD;LUAD	0.0997;0.2280;0.3673	0.143908	0.723687
utr3_gencode::C10orf53::ENSG00000178645.8	utr3	13	2	COAD;SKCM	0.0656;0.5032	0.145651	0.723687
prom_gencode::C8orf44-SGK3::ENSG00000270024.1	prom	6	1	SKCM	0.157	0.157317	0.723687
prom_gencode::VCPIP1::ENSG00000175073.7	prom	6	1	SKCM	0.157	0.157317	0.723687
prom_gencode::RNF185::ENSG00000138942.11	prom	5	1	SKCM	0.163	0.163109	0.723687
prom_gencode::C21orf119::ENSG00000256073.2	prom	7	1	SKCM	0.173	0.172946	0.723687
prom_gencode::URB1::ENSG00000142207.5	prom	7	1	SKCM	0.173	0.172946	0.723687
utr3_gencode::RERG::ENSG00000134533.2	utr3	6	1	SKCM	0.176	0.175984	0.723687
prom_gencode::KATNB1::ENSG00000140854.8	prom	7	1	SKCM	0.179	0.179224	0.723687
prom_gencode::DPH3::ENSG00000154813.5	prom	6	1	SKCM	0.181	0.180922	0.723687
utr3_gencode::PSG1::ENSG00000231924.5	utr3	4	1	SKCM	0.189	0.1892	0.738343
utr3_gencode::DRD5::ENSG00000169676.4	utr3	5	1	COAD	0.213	0.212576	0.793599
prom_gencode::TRAF3IP3::ENSG00000009790.10	prom	5	1	SKCM	0.216	0.215652	0.793599
prom_gencode::OR10H2::ENSG00000171942.3	prom	4	1	SKCM	0.218	0.21824	0.793599
prom_gencode::AKR1D1::ENSG00000122787.10	prom	5	1	SKCM	0.225	0.224828	0.799387
utr3_gencode::C17orf105::ENSG00000231256.3	utr3	5	1	COAD	0.247	0.24724	0.827008
utr3_gencode::TXNDC8::ENSG00000204193.6	utr3	5	1	COAD	0.247	0.24724	0.827008
prom_gencode::UTP11L::ENSG00000183520.7	prom	6	1	SKCM	0.249	0.249221	0.827008
utr3_gencode::SGCZ::ENSG00000185053.8	utr3	11	2	COAD;SKCM	0.504;0.140	0.257972	0.827008
prom_gencode::FAM221B::ENSG00000204930.5	prom	4	1	UCEC	0.258	0.25844	0.827008
utr3_gencode::C7::ENSG00000112936.14	utr3	12	2	LUSC;SKCM	0.119;0.670	0.280668	0.837803
prom_gencode::OXNAD1::ENSG00000154814.9	prom	7	1	SKCM	0.287	0.286884	0.837803
prom_gencode::LGSN::ENSG00000146166.12	prom	4	1	SKCM	0.29	0.290381	0.837803
prom_gencode::RESP18::ENSG00000182698.7	prom	4	1	SKCM	0.303	0.303394	0.837803
utr3_gencode::ARMC4::ENSG00000169126.11	utr3	12	2	COAD;SKCM	0.126;0.707	0.303627	0.837803
utr3_gencode::SEC14L1::ENSG00000129657.10	utr3	13	2	BRCA;COAD	0.137;0.678	0.313139	0.837803
utr5_gencode::SERPINB7::ENSG00000166396.8	utr5	6	1	SKCM	0.322	0.321902	0.837803
prom_gencode::CCDC66::ENSG00000180376.12	prom	4	1	COAD	0.336	0.336283	0.837803
utr3_gencode::PBXIP1::ENSG00000163346.12	utr3	5	1	COAD	0.338	0.337614	0.837803
prom_gencode::NME8::ENSG00000086288.7	prom	5	1	COAD	0.341	0.341385	0.837803
utr3_gencode::TMEM128::ENSG00000132406.7	utr3	7	1	BRCA	0.346	0.346205	0.837803
prom_gencode::RP11-1C1.5::ENSG00000249160.1	prom	4	1	KICH	0.348	0.347612	0.837803
prom_gencode::CRP::ENSG00000132693.8	prom	6	1	SKCM	0.354	0.353887	0.837803
utr5_gencode::TAF11::ENSG00000064995.12	utr5	4	1	SKCM	0.355	0.355316	0.837803
prom_gencode::SIRPG::ENSG00000089012.10	prom	4	1	COAD	0.364	0.364135	0.837803
utr5_gencode::WDR74::ENSG00000133316.11	utr5	5	1	BLCA	0.367	0.366697	0.837803
utr3_gencode::ANKEF1::ENSG00000132623.11	utr3	4	1	SKCM	0.38	0.379588	0.837803
utr5_gencode::C16orf59::ENSG00000162062.10	utr5	7	1	SKCM	0.382	0.381594	0.837803
utr3_gencode::C12orf56::ENSG00000185306.8	utr3	4	1	COAD	0.388	0.388314	0.837803
utr5_gencode::HLA-F::ENSG00000204642.9	utr5	5	1	BRCA	0.399	0.39918	0.837803
utr5_gencode::PDCD2::ENSG00000071994.6	utr5	4	1	SKCM	0.4	0.400093	0.837803
prom_gencode::AP2A1::ENSG00000196961.8	prom	9	1	SKCM	0.404	0.403597	0.837803
utr5_gencode::MAP1S::ENSG00000130479.6	utr5	6	1	SKCM	0.404	0.403739	0.837803
prom_gencode::FTH1::ENSG00000167996.11	prom	9	1	SKCM	0.412	0.412414	0.837803
prom_gencode::TM4SF18::ENSG00000163762.2	prom	12	2	COAD;KIRC	0.654;0.223	0.426618	0.837803
prom_gencode::MUC4::ENSG00000145113.17	prom	4	1	COAD	0.436	0.436131	0.837803
utr3_gencode::EDN3::ENSG00000124205.11	utr3	6	1	SKCM	0.439	0.438782	0.837803
prom_gencode::MYT1L::ENSG00000186487.13	prom	19	4	COAD;LUAD;LUSC;SKCM	0.641;0.573;0.230;0.225	0.440821	0.837803
prom_gencode::AHSA1::ENSG00000100591.3	prom	5	1	SKCM	0.441	0.441477	0.837803
prom_gencode::VIPAS39::ENSG00000151445.11	prom	5	1	SKCM	0.441	0.441477	0.837803
prom_gencode::ALOX12B::ENSG00000179477.5	prom	4	1	KIRC	0.448	0.448331	0.837803
utr5_gencode::MTRNR2L13::ENSG00000270394.1	utr5	9	2	COAD;LUAD	0.21;0.77	0.456074	0.837803
prom_gencode::ACSM4::ENSG00000215009.5	prom	4	1	SKCM	0.458	0.458179	0.837803
prom_gencode::GOLGA2::ENSG00000167110.12	prom	8	1	SKCM	0.467	0.46746	0.837803
utr5_gencode::AC006372.1::ENSG00000236669.1	utr5	4	1	SKCM	0.469	0.468544	0.837803
utr3_gencode::TRIM55::ENSG00000147573.12	utr3	5	1	SKCM	0.471	0.471372	0.837803
prom_gencode::LRRC45::ENSG00000169683.3	prom	8	1	SKCM	0.473	0.473417	0.837803
prom_gencode::STRA13::ENSG00000169689.10	prom	8	1	SKCM	0.473	0.473417	0.837803
prom_gencode::TEX101::ENSG00000131126.14	prom	5	1	UCEC	0.482	0.481652	0.837803
utr5_gencode::COL21A1::ENSG00000124749.12	utr5	5	1	SKCM	0.485	0.484678	0.837803
prom_gencode::AP003733.1::ENSG00000269089.1	prom	8	1	SKCM	0.493	0.493055	0.837803
prom_gencode::DEPDC4::ENSG00000166153.12	prom	6	1	SKCM	0.497	0.496733	0.837803
utr5_gencode::KIAA1737::ENSG00000198894.3	utr5	5	1	SKCM	0.502	0.501985	0.837803
prom_gencode::ANKRD16::ENSG00000134461.11	prom	6	1	SKCM	0.503	0.503151	0.837803
prom_gencode::GFRAL::ENSG00000187871.2	prom	4	1	SKCM	0.505	0.505216	0.837803
prom_gencode::CCL26::ENSG00000006606.4	prom	5	1	COAD	0.519	0.518768	0.837803
prom_gencode::OR1L1::ENSG00000173679.2	prom	4	1	COAD	0.525	0.524704	0.837803
utr3_gencode::INA::ENSG00000148798.5	utr3	4	1	COAD	0.525	0.524704	0.837803
utr5_gencode::GDF5::ENSG00000125965.4	utr5	4	1	COAD	0.525	0.524704	0.837803
utr3_gencode::FYB::ENSG00000082074.11	utr3	4	1	SKCM	0.527	0.52661	0.837803
prom_gencode::SCYL2::ENSG00000136021.13	prom	5	1	SKCM	0.532	0.531601	0.837803
utr5_gencode::SIRPD::ENSG00000125900.8	utr5	5	1	SKCM	0.538	0.5378	0.837803
prom_gencode::ATP10D::ENSG00000145246.9	prom	9	2	COAD;UCEC	0.509;0.418	0.541876	0.837803
utr5_gencode::MALSU1::ENSG00000156928.4	utr5	4	1	SKCM	0.548	0.547817	0.837803
prom_gencode::AC040160.1::ENSG00000237102.2	prom	6	1	SKCM	0.556	0.55563	0.837803
prom_gencode::TMEM208::ENSG00000168701.14	prom	6	1	SKCM	0.556	0.55563	0.837803
prom_gencode::BEST3::ENSG00000127325.14	prom	9	2	SKCM;UCEC	0.549;0.409	0.560281	0.837803
prom_gencode::KDM5A::ENSG00000073614.7	prom	6	1	SKCM	0.578	0.578166	0.839212
ss_gencode::TP53::ENSG00000141510.11	ss	5	1	BRCA	0.579	0.579058	0.839212
prom_gencode::OR7G3::ENSG00000170920.2	prom	5	1	BRCA	0.581	0.581124	0.839212
utr5_gencode::CACNG6::ENSG00000130433.3	utr5	6	1	SKCM	0.596	0.596035	0.839212
prom_gencode::SERPINB7::ENSG00000166396.8	prom	10	2	COAD;SKCM	0.807;0.313	0.600021	0.839212
utr3_gencode::CLEC6A::ENSG00000205846.3	utr3	4	1	SKCM	0.605	0.605366	0.839212
utr5_gencode::ZFP14::ENSG00000142065.9	utr5	4	1	SKCM	0.613	0.612928	0.839212
prom_gencode::C6orf100::ENSG00000204709.4	prom	6	1	UCEC	0.625	0.625021	0.839212
utr5_gencode::DHX16::ENSG00000204560.5	utr5	7	1	SKCM	0.635	0.635124	0.839212
utr5_gencode::SLC22A2::ENSG00000112499.8	utr5	11	2	COAD;SKCM	0.905;0.311	0.638521	0.839212
prom_gencode::AC008132.1::ENSG00000182824.6	prom	5	1	BRCA	0.64	0.640152	0.839212
utr3_gencode::ADAM28::ENSG00000042980.8	utr3	22	2	COAD;SKCM	0.364;0.779	0.640804	0.839212
utr3_gencode::TBC1D22A::ENSG00000054611.9	utr3	8	2	LUAD;THCA	0.461;0.618	0.642743	0.839212
prom_gencode::TYW1B::ENSG00000254184.3	prom	11	1	SKCM	0.647	0.647042	0.839212
utr5_gencode::DLGAP5::ENSG00000126787.8	utr5	5	1	SKCM	0.649	0.648611	0.839212
prom_gencode::TRAIP::ENSG00000183763.4	prom	6	1	SKCM	0.652	0.651706	0.839212
prom_gencode::DPPA4::ENSG00000121570.8	prom	8	2	LUSC;SKCM	0.645;0.456	0.654266	0.839212
utr3_gencode::C1QTNF7::ENSG00000163145.8	utr3	9	2	COAD;SKCM	0.388;0.761	0.655635	0.839212
prom_gencode::DEFB129::ENSG00000125903.4	prom	6	1	COAD	0.668	0.667706	0.841505
prom_gencode::MAP3K19::ENSG00000176601.7	prom	10	2	COAD;SKCM	0.557;0.549	0.667945	0.841505
prom_gencode::AL645608.2::ENSG00000269308.1	prom	15	2	BRCA;UCEC	0.798;0.415	0.69712	0.8714
ss_gencode::STK11::ENSG00000118046.10	ss	4	1	LUAD	0.71	0.710395	0.881111
prom_gencode::ARHGEF18::ENSG00000104880.13	prom	9	1	SKCM	0.737	0.737217	0.888444
utr3_gencode::H2AFV::ENSG00000105968.14	utr3	5	1	THCA	0.749	0.748788	0.888444
utr3_gencode::PAFAH1B2::ENSG00000168092.9	utr3	18	4	COAD;HNSC;KIRC;UCEC	0.404;0.415;0.653;0.732	0.75273	0.888444
utr5_gencode::GSTM5::ENSG00000134201.6	utr5	4	1	SKCM	0.766	0.765939	0.888444
prom_gencode::RPS27::ENSG00000177954.7	prom	4	1	SKCM	0.771	0.771156	0.888444
utr5_gencode::NDUFB9::ENSG00000147684.3	utr5	4	1	SKCM	0.781	0.780879	0.888444
prom_gencode::C6orf62::ENSG00000112308.8	prom	11	2	LUSC;SKCM	0.704;0.594	0.782789	0.888444
prom_gencode::EGR1::ENSG00000120738.7	prom	6	1	SKCM	0.783	0.783139	0.888444
prom_gencode::TMEM160::ENSG00000130748.6	prom	5	1	SKCM	0.792	0.791667	0.888444
prom_gencode::SNX16::ENSG00000104497.9	prom	5	1	SKCM	0.794	0.794436	0.888444
utr3_gencode::MYO5B::ENSG00000167306.14	utr3	25	5	BRCA;COAD;LUAD;LUSC;SKCM	0.834;0.546;0.260;0.582;0.655	0.798615	0.888444
prom_gencode::S100A7A::ENSG00000184330.7	prom	6	1	SKCM	0.802	0.802328	0.888444
prom_gencode::SCGB2A1::ENSG00000124939.4	prom	5	1	SKCM	0.804	0.804164	0.888444
utr3_gencode::C9orf170::ENSG00000204446.2	utr3	14	3	COAD;LUAD;LUSC	0.681;0.854;0.377	0.804873	0.888444
utr3_gencode::ZNF208::ENSG00000160321.10	utr3	27	4	COAD;LUAD;LUSC;SKCM	0.247;0.785;0.841;0.631	0.804941	0.888444
prom_gencode::HAPLN1::ENSG00000145681.6	prom	4	1	COAD	0.807	0.807232	0.888444
prom_gencode::RPL13A::ENSG00000142541.12	prom	15	1	SKCM	0.811	0.811335	0.888444
prom_gencode::SMUG1::ENSG00000123415.10	prom	11	1	SKCM	0.816	0.816258	0.888444
prom_gencode::RP11-481A20.11::ENSG00000255098.1	prom	4	1	BRCA	0.826	0.825813	0.892771
utr5_gencode::NR1I2::ENSG00000144852.12	utr5	4	1	LUSC	0.838	0.8377	0.898659
prom_gencode::HLA-DRB5::ENSG00000198502.5	prom	8	2	BRCA;LUAD	0.783;0.631	0.842493	0.898659
prom_gencode::FEM1A::ENSG00000141965.3	prom	6	1	SKCM	0.858	0.858225	0.903288
prom_gencode::SESN2::ENSG00000130766.4	prom	6	1	SKCM	0.87	0.869663	0.903288
prom_gencode::MROH2A::ENSG00000185038.10	prom	5	1	SKCM	0.877	0.877067	0.903288
prom_gencode::PRAMEF4::ENSG00000243073.3	prom	4	1	COAD	0.88	0.880169	0.903288
utr3_gencode::E2F8::ENSG00000129173.8	utr3	4	1	COAD	0.88	0.880169	0.903288
utr3_gencode::CDH12::ENSG00000154162.9	utr3	4	1	COAD	0.886	0.885505	0.903288
prom_gencode::AP3D1::ENSG00000065000.11	prom	9	1	SKCM	0.896	0.895769	0.903288
utr5_gencode::PRKAG1::ENSG00000181929.7	utr5	5	1	SKCM	0.897	0.896728	0.903288
prom_gencode::ADRB3::ENSG00000188778.3	prom	4	1	KIRC	0.898	0.897643	0.903288
prom_gencode::EPS8L1::ENSG00000131037.10	prom	10	2	COAD;KICH	0.934;0.864	0.979993	0.979993

## Sheet: cds_TCGA505_survival_results
candidate	element_type	n_total_mutations_combined	n_types_combined	types_combined	combined_pvals	fishers_pval	qval
cds_gencode::ADAM7::ENSG00000069206.11	cds	17	3	COAD;LUSC;SKCM	0.52470;0.00029;0.76602	0.00595283	0.284244
cds_gencode::OR2A5::ENSG00000221836.2	cds	6	1	SKCM	0.0111	0.0110751	0.284244
cds_gencode::TP53::ENSG00000141510.11	cds	146	10	BLCA;BRCA;COAD;GBM;HNSC;LGG;LUAD;LUSC;SKCM;UCEC	0.1256;0.7995;0.5472;0.9775;9.91e-05;0.3718;0.3179;0.3912;0.7028;0.0507	0.0113697	0.284244
cds_gencode::HLA-DRB1::ENSG00000196126.6	cds	4	1	BRCA	0.0167	0.0167213	0.313525
cds_gencode::OR2L3::ENSG00000198128.3	cds	4	1	SKCM	0.0286	0.0285704	0.428556
cds_gencode::AKT1::ENSG00000142208.11	cds	4	1	BRCA	0.0358	0.0358308	0.447884
cds_gencode::KRAS::ENSG00000133703.7	cds	28	3	COAD;LUAD;UCEC	0.42393;0.00679;0.70498	0.0536236	0.505823
cds_gencode::MUC4::ENSG00000145113.17	cds	135	13	BLCA;BRCA;COAD;GBM;HNSC;KIRC;LGG;LUAD;LUSC;PRAD;SKCM;THCA;UCEC	0.23874;0.63888;0.03662;0.77628;0.43013;0.00338;0.56514;0.49706;0.02652;0.50000;0.43466;0.61849;0.67800	0.0539545	0.505823
cds_gencode::APC::ENSG00000134982.12	cds	19	2	COAD;LUSC	0.9545;0.0133	0.0680475	0.527969
cds_gencode::POM121L12::ENSG00000221900.4	cds	9	1	SKCM	0.0872	0.0872254	0.527969
cds_gencode::MARCH10::ENSG00000173838.7	cds	14	2	COAD;SKCM	0.6570;0.0265	0.0880409	0.527969
cds_gencode::PRAMEF2::ENSG00000120952.4	cds	9	2	LUSC;SKCM	0.0401;0.4491	0.0903788	0.527969
cds_gencode::DSPP::ENSG00000152591.8	cds	20	4	COAD;LUSC;SKCM;UCEC	0.4806;0.1418;0.0186;0.8588	0.0915147	0.527969
cds_gencode::FRG2B::ENSG00000225899.3	cds	4	1	BRCA	0.124	0.12413	0.595799
cds_gencode::MARCO::ENSG00000019169.9	cds	9	1	SKCM	0.125	0.125266	0.595799
cds_gencode::NRAS::ENSG00000213281.4	cds	8	1	SKCM	0.138	0.1378	0.595799
cds_gencode::NFE2L2::ENSG00000116044.11	cds	14	1	LUSC	0.148	0.147868	0.595799
cds_gencode::DCD::ENSG00000161634.7	cds	5	1	SKCM	0.156	0.155795	0.595799
cds_gencode::ZNF679::ENSG00000197123.5	cds	10	2	LUAD;SKCM	0.0682;0.5353	0.157321	0.595799
cds_gencode::C12orf50::ENSG00000165805.5	cds	6	1	SKCM	0.161	0.160938	0.595799
cds_gencode::OR5D18::ENSG00000186119.6	cds	7	1	LUSC	0.172	0.172283	0.595799
cds_gencode::OR8H2::ENSG00000181767.1	cds	12	2	LUSC;SKCM	0.8390;0.0514	0.178708	0.595799
cds_gencode::OR4A15::ENSG00000181958.3	cds	8	1	LUSC	0.196	0.195702	0.595799
cds_gencode::IL36B::ENSG00000136696.6	cds	7	1	SKCM	0.196	0.196202	0.595799
cds_gencode::SERPINB3::ENSG00000057149.10	cds	13	2	COAD;SKCM	0.5247;0.0984	0.204667	0.595799
cds_gencode::PLIN4::ENSG00000167676.3	cds	25	4	BRCA;LUSC;SKCM;UCEC	0.3544;0.6872;0.3058;0.0605	0.212987	0.595799
cds_gencode::ZNF831::ENSG00000124203.5	cds	29	4	COAD;LUAD;LUSC;SKCM	0.178;0.546;0.116;0.445	0.226237	0.595799
cds_gencode::FAM135B::ENSG00000147724.7	cds	39	5	COAD;LUAD;LUSC;SKCM;UCEC	0.4526;0.4635;0.0525;0.1627;0.8637	0.226857	0.595799
cds_gencode::PLG::ENSG00000122194.14	cds	15	3	COAD;SKCM;UCEC	0.480;0.162;0.242	0.242557	0.595799
cds_gencode::C12orf36::ENSG00000180861.5	cds	4	1	SKCM	0.248	0.248486	0.595799
cds_gencode::BRAF::ENSG00000157764.8	cds	25	2	SKCM;THCA	0.8020;0.0854	0.252028	0.595799
cds_gencode::AMPD1::ENSG00000116748.15	cds	8	2	COAD;SKCM	0.178;0.388	0.254208	0.595799
cds_gencode::SPHKAP::ENSG00000153820.8	cds	23	2	LUSC;SKCM	0.145;0.590	0.295956	0.672628
cds_gencode::CDKN2A::ENSG00000147889.12	cds	8	2	LUSC;SKCM	0.144;0.666	0.321329	0.708813
cds_gencode::TCHHL1::ENSG00000182898.3	cds	8	1	SKCM	0.337	0.337108	0.722374
cds_gencode::KRTAP4-5::ENSG00000198271.3	cds	6	1	COAD	0.374	0.37387	0.765396
cds_gencode::AC093323.1::ENSG00000268791.1	cds	8	2	COAD;UCEC	0.504;0.258	0.395576	0.765396
cds_gencode::FBXW7::ENSG00000109670.9	cds	14	2	COAD;UCEC	0.223;0.620	0.411623	0.765396
cds_gencode::PRSS3::ENSG00000010438.12	cds	19	3	BRCA;GBM;SKCM	0.7609;0.0799;0.7797	0.412253	0.765396
cds_gencode::AL390778.1::ENSG00000269408.1	cds	14	3	LUAD;LUSC;THCA	0.188;0.348;0.749	0.420257	0.765396
cds_gencode::NLRP4::ENSG00000160505.11	cds	21	3	COAD;LUAD;SKCM	0.781;0.123;0.543	0.433431	0.765396
cds_gencode::C7::ENSG00000112936.14	cds	9	1	SKCM	0.441	0.440509	0.765396
cds_gencode::EYA4::ENSG00000112319.13	cds	10	2	LUSC;SKCM	0.611;0.258	0.448552	0.765396
cds_gencode::IL7R::ENSG00000168685.10	cds	8	1	SKCM	0.455	0.45543	0.765396
cds_gencode::OR5F1::ENSG00000149133.1	cds	9	2	LUSC;SKCM	0.516;0.317	0.459238	0.765396
cds_gencode::OR1F1::ENSG00000168124.2	cds	5	1	SKCM	0.483	0.482877	0.7873
cds_gencode::PTEN::ENSG00000171862.5	cds	14	1	UCEC	0.515	0.514795	0.805253
cds_gencode::NLRP9::ENSG00000185792.5	cds	10	1	SKCM	0.543	0.542733	0.805253
cds_gencode::C17orf77::ENSG00000182352.4	cds	4	1	SKCM	0.547	0.547015	0.805253
cds_gencode::CR2::ENSG00000117322.12	cds	8	1	SKCM	0.549	0.549423	0.805253
cds_gencode::PABPC3::ENSG00000151846.7	cds	4	1	UCEC	0.558	0.558048	0.805253
cds_gencode::SLC38A1::ENSG00000111371.11	cds	8	2	COAD;SKCM	0.546;0.409	0.558308	0.805253
cds_gencode::OR4X2::ENSG00000172208.3	cds	4	1	SKCM	0.584	0.584254	0.815736
cds_gencode::PIK3CA::ENSG00000121879.3	cds	68	5	BRCA;COAD;HNSC;LUSC;UCEC	0.150;0.512;0.781;0.565;0.437	0.58733	0.815736
cds_gencode::ZNF208::ENSG00000160321.10	cds	21	3	COAD;LUSC;SKCM	0.525;0.395;0.540	0.625612	0.840189
cds_gencode::IGFN1::ENSG00000163395.12	cds	41	5	COAD;HNSC;LUAD;SKCM;UCEC	0.386;0.811;0.637;0.513;0.178	0.627341	0.840189
cds_gencode::BRINP3::ENSG00000162670.8	cds	18	3	COAD;LUAD;SKCM	0.681;0.277;0.740	0.684906	0.889343
cds_gencode::MEI4::ENSG00000269964.2	cds	12	2	LUSC;SKCM	0.794;0.415	0.694735	0.889343
cds_gencode::TGM4::ENSG00000163810.7	cds	8	2	COAD;SKCM	0.862;0.387	0.699617	0.889343
cds_gencode::PRAMEF1::ENSG00000116721.9	cds	6	1	SKCM	0.778	0.777527	0.942141
cds_gencode::DSG3::ENSG00000134757.4	cds	13	1	SKCM	0.795	0.79486	0.942141
cds_gencode::ARMC4::ENSG00000169126.11	cds	16	2	COAD;SKCM	0.515;0.882	0.812706	0.942141
cds_gencode::CTNNB1::ENSG00000168036.12	cds	11	2	COAD;UCEC	0.557;0.823	0.816294	0.942141
cds_gencode::ZNF99::ENSG00000213973.4	cds	36	6	BLCA;COAD;LUAD;LUSC;SKCM;UCEC	0.765;0.146;0.622;0.792;0.517;0.854	0.827279	0.942141
cds_gencode::GOLGA6L2::ENSG00000174450.7	cds	41	6	BRCA;COAD;LUAD;LUSC;SKCM;UCEC	0.894;0.553;0.698;0.337;0.704;0.299	0.828719	0.942141
cds_gencode::MUC21::ENSG00000204544.5	cds	4	1	BRCA	0.841	0.840847	0.942141
cds_gencode::BCLAF1::ENSG00000029363.11	cds	19	4	BRCA;COAD;LUSC;SKCM	0.661;0.897;0.251;0.837	0.841646	0.942141
cds_gencode::KRTAP5-8::ENSG00000241233.1	cds	4	1	KICH	0.864	0.864077	0.953026
cds_gencode::SPRR3::ENSG00000163209.10	cds	4	1	COAD	0.897	0.897029	0.956953
cds_gencode::FCN2::ENSG00000160339.11	cds	6	1	SKCM	0.902	0.901956	0.956953
cds_gencode::MUC17::ENSG00000169876.9	cds	48	6	BRCA;COAD;LUAD;LUSC;SKCM;UCEC	0.676;0.690;0.844;0.740;0.514;0.302	0.905915	0.956953
cds_gencode::CDH10::ENSG00000040731.6	cds	30	5	COAD;LUAD;LUSC;SKCM;UCEC	0.657;0.667;0.589;0.545;0.950	0.946174	0.973187
cds_gencode::KRT4::ENSG00000170477.8	cds	13	3	COAD;KICH;SKCM	0.724;0.864;0.718	0.952677	0.973187
cds_gencode::KRTAP9-1::ENSG00000240542.2	cds	12	2	COAD;KICH	0.847;0.864	0.960211	0.973187
cds_gencode::IDH1::ENSG00000138413.9	cds	19	2	LGG;SKCM	0.983;0.910	0.994258	0.994258

## Sheet: TCGAexome_data_overview
cancer_type	all	mapped	with_survival_data	median_follow_up	mean_follow_up	alive
ACC	91	91	91	1171	1434	34
BLCA	221	221	219	481	674	93
BRCA	453	453	453	1001	1391	73
CESC	198	198	198	709	1102	42
CHOL	36	36	36	552	634	18
ESCA	183	183	183	393	538	75
HNSC	486	486	484	645	910	208
KICH	51	51	50	2098	2066	6
KIRC	197	197	197	1165	1258	45
KIRP	169	169	168	668	966	25
LGG	447	446	445	648	959	111
LIHC	202	202	202	580	741	89
LUAD	497	445	438	628	863	149
PAAD	147	147	147	466	573	81
PCPG	179	179	179	755	1063	6
PRAD	405	405	405	937	1114	9
SKCM	332	331	325	1195	1852	155
STAD	429	395	389	419	556	138
THCA	390	386	386	986	1287	12
UCEC	204	204	204	1059	1232	18
UCS	57	57	57	611	888	35
UVM	80	80	80	595	607	14

## Sheet: nc_TCGAexome_survival_results
candidate	element_type	n_total_mutations_combined	n_types_combined	types_combined	combined_pvals	fishers_pval	qval
utr5_gencode::CD1A::ENSG00000158477.6	utr5	4	1	SKCM	1.16e-09	1.16164e-09	5.34355e-08
utr3_gencode::SEC14L1::ENSG00000129657.10	utr3	25	4	HNSC;PAAD;SKCM;STAD	5.82e-05;0.248;0.830;0.941	0.00365457	0.0840552
ss_gencode::TP53::ENSG00000141510.11	ss	98	10	BRCA;ESCA;HNSC;KICH;LGG;LIHC;LUAD;PRAD;STAD;UCS	0.31461;0.80134;0.15301;0.00021;0.57559;0.06179;0.13100;0.59877;0.16691;0.89788	0.00664892	0.10195
prom_gencode::PRSS3::ENSG00000010438.12	prom	378	4	BRCA;HNSC;THCA;UCEC	0.68735;0.00182;0.19890;0.99846	0.0346085	0.282069
utr3_gencode::ADAM28::ENSG00000042980.8	utr3	48	2	KICH;UCEC	0.00662;0.91760	0.037065	0.282069
utr3_gencode::SERPINB3::ENSG00000057149.10	utr3	5	1	LUAD	0.0416	0.0416147	0.282069
utr5_gencode::TBC1D12::ENSG00000108239.8	utr5	43	2	BLCA;THCA	0.72856;0.00994	0.0429236	0.282069
ss_gencode::STK11::ENSG00000118046.10	ss	9	1	LUAD	0.0647	0.0647089	0.372076
utr3_gencode::PSG1::ENSG00000231924.5	utr3	43	4	ESCA;LIHC;SKCM;STAD	0.58614;0.00344;0.91351;0.93212	0.121353	0.605188
ss_gencode::NF1::ENSG00000196712.12	ss	18	3	LGG;LUAD;SKCM	0.0479;0.7119;0.2414	0.142537	0.605188
utr5_gencode::WDR74::ENSG00000133316.11	utr5	4	1	SKCM	0.145	0.144719	0.605188
utr5_gencode::CRP::ENSG00000132693.8	utr5	4	1	SKCM	0.194	0.193954	0.715337
ss_gencode::CDKN2A::ENSG00000147889.12	ss	14	2	HNSC;SKCM	0.124;0.494	0.232023	0.715337
utr3_gencode::MUC19::ENSG00000205592.9	utr3	18	2	ESCA;LIHC	0.107;0.631	0.248592	0.715337
prom_gencode::CCDC66::ENSG00000180376.12	prom	22	1	UCEC	0.251	0.251351	0.715337
utr3_gencode::PRSS3::ENSG00000010438.12	utr3	628	6	BRCA;HNSC;KICH;SKCM;THCA;UCEC	0.5726;0.3111;0.2454;0.0829;0.1737;0.9903	0.254776	0.715337
utr3_gencode::FAHD2B::ENSG00000144199.7	utr3	51	1	UCEC	0.264	0.264364	0.715337
utr3_gencode::C10orf53::ENSG00000178645.8	utr3	11	1	SKCM	0.318	0.317632	0.789939
ss_gencode::PTEN::ENSG00000171862.5	ss	7	1	UCEC	0.326	0.326279	0.789939
utr3_gencode::MYO5B::ENSG00000167306.14	utr3	9	1	ESCA	0.371	0.370892	0.803214
utr3_gencode::TRIM55::ENSG00000147573.12	utr3	4	1	SKCM	0.398	0.398286	0.803214
utr3_gencode::PSG6::ENSG00000170848.11	utr3	7	1	SKCM	0.4	0.399867	0.803214
prom_gencode::HLA-DRB1::ENSG00000196126.6	prom	130	4	BRCA;HNSC;THCA;UCEC	0.708;0.217;0.264;0.430	0.423703	0.803214
utr5_gencode::CACNG6::ENSG00000130433.3	utr5	6	1	SKCM	0.443	0.443185	0.803214
utr3_gencode::SLC9B1::ENSG00000164037.12	utr3	14	2	HNSC;UCEC	0.489;0.326	0.452148	0.803214
prom_gencode::HLA-DRB5::ENSG00000198502.5	prom	146	3	HNSC;THCA;UCEC	0.196;0.291;0.996	0.453991	0.803214
utr3_gencode::RERG::ENSG00000134533.2	utr3	5	1	SKCM	0.527	0.526942	0.89645
utr5_gencode::TBC1D29::ENSG00000266733.1	utr5	647	5	ESCA;HNSC;SKCM;THCA;UCEC	0.443;0.203;0.977;0.227;0.610	0.549647	0.89645
ss_gencode::SKA3::ENSG00000165480.11	ss	14	2	THCA;UCEC	0.557;0.467	0.610243	0.89645
utr5_gencode::PRKAG1::ENSG00000181929.7	utr5	12	1	SKCM	0.615	0.614782	0.89645
prom_gencode::MUC3A::ENSG00000169894.13	prom	14	3	BLCA;HNSC;SKCM	0.774;0.203;0.690	0.616584	0.89645
utr3_gencode::CYP1A2::ENSG00000140505.6	utr3	4	1	SKCM	0.654	0.654446	0.89645
utr3_gencode::C1QTNF7::ENSG00000163145.8	utr3	4	1	SKCM	0.67	0.669791	0.89645
utr3_gencode::CDH12::ENSG00000154162.9	utr3	27	4	HNSC;LGG;LUAD;PAAD	0.875;0.356;0.400;0.553	0.719263	0.89645
prom_gencode::EPS8L1::ENSG00000131037.10	prom	6	1	UCEC	0.748	0.747875	0.89645
utr3_gencode::AC009892.10::ENSG00000224730.1	utr3	5	1	SKCM	0.749	0.74906	0.89645
prom_gencode::ZNF324::ENSG00000083812.7	prom	10	2	HNSC;UCEC	0.526;0.756	0.764538	0.89645
utr5_gencode::NDUFB9::ENSG00000147684.3	utr5	21	1	SKCM	0.772	0.772313	0.89645
prom_gencode::C16orf91::ENSG00000174109.3	prom	83	4	BRCA;HNSC;THCA;UCEC	0.746;0.182;0.672;0.968	0.772366	0.89645
prom_gencode::RESP18::ENSG00000182698.7	prom	6	1	UCEC	0.78	0.779522	0.89645
ss_gencode::PBRM1::ENSG00000163939.14	ss	4	1	KIRC	0.815	0.815216	0.914633
utr5_gencode::ERGIC3::ENSG00000125991.14	utr5	7	1	SKCM	0.838	0.8375	0.916531
utr5_gencode::CGB5::ENSG00000189052.6	utr5	5	1	SKCM	0.857	0.856757	0.916531
utr3_gencode::ELOVL3::ENSG00000119915.4	utr3	4	1	SKCM	0.928	0.928108	0.970295
utr3_gencode::H2AFV::ENSG00000105968.14	utr3	150	15	BLCA;CESC;ESCA;HNSC;KIRC;KIRP;LGG;LIHC;LUAD;PAAD;PRAD;SKCM;STAD;THCA;UCEC	0.820;0.762;0.771;0.414;0.518;0.883;0.938;0.280;0.207;0.911;0.647;0.179;0.848;0.700;0.721	0.97482	0.989605
utr5_gencode::GSTM5::ENSG00000134201.6	utr5	12	2	SKCM;STAD	0.907;0.947	0.989605	0.989605

## Sheet: cds_TCGAexome_survival_results
candidate	element_type	n_total_mutations_combined	n_types_combined	types_combined	combined_pvals	fishers_pval	qval
cds_gencode::SPHKAP::ENSG00000153820.8	cds	279	14	BLCA;BRCA;CESC;ESCA;HNSC;KIRC;LIHC;LUAD;PAAD;PCPG;PRAD;SKCM;STAD;UCEC	0.745;0.700;0.482;0.664;0.350;0.265;0.652;0.715;0.198;3e-09;0.637;0.539;0.530;0.281	0.000668131	0.0581274
cds_gencode::NLRP9::ENSG00000185792.5	cds	135	9	BLCA;BRCA;CESC;HNSC;LIHC;LUAD;SKCM;STAD;UCEC	0.731;2.47e-07;0.905;0.679;0.471;0.183;0.804;0.880;0.458	0.00269	0.11473
cds_gencode::APC::ENSG00000134982.12	cds	209	10	BLCA;CESC;ESCA;HNSC;LIHC;LUAD;PRAD;SKCM;STAD;UCEC	0.237360;0.559544;0.205765;0.484422;0.087103;0.330250;0.000132;0.528149;0.053576;0.972012	0.0039562	0.11473
cds_gencode::NFE2L2::ENSG00000116044.11	cds	113	9	BLCA;CESC;ESCA;HNSC;KIRC;KIRP;LUAD;SKCM;UCEC	0.158003;0.567210;0.491592;0.070494;0.000208;0.850516;0.163459;0.521426;0.558600	0.00969129	0.210786
cds_gencode::PTEN::ENSG00000171862.5	cds	109	12	BLCA;CESC;ESCA;HNSC;KIRC;LGG;LIHC;LUAD;SKCM;STAD;UCEC;UCS	0.908420;0.037911;0.876904;0.825003;0.634365;0.000144;0.316409;0.106885;0.721320;0.142303;0.795305;0.228803	0.0179003	0.311465
cds_gencode::FRG2B::ENSG00000225899.3	cds	42	4	HNSC;LUAD;SKCM;STAD	0.1962;0.1233;0.0221;0.6793	0.0447686	0.594094
cds_gencode::TP53::ENSG00000141510.11	cds	826	16	ACC;BLCA;BRCA;CESC;ESCA;HNSC;KICH;LGG;LIHC;LUAD;PAAD;PRAD;SKCM;STAD;UCEC;UCS	0.01705;0.42884;0.64791;0.55568;0.62125;0.07093;0.53202;0.80211;0.11264;0.00729;0.09630;0.11296;0.74374;0.97546;0.48040;0.64257	0.0512729	0.594094
cds_gencode::KRAS::ENSG00000133703.7	cds	17	3	PAAD;SKCM;UCEC	0.41229;0.73687;0.00685	0.0546293	0.594094
cds_gencode::MUC4::ENSG00000145113.17	cds	645	19	ACC;BLCA;BRCA;CESC;ESCA;HNSC;KICH;KIRC;KIRP;LGG;LIHC;LUAD;PAAD;PRAD;SKCM;STAD;THCA;UCEC;UCS	0.06115;0.61047;0.57144;0.58902;0.15170;0.65163;0.21410;0.44186;0.25893;0.29206;0.36944;0.19152;0.64891;0.64927;0.73612;0.81394;0.00061;0.13544;0.43088	0.0670253	0.615368
cds_gencode::NDUFV2::ENSG00000178127.8	cds	9	1	SKCM	0.0707	0.0707319	0.615368
cds_gencode::KRTAP4-5::ENSG00000198271.3	cds	37	6	HNSC;LUAD;PAAD;SKCM;STAD;THCA	0.3935;0.2946;0.1472;0.0737;0.0854;0.6515	0.0853602	0.675121
cds_gencode::MUC17::ENSG00000169876.9	cds	781	17	BLCA;CESC;ESCA;HNSC;KIRC;KIRP;LGG;LIHC;LUAD;PAAD;PCPG;PRAD;SKCM;STAD;THCA;UCEC;UCS	0.80904;0.56493;0.58240;0.59315;0.00786;0.12987;0.43041;0.23130;0.41971;0.40098;0.00086;0.19760;0.87593;0.86119;0.89510;0.67066;0.78430	0.0970118	0.703336
cds_gencode::DSG3::ENSG00000134757.4	cds	145	8	BLCA;CESC;HNSC;LIHC;LUAD;SKCM;STAD;UCEC	0.4817;0.7851;0.8794;0.7386;0.0040;0.5215;0.0279;0.8736	0.12528	0.838415
cds_gencode::KRTAP9-1::ENSG00000240542.2	cds	8	1	THCA	0.161	0.161496	0.998572
cds_gencode::GOLGA6L2::ENSG00000174450.7	cds	163	6	BRCA;CESC;ESCA;LIHC;STAD;UCEC	0.5770;0.0812;0.3775;0.2553;0.0887;0.9281	0.200791	0.998572
cds_gencode::OR8H2::ENSG00000181767.1	cds	85	8	BLCA;HNSC;LIHC;LUAD;PAAD;SKCM;STAD;UCEC	0.32480;0.21561;0.88810;0.26617;0.00565;0.86656;0.79110;0.71467	0.221004	0.998572
cds_gencode::KRT4::ENSG00000170477.8	cds	85	7	HNSC;KIRC;LUAD;SKCM;STAD;THCA;UCEC	0.215;0.102;0.900;0.521;0.315;0.279;0.162	0.222443	0.998572
cds_gencode::OR5F1::ENSG00000149133.1	cds	79	6	BLCA;HNSC;LUAD;SKCM;STAD;UCEC	0.7917;0.1760;0.4512;0.9123;0.0101;0.8701	0.231798	0.998572
cds_gencode::ZNF208::ENSG00000160321.10	cds	342	16	BLCA;BRCA;CESC;ESCA;HNSC;KICH;KIRC;LGG;LIHC;LUAD;PAAD;PRAD;SKCM;STAD;THCA;UCEC	0.63689;0.27372;0.54604;0.00424;0.83332;0.49323;0.27537;0.01825;0.29119;0.88823;0.19966;0.67288;0.95316;0.43613;0.70958;0.84885	0.232057	0.998572
cds_gencode::PRSS3::ENSG00000010438.12	cds	822	6	HNSC;KICH;LIHC;SKCM;THCA;UCEC	0.0119;0.3350;0.6577;0.8102;0.9079;0.3232	0.254308	0.998572
cds_gencode::TPRXL::ENSG00000180438.10	cds	4	1	ESCA	0.264	0.264263	0.998572
cds_gencode::HLA-DRB1::ENSG00000196126.6	cds	8	1	SKCM	0.279	0.279255	0.998572
cds_gencode::FCN2::ENSG00000160339.11	cds	40	4	BLCA;LUAD;SKCM;STAD	0.4527;0.0451;0.6806;0.5382	0.279975	0.998572
cds_gencode::C7::ENSG00000112936.14	cds	165	11	CESC;ESCA;HNSC;LGG;LIHC;LUAD;PAAD;SKCM;STAD;THCA;UCEC	0.2233;0.1362;0.5215;0.8875;0.2937;0.3574;0.2037;0.2703;0.0624;0.6961;0.8805	0.280182	0.998572
cds_gencode::OR2A5::ENSG00000221836.2	cds	54	5	LGG;LUAD;SKCM;STAD;UCEC	0.0513;0.6978;0.3166;0.3307;0.7658	0.305237	0.998572
cds_gencode::PLIN4::ENSG00000167676.3	cds	798	13	BLCA;CESC;ESCA;HNSC;KICH;KIRP;LIHC;LUAD;PAAD;SKCM;STAD;THCA;UCEC	0.8807;0.6540;0.3021;0.0810;0.1179;0.4409;0.8436;0.4727;0.0271;0.9884;0.7989;0.1946;0.4293	0.314433	0.998572
cds_gencode::IL10::ENSG00000136634.5	cds	7	1	SKCM	0.336	0.335773	0.998572
cds_gencode::TBP::ENSG00000112592.8	cds	101	9	ESCA;HNSC;LGG;LUAD;PAAD;PRAD;SKCM;STAD;UCEC	0.3683;0.8082;0.3218;0.7696;0.5863;0.2492;0.7535;0.2742;0.0234	0.348283	0.998572
cds_gencode::C12orf50::ENSG00000165805.5	cds	72	6	BLCA;HNSC;LUAD;SKCM;STAD;UCEC	0.217;0.767;0.090;0.912;0.152;0.808	0.385021	0.998572
cds_gencode::MEI4::ENSG00000269964.2	cds	4	1	ESCA	0.392	0.391573	0.998572
cds_gencode::NRAS::ENSG00000213281.4	cds	7	1	SKCM	0.393	0.393429	0.998572
cds_gencode::GKN2::ENSG00000183607.5	cds	10	2	SKCM;UCEC	0.171;0.764	0.395928	0.998572
cds_gencode::ZNF99::ENSG00000213973.4	cds	251	14	BLCA;CESC;ESCA;HNSC;KIRP;LGG;LIHC;LUAD;PAAD;PRAD;SKCM;STAD;THCA;UCEC	0.406;0.133;0.222;0.574;0.582;0.666;0.705;0.496;0.021;0.615;0.142;0.766;0.640;0.886	0.453272	0.998572
cds_gencode::TAS2R43::ENSG00000255374.1	cds	458	6	HNSC;KICH;SKCM;STAD;THCA;UCEC	0.045;0.857;0.708;0.804;0.298;0.468	0.479924	0.998572
cds_gencode::OR4A15::ENSG00000181958.3	cds	116	8	BLCA;ESCA;HNSC;LIHC;LUAD;SKCM;STAD;UCEC	0.24171;0.00303;0.96844;0.75933;0.91872;0.93872;0.97957;0.89415	0.480402	0.998572
cds_gencode::BCLAF1::ENSG00000029363.11	cds	237	12	BLCA;CESC;ESCA;HNSC;LGG;LIHC;LUAD;PAAD;SKCM;STAD;THCA;UCEC	0.0923;0.2425;0.1787;0.7767;0.9178;0.8027;0.9937;0.1798;0.0692;0.4336;0.8370;0.7802	0.492233	0.998572
cds_gencode::NLRP4::ENSG00000160505.11	cds	192	14	BLCA;BRCA;CESC;ESCA;HNSC;KIRC;LGG;LIHC;LUAD;PRAD;SKCM;STAD;THCA;UCEC	0.852991;0.284042;0.869898;0.441274;0.782676;0.000158;0.966394;0.756147;0.753939;0.602919;0.793576;0.605413;0.703743;0.876941	0.497473	0.998572
cds_gencode::AKT1::ENSG00000142208.11	cds	34	4	HNSC;SKCM;STAD;UCEC	0.0606;0.7207;0.7736;0.7464	0.498437	0.998572
cds_gencode::PSG2::ENSG00000242221.4	cds	63	5	BLCA;HNSC;LUAD;SKCM;STAD	0.0187;0.8406;0.9809;0.7136;0.9103	0.512276	0.998572
cds_gencode::ARMC4::ENSG00000169126.11	cds	153	10	BLCA;CESC;ESCA;HNSC;KIRC;LIHC;LUAD;SKCM;STAD;UCEC	0.0759;0.9166;0.1433;0.2466;0.6232;0.2090;0.6834;0.4946;0.9149;0.8642	0.539286	0.998572
cds_gencode::TPSD1::ENSG00000095917.9	cds	104	8	BRCA;KICH;LUAD;PAAD;SKCM;STAD;THCA;UCEC	0.3763;0.9226;0.8567;0.7229;0.0557;0.3938;0.1679;0.9618	0.571917	0.998572
cds_gencode::ZNF679::ENSG00000197123.5	cds	93	7	ESCA;HNSC;KIRP;LUAD;SKCM;STAD;UCEC	0.3288;0.6816;0.5655;0.8871;0.8366;0.0323;0.7101	0.584199	0.998572
cds_gencode::IGFN1::ENSG00000163395.12	cds	301	10	BLCA;BRCA;CESC;ESCA;HNSC;LIHC;LUAD;SKCM;STAD;UCEC	0.832;0.656;0.144;0.321;0.429;0.372;0.283;0.831;0.850;0.155	0.588424	0.998572
cds_gencode::IL36B::ENSG00000136696.6	cds	46	5	BLCA;HNSC;LUAD;SKCM;UCEC	0.154;0.662;0.550;0.398;0.746	0.609816	0.998572
cds_gencode::BRINP3::ENSG00000162670.8	cds	250	12	BLCA;CESC;ESCA;HNSC;KIRC;LIHC;LUAD;PAAD;PRAD;SKCM;STAD;UCEC	0.4518;0.8643;0.8210;0.6032;0.1255;0.8485;0.6401;0.6419;0.0189;0.5198;0.3110;0.8609	0.61377	0.998572
cds_gencode::MARCH10::ENSG00000173838.7	cds	64	5	CESC;LUAD;SKCM;STAD;UCEC	0.168;0.266;0.666;0.708;0.845	0.623072	0.998572
cds_gencode::PABPC3::ENSG00000151846.7	cds	563	12	BLCA;CESC;HNSC;KIRC;LGG;LUAD;PAAD;PRAD;SKCM;STAD;THCA;UCEC	0.48829;0.88263;0.00433;0.77328;0.85738;0.89560;0.26481;0.77127;0.96856;0.65902;0.21793;0.85861	0.636432	0.998572
cds_gencode::FBXW7::ENSG00000109670.9	cds	179	10	BLCA;CESC;ESCA;HNSC;LGG;LUAD;SKCM;STAD;UCEC;UCS	0.4847;0.6152;0.3212;0.3446;0.6764;0.0753;0.7244;0.9726;0.7105;0.2154	0.637997	0.998572
cds_gencode::FAM135B::ENSG00000147724.7	cds	351	12	BLCA;CESC;ESCA;HNSC;KIRP;LUAD;PAAD;PRAD;SKCM;STAD;UCEC;UCS	0.62982;0.90073;0.89307;0.46491;0.00747;0.39789;0.10631;0.64575;0.93730;0.90222;0.93657;0.74808	0.642676	0.998572
cds_gencode::OR4X2::ENSG00000172208.3	cds	47	5	BLCA;HNSC;LUAD;SKCM;UCEC	0.493;0.311;0.252;0.668;0.771	0.644918	0.998572
cds_gencode::AMPD1::ENSG00000116748.15	cds	86	6	BLCA;LIHC;LUAD;SKCM;STAD;UCEC	0.564;0.883;0.177;0.774;0.166;0.808	0.669793	0.998572
cds_gencode::PSG8::ENSG00000124467.14	cds	95	6	ESCA;HNSC;LUAD;SKCM;STAD;THCA	0.758;0.441;0.966;0.320;0.145;0.711	0.696008	0.998572
cds_gencode::MUC21::ENSG00000204544.5	cds	252	10	CESC;ESCA;HNSC;LGG;LIHC;LUAD;PAAD;SKCM;THCA;UCEC	0.252;0.840;0.506;0.951;0.102;0.630;0.466;0.956;0.118;0.951	0.713477	0.998572
cds_gencode::PLG::ENSG00000122194.14	cds	125	9	BLCA;CESC;ESCA;HNSC;LIHC;LUAD;SKCM;STAD;UCEC	0.564;0.655;0.572;0.339;0.275;0.275;0.306;0.765;0.752	0.735124	0.998572
cds_gencode::DCD::ENSG00000161634.7	cds	9	1	SKCM	0.746	0.745968	0.998572
cds_gencode::BRAF::ENSG00000157764.8	cds	73	7	BLCA;HNSC;LIHC;LUAD;SKCM;STAD;UCEC	0.148;0.933;0.209;0.839;0.626;0.535;0.785	0.754006	0.998572
cds_gencode::TCHHL1::ENSG00000182898.3	cds	123	9	BLCA;HNSC;KIRC;LIHC;LUAD;SKCM;STAD;THCA;UCEC	0.414;0.419;0.103;0.298;0.668;0.891;0.791;0.590;0.833	0.767605	0.998572
cds_gencode::OR2L3::ENSG00000198128.3	cds	81	6	BLCA;CESC;HNSC;LUAD;SKCM;STAD	0.434;0.589;0.194;0.480;0.741;0.928	0.767612	0.998572
cds_gencode::IDH1::ENSG00000138413.9	cds	23	4	HNSC;SKCM;STAD;UCEC	0.494;0.368;0.738;0.751	0.800321	0.998572
cds_gencode::CDKN2A::ENSG00000147889.12	cds	90	7	ESCA;HNSC;LUAD;PAAD;SKCM;STAD;UCEC	0.695;0.139;0.797;0.514;0.887;0.660;0.424	0.8149	0.998572
cds_gencode::POM121L12::ENSG00000221900.4	cds	170	10	BLCA;CESC;HNSC;LGG;LIHC;LUAD;PRAD;SKCM;STAD;UCEC	0.9203;0.2580;0.9544;0.6659;0.7140;0.7211;0.6115;0.8904;0.2339;0.0994	0.838051	0.998572
cds_gencode::PRAMEF1::ENSG00000116721.9	cds	85	8	CESC;ESCA;HNSC;LIHC;LUAD;PAAD;SKCM;STAD	0.414;0.918;0.503;0.814;0.704;0.427;0.986;0.124	0.849058	0.998572
cds_gencode::KRTAP5-8::ENSG00000241233.1	cds	43	5	KICH;PAAD;SKCM;STAD;UCEC	0.764;0.458;0.880;0.885;0.258	0.869572	0.998572
cds_gencode::PIK3CA::ENSG00000121879.3	cds	269	15	BLCA;BRCA;CESC;ESCA;HNSC;KIRC;LGG;LIHC;LUAD;PAAD;PRAD;SKCM;STAD;UCEC;UCS	0.383;0.817;0.056;0.645;0.460;0.907;0.414;0.751;0.330;0.523;0.604;0.280;0.932;0.950;0.581	0.873067	0.998572
cds_gencode::DEFB114::ENSG00000177684.3	cds	6	1	SKCM	0.884	0.884145	0.998572
cds_gencode::MARCO::ENSG00000019169.9	cds	116	6	ESCA;LUAD;SKCM;STAD;THCA;UCEC	0.504;0.355;0.906;0.720;0.669;0.480	0.884638	0.998572
cds_gencode::IL7R::ENSG00000168685.10	cds	101	6	BLCA;HNSC;LUAD;SKCM;STAD;UCEC	0.836;0.480;0.155;0.857;0.912;0.803	0.889641	0.998572
cds_gencode::CR2::ENSG00000117322.12	cds	143	10	BLCA;CESC;HNSC;LGG;LIHC;LUAD;PAAD;SKCM;STAD;UCEC	0.793;0.692;0.717;0.765;0.168;0.310;0.193;0.804;0.936;0.894	0.901963	0.998572
cds_gencode::B2M::ENSG00000166710.13	cds	21	3	HNSC;LUAD;STAD	0.778;0.552;0.873	0.923172	0.998572
cds_gencode::OR1F1::ENSG00000168124.2	cds	41	4	LUAD;SKCM;STAD;UCEC	0.449;0.618;0.960;0.773	0.92386	0.998572
cds_gencode::C12orf36::ENSG00000180861.5	cds	17	2	SKCM;UCEC	0.772;0.827	0.92499	0.998572
cds_gencode::PRAMEF2::ENSG00000120952.4	cds	87	8	CESC;ESCA;HNSC;LUAD;SKCM;STAD;THCA;UCEC	0.867;0.391;0.443;0.431;0.972;0.695;0.611;0.499	0.927689	0.998572
cds_gencode::GLP2R::ENSG00000065325.8	cds	74	6	HNSC;LIHC;LUAD;SKCM;STAD;UCEC	0.530;0.489;0.635;0.624;0.692;0.827	0.931744	0.998572
cds_gencode::TGM4::ENSG00000163810.7	cds	68	6	BLCA;HNSC;LUAD;SKCM;STAD;UCEC	0.353;0.594;0.763;0.858;0.573;0.746	0.931871	0.998572
cds_gencode::SPRR3::ENSG00000163209.10	cds	29	3	LUAD;SKCM;STAD	0.670;0.725;0.844	0.93866	0.998572
cds_gencode::SLC38A1::ENSG00000111371.11	cds	63	6	CESC;HNSC;LIHC;SKCM;STAD;UCEC	0.750;0.654;0.484;0.571;0.594;0.794	0.93899	0.998572
cds_gencode::CIB3::ENSG00000141977.5	cds	18	2	LUAD;SKCM	0.689;0.979	0.939999	0.998572
cds_gencode::CTNNB1::ENSG00000168036.12	cds	82	9	BLCA;ESCA;HNSC;LIHC;LUAD;PAAD;SKCM;STAD;UCEC	0.383;0.433;0.698;0.673;0.446;0.531;0.529;0.938;0.846	0.940587	0.998572
cds_gencode::DSPP::ENSG00000152591.8	cds	243	11	BLCA;BRCA;CESC;ESCA;HNSC;KICH;LIHC;LUAD;SKCM;STAD;UCEC	0.868;0.709;0.333;0.522;0.603;0.957;0.471;0.596;0.657;0.965;0.175	0.946186	0.998572
cds_gencode::SERPINB3::ENSG00000057149.10	cds	73	5	BLCA;LIHC;LUAD;SKCM;STAD	0.621;0.860;0.293;0.937;0.916	0.946729	0.998572
cds_gencode::CDH10::ENSG00000040731.6	cds	245	8	BLCA;CESC;ESCA;HNSC;LUAD;SKCM;STAD;UCEC	0.766;0.439;0.972;0.225;0.915;0.614;0.626;0.917	0.962796	0.998572
cds_gencode::ADAM7::ENSG00000069206.11	cds	148	8	ESCA;HNSC;LGG;LIHC;LUAD;SKCM;STAD;UCEC	0.329;0.351;0.776;0.875;0.888;0.724;0.596;0.923	0.969827	0.998572
cds_gencode::ZNF831::ENSG00000124203.5	cds	296	12	BLCA;CESC;ESCA;HNSC;LGG;LIHC;LUAD;PAAD;PRAD;SKCM;STAD;UCEC	0.4040;0.8509;0.6051;0.7850;0.9459;0.0986;0.9144;0.5149;0.6499;0.5378;0.9377;0.7659	0.971682	0.998572
cds_gencode::EYA4::ENSG00000112319.13	cds	112	6	BLCA;HNSC;LUAD;SKCM;STAD;UCEC	0.591;0.737;0.440;0.965;0.704;0.883	0.976768	0.998572
cds_gencode::OR5D18::ENSG00000186119.6	cds	95	8	BLCA;HNSC;LGG;LIHC;LUAD;SKCM;STAD;UCEC	0.633;0.929;0.794;0.769;0.474;0.480;0.682;0.806	0.985714	0.998572
cds_gencode::C17orf77::ENSG00000182352.4	cds	23	3	HNSC;SKCM;STAD	0.923;0.839;0.961	0.99654	0.998572
cds_gencode::KCNJ15::ENSG00000157551.13	cds	46	5	HNSC;LIHC;SKCM;STAD;UCEC	0.946;0.917;0.816;0.800;0.792	0.998572	0.998572
