# Supplementary material for: Non-coding cancer driver candidates identified with a sample- and position-specific model of the somatic mutation rate
Source: eLife journal article supplement (doi:10.7554/elife.21778), 2017-03-31
Supplement: supp [file elife-21778-supp-v2.zip › elife_poa_e21778_Supplementary_File_7.xlsx]

## Sheet: legend
General description
Information on how to access TCGA expression and clinical data used in the analyses
Sheet number	Sheet name	Information
2	TCGAexome_expression_samples	Overview of the 4295 TCGA exome samples analysed wrt. expression data
3	TCGAexome_SNV_samples	Overview of the TCGA exome samples for which we obtain mutation calls
4	TCGA505_survival_samples	Overview of the TCGA whole genome samples we analyse wrt. clinical data
5	TCGAexome_survival_samples	Overview of the TCGA exome samples we analyse wrt. clinical data
Further information for sheet 2: TCGAexome_expression_samples
A total of 4,295 TCGA exome samples have both mutation calls and expression data available.
The expression data can be obtained using the R/Bioconductor-package “TCGAbiolinks” available at https://bioconductor.org/packages/release/bioc/html/TCGAbiolinks.html, with the function GDCquery() with the following options:
project: The cancer type, e.g. "TCGA-ACC"
data.category: "Gene expression",
data.type: "Gene expression quantification",
legacy: TRUE
barcode: The sample id, e.g. "TCGA-OR-A5JA-01A-11R-A29S-07"
platform: "Illumina HiSeq"
file.type: "normalized_results"
experimental.strategy: "RNA-Seq"
The full list of projects and barcodes are given in sheet 2
Further information for sheet 3: TCGAexome_SNV_samples
The TCGA exome mutation calls can be obtained using the R/Bioconductor-package “TCGAbiolinks” with the function GDCquery() with the following options:
project: The cancer type, e.g. “TCGA-ACC"
data.category: "Simple nucleotide variation"
data.type: "Simple somatic mutation"
access: "open"
legacy: TRUE
This will enable the user to download the complete *.maf file for the specified project. To get the relevant samples, the sample ids in sheet 3 should be subsetted.
Further information for sheet 4: TCGA505_survival_samples
We have analysed a total of 489 TCGA whole genomes with clinical data. The clinical data can be obtained using the R/Bioconductor-package “TCGAbiolinks” with the function GDCquery_clinic() with the following options:
project: The cancer type, e.g. “TCGA-BLCA”
type: “clinical"
The relevant data can be obtained by downloading data from all cancer types and patients given in sheet 4
Further information for sheet 5: TCGAexome_survival_samples
A total of 5,336 TCGA exome samples have clinical survival data available. The clinical data can be downloaded following the same steps stated for sheet 4, for cancer types and patients given in sheet 5

## Sheet: TCGAexome_expression_samples
patient	cancer_type	sample_id
A5JA	ACC	TCGA-OR-A5JA-01A-11R-A29S-07
A5J8	ACC	TCGA-OR-A5J8-01A-11R-A29S-07
A5OF	ACC	TCGA-P6-A5OF-01A-11R-A29S-07
A5KY	ACC	TCGA-OR-A5KY-01A-11R-A29S-07
A5J2	ACC	TCGA-OR-A5J2-01A-11R-A29S-07
A5JJ	ACC	TCGA-OR-A5JJ-01A-11R-A29S-07
A5LH	ACC	TCGA-OR-A5LH-01A-11R-A29S-07
A5J5	ACC	TCGA-OR-A5J5-01A-11R-A29S-07
A5L5	ACC	TCGA-OR-A5L5-01A-11R-A29S-07
A5JL	ACC	TCGA-OR-A5JL-01A-11R-A29S-07
A5LJ	ACC	TCGA-OR-A5LJ-01A-11R-A29S-07
A5JF	ACC	TCGA-OR-A5JF-01A-11R-A29S-07
A5JY	ACC	TCGA-OR-A5JY-01A-31R-A29S-07
A5LP	ACC	TCGA-OR-A5LP-01A-11R-A29S-07
A5J3	ACC	TCGA-OR-A5J3-01A-11R-A29S-07
A5KW	ACC	TCGA-OR-A5KW-01A-11R-A29S-07
A5HB	ACC	TCGA-PK-A5HB-01A-11R-A29S-07
A5JK	ACC	TCGA-OR-A5JK-01A-11R-A29S-07
A5JD	ACC	TCGA-OR-A5JD-01A-11R-A29S-07
A5JP	ACC	TCGA-OR-A5JP-01A-11R-A29S-07
A5JQ	ACC	TCGA-OR-A5JQ-01A-11R-A29S-07
A5JC	ACC	TCGA-OR-A5JC-01A-11R-A29S-07
A5JV	ACC	TCGA-OR-A5JV-01A-11R-A29S-07
A5KV	ACC	TCGA-OR-A5KV-01A-11R-A29S-07
A5H9	ACC	TCGA-PK-A5H9-01A-11R-A29S-07
A5JG	ACC	TCGA-OR-A5JG-01A-11R-A29S-07
A5J9	ACC	TCGA-OR-A5J9-01A-11R-A29S-07
A5LO	ACC	TCGA-OR-A5LO-01A-11R-A29S-07
A5JT	ACC	TCGA-OR-A5JT-01A-11R-A29S-07
A5PI	ACC	TCGA-OU-A5PI-01A-12R-A29S-07
A5J7	ACC	TCGA-OR-A5J7-01A-11R-A29S-07
A5KO	ACC	TCGA-OR-A5KO-01A-11R-A29S-07
A5J1	ACC	TCGA-OR-A5J1-01A-11R-A29S-07
A5KZ	ACC	TCGA-OR-A5KZ-01A-11R-A29S-07
A5JR	ACC	TCGA-OR-A5JR-01A-11R-A29S-07
A5K4	ACC	TCGA-OR-A5K4-01A-11R-A29S-07
A5JS	ACC	TCGA-OR-A5JS-01A-11R-A29S-07
A5K5	ACC	TCGA-OR-A5K5-01A-11R-A29S-07
A5H8	ACC	TCGA-PK-A5H8-01A-11R-A29S-07
A5L8	ACC	TCGA-OR-A5L8-01A-11R-A29S-07
A5JW	ACC	TCGA-OR-A5JW-01A-11R-A29S-07
A5JO	ACC	TCGA-OR-A5JO-01A-11R-A29S-07
A5JX	ACC	TCGA-OR-A5JX-01A-11R-A29S-07
A5LS	ACC	TCGA-OR-A5LS-01A-11R-A29S-07
A5KU	ACC	TCGA-OR-A5KU-01A-11R-A29S-07
A5K0	ACC	TCGA-OR-A5K0-01A-11R-A29S-07
A5K6	ACC	TCGA-OR-A5K6-01A-11R-A29S-07
A5KX	ACC	TCGA-OR-A5KX-01A-11R-A29S-07
A5HA	ACC	TCGA-PK-A5HA-01A-11R-A29S-07
A5LR	ACC	TCGA-OR-A5LR-01A-11R-A29S-07
A5JM	ACC	TCGA-OR-A5JM-01A-11R-A29S-07
A5JI	ACC	TCGA-OR-A5JI-01A-11R-A29S-07
A5LG	ACC	TCGA-OR-A5LG-01A-11R-A29S-07
A5JB	ACC	TCGA-OR-A5JB-01A-11R-A29S-07
A5LB	ACC	TCGA-OR-A5LB-01A-11R-A29S-07
A5JE	ACC	TCGA-OR-A5JE-01A-11R-A29S-07
A5J6	ACC	TCGA-OR-A5J6-01A-31R-A29S-07
A5LK	ACC	TCGA-OR-A5LK-01A-11R-A29S-07
A5KT	ACC	TCGA-OR-A5KT-01A-11R-A29S-07
A5LT	ACC	TCGA-OR-A5LT-01A-11R-A29S-07
A5K9	ACC	TCGA-OR-A5K9-01A-11R-A29S-07
A5LE	ACC	TCGA-OR-A5LE-01A-11R-A29S-07
A5LL	ACC	TCGA-OR-A5LL-01A-11R-A29S-07
A5JZ	ACC	TCGA-OR-A5JZ-01A-11R-A29S-07
A5K1	ACC	TCGA-OR-A5K1-01A-11R-A29S-07
A5LC	ACC	TCGA-OR-A5LC-01A-11R-A29S-07
A5LA	ACC	TCGA-OR-A5LA-01A-11R-A29S-07
A5K2	ACC	TCGA-OR-A5K2-01A-11R-A29S-07
A5L4	ACC	TCGA-OR-A5L4-01A-11R-A29S-07
A5K3	ACC	TCGA-OR-A5K3-01A-11R-A29S-07
A5LN	ACC	TCGA-OR-A5LN-01A-11R-A29S-07
A5L6	ACC	TCGA-OR-A5L6-01A-11R-A29S-07
A5K8	ACC	TCGA-OR-A5K8-01A-11R-A29S-07
A5L3	ACC	TCGA-OR-A5L3-01A-11R-A29S-07
A5LD	ACC	TCGA-OR-A5LD-01A-11R-A29S-07
A5L9	ACC	TCGA-OR-A5L9-01A-11R-A29S-07
A5YG	ACC	TCGA-PA-A5YG-01A-11R-A29S-07
A5OG	ACC	TCGA-P6-A5OG-01A-22R-A29S-07
A0S7	BLCA	TCGA-BT-A0S7-01A-11R-A10U-07
A0YX	BLCA	TCGA-BT-A0YX-01A-11R-A10U-07
A0F0	BLCA	TCGA-C4-A0F0-01A-12R-A10U-07
A0F6	BLCA	TCGA-C4-A0F6-01A-11R-A10U-07
A0YN	BLCA	TCGA-CU-A0YN-01A-21R-A10U-07
A0YR	BLCA	TCGA-CU-A0YR-01A-12R-A10U-07
A0YO	BLCA	TCGA-CU-A0YO-01A-11R-A10U-07
A1HR	BLCA	TCGA-CF-A1HR-01A-11R-A13Y-07
A13I	BLCA	TCGA-BL-A13I-01A-11R-A13Y-07
A1HS	BLCA	TCGA-CF-A1HS-01A-11R-A13Y-07
A1A3	BLCA	TCGA-DK-A1A3-01A-11R-A13Y-07
A20J	BLCA	TCGA-BT-A20J-01A-11R-A14Y-07
A20N	BLCA	TCGA-BT-A20N-01A-11R-A14Y-07
A20O	BLCA	TCGA-BT-A20O-01A-21R-A14Y-07
A20U	BLCA	TCGA-BT-A20U-01A-11R-A14Y-07
A20W	BLCA	TCGA-BT-A20W-01A-21R-A14Y-07
A0C8	BLCA	TCGA-BL-A0C8-01A-11R-A10U-07
A1A7	BLCA	TCGA-DK-A1A7-01A-11R-A13Y-07
A1AB	BLCA	TCGA-DK-A1AB-01A-11R-A13Y-07
A1AC	BLCA	TCGA-DK-A1AC-01A-11R-A13Y-07
A1AD	BLCA	TCGA-DK-A1AD-01A-11R-A13Y-07
A1AF	BLCA	TCGA-DK-A1AF-01A-11R-A13Y-07
A20R	BLCA	TCGA-BT-A20R-01A-12R-A16R-07
A20X	BLCA	TCGA-BT-A20X-01A-11R-A16R-07
A2LB	BLCA	TCGA-BT-A2LB-01A-11R-A18C-07
A2HX	BLCA	TCGA-DK-A2HX-01A-12R-A18C-07
A2I1	BLCA	TCGA-DK-A2I1-01A-11R-A180-07
A2I2	BLCA	TCGA-DK-A2I2-01A-11R-A180-07
A2I6	BLCA	TCGA-DK-A2I6-01A-12R-A18C-07
A2PC	BLCA	TCGA-E5-A2PC-01A-11R-A206-07
A3B3	BLCA	TCGA-FD-A3B3-01A-12R-A206-07
A3B4	BLCA	TCGA-FD-A3B4-01A-12R-A206-07
A2EC	BLCA	TCGA-G2-A2EC-01A-11R-A180-07
A2EF	BLCA	TCGA-G2-A2EF-01A-12R-A18C-07
A2EJ	BLCA	TCGA-G2-A2EJ-01A-11R-A180-07
A2EK	BLCA	TCGA-G2-A2EK-01A-22R-A18C-07
A2EL	BLCA	TCGA-G2-A2EL-01A-12R-A18C-07
A2EO	BLCA	TCGA-G2-A2EO-01A-11R-A180-07
A2ES	BLCA	TCGA-G2-A2ES-01A-11R-A180-07
A2HO	BLCA	TCGA-H4-A2HO-01A-11R-A180-07
A2OE	BLCA	TCGA-HQ-A2OE-01A-11R-A206-07
A3JX	BLCA	TCGA-GV-A3JX-01A-11R-A20F-07
A3JW	BLCA	TCGA-GV-A3JW-01A-11R-A20F-07
A3I6	BLCA	TCGA-GC-A3I6-01A-11R-A20F-07
A3MG	BLCA	TCGA-CF-A3MG-01A-11R-A20F-07
A2LD	BLCA	TCGA-BT-A2LD-01A-12R-A20F-07
A3B6	BLCA	TCGA-FD-A3B6-01A-21R-A20F-07
A3IT	BLCA	TCGA-DK-A3IT-01A-31R-A20F-07
A3IN	BLCA	TCGA-DK-A3IN-01A-11R-A20F-07
A3B8	BLCA	TCGA-FD-A3B8-01A-31R-A20F-07
A3MI	BLCA	TCGA-CF-A3MI-01A-11R-A20F-07
A3IE	BLCA	TCGA-G2-A3IE-01A-11R-A20F-07
A3NA	BLCA	TCGA-FD-A3NA-01A-11R-A21D-07
A3B7	BLCA	TCGA-FD-A3B7-01A-31R-A20F-07
A3MH	BLCA	TCGA-CF-A3MH-01A-11R-A20F-07
A3IB	BLCA	TCGA-G2-A3IB-01A-11R-A20F-07
A3IU	BLCA	TCGA-DK-A3IU-01A-11R-A20F-07
A3IS	BLCA	TCGA-DK-A3IS-01A-21R-A21D-07
A3IM	BLCA	TCGA-DK-A3IM-01A-11R-A20F-07
A2I4	BLCA	TCGA-DK-A2I4-01A-11R-A21D-07
A3IV	BLCA	TCGA-DK-A3IV-01A-22R-A21D-07
A3IK	BLCA	TCGA-DK-A3IK-01A-32R-A21D-07
A3B5	BLCA	TCGA-FD-A3B5-01A-11R-A20F-07
A3JM	BLCA	TCGA-BL-A3JM-01A-12R-A21D-07
A3JZ	BLCA	TCGA-GV-A3JZ-01A-11R-A21D-07
A3KJ	BLCA	TCGA-CU-A3KJ-01A-11R-A21D-07
A3PK	BLCA	TCGA-BT-A3PK-01A-21R-A220-07
A3RB	BLCA	TCGA-GC-A3RB-01A-12R-A220-07
A3OP	BLCA	TCGA-GD-A3OP-01A-21R-A220-07
A3OQ	BLCA	TCGA-GD-A3OQ-01A-32R-A220-07
A3OS	BLCA	TCGA-GD-A3OS-01A-12R-A220-07
A3JV	BLCA	TCGA-GV-A3JV-01A-11R-A220-07
A3QG	BLCA	TCGA-GV-A3QG-01A-11R-A220-07
A3QH	BLCA	TCGA-GV-A3QH-01A-11R-A220-07
A3QI	BLCA	TCGA-GV-A3QI-01A-11R-A220-07
A3QU	BLCA	TCGA-CU-A3QU-01A-11R-A22U-07
A3YL	BLCA	TCGA-CU-A3YL-01A-11R-A22U-07
A3WX	BLCA	TCGA-DK-A3WX-01A-22R-A22U-07
A3WY	BLCA	TCGA-DK-A3WY-01A-11R-A22U-07
A3X1	BLCA	TCGA-DK-A3X1-01A-12R-A22U-07
A3X2	BLCA	TCGA-DK-A3X2-01A-11R-A22U-07
A3X6	BLCA	TCGA-E7-A3X6-01A-12R-A22U-07
A3Y1	BLCA	TCGA-E7-A3Y1-01A-11R-A22U-07
A3SJ	BLCA	TCGA-FD-A3SJ-01A-12R-A22U-07
A3SL	BLCA	TCGA-FD-A3SL-01A-21R-A22U-07
A3SM	BLCA	TCGA-FD-A3SM-01A-11R-A22U-07
A3SN	BLCA	TCGA-FD-A3SN-01A-12R-A22U-07
A3SO	BLCA	TCGA-FD-A3SO-01A-11R-A22U-07
A3SP	BLCA	TCGA-FD-A3SP-01A-31R-A22U-07
A3SQ	BLCA	TCGA-FD-A3SQ-01A-21R-A22U-07
A3SR	BLCA	TCGA-FD-A3SR-01A-11R-A22U-07
A3SS	BLCA	TCGA-FD-A3SS-01A-12R-A22U-07
A3VY	BLCA	TCGA-G2-A3VY-01A-11R-A22U-07
A3BM	BLCA	TCGA-GC-A3BM-01A-11R-A22U-07
A3OO	BLCA	TCGA-GC-A3OO-01A-11R-A22U-07
A3RC	BLCA	TCGA-GC-A3RC-01A-11R-A22U-07
A3RD	BLCA	TCGA-GC-A3RD-01A-12R-A22U-07
A3WC	BLCA	TCGA-GC-A3WC-01A-31R-A22U-07
A3QF	BLCA	TCGA-GV-A3QF-01A-31R-A22U-07
A3WS	BLCA	TCGA-K4-A3WS-01A-11R-A22U-07
A3WV	BLCA	TCGA-K4-A3WV-01A-11R-A22U-07
A0F1	BLCA	TCGA-C4-A0F1-01A-11R-A034-07
A0F7	BLCA	TCGA-C4-A0F7-01A-11R-A084-07
A0EZ	BLCA	TCGA-C4-A0EZ-01A-21R-A24X-07
A42C	BLCA	TCGA-BT-A42C-01A-11R-A23N-07
A3WW	BLCA	TCGA-DK-A3WW-01A-22R-A23N-07
A3ZE	BLCA	TCGA-FJ-A3ZE-01A-11R-A23N-07
A3ZF	BLCA	TCGA-FJ-A3ZF-01A-11R-A23N-07
A3YS	BLCA	TCGA-GC-A3YS-01A-11R-A23N-07
A42R	BLCA	TCGA-GU-A42R-01A-11R-A23N-07
A3QK	BLCA	TCGA-GV-A3QK-01B-11R-A23N-07
A40E	BLCA	TCGA-GV-A40E-01A-12R-A23N-07
A40G	BLCA	TCGA-GV-A40G-01A-11R-A23N-07
A3WU	BLCA	TCGA-K4-A3WU-01B-11R-A23N-07
A3Z7	BLCA	TCGA-FJ-A3Z7-01A-12R-A23N-07
A42F	BLCA	TCGA-BT-A42F-01A-11R-A23W-07
A42E	BLCA	TCGA-BT-A42E-01A-11R-A23W-07
A47T	BLCA	TCGA-CF-A47T-01A-11R-A23W-07
A47S	BLCA	TCGA-CF-A47S-01A-11R-A23W-07
A47V	BLCA	TCGA-CF-A47V-01A-11R-A23W-07
A47W	BLCA	TCGA-CF-A47W-01A-11R-A23W-07
A47X	BLCA	TCGA-CF-A47X-01A-31R-A23W-07
A47Y	BLCA	TCGA-CF-A47Y-01A-11R-A23W-07
A43N	BLCA	TCGA-FD-A43N-01A-11R-A23W-07
A43P	BLCA	TCGA-FD-A43P-01A-31R-A23W-07
A43S	BLCA	TCGA-FD-A43S-01A-21R-A23W-07
A43U	BLCA	TCGA-FD-A43U-01A-11R-A23W-07
A43X	BLCA	TCGA-FD-A43X-01A-11R-A23W-07
A42P	BLCA	TCGA-GU-A42P-01A-11R-A23W-07
A42Q	BLCA	TCGA-GU-A42Q-01A-11R-A23W-07
A5U8	BLCA	TCGA-CF-A5U8-01A-11R-A28M-07
A5UA	BLCA	TCGA-CF-A5UA-01A-11R-A28M-07
A5W6	BLCA	TCGA-CU-A5W6-01A-11R-A28M-07
A5KE	BLCA	TCGA-E7-A5KE-01A-11R-A28M-07
A5KF	BLCA	TCGA-E7-A5KF-01A-11R-A28M-07
A5BY	BLCA	TCGA-FD-A5BY-01A-31R-A28M-07
A5BZ	BLCA	TCGA-FD-A5BZ-01A-11R-A28M-07
A5C0	BLCA	TCGA-FD-A5C0-01A-11R-A28M-07
A5C1	BLCA	TCGA-FD-A5C1-01A-11R-A28M-07
A5NE	BLCA	TCGA-HQ-A5NE-01A-12R-A28M-07
A4AB	BLCA	TCGA-K4-A4AB-01B-12R-A28M-07
A5RI	BLCA	TCGA-K4-A5RI-01A-11R-A28M-07
A5RJ	BLCA	TCGA-K4-A5RJ-01A-11R-A28M-07
A5Z6	BLCA	TCGA-LT-A5Z6-01A-11R-A28M-07
A4IJ	BLCA	TCGA-E7-A4IJ-01A-31R-A26T-07
A4XJ	BLCA	TCGA-E7-A4XJ-01A-11R-A26T-07
A541	BLCA	TCGA-E7-A541-01A-11R-A26T-07
A43Y	BLCA	TCGA-FD-A43Y-01A-21R-A26T-07
A5BR	BLCA	TCGA-FD-A5BR-01A-11R-A26T-07
A5BS	BLCA	TCGA-FD-A5BS-01A-21R-A26T-07
A5BT	BLCA	TCGA-FD-A5BT-01A-11R-A26T-07
A5BU	BLCA	TCGA-FD-A5BU-01A-31R-A26T-07
A5BV	BLCA	TCGA-FD-A5BV-01A-11R-A26T-07
A5BX	BLCA	TCGA-FD-A5BX-01A-11R-A26T-07
A3Z9	BLCA	TCGA-FJ-A3Z9-01A-11R-A26T-07
A4ZW	BLCA	TCGA-GC-A4ZW-01A-11R-A26T-07
A2OF	BLCA	TCGA-HQ-A2OF-01A-11R-A26T-07
A5ND	BLCA	TCGA-HQ-A5ND-01A-11R-A26T-07
A4AC	BLCA	TCGA-K4-A4AC-01A-21R-A26T-07
A54R	BLCA	TCGA-K4-A54R-01A-11R-A26T-07
A51V	BLCA	TCGA-MV-A51V-01A-11R-A26T-07
A5ZZ	BLCA	TCGA-BL-A5ZZ-01A-31R-A30C-07
A6AV	BLCA	TCGA-DK-A6AV-01A-12R-A30C-07
A6AW	BLCA	TCGA-DK-A6AW-01A-11R-A30C-07
A6B0	BLCA	TCGA-DK-A6B0-01A-11R-A31N-07
A6B1	BLCA	TCGA-DK-A6B1-01A-12R-A30C-07
A6B2	BLCA	TCGA-DK-A6B2-01A-11R-A30C-07
A6B5	BLCA	TCGA-DK-A6B5-01A-11R-A31N-07
A6B6	BLCA	TCGA-DK-A6B6-01A-11R-A30C-07
A4TZ	BLCA	TCGA-E5-A4TZ-01A-11R-A31N-07
A4U1	BLCA	TCGA-E5-A4U1-01A-11R-A31N-07
A519	BLCA	TCGA-E7-A519-01A-11R-A26T-07
A677	BLCA	TCGA-E7-A677-01A-11R-A30C-07
A678	BLCA	TCGA-E7-A678-01A-11R-A30C-07
A62N	BLCA	TCGA-FD-A62N-01A-11R-A30C-07
A62O	BLCA	TCGA-FD-A62O-01A-11R-A30C-07
A62P	BLCA	TCGA-FD-A62P-01A-32R-A30C-07
A62S	BLCA	TCGA-FD-A62S-01A-11R-A30C-07
A61P	BLCA	TCGA-FT-A61P-01A-11R-A30C-07
A6I1	BLCA	TCGA-GC-A6I1-01A-12R-A31N-07
A6I3	BLCA	TCGA-GC-A6I3-01A-11R-A31N-07
A6C6	BLCA	TCGA-GD-A6C6-01A-21R-A31N-07
A5RH	BLCA	TCGA-K4-A5RH-01A-11R-A30C-07
A6FZ	BLCA	TCGA-K4-A6FZ-01A-11R-A31N-07
A6MB	BLCA	TCGA-K4-A6MB-01A-11R-A31N-07
A66R	BLCA	TCGA-LC-A66R-01A-41R-A30C-07
A6FI	BLCA	TCGA-PQ-A6FI-01A-11R-A31N-07
A6FN	BLCA	TCGA-PQ-A6FN-01A-11R-A31N-07
A69X	BLCA	TCGA-R3-A69X-01A-22R-A30C-07
A6DX	BLCA	TCGA-S5-A6DX-01A-11R-A31N-07
A3IQ	BLCA	TCGA-DK-A3IQ-01A-31R-A32Y-07
A6ME	BLCA	TCGA-E7-A6ME-01A-22R-A32O-07
A6MF	BLCA	TCGA-E7-A6MF-01A-12R-A32O-07
A7DU	BLCA	TCGA-E7-A7DU-01A-11R-A32O-07
A6TF	BLCA	TCGA-FD-A6TF-01A-52R-A32O-07
A6TG	BLCA	TCGA-FD-A6TG-01A-11R-A32O-07
A6TH	BLCA	TCGA-FD-A6TH-01A-11R-A32O-07
A6TI	BLCA	TCGA-FD-A6TI-01A-11R-A32O-07
A76B	BLCA	TCGA-GD-A76B-01A-11R-A32O-07
A763	BLCA	TCGA-GU-A763-01A-11R-A32O-07
A766	BLCA	TCGA-GU-A766-01A-11R-A32O-07
A767	BLCA	TCGA-GU-A767-01A-11R-A32O-07
A72E	BLCA	TCGA-CU-A72E-01A-12R-A33J-07
A7DV	BLCA	TCGA-E7-A7DV-01A-11R-A33J-07
A6TA	BLCA	TCGA-FD-A6TA-01A-12R-A33J-07
A6TB	BLCA	TCGA-FD-A6TB-01A-12R-A33J-07
A6TC	BLCA	TCGA-FD-A6TC-01A-21R-A33J-07
A6TD	BLCA	TCGA-FD-A6TD-01A-51R-A33J-07
A6TE	BLCA	TCGA-FD-A6TE-01A-12R-A33J-07
A6TK	BLCA	TCGA-FD-A6TK-01A-42R-A33J-07
A762	BLCA	TCGA-GU-A762-01A-11R-A33J-07
A6ZA	BLCA	TCGA-GV-A6ZA-01A-12R-A33J-07
A41N	BLCA	TCGA-KQ-A41N-01A-11R-A33J-07
A41P	BLCA	TCGA-KQ-A41P-01A-12R-A33J-07
A41Q	BLCA	TCGA-KQ-A41Q-01A-11R-A33J-07
A41S	BLCA	TCGA-KQ-A41S-01A-12R-A33J-07
A78K	BLCA	TCGA-UY-A78K-01A-11R-A33J-07
A78L	BLCA	TCGA-UY-A78L-01A-12R-A33J-07
A78N	BLCA	TCGA-UY-A78N-01A-12R-A33J-07
A78O	BLCA	TCGA-UY-A78O-01A-12R-A33J-07
A08P	BRCA	TCGA-A8-A08P-01A-11R-A00Z-07
A03O	BRCA	TCGA-AO-A03O-01A-11R-A00Z-07
A04V	BRCA	TCGA-A2-A04V-01A-21R-A034-07
A041	BRCA	TCGA-AN-A041-01A-11R-A034-07
A04A	BRCA	TCGA-AN-A04A-01A-21R-A034-07
A04C	BRCA	TCGA-AN-A04C-01A-21R-A034-07
A03T	BRCA	TCGA-AO-A03T-01A-21R-A034-07
A0CH	BRCA	TCGA-A7-A0CH-01A-21R-A00Z-07
A06T	BRCA	TCGA-A8-A06T-01A-11R-A00Z-07
A07F	BRCA	TCGA-A8-A07F-01A-11R-A00Z-07
A081	BRCA	TCGA-A8-A081-01A-11R-A00Z-07
A08C	BRCA	TCGA-A8-A08C-01A-11R-A00Z-07
A08T	BRCA	TCGA-A8-A08T-01A-21R-A00Z-07
A082	BRCA	TCGA-A8-A082-01A-11R-A00Z-07
A08F	BRCA	TCGA-A8-A08F-01A-11R-A00Z-07
A08X	BRCA	TCGA-A8-A08X-01A-21R-A00Z-07
A09K	BRCA	TCGA-A8-A09K-01A-11R-A00Z-07
A0AY	BRCA	TCGA-BH-A0AY-01A-21R-A00Z-07
A06X	BRCA	TCGA-A8-A06X-01A-21R-A00Z-07
A07J	BRCA	TCGA-A8-A07J-01A-11R-A00Z-07
A09C	BRCA	TCGA-A8-A09C-01A-11R-A00Z-07
A09Q	BRCA	TCGA-A8-A09Q-01A-11R-A00Z-07
A0A7	BRCA	TCGA-A8-A0A7-01A-11R-A00Z-07
A04Y	BRCA	TCGA-A2-A04Y-01A-21R-A034-07
A0CQ	BRCA	TCGA-A2-A0CQ-01A-21R-A034-07
A0CU	BRCA	TCGA-A2-A0CU-01A-12R-A034-07
A06Q	BRCA	TCGA-A8-A06Q-01A-11R-A034-07
A07C	BRCA	TCGA-A8-A07C-01A-11R-A034-07
A0CD	BRCA	TCGA-A7-A0CD-01A-11R-A00Z-07
A0DB	BRCA	TCGA-A7-A0DB-01A-11R-A00Z-07
A06O	BRCA	TCGA-A8-A06O-01A-11R-A00Z-07
A076	BRCA	TCGA-A8-A076-01A-21R-A00Z-07
A07P	BRCA	TCGA-A8-A07P-01A-11R-A00Z-07
A086	BRCA	TCGA-A8-A086-01A-11R-A00Z-07
A08J	BRCA	TCGA-A8-A08J-01A-11R-A00Z-07
A07G	BRCA	TCGA-A8-A07G-01A-11R-A034-07
A07R	BRCA	TCGA-A8-A07R-01A-21R-A034-07
A07U	BRCA	TCGA-A8-A07U-01A-11R-A034-07
A08R	BRCA	TCGA-A8-A08R-01A-11R-A034-07
A097	BRCA	TCGA-A8-A097-01A-11R-A034-07
A09V	BRCA	TCGA-A8-A09V-01A-11R-A034-07
A0A2	BRCA	TCGA-A8-A0A2-01A-11R-A034-07
A0AB	BRCA	TCGA-A8-A0AB-01A-11R-A034-07
A0AM	BRCA	TCGA-AN-A0AM-01A-11R-A034-07
A0BD	BRCA	TCGA-BH-A0BD-01A-11R-A034-07
A09B	BRCA	TCGA-A8-A09B-01A-11R-A00Z-07
A0A4	BRCA	TCGA-A8-A0A4-01A-11R-A00Z-07
A0AL	BRCA	TCGA-AN-A0AL-01A-11R-A00Z-07
A0FV	BRCA	TCGA-AN-A0FV-01A-11R-A00Z-07
A0BV	BRCA	TCGA-BH-A0BV-01A-11R-A00Z-07
A06Y	BRCA	TCGA-A8-A06Y-01A-21R-A00Z-07
A07L	BRCA	TCGA-A8-A07L-01A-11R-A00Z-07
A08H	BRCA	TCGA-A8-A08H-01A-21R-A00Z-07
A090	BRCA	TCGA-A8-A090-01A-11R-A00Z-07
A09A	BRCA	TCGA-A8-A09A-01A-11R-A00Z-07
A09N	BRCA	TCGA-A8-A09N-01A-11R-A00Z-07
A0A1	BRCA	TCGA-A8-A0A1-01A-11R-A00Z-07
A049	BRCA	TCGA-AN-A049-01A-21R-A00Z-07
A06P	BRCA	TCGA-A8-A06P-01A-11R-A00Z-07
A079	BRCA	TCGA-A8-A079-01A-21R-A00Z-07
A07W	BRCA	TCGA-A8-A07W-01A-11R-A00Z-07
A0AK	BRCA	TCGA-AN-A0AK-01A-21R-A00Z-07
A0FJ	BRCA	TCGA-AN-A0FJ-01A-11R-A00Z-07
A0CZ	BRCA	TCGA-A2-A0CZ-01A-11R-A034-07
A0EM	BRCA	TCGA-A2-A0EM-01A-11R-A034-07
A0EO	BRCA	TCGA-A2-A0EO-01A-11R-A034-07
A0EQ	BRCA	TCGA-A2-A0EQ-01A-11R-A034-07
A0ER	BRCA	TCGA-A2-A0ER-01A-21R-A034-07
A093	BRCA	TCGA-A8-A093-01A-11R-A00Z-07
A09D	BRCA	TCGA-A8-A09D-01A-11R-A00Z-07
A09R	BRCA	TCGA-A8-A09R-01A-11R-A00Z-07
A0A9	BRCA	TCGA-A8-A0A9-01A-11R-A00Z-07
A0E7	BRCA	TCGA-BH-A0E7-01A-11R-A034-07
A0EB	BRCA	TCGA-BH-A0EB-01A-11R-A034-07
A0EE	BRCA	TCGA-BH-A0EE-01A-11R-A034-07
A0SE	BRCA	TCGA-A1-A0SE-01A-11R-A084-07
A0ST	BRCA	TCGA-A2-A0ST-01A-12R-A084-07
A0SU	BRCA	TCGA-A2-A0SU-01A-11R-A084-07
A0T2	BRCA	TCGA-A2-A0T2-01A-11R-A084-07
A0T4	BRCA	TCGA-A2-A0T4-01A-31R-A084-07
A0TT	BRCA	TCGA-AR-A0TT-01A-31R-A084-07
A0TV	BRCA	TCGA-AR-A0TV-01A-21R-A084-07
A0RM	BRCA	TCGA-B6-A0RM-01A-11R-A084-07
A0RN	BRCA	TCGA-B6-A0RN-01A-12R-A084-07
A0DH	BRCA	TCGA-BH-A0DH-01A-11R-A084-07
A0DQ	BRCA	TCGA-BH-A0DQ-01A-11R-A084-07
A0JJ	BRCA	TCGA-AO-A0JJ-01A-11R-A056-07
A0JL	BRCA	TCGA-AO-A0JL-01A-11R-A056-07
A0IK	BRCA	TCGA-B6-A0IK-01A-12R-A056-07
A0RG	BRCA	TCGA-B6-A0RG-01A-11R-A056-07
A0RI	BRCA	TCGA-B6-A0RI-01A-11R-A056-07
A0AW	BRCA	TCGA-BH-A0AW-01A-11R-A056-07
A0B1	BRCA	TCGA-BH-A0B1-01A-12R-A056-07
A0B8	BRCA	TCGA-BH-A0B8-01A-21R-A056-07
A0BA	BRCA	TCGA-BH-A0BA-01A-11R-A056-07
A0BJ	BRCA	TCGA-BH-A0BJ-01A-11R-A056-07
A0RX	BRCA	TCGA-BH-A0RX-01A-21R-A084-07
A0CT	BRCA	TCGA-A2-A0CT-01A-31R-A056-07
A0EU	BRCA	TCGA-A2-A0EU-01A-22R-A056-07
A0D9	BRCA	TCGA-A7-A0D9-01A-31R-A056-07
A08O	BRCA	TCGA-A8-A08O-01A-21R-A056-07
A0A6	BRCA	TCGA-A8-A0A6-01A-12R-A056-07
A0AD	BRCA	TCGA-A8-A0AD-01A-11R-A056-07
A0JA	BRCA	TCGA-AO-A0JA-01A-11R-A056-07
A0JC	BRCA	TCGA-AO-A0JC-01A-11R-A056-07
A0JD	BRCA	TCGA-AO-A0JD-01A-11R-A056-07
A0JE	BRCA	TCGA-AO-A0JE-01A-11R-A056-07
A0JF	BRCA	TCGA-AO-A0JF-01A-11R-A056-07
A0JI	BRCA	TCGA-AO-A0JI-01A-21R-A056-07
A0BM	BRCA	TCGA-BH-A0BM-01A-11R-A056-07
A0C0	BRCA	TCGA-BH-A0C0-01A-21R-A056-07
A0DK	BRCA	TCGA-BH-A0DK-01A-21R-A056-07
A0DP	BRCA	TCGA-BH-A0DP-01A-21R-A056-07
A0DS	BRCA	TCGA-BH-A0DS-01A-11R-A056-07
A0E1	BRCA	TCGA-BH-A0E1-01A-11R-A056-07
A0E2	BRCA	TCGA-BH-A0E2-01A-11R-A056-07
A0GY	BRCA	TCGA-BH-A0GY-01A-11R-A056-07
A0GZ	BRCA	TCGA-BH-A0GZ-01A-11R-A056-07
A0H9	BRCA	TCGA-BH-A0H9-01A-11R-A056-07
A0HB	BRCA	TCGA-BH-A0HB-01A-11R-A056-07
A0HF	BRCA	TCGA-BH-A0HF-01A-11R-A056-07
A0SO	BRCA	TCGA-A1-A0SO-01A-22R-A084-07
A0SP	BRCA	TCGA-A1-A0SP-01A-11R-A084-07
A0T0	BRCA	TCGA-A2-A0T0-01A-22R-A084-07
A0T1	BRCA	TCGA-A2-A0T1-01A-21R-A084-07
A0JG	BRCA	TCGA-AO-A0JG-01A-31R-A084-07
A0TQ	BRCA	TCGA-AR-A0TQ-01A-11R-A084-07
A0TR	BRCA	TCGA-AR-A0TR-01A-11R-A084-07
A0RL	BRCA	TCGA-B6-A0RL-01A-11R-A084-07
A0RV	BRCA	TCGA-B6-A0RV-01A-11R-A084-07
A0BC	BRCA	TCGA-BH-A0BC-01A-22R-A084-07
A0SK	BRCA	TCGA-A1-A0SK-01A-12R-A084-07
A0SX	BRCA	TCGA-A2-A0SX-01A-12R-A084-07
A0SY	BRCA	TCGA-A2-A0SY-01A-31R-A084-07
A0SH	BRCA	TCGA-A1-A0SH-01A-11R-A084-07
A0SJ	BRCA	TCGA-A1-A0SJ-01A-11R-A084-07
A0EN	BRCA	TCGA-A2-A0EN-01A-13R-A084-07
A0SV	BRCA	TCGA-A2-A0SV-01A-11R-A084-07
A0SW	BRCA	TCGA-A2-A0SW-01A-11R-A084-07
A0T5	BRCA	TCGA-A2-A0T5-01A-21R-A084-07
A0T6	BRCA	TCGA-A2-A0T6-01A-11R-A084-07
A0TW	BRCA	TCGA-AR-A0TW-01A-11R-A084-07
A0RO	BRCA	TCGA-B6-A0RO-01A-22R-A084-07
A0RP	BRCA	TCGA-B6-A0RP-01A-21R-A084-07
A0HI	BRCA	TCGA-BH-A0HI-01A-11R-A084-07
A0HK	BRCA	TCGA-BH-A0HK-01A-11R-A056-07
A0HX	BRCA	TCGA-BH-A0HX-01A-21R-A056-07
A0HY	BRCA	TCGA-BH-A0HY-01A-11R-A056-07
A0I5	BRCA	TCGA-B6-A0I5-01A-11R-A034-07
A0I6	BRCA	TCGA-B6-A0I6-01A-11R-A034-07
A0I8	BRCA	TCGA-B6-A0I8-01A-11R-A034-07
A0I9	BRCA	TCGA-B6-A0I9-01A-11R-A034-07
A0IA	BRCA	TCGA-B6-A0IA-01A-11R-A034-07
A0IB	BRCA	TCGA-B6-A0IB-01A-11R-A034-07
A0IC	BRCA	TCGA-B6-A0IC-01A-11R-A034-07
A0IE	BRCA	TCGA-B6-A0IE-01A-11R-A034-07
A0IG	BRCA	TCGA-B6-A0IG-01A-11R-A034-07
A0HO	BRCA	TCGA-BH-A0HO-01A-11R-A034-07
A0HQ	BRCA	TCGA-BH-A0HQ-01A-11R-A034-07
A0HU	BRCA	TCGA-BH-A0HU-01A-11R-A034-07
A0HW	BRCA	TCGA-BH-A0HW-01A-11R-A034-07
A0FN	BRCA	TCGA-AN-A0FN-01A-11R-A034-07
A0FS	BRCA	TCGA-AN-A0FS-01A-11R-A034-07
A0FT	BRCA	TCGA-AN-A0FT-01A-11R-A034-07
A0FW	BRCA	TCGA-AN-A0FW-01A-11R-A034-07
A0FX	BRCA	TCGA-AN-A0FX-01A-11R-A034-07
A0FY	BRCA	TCGA-AN-A0FY-01A-11R-A034-07
A0G0	BRCA	TCGA-AN-A0G0-01A-11R-A034-07
A0T7	BRCA	TCGA-A2-A0T7-01A-21R-A084-07
A0TP	BRCA	TCGA-AR-A0TP-01A-11R-A084-07
A0TZ	BRCA	TCGA-AR-A0TZ-01A-12R-A084-07
A0RS	BRCA	TCGA-B6-A0RS-01A-11R-A084-07
A0HP	BRCA	TCGA-BH-A0HP-01A-12R-A084-07
A0ET	BRCA	TCGA-A2-A0ET-01A-31R-A034-07
A0EV	BRCA	TCGA-A2-A0EV-01A-11R-A034-07
A0EX	BRCA	TCGA-A2-A0EX-01A-21R-A034-07
A0FD	BRCA	TCGA-AN-A0FD-01A-11R-A034-07
A0FF	BRCA	TCGA-AN-A0FF-01A-11R-A034-07
A0FK	BRCA	TCGA-AN-A0FK-01A-11R-A034-07
A0FL	BRCA	TCGA-AN-A0FL-01A-11R-A034-07
A0J3	BRCA	TCGA-AO-A0J3-01A-11R-A034-07
A0J5	BRCA	TCGA-AO-A0J5-01A-11R-A034-07
A0J8	BRCA	TCGA-AO-A0J8-01A-21R-A034-07
A0J9	BRCA	TCGA-AO-A0J9-01A-11R-A034-07
A0IM	BRCA	TCGA-B6-A0IM-01A-11R-A034-07
A0IN	BRCA	TCGA-B6-A0IN-01A-11R-A034-07
A0IO	BRCA	TCGA-B6-A0IO-01A-11R-A034-07
A0IP	BRCA	TCGA-B6-A0IP-01A-11R-A034-07
A0W4	BRCA	TCGA-BH-A0W4-01A-11R-A109-07
A0U4	BRCA	TCGA-AR-A0U4-01A-11R-A109-07
A0WY	BRCA	TCGA-B6-A0WY-01A-11R-A109-07
A0YF	BRCA	TCGA-A2-A0YF-01A-21R-A109-07
A0YT	BRCA	TCGA-A2-A0YT-01A-11R-A109-07
A0XS	BRCA	TCGA-AN-A0XS-01A-22R-A109-07
A0WZ	BRCA	TCGA-B6-A0WZ-01A-11R-A109-07
A129	BRCA	TCGA-AO-A129-01A-21R-A10J-07
A12E	BRCA	TCGA-AO-A12E-01A-11R-A10J-07
A12G	BRCA	TCGA-AO-A12G-01A-11R-A10J-07
A04H	BRCA	TCGA-AQ-A04H-01B-11R-A10J-07
A0X7	BRCA	TCGA-B6-A0X7-01A-11R-A10J-07
A04U	BRCA	TCGA-A2-A04U-01A-11R-A115-07
A04W	BRCA	TCGA-A2-A04W-01A-31R-A115-07
A0CS	BRCA	TCGA-A2-A0CS-01A-11R-A115-07
A0IH	BRCA	TCGA-B6-A0IH-01A-11R-A115-07
A0BP	BRCA	TCGA-BH-A0BP-01A-11R-A115-07
A0BQ	BRCA	TCGA-BH-A0BQ-01A-21R-A115-07
A0YC	BRCA	TCGA-A2-A0YC-01A-11R-A109-07
A0YD	BRCA	TCGA-A2-A0YD-01A-11R-A109-07
A0YL	BRCA	TCGA-A2-A0YL-01A-21R-A109-07
A0YM	BRCA	TCGA-A2-A0YM-01A-11R-A109-07
A0XO	BRCA	TCGA-AN-A0XO-01A-11R-A109-07
A0XP	BRCA	TCGA-AN-A0XP-01A-11R-A109-07
A0YI	BRCA	TCGA-A2-A0YI-01A-31R-A10J-07
A03M	BRCA	TCGA-AO-A03M-01B-11R-A10J-07
A03U	BRCA	TCGA-AO-A03U-01B-21R-A10J-07
A125	BRCA	TCGA-AO-A125-01A-11R-A10J-07
A126	BRCA	TCGA-AO-A126-01A-11R-A10J-07
A128	BRCA	TCGA-AO-A128-01A-11R-A10J-07
A0DX	BRCA	TCGA-BH-A0DX-01A-11R-A115-07
A0W7	BRCA	TCGA-BH-A0W7-01A-11R-A115-07
A105	BRCA	TCGA-E2-A105-01A-11R-A10J-07
A108	BRCA	TCGA-E2-A108-01A-13R-A10J-07
A10B	BRCA	TCGA-E2-A10B-01A-11R-A10J-07
A10E	BRCA	TCGA-E2-A10E-01A-21R-A10J-07
A10F	BRCA	TCGA-E2-A10F-01A-11R-A10J-07
A0DE	BRCA	TCGA-BH-A0DE-01A-11R-A115-07
A0EI	BRCA	TCGA-BH-A0EI-01A-11R-A115-07
A12N	BRCA	TCGA-C8-A12N-01A-11R-A115-07
A12O	BRCA	TCGA-C8-A12O-01A-11R-A115-07
A0XL	BRCA	TCGA-AN-A0XL-01A-11R-A10J-07
A12B	BRCA	TCGA-AO-A12B-01A-11R-A10J-07
A10C	BRCA	TCGA-E2-A10C-01A-21R-A10J-07
A0TY	BRCA	TCGA-AR-A0TY-01A-12R-A115-07
A04N	BRCA	TCGA-A2-A04N-01A-11R-A115-07
A0CL	BRCA	TCGA-A2-A0CL-01A-11R-A115-07
A03V	BRCA	TCGA-AO-A03V-01A-11R-A115-07
A15P	BRCA	TCGA-E2-A15P-01A-11R-A115-07
A15R	BRCA	TCGA-E2-A15R-01A-11R-A115-07
A0W3	BRCA	TCGA-BH-A0W3-01A-11R-A109-07
A12K	BRCA	TCGA-C8-A12K-01A-21R-A115-07
A12U	BRCA	TCGA-C8-A12U-01A-11R-A115-07
A132	BRCA	TCGA-C8-A132-01A-31R-A115-07
A134	BRCA	TCGA-C8-A134-01A-11R-A115-07
A141	BRCA	TCGA-D8-A141-01A-11R-A115-07
A142	BRCA	TCGA-D8-A142-01A-11R-A115-07
A14T	BRCA	TCGA-E2-A14T-01A-11R-A115-07
A0CV	BRCA	TCGA-A2-A0CV-01A-31R-A115-07
A0CW	BRCA	TCGA-A2-A0CW-01A-21R-A115-07
A0RH	BRCA	TCGA-B6-A0RH-01A-21R-A115-07
A0RQ	BRCA	TCGA-B6-A0RQ-01A-11R-A115-07
A0WS	BRCA	TCGA-B6-A0WS-01A-11R-A115-07
A0X0	BRCA	TCGA-B6-A0X0-01A-21R-A115-07
A0B0	BRCA	TCGA-BH-A0B0-01A-21R-A115-07
A0H5	BRCA	TCGA-BH-A0H5-01A-21R-A115-07
A12T	BRCA	TCGA-C8-A12T-01A-11R-A115-07
A131	BRCA	TCGA-C8-A131-01A-11R-A115-07
A140	BRCA	TCGA-D8-A140-01A-11R-A115-07
A14R	BRCA	TCGA-E2-A14R-01A-11R-A115-07
A15O	BRCA	TCGA-E2-A15O-01A-11R-A115-07
A12F	BRCA	TCGA-AO-A12F-01A-11R-A115-07
A0U1	BRCA	TCGA-AR-A0U1-01A-11R-A115-07
A0BG	BRCA	TCGA-BH-A0BG-01A-11R-A115-07
A0BL	BRCA	TCGA-BH-A0BL-01A-11R-A115-07
A0C7	BRCA	TCGA-BH-A0C7-01B-11R-A115-07
A0DL	BRCA	TCGA-BH-A0DL-01A-11R-A115-07
A0SD	BRCA	TCGA-A1-A0SD-01A-11R-A115-07
A0D3	BRCA	TCGA-A2-A0D3-01A-11R-A115-07
A0ES	BRCA	TCGA-A2-A0ES-01A-11R-A115-07
A0EW	BRCA	TCGA-A2-A0EW-01A-21R-A115-07
A0T3	BRCA	TCGA-A2-A0T3-01A-21R-A115-07
A0DA	BRCA	TCGA-A7-A0DA-01A-31R-A115-07
A12A	BRCA	TCGA-AO-A12A-01A-21R-A115-07
A0B7	BRCA	TCGA-BH-A0B7-01A-12R-A115-07
A12D	BRCA	TCGA-AO-A12D-01A-11R-A115-07
A0TS	BRCA	TCGA-AR-A0TS-01A-11R-A115-07
A12P	BRCA	TCGA-C8-A12P-01A-11R-A115-07
A13Z	BRCA	TCGA-D8-A13Z-01A-11R-A115-07
A14O	BRCA	TCGA-E2-A14O-01A-31R-A115-07
A1AH	BRCA	TCGA-AR-A1AH-01A-11R-A12D-07
A0BO	BRCA	TCGA-BH-A0BO-01A-23R-A12D-07
A18I	BRCA	TCGA-BH-A18I-01A-11R-A12D-07
A18J	BRCA	TCGA-BH-A18J-01A-11R-A12D-07
A18S	BRCA	TCGA-BH-A18S-01A-11R-A12D-07
A14Q	BRCA	TCGA-E2-A14Q-01A-11R-A12D-07
A14S	BRCA	TCGA-E2-A14S-01A-11R-A12D-07
A155	BRCA	TCGA-E2-A155-01A-11R-A12D-07
A13F	BRCA	TCGA-A7-A13F-01A-11R-A12P-07
A1AO	BRCA	TCGA-AR-A1AO-01A-11R-A12P-07
A1AQ	BRCA	TCGA-AR-A1AQ-01A-11R-A12P-07
A1AX	BRCA	TCGA-AR-A1AX-01A-11R-A12P-07
A0AU	BRCA	TCGA-BH-A0AU-01A-11R-A12P-07
A0BZ	BRCA	TCGA-BH-A0BZ-01A-31R-A12P-07
A0C3	BRCA	TCGA-BH-A0C3-01A-21R-A12P-07
A0DD	BRCA	TCGA-BH-A0DD-01A-31R-A12P-07
A15J	BRCA	TCGA-E2-A15J-01A-11R-A12P-07
A18F	BRCA	TCGA-BH-A18F-01A-11R-A12D-07
A18G	BRCA	TCGA-BH-A18G-01A-11R-A12D-07
A18H	BRCA	TCGA-BH-A18H-01A-11R-A12D-07
A18N	BRCA	TCGA-BH-A18N-01A-11R-A12D-07
A18P	BRCA	TCGA-BH-A18P-01A-11R-A12D-07
A18Q	BRCA	TCGA-BH-A18Q-01A-12R-A12D-07
A12Y	BRCA	TCGA-C8-A12Y-01A-11R-A12D-07
A133	BRCA	TCGA-C8-A133-01A-32R-A12D-07
A150	BRCA	TCGA-E2-A150-01A-11R-A12D-07
A153	BRCA	TCGA-E2-A153-01A-12R-A12D-07
A18L	BRCA	TCGA-BH-A18L-01A-32R-A12D-07
A18M	BRCA	TCGA-BH-A18M-01A-11R-A12D-07
A18T	BRCA	TCGA-BH-A18T-01A-11R-A12D-07
A18V	BRCA	TCGA-BH-A18V-01A-11R-A12D-07
A14V	BRCA	TCGA-E2-A14V-01A-11R-A12D-07
A14W	BRCA	TCGA-E2-A14W-01A-11R-A12D-07
A14Y	BRCA	TCGA-E2-A14Y-01A-21R-A12D-07
A158	BRCA	TCGA-E2-A158-01A-11R-A12D-07
A15A	BRCA	TCGA-E2-A15A-01A-11R-A12D-07
A15C	BRCA	TCGA-E2-A15C-01A-31R-A12D-07
A0AZ	BRCA	TCGA-BH-A0AZ-01A-21R-A12P-07
A0B5	BRCA	TCGA-BH-A0B5-01A-11R-A12P-07
A0BF	BRCA	TCGA-BH-A0BF-01A-21R-A12P-07
A0DI	BRCA	TCGA-BH-A0DI-01A-21R-A12P-07
A1AL	BRCA	TCGA-AR-A1AL-01A-21R-A12P-07
A1AN	BRCA	TCGA-AR-A1AN-01A-11R-A12P-07
A1AV	BRCA	TCGA-AR-A1AV-01A-21R-A12P-07
A0DV	BRCA	TCGA-BH-A0DV-01A-21R-A12P-07
A1B0	BRCA	TCGA-E2-A1B0-01A-11R-A12P-07
A1B1	BRCA	TCGA-E2-A1B1-01A-21R-A12P-07
A1B4	BRCA	TCGA-E2-A1B4-01A-11R-A12P-07
A04L	BRCA	TCGA-AQ-A04L-01B-21R-A10J-07
A1ET	BRCA	TCGA-BH-A1ET-01A-11R-A137-07
A1EU	BRCA	TCGA-BH-A1EU-01A-11R-A137-07
A1EV	BRCA	TCGA-BH-A1EV-01A-11R-A137-07
A1EW	BRCA	TCGA-BH-A1EW-01A-11R-A137-07
A14N	BRCA	TCGA-E2-A14N-01A-31R-A137-07
A15I	BRCA	TCGA-E2-A15I-01A-21R-A137-07
A0CP	BRCA	TCGA-A2-A0CP-01A-11R-A034-07
A07E	BRCA	TCGA-A8-A07E-01A-11R-A034-07
A0FZ	BRCA	TCGA-AN-A0FZ-01A-11R-A034-07
A03R	BRCA	TCGA-AO-A03R-01A-21R-A034-07
A0J7	BRCA	TCGA-AO-A0J7-01A-11R-A034-07
A15L	BRCA	TCGA-E2-A15L-01A-11R-A12D-07
A15M	BRCA	TCGA-E2-A15M-01A-11R-A12D-07
A1AW	BRCA	TCGA-AR-A1AW-01A-21R-A12P-07
A0BS	BRCA	TCGA-BH-A0BS-01A-11R-A12P-07
A0BT	BRCA	TCGA-BH-A0BT-01A-11R-A12P-07
A0H3	BRCA	TCGA-BH-A0H3-01A-11R-A12P-07
A0HA	BRCA	TCGA-BH-A0HA-01A-11R-A12P-07
A1F0	BRCA	TCGA-BH-A1F0-01A-11R-A137-07
A1HF	BRCA	TCGA-C8-A1HF-01A-11R-A137-07
A1HG	BRCA	TCGA-C8-A1HG-01A-11R-A137-07
A1HI	BRCA	TCGA-C8-A1HI-01A-11R-A137-07
A1HL	BRCA	TCGA-C8-A1HL-01A-11R-A137-07
A1HM	BRCA	TCGA-C8-A1HM-01A-12R-A137-07
A1HN	BRCA	TCGA-C8-A1HN-01A-11R-A137-07
A0E6	BRCA	TCGA-BH-A0E6-01A-11R-A034-07
A0H7	BRCA	TCGA-BH-A0H7-01A-13R-A056-07
A0CX	BRCA	TCGA-A2-A0CX-01A-21R-A00Z-07
A0CG	BRCA	TCGA-A7-A0CG-01A-12R-A056-07
A0CJ	BRCA	TCGA-A7-A0CJ-01A-21R-A00Z-07
A1B5	BRCA	TCGA-E2-A1B5-01A-21R-A12P-07
A04R	BRCA	TCGA-A2-A04R-01A-41R-A109-07
A0YH	BRCA	TCGA-A2-A0YH-01A-11R-A109-07
A0YJ	BRCA	TCGA-A2-A0YJ-01A-11R-A109-07
A0W5	BRCA	TCGA-BH-A0W5-01A-11R-A109-07
A0YK	BRCA	TCGA-A2-A0YK-01A-22R-A109-07
A0XN	BRCA	TCGA-AN-A0XN-01A-21R-A109-07
A0XT	BRCA	TCGA-AN-A0XT-01A-11R-A109-07
A0XU	BRCA	TCGA-AN-A0XU-01A-11R-A109-07
A0XV	BRCA	TCGA-AN-A0XV-01A-11R-A109-07
A0XW	BRCA	TCGA-AN-A0XW-01A-11R-A109-07
A0TU	BRCA	TCGA-AR-A0TU-01A-31R-A109-07
A0U0	BRCA	TCGA-AR-A0U0-01A-11R-A109-07
A0U2	BRCA	TCGA-AR-A0U2-01A-11R-A109-07
A0U3	BRCA	TCGA-AR-A0U3-01A-11R-A109-07
A0WT	BRCA	TCGA-B6-A0WT-01A-11R-A109-07
A0WV	BRCA	TCGA-B6-A0WV-01A-11R-A109-07
A0WW	BRCA	TCGA-B6-A0WW-01A-11R-A109-07
A0X1	BRCA	TCGA-B6-A0X1-01A-11R-A109-07
A0X4	BRCA	TCGA-B6-A0X4-01A-11R-A109-07
A0X5	BRCA	TCGA-B6-A0X5-01A-21R-A109-07
A12Z	BRCA	TCGA-C8-A12Z-01A-11R-A115-07
A159	BRCA	TCGA-E2-A159-01A-11R-A115-07
A138	BRCA	TCGA-C8-A138-01A-11R-A115-07
A10A	BRCA	TCGA-E2-A10A-01A-21R-A115-07
A13Y	BRCA	TCGA-D8-A13Y-01A-11R-A115-07
A147	BRCA	TCGA-D8-A147-01A-11R-A115-07
A146	BRCA	TCGA-D8-A146-01A-31R-A115-07
A12W	BRCA	TCGA-C8-A12W-01A-11R-A115-07
A0BR	BRCA	TCGA-BH-A0BR-01A-21R-A115-07
A12V	BRCA	TCGA-C8-A12V-01A-11R-A115-07
A0E9	BRCA	TCGA-BH-A0E9-01B-11R-A115-07
A12M	BRCA	TCGA-C8-A12M-01A-11R-A115-07
A1EO	BRCA	TCGA-BH-A1EO-01A-11R-A137-07
A1AR	BRCA	TCGA-AR-A1AR-01A-31R-A137-07
A135	BRCA	TCGA-C8-A135-01A-11R-A115-07
A137	BRCA	TCGA-C8-A137-01A-11R-A115-07
A143	BRCA	TCGA-D8-A143-01A-11R-A115-07
A145	BRCA	TCGA-D8-A145-01A-11R-A115-07
A14Z	BRCA	TCGA-E2-A14Z-01A-11R-A115-07
A154	BRCA	TCGA-E2-A154-01A-11R-A115-07
A15S	BRCA	TCGA-E2-A15S-01A-11R-A115-07
A15G	BRCA	TCGA-E2-A15G-01A-11R-A12D-07
A18K	BRCA	TCGA-BH-A18K-01A-11R-A12D-07
A0C1	BRCA	TCGA-BH-A0C1-01B-11R-A12D-07
A0DO	BRCA	TCGA-BH-A0DO-01B-11R-A12D-07
A06N	BRCA	TCGA-A8-A06N-01A-11R-A00Z-07
A06Z	BRCA	TCGA-A8-A06Z-01A-11R-A00Z-07
A07O	BRCA	TCGA-A8-A07O-01A-11R-A00Z-07
A085	BRCA	TCGA-A8-A085-01A-11R-A00Z-07
A08I	BRCA	TCGA-A8-A08I-01A-11R-A00Z-07
A091	BRCA	TCGA-A8-A091-01A-11R-A00Z-07
A095	BRCA	TCGA-A8-A095-01A-11R-A00Z-07
A09G	BRCA	TCGA-A8-A09G-01A-21R-A00Z-07
A06U	BRCA	TCGA-A8-A06U-01A-11R-A00Z-07
A084	BRCA	TCGA-A8-A084-01A-21R-A00Z-07
A09W	BRCA	TCGA-A8-A09W-01A-11R-A00Z-07
A0AJ	BRCA	TCGA-AN-A0AJ-01A-11R-A00Z-07
A0AS	BRCA	TCGA-AN-A0AS-01A-11R-A00Z-07
A03P	BRCA	TCGA-AO-A03P-01A-11R-A00Z-07
A09T	BRCA	TCGA-A8-A09T-01A-11R-A00Z-07
A1AI	BRCA	TCGA-AR-A1AI-01A-11R-A12P-07
A1AJ	BRCA	TCGA-AR-A1AJ-01A-21R-A12P-07
A1AK	BRCA	TCGA-AR-A1AK-01A-21R-A12P-07
A1AP	BRCA	TCGA-AR-A1AP-01A-11R-A12P-07
A1AS	BRCA	TCGA-AR-A1AS-01A-11R-A12P-07
A1AU	BRCA	TCGA-AR-A1AU-01A-11R-A12P-07
A0DZ	BRCA	TCGA-BH-A0DZ-01A-11R-A00Z-07
A12X	BRCA	TCGA-C8-A12X-01A-11R-A115-07
A1BC	BRCA	TCGA-E2-A1BC-01A-11R-A12P-07
A1AZ	BRCA	TCGA-E2-A1AZ-01A-11R-A12P-07
A06R	BRCA	TCGA-A8-A06R-01A-11R-A00Z-07
A083	BRCA	TCGA-A8-A083-01A-21R-A00Z-07
A08Z	BRCA	TCGA-A8-A08Z-01A-21R-A00Z-07
A096	BRCA	TCGA-A8-A096-01A-11R-A00Z-07
A099	BRCA	TCGA-A8-A099-01A-11R-A00Z-07
A09M	BRCA	TCGA-A8-A09M-01A-11R-A00Z-07
A03X	BRCA	TCGA-AN-A03X-01A-21R-A00Z-07
A03Y	BRCA	TCGA-AN-A03Y-01A-21R-A00Z-07
A0B4	BRCA	TCGA-BH-A0B4-01A-11R-A00Z-07
A1ES	BRCA	TCGA-BH-A1ES-01A-11R-A137-07
A1BD	BRCA	TCGA-E2-A1BD-01A-11R-A12P-07
A08G	BRCA	TCGA-A8-A08G-01A-11R-A00Z-07
A0HL	BRCA	TCGA-BH-A0HL-01A-11R-A10U-07
A0HN	BRCA	TCGA-BH-A0HN-01A-11R-A10U-07
A107	BRCA	TCGA-E2-A107-01A-11R-A10J-07
A09Z	BRCA	TCGA-A8-A09Z-01A-11R-A00Z-07
A15F	BRCA	TCGA-E2-A15F-01A-11R-A115-07
A15T	BRCA	TCGA-E2-A15T-01A-11R-A115-07
A1AT	BRCA	TCGA-AR-A1AT-01A-11R-A12P-07
A1B6	BRCA	TCGA-E2-A1B6-01A-31R-A12P-07
A07Z	BRCA	TCGA-A8-A07Z-01A-11R-A00Z-07
A09E	BRCA	TCGA-A8-A09E-01A-11R-A00Z-07
A0AR	BRCA	TCGA-AN-A0AR-01A-11R-A00Z-07
A08A	BRCA	TCGA-A8-A08A-01A-11R-A32Y-07
A0JB	BRCA	TCGA-AO-A0JB-01A-11R-A32Y-07
A0VK	CESC	TCGA-DS-A0VK-01A-21R-A10U-07
A0VM	CESC	TCGA-DS-A0VM-01A-11R-A10U-07
A0VL	CESC	TCGA-DS-A0VL-01A-21R-A10U-07
A0VN	CESC	TCGA-DS-A0VN-01A-21R-A10U-07
A0VR	CESC	TCGA-BI-A0VR-01A-11R-A10U-07
A0VS	CESC	TCGA-BI-A0VS-01A-11R-A10U-07
A0ZM	CESC	TCGA-DR-A0ZM-01A-12R-A10U-07
A0ZL	CESC	TCGA-DR-A0ZL-01A-11R-A10U-07
A1BJ	CESC	TCGA-C5-A1BJ-01A-11R-A13Y-07
A1ME	CESC	TCGA-C5-A1ME-01A-11R-A13Y-07
A1MF	CESC	TCGA-C5-A1MF-01A-11R-A13Y-07
A1BL	CESC	TCGA-C5-A1BL-01A-11R-A13Y-07
A1BM	CESC	TCGA-C5-A1BM-01A-11R-A13Y-07
A1M5	CESC	TCGA-C5-A1M5-01A-11R-A13Y-07
A1BI	CESC	TCGA-C5-A1BI-01B-11R-A13Y-07
A1M6	CESC	TCGA-C5-A1M6-01A-11R-A13Y-07
A1BK	CESC	TCGA-C5-A1BK-01B-11R-A13Y-07
A1BE	CESC	TCGA-C5-A1BE-01B-11R-A13Y-07
A1M7	CESC	TCGA-C5-A1M7-01A-11R-A13Y-07
A1M9	CESC	TCGA-C5-A1M9-01A-11R-A13Y-07
A1BF	CESC	TCGA-C5-A1BF-01B-11R-A13Y-07
A1H5	CESC	TCGA-EX-A1H5-01A-31R-A13Y-07
A1ML	CESC	TCGA-C5-A1ML-01A-11R-A14Y-07
A1MH	CESC	TCGA-C5-A1MH-01A-11R-A14Y-07
A20A	CESC	TCGA-BI-A20A-01A-11R-A14Y-07
A1MI	CESC	TCGA-C5-A1MI-01A-11R-A14Y-07
A1MJ	CESC	TCGA-C5-A1MJ-01A-11R-A14Y-07
A1OC	CESC	TCGA-DS-A1OC-01A-11R-A14Y-07
A1OD	CESC	TCGA-DS-A1OD-01A-11R-A14Y-07
A1MK	CESC	TCGA-C5-A1MK-01A-11R-A14Y-07
A0TN	CESC	TCGA-C5-A0TN-01A-21R-A14Y-07
A1MP	CESC	TCGA-C5-A1MP-01A-11R-A14Y-07
A1MN	CESC	TCGA-C5-A1MN-01A-11R-A14Y-07
A1OB	CESC	TCGA-DS-A1OB-01A-11R-A14Y-07
A1BN	CESC	TCGA-C5-A1BN-01B-11R-A14Y-07
A1QT	CESC	TCGA-EA-A1QT-01A-11R-A14Y-07
A1M8	CESC	TCGA-C5-A1M8-01A-21R-A13Y-07
A2RM	CESC	TCGA-EK-A2RM-01A-21R-A18M-07
A2PI	CESC	TCGA-EK-A2PI-01A-11R-A18M-07
A2R8	CESC	TCGA-EK-A2R8-01A-21R-A18M-07
A2M2	CESC	TCGA-C5-A2M2-01A-21R-A18M-07
A2PG	CESC	TCGA-EK-A2PG-01A-11R-A18M-07
A2PK	CESC	TCGA-EK-A2PK-01A-11R-A18M-07
A2RL	CESC	TCGA-EK-A2RL-01A-11R-A18M-07
A2LY	CESC	TCGA-C5-A2LY-01A-31R-A18M-07
A2RE	CESC	TCGA-EK-A2RE-01A-11R-A18M-07
A2PL	CESC	TCGA-EK-A2PL-01A-11R-A18M-07
A2PM	CESC	TCGA-EK-A2PM-01A-11R-A18M-07
A2LT	CESC	TCGA-C5-A2LT-01A-11R-A18M-07
A2RC	CESC	TCGA-EK-A2RC-01A-11R-A18M-07
A2R7	CESC	TCGA-EK-A2R7-01A-11R-A18M-07
A3HS	CESC	TCGA-EA-A3HS-01A-11R-A213-07
A3EO	CESC	TCGA-FU-A3EO-01A-11R-A213-07
A1BQ	CESC	TCGA-C5-A1BQ-01C-11R-A213-07
A3LK	CESC	TCGA-IR-A3LK-01A-12R-A213-07
A3HU	CESC	TCGA-EA-A3HU-01A-11R-A213-07
A2LZ	CESC	TCGA-C5-A2LZ-01A-11R-A213-07
A3LL	CESC	TCGA-IR-A3LL-01A-11R-A213-07
A3HD	CESC	TCGA-C5-A3HD-01B-11R-A213-07
A3HZ	CESC	TCGA-FU-A3HZ-01A-11R-A213-07
A2PA	CESC	TCGA-HG-A2PA-01A-11R-A213-07
A2RN	CESC	TCGA-EK-A2RN-01A-12R-A213-07
A3HF	CESC	TCGA-C5-A3HF-01A-11R-A213-07
A3GJ	CESC	TCGA-EK-A3GJ-01A-21R-A213-07
A3HL	CESC	TCGA-C5-A3HL-01A-11R-A213-07
A3L7	CESC	TCGA-IR-A3L7-01A-21R-A213-07
A3GK	CESC	TCGA-EK-A3GK-01A-11R-A213-07
A3LC	CESC	TCGA-IR-A3LC-01A-11R-A213-07
A3GM	CESC	TCGA-EK-A3GM-01A-11R-A213-07
A3HQ	CESC	TCGA-EA-A3HQ-01A-11R-A213-07
A3HR	CESC	TCGA-EA-A3HR-01A-11R-A213-07
A3LH	CESC	TCGA-IR-A3LH-01A-21R-A213-07
A3GN	CESC	TCGA-EK-A3GN-01A-11R-A213-07
A3Q8	CESC	TCGA-JX-A3Q8-01A-11R-A21T-07
A3NI	CESC	TCGA-FU-A3NI-01A-11R-A21T-07
A3HY	CESC	TCGA-FU-A3HY-01A-11R-A21T-07
A3JJ	CESC	TCGA-HM-A3JJ-01A-21R-A21T-07
A3LQ	CESC	TCGA-DS-A3LQ-01A-21R-A21T-07
A3HT	CESC	TCGA-EA-A3HT-01A-61R-A21T-07
A3QE	CESC	TCGA-EA-A3QE-01A-21R-A21T-07
A23K	CESC	TCGA-FU-A23K-01A-11R-A16R-07
A2KM	CESC	TCGA-DG-A2KM-01A-11R-A180-07
A2M1	CESC	TCGA-C5-A2M1-01A-11R-A18M-07
A2LV	CESC	TCGA-C5-A2LV-01A-11R-A18M-07
A2LX	CESC	TCGA-C5-A2LX-01A-11R-A18M-07
A2RB	CESC	TCGA-EK-A2RB-01A-11R-A18M-07
A2RA	CESC	TCGA-EK-A2RA-01A-11R-A18M-07
A2RJ	CESC	TCGA-EK-A2RJ-01A-11R-A18M-07
A2RO	CESC	TCGA-EK-A2RO-01A-11R-A18M-07
A2QG	CESC	TCGA-FU-A2QG-01A-11R-A18M-07
A2KL	CESC	TCGA-DG-A2KL-01A-11R-A180-07
A23L	CESC	TCGA-FU-A23L-01A-11R-A16R-07
A2H1	CESC	TCGA-EK-A2H1-01A-11R-A180-07
A2GZ	CESC	TCGA-EK-A2GZ-01A-11R-A180-07
A2H0	CESC	TCGA-EK-A2H0-01A-11R-A180-07
A2IP	CESC	TCGA-EK-A2IP-01A-11R-A180-07
A2RK	CESC	TCGA-EK-A2RK-01A-11R-A18M-07
A1QS	CESC	TCGA-EA-A1QS-01A-61R-A22U-07
A3WB	CESC	TCGA-FU-A3WB-01A-11R-A22U-07
A3HE	CESC	TCGA-C5-A3HE-01A-21R-A22U-07
A3TQ	CESC	TCGA-FU-A3TQ-01A-11R-A22U-07
A1H6	CESC	TCGA-EX-A1H6-01B-11R-A22U-07
A3LA	CESC	TCGA-IR-A3LA-01A-11R-A22U-07
A3LF	CESC	TCGA-IR-A3LF-01A-21R-A22U-07
A3YQ	CESC	TCGA-FU-A3YQ-01A-11R-A22U-07
A3QD	CESC	TCGA-EA-A3QD-01A-32R-A22U-07
A2LS	CESC	TCGA-C5-A2LS-01A-22R-A22U-07
A2KH	CESC	TCGA-DG-A2KH-01A-21R-A22U-07
A3TX	CESC	TCGA-FU-A3TX-01A-11R-A22U-07
A2R9	CESC	TCGA-EK-A2R9-01A-11R-A18M-07
A3Y4	CESC	TCGA-EA-A3Y4-01A-51R-A24H-07
A411	CESC	TCGA-EA-A411-01A-11R-A24H-07
A439	CESC	TCGA-EA-A439-01A-11R-A24H-07
A40J	CESC	TCGA-FU-A40J-01A-11R-A24H-07
A3LB	CESC	TCGA-IR-A3LB-01A-11R-A24H-07
A5RQ	CESC	TCGA-DS-A5RQ-01A-11R-A28H-07
A5FO	CESC	TCGA-EA-A5FO-01A-21R-A28H-07
A5O9	CESC	TCGA-EA-A5O9-01A-11R-A28H-07
A5ZD	CESC	TCGA-EA-A5ZD-01A-11R-A28H-07
A5ZE	CESC	TCGA-EA-A5ZE-01A-11R-A28H-07
A5ZF	CESC	TCGA-EA-A5ZF-01A-11R-A28H-07
A5XV	CESC	TCGA-FU-A5XV-01A-11R-A28H-07
A5VG	CESC	TCGA-JW-A5VG-01A-11R-A28H-07
A5VH	CESC	TCGA-JW-A5VH-01A-11R-A28H-07
A5VI	CESC	TCGA-JW-A5VI-01A-11R-A28H-07
A5VJ	CESC	TCGA-JW-A5VJ-01A-11R-A28H-07
A5VK	CESC	TCGA-JW-A5VK-01A-11R-A28H-07
A5VL	CESC	TCGA-JW-A5VL-01A-11R-A28H-07
A5QV	CESC	TCGA-JX-A5QV-01A-22R-A28H-07
A5U2	CESC	TCGA-LP-A5U2-01A-11R-A28H-07
A5U3	CESC	TCGA-LP-A5U3-01A-11R-A28H-07
A5R1	CESC	TCGA-Q1-A5R1-01A-11R-A28H-07
A5R2	CESC	TCGA-Q1-A5R2-01A-11R-A28H-07
A5R3	CESC	TCGA-Q1-A5R3-01A-11R-A28H-07
A44S	CESC	TCGA-EA-A44S-01A-12R-A26T-07
A4BA	CESC	TCGA-EA-A4BA-01A-21R-A26T-07
A50E	CESC	TCGA-EA-A50E-01A-21R-A26T-07
A556	CESC	TCGA-EA-A556-01A-11R-A26T-07
A57G	CESC	TCGA-FU-A57G-01A-11R-A26T-07
A4S6	CESC	TCGA-HM-A4S6-01A-11R-A26T-07
A51Y	CESC	TCGA-MU-A51Y-01A-11R-A26T-07
A5BD	CESC	TCGA-MY-A5BD-01A-11R-A26T-07
A5BE	CESC	TCGA-MY-A5BE-01A-21R-A26T-07
A5BF	CESC	TCGA-MY-A5BF-01A-11R-A26T-07
A2KK	CESC	TCGA-DG-A2KK-01A-11R-A180-07
A4AX	CESC	TCGA-LP-A4AX-01A-12R-A24H-07
A4AW	CESC	TCGA-LP-A4AW-01A-11R-A24H-07
A3Q0	CESC	TCGA-JX-A3Q0-01A-11R-A32Y-07
A3PZ	CESC	TCGA-JX-A3PZ-01A-11R-A32Y-07
A4AU	CESC	TCGA-LP-A4AU-01A-32R-A32Y-07
A4AV	CESC	TCGA-LP-A4AV-01A-11R-A32Y-07
A3L1	CESC	TCGA-EX-A3L1-01A-11R-A32Y-07
A3LI	CESC	TCGA-IR-A3LI-01A-11R-A32Y-07
A2KJ	CESC	TCGA-DG-A2KJ-01A-11R-A32Y-07
A410	CESC	TCGA-EA-A410-01A-11R-A32Y-07
A43B	CESC	TCGA-EA-A43B-01A-81R-A32Y-07
A3JK	CESC	TCGA-HM-A3JK-01A-11R-A32Y-07
A449	CESC	TCGA-EX-A449-01A-11R-A32Y-07
A7CG	CESC	TCGA-C5-A7CG-01A-11R-A32P-07
A7CJ	CESC	TCGA-C5-A7CJ-01A-11R-A32P-07
A7CK	CESC	TCGA-C5-A7CK-01A-11R-A32P-07
A7CL	CESC	TCGA-C5-A7CL-01A-11R-A32P-07
A78R	CESC	TCGA-EA-A78R-01A-11R-A32P-07
A69L	CESC	TCGA-EX-A69L-01A-11R-A32P-07
A69M	CESC	TCGA-EX-A69M-01A-11R-A32P-07
A69B	CESC	TCGA-JW-A69B-01A-11R-A32P-07
A5YI	CESC	TCGA-MU-A5YI-01A-11R-A32P-07
A6DT	CESC	TCGA-Q1-A6DT-01A-11R-A32P-07
A6DV	CESC	TCGA-Q1-A6DV-01A-11R-A32P-07
A6DW	CESC	TCGA-Q1-A6DW-01A-11R-A32P-07
A73O	CESC	TCGA-Q1-A73O-01A-11R-A32P-07
A73P	CESC	TCGA-Q1-A73P-01A-11R-A32P-07
A73Q	CESC	TCGA-Q1-A73Q-01A-21R-A32P-07
A69V	CESC	TCGA-R2-A69V-01A-11R-A32P-07
A7CH	CESC	TCGA-C5-A7CH-01A-11R-A33Z-07
A7CM	CESC	TCGA-C5-A7CM-01A-11R-A33Z-07
A7UE	CESC	TCGA-C5-A7UE-01A-11R-A33Z-07
A6QX	CESC	TCGA-EA-A6QX-01A-12R-A33Z-07
A770	CESC	TCGA-FU-A770-01A-11R-A33Z-07
A6W2	CESC	TCGA-HM-A6W2-01A-21R-A33Z-07
A7HU	CESC	TCGA-LP-A7HU-01A-11R-A33Z-07
A73R	CESC	TCGA-Q1-A73R-01A-11R-A33Z-07
A73S	CESC	TCGA-Q1-A73S-01A-11R-A33Z-07
A741	CESC	TCGA-RA-A741-01A-11R-A33Z-07
A7CO	CESC	TCGA-C5-A7CO-01A-11R-A352-07
A7UC	CESC	TCGA-C5-A7UC-01A-11R-A352-07
A7UH	CESC	TCGA-C5-A7UH-01A-11R-A352-07
A7X3	CESC	TCGA-C5-A7X3-01A-11R-A352-07
A7WF	CESC	TCGA-DS-A7WF-01A-11R-A352-07
A7WH	CESC	TCGA-DS-A7WH-01A-22R-A352-07
A7WI	CESC	TCGA-DS-A7WI-01A-12R-A352-07
A852	CESC	TCGA-JW-A852-01A-11R-A352-07
A7PD	CESC	TCGA-UC-A7PD-01A-11R-A352-07
A7PF	CESC	TCGA-UC-A7PF-01A-11R-A352-07
A834	CESC	TCGA-WL-A834-01A-11R-A352-07
A1MQ	CESC	TCGA-C5-A1MQ-01A-11R-A14Y-07
A1OA	CESC	TCGA-DS-A1OA-01A-11R-A14Y-07
A8Y8	CHOL	TCGA-ZH-A8Y8-01A-51R-A41I-07
AAVA	CHOL	TCGA-3X-AAVA-01A-11R-A41I-07
AAV9	CHOL	TCGA-3X-AAV9-01A-72R-A41I-07
AA2I	CHOL	TCGA-W5-AA2I-01A-32R-A41I-07
AA2O	CHOL	TCGA-W5-AA2O-01A-11R-A41I-07
AA2Z	CHOL	TCGA-W5-AA2Z-01A-11R-A41I-07
A8Y6	CHOL	TCGA-ZH-A8Y6-01A-11R-A41I-07
AA30	CHOL	TCGA-W5-AA30-01A-31R-A41I-07
AA0S	CHOL	TCGA-W6-AA0S-01A-11R-A41I-07
A7RX	CHOL	TCGA-WD-A7RX-01A-12R-A41I-07
AAVB	CHOL	TCGA-3X-AAVB-01A-31R-A41I-07
AAZO	CHOL	TCGA-4G-AAZO-01A-12R-A41I-07
AA2Q	CHOL	TCGA-W5-AA2Q-01A-11R-A41I-07
AA31	CHOL	TCGA-W5-AA31-01A-11R-A41I-07
A8Y2	CHOL	TCGA-ZH-A8Y2-01A-11R-A41I-07
AAVC	CHOL	TCGA-3X-AAVC-01A-21R-A41I-07
AA33	CHOL	TCGA-W5-AA33-01A-11R-A41I-07
AA2T	CHOL	TCGA-W5-AA2T-01A-12R-A41I-07
AAVE	CHOL	TCGA-3X-AAVE-01A-11R-A41I-07
AA34	CHOL	TCGA-W5-AA34-01A-11R-A41I-07
AAZT	CHOL	TCGA-4G-AAZT-01A-11R-A41I-07
AA2W	CHOL	TCGA-W5-AA2W-01A-11R-A41I-07
AA36	CHOL	TCGA-W5-AA36-01A-11R-A41I-07
A8I3	CHOL	TCGA-ZD-A8I3-01A-11R-A41I-07
A8S4	CHOL	TCGA-ZU-A8S4-01A-11R-A41I-07
A8Y1	CHOL	TCGA-ZH-A8Y1-01A-11R-A41I-07
A95A	CHOL	TCGA-YR-A95A-01A-12R-A41I-07
AA39	CHOL	TCGA-W5-AA39-01A-11R-A41I-07
AA2R	CHOL	TCGA-W5-AA2R-01A-11R-A41I-07
AA2G	CHOL	TCGA-W5-AA2G-01A-11R-A41I-07
AA2U	CHOL	TCGA-W5-AA2U-01A-11R-A41I-07
AA38	CHOL	TCGA-W5-AA38-01A-11R-A41I-07
A8Y4	CHOL	TCGA-ZH-A8Y4-01A-11R-A41I-07
AA2H	CHOL	TCGA-W5-AA2H-01A-31R-A41I-07
AA2X	CHOL	TCGA-W5-AA2X-01A-11R-A41I-07
A8Y5	CHOL	TCGA-ZH-A8Y5-01A-11R-A41I-07
4074	HNSC	TCGA-BA-4074-01A-01R-1436-07
4075	HNSC	TCGA-BA-4075-01A-01R-1436-07
4078	HNSC	TCGA-BA-4078-01A-01R-1436-07
5151	HNSC	TCGA-BA-5151-01A-01R-1436-07
5152	HNSC	TCGA-BA-5152-01A-02R-1873-07
5555	HNSC	TCGA-BA-5555-01A-01R-1514-07
5556	HNSC	TCGA-BA-5556-01A-01R-1514-07
5557	HNSC	TCGA-BA-5557-01A-01R-1514-07
5558	HNSC	TCGA-BA-5558-01A-01R-1514-07
5559	HNSC	TCGA-BA-5559-01A-01R-1514-07
6868	HNSC	TCGA-BA-6868-01B-12R-1915-07
6869	HNSC	TCGA-BA-6869-01A-11R-1873-07
6870	HNSC	TCGA-BA-6870-01A-11R-1873-07
6871	HNSC	TCGA-BA-6871-01A-11R-1873-07
6872	HNSC	TCGA-BA-6872-01A-11R-1873-07
6873	HNSC	TCGA-BA-6873-01A-11R-1873-07
7269	HNSC	TCGA-BA-7269-01A-11R-2016-07
4217	HNSC	TCGA-BB-4217-01A-11R-2081-07
4223	HNSC	TCGA-BB-4223-01A-01R-1436-07
4224	HNSC	TCGA-BB-4224-01A-01R-1436-07
4225	HNSC	TCGA-BB-4225-01A-01R-1436-07
4228	HNSC	TCGA-BB-4228-01A-01R-1436-07
4723	HNSC	TCGA-CN-4723-01A-01R-1436-07
4725	HNSC	TCGA-CN-4725-01A-01R-1436-07
4726	HNSC	TCGA-CN-4726-01A-01R-1436-07
4727	HNSC	TCGA-CN-4727-01A-01R-1436-07
4728	HNSC	TCGA-CN-4728-01A-01R-1436-07
4729	HNSC	TCGA-CN-4729-01A-01R-1436-07
4730	HNSC	TCGA-CN-4730-01A-01R-1436-07
4731	HNSC	TCGA-CN-4731-01A-01R-1436-07
4733	HNSC	TCGA-CN-4733-01A-02R-1873-07
4734	HNSC	TCGA-CN-4734-01A-01R-1436-07
4735	HNSC	TCGA-CN-4735-01A-01R-1436-07
4736	HNSC	TCGA-CN-4736-01A-01R-1436-07
4738	HNSC	TCGA-CN-4738-01A-02R-1514-07
4739	HNSC	TCGA-CN-4739-01A-02R-1514-07
4740	HNSC	TCGA-CN-4740-01A-01R-1436-07
4742	HNSC	TCGA-CN-4742-01A-02R-1514-07
5355	HNSC	TCGA-CN-5355-01A-01R-1436-07
5356	HNSC	TCGA-CN-5356-01A-01R-1436-07
5358	HNSC	TCGA-CN-5358-01A-01R-1514-07
5359	HNSC	TCGA-CN-5359-01A-01R-1436-07
5360	HNSC	TCGA-CN-5360-01A-01R-1436-07
5361	HNSC	TCGA-CN-5361-01A-01R-1436-07
5363	HNSC	TCGA-CN-5363-01A-01R-1436-07
5364	HNSC	TCGA-CN-5364-01A-01R-1436-07
5370	HNSC	TCGA-CN-5370-01A-01R-2016-07
5373	HNSC	TCGA-CN-5373-01A-01R-1436-07
6010	HNSC	TCGA-CN-6010-01A-11R-1686-07
6011	HNSC	TCGA-CN-6011-01A-11R-1686-07
6012	HNSC	TCGA-CN-6012-01A-11R-1686-07
6013	HNSC	TCGA-CN-6013-01A-11R-1686-07
6016	HNSC	TCGA-CN-6016-01A-11R-1686-07
6017	HNSC	TCGA-CN-6017-01A-11R-1686-07
6018	HNSC	TCGA-CN-6018-01A-11R-1686-07
6019	HNSC	TCGA-CN-6019-01A-11R-1686-07
6021	HNSC	TCGA-CN-6021-01A-11R-1686-07
6022	HNSC	TCGA-CN-6022-01A-21R-1686-07
6023	HNSC	TCGA-CN-6023-01A-11R-1686-07
6024	HNSC	TCGA-CN-6024-01A-11R-1686-07
6988	HNSC	TCGA-CN-6988-01A-11R-1915-07
6989	HNSC	TCGA-CN-6989-01A-11R-1915-07
6992	HNSC	TCGA-CN-6992-01A-11R-1915-07
6994	HNSC	TCGA-CN-6994-01A-11R-1915-07
6995	HNSC	TCGA-CN-6995-01A-31R-2016-07
6997	HNSC	TCGA-CN-6997-01A-11R-2016-07
6998	HNSC	TCGA-CN-6998-01A-23R-2016-07
5323	HNSC	TCGA-CQ-5323-01A-01R-1686-07
5324	HNSC	TCGA-CQ-5324-01A-01R-1686-07
5325	HNSC	TCGA-CQ-5325-01A-01R-1686-07
5326	HNSC	TCGA-CQ-5326-01A-01R-1873-07
5329	HNSC	TCGA-CQ-5329-01A-01R-1686-07
5330	HNSC	TCGA-CQ-5330-01A-01R-1686-07
5331	HNSC	TCGA-CQ-5331-01A-02R-1873-07
5332	HNSC	TCGA-CQ-5332-01A-01R-1686-07
5334	HNSC	TCGA-CQ-5334-01A-01R-1686-07
6220	HNSC	TCGA-CQ-6220-01A-11R-1915-07
6221	HNSC	TCGA-CQ-6221-01A-11R-2081-07
6222	HNSC	TCGA-CQ-6222-01A-11R-1915-07
6223	HNSC	TCGA-CQ-6223-01A-11R-1915-07
6224	HNSC	TCGA-CQ-6224-01A-11R-1915-07
7065	HNSC	TCGA-CQ-7065-01A-11R-2081-07
7068	HNSC	TCGA-CQ-7068-01A-11R-2081-07
5243	HNSC	TCGA-CR-5243-01A-01R-1514-07
5247	HNSC	TCGA-CR-5247-01A-01R-2016-07
5248	HNSC	TCGA-CR-5248-01A-01R-2016-07
6471	HNSC	TCGA-CR-6471-01A-11R-1873-07
6473	HNSC	TCGA-CR-6473-01A-11R-1873-07
6474	HNSC	TCGA-CR-6474-01A-11R-1873-07
6477	HNSC	TCGA-CR-6477-01A-11R-1873-07
6478	HNSC	TCGA-CR-6478-01A-11R-1873-07
6481	HNSC	TCGA-CR-6481-01A-11R-1873-07
6484	HNSC	TCGA-CR-6484-01A-11R-1873-07
6488	HNSC	TCGA-CR-6488-01A-12R-2081-07
6491	HNSC	TCGA-CR-6491-01A-11R-1873-07
6492	HNSC	TCGA-CR-6492-01A-12R-2081-07
6493	HNSC	TCGA-CR-6493-01A-11R-1873-07
7364	HNSC	TCGA-CR-7364-01A-11R-2016-07
7365	HNSC	TCGA-CR-7365-01A-11R-2016-07
7367	HNSC	TCGA-CR-7367-01A-11R-2016-07
7368	HNSC	TCGA-CR-7368-01A-11R-2132-07
7369	HNSC	TCGA-CR-7369-01A-11R-2132-07
7370	HNSC	TCGA-CR-7370-01A-11R-2132-07
7371	HNSC	TCGA-CR-7371-01A-11R-2016-07
7372	HNSC	TCGA-CR-7372-01A-11R-2016-07
7373	HNSC	TCGA-CR-7373-01A-11R-2016-07
7374	HNSC	TCGA-CR-7374-01A-11R-2016-07
7376	HNSC	TCGA-CR-7376-01A-11R-2132-07
7377	HNSC	TCGA-CR-7377-01A-11R-2016-07
7379	HNSC	TCGA-CR-7379-01A-11R-2016-07
7380	HNSC	TCGA-CR-7380-01A-11R-2016-07
7382	HNSC	TCGA-CR-7382-01A-11R-2132-07
7383	HNSC	TCGA-CR-7383-01A-11R-2132-07
7386	HNSC	TCGA-CR-7386-01A-11R-2016-07
7388	HNSC	TCGA-CR-7388-01A-11R-2016-07
7389	HNSC	TCGA-CR-7389-01A-11R-2016-07
7390	HNSC	TCGA-CR-7390-01A-11R-2016-07
7391	HNSC	TCGA-CR-7391-01A-11R-2016-07
7392	HNSC	TCGA-CR-7392-01A-11R-2016-07
7393	HNSC	TCGA-CR-7393-01A-11R-2016-07
7394	HNSC	TCGA-CR-7394-01A-11R-2016-07
7395	HNSC	TCGA-CR-7395-01A-11R-2016-07
7397	HNSC	TCGA-CR-7397-01A-11R-2016-07
7398	HNSC	TCGA-CR-7398-01A-11R-2016-07
7399	HNSC	TCGA-CR-7399-01A-11R-2016-07
7401	HNSC	TCGA-CR-7401-01A-11R-2016-07
7402	HNSC	TCGA-CR-7402-01A-11R-2016-07
5430	HNSC	TCGA-CV-5430-01A-02R-1686-07
5431	HNSC	TCGA-CV-5431-01A-01R-1514-07
5432	HNSC	TCGA-CV-5432-01A-02R-1686-07
5434	HNSC	TCGA-CV-5434-01A-01R-1686-07
5435	HNSC	TCGA-CV-5435-01A-01R-1686-07
5436	HNSC	TCGA-CV-5436-01A-01R-1514-07
5439	HNSC	TCGA-CV-5439-01A-01R-1686-07
5440	HNSC	TCGA-CV-5440-01A-01R-1514-07
5441	HNSC	TCGA-CV-5441-01A-01R-1514-07
5444	HNSC	TCGA-CV-5444-01A-02R-1514-07
5966	HNSC	TCGA-CV-5966-01A-11R-1686-07
5970	HNSC	TCGA-CV-5970-01A-11R-1686-07
5971	HNSC	TCGA-CV-5971-01A-11R-1686-07
5973	HNSC	TCGA-CV-5973-01A-11R-1686-07
5976	HNSC	TCGA-CV-5976-01A-11R-1686-07
5977	HNSC	TCGA-CV-5977-01A-11R-1686-07
5978	HNSC	TCGA-CV-5978-01A-11R-1686-07
5979	HNSC	TCGA-CV-5979-01A-11R-1686-07
6003	HNSC	TCGA-CV-6003-01A-11R-1686-07
6436	HNSC	TCGA-CV-6436-01A-11R-1686-07
6441	HNSC	TCGA-CV-6441-01A-11R-1686-07
6933	HNSC	TCGA-CV-6933-01A-11R-1915-07
6934	HNSC	TCGA-CV-6934-01A-11R-1915-07
6935	HNSC	TCGA-CV-6935-01A-11R-1915-07
6936	HNSC	TCGA-CV-6936-01A-11R-1915-07
6937	HNSC	TCGA-CV-6937-01A-11R-2016-07
6938	HNSC	TCGA-CV-6938-01A-11R-1915-07
6939	HNSC	TCGA-CV-6939-01A-11R-1915-07
6942	HNSC	TCGA-CV-6942-01A-21R-2016-07
6943	HNSC	TCGA-CV-6943-01A-11R-1915-07
6945	HNSC	TCGA-CV-6945-01A-11R-1915-07
6948	HNSC	TCGA-CV-6948-01A-11R-1915-07
6950	HNSC	TCGA-CV-6950-01A-11R-1915-07
6955	HNSC	TCGA-CV-6955-01A-11R-2016-07
6956	HNSC	TCGA-CV-6956-01A-21R-2016-07
6959	HNSC	TCGA-CV-6959-01A-11R-1915-07
6960	HNSC	TCGA-CV-6960-01A-41R-2016-07
6962	HNSC	TCGA-CV-6962-01A-11R-1915-07
7089	HNSC	TCGA-CV-7089-01A-11R-2016-07
7091	HNSC	TCGA-CV-7091-01A-11R-2016-07
7095	HNSC	TCGA-CV-7095-01A-21R-2016-07
7097	HNSC	TCGA-CV-7097-01A-11R-2016-07
7099	HNSC	TCGA-CV-7099-01A-41R-2016-07
7101	HNSC	TCGA-CV-7101-01A-11R-2016-07
7102	HNSC	TCGA-CV-7102-01A-11R-2016-07
7103	HNSC	TCGA-CV-7103-01A-21R-2016-07
7104	HNSC	TCGA-CV-7104-01A-11R-2016-07
7177	HNSC	TCGA-CV-7177-01A-11R-2016-07
7178	HNSC	TCGA-CV-7178-01A-21R-2016-07
7183	HNSC	TCGA-CV-7183-01A-11R-2016-07
7235	HNSC	TCGA-CV-7235-01A-11R-2016-07
7236	HNSC	TCGA-CV-7236-01A-11R-2016-07
7238	HNSC	TCGA-CV-7238-01A-11R-2016-07
7242	HNSC	TCGA-CV-7242-01A-11R-2016-07
7243	HNSC	TCGA-CV-7243-01A-11R-2016-07
7245	HNSC	TCGA-CV-7245-01A-11R-2016-07
7247	HNSC	TCGA-CV-7247-01A-11R-2016-07
7248	HNSC	TCGA-CV-7248-01A-11R-2016-07
7250	HNSC	TCGA-CV-7250-01A-11R-2016-07
7252	HNSC	TCGA-CV-7252-01A-11R-2016-07
7253	HNSC	TCGA-CV-7253-01A-11R-2016-07
7254	HNSC	TCGA-CV-7254-01A-11R-2016-07
7261	HNSC	TCGA-CV-7261-01A-11R-2016-07
7263	HNSC	TCGA-CV-7263-01A-11R-2016-07
7406	HNSC	TCGA-CV-7406-01A-11R-2081-07
7407	HNSC	TCGA-CV-7407-01A-11R-2081-07
7410	HNSC	TCGA-CV-7410-01A-21R-2081-07
7411	HNSC	TCGA-CV-7411-01A-11R-2081-07
7413	HNSC	TCGA-CV-7413-01A-11R-2081-07
7414	HNSC	TCGA-CV-7414-01A-11R-2081-07
7415	HNSC	TCGA-CV-7415-01A-11R-2081-07
7418	HNSC	TCGA-CV-7418-01A-11R-2081-07
7421	HNSC	TCGA-CV-7421-01A-11R-2081-07
7422	HNSC	TCGA-CV-7422-01A-21R-2081-07
7423	HNSC	TCGA-CV-7423-01A-11R-2081-07
7424	HNSC	TCGA-CV-7424-01A-11R-2081-07
7427	HNSC	TCGA-CV-7427-01A-11R-2081-07
7429	HNSC	TCGA-CV-7429-01A-11R-2132-07
7430	HNSC	TCGA-CV-7430-01A-11R-2132-07
7432	HNSC	TCGA-CV-7432-01A-11R-2132-07
7433	HNSC	TCGA-CV-7433-01A-11R-2132-07
7434	HNSC	TCGA-CV-7434-01A-11R-2132-07
7435	HNSC	TCGA-CV-7435-01A-11R-2132-07
7437	HNSC	TCGA-CV-7437-01A-21R-2132-07
7438	HNSC	TCGA-CV-7438-01A-21R-2132-07
7440	HNSC	TCGA-CV-7440-01A-11R-2132-07
7082	HNSC	TCGA-CX-7082-01A-11R-2016-07
7085	HNSC	TCGA-CX-7085-01A-21R-2016-07
7086	HNSC	TCGA-CX-7086-01A-11R-2081-07
7219	HNSC	TCGA-CX-7219-01A-11R-2016-07
6515	HNSC	TCGA-D6-6515-01A-21R-1873-07
6516	HNSC	TCGA-D6-6516-01A-11R-1873-07
6517	HNSC	TCGA-D6-6517-01A-11R-1873-07
6823	HNSC	TCGA-D6-6823-01A-11R-1915-07
5624	HNSC	TCGA-DQ-5624-01A-01R-1873-07
5625	HNSC	TCGA-DQ-5625-01A-01R-1873-07
5629	HNSC	TCGA-DQ-5629-01A-01R-1873-07
5630	HNSC	TCGA-DQ-5630-01A-01R-1873-07
5631	HNSC	TCGA-DQ-5631-01A-01R-1873-07
7588	HNSC	TCGA-DQ-7588-01A-11R-2081-07
7591	HNSC	TCGA-DQ-7591-01A-11R-2081-07
7592	HNSC	TCGA-DQ-7592-01A-11R-2081-07
7848	HNSC	TCGA-F7-7848-01A-11R-2132-07
7774	HNSC	TCGA-H7-7774-01A-21R-2081-07
7229	HNSC	TCGA-HD-7229-01A-11R-2016-07
7753	HNSC	TCGA-HD-7753-01A-11R-2081-07
7754	HNSC	TCGA-HD-7754-01A-11R-2081-07
7831	HNSC	TCGA-HD-7831-01A-11R-2132-07
7832	HNSC	TCGA-HD-7832-01A-11R-2132-07
7630	HNSC	TCGA-IQ-7630-01A-11R-2081-07
7631	HNSC	TCGA-IQ-7631-01A-11R-2081-07
7632	HNSC	TCGA-IQ-7632-01A-11R-2081-07
5366	HNSC	TCGA-CN-5366-01A-01R-1436-07
5367	HNSC	TCGA-CN-5367-01A-01R-1436-07
5369	HNSC	TCGA-CN-5369-01A-01R-1436-07
6940	HNSC	TCGA-CV-6940-01A-11R-1915-07
6941	HNSC	TCGA-CV-6941-01A-11R-1915-07
6951	HNSC	TCGA-CV-6951-01A-11R-1915-07
6952	HNSC	TCGA-CV-6952-01A-11R-1915-07
6953	HNSC	TCGA-CV-6953-01A-11R-1915-07
6954	HNSC	TCGA-CV-6954-01A-11R-1915-07
6824	HNSC	TCGA-D6-6824-01A-11R-1915-07
6825	HNSC	TCGA-D6-6825-01A-21R-1915-07
6826	HNSC	TCGA-D6-6826-01A-11R-1915-07
6020	HNSC	TCGA-CN-6020-01A-11R-1686-07
6225	HNSC	TCGA-CQ-6225-01A-11R-1915-07
6227	HNSC	TCGA-CQ-6227-01A-11R-1915-07
6218	HNSC	TCGA-CQ-6218-01A-11R-1915-07
6228	HNSC	TCGA-CQ-6228-01A-11R-1915-07
6219	HNSC	TCGA-CQ-6219-01A-11R-1915-07
6229	HNSC	TCGA-CQ-6229-01A-11R-1915-07
5149	HNSC	TCGA-BA-5149-01A-01R-1514-07
7861	HNSC	TCGA-BB-7861-01A-11R-2232-07
7862	HNSC	TCGA-BB-7862-01A-21R-2232-07
7863	HNSC	TCGA-BB-7863-01A-11R-2232-07
7864	HNSC	TCGA-BB-7864-01A-11R-2232-07
7870	HNSC	TCGA-BB-7870-01A-11R-2232-07
7871	HNSC	TCGA-BB-7871-01A-11R-2232-07
7872	HNSC	TCGA-BB-7872-01A-11R-2232-07
7067	HNSC	TCGA-CQ-7067-01A-11R-2232-07
7409	HNSC	TCGA-CV-7409-01A-31R-2232-07
7589	HNSC	TCGA-DQ-7589-01A-11R-2232-07
7590	HNSC	TCGA-DQ-7590-01A-11R-2232-07
7593	HNSC	TCGA-DQ-7593-01A-11R-2232-07
7594	HNSC	TCGA-DQ-7594-01A-11R-2232-07
7595	HNSC	TCGA-DQ-7595-01A-11R-2232-07
7596	HNSC	TCGA-DQ-7596-01A-11R-2232-07
7917	HNSC	TCGA-HD-7917-01A-11R-2232-07
A4IF	HNSC	TCGA-BA-A4IF-01A-11R-A266-07
A4IG	HNSC	TCGA-BA-A4IG-01A-11R-A266-07
A4II	HNSC	TCGA-BA-A4II-01A-11R-A266-07
A5HU	HNSC	TCGA-BB-A5HU-01A-11R-A28V-07
A5HY	HNSC	TCGA-BB-A5HY-01A-11R-A28V-07
A5HZ	HNSC	TCGA-BB-A5HZ-01A-21R-A28V-07
A480	HNSC	TCGA-C9-A480-01A-12R-A24H-07
A497	HNSC	TCGA-CN-A497-01A-11R-A24H-07
A498	HNSC	TCGA-CN-A498-01A-11R-A24H-07
A63T	HNSC	TCGA-CN-A63T-01A-11R-A28V-07
A4C6	HNSC	TCGA-CQ-A4C6-01A-11R-A24Z-07
A4C7	HNSC	TCGA-CQ-A4C7-01A-11R-A24Z-07
A4C9	HNSC	TCGA-CQ-A4C9-01A-11R-A24Z-07
A4CA	HNSC	TCGA-CQ-A4CA-01A-11R-A24Z-07
A4CB	HNSC	TCGA-CQ-A4CB-01A-11R-A24Z-07
A4CD	HNSC	TCGA-CQ-A4CD-01A-21R-A24Z-07
A4CG	HNSC	TCGA-CQ-A4CG-01A-11R-A266-07
A4CH	HNSC	TCGA-CQ-A4CH-01A-11R-A266-07
A4CI	HNSC	TCGA-CQ-A4CI-01A-11R-A266-07
A45V	HNSC	TCGA-CV-A45V-01A-21R-A24Z-07
A45W	HNSC	TCGA-CV-A45W-01A-11R-A24Z-07
A45X	HNSC	TCGA-CV-A45X-01A-21R-A24Z-07
A45Y	HNSC	TCGA-CV-A45Y-01A-11R-A24Z-07
A45Z	HNSC	TCGA-CV-A45Z-01A-21R-A24Z-07
A460	HNSC	TCGA-CV-A460-01A-21R-A24Z-07
A461	HNSC	TCGA-CV-A461-01A-41R-A266-07
A464	HNSC	TCGA-CV-A464-01A-11R-A266-07
A468	HNSC	TCGA-CV-A468-01A-11R-A266-07
A4AQ	HNSC	TCGA-CX-A4AQ-01A-11R-A24Z-07
A4Z9	HNSC	TCGA-D6-A4Z9-01A-11R-A24Z-07
A4ZB	HNSC	TCGA-D6-A4ZB-01A-11R-A24Z-07
A50I	HNSC	TCGA-F7-A50I-01A-11R-A28V-07
A50J	HNSC	TCGA-F7-A50J-01A-21R-A28V-07
A61S	HNSC	TCGA-F7-A61S-01A-11R-A28V-07
A61V	HNSC	TCGA-F7-A61V-01A-11R-A28V-07
A61W	HNSC	TCGA-F7-A61W-01A-11R-A28V-07
A620	HNSC	TCGA-F7-A620-01A-11R-A28V-07
A622	HNSC	TCGA-F7-A622-01A-11R-A28V-07
A623	HNSC	TCGA-F7-A623-01A-11R-A28V-07
A633	HNSC	TCGA-HD-A633-01A-11R-A28V-07
A634	HNSC	TCGA-HD-A634-01A-11R-A28V-07
A51W	HNSC	TCGA-MT-A51W-01A-21R-A266-07
A51X	HNSC	TCGA-MT-A51X-01A-11R-A266-07
A5Q6	HNSC	TCGA-P3-A5Q6-01A-11R-A28V-07
A5QA	HNSC	TCGA-P3-A5QA-01A-11R-A28V-07
A5QE	HNSC	TCGA-P3-A5QE-01A-11R-A28V-07
A5QF	HNSC	TCGA-P3-A5QF-01A-11R-A28V-07
8596	HNSC	TCGA-BB-8596-01A-11R-2403-07
8601	HNSC	TCGA-BB-8601-01A-11R-2403-07
A47Z	HNSC	TCGA-C9-A47Z-01A-11R-A24H-07
A499	HNSC	TCGA-CN-A499-01A-11R-A24H-07
A49A	HNSC	TCGA-CN-A49A-01A-11R-A24H-07
A49B	HNSC	TCGA-CN-A49B-01A-31R-A24H-07
A49C	HNSC	TCGA-CN-A49C-01A-11R-A24H-07
5333	HNSC	TCGA-CQ-5333-01A-01R-2403-07
7063	HNSC	TCGA-CQ-7063-01A-11R-2403-07
7069	HNSC	TCGA-CQ-7069-01A-11R-2403-07
A4CE	HNSC	TCGA-CQ-A4CE-01A-11R-A266-07
A45O	HNSC	TCGA-CV-A45O-01A-21R-A24H-07
A45P	HNSC	TCGA-CV-A45P-01A-11R-A24H-07
A45Q	HNSC	TCGA-CV-A45Q-01A-11R-A24H-07
A45R	HNSC	TCGA-CV-A45R-01A-11R-A24H-07
A45T	HNSC	TCGA-CV-A45T-01A-11R-A24H-07
A45U	HNSC	TCGA-CV-A45U-01A-12R-A24H-07
A463	HNSC	TCGA-CV-A463-01A-11R-A266-07
A465	HNSC	TCGA-CV-A465-01A-11R-A266-07
8568	HNSC	TCGA-D6-8568-01A-11R-2403-07
8569	HNSC	TCGA-D6-8569-01A-11R-2403-07
8298	HNSC	TCGA-F7-8298-01A-11R-2403-07
8489	HNSC	TCGA-F7-8489-01A-31R-2403-07
A50G	HNSC	TCGA-F7-A50G-01A-11R-A266-07
8501	HNSC	TCGA-H7-8501-01A-11R-2403-07
8502	HNSC	TCGA-H7-8502-01A-11R-2403-07
8224	HNSC	TCGA-HD-8224-01A-11R-2403-07
8314	HNSC	TCGA-HD-8314-01A-11R-2403-07
8634	HNSC	TCGA-HD-8634-01A-11R-2403-07
8635	HNSC	TCGA-HD-8635-01A-11R-2403-07
A4C1	HNSC	TCGA-HD-A4C1-01A-11R-A24H-07
A6DA	HNSC	TCGA-BA-A6DA-01A-31R-A31N-07
A6DB	HNSC	TCGA-BA-A6DB-01A-11R-A30B-07
A6DD	HNSC	TCGA-BA-A6DD-01A-12R-A31N-07
A6DE	HNSC	TCGA-BA-A6DE-01A-22R-A31N-07
A6DG	HNSC	TCGA-BA-A6DG-01A-21R-A30B-07
A6DI	HNSC	TCGA-BA-A6DI-01A-11R-A30B-07
A6DJ	HNSC	TCGA-BA-A6DJ-01A-11R-A30B-07
A641	HNSC	TCGA-CN-A641-01A-11R-A30B-07
A642	HNSC	TCGA-CN-A642-01A-12R-A30B-07
A6JD	HNSC	TCGA-CV-A6JD-01A-11R-A31N-07
A6JE	HNSC	TCGA-CV-A6JE-01A-11R-A31N-07
A6JM	HNSC	TCGA-CV-A6JM-01A-11R-A31N-07
A6JN	HNSC	TCGA-CV-A6JN-01A-11R-A31N-07
A6JT	HNSC	TCGA-CV-A6JT-01A-11R-A31N-07
A6JU	HNSC	TCGA-CV-A6JU-01A-11R-A31N-07
A6JY	HNSC	TCGA-CV-A6JY-01A-11R-A31N-07
A6JZ	HNSC	TCGA-CV-A6JZ-01A-11R-A31N-07
A6K1	HNSC	TCGA-CV-A6K1-01A-11R-A31N-07
A6EO	HNSC	TCGA-D6-A6EO-01A-11R-A31N-07
A6EP	HNSC	TCGA-D6-A6EP-01A-11R-A31N-07
A6ES	HNSC	TCGA-D6-A6ES-01A-12R-A31N-07
A61E	HNSC	TCGA-IQ-A61E-01A-22R-A30B-07
A61O	HNSC	TCGA-IQ-A61O-01A-11R-A30B-07
A66S	HNSC	TCGA-KU-A66S-01A-21R-A30B-07
A6H7	HNSC	TCGA-KU-A6H7-01A-11R-A31N-07
A6I9	HNSC	TCGA-MZ-A6I9-01A-11R-A31N-07
A64Z	HNSC	TCGA-QK-A64Z-01A-11R-A30B-07
A652	HNSC	TCGA-QK-A652-01A-11R-A30B-07
A6IH	HNSC	TCGA-QK-A6IH-01A-11R-A31N-07
A6II	HNSC	TCGA-QK-A6II-01A-11R-A31N-07
A6IJ	HNSC	TCGA-QK-A6IJ-01A-11R-A31N-07
6996	HNSC	TCGA-CN-6996-01A-11R-1915-07
7425	HNSC	TCGA-CV-7425-01A-11R-2081-07
A6D8	HNSC	TCGA-BA-A6D8-01A-31R-A31N-07
5327	HNSC	TCGA-CQ-5327-01A-01R-1686-07
6827	HNSC	TCGA-D6-6827-01A-11R-1915-07
A6EK	HNSC	TCGA-D6-A6EK-01A-11R-A31N-07
A6EM	HNSC	TCGA-D6-A6EM-01A-21R-A31N-07
A6EN	HNSC	TCGA-D6-A6EN-01A-11R-A31N-07
A6I0	HNSC	TCGA-HD-A6I0-01A-11R-A31N-07
7533	HNSC	TCGA-HL-7533-01A-11R-2232-07
A6DL	HNSC	TCGA-BA-A6DL-01A-21R-A30B-07
A63U	HNSC	TCGA-CN-A63U-01A-11R-A30B-07
A63W	HNSC	TCGA-CN-A63W-01A-11R-A30B-07
7071	HNSC	TCGA-CQ-7071-01A-12R-A30B-07
7072	HNSC	TCGA-CQ-7072-01A-21R-A30B-07
A624	HNSC	TCGA-F7-A624-01A-22R-A30B-07
A6C4	HNSC	TCGA-H7-A6C4-01A-11R-A30B-07
A61G	HNSC	TCGA-IQ-A61G-01A-11R-A30B-07
A61H	HNSC	TCGA-IQ-A61H-01A-11R-A30B-07
A61I	HNSC	TCGA-IQ-A61I-01A-11R-A30B-07
A61J	HNSC	TCGA-IQ-A61J-01A-11R-A30B-07
A66T	HNSC	TCGA-KU-A66T-01A-11R-A30B-07
A67A	HNSC	TCGA-MT-A67A-01A-11R-A30B-07
A67D	HNSC	TCGA-MT-A67D-01A-31R-A30B-07
A67F	HNSC	TCGA-MT-A67F-01A-11R-A30B-07
A6UM	HNSC	TCGA-BB-A6UM-01A-12R-A34R-07
A6UO	HNSC	TCGA-BB-A6UO-01A-12R-A34R-07
A6UY	HNSC	TCGA-CN-A6UY-01A-12R-A34R-07
A6V1	HNSC	TCGA-CN-A6V1-01A-12R-A34R-07
A6V3	HNSC	TCGA-CN-A6V3-01A-12R-A34R-07
A6V6	HNSC	TCGA-CN-A6V6-01A-12R-A34R-07
A6V7	HNSC	TCGA-CN-A6V7-01A-12R-A34R-07
A6JO	HNSC	TCGA-CV-A6JO-01B-11R-A34R-07
A74Q	HNSC	TCGA-D6-A74Q-01A-11R-A34R-07
A76A	HNSC	TCGA-H7-A76A-01A-51R-A34R-07
A6SG	HNSC	TCGA-IQ-A6SG-01A-12R-A34R-07
A6SH	HNSC	TCGA-IQ-A6SH-01A-12R-A34R-07
A7BN	HNSC	TCGA-MT-A7BN-01A-12R-A34R-07
A5BI	HNSC	TCGA-MZ-A5BI-01A-31R-A34R-07
A7D7	HNSC	TCGA-MZ-A7D7-01A-21R-A34R-07
A6SW	HNSC	TCGA-P3-A6SW-01A-11R-A34R-07
A6SX	HNSC	TCGA-P3-A6SX-01A-11R-A34R-07
A6T0	HNSC	TCGA-P3-A6T0-01A-12R-A34R-07
A6T2	HNSC	TCGA-P3-A6T2-01A-11R-A34R-07
A6T3	HNSC	TCGA-P3-A6T3-01A-11R-A34R-07
A6T4	HNSC	TCGA-P3-A6T4-01A-11R-A34R-07
A6T5	HNSC	TCGA-P3-A6T5-01A-11R-A34R-07
A6T6	HNSC	TCGA-P3-A6T6-01A-11R-A34R-07
A6T7	HNSC	TCGA-P3-A6T7-01A-11R-A34R-07
A6T8	HNSC	TCGA-P3-A6T8-01A-11R-A34R-07
A6V9	HNSC	TCGA-QK-A6V9-01A-11R-A34R-07
A6VB	HNSC	TCGA-QK-A6VB-01A-12R-A34R-07
A6VC	HNSC	TCGA-QK-A6VC-01A-23R-A34R-07
A6TO	HNSC	TCGA-RS-A6TO-01A-32R-A34R-07
A6TP	HNSC	TCGA-RS-A6TP-01A-12R-A34R-07
A6WX	HNSC	TCGA-T2-A6WX-01A-12R-A34R-07
A6WZ	HNSC	TCGA-T2-A6WZ-01A-21R-A34R-07
A6X0	HNSC	TCGA-T2-A6X0-01A-11R-A34R-07
A6X2	HNSC	TCGA-T2-A6X2-01A-12R-A34R-07
A7HI	HNSC	TCGA-TN-A7HI-01A-11R-A34R-07
A7HJ	HNSC	TCGA-TN-A7HJ-01A-12R-A34R-07
A7HL	HNSC	TCGA-TN-A7HL-01A-11R-A34R-07
A718	HNSC	TCGA-UF-A718-01A-22R-A34R-07
A719	HNSC	TCGA-UF-A719-01A-12R-A34R-07
A71A	HNSC	TCGA-UF-A71A-01A-22R-A34R-07
A71B	HNSC	TCGA-UF-A71B-01A-12R-A34R-07
A71D	HNSC	TCGA-UF-A71D-01A-12R-A34R-07
A71E	HNSC	TCGA-UF-A71E-01A-31R-A34R-07
A7J9	HNSC	TCGA-UF-A7J9-01A-12R-A34R-07
A7JA	HNSC	TCGA-UF-A7JA-01A-12R-A34R-07
A7JC	HNSC	TCGA-UF-A7JC-01A-21R-A34R-07
A7JD	HNSC	TCGA-UF-A7JD-01A-11R-A34R-07
A7JF	HNSC	TCGA-UF-A7JF-01A-11R-A34R-07
A7JJ	HNSC	TCGA-UF-A7JJ-01A-11R-A34R-07
A7JK	HNSC	TCGA-UF-A7JK-01A-11R-A34R-07
A7JO	HNSC	TCGA-UF-A7JO-01A-11R-A34R-07
A7JS	HNSC	TCGA-UF-A7JS-01A-11R-A34R-07
A7JT	HNSC	TCGA-UF-A7JT-01A-11R-A34R-07
A7JV	HNSC	TCGA-UF-A7JV-01A-11R-A34R-07
A6WW	HNSC	TCGA-UP-A6WW-01A-12R-A34R-07
A7GZ	HNSC	TCGA-WA-A7GZ-01A-11R-A34R-07
A7H4	HNSC	TCGA-WA-A7H4-01A-21R-A34R-07
A6H8	HNSC	TCGA-KU-A6H8-01A-21R-A34R-07
7446	HNSC	TCGA-CV-7446-01A-11R-2232-07
7568	HNSC	TCGA-CV-7568-01A-11R-2232-07
A7JH	HNSC	TCGA-UF-A7JH-01A-21R-A34R-07
A6K0	HNSC	TCGA-CV-A6K0-01B-21R-A31N-07
A6EQ	HNSC	TCGA-D6-A6EQ-01A-11R-A31N-07
A6HZ	HNSC	TCGA-HD-A6HZ-01A-12R-A31N-07
4227	HNSC	TCGA-BB-4227-01A-01R-1873-07
A6K2	HNSC	TCGA-CV-A6K2-01A-11R-A31N-07
A6IF	HNSC	TCGA-QK-A6IF-01A-11R-A31N-07
A6IG	HNSC	TCGA-QK-A6IG-01A-11R-A31N-07
A63V	HNSC	TCGA-CN-A63V-01A-11R-A466-07
8324	KICH	TCGA-KL-8324-01A-11R-2315-07
8331	KICH	TCGA-KL-8331-01A-11R-2315-07
8339	KICH	TCGA-KL-8339-01A-11R-2315-07
8332	KICH	TCGA-KL-8332-01A-11R-2315-07
8340	KICH	TCGA-KL-8340-01A-11R-2315-07
8438	KICH	TCGA-KM-8438-01A-11R-2315-07
8439	KICH	TCGA-KM-8439-01A-11R-2315-07
8419	KICH	TCGA-KN-8419-01A-11R-2315-07
8327	KICH	TCGA-KL-8327-01A-11R-2315-07
8334	KICH	TCGA-KL-8334-01A-11R-2315-07
8333	KICH	TCGA-KL-8333-01A-11R-2315-07
8441	KICH	TCGA-KM-8441-01A-11R-2315-07
8421	KICH	TCGA-KN-8421-01A-11R-2315-07
8422	KICH	TCGA-KN-8422-01A-11R-2315-07
8430	KICH	TCGA-KN-8430-01A-11R-2315-07
8428	KICH	TCGA-KN-8428-01A-11R-2315-07
8436	KICH	TCGA-KN-8436-01A-11R-2315-07
8408	KICH	TCGA-KO-8408-01A-11R-2315-07
8409	KICH	TCGA-KO-8409-01A-11R-2315-07
8427	KICH	TCGA-KN-8427-01A-11R-2315-07
8326	KICH	TCGA-KL-8326-01A-11R-2315-07
8403	KICH	TCGA-KO-8403-01A-11R-2315-07
8437	KICH	TCGA-KN-8437-01A-11R-2315-07
8410	KICH	TCGA-KO-8410-01A-11R-2315-07
8328	KICH	TCGA-KL-8328-01A-11R-2315-07
8329	KICH	TCGA-KL-8329-01A-11R-2315-07
8330	KICH	TCGA-KL-8330-01A-11R-2315-07
8335	KICH	TCGA-KL-8335-01A-11R-2315-07
8336	KICH	TCGA-KL-8336-01A-11R-2315-07
8337	KICH	TCGA-KL-8337-01A-11R-2315-07
8338	KICH	TCGA-KL-8338-01A-11R-2315-07
8344	KICH	TCGA-KL-8344-01A-11R-2315-07
8343	KICH	TCGA-KL-8343-01A-11R-2315-07
8345	KICH	TCGA-KL-8345-01A-11R-2315-07
8346	KICH	TCGA-KL-8346-01A-11R-2315-07
8442	KICH	TCGA-KM-8442-01A-11R-2315-07
8443	KICH	TCGA-KM-8443-01A-11R-2315-07
8476	KICH	TCGA-KM-8476-01A-11R-2315-07
8477	KICH	TCGA-KM-8477-01A-11R-2315-07
8423	KICH	TCGA-KN-8423-01A-11R-2315-07
8426	KICH	TCGA-KN-8426-01A-11R-2315-07
8425	KICH	TCGA-KN-8425-01A-11R-2315-07
8432	KICH	TCGA-KN-8432-01A-11R-2315-07
8431	KICH	TCGA-KN-8431-01A-11R-2315-07
8433	KICH	TCGA-KN-8433-01A-11R-2315-07
8405	KICH	TCGA-KO-8405-01A-11R-2315-07
8404	KICH	TCGA-KO-8404-01A-11R-2315-07
8413	KICH	TCGA-KO-8413-01A-11R-2315-07
8414	KICH	TCGA-KO-8414-01A-11R-2315-07
8415	KICH	TCGA-KO-8415-01A-11R-2315-07
8639	KICH	TCGA-KM-8639-01A-11R-2403-07
3311	KIRC	TCGA-A3-3311-01A-02R-1325-07
3313	KIRC	TCGA-A3-3313-01A-02R-1325-07
3316	KIRC	TCGA-A3-3316-01A-01R-0864-07
3317	KIRC	TCGA-A3-3317-01A-02R-1325-07
3319	KIRC	TCGA-A3-3319-01A-02R-1325-07
3320	KIRC	TCGA-A3-3320-01A-02R-1325-07
3322	KIRC	TCGA-A3-3322-01A-02R-1325-07
3323	KIRC	TCGA-A3-3323-01A-02R-1325-07
3331	KIRC	TCGA-A3-3331-01A-02R-1325-07
3357	KIRC	TCGA-A3-3357-01A-02R-1420-07
3363	KIRC	TCGA-A3-3363-01A-01R-0864-07
3365	KIRC	TCGA-A3-3365-01A-01R-0864-07
3367	KIRC	TCGA-A3-3367-01A-02R-1420-07
3373	KIRC	TCGA-A3-3373-01A-02R-1420-07
3374	KIRC	TCGA-A3-3374-01A-02R-1325-07
3378	KIRC	TCGA-A3-3378-01A-02R-1325-07
3380	KIRC	TCGA-A3-3380-01A-01R-0864-07
3382	KIRC	TCGA-A3-3382-01A-02R-1325-07
3385	KIRC	TCGA-A3-3385-01A-02R-1420-07
3427	KIRC	TCGA-AK-3427-01A-01R-0864-07
3440	KIRC	TCGA-AK-3440-01A-02R-1277-07
3443	KIRC	TCGA-AK-3443-01A-02R-1325-07
3465	KIRC	TCGA-AK-3465-01A-02R-1325-07
3777	KIRC	TCGA-AS-3777-01A-01R-0864-07
4823	KIRC	TCGA-B0-4823-01A-02R-1420-07
4827	KIRC	TCGA-B0-4827-01A-02R-1420-07
4842	KIRC	TCGA-B0-4842-01A-02R-1420-07
4945	KIRC	TCGA-B0-4945-01A-01R-1420-07
5075	KIRC	TCGA-B0-5075-01A-01R-1334-07
5077	KIRC	TCGA-B0-5077-01A-01R-1334-07
5081	KIRC	TCGA-B0-5081-01A-01R-1334-07
5083	KIRC	TCGA-B0-5083-01A-02R-1420-07
5084	KIRC	TCGA-B0-5084-01A-01R-1334-07
5085	KIRC	TCGA-B0-5085-01A-01R-1334-07
5088	KIRC	TCGA-B0-5088-01A-01R-1334-07
5092	KIRC	TCGA-B0-5092-01A-01R-1420-07
5095	KIRC	TCGA-B0-5095-01A-01R-1420-07
5096	KIRC	TCGA-B0-5096-01A-01R-1420-07
5097	KIRC	TCGA-B0-5097-01A-01R-1420-07
5098	KIRC	TCGA-B0-5098-01A-01R-1420-07
5099	KIRC	TCGA-B0-5099-01A-01R-1420-07
5100	KIRC	TCGA-B0-5100-01A-01R-1420-07
5102	KIRC	TCGA-B0-5102-01A-01R-1420-07
5104	KIRC	TCGA-B0-5104-01A-01R-1420-07
5106	KIRC	TCGA-B0-5106-01A-01R-1420-07
5107	KIRC	TCGA-B0-5107-01A-01R-1420-07
5108	KIRC	TCGA-B0-5108-01A-01R-1420-07
5109	KIRC	TCGA-B0-5109-01A-02R-1420-07
5110	KIRC	TCGA-B0-5110-01A-01R-1420-07
5113	KIRC	TCGA-B0-5113-01A-01R-1420-07
5115	KIRC	TCGA-B0-5115-01A-01R-1420-07
5116	KIRC	TCGA-B0-5116-01A-02R-1420-07
5117	KIRC	TCGA-B0-5117-01A-01R-1420-07
5119	KIRC	TCGA-B0-5119-01A-02R-1420-07
5120	KIRC	TCGA-B0-5120-01A-01R-1420-07
5121	KIRC	TCGA-B0-5121-01A-02R-1420-07
5698	KIRC	TCGA-B0-5698-01A-11R-1672-07
5710	KIRC	TCGA-B0-5710-01A-11R-1672-07
5711	KIRC	TCGA-B0-5711-01A-11R-1672-07
5712	KIRC	TCGA-B0-5712-01A-11R-1672-07
5713	KIRC	TCGA-B0-5713-01A-11R-1672-07
5812	KIRC	TCGA-B0-5812-01A-11R-1672-07
3923	KIRC	TCGA-B2-3923-01A-02R-1325-07
3924	KIRC	TCGA-B2-3924-01A-02R-1325-07
4098	KIRC	TCGA-B2-4098-01A-02R-1325-07
5832	KIRC	TCGA-B4-5832-01A-11R-1672-07
5834	KIRC	TCGA-B4-5834-01A-11R-1672-07
5835	KIRC	TCGA-B4-5835-01A-11R-1672-07
5836	KIRC	TCGA-B4-5836-01A-11R-1672-07
5838	KIRC	TCGA-B4-5838-01A-11R-1672-07
5843	KIRC	TCGA-B4-5843-01A-11R-1672-07
5844	KIRC	TCGA-B4-5844-01A-11R-1672-07
4146	KIRC	TCGA-B8-4146-01B-11R-1672-07
4153	KIRC	TCGA-B8-4153-01B-11R-1672-07
4619	KIRC	TCGA-B8-4619-01A-02R-1325-07
4620	KIRC	TCGA-B8-4620-01A-02R-1325-07
4622	KIRC	TCGA-B8-4622-01A-02R-1277-07
5158	KIRC	TCGA-B8-5158-01A-01R-1420-07
5159	KIRC	TCGA-B8-5159-01A-01R-1420-07
5162	KIRC	TCGA-B8-5162-01A-01R-1420-07
5163	KIRC	TCGA-B8-5163-01A-01R-1420-07
5164	KIRC	TCGA-B8-5164-01A-01R-1420-07
5165	KIRC	TCGA-B8-5165-01A-01R-1420-07
5545	KIRC	TCGA-B8-5545-01A-01R-1672-07
5552	KIRC	TCGA-B8-5552-01B-11R-1672-07
4177	KIRC	TCGA-BP-4177-01A-02R-1420-07
4760	KIRC	TCGA-BP-4760-01A-02R-1420-07
4782	KIRC	TCGA-BP-4782-01A-02R-1420-07
4795	KIRC	TCGA-BP-4795-01A-02R-1420-07
4801	KIRC	TCGA-BP-4801-01A-02R-1420-07
4960	KIRC	TCGA-BP-4960-01A-01R-1334-07
4961	KIRC	TCGA-BP-4961-01A-01R-1334-07
4962	KIRC	TCGA-BP-4962-01A-01R-1334-07
4963	KIRC	TCGA-BP-4963-01A-01R-1334-07
4964	KIRC	TCGA-BP-4964-01A-01R-1334-07
4965	KIRC	TCGA-BP-4965-01A-01R-1334-07
4967	KIRC	TCGA-BP-4967-01A-01R-1334-07
4970	KIRC	TCGA-BP-4970-01A-01R-1334-07
4971	KIRC	TCGA-BP-4971-01A-01R-1334-07
4972	KIRC	TCGA-BP-4972-01A-01R-1334-07
4973	KIRC	TCGA-BP-4973-01A-01R-1334-07
4974	KIRC	TCGA-BP-4974-01A-01R-1334-07
4975	KIRC	TCGA-BP-4975-01A-01R-1334-07
4976	KIRC	TCGA-BP-4976-01A-01R-1334-07
4981	KIRC	TCGA-BP-4981-01A-01R-1334-07
4982	KIRC	TCGA-BP-4982-01A-01R-1334-07
4983	KIRC	TCGA-BP-4983-01A-01R-1334-07
4985	KIRC	TCGA-BP-4985-01A-01R-1334-07
4986	KIRC	TCGA-BP-4986-01A-01R-1334-07
4987	KIRC	TCGA-BP-4987-01A-01R-1334-07
4988	KIRC	TCGA-BP-4988-01A-01R-1334-07
4991	KIRC	TCGA-BP-4991-01A-01R-1334-07
4992	KIRC	TCGA-BP-4992-01A-01R-1334-07
4993	KIRC	TCGA-BP-4993-01A-02R-1420-07
4994	KIRC	TCGA-BP-4994-01A-01R-1334-07
4995	KIRC	TCGA-BP-4995-01A-01R-1334-07
4998	KIRC	TCGA-BP-4998-01A-01R-1334-07
5000	KIRC	TCGA-BP-5000-01A-01R-1334-07
5001	KIRC	TCGA-BP-5001-01A-01R-1334-07
5004	KIRC	TCGA-BP-5004-01A-01R-1334-07
5006	KIRC	TCGA-BP-5006-01A-01R-1334-07
5007	KIRC	TCGA-BP-5007-01A-01R-1334-07
5008	KIRC	TCGA-BP-5008-01A-01R-1334-07
5009	KIRC	TCGA-BP-5009-01A-01R-1334-07
5169	KIRC	TCGA-BP-5169-01A-01R-1426-07
5170	KIRC	TCGA-BP-5170-01A-01R-1426-07
5173	KIRC	TCGA-BP-5173-01A-01R-1426-07
5174	KIRC	TCGA-BP-5174-01A-01R-1426-07
5175	KIRC	TCGA-BP-5175-01A-01R-1426-07
5176	KIRC	TCGA-BP-5176-01A-01R-1426-07
5177	KIRC	TCGA-BP-5177-01A-01R-1426-07
5178	KIRC	TCGA-BP-5178-01A-01R-1426-07
5180	KIRC	TCGA-BP-5180-01A-01R-1426-07
5181	KIRC	TCGA-BP-5181-01A-01R-1426-07
5182	KIRC	TCGA-BP-5182-01A-01R-1426-07
5183	KIRC	TCGA-BP-5183-01A-01R-1426-07
5187	KIRC	TCGA-BP-5187-01A-01R-1426-07
5189	KIRC	TCGA-BP-5189-01A-02R-1426-07
5190	KIRC	TCGA-BP-5190-01A-01R-1426-07
5191	KIRC	TCGA-BP-5191-01A-01R-1426-07
5192	KIRC	TCGA-BP-5192-01A-01R-1426-07
5194	KIRC	TCGA-BP-5194-01A-02R-1426-07
5195	KIRC	TCGA-BP-5195-01A-02R-1426-07
5196	KIRC	TCGA-BP-5196-01A-01R-1426-07
5198	KIRC	TCGA-BP-5198-01A-01R-1426-07
5199	KIRC	TCGA-BP-5199-01A-01R-1426-07
5200	KIRC	TCGA-BP-5200-01A-01R-1426-07
5201	KIRC	TCGA-BP-5201-01A-01R-1426-07
5202	KIRC	TCGA-BP-5202-01A-02R-1426-07
4869	KIRC	TCGA-CJ-4869-01A-02R-1426-07
4882	KIRC	TCGA-CJ-4882-01A-02R-1426-07
4897	KIRC	TCGA-CJ-4897-01A-03R-1426-07
4900	KIRC	TCGA-CJ-4900-01A-01R-1334-07
4901	KIRC	TCGA-CJ-4901-01A-01R-1426-07
4902	KIRC	TCGA-CJ-4902-01A-01R-1426-07
4903	KIRC	TCGA-CJ-4903-01A-01R-1426-07
4904	KIRC	TCGA-CJ-4904-01A-02R-1426-07
4905	KIRC	TCGA-CJ-4905-01A-02R-1426-07
4907	KIRC	TCGA-CJ-4907-01A-01R-1426-07
4908	KIRC	TCGA-CJ-4908-01A-01R-1426-07
4912	KIRC	TCGA-CJ-4912-01A-01R-1426-07
4916	KIRC	TCGA-CJ-4916-01A-01R-1426-07
4920	KIRC	TCGA-CJ-4920-01A-01R-1426-07
4923	KIRC	TCGA-CJ-4923-01A-01R-1426-07
5686	KIRC	TCGA-CJ-5686-01A-11R-1672-07
6027	KIRC	TCGA-CJ-6027-01A-11R-1672-07
6028	KIRC	TCGA-CJ-6028-01A-11R-1672-07
6030	KIRC	TCGA-CJ-6030-01A-11R-1672-07
6031	KIRC	TCGA-CJ-6031-01A-11R-1672-07
6032	KIRC	TCGA-CJ-6032-01A-11R-1672-07
5580	KIRC	TCGA-CW-5580-01A-01R-1672-07
6090	KIRC	TCGA-CW-6090-01A-11R-1672-07
6097	KIRC	TCGA-CW-6097-01A-11R-1672-07
4853	KIRC	TCGA-CZ-4853-01A-01R-1426-07
4859	KIRC	TCGA-CZ-4859-01A-02R-1426-07
5982	KIRC	TCGA-CZ-5982-01A-11R-1672-07
5984	KIRC	TCGA-CZ-5984-01A-11R-1672-07
5985	KIRC	TCGA-CZ-5985-01A-11R-1672-07
5986	KIRC	TCGA-CZ-5986-01A-11R-1672-07
5988	KIRC	TCGA-CZ-5988-01A-11R-1672-07
5989	KIRC	TCGA-CZ-5989-01A-11R-1672-07
3453	KIRC	TCGA-AK-3453-01A-02R-1277-07
3326	KIRC	TCGA-A3-3326-01A-01R-0864-07
3376	KIRC	TCGA-A3-3376-01A-02R-1420-07
3444	KIRC	TCGA-AK-3444-01A-02R-1325-07
5184	KIRC	TCGA-BP-5184-01A-01R-1426-07
5186	KIRC	TCGA-BP-5186-01A-01R-1426-07
5904	KIRC	TCGA-EU-5904-01A-11R-1672-07
5905	KIRC	TCGA-EU-5905-01A-11R-1672-07
5906	KIRC	TCGA-EU-5906-01A-11R-1672-07
3346	KIRC	TCGA-A3-3346-01A-01R-1766-07
3447	KIRC	TCGA-AK-3447-01A-01R-1766-07
5185	KIRC	TCGA-BP-5185-01A-01R-1426-07
5907	KIRC	TCGA-EU-5907-01A-11R-1672-07
3383	KIRC	TCGA-A3-3383-01A-02R-1325-07
3778	KIRC	TCGA-AS-3778-01A-01R-A32Z-07
7045	KIRP	TCGA-BQ-7045-01A-31R-1965-07
6132	KIRP	TCGA-DZ-6132-01A-11R-1965-07
5561	KIRP	TCGA-DW-5561-01A-01R-1592-07
7062	KIRP	TCGA-BQ-7062-01A-11R-1965-07
6790	KIRP	TCGA-G7-6790-01A-11R-1965-07
4116	KIRP	TCGA-B9-4116-01A-02R-1351-07
7050	KIRP	TCGA-BQ-7050-01A-11R-1965-07
6131	KIRP	TCGA-DZ-6131-01A-11R-1965-07
4104	KIRP	TCGA-B3-4104-01A-02R-1351-07
7061	KIRP	TCGA-BQ-7061-01A-11R-1965-07
5893	KIRP	TCGA-BQ-5893-01A-11R-1592-07
3468	KIRP	TCGA-AL-3468-01A-02R-1351-07
3472	KIRP	TCGA-AL-3472-01A-01R-1193-07
5876	KIRP	TCGA-BQ-5876-01A-11R-1592-07
7059	KIRP	TCGA-BQ-7059-01A-11R-1965-07
4103	KIRP	TCGA-B3-4103-01A-02R-1351-07
3466	KIRP	TCGA-AL-3466-01A-02R-1351-07
5902	KIRP	TCGA-EV-5902-01A-11R-1592-07
7056	KIRP	TCGA-BQ-7056-01A-11R-1965-07
5891	KIRP	TCGA-BQ-5891-01A-11R-1592-07
3926	KIRP	TCGA-B3-3926-01A-02R-1351-07
7048	KIRP	TCGA-BQ-7048-01A-11R-1965-07
5894	KIRP	TCGA-BQ-5894-01A-11R-1592-07
5156	KIRP	TCGA-B9-5156-01A-01R-1592-07
7060	KIRP	TCGA-BQ-7060-01A-11R-1965-07
6134	KIRP	TCGA-DZ-6134-01A-11R-1965-07
7044	KIRP	TCGA-BQ-7044-01A-11R-1965-07
3467	KIRP	TCGA-AL-3467-01A-02R-1351-07
5892	KIRP	TCGA-BQ-5892-01A-11R-1592-07
5901	KIRP	TCGA-EV-5901-01A-11R-1592-07
6135	KIRP	TCGA-DZ-6135-01A-11R-1965-07
4117	KIRP	TCGA-B9-4117-01A-02R-1351-07
3473	KIRP	TCGA-AL-3473-01A-01R-1193-07
5881	KIRP	TCGA-BQ-5881-01A-11R-1592-07
4113	KIRP	TCGA-B9-4113-01A-01R-1193-07
3925	KIRP	TCGA-B3-3925-01A-02R-1351-07
5877	KIRP	TCGA-BQ-5877-01A-11R-1592-07
6793	KIRP	TCGA-G7-6793-01A-11R-1965-07
7053	KIRP	TCGA-BQ-7053-01A-11R-1965-07
5888	KIRP	TCGA-BQ-5888-01A-11R-1592-07
5903	KIRP	TCGA-EV-5903-01A-11R-1592-07
5886	KIRP	TCGA-BQ-5886-01A-11R-1592-07
5879	KIRP	TCGA-BQ-5879-01A-11R-1592-07
5883	KIRP	TCGA-BQ-5883-01A-11R-1592-07
4617	KIRP	TCGA-B9-4617-01A-01R-1193-07
5885	KIRP	TCGA-BQ-5885-01A-11R-1592-07
6133	KIRP	TCGA-DZ-6133-01A-11R-1965-07
4115	KIRP	TCGA-B9-4115-01A-01R-1193-07
5889	KIRP	TCGA-BQ-5889-01A-11R-1592-07
4114	KIRP	TCGA-B9-4114-01A-01R-1193-07
5880	KIRP	TCGA-BQ-5880-01A-11R-1592-07
7049	KIRP	TCGA-BQ-7049-01A-11R-1965-07
6789	KIRP	TCGA-G7-6789-01A-11R-1965-07
5882	KIRP	TCGA-BQ-5882-01A-11R-1592-07
7051	KIRP	TCGA-BQ-7051-01A-12R-1965-07
5884	KIRP	TCGA-BQ-5884-01A-11R-1592-07
5560	KIRP	TCGA-DW-5560-01A-01R-1592-07
5878	KIRP	TCGA-BQ-5878-01A-11R-1592-07
6795	KIRP	TCGA-G7-6795-01A-11R-1965-07
5890	KIRP	TCGA-BQ-5890-01A-11R-1592-07
5887	KIRP	TCGA-BQ-5887-01A-11R-1965-07
7058	KIRP	TCGA-BQ-7058-01A-11R-1965-07
7997	KIRP	TCGA-A4-7997-01A-11R-2204-07
5398	KIRP	TCGA-B1-5398-01A-02R-1592-07
7046	KIRP	TCGA-BQ-7046-01A-11R-1965-07
6792	KIRP	TCGA-G7-6792-01A-21R-1965-07
6796	KIRP	TCGA-G7-6796-01A-11R-1965-07
6797	KIRP	TCGA-G7-6797-01A-11R-1965-07
7501	KIRP	TCGA-G7-7501-01A-11R-2204-07
7502	KIRP	TCGA-G7-7502-01A-11R-2204-07
6846	KIRP	TCGA-GL-6846-01A-11R-1965-07
7966	KIRP	TCGA-GL-7966-01A-11R-2204-07
7128	KIRP	TCGA-HE-7128-01A-11R-1965-07
7129	KIRP	TCGA-HE-7129-01A-11R-1965-07
7130	KIRP	TCGA-HE-7130-01A-11R-1965-07
7287	KIRP	TCGA-A4-7287-01A-11R-2139-07
7584	KIRP	TCGA-A4-7584-01A-11R-2139-07
7585	KIRP	TCGA-A4-7585-01A-11R-2139-07
7915	KIRP	TCGA-A4-7915-01A-11R-2204-07
7996	KIRP	TCGA-A4-7996-01A-11R-2204-07
8098	KIRP	TCGA-A4-8098-01A-11R-2404-07
8310	KIRP	TCGA-A4-8310-01A-11R-2404-07
8311	KIRP	TCGA-A4-8311-01A-11R-2404-07
8312	KIRP	TCGA-A4-8312-01A-11R-2404-07
8515	KIRP	TCGA-A4-8515-01A-11R-2404-07
8516	KIRP	TCGA-A4-8516-01A-11R-2404-07
8517	KIRP	TCGA-A4-8517-01A-11R-2404-07
8518	KIRP	TCGA-A4-8518-01A-11R-2404-07
8630	KIRP	TCGA-A4-8630-01A-11R-2404-07
7173	KIRP	TCGA-AL-7173-01A-11R-2139-07
8121	KIRP	TCGA-B3-8121-01A-21R-2404-07
5155	KIRP	TCGA-B9-5155-01A-01R-1592-07
5875	KIRP	TCGA-BQ-5875-01A-11R-1592-07
7834	KIRP	TCGA-DW-7834-01A-11R-2139-07
7837	KIRP	TCGA-DW-7837-01A-11R-2139-07
7838	KIRP	TCGA-DW-7838-01A-11R-2139-07
7839	KIRP	TCGA-DW-7839-01A-11R-2139-07
8500	KIRP	TCGA-GL-8500-01A-11R-2404-07
8195	KIRP	TCGA-IZ-8195-01A-31R-2404-07
8196	KIRP	TCGA-IZ-8196-01A-11R-2404-07
6720	KIRP	TCGA-J7-6720-01A-11R-2139-07
8537	KIRP	TCGA-J7-8537-01A-11R-2404-07
7732	KIRP	TCGA-A4-7732-01A-11R-2139-07
7828	KIRP	TCGA-A4-7828-01A-11R-2139-07
A5DU	KIRP	TCGA-A4-A5DU-01A-11R-A28H-07
A5Y1	KIRP	TCGA-A4-A5Y1-01A-11R-A28H-07
A5NU	KIRP	TCGA-AT-A5NU-01A-11R-A28H-07
A5W8	KIRP	TCGA-B9-A5W8-01A-11R-A28H-07
A5W9	KIRP	TCGA-B9-A5W9-01A-11R-A28H-07
7963	KIRP	TCGA-DW-7963-01B-11R-A28H-07
A59T	KIRP	TCGA-GL-A59T-01A-21R-A28H-07
A5EB	KIRP	TCGA-P4-A5EB-01A-11R-A28H-07
A5Z8	KIRP	TCGA-PJ-A5Z8-01A-11R-A28H-07
A5Z9	KIRP	TCGA-PJ-A5Z9-01A-11R-A28H-07
A48D	KIRP	TCGA-A4-A48D-01A-11R-A24Z-07
A47M	KIRP	TCGA-B1-A47M-01A-11R-A24Z-07
A47N	KIRP	TCGA-B1-A47N-01A-11R-A24Z-07
A47O	KIRP	TCGA-B1-A47O-01A-11R-A24Z-07
A44B	KIRP	TCGA-B9-A44B-01A-11R-A24Z-07
A4JJ	KIRP	TCGA-F9-A4JJ-01A-11R-A24Z-07
A4EM	KIRP	TCGA-GL-A4EM-01A-11R-A24Z-07
A40U	KIRP	TCGA-IA-A40U-01A-11R-A24Z-07
A40X	KIRP	TCGA-IA-A40X-01A-11R-A24Z-07
A40Y	KIRP	TCGA-IA-A40Y-01A-11R-A24Z-07
A4ZT	KIRP	TCGA-A4-A4ZT-01A-11R-A26U-07
A57E	KIRP	TCGA-A4-A57E-01A-11R-A26U-07
A5DJ	KIRP	TCGA-AL-A5DJ-01A-11R-A26U-07
A59R	KIRP	TCGA-GL-A59R-01A-11R-A26U-07
A5NF	KIRP	TCGA-HE-A5NF-01A-11R-A26U-07
A5NH	KIRP	TCGA-HE-A5NH-01A-11R-A26U-07
A5NI	KIRP	TCGA-HE-A5NI-01A-11R-A26U-07
A5NJ	KIRP	TCGA-HE-A5NJ-01A-11R-A26U-07
A5NK	KIRP	TCGA-HE-A5NK-01A-11R-A26U-07
A5NL	KIRP	TCGA-HE-A5NL-01A-11R-A26U-07
A55W	KIRP	TCGA-MH-A55W-01A-11R-A26U-07
A55Z	KIRP	TCGA-MH-A55Z-01A-11R-A26U-07
A560	KIRP	TCGA-MH-A560-01A-11R-A26U-07
A561	KIRP	TCGA-MH-A561-01A-11R-A26U-07
A562	KIRP	TCGA-MH-A562-01A-11R-A26U-07
A5Y0	KIRP	TCGA-A4-A5Y0-01A-11R-A31O-07
A6HP	KIRP	TCGA-A4-A6HP-01A-11R-A31O-07
A654	KIRP	TCGA-B1-A654-01A-11R-A31O-07
A655	KIRP	TCGA-B1-A655-01A-11R-A31O-07
A656	KIRP	TCGA-B1-A656-01A-11R-A31O-07
A657	KIRP	TCGA-B1-A657-01A-11R-A31O-07
A5W7	KIRP	TCGA-B9-A5W7-01A-11R-A31O-07
A69E	KIRP	TCGA-B9-A69E-01A-11R-A31O-07
7055	KIRP	TCGA-BQ-7055-01A-11R-1965-07
A4TM	KIRP	TCGA-G7-A4TM-01A-11R-A31O-07
A6M8	KIRP	TCGA-IZ-A6M8-01A-11R-A31O-07
A6M9	KIRP	TCGA-IZ-A6M9-01A-11R-A31O-07
A6GD	KIRP	TCGA-KV-A6GD-01A-11R-A31O-07
A6GE	KIRP	TCGA-KV-A6GE-01A-11R-A31O-07
A5E6	KIRP	TCGA-P4-A5E6-01A-11R-A28H-07
A5E7	KIRP	TCGA-P4-A5E7-01A-31R-A28H-07
A5E8	KIRP	TCGA-P4-A5E8-01A-11R-A28H-07
A5EA	KIRP	TCGA-P4-A5EA-01A-11R-A28H-07
A5ED	KIRP	TCGA-P4-A5ED-01A-11R-A28H-07
A5QZ	KIRP	TCGA-Q2-A5QZ-01A-11R-A28H-07
A5XZ	KIRP	TCGA-A4-A5XZ-01A-11R-A31O-07
7288	KIRP	TCGA-A4-7288-01A-11R-A32Z-07
7583	KIRP	TCGA-A4-7583-01A-11R-A32Z-07
7734	KIRP	TCGA-A4-7734-01A-11R-A32Z-07
7268	KIRP	TCGA-B9-7268-01A-11R-A32Z-07
7840	KIRP	TCGA-DW-7840-01A-11R-A32Z-07
7841	KIRP	TCGA-DW-7841-01A-11R-A32Z-07
7842	KIRP	TCGA-DW-7842-01A-11R-A32Z-07
7773	KIRP	TCGA-GL-7773-01A-11R-A32Z-07
7286	KIRP	TCGA-A4-7286-01A-11R-A32Z-07
5274	LGG	TCGA-DB-5274-01A-01R-1470-07
5303	LGG	TCGA-E1-5303-01A-01R-1470-07
5304	LGG	TCGA-E1-5304-01A-01R-1470-07
4944	LGG	TCGA-CS-4944-01A-01R-1470-07
6408	LGG	TCGA-DU-6408-01A-11R-1708-07
6407	LGG	TCGA-DU-6407-01A-13R-1708-07
6290	LGG	TCGA-CS-6290-01A-11R-1708-07
5302	LGG	TCGA-E1-5302-01A-01R-1470-07
5854	LGG	TCGA-DU-5854-01A-11R-1708-07
5273	LGG	TCGA-DB-5273-01A-01R-1470-07
6403	LGG	TCGA-DU-6403-01A-11R-1708-07
6397	LGG	TCGA-DU-6397-01A-11R-1708-07
5852	LGG	TCGA-DU-5852-01A-11R-1708-07
6405	LGG	TCGA-DU-6405-01A-11R-1708-07
4941	LGG	TCGA-CS-4941-01A-01R-1470-07
5871	LGG	TCGA-DU-5871-01A-12R-1708-07
4942	LGG	TCGA-CS-4942-01A-01R-1470-07
5870	LGG	TCGA-DU-5870-01A-11R-1708-07
5140	LGG	TCGA-DH-5140-01A-01R-1470-07
5280	LGG	TCGA-DB-5280-01A-01R-1470-07
5855	LGG	TCGA-DU-5855-01A-11R-1708-07
6399	LGG	TCGA-DU-6399-01A-12R-1708-07
5390	LGG	TCGA-CS-5390-01A-02R-1470-07
6406	LGG	TCGA-DU-6406-01A-11R-1708-07
5963	LGG	TCGA-FG-5963-01A-11R-1708-07
6402	LGG	TCGA-DU-6402-01A-11R-1708-07
5270	LGG	TCGA-DB-5270-01A-02R-1470-07
5847	LGG	TCGA-DU-5847-01A-11R-1708-07
5141	LGG	TCGA-DH-5141-01A-01R-1470-07
6396	LGG	TCGA-DU-6396-01A-11R-1708-07
5275	LGG	TCGA-DB-5275-01A-01R-1470-07
4943	LGG	TCGA-CS-4943-01A-01R-1470-07
6395	LGG	TCGA-DU-6395-01A-13R-1708-07
5311	LGG	TCGA-E1-5311-01A-01R-1470-07
5396	LGG	TCGA-CS-5396-01A-02R-1470-07
5872	LGG	TCGA-DU-5872-01A-11R-1708-07
5849	LGG	TCGA-DU-5849-01A-11R-1708-07
5281	LGG	TCGA-DB-5281-01A-01R-1470-07
6394	LGG	TCGA-DU-6394-01A-11R-1708-07
6392	LGG	TCGA-DU-6392-01A-11R-1708-07
6404	LGG	TCGA-DU-6404-01A-11R-1708-07
6400	LGG	TCGA-DU-6400-01A-12R-1708-07
6393	LGG	TCGA-DU-6393-01A-11R-1708-07
5965	LGG	TCGA-FG-5965-01B-11R-1896-07
7610	LGG	TCGA-HT-7610-01A-21R-2090-07
7013	LGG	TCGA-DU-7013-01A-11R-2027-07
5962	LGG	TCGA-FG-5962-01B-11R-1896-07
7290	LGG	TCGA-DU-7290-01A-11R-2027-07
7292	LGG	TCGA-DU-7292-01A-11R-2027-07
7474	LGG	TCGA-HT-7474-01A-11R-2027-07
7467	LGG	TCGA-HT-7467-01A-11R-2027-07
7476	LGG	TCGA-HT-7476-01A-11R-2027-07
7010	LGG	TCGA-DU-7010-01A-11R-2027-07
5851	LGG	TCGA-DU-5851-01A-13R-1896-07
7300	LGG	TCGA-DU-7300-01A-21R-2090-07
6688	LGG	TCGA-FG-6688-01A-11R-1896-07
7475	LGG	TCGA-HT-7475-01A-11R-2027-07
7007	LGG	TCGA-DU-7007-01A-11R-2027-07
7478	LGG	TCGA-HT-7478-01A-11R-2027-07
7298	LGG	TCGA-DU-7298-01A-11R-2027-07
7011	LGG	TCGA-DU-7011-01A-11R-2027-07
7008	LGG	TCGA-DU-7008-01A-11R-2027-07
6542	LGG	TCGA-DU-6542-01A-11R-1896-07
5279	LGG	TCGA-DB-5279-01A-03R-2347-07
6689	LGG	TCGA-FG-6689-01A-11R-1896-07
7019	LGG	TCGA-DU-7019-01A-11R-2027-07
7483	LGG	TCGA-HT-7483-01A-11R-2027-07
7603	LGG	TCGA-HT-7603-01A-21R-2090-07
7473	LGG	TCGA-HT-7473-01A-11R-2027-07
7299	LGG	TCGA-DU-7299-01A-21R-2027-07
7495	LGG	TCGA-HW-7495-01A-11R-2027-07
7472	LGG	TCGA-HT-7472-01A-11R-2027-07
7493	LGG	TCGA-HW-7493-01A-11R-2027-07
7481	LGG	TCGA-HT-7481-01A-11R-2027-07
6667	LGG	TCGA-CS-6667-01A-12R-2027-07
7675	LGG	TCGA-IK-7675-01A-11R-2090-07
5322	LGG	TCGA-E1-5322-01A-01R-1470-07
7006	LGG	TCGA-DU-7006-01A-11R-2027-07
7468	LGG	TCGA-HT-7468-01A-11R-2027-07
7479	LGG	TCGA-HT-7479-01A-11R-2027-07
6670	LGG	TCGA-CS-6670-01A-11R-1896-07
5143	LGG	TCGA-DH-5143-01A-01R-1470-07
7482	LGG	TCGA-HT-7482-01A-11R-2027-07
7018	LGG	TCGA-DU-7018-01A-11R-2027-07
7609	LGG	TCGA-HT-7609-01A-11R-2090-07
6410	LGG	TCGA-DU-6410-01A-11R-1896-07
5305	LGG	TCGA-E1-5305-01A-01R-1896-07
7604	LGG	TCGA-HT-7604-01A-11R-2090-07
7638	LGG	TCGA-FG-7638-01B-12R-2090-07
7294	LGG	TCGA-DU-7294-01A-11R-2027-07
6690	LGG	TCGA-FG-6690-01A-11R-1896-07
6692	LGG	TCGA-FG-6692-01A-11R-1896-07
5307	LGG	TCGA-E1-5307-01A-01R-1896-07
7485	LGG	TCGA-HT-7485-01A-11R-2027-07
7637	LGG	TCGA-FG-7637-01A-11R-2090-07
6691	LGG	TCGA-FG-6691-01A-11R-1896-07
7491	LGG	TCGA-HW-7491-01A-11R-2027-07
6666	LGG	TCGA-CS-6666-01A-11R-1896-07
8158	LGG	TCGA-DU-8158-01A-11R-2256-07
8168	LGG	TCGA-DU-8168-01A-11R-2256-07
8161	LGG	TCGA-DU-8161-01A-11R-2256-07
8191	LGG	TCGA-FG-8191-01A-11R-2256-07
7692	LGG	TCGA-HT-7692-01A-12R-2256-07
7688	LGG	TCGA-HT-7688-01A-11R-2256-07
7690	LGG	TCGA-HT-7690-01A-11R-2256-07
7012	LGG	TCGA-DU-7012-01A-11R-2027-07
8165	LGG	TCGA-DU-8165-01A-11R-2256-07
8162	LGG	TCGA-DU-8162-01A-21R-2256-07
8125	LGG	TCGA-IK-8125-01A-11R-2256-07
7309	LGG	TCGA-DU-7309-01A-11R-2090-07
7605	LGG	TCGA-HT-7605-01A-11R-2090-07
7607	LGG	TCGA-HT-7607-01A-11R-2090-07
7687	LGG	TCGA-HT-7687-01A-11R-2256-07
7304	LGG	TCGA-DU-7304-01A-12R-2090-07
7470	LGG	TCGA-HT-7470-01A-12R-2090-07
7643	LGG	TCGA-FG-7643-01A-11R-2090-07
8181	LGG	TCGA-FG-8181-01A-11R-2256-07
5397	LGG	TCGA-CS-5397-01A-01R-1896-07
7694	LGG	TCGA-HT-7694-01A-11R-2256-07
8166	LGG	TCGA-DU-8166-01A-11R-2256-07
7854	LGG	TCGA-HT-7854-01A-11R-2256-07
[truncated: 2,296 more rows]

## Sheet: TCGAexome_SNV_samples
patient	cancer_type
A44Q	SKCM
6880	PAAD
4801	KIRC
A88V	ESCA
A3Y7	SKCM
7979	LUAD
A3BZ	SKCM
A1IA	SKCM
A29R	SKCM
A2MK	SKCM
7315	PRAD
A22J	THCA
A193	SKCM
A5JA	ACC
A3T1	THCA
A1OB	CESC
7386	HNSC
A5YG	ACC
A3A3	LIHC
A5LJ	ACC
3313	KIRC
4382	LUAD
A43J	ESCA
A1EG	LIHC
5277	LGG
A3J4	SKCM
A3A0	LIHC
A56G	ESCA
7645	PAAD
A114	LIHC
AA6A	STAD
Z056	LUAD
A2MS	SKCM
A70Z	LGG
A5HY	HNSC
A93E	ESCA
A88Z	ESCA
A8EX	ESCA
A93D	ESCA
A4MQ	ESCA
A1H6	CESC
4284	STAD
A9GI	ESCA
A7PF	CESC
A4S6	CESC
5262	LIHC
A726	SKCM
A4GC	STAD
A1EF	LIHC
A4U8	SKCM
Z033	LUAD
A4AX	CESC
A73P	CESC
A10W	LIHC
7885	PAAD
8196	KIRP
A8NS	ESCA
A4OO	ESCA
A6VZ	ESCA
A3TX	CESC
A6FD	ESCA
A7M6	LIHC
A25U	LIHC
A7EA	STAD
A10Y	LIHC
A10S	LIHC
A8JE	ESCA
A43B	CESC
A16X	UCEC
A0JV	UCEC
A11X	UCEC
A73O	CESC
A0UM	UCEC
A6FW	ESCA
A3HD	CESC
A0V6	UCEC
7651	PAAD
A7ZI	STAD
A4ND	LIHC
A0LN	UCEC
6493	HNSC
A3T6	THCA
A4JX	THCA
A0G3	UCEC
A6BV	ESCA
A2JO	SKCM
A6TC	BLCA
A4TF	LUAD
A3YN	SKCM
6392	LGG
A3XC	SKCM
A3MR	SKCM
A3T8	THCA
7150	LUAD
3331	KIRC
A6AW	BLCA
2656	LUAD
A0GM	UCEC
A0GQ	UCEC
A09N	BRCA
3427	KIRC
A056	UCEC
A05Z	UCEC
A0K1	UCEC
A0K4	UCEC
A0K6	UCEC
4074	HNSC
4078	HNSC
5151	HNSC
5555	HNSC
5556	HNSC
5557	HNSC
5558	HNSC
5559	HNSC
6868	HNSC
6869	HNSC
6870	HNSC
6871	HNSC
6872	HNSC
6873	HNSC
7269	HNSC
4223	HNSC
4224	HNSC
4225	HNSC
A0LX	UCEC
A0MG	UCEC
A18A	UCEC
A0Z0	THCA
A0Z9	THCA
A0ZA	THCA
A0ZC	THCA
A0ZE	THCA
A0ZG	THCA
A0ZH	THCA
A0ZJ	THCA
A18Y	THCA
A18Z	THCA
A28R	THCA
A28S	THCA
A28X	THCA
A28Z	THCA
A290	THCA
A2N7	THCA
A2N8	THCA
A2NA	THCA
A3EZ	THCA
A3F0	THCA
A3PR	THCA
A3PT	THCA
A3PU	THCA
A45D	THCA
A45E	THCA
A45G	THCA
A45J	THCA
A45K	THCA
A13K	THCA
A27D	THCA
A3ME	THCA
A484	THCA
A485	THCA
4723	HNSC
4725	HNSC
4726	HNSC
4728	HNSC
4729	HNSC
4730	HNSC
4733	HNSC
4735	HNSC
4736	HNSC
4738	HNSC
4739	HNSC
4742	HNSC
5355	HNSC
5356	HNSC
5358	HNSC
5367	HNSC
5369	HNSC
5370	HNSC
6010	HNSC
6012	HNSC
6013	HNSC
6017	HNSC
6022	HNSC
6989	HNSC
6997	HNSC
5329	HNSC
5331	HNSC
5334	HNSC
6220	HNSC
6221	HNSC
6223	HNSC
6229	HNSC
7068	HNSC
5243	HNSC
5247	HNSC
5248	HNSC
6471	HNSC
6477	HNSC
6481	HNSC
6484	HNSC
6491	HNSC
7365	HNSC
7368	HNSC
7369	HNSC
7370	HNSC
7371	HNSC
7372	HNSC
7374	HNSC
7379	HNSC
7382	HNSC
7388	HNSC
7390	HNSC
7391	HNSC
7392	HNSC
7394	HNSC
7395	HNSC
7397	HNSC
7398	HNSC
7401	HNSC
5434	HNSC
5436	HNSC
5439	HNSC
5441	HNSC
5966	HNSC
5970	HNSC
5976	HNSC
5977	HNSC
5979	HNSC
6933	HNSC
6934	HNSC
6935	HNSC
6936	HNSC
6937	HNSC
6938	HNSC
6939	HNSC
6940	HNSC
6943	HNSC
6948	HNSC
6951	HNSC
6952	HNSC
6953	HNSC
6954	HNSC
6955	HNSC
6959	HNSC
6960	HNSC
6962	HNSC
7089	HNSC
7091	HNSC
7095	HNSC
7097	HNSC
7101	HNSC
7102	HNSC
7103	HNSC
7104	HNSC
7177	HNSC
7178	HNSC
7183	HNSC
7235	HNSC
7238	HNSC
7242	HNSC
7243	HNSC
7245	HNSC
7248	HNSC
7250	HNSC
7252	HNSC
7253	HNSC
7261	HNSC
7263	HNSC
7406	HNSC
7413	HNSC
7418	HNSC
7421	HNSC
7422	HNSC
7423	HNSC
7427	HNSC
7432	HNSC
7434	HNSC
7435	HNSC
7438	HNSC
7440	HNSC
A0ZO	UCEC
A17N	UCEC
A17S	UCEC
A17T	UCEC
A17U	UCEC
6517	HNSC
6823	HNSC
6825	HNSC
A0XZ	THCA
A0Y2	THCA
A2OL	THCA
A3KN	THCA
A4M8	THCA
A13L	THCA
A13O	THCA
A13S	THCA
A13T	THCA
A13V	THCA
A13X	THCA
A1QD	THCA
A1QG	THCA
A1QH	THCA
A1QI	THCA
A1QQ	THCA
A2PO	THCA
A2PQ	THCA
A2PS	THCA
A2PT	THCA
A2PU	THCA
A2PX	THCA
A2Q0	THCA
A2Q1	THCA
A2Q5	THCA
A2Q7	THCA
A2QA	THCA
A2QC	THCA
A3UK	THCA
A3UM	THCA
A3UN	THCA
A3UO	THCA
A3UP	THCA
A3UR	THCA
A3UT	THCA
A3UU	THCA
A3UV	THCA
A3UW	THCA
A3UX	THCA
A3V7	THCA
A3VA	THCA
A3VB	THCA
A3VE	THCA
A3VF	THCA
A3VJ	THCA
A3VK	THCA
A3VL	THCA
A3VM	THCA
A4UW	THCA
A4V0	THCA
A4V2	THCA
A4V5	THCA
A1JZ	THCA
A2HM	THCA
5625	HNSC
7588	HNSC
A3DY	THCA
A3DZ	THCA
A3E0	THCA
A3E1	THCA
A3E3	THCA
A3E5	THCA
A242	THCA
A413	THCA
A415	THCA
A416	THCA
A419	THCA
A437	THCA
A3CN	THCA
A3CO	THCA
A3CR	THCA
A3CS	THCA
A3CT	THCA
A3CW	THCA
A3D5	THCA
A3D6	THCA
A3GP	THCA
A3GU	THCA
A3GX	THCA
A3H2	THCA
A3H3	THCA
A3H4	THCA
A3H5	THCA
A3H7	THCA
A3H8	THCA
A3MW	THCA
A3MX	THCA
A3N2	THCA
A3N3	THCA
A3T2	THCA
A3T3	THCA
A3T7	THCA
A3T9	THCA
A3TA	THCA
A3ZH	THCA
A3ZK	THCA
A3ZT	THCA
A4JZ	THCA
A4K2	THCA
A4K4	THCA
A4K6	THCA
A4KD	THCA
A4KG	THCA
A4KH	THCA
A4KI	THCA
A1CS	THCA
A1CT	THCA
A1CU	THCA
A1CV	THCA
A1CW	THCA
A22K	THCA
A22L	THCA
A22N	THCA
A2CK	THCA
A2CL	THCA
A2CO	THCA
A2CT	THCA
A2OY	THCA
A2P0	THCA
A3AJ	THCA
A3AK	THCA
A3AO	THCA
A3AP	THCA
A3FM	THCA
A3FP	THCA
A3O7	THCA
A3O8	THCA
A3O9	THCA
A3OA	THCA
A3OB	THCA
A4FK	THCA
A4FM	THCA
A4FR	THCA
A4G1	THCA
A25G	THCA
A25I	THCA
A25K	THCA
A2MY	THCA
A2N0	THCA
A2N1	THCA
A2N4	THCA
A2N5	THCA
A39I	THCA
A39J	THCA
A39K	THCA
A39M	THCA
A39O	THCA
A3BN	THCA
A3BO	THCA
A3BP	THCA
A3BS	THCA
A3BT	THCA
A3BX	THCA
A3DP	THCA
A3DR	THCA
A3DS	THCA
A3DT	THCA
A3DU	THCA
A40S	THCA
A230	THCA
A232	THCA
A235	THCA
A236	THCA
A3SB	THCA
A3SG	THCA
A3SH	THCA
A3BL	THCA
A3I4	THCA
A3I5	THCA
A3NM	THCA
A3NN	THCA
A3ON	THCA
A3R6	THCA
A3R7	THCA
A3R9	THCA
A3RA	THCA
A3W9	THCA
A40K	THCA
A4B3	THCA
A2C6	THCA
A26U	THCA
A2K9	THCA
A3RH	THCA
A3RI	THCA
A421	THCA
7774	HNSC
7831	HNSC
7832	HNSC
A3EB	THCA
A3U2	THCA
A3U3	THCA
7630	HNSC
A3NZ	THCA
A3O1	THCA
A3YE	THCA
A3YH	THCA
A41J	THCA
A4I9	THCA
A4N9	THCA
6822	STAD
8589	STAD
A6F5	STAD
7490	LGG
A3CE	SKCM
A29N	SKCM
A1PU	SKCM
A1I7	SKCM
A0ZM	CESC
A7X2	PCPG
A3SM	BLCA
A17H	UCEC
4261	STAD
A2MQ	SKCM
A29E	SKCM
A2GC	SKCM
A19F	SKCM
A182	SKCM
A2JL	SKCM
6132	KIRP
A149	SKCM
7082	HNSC
A2EW	UCEC
A25T	LIHC
A0YR	BLCA
A0MQ	UCEC
A3C6	SKCM
8662	LUAD
A6C0	LIHC
A4AV	CESC
A6K1	HNSC
A180	SKCM
A3HS	CESC
7562	LUAD
7060	KIRP
6133	KIRP
A2MJ	SKCM
A19B	SKCM
A3LL	CESC
A6GS	PCPG
A19P	SKCM
A54R	BLCA
A1QA	SKCM
7980	LUAD
A2EJ	BLCA
A4IS	SKCM
A73C	LIHC
A1PX	SKCM
7049	KIRP
A4W6	UCS
A3SS	BLCA
A20C	SKCM
A29Q	SKCM
A2MR	SKCM
6452	STAD
8487	STAD
A5TJ	STAD
A0K9	UCEC
6852	STAD
A1ZG	SKCM
3440	KIRC
A1BE	CESC
5790	PRAD
7414	HNSC
A4G9	STAD
A7HY	ESCA
A184	SKCM
A0UF	UCEC
A7MB	LIHC
7128	KIRP
A2M8	SKCM
A2GH	SKCM
A26S	LIHC
5432	HNSC
A2I6	BLCA
A4N4	LUAD
A1QB	SKCM
A4VK	LUAD
A0ZS	UCEC
A8P2	STAD
A2GR	SKCM
A10T	LIHC
A1PZ	SKCM
6797	KIRP
A4H5	STAD
A11B	LIHC
A5TW	LGG
A06L	UCEC
A11F	UCEC
A0MU	UCEC
7925	PAAD
5723	STAD
7099	HNSC
A0UV	UCEC
4668	LUAD
A497	HNSC
A181	SKCM
A10U	LIHC
A1ZB	SKCM
A2MD	SKCM
A45Z	HNSC
5260	LIHC
A3DM	SKCM
A3R5	SKCM
8286	STAD
A2GD	SKCM
A29X	SKCM
A3DL	SKCM
A4YQ	LUAD
A4H2	STAD
A3BM	BLCA
A1EJ	LIHC
A11C	LIHC
5890	KIRP
A0JY	UCEC
A69V	CESC
4731	HNSC
A804	STAD
A103	UCEC
A6RL	STAD
A1EB	LIHC
A11Y	UCEC
7132	STAD
A059	UCEC
A2EF	BLCA
A43P	BLCA
6351	PRAD
A6K2	HNSC
A4Y0	UCS
Z026	LUAD
A2RJ	CESC
A3LA	CESC
A1ZZ	SKCM
A26C	SKCM
A693	SKCM
A3AC	SKCM
A8JD	ESCA
A2M7	SKCM
A3MC	LIHC
A6TE	BLCA
A5VL	CESC
A25V	LIHC
A3AD	SKCM
A4G8	STAD
7568	HNSC
A51T	SKCM
7219	HNSC
A26D	SKCM
A19C	SKCM
A19N	SKCM
A3CB	SKCM
A1JX	SKCM
A6B6	BLCA
A43X	BLCA
A3B5	BLCA
A410	CESC
A893	ESCA
5781	LUAD
A5NB	STAD
7583	KIRP
A17Z	SKCM
A2MH	SKCM
A19M	SKCM
5525	PRAD
8327	KICH
8329	KICH
8333	KICH
8339	KICH
8340	KICH
8344	KICH
8404	KICH
8410	KICH
A265	SKCM
A15X	UCEC
A1I1	SKCM
A4OE	ESCA
A18G	BRCA
A5TS	LGG
7994	LUAD
A3AA	SKCM
A1EI	LIHC
A1Q0	SKCM
A1Q3	SKCM
A2A5	SKCM
7059	KIRP
5775	LUAD
A6GG	LIHC
A6C9	SKCM
8585	LUAD
A2MC	SKCM
A24D	SKCM
A0TZ	BRCA
A5ZZ	BLCA
A2GO	SKCM
8207	LUAD
A3HZ	CESC
A5Y1	KIRP
A17Y	SKCM
7953	LUAD
A5UL	SKCM
A5NL	KIRP
3918	LUAD
A4NJ	LIHC
A4VU	UCS
A1HT	LIHC
6941	HNSC
4465	STAD
8680	STAD
8591	STAD
A2NH	SKCM
A1EL	LIHC
A49U	ESCA
A20N	BLCA
6566	STAD
8496	LUAD
A19H	SKCM
5726	STAD
A261	SKCM
A0UA	UCEC
A39R	THCA
5816	STAD
A299	SKCM
6516	HNSC
8635	HNSC
3447	KIRC
A1Z0	SKCM
A1Q6	SKCM
A2GI	SKCM
4460	STAD
A17Q	UCEC
A7WX	PCPG
4249	LUAD
A20F	SKCM
A263	SKCM
A14N	BRCA
A431	SKCM
A2MM	SKCM
A2ME	SKCM
A6C8	SKCM
A6EC	SKCM
A5RA	LGG
5258	LIHC
7129	KIRP
A2JP	SKCM
A468	HNSC
A6VB	HNSC
A556	CESC
5373	HNSC
6995	HNSC
A13U	THCA
A3GV	THCA
A3GZ	THCA
7636	LGG
A4MR	ESCA
7958	STAD
A8WC	ESCA
A6FG	ESCA
A65G	PRAD
A5KE	BLCA
A39Y	LIHC
4963	KIRC
A3AE	SKCM
A1ZA	SKCM
A59V	PRAD
8089	LUAD
A0YX	BLCA
A3Q0	CESC
A11D	LIHC
A7IK	LIHC
A5EB	KIRP
8428	KICH
8413	KICH
8324	KICH
8326	KICH
8328	KICH
8330	KICH
8331	KICH
8335	KICH
8336	KICH
8343	KICH
8345	KICH
8346	KICH
8438	KICH
8439	KICH
8441	KICH
8443	KICH
8419	KICH
8425	KICH
8430	KICH
8431	KICH
8433	KICH
8436	KICH
8437	KICH
8408	KICH
8415	KICH
8414	KICH
8332	KICH
8338	KICH
8477	KICH
8423	KICH
8426	KICH
8432	KICH
8405	KICH
8334	KICH
A6RF	ESCA
AA2U	CHOL
A8W8	ESCA
A2JG	SKCM
A1ZN	SKCM
A3IS	BLCA
A4YP	LUAD
A3LH	CESC
A153	BRCA
5044	LUAD
A7BS	STAD
A6EX	STAD
A3Y4	CESC
A62P	BLCA
A29V	SKCM
A7HL	HNSC
8085	LUAD
7294	LGG
A8NE	ESCA
A4ZP	LIHC
A48A	STAD
A1MF	CESC
A29L	SKCM
A985	UVM
A2J6	SKCM
A728	SKCM
A3ZE	BLCA
4205	STAD
A8NJ	ESCA
A14O	BRCA
4250	LUAD
A5NF	KIRP
7704	STAD
A0T0	BRCA
1680	LUAD
A2M6	SKCM
A4SV	LUAD
A3LF	CESC
4982	KIRC
A769	SKCM
A0LM	UCEC
A5UA	BLCA
A5BI	HNSC
A4MG	STAD
A2GE	SKCM
A59K	LUAD
8602	STAD
7539	LUAD
A194	SKCM
4361	STAD
6802	STAD
7162	LUAD
A1BF	CESC
A8E2	STAD
5045	LUAD
A195	SKCM
4200	STAD
6851	LUAD
A3YL	BLCA
A17A	UCEC
A46O	LUAD
A183	SKCM
A7DV	BLCA
A1ZC	SKCM
7715	STAD
A81E	PCPG
A8P3	STAD
4188	STAD
4427	LUAD
A3AG	SKCM
A11E	UCEC
A47Y	BLCA
A3D1	THCA
8122	STAD
A5QA	HNSC
A5SG	SKCM
4122	LUAD
4305	STAD
A2J8	SKCM
6023	HNSC
A44R	SKCM
A2ML	SKCM
7039	LUAD
A1ZJ	SKCM
A1ZW	SKCM
A5U7	ESCA
A2MU	SKCM
A624	HNSC
A3DJ	SKCM
A2JF	SKCM
A2KM	CESC
A06H	UCEC
A3C7	SKCM
A439	CESC
A51G	SKCM
A3GJ	CESC
A196	SKCM
4740	HNSC
A1M5	CESC
8640	LUAD
A59F	UCS
A0WH	UCEC
A6HP	KIRP
A7IH	LIHC
A1ZQ	SKCM
A97H	ESCA
A2R7	CESC
4306	STAD
A40J	CESC
A1BQ	CESC
A4OI	ESCA
A2RO	CESC
AASW	ESCA
A4ON	ESCA
A8T7	ESCA
A5GL	SKCM
A6R0	SKCM
A2GB	SKCM
A3HL	CESC
A1IB	SKCM
A6EO	HNSC
A2OG	SKCM
A4F0	SKCM
A11U	UCEC
A5R2	CESC
A6AL	PRAD
A199	SKCM
7014	LGG
A92D	STAD
A5BZ	BLCA
A19W	SKCM
A5JP	ACC
7065	HNSC
A75I	LIHC
A25Z	LIHC
A8I3	CHOL
A7FA	PRAD
A3LK	CESC
A6QX	CESC
A8EZ	ESCA
A459	LIHC
A3IE	BLCA
A6XG	ESCA
A879	PRAD
A4MJ	STAD
AAPN	ESCA
A2RK	CESC
A73R	CESC
A5FO	CESC
A57G	CESC
A50E	CESC
A1QS	CESC
A75X	SKCM
A4GT	STAD
A4GX	STAD
A2JB	SKCM
A3TV	SKCM
A29M	SKCM
6777	LUAD
A0VQ	UCEC
A1ZH	SKCM
A5KB	ACC
6515	HNSC
A8NM	ESCA
A3HU	CESC
A2C7	SKCM
6979	LUAD
A3FN	THCA
A3A8	LIHC
A6T8	HNSC
4418	LUAD
A2JD	SKCM
8382	STAD
A4U3	SKCM
A267	SKCM
A6Y2	ESCA
A2GU	SKCM
8372	STAD
7254	HNSC
A4GN	STAD
A25W	LIHC
A1I5	SKCM
A20H	SKCM
A2MF	SKCM
8673	LUAD
A5TI	STAD
A2QQ	LIHC
A51Y	CESC
A7DU	BLCA
A3X1	BLCA
8244	STAD
A9GN	ESCA
A3JB	SKCM
A8IF	PRAD
7227	LUAD
A4ZQ	LIHC
6776	LUAD
A7IF	LIHC
6377	PRAD
A4HD	STAD
A4U7	SKCM
A6DJ	HNSC
A4Q7	UCS
A443	LUAD
A25S	LIHC
A5GO	SKCM
5644	LUAD
8620	LUAD
A541	BLCA
7109	LUAD
Z031	LUAD
A25Y	LIHC
A75C	LIHC
5739	PRAD
5762	PRAD
5933	LUAD
4405	LUAD
A4YV	STAD
A5SE	SKCM
7159	LUAD
A3X6	BLCA
4098	KIRC
A4H3	STAD
A5C7	LUAD
A4NV	LIHC
A2JC	SKCM
4823	KIRC
8080	STAD
A11J	UCEC
A5HB	ACC
A1AC	BLCA
A29P	SKCM
4104	KIRP
4679	LUAD
8060	STAD
8067	LUAD
6848	LUAD
A6EN	HNSC
A3TU	SKCM
A0IU	UCEC
4368	STAD
A3B8	BLCA
6981	LUAD
A4IJ	BLCA
A4YF	LUAD
5423	LUAD
A4Z3	SKCM
A5FP	SKCM
A24C	SKCM
7851	STAD
A2GL	SKCM
A6EY	STAD
A3ZF	BLCA
A216	LIHC
A8NW	ESCA
A2R8	CESC
AA36	CHOL
A3GK	CESC
A3Q8	CESC
AB1X	STAD
A119	LIHC
A4TZ	BLCA
A2I4	BLCA
A19A	SKCM
4073	LIHC
A4H8	STAD
5728	STAD
3373	KIRC
A3J7	SKCM
A3YO	SKCM
A217	LIHC
A4ZB	HNSC
A6C6	BLCA
A20U	BLCA
A2A2	SKCM
8297	STAD
A29D	SKCM
A08R	BRCA
A2M2	CESC
A2M1	CESC
A3C3	SKCM
A3IK	BLCA
A1ZE	SKCM
7056	KIRP
4112	LUAD
A3MU	SKCM
A3HR	CESC
7130	KIRP
A6E9	SKCM
8302	LUAD
5727	STAD
A6TG	BLCA
A3RD	BLCA
3396	LUAD
A7W4	PAAD
7703	STAD
A42F	BLCA
A15R	BRCA
7667	LUAD
5375	LUAD
A1MK	CESC
A5UD	LIHC
A2PM	CESC
A3L1	CESC
A5S3	ESCA
A7HW	ESCA
A4NL	LIHC
A891	ESCA
A97I	ESCA
A49N	ESCA
A7WI	CESC
A8I0	ESCA
A2PK	CESC
5733	STAD
7954	LUAD
A5BD	CESC
A6JM	HNSC
A1YY	SKCM
A3WV	BLCA
A19K	SKCM
A48X	LUAD
A4R8	UCS
A69M	CESC
A2NE	SKCM
A18V	BRCA
A4MI	STAD
8536	STAD
A520	LIHC
A2A6	SKCM
A6L4	ESCA
A3EA	SKCM
6743	LUAD
4424	LUAD
A69X	BLCA
A2AE	UCEC
4370	STAD
A2EC	BLCA
A45W	HNSC
5779	LUAD
A2OH	SKCM
A4QM	STAD
A681	PCPG
A145	BRCA
A6W2	CESC
A7CJ	CESC
7046	KIRP
A0ZZ	UCEC
A8Q7	ESCA
A3LI	CESC
A12J	LIHC
A7K7	LIHC
A3JK	CESC
A1ZR	SKCM
8176	LUAD
A3RC	BLCA
A4GP	STAD
A2GJ	SKCM
A0VP	UCEC
A1Z4	SKCM
A0TA	UCEC
A0U7	UCEC
7897	PAAD
A5Z6	BLCA
7553	LUAD
A3CJ	LIHC
A0R8	UCEC
5978	HNSC
A0MT	UCEC
A39L	THCA
A212	UCEC
6879	PAAD
8674	LUAD
A73A	LIHC
7154	LUAD
4629	LUAD
6801	STAD
6691	LGG
A163	UCEC
7820	PRAD
A2KK	CESC
A2JN	SKCM
8078	STAD
A2H0	CESC
8506	LUAD
A4RM	UCS
7584	KIRP
8360	STAD
A4WC	UCS
A2LZ	CESC
A8RP	PAAD
A6DX	BLCA
4905	KIRC
A45Y	HNSC
4442	STAD
A2LV	CESC
A197	SKCM
A3SN	BLCA
A4F5	SKCM
6875	STAD
5931	LUAD
A3JD	SKCM
2662	LUAD
A1X3	SKCM
A7RB	ESCA
A3YB	ESCA
A1A1	SKCM
A2PG	CESC
A18B	UCEC
4362	STAD
6032	KIRC
A7J0	LGG
3615	LUAD
8059	STAD
A4BK	PAAD
A9TM	STAD
A7ZE	STAD
A4VN	LUAD
A61I	HNSC
A3VY	BLCA
A7PD	CESC
A14R	BRCA
A2MG	SKCM
A118	LIHC
A6C1	PAAD
A4NG	LIHC
A4NI	LIHC
A553	SKCM
8636	PAAD
A6TO	HNSC
A3MV	SKCM
A3QF	BLCA
A3WS	BLCA
A448	STAD
8166	LGG
A2RA	CESC
A49R	ESCA
A7XO	LIHC
A2EL	BLCA
A6MY	PCPG
A1EK	LIHC
A3IU	BLCA
A5EO	SKCM
4727	HNSC
A7J9	HNSC
7670	LUAD
8484	STAD
4455	STAD
4907	KIRC
A3JZ	BLCA
4410	LUAD
7196	STAD
A4Z0	STAD
4964	KIRC
6214	LUAD
A49L	ESCA
A20J	BLCA
A3IV	BLCA
6790	KIRP
A3DO	THCA
7051	KIRP
6836	LUAD
A5RF	LIHC
A4OJ	ESCA
5721	STAD
6362	PRAD
A6UO	HNSC
A2MT	SKCM
A7JS	HNSC
A6QY	SKCM
7871	HNSC
5629	HNSC
A6I1	BLCA
A5J3	ACC
AAQA	PAAD
A7CK	CESC
A51V	BLCA
4298	STAD
7714	LUAD
A4BE	STAD
A4Y8	UCS
A4N5	LUAD
6227	HNSC
7123	PRAD
8284	STAD
A7PZ	LIHC
A8NU	ESCA
A7R4	LGG
A41B	SKCM
A9FP	ESCA
A3QL	ESCA
A4EO	SKCM
8361	STAD
A29S	SKCM
A2JH	SKCM
A3HE	CESC
A5UJ	STAD
A8NR	ESCA
7669	LUAD
5799	STAD
7220	LUAD
A10Z	LIHC
A7II	LIHC
8081	STAD
A66S	HNSC
A2MP	SKCM
4666	LUAD
8363	STAD
5152	HNSC
A4QL	STAD
8621	LUAD
A2GS	SKCM
A3OQ	BLCA
A93F	ESCA
A75G	LIHC
4257	STAD
A4M0	LUAD
5921	PAAD
4514	LUAD
A1MH	CESC
5183	KIRC
A4CD	HNSC
A3JE	SKCM
8113	LGG
A52E	PRAD
A83F	PRAD
A78K	BLCA
A7UH	CESC
A4OH	ESCA
A7DR	PAAD
A88Y	ESCA
A45O	HNSC
8398	LUAD
A3JM	BLCA
A61G	HNSC
7081	PRAD
A41N	BLCA
A50L	ESCA
A3Z7	BLCA
A5KF	BLCA
A655	KIRP
A641	HNSC
AA6B	STAD
A741	CESC
A4J1	STAD
A62O	BLCA
A7HX	ESCA
A2RD	CESC
5522	PRAD
7593	HNSC
3777	KIRC
A5L2	ACC
A3PK	BLCA
A2KL	CESC
A0F1	BLCA
A6UF	PAAD
A1OC	CESC
A4YT	STAD
5765	PRAD
A3A5	LIHC
A766	BLCA
A2IP	CESC
A5SI	LIHC
A6VC	HNSC
8368	STAD
A3AF	SKCM
4272	STAD
A3XB	SKCM
8127	PAAD
7306	LGG
A1HR	BLCA
A5LB	ACC
A4WX	UCS
A8T8	ESCA
8315	PAAD
A2KB	LIHC
A3A2	LIHC
A167	UCEC
A4R1	UCS
Z049	LUAD
A8E7	STAD
A23B	LIHC
A3I8	ESCA
6135	KIRP
7611	LGG
4184	STAD
A8LH	PAAD
A7CH	CESC
7152	LUAD
6562	LUAD
A49K	ESCA
7155	LUAD
A3IN	BLCA
A6FS	SKCM
A8N6	STAD
7624	LUAD
A663	STAD
A8Y4	CHOL
7475	LGG
A4FC	SKCM
A8NL	ESCA
A7WQ	PCPG
8687	STAD
A4GQ	STAD
A3HF	CESC
8198	PRAD
A4EM	KIRP
A6I3	BLCA
A2LB	BLCA
A8FP	PRAD
A4OW	ESCA
A6L6	ESCA
4256	STAD
A5B8	ESCA
A4QT	ESCA
6690	LGG
7210	PRAD
A702	PCPG
A875	PRAD
7893	PAAD
6177	STAD
A3CM	THCA
A3AR	THCA
A2PW	THCA
A3GM	CESC
8528	STAD
6020	HNSC
5444	HNSC
A0EZ	BLCA
A5O9	CESC
A3D4	THCA
A9CJ	ESCA
A4A5	ESCA
A128	BRCA
A0VO	UCEC
A129	BRCA
A11V	UCEC
A11Z	UCEC
A0M8	UCEC
A0VT	UCEC
A0W2	UCEC
A0UL	UCEC
A0WQ	UCEC
A0ZR	UCEC
A0ZU	UCEC
A101	UCEC
A16B	UCEC
A16E	UCEC
A17D	UCEC
A17F	UCEC
A10B	BRCA
5919	PAAD
4986	KIRC
A9GM	ESCA
A8KF	UVM
AA2Q	CHOL
A43N	BLCA
4505	LUAD
A7CM	CESC
A6B2	BLCA
A3Z9	BLCA
A7OL	PAAD
A5EX	LGG
A652	HNSC
A6DW	CESC
A3LQ	CESC
A444	LUAD
7574	LUAD
1676	LUAD
A0GI	UCEC
A19G	SKCM
A1ZM	SKCM
A490	LUAD
7402	HNSC
A3WW	BLCA
A16F	UCEC
A7MA	LIHC
A4YI	LUAD
6775	LUAD
8192	LUAD
A65M	PRAD
A1NX	UCEC
5141	LGG
A4F9	SKCM
7597	STAD
A430	SKCM
A11G	UCEC
A5UN	SKCM
A11W	UCEC
5302	LGG
A7JF	HNSC
A6EG	SKCM
A3HY	CESC
1592	LUAD
A3F2	SKCM
A2EO	BLCA
8527	STAD
8005	PAAD
A6T3	HNSC
A2GK	SKCM
A0VR	CESC
A0VM	CESC
A4RA	UCS
A8EY	ESCA
7080	PRAD
A6EZ	STAD
A3FL	THCA
A186	UCEC
A07E	BRCA
A0VW	UCEC
7247	HNSC
A1BJ	CESC
A1JW	SKCM
5049	LUAD
A0JN	UCEC
4987	KIRC
A43C	ESCA
A9GQ	ESCA
A5KZ	ACC
A73E	LIHC
A7C1	STAD
A4RU	UCS
A7K2	LIHC
A7F5	PRAD
A0TQ	BRCA
A10A	BRCA
A143	BRCA
A8NF	ESCA
7437	HNSC
A6F8	ESCA
6188	LGG
A6FE	ESCA
A2RN	CESC
A0EO	BRCA
A06R	BRCA
A08Z	BRCA
A0YD	BRCA
A3I1	LIHC
A7WH	CESC
8501	HNSC
A2PC	BLCA
5965	LGG
7048	KIRP
A4TE	LUAD
A41P	BLCA
8679	STAD
4403	LUAD
A5RJ	BLCA
A677	BLCA
4280	STAD
AASX	ESCA
A15W	UCEC
A0TT	BRCA
A0RP	BRCA
A0SX	BRCA
A0T7	BRCA
A0SO	BRCA
A0SE	BRCA
A0ST	BRCA
A0T6	BRCA
A0GN	UCEC
A07G	BRCA
A0XS	BRCA
A0LG	UCEC
A0TS	BRCA
A0U0	BRCA
A1AN	BRCA
A05U	UCEC
A060	UCEC
A0J0	UCEC
A0K0	UCEC
A0I5	BRCA
A0I9	BRCA
A0IG	BRCA
A0M9	UCEC
A0MC	UCEC
A187	UCEC
A0HI	BRCA
A0TJ	UCEC
A12P	BRCA
5430	HNSC
A102	UCEC
A3GW	THCA
A2CJ	THCA
A2EX	UCEC
A2HF	UCEC
A0G5	UCEC
A0GB	UCEC
A0GV	UCEC
A0GW	UCEC
A0R7	UCEC
A097	BRCA
A0FK	BRCA
A12A	BRCA
A05P	UCEC
A0LJ	UCEC
A0LV	UCEC
A063	UCEC
A0K2	UCEC
A0IM	BRCA
A0LW	UCEC
A0YV	UCEC
A0HU	BRCA
A0YZ	THCA
A0CA	UCEC
A0CB	UCEC
A0TI	UCEC
A0UJ	UCEC
A0UT	UCEC
A12O	BRCA
5360	HNSC
5363	HNSC
A0ZV	UCEC
A16O	UCEC
A174	UCEC
A17B	UCEC
A17C	UCEC
A13Y	BRCA
A13M	THCA
A13R	THCA
A4UT	THCA
A3GS	THCA
A3ZN	THCA
A22Q	THCA
A2P1	THCA
A3AI	THCA
A2F8	UCEC
A0R6	UCEC
A07R	BRCA
A0JZ	UCEC
A11S	UCEC
A3GQ	THCA
A0I8	BRCA
AASV	ESCA
A4PF	STAD
A4VG	UCS
A1BK	CESC
AAAR	ESCA
A0W4	BRCA
A5OG	ACC
A938	ESCA
A1A3	BLCA
A7WF	CESC
A20O	BLCA
A6RI	STAD
A29A	SKCM
A29G	SKCM
7707	STAD
A6IN	PRAD
A177	UCEC
A0R9	UCEC
A116	LIHC
A0YO	BLCA
A112	LIHC
A6ET	STAD
Z053	LUAD
7031	LUAD
A0U5	UCEC
A5EV	LGG
A63Y	HNSC
7062	KIRP
A3GY	THCA
A6X2	HNSC
5611	LUAD
A88T	ESCA
7748	PRAD
A6UG	PAAD
A3UQ	THCA
A3O6	THCA
A49G	PAAD
A3AH	SKCM
A3KF	LIHC
A29W	SKCM
A8NI	ESCA
A9F0	UVM
A7SK	LIHC
A5K9	ACC
A5E6	KIRP
A0HN	BRCA
AA39	CHOL
Z042	LUAD
3444	KIRC
A2ES	BLCA
7948	LUAD
A65E	PRAD
A7SX	PAAD
A776	PAAD
A7CO	CESC
A9F7	UVM
A5JO	ACC
A39V	LIHC
A2JK	SKCM
4993	KIRC
A2LX	CESC
A8W5	ESCA
A781	LGG
A0U3	BRCA
A8P0	PAAD
A7B8	PAAD
A3O3	THCA
7978	LUAD
A40G	BLCA
4991	KIRC
A3R1	SKCM
8630	KIRP
A7YN	LGG
A19Q	SKCM
A6FB	ESCA
A7HD	PCPG
A40Y	KIRP
A4F4	SKCM
A2QG	CESC
A8Y1	CHOL
7399	HNSC
4631	LUAD
A3SO	BLCA
A4M3	LUAD
5778	LUAD
A0YK	BRCA
4191	STAD
A0IH	BRCA
A7CL	CESC
A1EC	LIHC
A105	BRCA
A0IB	BRCA
A4OX	ESCA
8507	LUAD
A77O	PAAD
A5JX	ACC
8631	STAD
A3C8	SKCM
7840	KIRP
AAZO	CHOL
A46Y	LUAD
A4P0	SKCM
A17M	UCEC
7053	KIRP
A1AR	BRCA
A0VZ	UCEC
A0W1	UCEC
A0AU	BRCA
A0HA	BRCA
A134	BRCA
A165	UCEC
A169	UCEC
A17L	UCEC
6985	LUAD
4438	STAD
A8QY	PRAD
A4LX	LUAD
A16Y	UCEC
A6K0	HNSC
A8NH	ESCA
A3JL	LIHC
A4DG	LUAD
A5NE	BLCA
A04W	BRCA
7907	LUAD
7570	LUAD
A1BC	BRCA
A10R	LIHC
A3QD	CESC
8399	LUAD
A4U1	BLCA
8028	LUAD
A3Z3	SKCM
A8NT	ESCA
A4AW	CESC
A0VK	CESC
6594	LUAD
A4CE	HNSC
A5BF	CESC
A8Y8	CHOL
5259	LIHC
5984	KIRC
A1YB	THCA
A93C	ESCA
A9GL	ESCA
7312	PRAD
A4GU	STAD
7043	LUAD
7781	PRAD
A9GJ	ESCA
A72U	LGG
A4U5	SKCM
A656	KIRP
A77E	PAAD
5185	KIRC
8279	LUAD
A7HU	CESC
7409	HNSC
A6TA	BLCA
5200	KIRC
A4FB	SKCM
A6MB	BLCA
A8NN	ESCA
A43I	ESCA
A49M	ESCA
A5XZ	KIRP
A0C9	UCEC
A8T6	ESCA
5899	LUAD
A44O	SKCM
A4JI	PRAD
A453	STAD
7661	LUAD
A6DT	CESC
5322	LGG
A4XA	LGG
A3CK	LIHC
A52C	PRAD
A5GU	SKCM
7298	LGG
A06Y	BRCA
Z014	LUAD
A6RE	ESCA
A88W	ESCA
A3YQ	CESC
8285	STAD
A29C	SKCM
A0M4	UCEC
A7M9	LIHC
8533	STAD
A4X2	UCS
A3B6	BLCA
A3CI	LIHC
A8KI	UVM
5881	KIRP
A81G	PCPG
A6DI	HNSC
A1A7	BLCA
A6RP	STAD
7662	LUAD
A47X	BLCA
A5HU	HNSC
A4YG	LUAD
8511	LUAD
4227	HNSC
4662	LUAD
A6V1	HNSC
A1YW	SKCM
A5K4	ACC
A61H	HNSC
A63U	HNSC
8033	LUAD
AA4G	ESCA
A7BO	ESCA
A9FR	ESCA
A0TR	BRCA
8442	KICH
8669	LUAD
8367	STAD
8164	LGG
A2HT	LIHC
7554	LUAD
A8EW	ESCA
4292	STAD
A237	THCA
A09Z	BRCA
8499	LUAD
A8ER	ESCA
A0SP	BRCA
A0SY	BRCA
A07U	BRCA
A0IC	BRCA
A0RS	BRCA
A0X0	BRCA
A0YU	UCEC
A0B0	BRCA
A0DH	BRCA
A0E9	BRCA
A0W5	BRCA
A147	BRCA
Z022	LUAD
A411	CESC
A49V	ESCA
5891	KIRP
AAQE	PAAD
8073	LUAD
A4TM	KIRP
8514	LUAD
A5VJ	CESC
A2HO	BLCA
A6ES	HNSC
A878	PRAD
5397	LGG
A6T5	HNSC
6968	LUAD
7479	LGG
6846	KIRP
5876	KIRP
A4BC	LUAD
A6M8	KIRP
4270	STAD
A44S	CESC
5754	PRAD
5428	LUAD
A7NT	STAD
6593	LUAD
A7LX	PAAD
A110	LIHC
A0IK	BRCA
A48D	KIRP
A4GH	STAD
6767	LUAD
A2JA	SKCM
A135	BRCA
A8O2	ESCA
6131	KIRP
A61P	BLCA
8588	STAD
A6QZ	SKCM
7760	LUAD
A707	PCPG
A465	HNSC
A6E5	PRAD
8615	LUAD
8203	LUAD
7884	LGG
8124	PAAD
A0B5	BRCA
A91U	STAD
8358	LUAD
A4DF	LUAD
A6G3	PRAD
A18N	BRCA
A0HF	BRCA
8094	LUAD
A3SL	BLCA
A0RN	BRCA
A52J	LUAD
A4XI	LIHC
A6RJ	STAD
A78R	CESC
5125	LUAD
A6TD	BLCA
7765	LUAD
A486	STAD
4617	KIRP
7644	PAAD
5199	KIRC
A7X3	CESC
A6EQ	HNSC
7478	LGG
A3Y9	ESCA
A1Q9	SKCM
A5K2	ACC
A5KV	ACC
A03P	BRCA
A39P	THCA
A694	SKCM
6011	HNSC
A62N	BLCA
A5J5	ACC
4441	STAD
A4U2	LIHC
8676	STAD
A6RR	STAD
A71D	HNSC
4190	STAD
5440	HNSC
5326	HNSC
A0IA	BRCA
A9IO	PAAD
8564	LGG
5098	KIRC
A7B7	LIHC
6774	LUAD
A04R	BRCA
7299	LGG
AA64	STAD
7567	LUAD
A3MA	LIHC
A6J3	LGG
A2GZ	CESC
AA8T	UVM
A2R9	CESC
A19S	SKCM
5835	KIRC
3311	KIRC
A1AJ	BRCA
A5KM	LGG
A0VN	CESC
A8I4	PRAD
6147	LUAD
A59E	UCS
A1F0	BRCA
A5DX	SKCM
7410	HNSC
A2OZ	THCA
A4AG	LUAD
A7GZ	HNSC
A5NN	UCS
A48Y	LUAD
AAUO	PAAD
A5SJ	LIHC
A748	STAD
A5RG	LIHC
A10Q	LIHC
A3A1	LIHC
A6KZ	ESCA
A6RN	STAD
2657	LUAD
6831	LUAD
A4TC	LUAD
A3J3	SKCM
5718	STAD
A6S8	LGG
A5W8	KIRP
[truncated: 3,455 more rows]

## Sheet: TCGA505_survival_samples
patient	cancer_type
TCGA-BL-A13J	BLCA
TCGA-BT-A20P	BLCA
TCGA-BT-A20Q	BLCA
TCGA-BT-A20T	BLCA
TCGA-BT-A20V	BLCA
TCGA-BT-A2LA	BLCA
TCGA-BT-A3PH	BLCA
TCGA-BT-A3PJ	BLCA
TCGA-CF-A27C	BLCA
TCGA-CF-A3MF	BLCA
TCGA-DK-A1A5	BLCA
TCGA-DK-A1A6	BLCA
TCGA-DK-A1AA	BLCA
TCGA-DK-A1AE	BLCA
TCGA-DK-A1AG	BLCA
TCGA-DK-A3IL	BLCA
TCGA-FD-A3N5	BLCA
TCGA-FD-A3N6	BLCA
TCGA-FT-A3EE	BLCA
TCGA-GD-A2C5	BLCA
TCGA-H4-A2HQ	BLCA
TCGA-A1-A0SM	BRCA
TCGA-A2-A04P	BRCA
TCGA-A2-A04Q	BRCA
TCGA-A2-A04T	BRCA
TCGA-A2-A04X	BRCA
TCGA-A2-A0CM	BRCA
TCGA-A2-A0D0	BRCA
TCGA-A2-A0D1	BRCA
TCGA-A2-A0D2	BRCA
TCGA-A2-A0D4	BRCA
TCGA-A2-A0EY	BRCA
TCGA-A2-A0YG	BRCA
TCGA-A2-A259	BRCA
TCGA-A2-A25B	BRCA
TCGA-A2-A3KC	BRCA
TCGA-A2-A3XX	BRCA
TCGA-A2-A3Y0	BRCA
TCGA-A7-A0CE	BRCA
TCGA-A7-A13D	BRCA
TCGA-A7-A26G	BRCA
TCGA-A8-A075	BRCA
TCGA-A8-A07B	BRCA
TCGA-A8-A07I	BRCA
TCGA-A8-A08B	BRCA
TCGA-A8-A08L	BRCA
TCGA-A8-A08S	BRCA
TCGA-A8-A092	BRCA
TCGA-A8-A094	BRCA
TCGA-A8-A09I	BRCA
TCGA-A8-A09X	BRCA
TCGA-AC-A2BK	BRCA
TCGA-AN-A04D	BRCA
TCGA-AN-A0AT	BRCA
TCGA-AN-A0XR	BRCA
TCGA-AO-A03L	BRCA
TCGA-AO-A03N	BRCA
TCGA-AO-A0J2	BRCA
TCGA-AO-A0J4	BRCA
TCGA-AO-A0J6	BRCA
TCGA-AO-A0JM	BRCA
TCGA-AO-A124	BRCA
TCGA-AO-A12H	BRCA
TCGA-AQ-A04J	BRCA
TCGA-AR-A0TX	BRCA
TCGA-AR-A1AY	BRCA
TCGA-AR-A24Z	BRCA
TCGA-AR-A256	BRCA
TCGA-AR-A2LK	BRCA
TCGA-B6-A0I1	BRCA
TCGA-B6-A0I2	BRCA
TCGA-B6-A0IJ	BRCA
TCGA-B6-A0IQ	BRCA
TCGA-B6-A0RE	BRCA
TCGA-B6-A0RT	BRCA
TCGA-B6-A0RU	BRCA
TCGA-B6-A0WX	BRCA
TCGA-BH-A0AV	BRCA
TCGA-BH-A0B3	BRCA
TCGA-BH-A0B9	BRCA
TCGA-BH-A0BW	BRCA
TCGA-BH-A0DG	BRCA
TCGA-BH-A0DT	BRCA
TCGA-BH-A0E0	BRCA
TCGA-BH-A0EA	BRCA
TCGA-BH-A0H0	BRCA
TCGA-BH-A0H6	BRCA
TCGA-BH-A0WA	BRCA
TCGA-BH-A18R	BRCA
TCGA-BH-A18U	BRCA
TCGA-BH-A1FC	BRCA
TCGA-C8-A12L	BRCA
TCGA-C8-A12Q	BRCA
TCGA-C8-A130	BRCA
TCGA-D8-A27F	BRCA
TCGA-D8-A27H	BRCA
TCGA-E2-A109	BRCA
TCGA-E2-A14P	BRCA
TCGA-E2-A14X	BRCA
TCGA-E2-A152	BRCA
TCGA-E2-A156	BRCA
TCGA-E2-A15E	BRCA
TCGA-E2-A15H	BRCA
TCGA-E2-A15K	BRCA
TCGA-E2-A1LG	BRCA
TCGA-E2-A1LK	BRCA
TCGA-E2-A1LL	BRCA
TCGA-E9-A1NH	BRCA
TCGA-EW-A1J5	BRCA
TCGA-EW-A1P8	BRCA
TCGA-EW-A1PB	BRCA
TCGA-EW-A1PC	BRCA
TCGA-EW-A1PH	BRCA
TCGA-EW-A3U0	BRCA
TCGA-GI-A2C9	BRCA
TCGA-GM-A2DF	BRCA
TCGA-GM-A3XL	BRCA
TCGA-A6-2680	COAD
TCGA-A6-2681	COAD
TCGA-A6-2683	COAD
TCGA-A6-3807	COAD
TCGA-A6-6141	COAD
TCGA-A6-6781	COAD
TCGA-AA-3514	COAD
TCGA-AA-3516	COAD
TCGA-AA-3518	COAD
TCGA-AA-3529	COAD
TCGA-AA-3534	COAD
TCGA-AA-3555	COAD
TCGA-AA-3664	COAD
TCGA-AA-3666	COAD
TCGA-AA-3956	COAD
TCGA-AA-3977	COAD
TCGA-AA-3994	COAD
TCGA-AA-A01R	COAD
TCGA-AA-A01S	COAD
TCGA-AA-A01T	COAD
TCGA-AA-A01V	COAD
TCGA-AA-A01X	COAD
TCGA-AA-A02O	COAD
TCGA-AA-A03F	COAD
TCGA-AD-6964	COAD
TCGA-AZ-6601	COAD
TCGA-CA-6717	COAD
TCGA-CA-6718	COAD
TCGA-02-2483	GBM
TCGA-02-2485	GBM
TCGA-06-0125	GBM
TCGA-06-0157	GBM
TCGA-06-0190	GBM
TCGA-06-0686	GBM
TCGA-06-0744	GBM
TCGA-06-0745	GBM
TCGA-06-2557	GBM
TCGA-06-2570	GBM
TCGA-06-5411	GBM
TCGA-06-5415	GBM
TCGA-14-1034	GBM
TCGA-14-1823	GBM
TCGA-14-2554	GBM
TCGA-15-1444	GBM
TCGA-19-2620	GBM
TCGA-19-2624	GBM
TCGA-19-2629	GBM
TCGA-19-5960	GBM
TCGA-26-5132	GBM
TCGA-26-5135	GBM
TCGA-27-1831	GBM
TCGA-27-2523	GBM
TCGA-27-2528	GBM
TCGA-32-1970	GBM
TCGA-41-5651	GBM
TCGA-BA-4076	HNSC
TCGA-BA-4077	HNSC
TCGA-BA-5153	HNSC
TCGA-BA-A4IH	HNSC
TCGA-CN-4737	HNSC
TCGA-CN-4741	HNSC
TCGA-CN-5365	HNSC
TCGA-CN-5374	HNSC
TCGA-CR-5249	HNSC
TCGA-CR-5250	HNSC
TCGA-CR-6467	HNSC
TCGA-CR-6470	HNSC
TCGA-CR-6472	HNSC
TCGA-CR-6480	HNSC
TCGA-CR-6482	HNSC
TCGA-CR-6487	HNSC
TCGA-CR-7385	HNSC
TCGA-CR-7404	HNSC
TCGA-CV-5442	HNSC
TCGA-CV-5443	HNSC
TCGA-CV-6433	HNSC
TCGA-CV-6961	HNSC
TCGA-CV-7090	HNSC
TCGA-CV-7100	HNSC
TCGA-CV-7180	HNSC
TCGA-CV-7255	HNSC
TCGA-CV-7416	HNSC
TCGA-KL-8323	KICH
TCGA-KL-8325	KICH
TCGA-KL-8341	KICH
TCGA-KL-8342	KICH
TCGA-KM-8440	KICH
TCGA-KN-8418	KICH
TCGA-KN-8424	KICH
TCGA-KN-8429	KICH
TCGA-KN-8434	KICH
TCGA-KN-8435	KICH
TCGA-KO-8406	KICH
TCGA-KO-8407	KICH
TCGA-KO-8411	KICH
TCGA-KO-8416	KICH
TCGA-KO-8417	KICH
TCGA-A3-3308	KIRC
TCGA-A3-3324	KIRC
TCGA-A3-3370	KIRC
TCGA-A3-3372	KIRC
TCGA-A3-3387	KIRC
TCGA-AK-3454	KIRC
TCGA-AK-3455	KIRC
TCGA-B0-5094	KIRC
TCGA-B0-5693	KIRC
TCGA-B2-4099	KIRC
TCGA-B2-4101	KIRC
TCGA-B2-4102	KIRC
TCGA-BP-4781	KIRC
TCGA-BP-4968	KIRC
TCGA-BP-4977	KIRC
TCGA-BP-5010	KIRC
TCGA-BP-5168	KIRC
TCGA-CJ-4639	KIRC
TCGA-CJ-4885	KIRC
TCGA-CJ-4899	KIRC
TCGA-CJ-4918	KIRC
TCGA-CJ-5682	KIRC
TCGA-CJ-6033	KIRC
TCGA-CW-6087	KIRC
TCGA-CW-6093	KIRC
TCGA-CZ-4856	KIRC
TCGA-CZ-5454	KIRC
TCGA-CZ-5987	KIRC
TCGA-DV-5566	KIRC
TCGA-CS-5395	LGG
TCGA-CS-6668	LGG
TCGA-CS-6669	LGG
TCGA-DB-5278	LGG
TCGA-DU-5874	LGG
TCGA-DU-6401	LGG
TCGA-DU-7009	LGG
TCGA-DU-7301	LGG
TCGA-E1-5318	LGG
TCGA-E1-5319	LGG
TCGA-EZ-7264	LGG
TCGA-FG-5964	LGG
TCGA-FG-8182	LGG
TCGA-HT-7602	LGG
TCGA-HT-7689	LGG
TCGA-HT-7695	LGG
TCGA-HW-7486	LGG
TCGA-HW-7487	LGG
TCGA-05-4389	LUAD
TCGA-05-4395	LUAD
TCGA-05-4396	LUAD
TCGA-05-4397	LUAD
TCGA-05-4398	LUAD
TCGA-05-4420	LUAD
TCGA-05-4422	LUAD
TCGA-05-4432	LUAD
TCGA-05-5429	LUAD
TCGA-38-4630	LUAD
TCGA-44-2659	LUAD
TCGA-44-2665	LUAD
TCGA-44-2666	LUAD
TCGA-44-6148	LUAD
TCGA-49-4486	LUAD
TCGA-49-4510	LUAD
TCGA-49-4512	LUAD
TCGA-49-6742	LUAD
TCGA-50-5066	LUAD
TCGA-50-5930	LUAD
TCGA-50-5932	LUAD
TCGA-50-6591	LUAD
TCGA-50-6597	LUAD
TCGA-55-1594	LUAD
TCGA-55-1596	LUAD
TCGA-55-6972	LUAD
TCGA-55-6982	LUAD
TCGA-55-6984	LUAD
TCGA-55-6986	LUAD
TCGA-55-7281	LUAD
TCGA-55-8299	LUAD
TCGA-64-1678	LUAD
TCGA-67-3771	LUAD
TCGA-67-3772	LUAD
TCGA-67-6215	LUAD
TCGA-73-4659	LUAD
TCGA-75-5147	LUAD
TCGA-78-7146	LUAD
TCGA-78-7156	LUAD
TCGA-78-7158	LUAD
TCGA-78-7535	LUAD
TCGA-91-6840	LUAD
TCGA-91-6847	LUAD
TCGA-97-8171	LUAD
TCGA-18-3408	LUSC
TCGA-18-3415	LUSC
TCGA-18-4721	LUSC
TCGA-21-1076	LUSC
TCGA-21-1078	LUSC
TCGA-21-1082	LUSC
TCGA-21-5782	LUSC
TCGA-22-1016	LUSC
TCGA-22-5477	LUSC
TCGA-22-5492	LUSC
TCGA-33-4586	LUSC
TCGA-34-2596	LUSC
TCGA-34-2600	LUSC
TCGA-34-5240	LUSC
TCGA-37-4135	LUSC
TCGA-43-3394	LUSC
TCGA-43-3920	LUSC
TCGA-43-5670	LUSC
TCGA-52-7812	LUSC
TCGA-56-1622	LUSC
TCGA-56-7582	LUSC
TCGA-60-2695	LUSC
TCGA-60-2698	LUSC
TCGA-60-2711	LUSC
TCGA-60-2713	LUSC
TCGA-60-2719	LUSC
TCGA-60-2722	LUSC
TCGA-60-2724	LUSC
TCGA-66-2744	LUSC
TCGA-66-2756	LUSC
TCGA-66-2757	LUSC
TCGA-66-2759	LUSC
TCGA-66-2766	LUSC
TCGA-66-2789	LUSC
TCGA-66-2793	LUSC
TCGA-66-2795	LUSC
TCGA-68-7755	LUSC
TCGA-68-8250	LUSC
TCGA-77-6843	LUSC
TCGA-77-7139	LUSC
TCGA-85-8277	LUSC
TCGA-92-8064	LUSC
TCGA-94-7943	LUSC
TCGA-96-7545	LUSC
TCGA-98-8022	LUSC
TCGA-CH-5750	PRAD
TCGA-CH-5763	PRAD
TCGA-CH-5771	PRAD
TCGA-CH-5788	PRAD
TCGA-CH-5789	PRAD
TCGA-EJ-5503	PRAD
TCGA-EJ-5506	PRAD
TCGA-EJ-7791	PRAD
TCGA-G9-6336	PRAD
TCGA-G9-6365	PRAD
TCGA-G9-6370	PRAD
TCGA-G9-7522	PRAD
TCGA-HC-7075	PRAD
TCGA-HC-7079	PRAD
TCGA-HC-7233	PRAD
TCGA-HC-7737	PRAD
TCGA-HC-7740	PRAD
TCGA-HC-7744	PRAD
TCGA-HC-8258	PRAD
TCGA-HI-7169	PRAD
TCGA-D3-A1Q1	SKCM
TCGA-D3-A1Q5	SKCM
TCGA-D3-A3MO	SKCM
TCGA-D9-A148	SKCM
TCGA-DA-A1HV	SKCM
TCGA-DA-A1HW	SKCM
TCGA-DA-A1HY	SKCM
TCGA-DA-A1I0	SKCM
TCGA-DA-A1I2	SKCM
TCGA-DA-A1I8	SKCM
TCGA-DA-A1IC	SKCM
TCGA-DA-A3F3	SKCM
TCGA-DA-A3F5	SKCM
TCGA-DA-A3F8	SKCM
TCGA-EE-A185	SKCM
TCGA-EE-A29B	SKCM
TCGA-EE-A2A0	SKCM
TCGA-EE-A2GN	SKCM
TCGA-EE-A2GT	SKCM
TCGA-EE-A2M5	SKCM
TCGA-EE-A2MI	SKCM
TCGA-EE-A3J5	SKCM
TCGA-EE-A3JI	SKCM
TCGA-ER-A19D	SKCM
TCGA-ER-A19E	SKCM
TCGA-ER-A19J	SKCM
TCGA-ER-A19L	SKCM
TCGA-ER-A19T	SKCM
TCGA-ER-A2NF	SKCM
TCGA-ER-A3ES	SKCM
TCGA-FS-A1ZD	SKCM
TCGA-FS-A1ZK	SKCM
TCGA-FS-A1ZP	SKCM
TCGA-FS-A1ZU	SKCM
TCGA-GN-A262	SKCM
TCGA-GN-A264	SKCM
TCGA-GN-A266	SKCM
TCGA-GN-A26A	SKCM
TCGA-BJ-A0Z2	THCA
TCGA-BJ-A0ZB	THCA
TCGA-BJ-A191	THCA
TCGA-BJ-A28T	THCA
TCGA-BJ-A28V	THCA
TCGA-DE-A0Y3	THCA
TCGA-DJ-A13W	THCA
TCGA-DJ-A1QL	THCA
TCGA-DJ-A2Q2	THCA
TCGA-DJ-A3US	THCA
TCGA-E8-A418	THCA
TCGA-EL-A3CV	THCA
TCGA-EL-A3CX	THCA
TCGA-EL-A3H1	THCA
TCGA-EL-A3MY	THCA
TCGA-EL-A3T0	THCA
TCGA-EL-A3TB	THCA
TCGA-EM-A22O	THCA
TCGA-EM-A2CN	THCA
TCGA-EM-A2CP	THCA
TCGA-EM-A2OV	THCA
TCGA-EM-A2OW	THCA
TCGA-EM-A3AL	THCA
TCGA-EM-A3AQ	THCA
TCGA-EM-A3FQ	THCA
TCGA-EM-A3FR	THCA
TCGA-ET-A3DV	THCA
TCGA-FE-A233	THCA
TCGA-FE-A3PD	THCA
TCGA-FK-A3S3	THCA
TCGA-FK-A3SD	THCA
TCGA-FK-A3SE	THCA
TCGA-FY-A2QD	THCA
TCGA-L6-A4ET	THCA
TCGA-A5-A0G9	UCEC
TCGA-A5-A0GA	UCEC
TCGA-A5-A0GE	UCEC
TCGA-A5-A0GG	UCEC
TCGA-A5-A0GJ	UCEC
TCGA-AJ-A23M	UCEC
TCGA-AP-A051	UCEC
TCGA-AP-A052	UCEC
TCGA-AP-A053	UCEC
TCGA-AP-A054	UCEC
TCGA-AP-A05A	UCEC
TCGA-AP-A05D	UCEC
TCGA-AP-A0L8	UCEC
TCGA-AP-A0L9	UCEC
TCGA-AP-A0LD	UCEC
TCGA-AP-A0LE	UCEC
TCGA-AP-A0LF	UCEC
TCGA-AP-A0LH	UCEC
TCGA-AP-A0LI	UCEC
TCGA-AP-A0LL	UCEC
TCGA-AP-A0LO	UCEC
TCGA-AX-A05S	UCEC
TCGA-AX-A06B	UCEC
TCGA-AX-A0J1	UCEC
TCGA-AX-A1C8	UCEC
TCGA-AX-A1CI	UCEC
TCGA-AX-A2H5	UCEC
TCGA-B5-A0K3	UCEC
TCGA-B5-A11H	UCEC
TCGA-B5-A11I	UCEC
TCGA-BG-A18C	UCEC
TCGA-BK-A0CC	UCEC
TCGA-BK-A139	UCEC
TCGA-BS-A0TC	UCEC
TCGA-BS-A0TD	UCEC
TCGA-BS-A0TE	UCEC
TCGA-BS-A0TG	UCEC
TCGA-BS-A0U9	UCEC
TCGA-BS-A0V8	UCEC
TCGA-D1-A16G	UCEC
TCGA-D1-A17K	UCEC
TCGA-D1-A1NU	UCEC
TCGA-DI-A1NN	UCEC
TCGA-E6-A1LZ	UCEC
TCGA-EO-A1Y8	UCEC
TCGA-EY-A1GS	UCEC
TCGA-EY-A1GW	UCEC

## Sheet: TCGAexome_survival_samples
patient	cancer_type
TCGA-OR-A5J1	ACC
TCGA-OR-A5J2	ACC
TCGA-OR-A5J3	ACC
TCGA-OR-A5J4	ACC
TCGA-OR-A5J5	ACC
TCGA-OR-A5J6	ACC
TCGA-OR-A5J7	ACC
TCGA-OR-A5J8	ACC
TCGA-OR-A5J9	ACC
TCGA-OR-A5JA	ACC
TCGA-OR-A5JB	ACC
TCGA-OR-A5JC	ACC
TCGA-OR-A5JD	ACC
TCGA-OR-A5JE	ACC
TCGA-OR-A5JF	ACC
TCGA-OR-A5JG	ACC
TCGA-OR-A5JH	ACC
TCGA-OR-A5JI	ACC
TCGA-OR-A5JJ	ACC
TCGA-OR-A5JK	ACC
TCGA-OR-A5JL	ACC
TCGA-OR-A5JM	ACC
TCGA-OR-A5JO	ACC
TCGA-OR-A5JP	ACC
TCGA-OR-A5JQ	ACC
TCGA-OR-A5JR	ACC
TCGA-OR-A5JS	ACC
TCGA-OR-A5JT	ACC
TCGA-OR-A5JU	ACC
TCGA-OR-A5JV	ACC
TCGA-OR-A5JW	ACC
TCGA-OR-A5JX	ACC
TCGA-OR-A5JY	ACC
TCGA-OR-A5JZ	ACC
TCGA-OR-A5K0	ACC
TCGA-OR-A5K1	ACC
TCGA-OR-A5K2	ACC
TCGA-OR-A5K3	ACC
TCGA-OR-A5K4	ACC
TCGA-OR-A5K5	ACC
TCGA-OR-A5K6	ACC
TCGA-OR-A5K8	ACC
TCGA-OR-A5K9	ACC
TCGA-OR-A5KB	ACC
TCGA-OR-A5KO	ACC
TCGA-OR-A5KP	ACC
TCGA-OR-A5KQ	ACC
TCGA-OR-A5KS	ACC
TCGA-OR-A5KT	ACC
TCGA-OR-A5KU	ACC
TCGA-OR-A5KV	ACC
TCGA-OR-A5KW	ACC
TCGA-OR-A5KX	ACC
TCGA-OR-A5KY	ACC
TCGA-OR-A5KZ	ACC
TCGA-OR-A5L1	ACC
TCGA-OR-A5L2	ACC
TCGA-OR-A5L3	ACC
TCGA-OR-A5L4	ACC
TCGA-OR-A5L5	ACC
TCGA-OR-A5L6	ACC
TCGA-OR-A5L8	ACC
TCGA-OR-A5L9	ACC
TCGA-OR-A5LA	ACC
TCGA-OR-A5LB	ACC
TCGA-OR-A5LC	ACC
TCGA-OR-A5LD	ACC
TCGA-OR-A5LE	ACC
TCGA-OR-A5LF	ACC
TCGA-OR-A5LG	ACC
TCGA-OR-A5LH	ACC
TCGA-OR-A5LI	ACC
TCGA-OR-A5LJ	ACC
TCGA-OR-A5LK	ACC
TCGA-OR-A5LL	ACC
TCGA-OR-A5LN	ACC
TCGA-OR-A5LO	ACC
TCGA-OR-A5LP	ACC
TCGA-OR-A5LR	ACC
TCGA-OR-A5LS	ACC
TCGA-OR-A5LT	ACC
TCGA-OU-A5PI	ACC
TCGA-P6-A5OF	ACC
TCGA-P6-A5OG	ACC
TCGA-P6-A5OH	ACC
TCGA-PA-A5YG	ACC
TCGA-PK-A5H8	ACC
TCGA-PK-A5H9	ACC
TCGA-PK-A5HA	ACC
TCGA-PK-A5HB	ACC
TCGA-PK-A5HC	ACC
TCGA-BL-A0C8	BLCA
TCGA-BL-A13I	BLCA
TCGA-BL-A3JM	BLCA
TCGA-BL-A5ZZ	BLCA
TCGA-BT-A0S7	BLCA
TCGA-BT-A0YX	BLCA
TCGA-BT-A20J	BLCA
TCGA-BT-A20N	BLCA
TCGA-BT-A20O	BLCA
TCGA-BT-A20R	BLCA
TCGA-BT-A20U	BLCA
TCGA-BT-A20W	BLCA
TCGA-BT-A20X	BLCA
TCGA-BT-A2LB	BLCA
TCGA-BT-A2LD	BLCA
TCGA-BT-A3PK	BLCA
TCGA-BT-A42B	BLCA
TCGA-BT-A42C	BLCA
TCGA-BT-A42E	BLCA
TCGA-BT-A42F	BLCA
TCGA-C4-A0EZ	BLCA
TCGA-C4-A0F0	BLCA
TCGA-C4-A0F1	BLCA
TCGA-C4-A0F6	BLCA
TCGA-C4-A0F7	BLCA
TCGA-CF-A1HR	BLCA
TCGA-CF-A1HS	BLCA
TCGA-CF-A3MG	BLCA
TCGA-CF-A3MH	BLCA
TCGA-CF-A3MI	BLCA
TCGA-CF-A47S	BLCA
TCGA-CF-A47T	BLCA
TCGA-CF-A47V	BLCA
TCGA-CF-A47W	BLCA
TCGA-CF-A47X	BLCA
TCGA-CF-A47Y	BLCA
TCGA-CF-A5U8	BLCA
TCGA-CF-A5UA	BLCA
TCGA-CU-A0YN	BLCA
TCGA-CU-A0YO	BLCA
TCGA-CU-A0YR	BLCA
TCGA-CU-A3KJ	BLCA
TCGA-CU-A3QU	BLCA
TCGA-CU-A3YL	BLCA
TCGA-CU-A5W6	BLCA
TCGA-CU-A72E	BLCA
TCGA-DK-A1A3	BLCA
TCGA-DK-A1A7	BLCA
TCGA-DK-A1AB	BLCA
TCGA-DK-A1AC	BLCA
TCGA-DK-A1AD	BLCA
TCGA-DK-A1AF	BLCA
TCGA-DK-A2HX	BLCA
TCGA-DK-A2I1	BLCA
TCGA-DK-A2I2	BLCA
TCGA-DK-A2I4	BLCA
TCGA-DK-A2I6	BLCA
TCGA-DK-A3IK	BLCA
TCGA-DK-A3IM	BLCA
TCGA-DK-A3IN	BLCA
TCGA-DK-A3IQ	BLCA
TCGA-DK-A3IS	BLCA
TCGA-DK-A3IT	BLCA
TCGA-DK-A3IU	BLCA
TCGA-DK-A3IV	BLCA
TCGA-DK-A3WW	BLCA
TCGA-DK-A3WX	BLCA
TCGA-DK-A3WY	BLCA
TCGA-DK-A3X1	BLCA
TCGA-DK-A3X2	BLCA
TCGA-DK-A6AV	BLCA
TCGA-DK-A6AW	BLCA
TCGA-DK-A6B0	BLCA
TCGA-DK-A6B1	BLCA
TCGA-DK-A6B2	BLCA
TCGA-DK-A6B5	BLCA
TCGA-DK-A6B6	BLCA
TCGA-E5-A2PC	BLCA
TCGA-E5-A4TZ	BLCA
TCGA-E5-A4U1	BLCA
TCGA-E7-A3X6	BLCA
TCGA-E7-A3Y1	BLCA
TCGA-E7-A4IJ	BLCA
TCGA-E7-A4XJ	BLCA
TCGA-E7-A519	BLCA
TCGA-E7-A541	BLCA
TCGA-E7-A5KE	BLCA
TCGA-E7-A5KF	BLCA
TCGA-E7-A677	BLCA
TCGA-E7-A678	BLCA
TCGA-E7-A6ME	BLCA
TCGA-E7-A6MF	BLCA
TCGA-E7-A7DU	BLCA
TCGA-E7-A7DV	BLCA
TCGA-FD-A3B3	BLCA
TCGA-FD-A3B4	BLCA
TCGA-FD-A3B5	BLCA
TCGA-FD-A3B6	BLCA
TCGA-FD-A3B7	BLCA
TCGA-FD-A3B8	BLCA
TCGA-FD-A3NA	BLCA
TCGA-FD-A3SJ	BLCA
TCGA-FD-A3SL	BLCA
TCGA-FD-A3SM	BLCA
TCGA-FD-A3SN	BLCA
TCGA-FD-A3SO	BLCA
TCGA-FD-A3SP	BLCA
TCGA-FD-A3SQ	BLCA
TCGA-FD-A3SR	BLCA
TCGA-FD-A3SS	BLCA
TCGA-FD-A43N	BLCA
TCGA-FD-A43P	BLCA
TCGA-FD-A43S	BLCA
TCGA-FD-A43U	BLCA
TCGA-FD-A43X	BLCA
TCGA-FD-A43Y	BLCA
TCGA-FD-A5BR	BLCA
TCGA-FD-A5BS	BLCA
TCGA-FD-A5BT	BLCA
TCGA-FD-A5BU	BLCA
TCGA-FD-A5BV	BLCA
TCGA-FD-A5BX	BLCA
TCGA-FD-A5BY	BLCA
TCGA-FD-A5BZ	BLCA
TCGA-FD-A5C0	BLCA
TCGA-FD-A5C1	BLCA
TCGA-FD-A62N	BLCA
TCGA-FD-A62O	BLCA
TCGA-FD-A62P	BLCA
TCGA-FD-A62S	BLCA
TCGA-FD-A6TA	BLCA
TCGA-FD-A6TB	BLCA
TCGA-FD-A6TC	BLCA
TCGA-FD-A6TD	BLCA
TCGA-FD-A6TE	BLCA
TCGA-FD-A6TF	BLCA
TCGA-FD-A6TG	BLCA
TCGA-FD-A6TH	BLCA
TCGA-FD-A6TI	BLCA
TCGA-FD-A6TK	BLCA
TCGA-FJ-A3Z7	BLCA
TCGA-FJ-A3Z9	BLCA
TCGA-FJ-A3ZE	BLCA
TCGA-FJ-A3ZF	BLCA
TCGA-FT-A61P	BLCA
TCGA-G2-A2EC	BLCA
TCGA-G2-A2EF	BLCA
TCGA-G2-A2EJ	BLCA
TCGA-G2-A2EK	BLCA
TCGA-G2-A2EL	BLCA
TCGA-G2-A2EO	BLCA
TCGA-G2-A2ES	BLCA
TCGA-G2-A3IB	BLCA
TCGA-G2-A3IE	BLCA
TCGA-G2-A3VY	BLCA
TCGA-GC-A3BM	BLCA
TCGA-GC-A3I6	BLCA
TCGA-GC-A3OO	BLCA
TCGA-GC-A3RB	BLCA
TCGA-GC-A3RC	BLCA
TCGA-GC-A3RD	BLCA
TCGA-GC-A3WC	BLCA
TCGA-GC-A3YS	BLCA
TCGA-GC-A4ZW	BLCA
TCGA-GC-A6I1	BLCA
TCGA-GC-A6I3	BLCA
TCGA-GD-A3OP	BLCA
TCGA-GD-A3OQ	BLCA
TCGA-GD-A3OS	BLCA
TCGA-GD-A6C6	BLCA
TCGA-GU-A42P	BLCA
TCGA-GU-A42Q	BLCA
TCGA-GU-A42R	BLCA
TCGA-GU-A762	BLCA
TCGA-GU-A763	BLCA
TCGA-GU-A766	BLCA
TCGA-GU-A767	BLCA
TCGA-GV-A3JV	BLCA
TCGA-GV-A3JW	BLCA
TCGA-GV-A3JX	BLCA
TCGA-GV-A3JZ	BLCA
TCGA-GV-A3QF	BLCA
TCGA-GV-A3QH	BLCA
TCGA-GV-A3QI	BLCA
TCGA-GV-A3QK	BLCA
TCGA-GV-A40E	BLCA
TCGA-GV-A40G	BLCA
TCGA-GV-A6ZA	BLCA
TCGA-H4-A2HO	BLCA
TCGA-HQ-A2OE	BLCA
TCGA-HQ-A2OF	BLCA
TCGA-HQ-A5ND	BLCA
TCGA-HQ-A5NE	BLCA
TCGA-K4-A3WS	BLCA
TCGA-K4-A3WU	BLCA
TCGA-K4-A3WV	BLCA
TCGA-K4-A4AB	BLCA
TCGA-K4-A4AC	BLCA
TCGA-K4-A54R	BLCA
TCGA-K4-A5RH	BLCA
TCGA-K4-A5RI	BLCA
TCGA-K4-A5RJ	BLCA
TCGA-K4-A6FZ	BLCA
TCGA-K4-A6MB	BLCA
TCGA-KQ-A41N	BLCA
TCGA-KQ-A41P	BLCA
TCGA-KQ-A41Q	BLCA
TCGA-KQ-A41S	BLCA
TCGA-LC-A66R	BLCA
TCGA-LT-A5Z6	BLCA
TCGA-MV-A51V	BLCA
TCGA-PQ-A6FI	BLCA
TCGA-PQ-A6FN	BLCA
TCGA-R3-A69X	BLCA
TCGA-S5-A6DX	BLCA
TCGA-UY-A78K	BLCA
TCGA-UY-A78L	BLCA
TCGA-UY-A78N	BLCA
TCGA-UY-A78O	BLCA
TCGA-A1-A0SD	BRCA
TCGA-A1-A0SE	BRCA
TCGA-A1-A0SH	BRCA
TCGA-A1-A0SJ	BRCA
TCGA-A1-A0SK	BRCA
TCGA-A1-A0SO	BRCA
TCGA-A1-A0SP	BRCA
TCGA-A2-A04N	BRCA
TCGA-A2-A04R	BRCA
TCGA-A2-A04U	BRCA
TCGA-A2-A04V	BRCA
TCGA-A2-A04W	BRCA
TCGA-A2-A04Y	BRCA
TCGA-A2-A0CL	BRCA
TCGA-A2-A0CP	BRCA
TCGA-A2-A0CQ	BRCA
TCGA-A2-A0CS	BRCA
TCGA-A2-A0CT	BRCA
TCGA-A2-A0CU	BRCA
TCGA-A2-A0CV	BRCA
TCGA-A2-A0CW	BRCA
TCGA-A2-A0CX	BRCA
TCGA-A2-A0CZ	BRCA
TCGA-A2-A0D3	BRCA
TCGA-A2-A0EM	BRCA
TCGA-A2-A0EN	BRCA
TCGA-A2-A0EO	BRCA
TCGA-A2-A0EQ	BRCA
TCGA-A2-A0ER	BRCA
TCGA-A2-A0ES	BRCA
TCGA-A2-A0ET	BRCA
TCGA-A2-A0EU	BRCA
TCGA-A2-A0EV	BRCA
TCGA-A2-A0EW	BRCA
TCGA-A2-A0EX	BRCA
TCGA-A2-A0ST	BRCA
TCGA-A2-A0SU	BRCA
TCGA-A2-A0SV	BRCA
TCGA-A2-A0SW	BRCA
TCGA-A2-A0SX	BRCA
TCGA-A2-A0SY	BRCA
TCGA-A2-A0T0	BRCA
TCGA-A2-A0T1	BRCA
TCGA-A2-A0T2	BRCA
TCGA-A2-A0T3	BRCA
TCGA-A2-A0T4	BRCA
TCGA-A2-A0T5	BRCA
TCGA-A2-A0T6	BRCA
TCGA-A2-A0T7	BRCA
TCGA-A2-A0YC	BRCA
TCGA-A2-A0YD	BRCA
TCGA-A2-A0YF	BRCA
TCGA-A2-A0YH	BRCA
TCGA-A2-A0YI	BRCA
TCGA-A2-A0YJ	BRCA
TCGA-A2-A0YK	BRCA
TCGA-A2-A0YL	BRCA
TCGA-A2-A0YM	BRCA
TCGA-A2-A0YT	BRCA
TCGA-A7-A0CD	BRCA
TCGA-A7-A0CG	BRCA
TCGA-A7-A0CH	BRCA
TCGA-A7-A0CJ	BRCA
TCGA-A7-A0D9	BRCA
TCGA-A7-A0DA	BRCA
TCGA-A7-A0DB	BRCA
TCGA-A7-A13F	BRCA
TCGA-A8-A06N	BRCA
TCGA-A8-A06O	BRCA
TCGA-A8-A06P	BRCA
TCGA-A8-A06Q	BRCA
TCGA-A8-A06R	BRCA
TCGA-A8-A06T	BRCA
TCGA-A8-A06U	BRCA
TCGA-A8-A06X	BRCA
TCGA-A8-A06Y	BRCA
TCGA-A8-A06Z	BRCA
TCGA-A8-A076	BRCA
TCGA-A8-A079	BRCA
TCGA-A8-A07C	BRCA
TCGA-A8-A07E	BRCA
TCGA-A8-A07F	BRCA
TCGA-A8-A07G	BRCA
TCGA-A8-A07J	BRCA
TCGA-A8-A07L	BRCA
TCGA-A8-A07O	BRCA
TCGA-A8-A07P	BRCA
TCGA-A8-A07R	BRCA
TCGA-A8-A07U	BRCA
TCGA-A8-A07W	BRCA
TCGA-A8-A07Z	BRCA
TCGA-A8-A081	BRCA
TCGA-A8-A082	BRCA
TCGA-A8-A083	BRCA
TCGA-A8-A084	BRCA
TCGA-A8-A085	BRCA
TCGA-A8-A086	BRCA
TCGA-A8-A08A	BRCA
TCGA-A8-A08C	BRCA
TCGA-A8-A08F	BRCA
TCGA-A8-A08G	BRCA
TCGA-A8-A08H	BRCA
TCGA-A8-A08I	BRCA
TCGA-A8-A08J	BRCA
TCGA-A8-A08O	BRCA
TCGA-A8-A08P	BRCA
TCGA-A8-A08R	BRCA
TCGA-A8-A08T	BRCA
TCGA-A8-A08X	BRCA
TCGA-A8-A08Z	BRCA
TCGA-A8-A090	BRCA
TCGA-A8-A091	BRCA
TCGA-A8-A093	BRCA
TCGA-A8-A095	BRCA
TCGA-A8-A096	BRCA
TCGA-A8-A097	BRCA
TCGA-A8-A099	BRCA
TCGA-A8-A09A	BRCA
TCGA-A8-A09B	BRCA
TCGA-A8-A09C	BRCA
TCGA-A8-A09D	BRCA
TCGA-A8-A09E	BRCA
TCGA-A8-A09G	BRCA
TCGA-A8-A09K	BRCA
TCGA-A8-A09M	BRCA
TCGA-A8-A09N	BRCA
TCGA-A8-A09Q	BRCA
TCGA-A8-A09R	BRCA
TCGA-A8-A09T	BRCA
TCGA-A8-A09V	BRCA
TCGA-A8-A09W	BRCA
TCGA-A8-A09Z	BRCA
TCGA-A8-A0A1	BRCA
TCGA-A8-A0A2	BRCA
TCGA-A8-A0A4	BRCA
TCGA-A8-A0A6	BRCA
TCGA-A8-A0A7	BRCA
TCGA-A8-A0A9	BRCA
TCGA-A8-A0AB	BRCA
TCGA-A8-A0AD	BRCA
TCGA-AN-A03X	BRCA
TCGA-AN-A03Y	BRCA
TCGA-AN-A041	BRCA
TCGA-AN-A049	BRCA
TCGA-AN-A04A	BRCA
TCGA-AN-A04C	BRCA
TCGA-AN-A0AJ	BRCA
TCGA-AN-A0AK	BRCA
TCGA-AN-A0AL	BRCA
TCGA-AN-A0AM	BRCA
TCGA-AN-A0AR	BRCA
TCGA-AN-A0AS	BRCA
TCGA-AN-A0FD	BRCA
TCGA-AN-A0FF	BRCA
TCGA-AN-A0FJ	BRCA
TCGA-AN-A0FK	BRCA
TCGA-AN-A0FL	BRCA
TCGA-AN-A0FN	BRCA
TCGA-AN-A0FS	BRCA
TCGA-AN-A0FT	BRCA
TCGA-AN-A0FV	BRCA
TCGA-AN-A0FW	BRCA
TCGA-AN-A0FX	BRCA
TCGA-AN-A0FY	BRCA
TCGA-AN-A0FZ	BRCA
TCGA-AN-A0G0	BRCA
TCGA-AN-A0XL	BRCA
TCGA-AN-A0XN	BRCA
TCGA-AN-A0XO	BRCA
TCGA-AN-A0XP	BRCA
TCGA-AN-A0XS	BRCA
TCGA-AN-A0XT	BRCA
TCGA-AN-A0XU	BRCA
TCGA-AN-A0XV	BRCA
TCGA-AN-A0XW	BRCA
TCGA-AO-A03M	BRCA
TCGA-AO-A03O	BRCA
TCGA-AO-A03P	BRCA
TCGA-AO-A03R	BRCA
TCGA-AO-A03T	BRCA
TCGA-AO-A03U	BRCA
TCGA-AO-A03V	BRCA
TCGA-AO-A0J3	BRCA
TCGA-AO-A0J5	BRCA
TCGA-AO-A0J7	BRCA
TCGA-AO-A0J8	BRCA
TCGA-AO-A0J9	BRCA
TCGA-AO-A0JA	BRCA
TCGA-AO-A0JB	BRCA
TCGA-AO-A0JC	BRCA
TCGA-AO-A0JD	BRCA
TCGA-AO-A0JE	BRCA
TCGA-AO-A0JF	BRCA
TCGA-AO-A0JG	BRCA
TCGA-AO-A0JI	BRCA
TCGA-AO-A0JJ	BRCA
TCGA-AO-A0JL	BRCA
TCGA-AO-A125	BRCA
TCGA-AO-A126	BRCA
TCGA-AO-A128	BRCA
TCGA-AO-A129	BRCA
TCGA-AO-A12A	BRCA
TCGA-AO-A12B	BRCA
TCGA-AO-A12D	BRCA
TCGA-AO-A12E	BRCA
TCGA-AO-A12F	BRCA
TCGA-AO-A12G	BRCA
TCGA-AQ-A04H	BRCA
TCGA-AQ-A04L	BRCA
TCGA-AR-A0TP	BRCA
TCGA-AR-A0TQ	BRCA
TCGA-AR-A0TR	BRCA
TCGA-AR-A0TS	BRCA
TCGA-AR-A0TT	BRCA
TCGA-AR-A0TU	BRCA
TCGA-AR-A0TV	BRCA
TCGA-AR-A0TW	BRCA
TCGA-AR-A0TY	BRCA
TCGA-AR-A0TZ	BRCA
TCGA-AR-A0U0	BRCA
TCGA-AR-A0U1	BRCA
TCGA-AR-A0U2	BRCA
TCGA-AR-A0U3	BRCA
TCGA-AR-A0U4	BRCA
TCGA-AR-A1AH	BRCA
TCGA-AR-A1AI	BRCA
TCGA-AR-A1AJ	BRCA
TCGA-AR-A1AK	BRCA
TCGA-AR-A1AL	BRCA
TCGA-AR-A1AN	BRCA
TCGA-AR-A1AO	BRCA
TCGA-AR-A1AP	BRCA
TCGA-AR-A1AQ	BRCA
TCGA-AR-A1AR	BRCA
TCGA-AR-A1AS	BRCA
TCGA-AR-A1AT	BRCA
TCGA-AR-A1AU	BRCA
TCGA-AR-A1AV	BRCA
TCGA-AR-A1AW	BRCA
TCGA-AR-A1AX	BRCA
TCGA-B6-A0I5	BRCA
TCGA-B6-A0I6	BRCA
TCGA-B6-A0I8	BRCA
TCGA-B6-A0I9	BRCA
TCGA-B6-A0IA	BRCA
TCGA-B6-A0IB	BRCA
TCGA-B6-A0IC	BRCA
TCGA-B6-A0IE	BRCA
TCGA-B6-A0IG	BRCA
TCGA-B6-A0IH	BRCA
TCGA-B6-A0IK	BRCA
TCGA-B6-A0IM	BRCA
TCGA-B6-A0IN	BRCA
TCGA-B6-A0IO	BRCA
TCGA-B6-A0IP	BRCA
TCGA-B6-A0RG	BRCA
TCGA-B6-A0RH	BRCA
TCGA-B6-A0RI	BRCA
TCGA-B6-A0RL	BRCA
TCGA-B6-A0RM	BRCA
TCGA-B6-A0RN	BRCA
TCGA-B6-A0RO	BRCA
TCGA-B6-A0RP	BRCA
TCGA-B6-A0RQ	BRCA
TCGA-B6-A0RS	BRCA
TCGA-B6-A0RV	BRCA
TCGA-B6-A0WS	BRCA
TCGA-B6-A0WT	BRCA
TCGA-B6-A0WV	BRCA
TCGA-B6-A0WW	BRCA
TCGA-B6-A0WY	BRCA
TCGA-B6-A0WZ	BRCA
TCGA-B6-A0X0	BRCA
TCGA-B6-A0X1	BRCA
TCGA-B6-A0X4	BRCA
TCGA-B6-A0X5	BRCA
TCGA-B6-A0X7	BRCA
TCGA-BH-A0AU	BRCA
TCGA-BH-A0AW	BRCA
TCGA-BH-A0AY	BRCA
TCGA-BH-A0AZ	BRCA
TCGA-BH-A0B0	BRCA
TCGA-BH-A0B1	BRCA
TCGA-BH-A0B4	BRCA
TCGA-BH-A0B5	BRCA
TCGA-BH-A0B7	BRCA
TCGA-BH-A0B8	BRCA
TCGA-BH-A0BA	BRCA
TCGA-BH-A0BC	BRCA
TCGA-BH-A0BD	BRCA
TCGA-BH-A0BF	BRCA
TCGA-BH-A0BG	BRCA
TCGA-BH-A0BJ	BRCA
TCGA-BH-A0BL	BRCA
TCGA-BH-A0BM	BRCA
TCGA-BH-A0BO	BRCA
TCGA-BH-A0BP	BRCA
TCGA-BH-A0BQ	BRCA
TCGA-BH-A0BR	BRCA
TCGA-BH-A0BS	BRCA
TCGA-BH-A0BT	BRCA
TCGA-BH-A0BV	BRCA
TCGA-BH-A0BZ	BRCA
TCGA-BH-A0C0	BRCA
TCGA-BH-A0C1	BRCA
TCGA-BH-A0C3	BRCA
TCGA-BH-A0C7	BRCA
TCGA-BH-A0DD	BRCA
TCGA-BH-A0DE	BRCA
TCGA-BH-A0DH	BRCA
TCGA-BH-A0DI	BRCA
TCGA-BH-A0DK	BRCA
TCGA-BH-A0DL	BRCA
TCGA-BH-A0DO	BRCA
TCGA-BH-A0DP	BRCA
TCGA-BH-A0DQ	BRCA
TCGA-BH-A0DS	BRCA
TCGA-BH-A0DV	BRCA
TCGA-BH-A0DX	BRCA
TCGA-BH-A0DZ	BRCA
TCGA-BH-A0E1	BRCA
TCGA-BH-A0E2	BRCA
TCGA-BH-A0E6	BRCA
TCGA-BH-A0E7	BRCA
TCGA-BH-A0E9	BRCA
TCGA-BH-A0EB	BRCA
TCGA-BH-A0EE	BRCA
TCGA-BH-A0EI	BRCA
TCGA-BH-A0GY	BRCA
TCGA-BH-A0GZ	BRCA
TCGA-BH-A0H3	BRCA
TCGA-BH-A0H5	BRCA
TCGA-BH-A0H7	BRCA
TCGA-BH-A0H9	BRCA
TCGA-BH-A0HA	BRCA
TCGA-BH-A0HB	BRCA
TCGA-BH-A0HF	BRCA
TCGA-BH-A0HI	BRCA
TCGA-BH-A0HK	BRCA
TCGA-BH-A0HL	BRCA
TCGA-BH-A0HN	BRCA
TCGA-BH-A0HO	BRCA
TCGA-BH-A0HP	BRCA
TCGA-BH-A0HQ	BRCA
TCGA-BH-A0HU	BRCA
TCGA-BH-A0HW	BRCA
TCGA-BH-A0HX	BRCA
TCGA-BH-A0HY	BRCA
TCGA-BH-A0RX	BRCA
TCGA-BH-A0W3	BRCA
TCGA-BH-A0W4	BRCA
TCGA-BH-A0W5	BRCA
TCGA-BH-A0W7	BRCA
TCGA-BH-A18F	BRCA
TCGA-BH-A18G	BRCA
TCGA-BH-A18H	BRCA
TCGA-BH-A18I	BRCA
TCGA-BH-A18J	BRCA
TCGA-BH-A18K	BRCA
TCGA-BH-A18L	BRCA
TCGA-BH-A18M	BRCA
TCGA-BH-A18N	BRCA
TCGA-BH-A18P	BRCA
TCGA-BH-A18Q	BRCA
TCGA-BH-A18S	BRCA
TCGA-BH-A18T	BRCA
TCGA-BH-A18V	BRCA
TCGA-BH-A1EO	BRCA
TCGA-BH-A1ES	BRCA
TCGA-BH-A1ET	BRCA
TCGA-BH-A1EU	BRCA
TCGA-BH-A1EV	BRCA
TCGA-BH-A1EW	BRCA
TCGA-BH-A1F0	BRCA
TCGA-C8-A12K	BRCA
TCGA-C8-A12M	BRCA
TCGA-C8-A12N	BRCA
TCGA-C8-A12O	BRCA
TCGA-C8-A12P	BRCA
TCGA-C8-A12T	BRCA
TCGA-C8-A12U	BRCA
TCGA-C8-A12V	BRCA
TCGA-C8-A12W	BRCA
TCGA-C8-A12X	BRCA
TCGA-C8-A12Y	BRCA
TCGA-C8-A12Z	BRCA
TCGA-C8-A131	BRCA
TCGA-C8-A132	BRCA
TCGA-C8-A133	BRCA
TCGA-C8-A134	BRCA
TCGA-C8-A135	BRCA
TCGA-C8-A137	BRCA
TCGA-C8-A138	BRCA
TCGA-C8-A1HF	BRCA
TCGA-C8-A1HG	BRCA
TCGA-C8-A1HI	BRCA
TCGA-C8-A1HL	BRCA
TCGA-C8-A1HM	BRCA
TCGA-C8-A1HN	BRCA
TCGA-D8-A13Y	BRCA
TCGA-D8-A13Z	BRCA
TCGA-D8-A140	BRCA
TCGA-D8-A141	BRCA
TCGA-D8-A142	BRCA
TCGA-D8-A143	BRCA
TCGA-D8-A145	BRCA
TCGA-D8-A146	BRCA
TCGA-D8-A147	BRCA
TCGA-E2-A105	BRCA
TCGA-E2-A107	BRCA
TCGA-E2-A108	BRCA
TCGA-E2-A10A	BRCA
TCGA-E2-A10B	BRCA
TCGA-E2-A10C	BRCA
TCGA-E2-A10E	BRCA
TCGA-E2-A10F	BRCA
TCGA-E2-A14N	BRCA
TCGA-E2-A14O	BRCA
TCGA-E2-A14Q	BRCA
TCGA-E2-A14R	BRCA
TCGA-E2-A14S	BRCA
TCGA-E2-A14T	BRCA
TCGA-E2-A14V	BRCA
TCGA-E2-A14W	BRCA
TCGA-E2-A14Y	BRCA
TCGA-E2-A14Z	BRCA
TCGA-E2-A150	BRCA
TCGA-E2-A153	BRCA
TCGA-E2-A154	BRCA
TCGA-E2-A155	BRCA
TCGA-E2-A158	BRCA
TCGA-E2-A159	BRCA
TCGA-E2-A15A	BRCA
TCGA-E2-A15C	BRCA
TCGA-E2-A15F	BRCA
TCGA-E2-A15G	BRCA
TCGA-E2-A15I	BRCA
TCGA-E2-A15J	BRCA
TCGA-E2-A15L	BRCA
TCGA-E2-A15M	BRCA
TCGA-E2-A15O	BRCA
TCGA-E2-A15P	BRCA
TCGA-E2-A15R	BRCA
TCGA-E2-A15S	BRCA
TCGA-E2-A15T	BRCA
TCGA-E2-A1AZ	BRCA
TCGA-E2-A1B0	BRCA
TCGA-E2-A1B1	BRCA
TCGA-E2-A1B4	BRCA
TCGA-E2-A1B5	BRCA
TCGA-E2-A1B6	BRCA
TCGA-E2-A1BC	BRCA
TCGA-E2-A1BD	BRCA
TCGA-BI-A0VR	CESC
TCGA-BI-A0VS	CESC
TCGA-BI-A20A	CESC
TCGA-C5-A0TN	CESC
TCGA-C5-A1BE	CESC
TCGA-C5-A1BF	CESC
TCGA-C5-A1BI	CESC
TCGA-C5-A1BJ	CESC
TCGA-C5-A1BK	CESC
TCGA-C5-A1BL	CESC
TCGA-C5-A1BM	CESC
TCGA-C5-A1BN	CESC
TCGA-C5-A1BQ	CESC
TCGA-C5-A1M5	CESC
TCGA-C5-A1M6	CESC
TCGA-C5-A1M7	CESC
TCGA-C5-A1M8	CESC
TCGA-C5-A1M9	CESC
TCGA-C5-A1ME	CESC
TCGA-C5-A1MF	CESC
TCGA-C5-A1MH	CESC
TCGA-C5-A1MI	CESC
TCGA-C5-A1MJ	CESC
TCGA-C5-A1MK	CESC
TCGA-C5-A1ML	CESC
TCGA-C5-A1MN	CESC
TCGA-C5-A1MP	CESC
TCGA-C5-A1MQ	CESC
TCGA-C5-A2LS	CESC
TCGA-C5-A2LT	CESC
TCGA-C5-A2LV	CESC
TCGA-C5-A2LX	CESC
TCGA-C5-A2LY	CESC
TCGA-C5-A2LZ	CESC
TCGA-C5-A2M1	CESC
TCGA-C5-A2M2	CESC
TCGA-C5-A3HD	CESC
TCGA-C5-A3HE	CESC
TCGA-C5-A3HF	CESC
TCGA-C5-A3HL	CESC
TCGA-C5-A7CG	CESC
TCGA-C5-A7CH	CESC
TCGA-C5-A7CJ	CESC
TCGA-C5-A7CK	CESC
TCGA-C5-A7CL	CESC
TCGA-C5-A7CM	CESC
TCGA-C5-A7CO	CESC
TCGA-C5-A7UC	CESC
TCGA-C5-A7UE	CESC
TCGA-C5-A7UH	CESC
TCGA-C5-A7X3	CESC
TCGA-DG-A2KH	CESC
TCGA-DG-A2KJ	CESC
TCGA-DG-A2KK	CESC
TCGA-DG-A2KL	CESC
TCGA-DG-A2KM	CESC
TCGA-DR-A0ZL	CESC
TCGA-DR-A0ZM	CESC
TCGA-DS-A0VK	CESC
TCGA-DS-A0VL	CESC
TCGA-DS-A0VM	CESC
TCGA-DS-A0VN	CESC
TCGA-DS-A1OA	CESC
TCGA-DS-A1OB	CESC
TCGA-DS-A1OC	CESC
TCGA-DS-A1OD	CESC
TCGA-DS-A3LQ	CESC
TCGA-DS-A5RQ	CESC
TCGA-DS-A7WF	CESC
TCGA-DS-A7WH	CESC
TCGA-DS-A7WI	CESC
TCGA-EA-A1QS	CESC
TCGA-EA-A1QT	CESC
TCGA-EA-A3HQ	CESC
TCGA-EA-A3HR	CESC
TCGA-EA-A3HS	CESC
TCGA-EA-A3HT	CESC
TCGA-EA-A3HU	CESC
TCGA-EA-A3QD	CESC
TCGA-EA-A3QE	CESC
TCGA-EA-A3Y4	CESC
TCGA-EA-A410	CESC
TCGA-EA-A411	CESC
TCGA-EA-A439	CESC
TCGA-EA-A43B	CESC
TCGA-EA-A44S	CESC
TCGA-EA-A4BA	CESC
TCGA-EA-A50E	CESC
TCGA-EA-A556	CESC
TCGA-EA-A5FO	CESC
TCGA-EA-A5O9	CESC
TCGA-EA-A5ZD	CESC
TCGA-EA-A5ZE	CESC
TCGA-EA-A5ZF	CESC
TCGA-EA-A6QX	CESC
TCGA-EA-A78R	CESC
TCGA-EK-A2GZ	CESC
TCGA-EK-A2H0	CESC
TCGA-EK-A2H1	CESC
TCGA-EK-A2IP	CESC
TCGA-EK-A2PG	CESC
TCGA-EK-A2PI	CESC
TCGA-EK-A2PK	CESC
TCGA-EK-A2PL	CESC
TCGA-EK-A2PM	CESC
TCGA-EK-A2R7	CESC
TCGA-EK-A2R8	CESC
TCGA-EK-A2R9	CESC
TCGA-EK-A2RA	CESC
TCGA-EK-A2RB	CESC
TCGA-EK-A2RC	CESC
TCGA-EK-A2RD	CESC
TCGA-EK-A2RE	CESC
TCGA-EK-A2RJ	CESC
TCGA-EK-A2RK	CESC
TCGA-EK-A2RL	CESC
TCGA-EK-A2RM	CESC
TCGA-EK-A2RN	CESC
TCGA-EK-A2RO	CESC
TCGA-EK-A3GJ	CESC
TCGA-EK-A3GK	CESC
TCGA-EK-A3GM	CESC
TCGA-EK-A3GN	CESC
TCGA-EX-A1H5	CESC
TCGA-EX-A1H6	CESC
TCGA-EX-A3L1	CESC
TCGA-EX-A449	CESC
TCGA-EX-A69L	CESC
TCGA-EX-A69M	CESC
TCGA-FU-A23K	CESC
TCGA-FU-A23L	CESC
TCGA-FU-A2QG	CESC
TCGA-FU-A3EO	CESC
TCGA-FU-A3HY	CESC
TCGA-FU-A3HZ	CESC
TCGA-FU-A3NI	CESC
TCGA-FU-A3TQ	CESC
TCGA-FU-A3TX	CESC
TCGA-FU-A3WB	CESC
TCGA-FU-A3YQ	CESC
TCGA-FU-A40J	CESC
TCGA-FU-A57G	CESC
TCGA-FU-A5XV	CESC
TCGA-FU-A770	CESC
TCGA-HG-A2PA	CESC
TCGA-HM-A3JJ	CESC
TCGA-HM-A3JK	CESC
TCGA-HM-A4S6	CESC
TCGA-HM-A6W2	CESC
TCGA-IR-A3L7	CESC
TCGA-IR-A3LA	CESC
TCGA-IR-A3LB	CESC
TCGA-IR-A3LC	CESC
TCGA-IR-A3LF	CESC
TCGA-IR-A3LH	CESC
TCGA-IR-A3LI	CESC
TCGA-IR-A3LK	CESC
TCGA-IR-A3LL	CESC
TCGA-JW-A5VG	CESC
TCGA-JW-A5VH	CESC
TCGA-JW-A5VI	CESC
TCGA-JW-A5VJ	CESC
TCGA-JW-A5VK	CESC
TCGA-JW-A5VL	CESC
TCGA-JW-A69B	CESC
TCGA-JW-A852	CESC
TCGA-JX-A3PZ	CESC
TCGA-JX-A3Q0	CESC
TCGA-JX-A3Q8	CESC
TCGA-JX-A5QV	CESC
TCGA-LP-A4AU	CESC
TCGA-LP-A4AV	CESC
TCGA-LP-A4AW	CESC
TCGA-LP-A4AX	CESC
TCGA-LP-A5U2	CESC
TCGA-LP-A5U3	CESC
TCGA-LP-A7HU	CESC
TCGA-MU-A51Y	CESC
TCGA-MU-A5YI	CESC
TCGA-MY-A5BD	CESC
TCGA-MY-A5BE	CESC
TCGA-MY-A5BF	CESC
TCGA-Q1-A5R1	CESC
TCGA-Q1-A5R2	CESC
TCGA-Q1-A5R3	CESC
TCGA-Q1-A6DT	CESC
TCGA-Q1-A6DV	CESC
TCGA-Q1-A6DW	CESC
TCGA-Q1-A73O	CESC
TCGA-Q1-A73P	CESC
TCGA-Q1-A73Q	CESC
TCGA-Q1-A73R	CESC
TCGA-Q1-A73S	CESC
TCGA-R2-A69V	CESC
TCGA-RA-A741	CESC
TCGA-UC-A7PD	CESC
TCGA-UC-A7PF	CESC
TCGA-WL-A834	CESC
TCGA-3X-AAV9	CHOL
TCGA-3X-AAVA	CHOL
TCGA-3X-AAVB	CHOL
TCGA-3X-AAVC	CHOL
TCGA-3X-AAVE	CHOL
TCGA-4G-AAZO	CHOL
TCGA-4G-AAZT	CHOL
TCGA-W5-AA2G	CHOL
TCGA-W5-AA2H	CHOL
TCGA-W5-AA2I	CHOL
TCGA-W5-AA2O	CHOL
TCGA-W5-AA2Q	CHOL
TCGA-W5-AA2R	CHOL
TCGA-W5-AA2T	CHOL
TCGA-W5-AA2U	CHOL
TCGA-W5-AA2W	CHOL
TCGA-W5-AA2X	CHOL
TCGA-W5-AA2Z	CHOL
TCGA-W5-AA30	CHOL
TCGA-W5-AA31	CHOL
TCGA-W5-AA33	CHOL
TCGA-W5-AA34	CHOL
TCGA-W5-AA36	CHOL
TCGA-W5-AA38	CHOL
TCGA-W5-AA39	CHOL
TCGA-W6-AA0S	CHOL
TCGA-WD-A7RX	CHOL
TCGA-YR-A95A	CHOL
TCGA-ZD-A8I3	CHOL
TCGA-ZH-A8Y1	CHOL
TCGA-ZH-A8Y2	CHOL
TCGA-ZH-A8Y4	CHOL
TCGA-ZH-A8Y5	CHOL
TCGA-ZH-A8Y6	CHOL
TCGA-ZH-A8Y8	CHOL
TCGA-ZU-A8S4	CHOL
TCGA-2H-A9GF	ESCA
TCGA-2H-A9GH	ESCA
TCGA-2H-A9GI	ESCA
TCGA-2H-A9GJ	ESCA
TCGA-2H-A9GK	ESCA
TCGA-2H-A9GL	ESCA
TCGA-2H-A9GM	ESCA
TCGA-2H-A9GN	ESCA
TCGA-2H-A9GO	ESCA
TCGA-2H-A9GQ	ESCA
TCGA-2H-A9GR	ESCA
TCGA-IC-A6RE	ESCA
TCGA-IG-A4QS	ESCA
TCGA-IG-A7DP	ESCA
TCGA-JY-A6F8	ESCA
TCGA-JY-A6FB	ESCA
TCGA-JY-A6FH	ESCA
TCGA-JY-A938	ESCA
TCGA-JY-A939	ESCA
TCGA-JY-A93C	ESCA
TCGA-JY-A93D	ESCA
TCGA-JY-A93E	ESCA
TCGA-L5-A43C	ESCA
TCGA-L5-A43E	ESCA
TCGA-L5-A43I	ESCA
TCGA-L5-A43M	ESCA
TCGA-L5-A4OE	ESCA
TCGA-L5-A4OF	ESCA
TCGA-L5-A4OG	ESCA
TCGA-L5-A4OH	ESCA
TCGA-L5-A4OI	ESCA
TCGA-L5-A4OJ	ESCA
TCGA-L5-A4ON	ESCA
TCGA-L5-A4OO	ESCA
TCGA-L5-A4OP	ESCA
TCGA-L5-A4OQ	ESCA
TCGA-L5-A4OR	ESCA
TCGA-L5-A4OS	ESCA
TCGA-L5-A4OT	ESCA
TCGA-L5-A4OU	ESCA
TCGA-L5-A4OW	ESCA
TCGA-L5-A4OX	ESCA
TCGA-L5-A88T	ESCA
TCGA-L5-A88V	ESCA
TCGA-L5-A88Y	ESCA
TCGA-L5-A891	ESCA
TCGA-L5-A893	ESCA
TCGA-L5-A8NE	ESCA
TCGA-L5-A8NF	ESCA
TCGA-L5-A8NG	ESCA
TCGA-L5-A8NH	ESCA
TCGA-L5-A8NI	ESCA
TCGA-L5-A8NJ	ESCA
TCGA-L5-A8NL	ESCA
TCGA-L5-A8NM	ESCA
TCGA-L5-A8NN	ESCA
TCGA-L5-A8NR	ESCA
TCGA-L5-A8NS	ESCA
TCGA-L5-A8NT	ESCA
TCGA-L5-A8NU	ESCA
TCGA-L5-A8NV	ESCA
TCGA-L5-A8NW	ESCA
TCGA-L7-A6VZ	ESCA
TCGA-M9-A5M8	ESCA
TCGA-Q9-A6FW	ESCA
TCGA-R6-A6DN	ESCA
TCGA-R6-A6DQ	ESCA
TCGA-R6-A6KZ	ESCA
TCGA-R6-A6L4	ESCA
TCGA-R6-A6L6	ESCA
TCGA-R6-A6XG	ESCA
TCGA-R6-A6XQ	ESCA
TCGA-R6-A6Y0	ESCA
TCGA-R6-A6Y2	ESCA
TCGA-R6-A8W5	ESCA
TCGA-R6-A8W8	ESCA
TCGA-R6-A8WC	ESCA
TCGA-R6-A8WG	ESCA
TCGA-RE-A7BO	ESCA
TCGA-S8-A6BV	ESCA
TCGA-V5-A7RB	ESCA
TCGA-V5-A7RE	ESCA
TCGA-V5-AASW	ESCA
TCGA-V5-AASX	ESCA
TCGA-VR-A8EQ	ESCA
TCGA-VR-AA4D	ESCA
TCGA-X8-AAAR	ESCA
TCGA-ZR-A9CJ	ESCA
TCGA-IC-A6RF	ESCA
TCGA-IG-A3I8	ESCA
TCGA-IG-A3QL	ESCA
TCGA-IG-A3Y9	ESCA
TCGA-IG-A3YA	ESCA
TCGA-IG-A3YB	ESCA
TCGA-IG-A3YC	ESCA
TCGA-IG-A4P3	ESCA
TCGA-IG-A4QT	ESCA
TCGA-IG-A50L	ESCA
TCGA-IG-A51D	ESCA
TCGA-IG-A5B8	ESCA
TCGA-IG-A5S3	ESCA
TCGA-IG-A625	ESCA
TCGA-IG-A6QS	ESCA
TCGA-IG-A8O2	ESCA
TCGA-IG-A97H	ESCA
TCGA-IG-A97I	ESCA
TCGA-JY-A6FA	ESCA
TCGA-JY-A6FD	ESCA
TCGA-JY-A6FE	ESCA
TCGA-JY-A6FG	ESCA
TCGA-JY-A93F	ESCA
TCGA-KH-A6WC	ESCA
TCGA-L5-A43H	ESCA
TCGA-L5-A43J	ESCA
TCGA-L5-A4OM	ESCA
TCGA-L5-A88S	ESCA
TCGA-L5-A88W	ESCA
TCGA-L5-A88Z	ESCA
TCGA-L5-A8NK	ESCA
TCGA-L5-A8NQ	ESCA
TCGA-L7-A56G	ESCA
TCGA-LN-A49K	ESCA
TCGA-LN-A49L	ESCA
TCGA-LN-A49M	ESCA
TCGA-LN-A49N	ESCA
TCGA-LN-A49O	ESCA
TCGA-LN-A49P	ESCA
TCGA-LN-A49R	ESCA
TCGA-LN-A49S	ESCA
TCGA-LN-A49U	ESCA
TCGA-LN-A49V	ESCA
TCGA-LN-A49W	ESCA
TCGA-LN-A49X	ESCA
TCGA-LN-A49Y	ESCA
TCGA-LN-A4A1	ESCA
TCGA-LN-A4A2	ESCA
TCGA-LN-A4A3	ESCA
TCGA-LN-A4A4	ESCA
TCGA-LN-A4A5	ESCA
TCGA-LN-A4A6	ESCA
TCGA-LN-A4A8	ESCA
TCGA-LN-A4A9	ESCA
TCGA-LN-A4MQ	ESCA
TCGA-LN-A4MR	ESCA
TCGA-LN-A5U5	ESCA
TCGA-LN-A5U6	ESCA
TCGA-LN-A5U7	ESCA
TCGA-LN-A7HV	ESCA
TCGA-LN-A7HW	ESCA
TCGA-LN-A7HX	ESCA
TCGA-LN-A7HY	ESCA
TCGA-LN-A7HZ	ESCA
TCGA-LN-A8HZ	ESCA
TCGA-LN-A8I0	ESCA
TCGA-LN-A8I1	ESCA
TCGA-LN-A9FO	ESCA
TCGA-LN-A9FP	ESCA
TCGA-LN-A9FQ	ESCA
TCGA-LN-A9FR	ESCA
TCGA-Q9-A6FU	ESCA
TCGA-S8-A6BW	ESCA
TCGA-V5-A7RC	ESCA
TCGA-V5-AASV	ESCA
TCGA-VR-A8EO	ESCA
TCGA-VR-A8EP	ESCA
TCGA-VR-A8ER	ESCA
TCGA-VR-A8ET	ESCA
TCGA-VR-A8EU	ESCA
TCGA-VR-A8EW	ESCA
TCGA-VR-A8EX	ESCA
TCGA-VR-A8EY	ESCA
TCGA-VR-A8EZ	ESCA
TCGA-VR-A8Q7	ESCA
TCGA-VR-AA4G	ESCA
TCGA-VR-AA7B	ESCA
TCGA-VR-AA7D	ESCA
TCGA-XP-A8T6	ESCA
TCGA-XP-A8T7	ESCA
TCGA-XP-A8T8	ESCA
TCGA-Z6-A8JD	ESCA
TCGA-Z6-A8JE	ESCA
TCGA-Z6-A9VB	ESCA
TCGA-Z6-AAPN	ESCA
TCGA-BA-4074	HNSC
TCGA-BA-4075	HNSC
TCGA-BA-4078	HNSC
TCGA-BA-5149	HNSC
TCGA-BA-5151	HNSC
TCGA-BA-5152	HNSC
TCGA-BA-5555	HNSC
TCGA-BA-5556	HNSC
TCGA-BA-5557	HNSC
TCGA-BA-5558	HNSC
TCGA-BA-5559	HNSC
TCGA-BA-6868	HNSC
TCGA-BA-6869	HNSC
TCGA-BA-6870	HNSC
TCGA-BA-6871	HNSC
TCGA-BA-6872	HNSC
TCGA-BA-6873	HNSC
TCGA-BA-7269	HNSC
TCGA-BA-A4IF	HNSC
TCGA-BA-A4IG	HNSC
TCGA-BA-A4II	HNSC
TCGA-BA-A6D8	HNSC
TCGA-BA-A6DA	HNSC
TCGA-BA-A6DB	HNSC
TCGA-BA-A6DD	HNSC
TCGA-BA-A6DE	HNSC
TCGA-BA-A6DF	HNSC
TCGA-BA-A6DG	HNSC
TCGA-BA-A6DI	HNSC
TCGA-BA-A6DJ	HNSC
TCGA-BA-A6DL	HNSC
TCGA-BB-4217	HNSC
TCGA-BB-4223	HNSC
TCGA-BB-4224	HNSC
TCGA-BB-4225	HNSC
TCGA-BB-4227	HNSC
TCGA-BB-4228	HNSC
TCGA-BB-7861	HNSC
TCGA-BB-7862	HNSC
TCGA-BB-7863	HNSC
TCGA-BB-7864	HNSC
TCGA-BB-7870	HNSC
TCGA-BB-7871	HNSC
TCGA-BB-7872	HNSC
TCGA-BB-8596	HNSC
TCGA-BB-8601	HNSC
TCGA-BB-A5HU	HNSC
TCGA-BB-A5HY	HNSC
TCGA-BB-A5HZ	HNSC
TCGA-BB-A6UM	HNSC
TCGA-BB-A6UO	HNSC
TCGA-C9-A47Z	HNSC
TCGA-C9-A480	HNSC
TCGA-CN-4723	HNSC
TCGA-CN-4725	HNSC
TCGA-CN-4726	HNSC
TCGA-CN-4727	HNSC
TCGA-CN-4728	HNSC
TCGA-CN-4729	HNSC
TCGA-CN-4730	HNSC
TCGA-CN-4731	HNSC
TCGA-CN-4733	HNSC
TCGA-CN-4734	HNSC
TCGA-CN-4735	HNSC
TCGA-CN-4736	HNSC
TCGA-CN-4738	HNSC
TCGA-CN-4739	HNSC
TCGA-CN-4740	HNSC
TCGA-CN-4742	HNSC
TCGA-CN-5355	HNSC
TCGA-CN-5356	HNSC
TCGA-CN-5358	HNSC
TCGA-CN-5359	HNSC
TCGA-CN-5360	HNSC
TCGA-CN-5361	HNSC
TCGA-CN-5363	HNSC
TCGA-CN-5364	HNSC
TCGA-CN-5366	HNSC
TCGA-CN-5367	HNSC
TCGA-CN-5369	HNSC
TCGA-CN-5370	HNSC
TCGA-CN-5373	HNSC
TCGA-CN-6010	HNSC
TCGA-CN-6011	HNSC
TCGA-CN-6012	HNSC
TCGA-CN-6013	HNSC
TCGA-CN-6016	HNSC
TCGA-CN-6017	HNSC
TCGA-CN-6018	HNSC
TCGA-CN-6019	HNSC
TCGA-CN-6020	HNSC
TCGA-CN-6021	HNSC
TCGA-CN-6022	HNSC
TCGA-CN-6023	HNSC
TCGA-CN-6024	HNSC
TCGA-CN-6988	HNSC
TCGA-CN-6989	HNSC
TCGA-CN-6992	HNSC
TCGA-CN-6994	HNSC
TCGA-CN-6995	HNSC
TCGA-CN-6996	HNSC
TCGA-CN-6997	HNSC
TCGA-CN-6998	HNSC
TCGA-CN-A497	HNSC
TCGA-CN-A498	HNSC
TCGA-CN-A499	HNSC
TCGA-CN-A49A	HNSC
TCGA-CN-A49B	HNSC
TCGA-CN-A49C	HNSC
TCGA-CN-A63T	HNSC
TCGA-CN-A63U	HNSC
TCGA-CN-A63V	HNSC
TCGA-CN-A63W	HNSC
TCGA-CN-A63Y	HNSC
TCGA-CN-A640	HNSC
TCGA-CN-A641	HNSC
TCGA-CN-A642	HNSC
TCGA-CN-A6UY	HNSC
TCGA-CN-A6V1	HNSC
TCGA-CN-A6V3	HNSC
TCGA-CN-A6V6	HNSC
TCGA-CN-A6V7	HNSC
TCGA-CQ-5323	HNSC
TCGA-CQ-5324	HNSC
TCGA-CQ-5325	HNSC
TCGA-CQ-5326	HNSC
TCGA-CQ-5327	HNSC
TCGA-CQ-5329	HNSC
TCGA-CQ-5330	HNSC
TCGA-CQ-5331	HNSC
TCGA-CQ-5332	HNSC
TCGA-CQ-5333	HNSC
TCGA-CQ-5334	HNSC
TCGA-CQ-6218	HNSC
TCGA-CQ-6219	HNSC
TCGA-CQ-6220	HNSC
TCGA-CQ-6221	HNSC
TCGA-CQ-6222	HNSC
TCGA-CQ-6223	HNSC
TCGA-CQ-6224	HNSC
TCGA-CQ-6225	HNSC
TCGA-CQ-6227	HNSC
TCGA-CQ-6228	HNSC
TCGA-CQ-6229	HNSC
TCGA-CQ-7063	HNSC
TCGA-CQ-7064	HNSC
TCGA-CQ-7065	HNSC
TCGA-CQ-7067	HNSC
TCGA-CQ-7068	HNSC
TCGA-CQ-7069	HNSC
TCGA-CQ-7071	HNSC
TCGA-CQ-7072	HNSC
TCGA-CQ-A4C6	HNSC
TCGA-CQ-A4C7	HNSC
TCGA-CQ-A4C9	HNSC
TCGA-CQ-A4CB	HNSC
TCGA-CQ-A4CD	HNSC
TCGA-CQ-A4CE	HNSC
TCGA-CQ-A4CG	HNSC
TCGA-CQ-A4CH	HNSC
TCGA-CQ-A4CI	HNSC
TCGA-CR-5243	HNSC
TCGA-CR-5247	HNSC
TCGA-CR-5248	HNSC
TCGA-CR-6471	HNSC
TCGA-CR-6473	HNSC
TCGA-CR-6474	HNSC
TCGA-CR-6477	HNSC
TCGA-CR-6478	HNSC
TCGA-CR-6481	HNSC
TCGA-CR-6484	HNSC
TCGA-CR-6488	HNSC
TCGA-CR-6491	HNSC
TCGA-CR-6492	HNSC
TCGA-CR-6493	HNSC
TCGA-CR-7364	HNSC
TCGA-CR-7365	HNSC
TCGA-CR-7367	HNSC
TCGA-CR-7368	HNSC
TCGA-CR-7369	HNSC
TCGA-CR-7370	HNSC
TCGA-CR-7371	HNSC
TCGA-CR-7372	HNSC
TCGA-CR-7373	HNSC
TCGA-CR-7374	HNSC
TCGA-CR-7376	HNSC
TCGA-CR-7377	HNSC
TCGA-CR-7379	HNSC
TCGA-CR-7380	HNSC
TCGA-CR-7382	HNSC
TCGA-CR-7383	HNSC
TCGA-CR-7386	HNSC
TCGA-CR-7388	HNSC
TCGA-CR-7389	HNSC
TCGA-CR-7390	HNSC
TCGA-CR-7391	HNSC
TCGA-CR-7392	HNSC
TCGA-CR-7393	HNSC
TCGA-CR-7394	HNSC
TCGA-CR-7395	HNSC
TCGA-CR-7397	HNSC
TCGA-CR-7398	HNSC
TCGA-CR-7399	HNSC
TCGA-CR-7401	HNSC
TCGA-CR-7402	HNSC
TCGA-CV-5430	HNSC
TCGA-CV-5431	HNSC
TCGA-CV-5432	HNSC
TCGA-CV-5434	HNSC
TCGA-CV-5435	HNSC
TCGA-CV-5436	HNSC
TCGA-CV-5439	HNSC
TCGA-CV-5440	HNSC
TCGA-CV-5441	HNSC
TCGA-CV-5444	HNSC
TCGA-CV-5966	HNSC
TCGA-CV-5970	HNSC
TCGA-CV-5971	HNSC
TCGA-CV-5973	HNSC
TCGA-CV-5976	HNSC
TCGA-CV-5977	HNSC
TCGA-CV-5978	HNSC
TCGA-CV-5979	HNSC
TCGA-CV-6003	HNSC
TCGA-CV-6436	HNSC
TCGA-CV-6441	HNSC
TCGA-CV-6933	HNSC
TCGA-CV-6934	HNSC
TCGA-CV-6935	HNSC
TCGA-CV-6936	HNSC
TCGA-CV-6937	HNSC
TCGA-CV-6938	HNSC
TCGA-CV-6939	HNSC
TCGA-CV-6940	HNSC
TCGA-CV-6941	HNSC
TCGA-CV-6942	HNSC
TCGA-CV-6943	HNSC
TCGA-CV-6945	HNSC
TCGA-CV-6948	HNSC
TCGA-CV-6950	HNSC
TCGA-CV-6951	HNSC
TCGA-CV-6952	HNSC
TCGA-CV-6953	HNSC
TCGA-CV-6954	HNSC
TCGA-CV-6955	HNSC
TCGA-CV-6956	HNSC
TCGA-CV-6959	HNSC
TCGA-CV-6960	HNSC
TCGA-CV-6962	HNSC
TCGA-CV-7089	HNSC
TCGA-CV-7091	HNSC
TCGA-CV-7095	HNSC
TCGA-CV-7097	HNSC
TCGA-CV-7099	HNSC
TCGA-CV-7101	HNSC
TCGA-CV-7102	HNSC
TCGA-CV-7103	HNSC
TCGA-CV-7104	HNSC
TCGA-CV-7177	HNSC
TCGA-CV-7178	HNSC
TCGA-CV-7183	HNSC
TCGA-CV-7235	HNSC
TCGA-CV-7236	HNSC
TCGA-CV-7238	HNSC
TCGA-CV-7242	HNSC
TCGA-CV-7243	HNSC
TCGA-CV-7245	HNSC
TCGA-CV-7247	HNSC
TCGA-CV-7248	HNSC
TCGA-CV-7250	HNSC
TCGA-CV-7252	HNSC
TCGA-CV-7253	HNSC
TCGA-CV-7254	HNSC
TCGA-CV-7261	HNSC
TCGA-CV-7263	HNSC
TCGA-CV-7406	HNSC
TCGA-CV-7407	HNSC
TCGA-CV-7409	HNSC
TCGA-CV-7410	HNSC
TCGA-CV-7411	HNSC
TCGA-CV-7413	HNSC
TCGA-CV-7414	HNSC
TCGA-CV-7415	HNSC
TCGA-CV-7418	HNSC
TCGA-CV-7421	HNSC
TCGA-CV-7422	HNSC
TCGA-CV-7423	HNSC
TCGA-CV-7424	HNSC
TCGA-CV-7425	HNSC
TCGA-CV-7427	HNSC
TCGA-CV-7429	HNSC
TCGA-CV-7430	HNSC
TCGA-CV-7432	HNSC
TCGA-CV-7433	HNSC
TCGA-CV-7434	HNSC
TCGA-CV-7435	HNSC
TCGA-CV-7437	HNSC
TCGA-CV-7438	HNSC
TCGA-CV-7440	HNSC
TCGA-CV-7446	HNSC
TCGA-CV-7568	HNSC
TCGA-CV-A45O	HNSC
TCGA-CV-A45P	HNSC
TCGA-CV-A45Q	HNSC
TCGA-CV-A45R	HNSC
TCGA-CV-A45T	HNSC
TCGA-CV-A45U	HNSC
TCGA-CV-A45V	HNSC
TCGA-CV-A45W	HNSC
TCGA-CV-A45X	HNSC
TCGA-CV-A45Y	HNSC
TCGA-CV-A45Z	HNSC
TCGA-CV-A460	HNSC
TCGA-CV-A461	HNSC
TCGA-CV-A463	HNSC
TCGA-CV-A464	HNSC
TCGA-CV-A465	HNSC
TCGA-CV-A468	HNSC
TCGA-CV-A6JD	HNSC
TCGA-CV-A6JE	HNSC
TCGA-CV-A6JM	HNSC
TCGA-CV-A6JN	HNSC
TCGA-CV-A6JO	HNSC
TCGA-CV-A6JT	HNSC
TCGA-CV-A6JU	HNSC
TCGA-CV-A6JY	HNSC
TCGA-CV-A6JZ	HNSC
TCGA-CV-A6K0	HNSC
TCGA-CV-A6K1	HNSC
TCGA-CV-A6K2	HNSC
TCGA-CX-7082	HNSC
TCGA-CX-7085	HNSC
TCGA-CX-7086	HNSC
TCGA-CX-7219	HNSC
TCGA-CX-A4AQ	HNSC
TCGA-D6-6515	HNSC
TCGA-D6-6516	HNSC
TCGA-D6-6517	HNSC
TCGA-D6-6823	HNSC
TCGA-D6-6824	HNSC
TCGA-D6-6825	HNSC
TCGA-D6-6826	HNSC
TCGA-D6-6827	HNSC
TCGA-D6-8568	HNSC
TCGA-D6-8569	HNSC
TCGA-D6-A4Z9	HNSC
TCGA-D6-A4ZB	HNSC
TCGA-D6-A6EK	HNSC
TCGA-D6-A6EM	HNSC
TCGA-D6-A6EN	HNSC
TCGA-D6-A6EO	HNSC
TCGA-D6-A6EP	HNSC
TCGA-D6-A6EQ	HNSC
TCGA-D6-A6ES	HNSC
TCGA-D6-A74Q	HNSC
TCGA-DQ-5624	HNSC
TCGA-DQ-5625	HNSC
TCGA-DQ-5629	HNSC
TCGA-DQ-5630	HNSC
TCGA-DQ-5631	HNSC
TCGA-DQ-7588	HNSC
TCGA-DQ-7589	HNSC
TCGA-DQ-7590	HNSC
TCGA-DQ-7591	HNSC
TCGA-DQ-7592	HNSC
TCGA-DQ-7593	HNSC
TCGA-DQ-7594	HNSC
TCGA-DQ-7595	HNSC
TCGA-DQ-7596	HNSC
TCGA-F7-7848	HNSC
TCGA-F7-8298	HNSC
TCGA-F7-8489	HNSC
TCGA-F7-A50G	HNSC
TCGA-F7-A50I	HNSC
TCGA-F7-A50J	HNSC
TCGA-F7-A61S	HNSC
TCGA-F7-A61V	HNSC
TCGA-F7-A61W	HNSC
TCGA-F7-A620	HNSC
TCGA-F7-A622	HNSC
TCGA-F7-A623	HNSC
TCGA-F7-A624	HNSC
TCGA-H7-7774	HNSC
TCGA-H7-8501	HNSC
TCGA-H7-8502	HNSC
TCGA-H7-A6C5	HNSC
TCGA-H7-A76A	HNSC
TCGA-HD-7229	HNSC
TCGA-HD-7753	HNSC
TCGA-HD-7754	HNSC
TCGA-HD-7831	HNSC
TCGA-HD-7832	HNSC
TCGA-HD-7917	HNSC
TCGA-HD-8224	HNSC
TCGA-HD-8314	HNSC
TCGA-HD-8634	HNSC
TCGA-HD-8635	HNSC
TCGA-HD-A4C1	HNSC
TCGA-HD-A633	HNSC
TCGA-HD-A634	HNSC
TCGA-HD-A6HZ	HNSC
TCGA-HD-A6I0	HNSC
TCGA-HL-7533	HNSC
TCGA-IQ-7630	HNSC
TCGA-IQ-7631	HNSC
TCGA-IQ-7632	HNSC
TCGA-IQ-A61E	HNSC
TCGA-IQ-A61G	HNSC
TCGA-IQ-A61H	HNSC
TCGA-IQ-A61I	HNSC
TCGA-IQ-A61J	HNSC
TCGA-IQ-A61K	HNSC
TCGA-IQ-A61L	HNSC
TCGA-IQ-A61O	HNSC
TCGA-IQ-A6SG	HNSC
TCGA-IQ-A6SH	HNSC
TCGA-KU-A66S	HNSC
TCGA-KU-A66T	HNSC
TCGA-KU-A6H7	HNSC
TCGA-KU-A6H8	HNSC
TCGA-MT-A51W	HNSC
TCGA-MT-A51X	HNSC
TCGA-MT-A67A	HNSC
TCGA-MT-A67D	HNSC
TCGA-MT-A67F	HNSC
TCGA-MT-A67G	HNSC
TCGA-MT-A7BN	HNSC
TCGA-MZ-A5BI	HNSC
TCGA-MZ-A6I9	HNSC
TCGA-MZ-A7D7	HNSC
TCGA-P3-A5Q6	HNSC
TCGA-P3-A5QA	HNSC
TCGA-P3-A5QE	HNSC
TCGA-P3-A5QF	HNSC
TCGA-P3-A6SW	HNSC
TCGA-P3-A6SX	HNSC
TCGA-P3-A6T0	HNSC
TCGA-P3-A6T2	HNSC
TCGA-P3-A6T3	HNSC
TCGA-P3-A6T4	HNSC
TCGA-P3-A6T5	HNSC
TCGA-P3-A6T6	HNSC
TCGA-P3-A6T7	HNSC
TCGA-P3-A6T8	HNSC
TCGA-QK-A64Z	HNSC
TCGA-QK-A652	HNSC
TCGA-QK-A6IF	HNSC
TCGA-QK-A6IG	HNSC
TCGA-QK-A6IH	HNSC
TCGA-QK-A6II	HNSC
TCGA-QK-A6IJ	HNSC
TCGA-QK-A6V9	HNSC
TCGA-QK-A6VB	HNSC
TCGA-QK-A6VC	HNSC
TCGA-RS-A6TO	HNSC
TCGA-RS-A6TP	HNSC
TCGA-T2-A6WX	HNSC
TCGA-T2-A6WZ	HNSC
TCGA-T2-A6X0	HNSC
TCGA-T2-A6X2	HNSC
TCGA-TN-A7HI	HNSC
TCGA-TN-A7HJ	HNSC
TCGA-TN-A7HL	HNSC
TCGA-UF-A718	HNSC
TCGA-UF-A719	HNSC
TCGA-UF-A71A	HNSC
TCGA-UF-A71B	HNSC
TCGA-UF-A71D	HNSC
TCGA-UF-A71E	HNSC
TCGA-UF-A7J9	HNSC
TCGA-UF-A7JA	HNSC
TCGA-UF-A7JC	HNSC
TCGA-UF-A7JD	HNSC
TCGA-UF-A7JF	HNSC
TCGA-UF-A7JH	HNSC
TCGA-UF-A7JJ	HNSC
TCGA-UF-A7JK	HNSC
TCGA-UF-A7JO	HNSC
TCGA-UF-A7JS	HNSC
TCGA-UF-A7JT	HNSC
TCGA-UF-A7JV	HNSC
TCGA-UP-A6WW	HNSC
TCGA-WA-A7GZ	HNSC
TCGA-WA-A7H4	HNSC
TCGA-KL-8324	KICH
TCGA-KL-8326	KICH
TCGA-KL-8327	KICH
TCGA-KL-8328	KICH
TCGA-KL-8329	KICH
TCGA-KL-8330	KICH
TCGA-KL-8331	KICH
TCGA-KL-8332	KICH
TCGA-KL-8333	KICH
TCGA-KL-8334	KICH
TCGA-KL-8335	KICH
TCGA-KL-8336	KICH
TCGA-KL-8337	KICH
TCGA-KL-8338	KICH
TCGA-KL-8339	KICH
TCGA-KL-8340	KICH
TCGA-KL-8343	KICH
TCGA-KL-8344	KICH
TCGA-KL-8345	KICH
TCGA-KL-8346	KICH
TCGA-KM-8438	KICH
TCGA-KM-8439	KICH
TCGA-KM-8441	KICH
TCGA-KM-8442	KICH
TCGA-KM-8443	KICH
TCGA-KM-8476	KICH
TCGA-KM-8477	KICH
TCGA-KM-8639	KICH
TCGA-KN-8419	KICH
TCGA-KN-8421	KICH
TCGA-KN-8422	KICH
TCGA-KN-8423	KICH
TCGA-KN-8425	KICH
TCGA-KN-8426	KICH
TCGA-KN-8427	KICH
TCGA-KN-8428	KICH
TCGA-KN-8431	KICH
TCGA-KN-8432	KICH
TCGA-KN-8433	KICH
TCGA-KN-8436	KICH
TCGA-KN-8437	KICH
TCGA-KO-8403	KICH
TCGA-KO-8404	KICH
TCGA-KO-8405	KICH
TCGA-KO-8408	KICH
TCGA-KO-8409	KICH
TCGA-KO-8410	KICH
TCGA-KO-8413	KICH
TCGA-KO-8414	KICH
TCGA-KO-8415	KICH
TCGA-A3-3311	KIRC
TCGA-A3-3313	KIRC
TCGA-A3-3316	KIRC
TCGA-A3-3317	KIRC
TCGA-A3-3319	KIRC
TCGA-A3-3320	KIRC
TCGA-A3-3322	KIRC
TCGA-A3-3323	KIRC
TCGA-A3-3326	KIRC
TCGA-A3-3331	KIRC
TCGA-A3-3346	KIRC
TCGA-A3-3357	KIRC
TCGA-A3-3363	KIRC
TCGA-A3-3365	KIRC
TCGA-A3-3367	KIRC
TCGA-A3-3373	KIRC
TCGA-A3-3374	KIRC
TCGA-A3-3376	KIRC
TCGA-A3-3378	KIRC
TCGA-A3-3380	KIRC
TCGA-A3-3382	KIRC
TCGA-A3-3383	KIRC
TCGA-A3-3385	KIRC
TCGA-AK-3427	KIRC
TCGA-AK-3440	KIRC
TCGA-AK-3443	KIRC
TCGA-AK-3444	KIRC
TCGA-AK-3447	KIRC
TCGA-AK-3453	KIRC
TCGA-AK-3465	KIRC
TCGA-AS-3777	KIRC
TCGA-AS-3778	KIRC
TCGA-B0-4823	KIRC
TCGA-B0-4827	KIRC
TCGA-B0-4842	KIRC
TCGA-B0-4945	KIRC
TCGA-B0-5075	KIRC
TCGA-B0-5077	KIRC
TCGA-B0-5081	KIRC
TCGA-B0-5083	KIRC
TCGA-B0-5084	KIRC
TCGA-B0-5085	KIRC
TCGA-B0-5088	KIRC
TCGA-B0-5092	KIRC
TCGA-B0-5095	KIRC
TCGA-B0-5096	KIRC
TCGA-B0-5097	KIRC
TCGA-B0-5098	KIRC
TCGA-B0-5099	KIRC
TCGA-B0-5100	KIRC
TCGA-B0-5102	KIRC
TCGA-B0-5104	KIRC
TCGA-B0-5106	KIRC
TCGA-B0-5107	KIRC
TCGA-B0-5108	KIRC
TCGA-B0-5109	KIRC
TCGA-B0-5110	KIRC
TCGA-B0-5113	KIRC
TCGA-B0-5115	KIRC
TCGA-B0-5116	KIRC
TCGA-B0-5117	KIRC
TCGA-B0-5119	KIRC
TCGA-B0-5120	KIRC
TCGA-B0-5121	KIRC
TCGA-B0-5698	KIRC
TCGA-B0-5710	KIRC
TCGA-B0-5711	KIRC
TCGA-B0-5712	KIRC
TCGA-B0-5713	KIRC
TCGA-B0-5812	KIRC
TCGA-B2-3923	KIRC
TCGA-B2-3924	KIRC
TCGA-B2-4098	KIRC
TCGA-B4-5832	KIRC
TCGA-B4-5834	KIRC
TCGA-B4-5835	KIRC
TCGA-B4-5836	KIRC
TCGA-B4-5838	KIRC
TCGA-B4-5843	KIRC
TCGA-B4-5844	KIRC
TCGA-B8-4146	KIRC
TCGA-B8-4153	KIRC
TCGA-B8-4619	KIRC
TCGA-B8-4620	KIRC
TCGA-B8-4622	KIRC
TCGA-B8-5158	KIRC
TCGA-B8-5159	KIRC
TCGA-B8-5162	KIRC
TCGA-B8-5163	KIRC
TCGA-B8-5164	KIRC
TCGA-B8-5165	KIRC
TCGA-B8-5545	KIRC
TCGA-B8-5552	KIRC
TCGA-BP-4177	KIRC
TCGA-BP-4760	KIRC
TCGA-BP-4782	KIRC
TCGA-BP-4795	KIRC
TCGA-BP-4801	KIRC
TCGA-BP-4960	KIRC
TCGA-BP-4961	KIRC
TCGA-BP-4962	KIRC
TCGA-BP-4963	KIRC
TCGA-BP-4964	KIRC
TCGA-BP-4965	KIRC
TCGA-BP-4967	KIRC
TCGA-BP-4970	KIRC
TCGA-BP-4971	KIRC
TCGA-BP-4972	KIRC
TCGA-BP-4973	KIRC
TCGA-BP-4974	KIRC
TCGA-BP-4975	KIRC
TCGA-BP-4976	KIRC
TCGA-BP-4981	KIRC
TCGA-BP-4982	KIRC
TCGA-BP-4983	KIRC
TCGA-BP-4985	KIRC
TCGA-BP-4986	KIRC
TCGA-BP-4987	KIRC
TCGA-BP-4988	KIRC
TCGA-BP-4991	KIRC
TCGA-BP-4992	KIRC
TCGA-BP-4993	KIRC
TCGA-BP-4994	KIRC
TCGA-BP-4995	KIRC
TCGA-BP-4998	KIRC
TCGA-BP-5000	KIRC
TCGA-BP-5001	KIRC
TCGA-BP-5004	KIRC
TCGA-BP-5006	KIRC
TCGA-BP-5007	KIRC
TCGA-BP-5008	KIRC
TCGA-BP-5009	KIRC
TCGA-BP-5169	KIRC
TCGA-BP-5170	KIRC
TCGA-BP-5173	KIRC
TCGA-BP-5174	KIRC
TCGA-BP-5175	KIRC
TCGA-BP-5176	KIRC
TCGA-BP-5177	KIRC
TCGA-BP-5178	KIRC
TCGA-BP-5180	KIRC
TCGA-BP-5181	KIRC
TCGA-BP-5182	KIRC
TCGA-BP-5183	KIRC
TCGA-BP-5184	KIRC
TCGA-BP-5185	KIRC
TCGA-BP-5186	KIRC
TCGA-BP-5187	KIRC
TCGA-BP-5189	KIRC
TCGA-BP-5190	KIRC
TCGA-BP-5191	KIRC
TCGA-BP-5192	KIRC
TCGA-BP-5194	KIRC
TCGA-BP-5195	KIRC
TCGA-BP-5196	KIRC
TCGA-BP-5198	KIRC
TCGA-BP-5199	KIRC
TCGA-BP-5200	KIRC
TCGA-BP-5201	KIRC
TCGA-BP-5202	KIRC
TCGA-CJ-4869	KIRC
TCGA-CJ-4882	KIRC
TCGA-CJ-4897	KIRC
TCGA-CJ-4900	KIRC
TCGA-CJ-4901	KIRC
TCGA-CJ-4902	KIRC
TCGA-CJ-4903	KIRC
TCGA-CJ-4904	KIRC
TCGA-CJ-4905	KIRC
TCGA-CJ-4907	KIRC
TCGA-CJ-4908	KIRC
TCGA-CJ-4912	KIRC
TCGA-CJ-4913	KIRC
TCGA-CJ-4916	KIRC
TCGA-CJ-4920	KIRC
TCGA-CJ-4923	KIRC
TCGA-CJ-5686	KIRC
TCGA-CJ-6027	KIRC
TCGA-CJ-6028	KIRC
TCGA-CJ-6030	KIRC
TCGA-CJ-6031	KIRC
TCGA-CJ-6032	KIRC
TCGA-CW-5580	KIRC
TCGA-CW-6090	KIRC
TCGA-CW-6097	KIRC
TCGA-CZ-4853	KIRC
TCGA-CZ-4859	KIRC
TCGA-CZ-5982	KIRC
TCGA-CZ-5984	KIRC
TCGA-CZ-5985	KIRC
TCGA-CZ-5986	KIRC
TCGA-CZ-5988	KIRC
TCGA-CZ-5989	KIRC
TCGA-EU-5904	KIRC
TCGA-EU-5905	KIRC
TCGA-EU-5906	KIRC
TCGA-EU-5907	KIRC
TCGA-A4-7286	KIRP
TCGA-A4-7287	KIRP
TCGA-A4-7288	KIRP
TCGA-A4-7583	KIRP
TCGA-A4-7584	KIRP
TCGA-A4-7585	KIRP
TCGA-A4-7732	KIRP
TCGA-A4-7734	KIRP
TCGA-A4-7828	KIRP
TCGA-A4-7915	KIRP
TCGA-A4-7996	KIRP
TCGA-A4-7997	KIRP
TCGA-A4-8098	KIRP
TCGA-A4-8310	KIRP
TCGA-A4-8311	KIRP
TCGA-A4-8312	KIRP
TCGA-A4-8515	KIRP
TCGA-A4-8516	KIRP
TCGA-A4-8517	KIRP
TCGA-A4-8518	KIRP
TCGA-A4-8630	KIRP
TCGA-A4-A48D	KIRP
TCGA-A4-A4ZT	KIRP
TCGA-A4-A57E	KIRP
TCGA-A4-A5DU	KIRP
TCGA-A4-A5XZ	KIRP
TCGA-A4-A5Y0	KIRP
TCGA-A4-A5Y1	KIRP
TCGA-A4-A6HP	KIRP
TCGA-AL-3466	KIRP
TCGA-AL-3467	KIRP
TCGA-AL-3468	KIRP
TCGA-AL-3472	KIRP
TCGA-AL-3473	KIRP
TCGA-AL-7173	KIRP
TCGA-AL-A5DJ	KIRP
TCGA-AT-A5NU	KIRP
TCGA-B1-5398	KIRP
TCGA-B1-A47M	KIRP
TCGA-B1-A47N	KIRP
TCGA-B1-A47O	KIRP
TCGA-B1-A654	KIRP
TCGA-B1-A655	KIRP
TCGA-B1-A656	KIRP
TCGA-B1-A657	KIRP
TCGA-B3-3925	KIRP
TCGA-B3-3926	KIRP
TCGA-B3-4103	KIRP
TCGA-B3-4104	KIRP
TCGA-B3-8121	KIRP
TCGA-B9-4113	KIRP
TCGA-B9-4114	KIRP
TCGA-B9-4115	KIRP
TCGA-B9-4116	KIRP
TCGA-B9-4117	KIRP
TCGA-B9-4617	KIRP
TCGA-B9-5155	KIRP
TCGA-B9-5156	KIRP
TCGA-B9-7268	KIRP
TCGA-B9-A44B	KIRP
TCGA-B9-A5W7	KIRP
TCGA-B9-A5W8	KIRP
TCGA-B9-A5W9	KIRP
TCGA-B9-A69E	KIRP
TCGA-BQ-5875	KIRP
TCGA-BQ-5876	KIRP
TCGA-BQ-5877	KIRP
TCGA-BQ-5878	KIRP
TCGA-BQ-5879	KIRP
TCGA-BQ-5880	KIRP
TCGA-BQ-5881	KIRP
TCGA-BQ-5882	KIRP
TCGA-BQ-5883	KIRP
TCGA-BQ-5884	KIRP
TCGA-BQ-5885	KIRP
TCGA-BQ-5886	KIRP
TCGA-BQ-5887	KIRP
TCGA-BQ-5888	KIRP
TCGA-BQ-5889	KIRP
TCGA-BQ-5890	KIRP
TCGA-BQ-5891	KIRP
TCGA-BQ-5892	KIRP
TCGA-BQ-5893	KIRP
TCGA-BQ-5894	KIRP
TCGA-BQ-7044	KIRP
TCGA-BQ-7045	KIRP
TCGA-BQ-7046	KIRP
TCGA-BQ-7048	KIRP
[truncated: 3,337 more rows]
