# Supplementary figures and images for: Non-coding cancer driver candidates identified with a sample- and position-specific model of the somatic mutation rate
Source: eLife journal article supplement (doi:10.7554/elife.21778), 2017-03-31

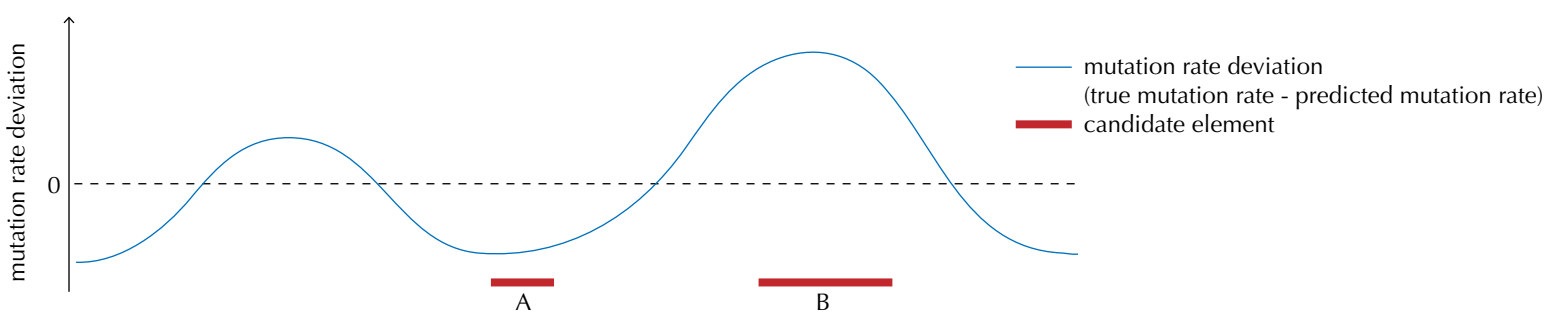

Supplement: supp [file elife-21778-supp-v1.zip]

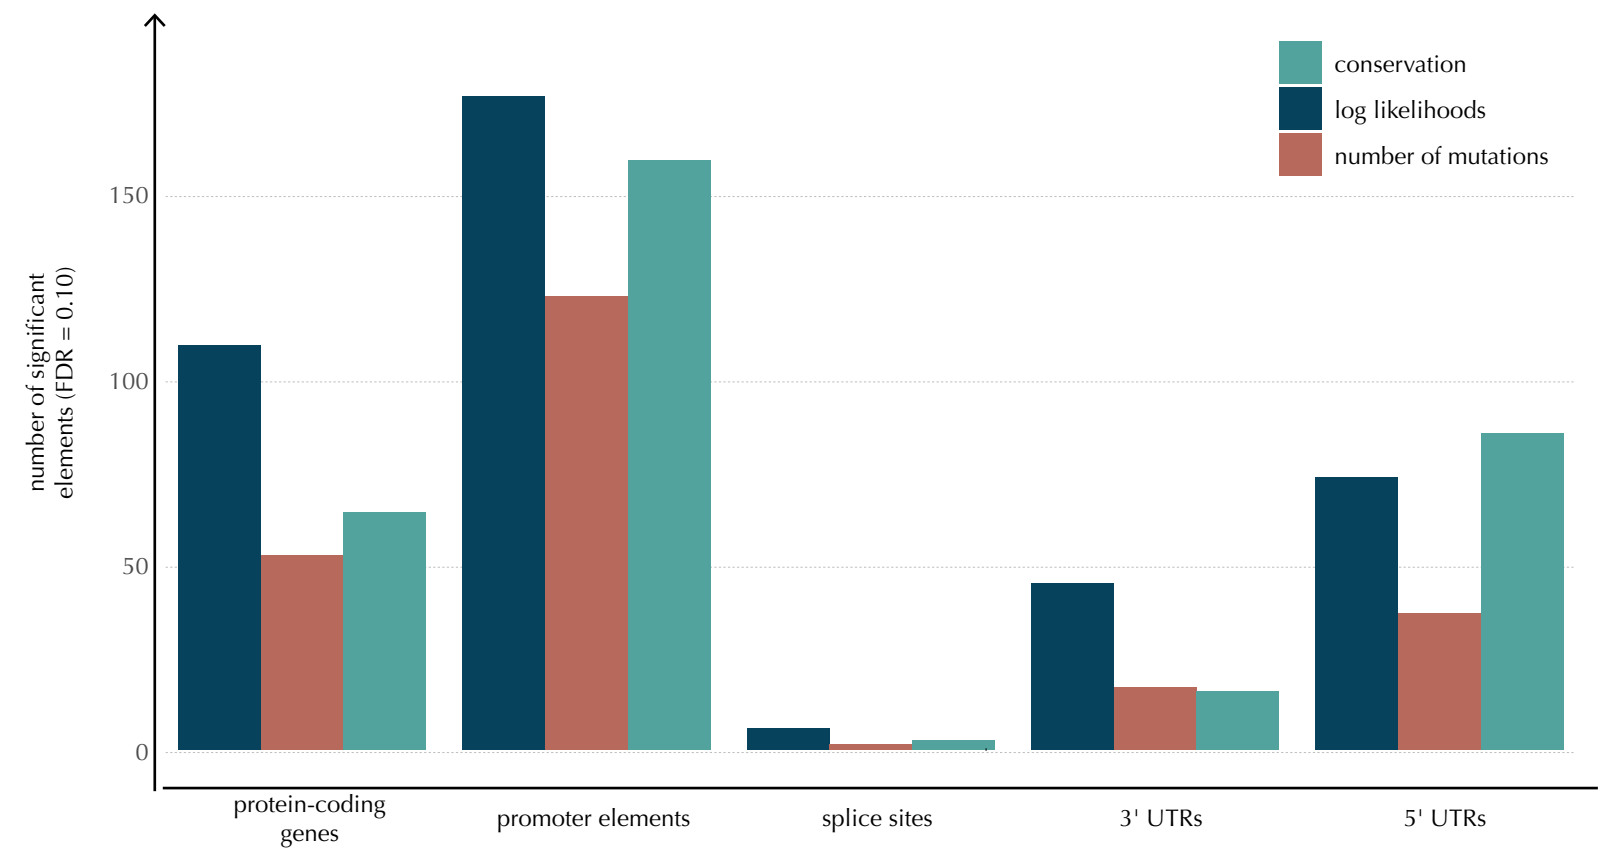

Supplement: supp [file elife-21778-supp-v1.zip]

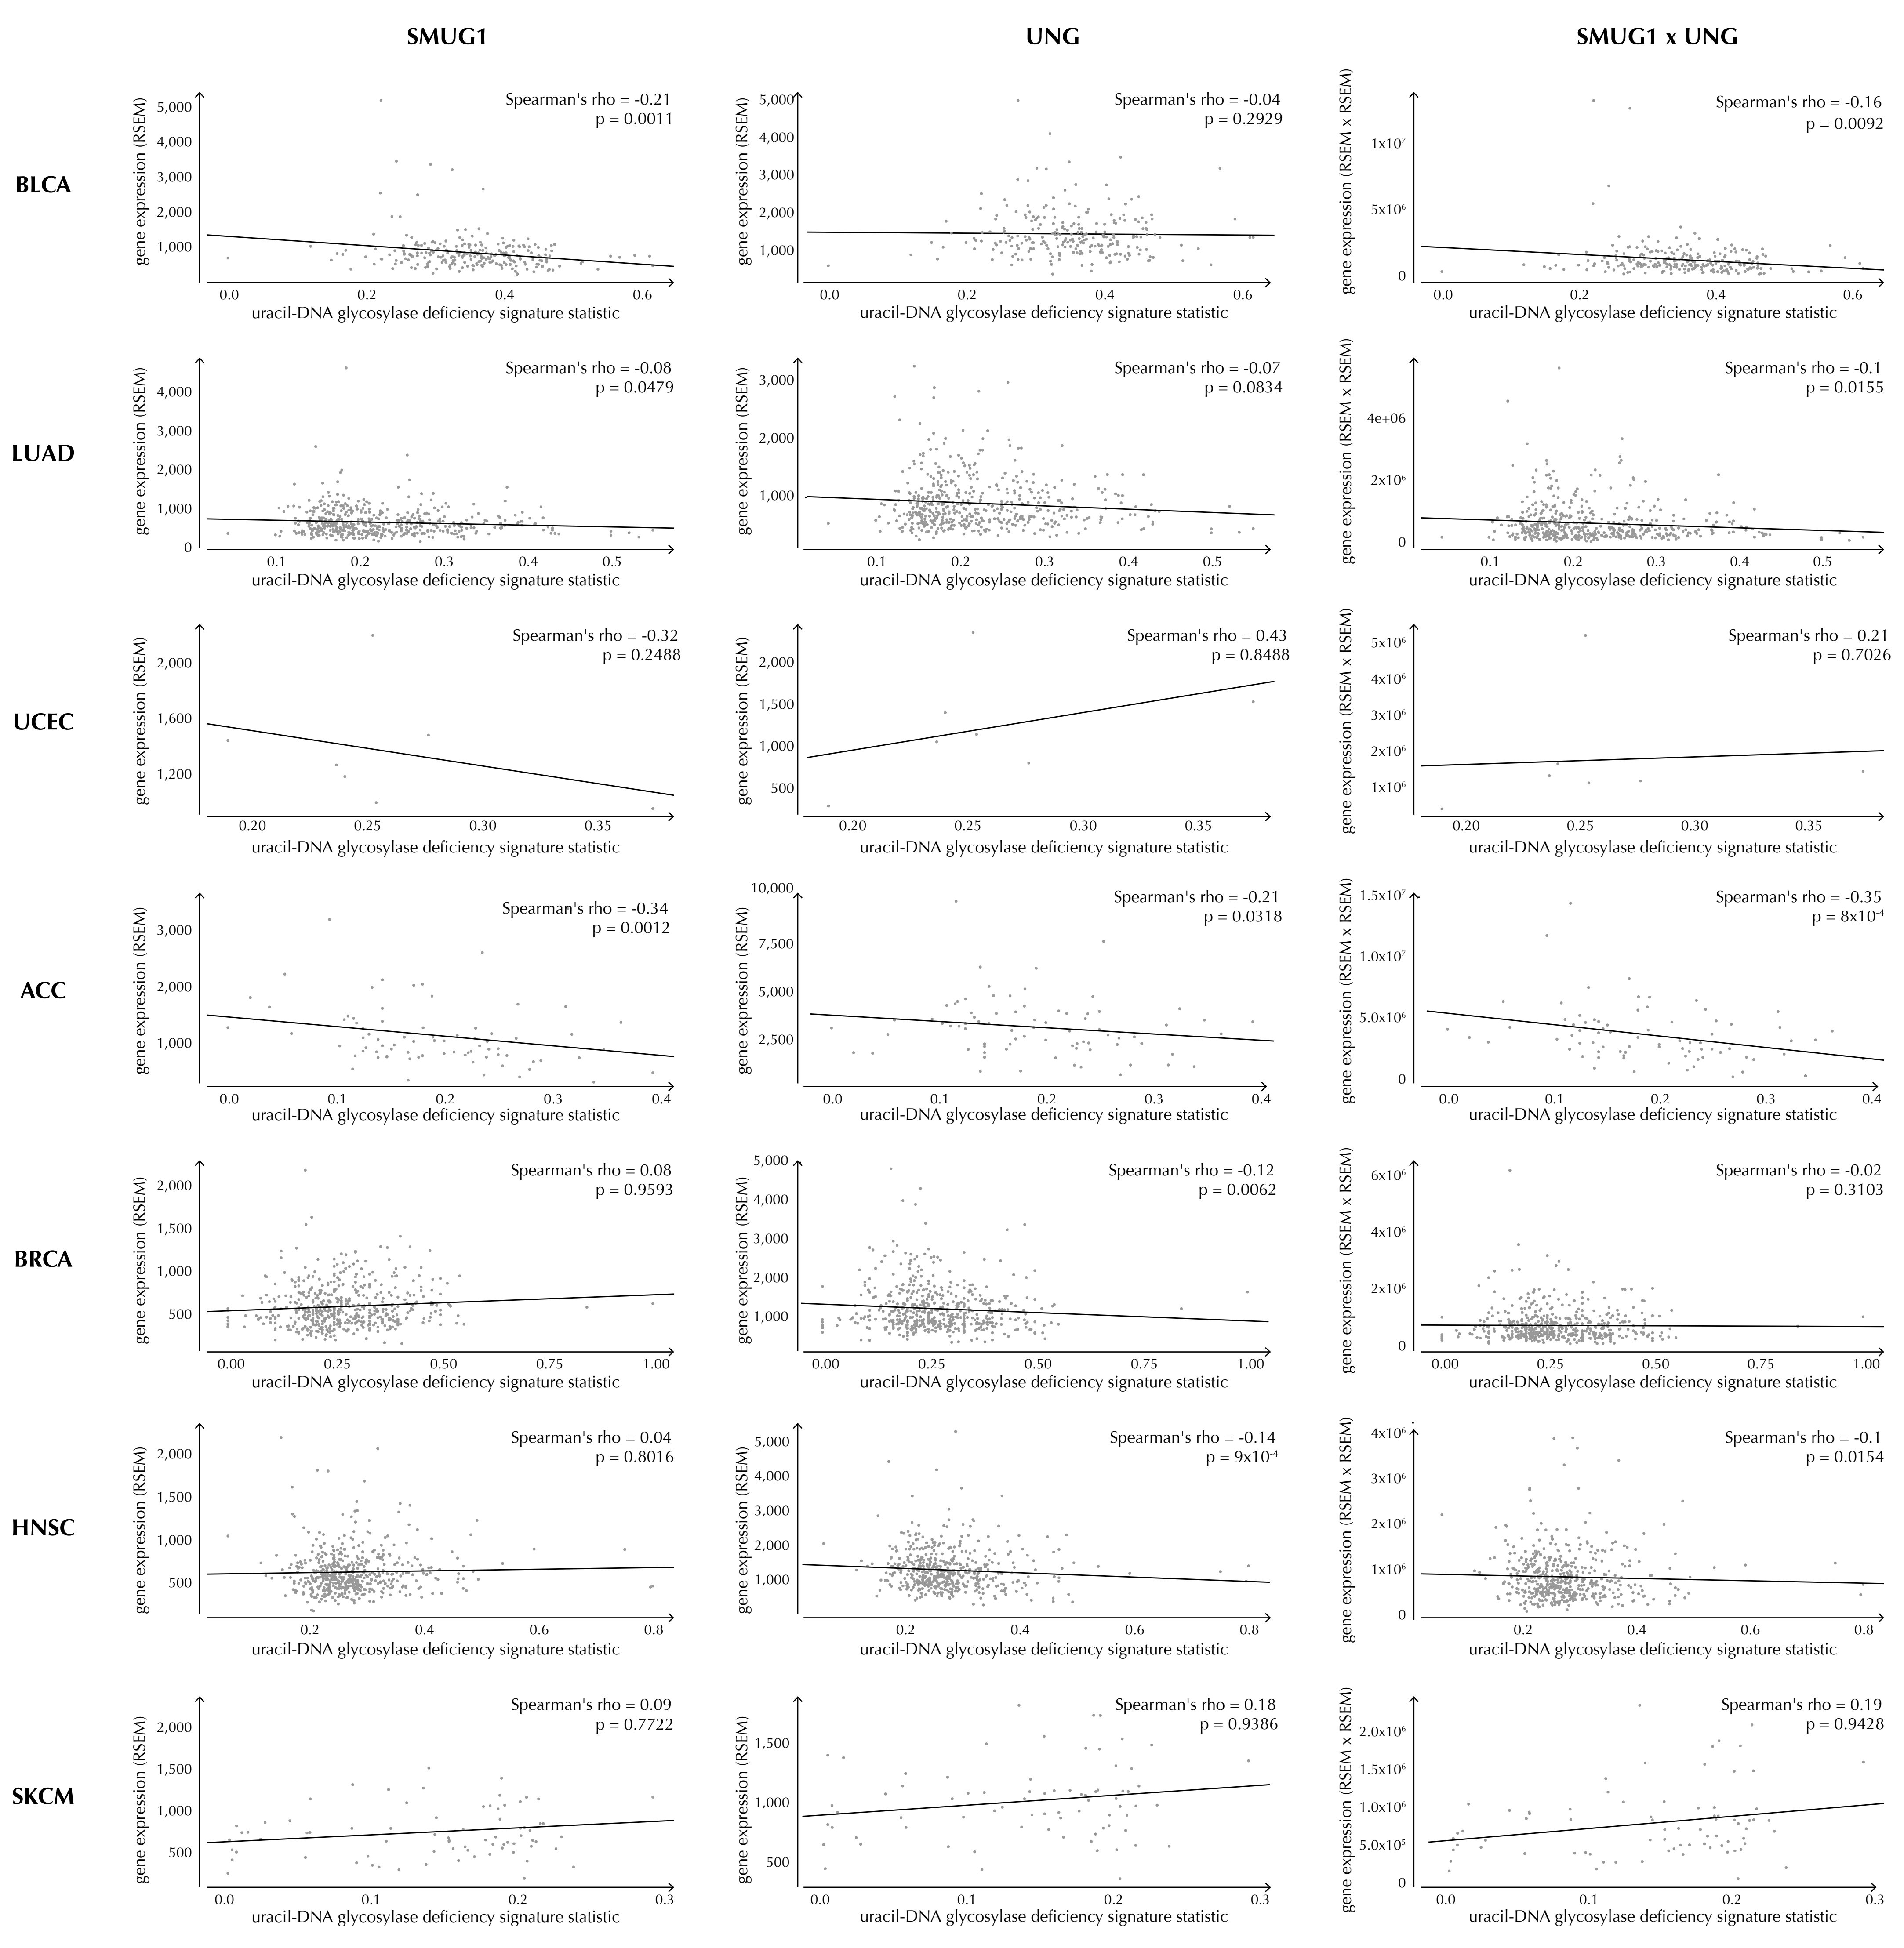

Supplement: supp [file elife-21778-supp-v1.zip]

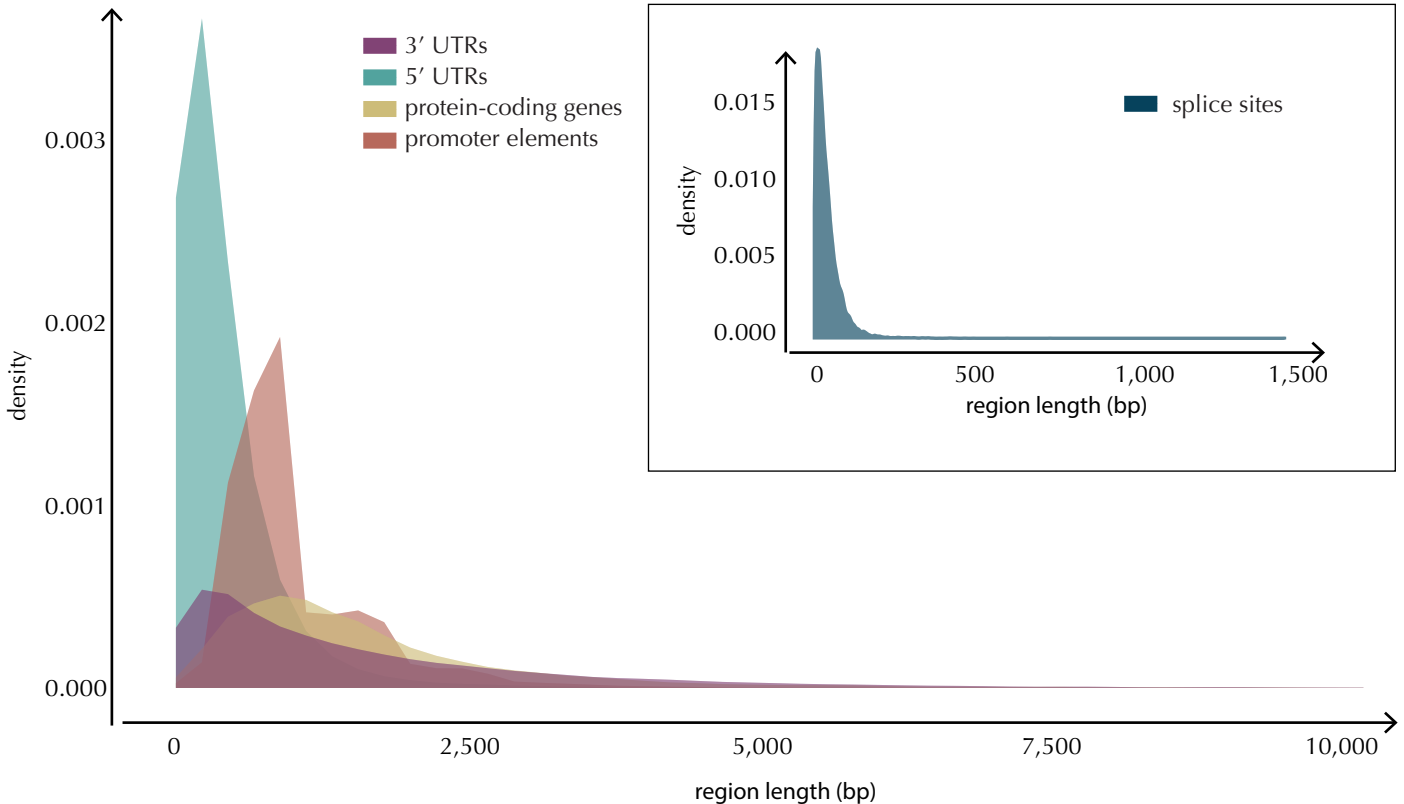

Supplement: supp [file elife-21778-supp-v1.zip]

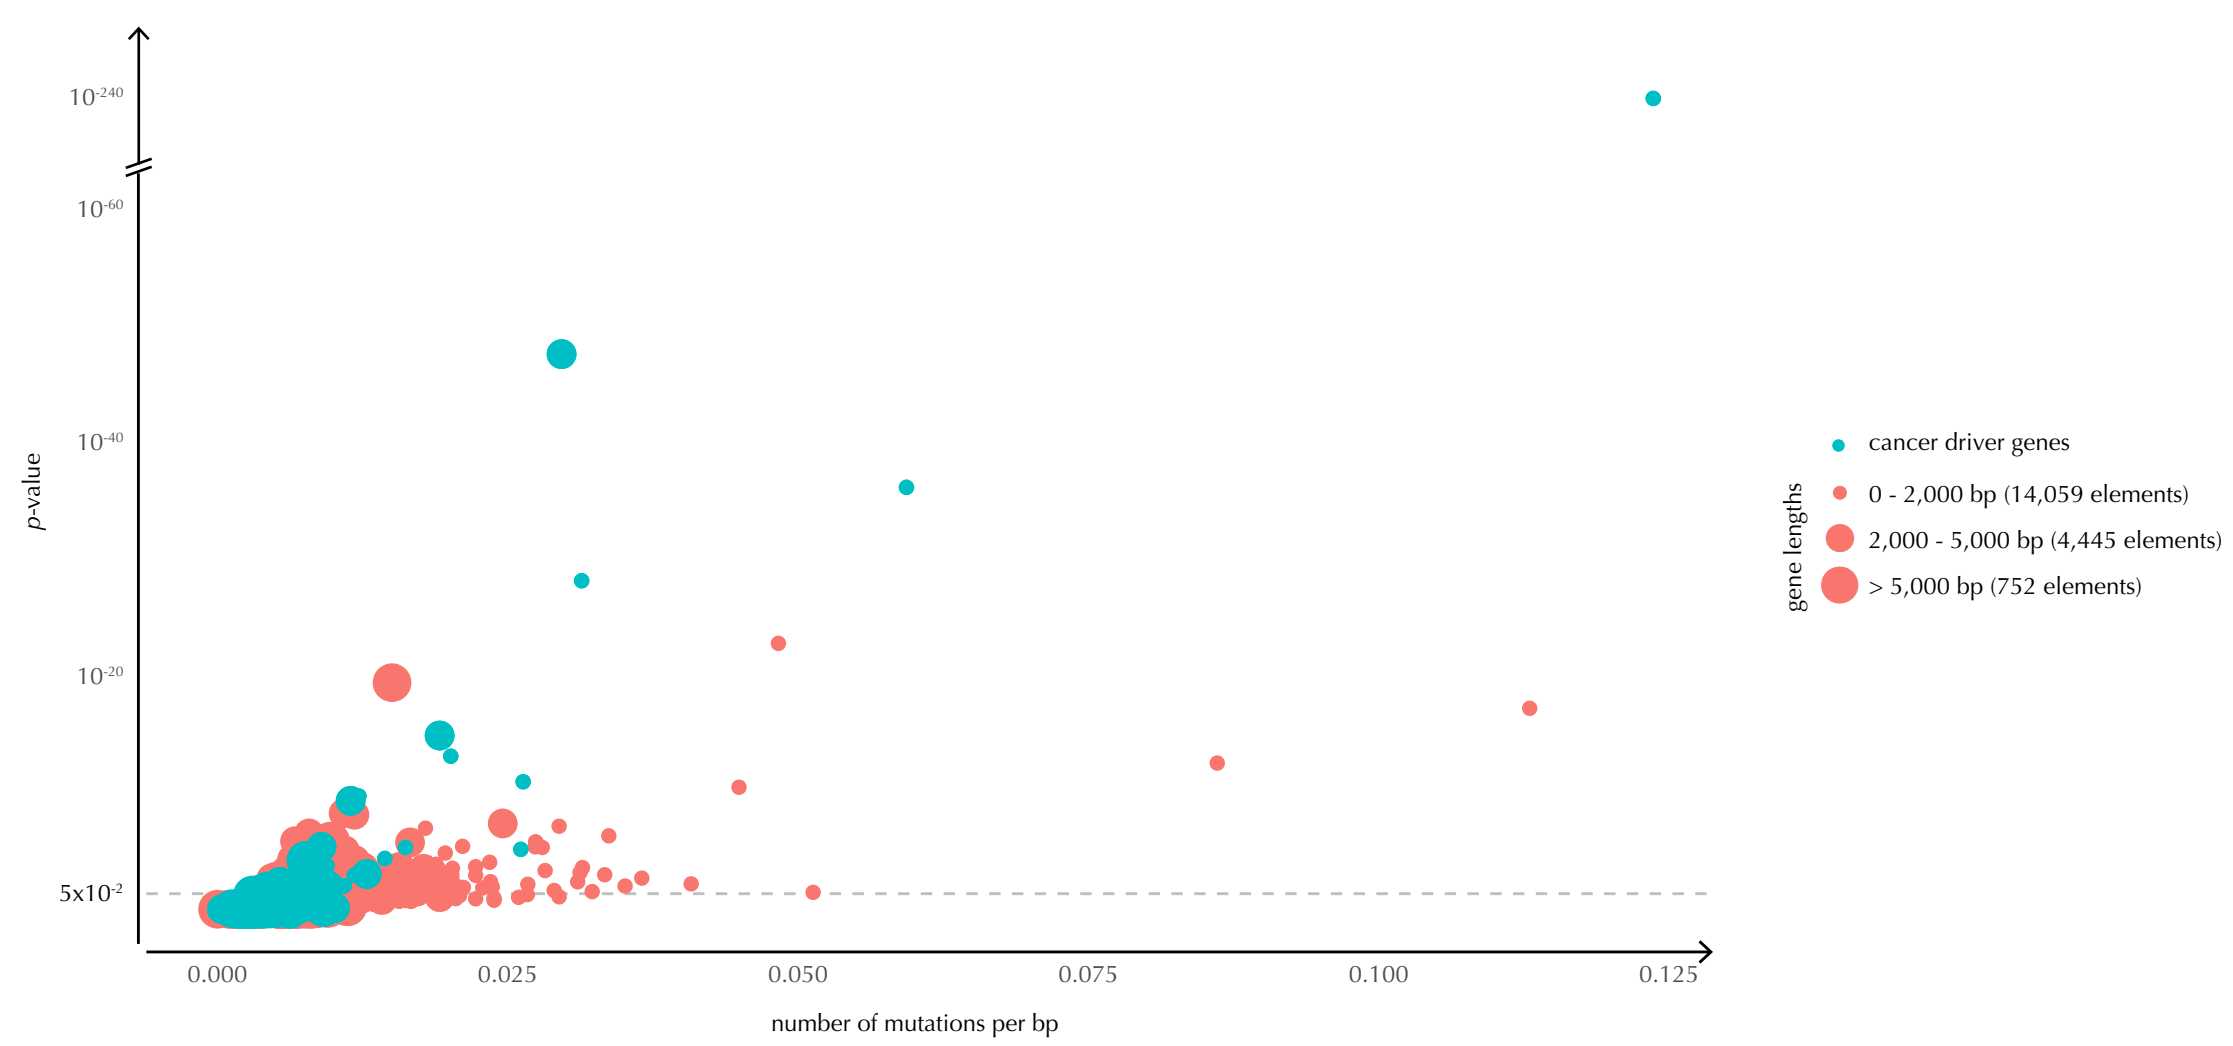

Supplement: supp [file elife-21778-supp-v1.zip]

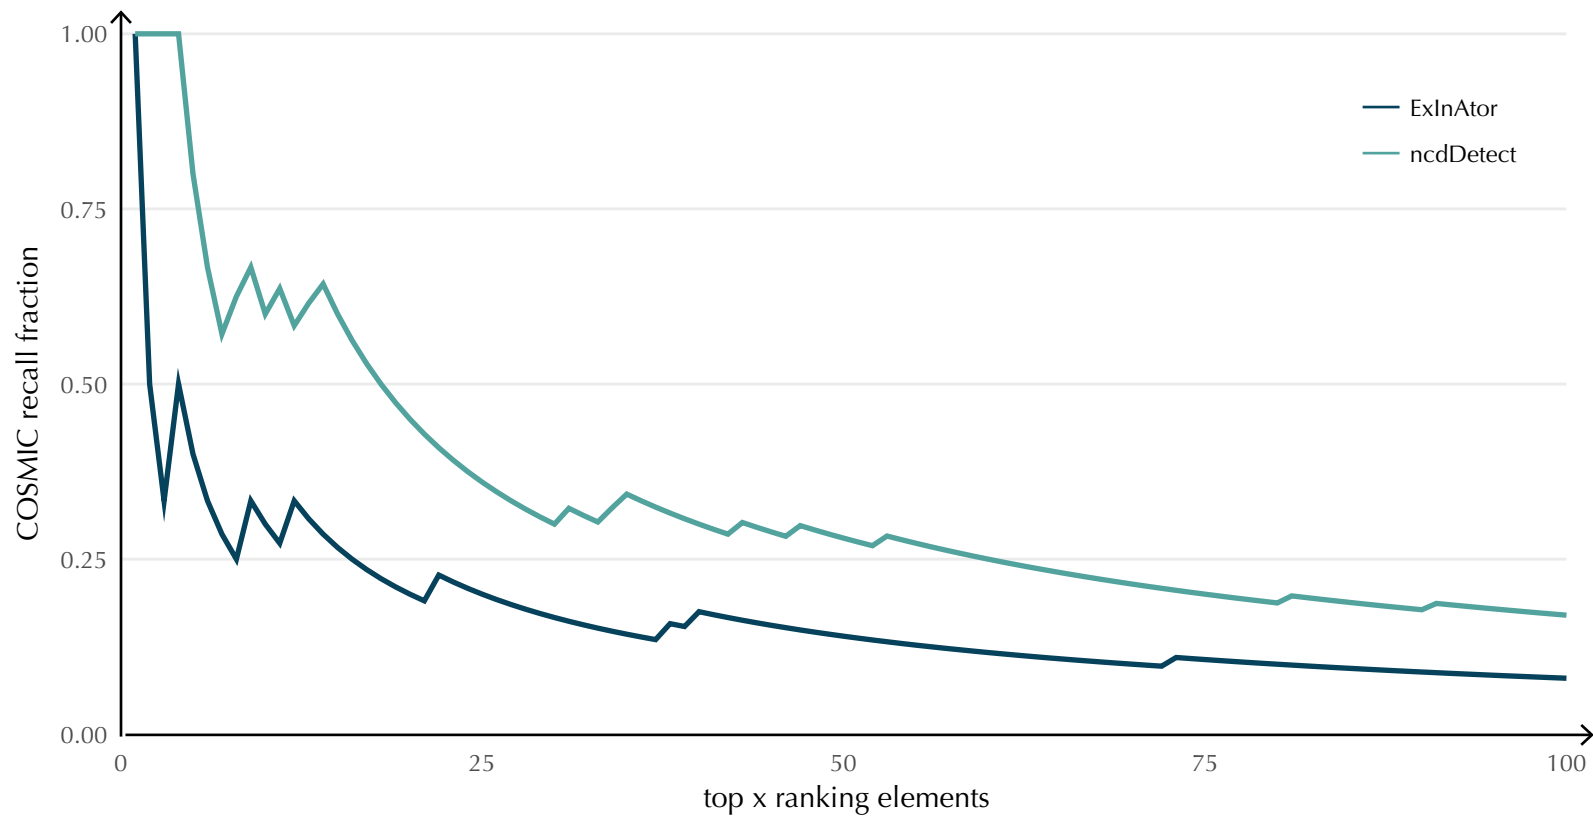

Supplement: supp [file elife-21778-supp-v1.zip]

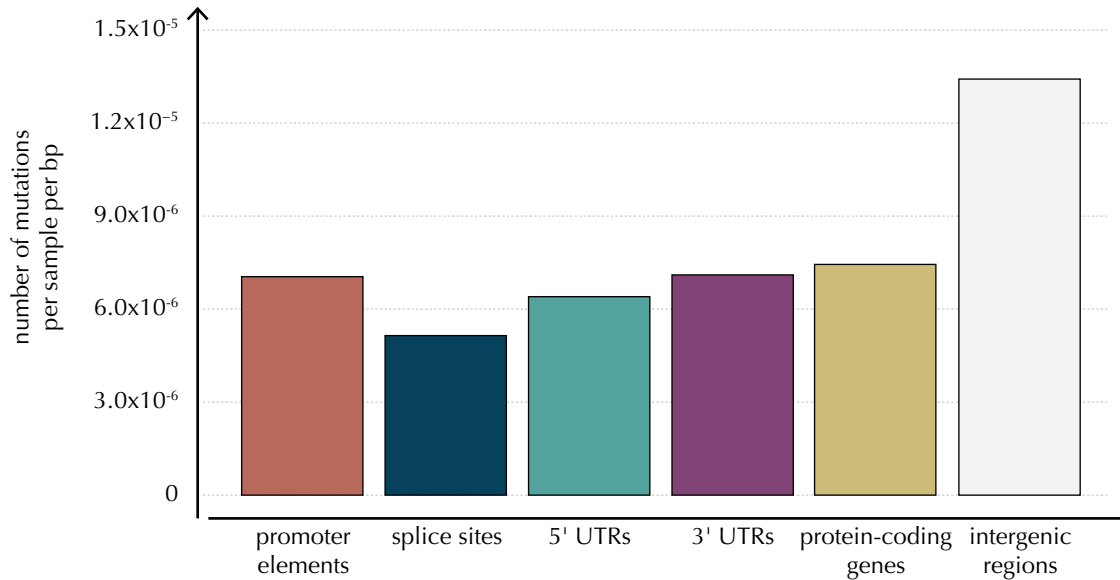

Supplement: supp [file elife-21778-supp-v1.zip]

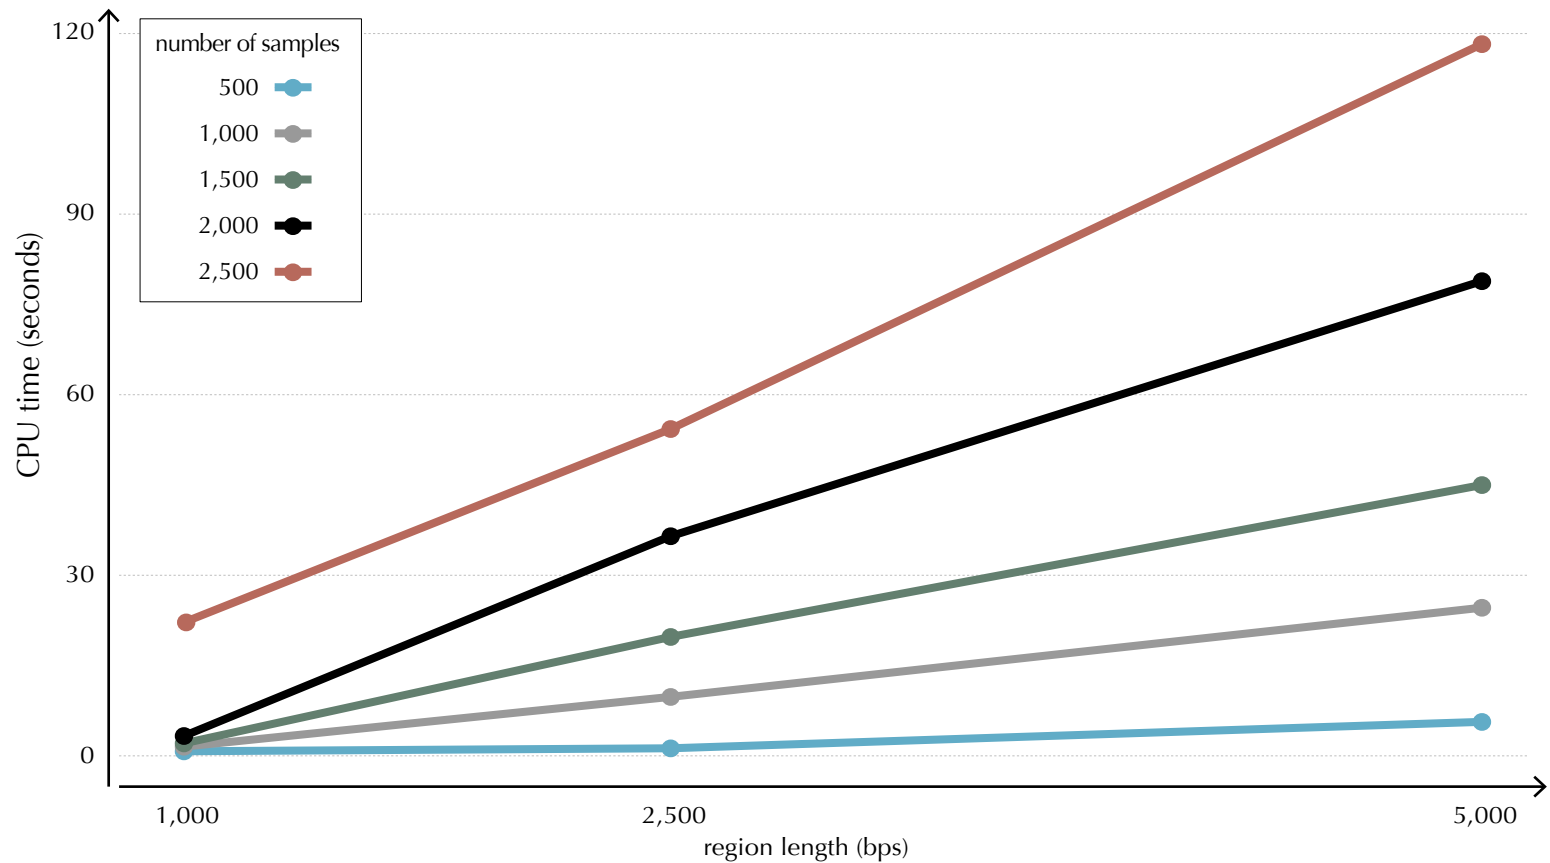

Supplement: supp [file elife-21778-supp-v1.zip]

A

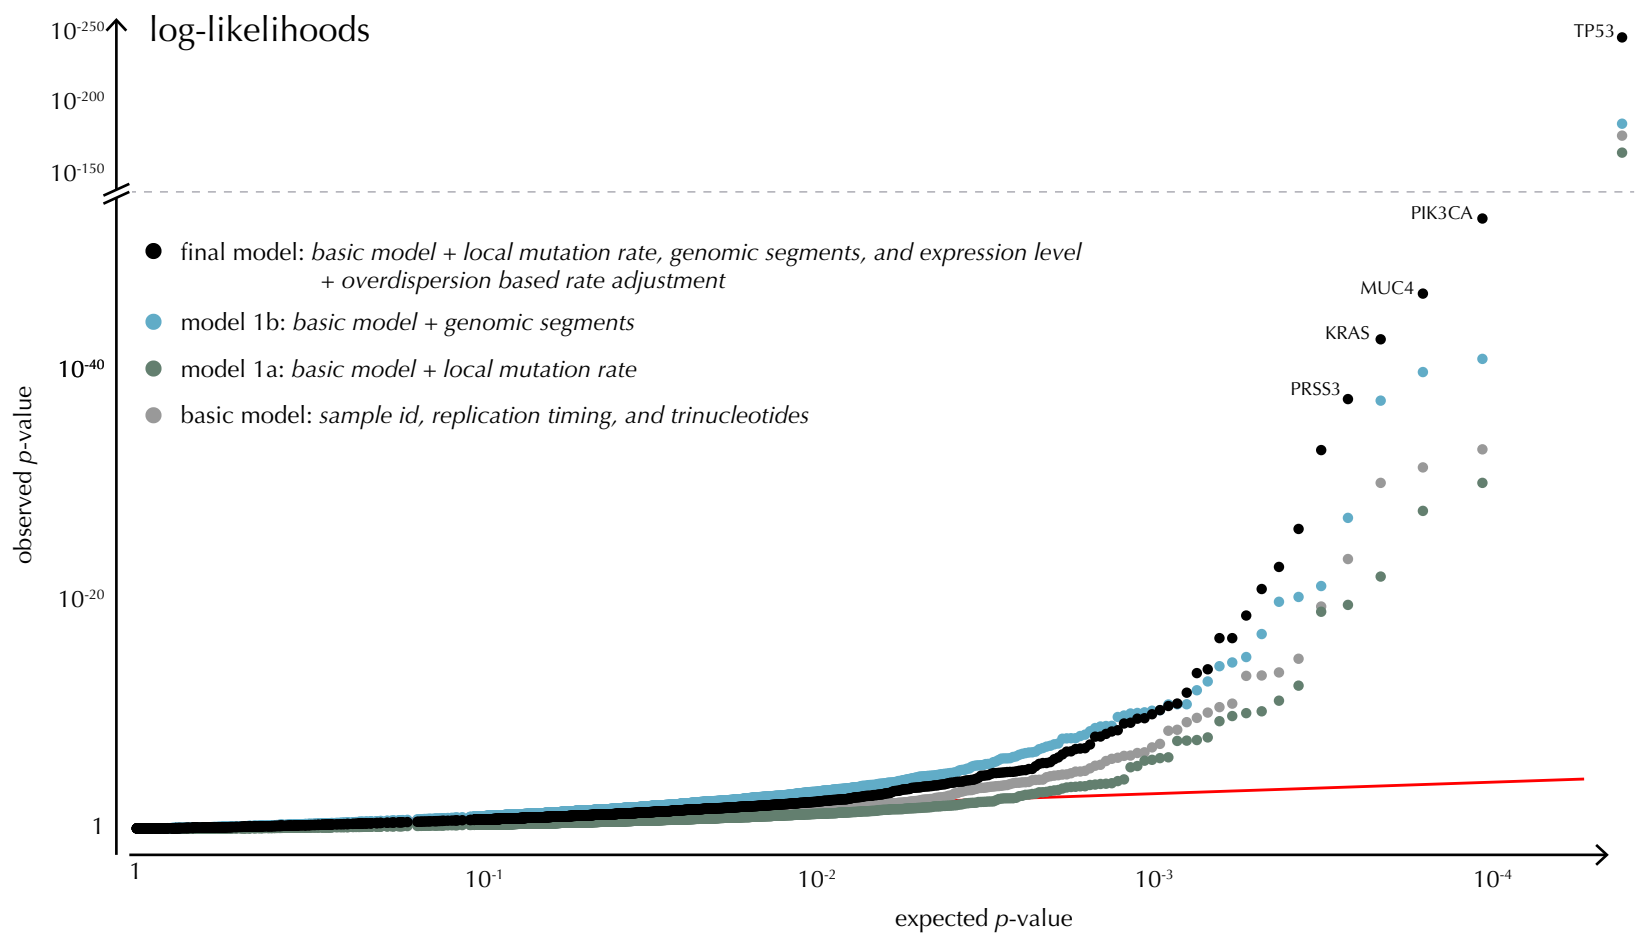

B

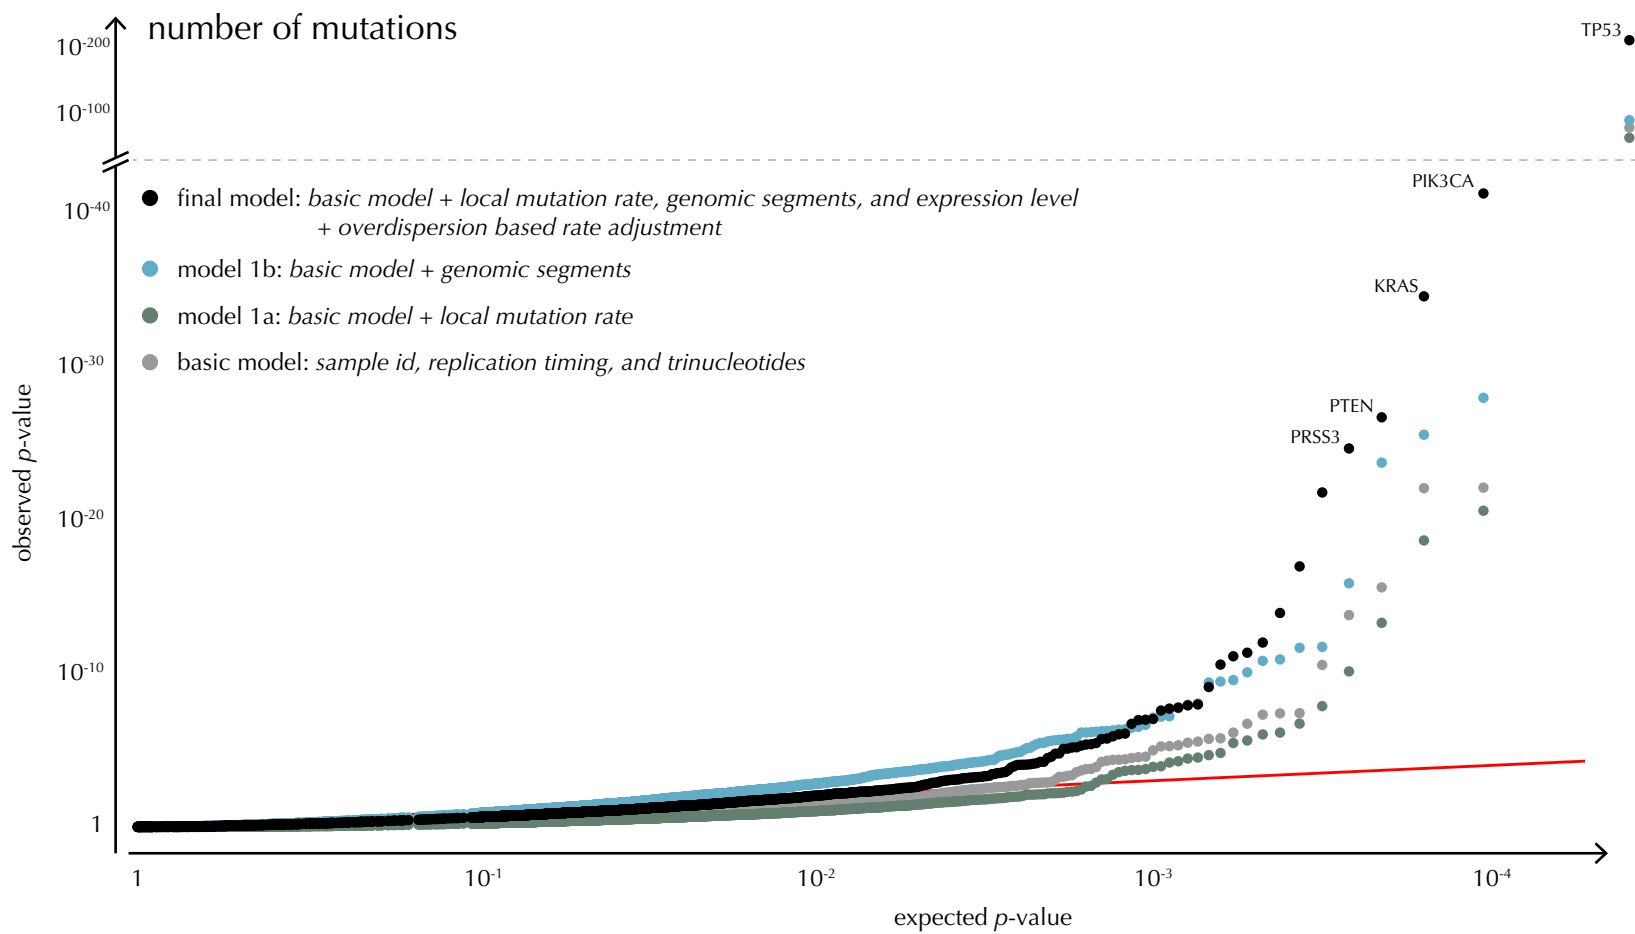

Supplement: supp [file elife-21778-supp-v1.zip]

A

promoter elements

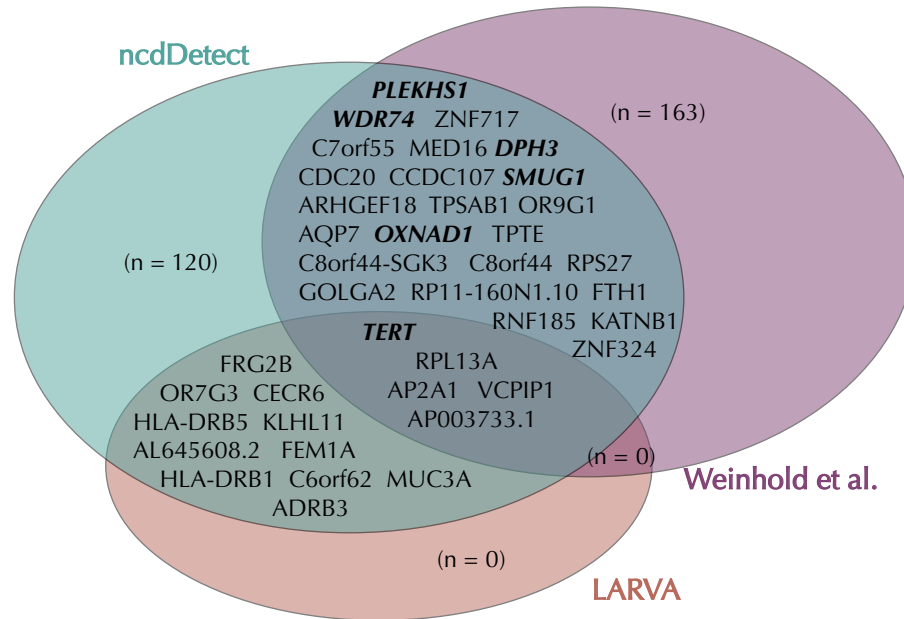

B

3' UTRs

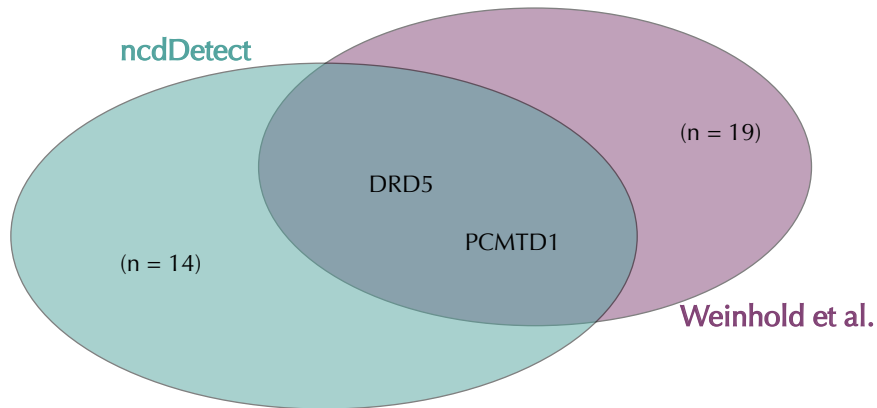

C

5' UTRs

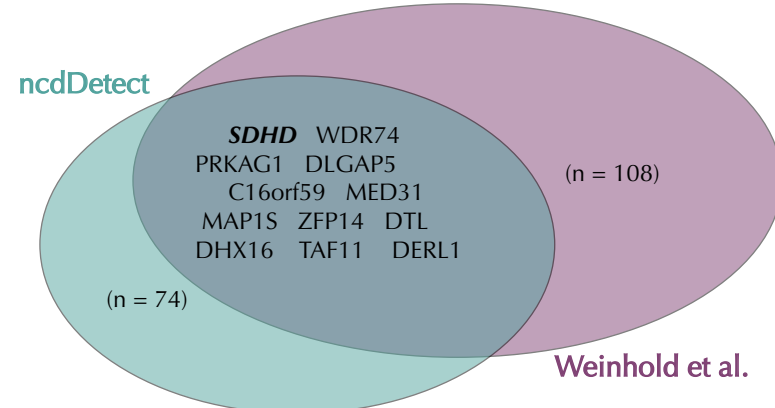

Supplement: supp [file elife-21778-supp-v1.zip]

A

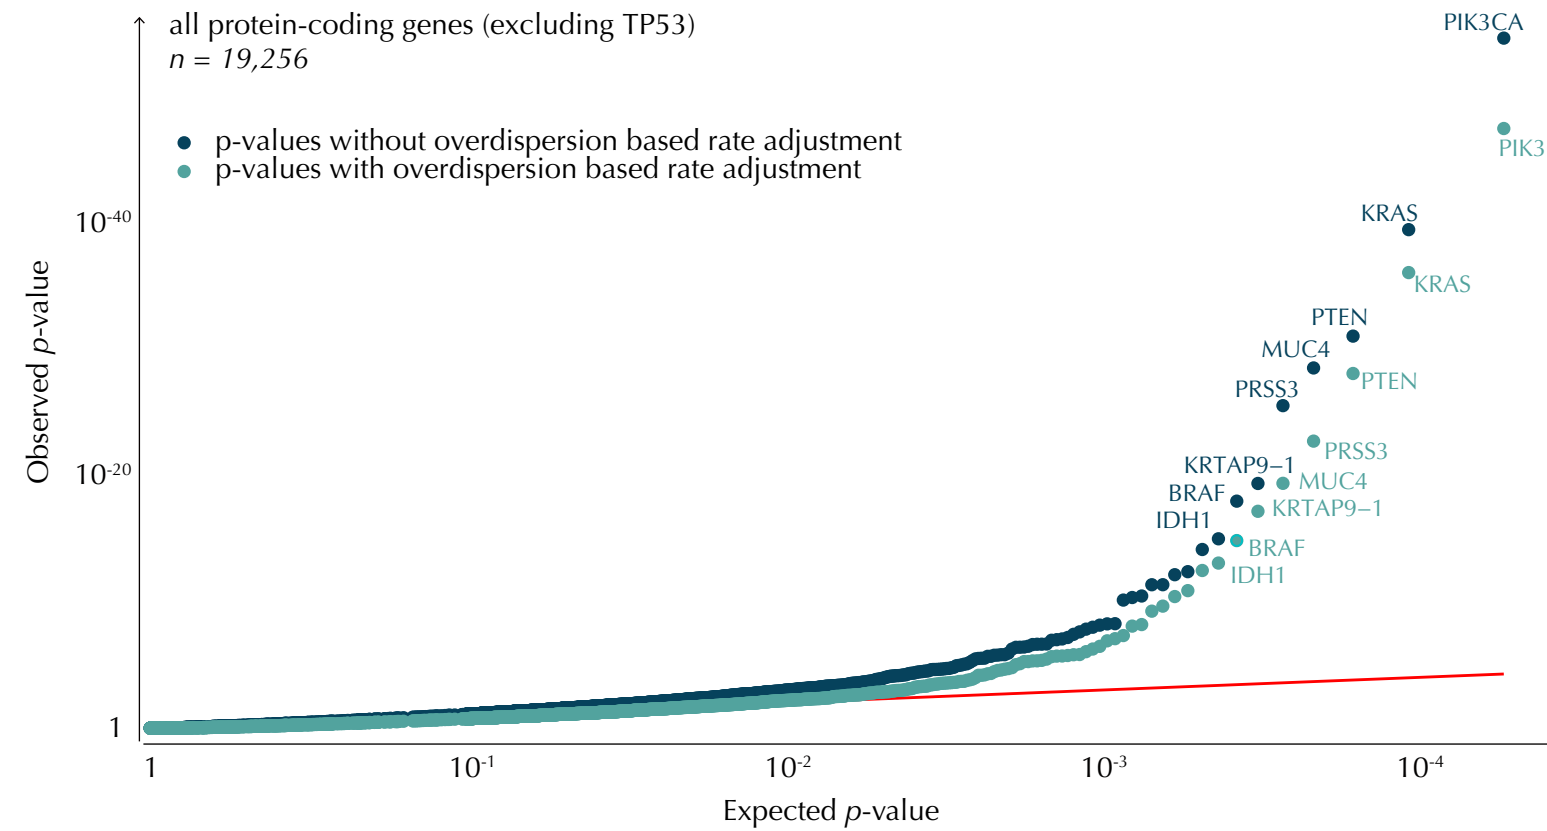

B

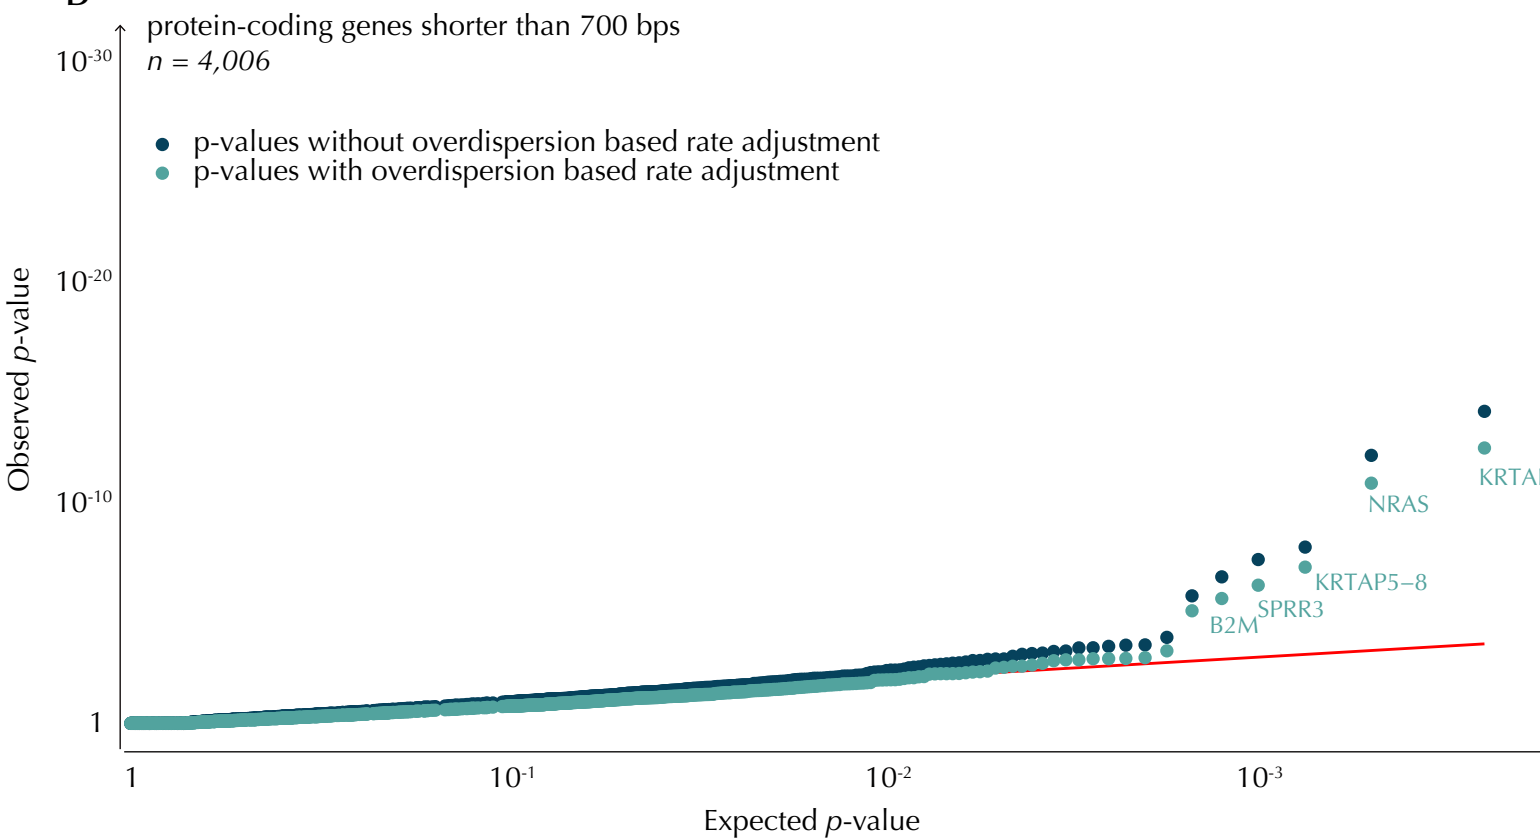

C

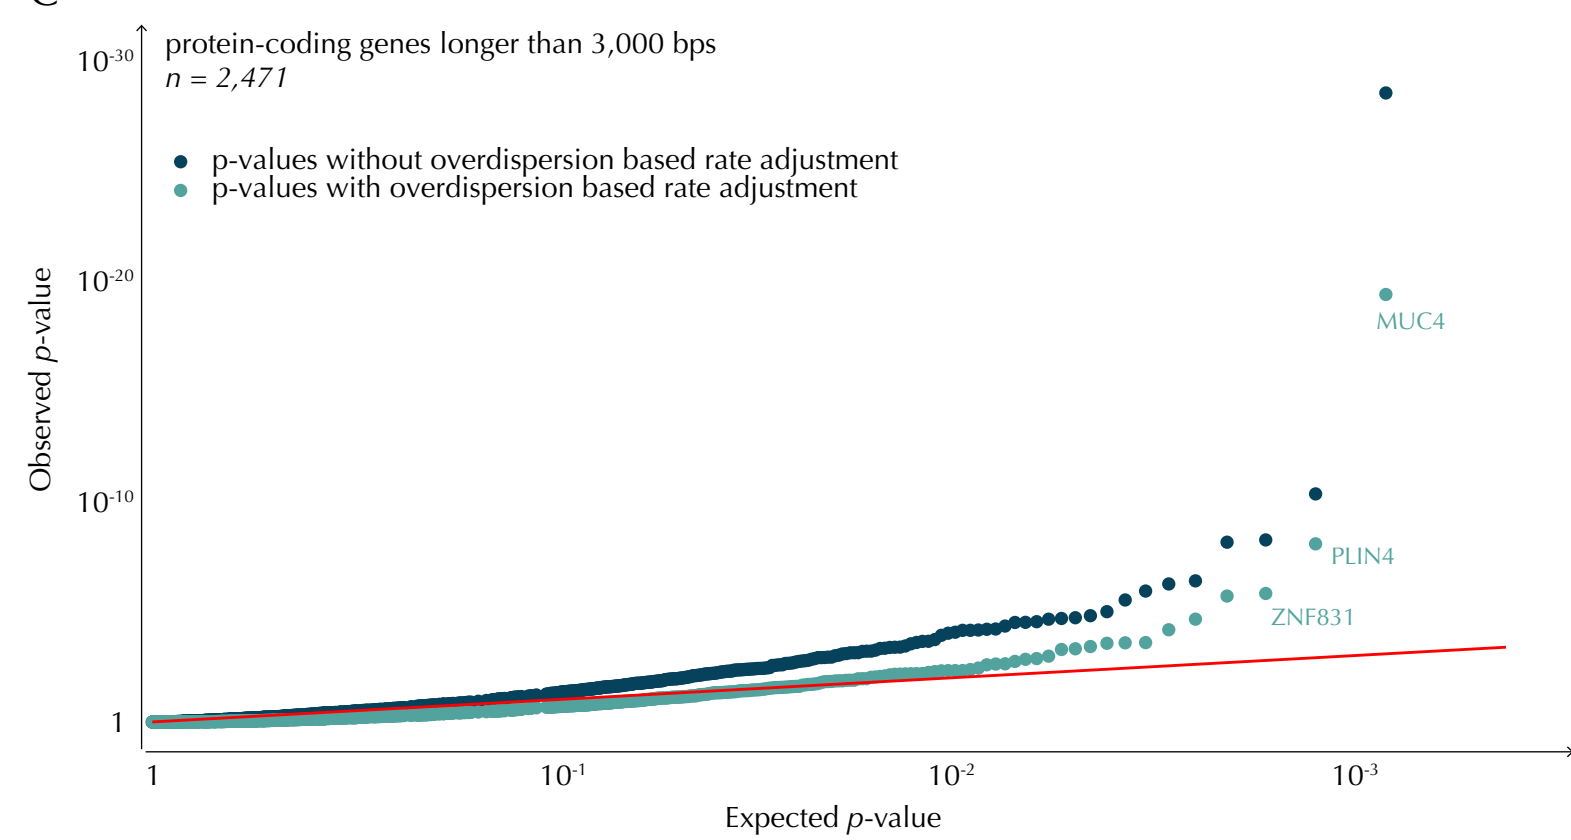

Supplement: supp [file elife-21778-supp-v1.zip]
